# Supplementary material
Source: PubMed Central journal article supplement (PMC4460505)
Supplement: pnas.201411263SI.pdf [file pnas.201411263SI.pdf]

# Supporting Information

Goff et al. 10.1073/pnas.1411263112

## SI Materials and Methods

**Mice.** lncRNA KO mice were generated in collaboration with Regeneron Pharmaceuticals by replacing the selected lncRNA gene with a *lacZ* reporter cassette as previously described (1). Briefly, targeting vectors were constructed using the VelociGene technology (2), and targeted mouse ES cell clones then were introduced into an eight-cell-stage mouse embryo using the VelociMouse method (3). To remove the *loxP*-flanked neomycin resistance gene included in the lncRNA targeting constructs for the initial selection, each of the original C57BL/6J backcrossed mutant strains (1) was crossed once with the cre-recombinase strain B6.C-Tg(CMV-cre)1Cgn/J, and subsequently backcrossed once with C57BL/6J. For each strain, mice free of both the neomycin-resistance and cre-recombinase genes were selected for colony expansion. The strains (N3 for all mutant strains except *Kantr*, which is N2.5) were maintained by heterozygous breeding, and mutant mice were identified by genotyping for loss of the lncRNA allele and gain of the *lacZ* cassette (Transnetix, Inc.). Heterozygous mice at E14.5 and at 2–3 mo of age (adult) were used to determine the brain expression pattern of each lncRNA (knocked-in *lacZ* reporter gene). E14.5 and adult KO and WT littermate mice were used to determine the effects of lncRNA deletion on global gene expression (RNA-seq). Mice were killed either by CO<sub>2</sub> inhalation followed by cervical dislocation or by transcardial perfusion-fixation performed under Avertin anesthesia. Mice were housed under controlled pathogen-free conditions at Harvard University's Biological Research Infrastructure, and all procedures were carried out in accordance with National Institutes of Health guidelines for the care and use of laboratory animals and were approved by the Harvard University Committee on the Use of Animals in Research and Teaching.

**Tissue Collection and Processing.** For  $\beta$ -gal expression, E14.5 whole brains were harvested from embryos fixed by immersion in 4% (vol/vol) PFA at 4 °C overnight. Tissue samples were collected before fixation for genotyping (Transnetix, Inc.). Adult whole brains were harvested from heterozygous mice after fixation by transcardial perfusion with 4% (vol/vol) PFA and were postfixed in 4% (vol/vol) PFA at 4 °C for 12 h. Coronal sections (40- $\mu$ m thick) were cut on a vibrating microtome and mounted on VistaVision HistoBond SuperFrost Plus slides (VWR). For RNA isolation, E14.5 whole brains were harvested and immediately homogenized in TRIzol (Life Technologies, 1 mL per brain). Whole brains from adult KO and WT mice were harvested immediately after mice were killed, snap frozen in liquid nitrogen, and stored at –80 °C. Frozen whole brains were pulverized in liquid nitrogen and homogenized in TRIzol (5 mL per brain). One-milliliter aliquots of the TRIzol lysates were used for RNA isolation.

**$\beta$ -Gal Staining and Immunostaining.** Brain-wide expression of the *lacZ* reporter gene was assessed in all mutant strains by histochemical detection of  $\beta$ -gal (X-gal staining) ( $n = 2$ ). Staining was performed on coronal brain sections, whole brains, or whole embryos as previously described (1). Postfixed stained whole embryos were stored in 70% (vol/vol) ethanol before brain dissection and sectioning. Sequential sections, obtained at every 80  $\mu$ m for E14.5 brains and at every 240  $\mu$ m for adult brains, were imaged at 5 $\times$  and 10 $\times$  magnification using a Zeiss Axio Scan.Z1, a Nikon 90i microscope equipped with a Retiga Exi camera (QIMAGING), or a Zeiss LSM700 confocal microscope. Im-

munohistochemistry for  $\beta$ -gal and immunostaining for the interneuron marker TH was performed using standard methods. Primary antibodies and dilutions were chicken anti- $\beta$ -gal (1:500; CGAL-45; ICL) and rabbit anti-TH (1:5,000; AB152; Chemicon). Appropriate secondary antibodies were from the Molecular Probes Alexa series. Images were acquired and processed with the Zen (Zeiss) or Volocity analysis software v4.0.1 (Improvision).

**mRNA-Seq Library Preparation and Sequencing.** RNA-seq was performed for 2–4 KO adult and 2–4 KO E14.5 embryos (Dataset S3) of each mutant strain, obtained from two or more litters per strain, and a total of 14 WT adult and 14 WT embryos, balanced across the different strains and litters. Whole-brain total RNA isolation and mRNA-seq library construction (TruSeq RNA Sample Preparation Kit v2; Illumina) were performed as previously described (1). The libraries were prepared using 500 ng of total RNA as input, with the exception of the E14.5 Peril libraries (250 ng), and a 10-cycle PCR enrichment to minimize PCR artifacts. KO and WT samples from different strains and age groups were processed within each library preparation to dilute any operator or batch biases. The indexed libraries were sequenced in pools of six, each pool including KO and WT samples from different strains and ages, on the Illumina HiSeq 2500 platform using the rapid-full flow cell, paired-end, 50-bp read-length sequencing protocol (NWL Bauer Core, Harvard University FAS Center for Systems Biology).

**Read Alignment, Quantitation, and RNA-Seq Analysis.** Sequencing reads were aligned to mm10 using Tophat2 (4) with the following additional parameters: –no-coverage-search –max-multihits 10 –p 8. No reference transcriptome was used during alignment, but Tophat2 was not prevented from identifying novel splice junctions. Each aligned sample was quantified against a modified version of the GENCODE (version M2) transcriptome as a reference (5). Each binary alignment map (bam) was then quantified using Cuffquant (6) against the reference transcriptome with the following additional parameters: –no-update-check –p 8. Pairwise differential analysis was performed on each combination of KO and WT conditions using Cuffdiff v2.2.1 (6) with the following additional parameters: –p 8.

To standardize the analysis of each differential comparison, we created a report template that integrated components from several R/Bioconductor (7) packages including cummeRbund (8), gene set analysis (GSA) (9), clusterProfiler (10), and limma (11). The analysis template is made available as Dataset S7, and individual KO versus WT reports are collected in Dataset S6. Gene set analysis (GSA) was performed on the test-stat-rank-ordered list of genes for each comparison using the GSA R/Bioconductor package (9) and compared against gene sets derived from the curated collections at MSigDB (12) including Reactome (c2.cp.reactome.v4.0), Biocarta (c2.cp.biocarta.v4.0), Kyoto Encyclopedia of Genes and Genomes (KEGG) (c2.cp.kegg.v4.0), Transcription Factor Targets (c3.tft.v4.0), Oncogenic signatures (c6.all.v4.0), and Immunologic signatures (c7.all.v4.0). GO, Reactome, and KEGG enrichment analysis was additionally performed using the clusterProfiler R/Bioconductor package on the lists of significantly differentially expressed genes as detailed in Dataset S7.

**Digital Genotyping.** Genotypes were confirmed after sequencing by isoform-level expression plots for each lncRNA and the *lacZ* reporter in each replicate. Gene tracks were constructed from indexed bam files after alignment of sequencing reads with



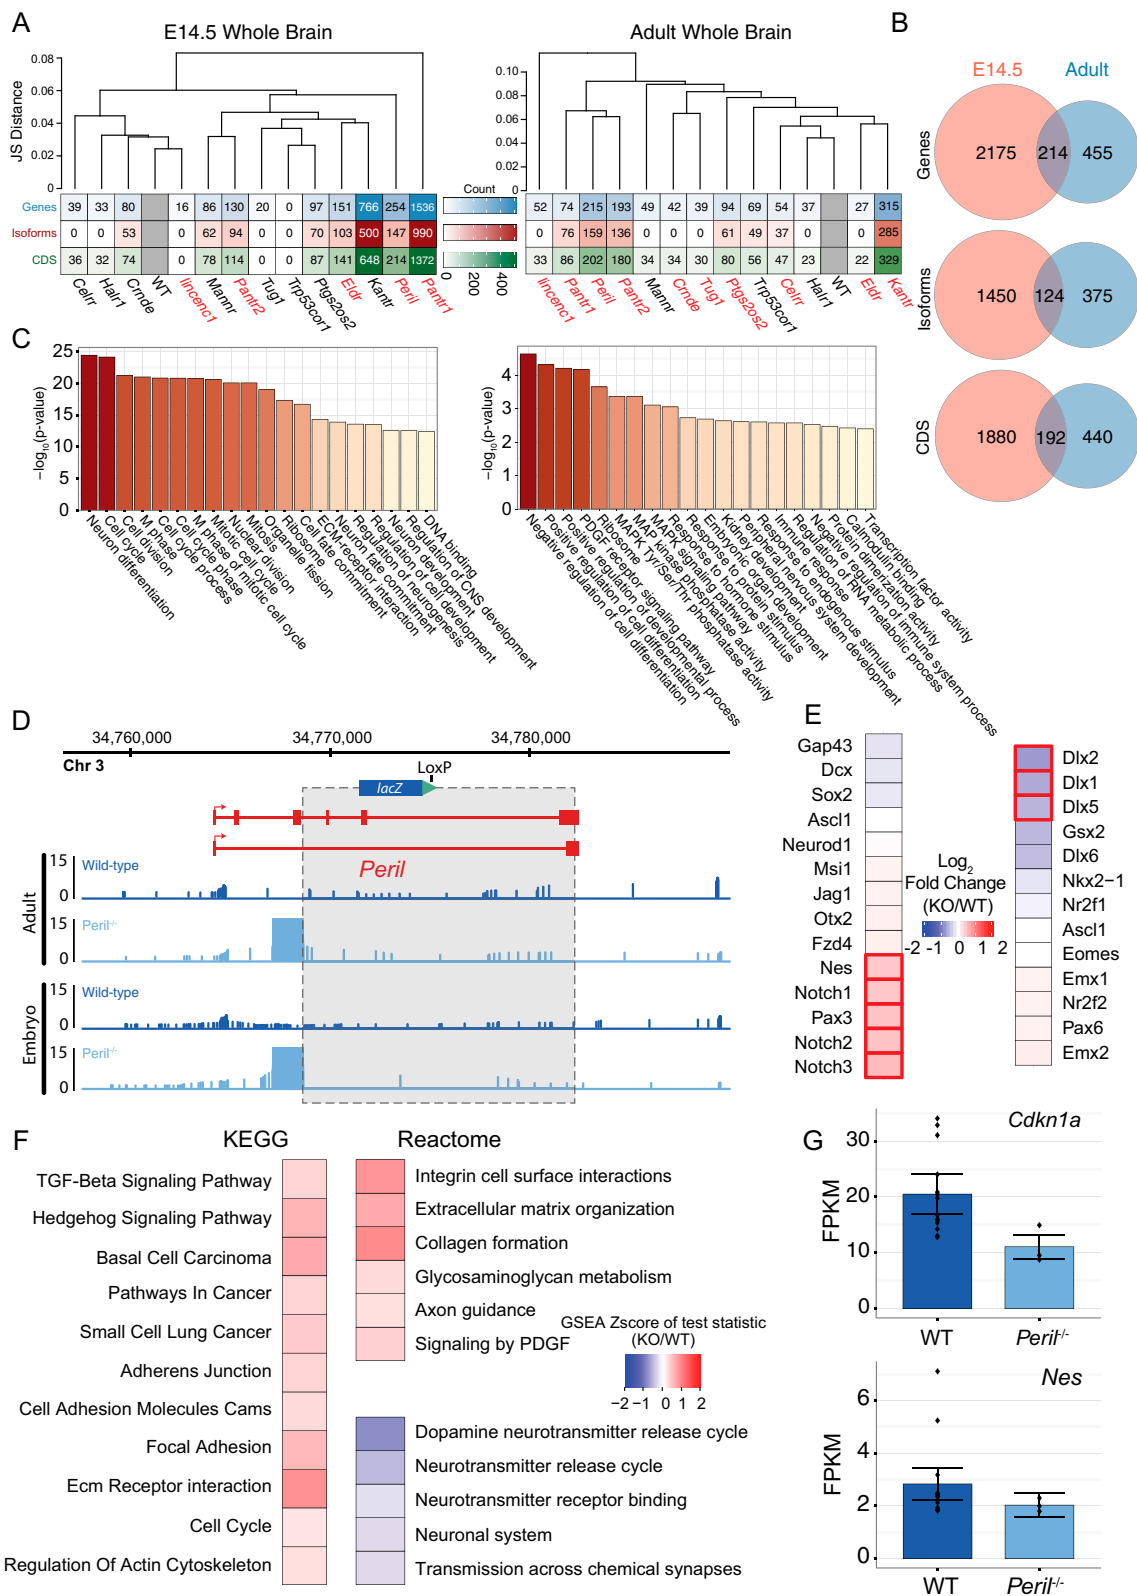

**Fig. S2.** RNA-sequencing highlights transcriptional changes in developing and adult *Peril* mutant brains. (A) Differentially expressed genes, isoforms, and CDS between WT and KO whole brains at E14.5 or adult time points. The dendrogram represents hierarchical clustering of conditions by Jensen-Shannon distance using the normalized expression profiles of the universe of differentially expressed genes across all pairwise comparisons. WT is included to provide a benchmark condition against which global transcriptional changes in the KO strains can be evaluated. (B) Total number of differentially expressed genes, isoforms, or CDS at either E14.5 or adult and the overlap between these two sets. (C) GO analysis of the universe of significantly differentially regulated genes in any strain at any time point. (D) *Peril* locus, transcript structure, and representative read density profiles from WT and KO embryonic and adult brains. (E) Progenitor marker enrichment or depletion by *Peril*<sup>-/-</sup> embryonic RNA-seq. Red outline denotes significance. (F) Select GSEA results from *Peril* embryonic RNA-seq analysis. (G) Expression plots for *Cdkn1a* or *Nestin* in WT and *Peril*<sup>-/-</sup> adult brain RNA-seq.





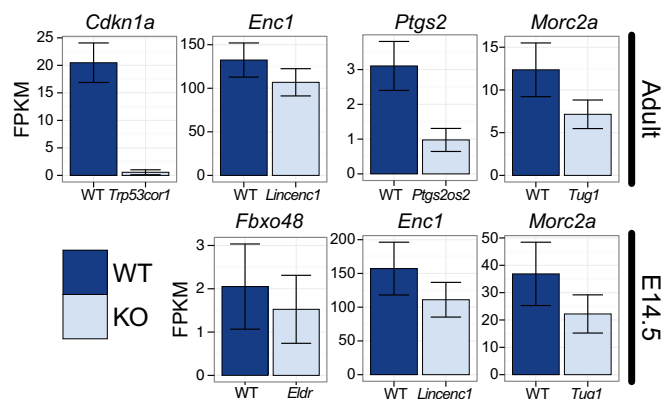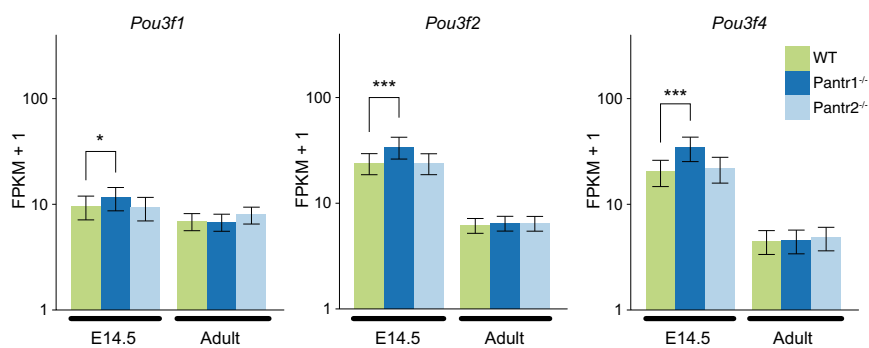

**Fig. S6.** *Pou3f1*, *Pou3f2*, and *Pou3f4* expression. RNA-seq expression estimates (average from triplicates) for *Pou3f1*, *Pou3f2*, and *Pou3f4* in E14.5 and adult brains collected from WT, *Pantr1*<sup>-/-</sup>, and *Pantr2*<sup>-/-</sup> mutant mice. \**P* < 0.05, \*\*\**P* < 0.001, Student's *t* test.

**Table S1. lncRNA genomic and targeted deletion coordinates (mm10)**

| MGI symbol       | Aliases                                                          | Genomic coordinates, mm10 | Strand | Targeted deletion coordinates, mm10 | RNA-seq expression, E14.5 |            | LacZ staining, E14.5 sections | RNA-seq expression, adult |            | LacZ staining, adult sections |
|------------------|------------------------------------------------------------------|---------------------------|--------|-------------------------------------|---------------------------|------------|-------------------------------|---------------------------|------------|-------------------------------|
|                  |                                                                  |                           |        |                                     | lncRNA, FPKM              | LacZ, FPKM |                               | lncRNA, FPKM              | LacZ, FPKM |                               |
| <i>Pantr1</i>    | <i>linc-Brn1a</i> ,<br><i>Pou3f3os</i> ,<br><i>2610017I09Rik</i> | chr1:42648200–42694825    | –      | chr1:42648176–42694815              | 159.09                    | 43.59      | +                             | 61.29                     | 15.52      | +                             |
| <i>Pantr2</i>    | <i>linc-Brn1b</i> ,<br><i>2610207O16Rik</i>                      | chr1:42707061–42713454    | –      | chr1:42707143–42713698              | 2.35                      | 9.26       | +                             | 1.24                      | 6.02       | +                             |
| <i>Ptgs2os2</i>  | <i>linc-Cox2</i> ,<br><i>Gm26687</i>                             | chr1:150159043–150164948  | –      | chr1:150159043–150164948            | 0.01                      | 0.76       | ND                            | 0.05                      | 6.62       | +                             |
| <i>Eldr</i>      | <i>FabI</i> ,<br><i>2810442I21Rik</i>                            | chr11:16934709–16951282   | –      | chr11:16934419–16951083             | 4.37                      | 2.74       | +                             | 0.19                      | 2.67       | +                             |
| <i>lincenc1</i>  | -                                                                | chr13:97455803–97482628   | –      | chr13:97455710–97482249             | 0.10                      | 29.06      | +                             | 0.03                      | 14.55      | +                             |
| <i>Mannr</i>     | <i>AK147070</i>                                                  | chr3:29891017–29924191    | +      | chr3:29891188–29923147              | 0.02                      | 0.88       | ND                            | 0.03                      | 0.24       | ND                            |
| <i>Halr1</i>     | <i>Haunt</i> , <i>linc-Hoxa1</i> ,<br><i>Gm15055</i>             | chr6:52102947–52113684    | +      | chr6:52106776–52115377              | 1.75                      | 4.37       | ND                            | 0.03                      | 0.41       | ND                            |
| <i>Celrr</i>     | <i>Celr</i> , <i>B230209K01Rik</i>                               | chr1:121087405–121120975  | +      | chr1:121087772–121137464            | 0.39                      | 4.06       | ND                            | 1.17                      | 1.52       | +                             |
| <i>Crnde</i>     | <i>linc-Irx5</i> ,<br><i>4933436C20Rik</i>                       | chr8:92326031–92356120    | –      | chr8:92325920–92350749              | 12.65                     | 11.69      | ND                            | 1.80                      | 1.81       | +                             |
| <i>Kantr</i>     | <i>Spasm</i> ,<br><i>2900056M20Rik</i>                           | chrX:152294824–152327493  | –      | chrX:152298544–152327475            | 7.52                      | 0.64       | ND                            | 14.11                     | 2.28       | +                             |
| <i>Trp53cor1</i> | <i>linc-p21</i> ,<br><i>Gm16197</i>                              | chr17:29057474–29079126   | –      | chr17:29057474–29079078             | 0.11                      | 0.31       | ND                            | 0.19                      | 0.07       | ND                            |
| <i>Peril</i>     | <i>Peril</i> , <i>linc-Sox2</i>                                  | chr3:34764169–34782346    | +      | chr3:34767849–34782292              | 0.02                      | 24.57      | +                             | 0.01                      | 10.35      | +                             |
| <i>Tug1</i>      | -                                                                | chr11:3639785–3648814     | –      | chr11:3639794–3648758               | 43.79                     | 4.90       | ND                            | 23.86                     | 6.67       | +                             |

FPKM, fragments per kilobase of exon per million fragments mapped; MGI, Mouse Genome Informatics Database; ND, no data.

**Dataset S1. *LacZ* samples mastersheet**

## Dataset S1

**Dataset S2.** Collection of adult brain *lacZ* images for each mutant strain

## Dataset S2

Available at [rinnlab.rc.fas.harvard.edu/BrainMap/Goff\\_Suppl\\_File\\_S2.pdf](http://rinnlab.rc.fas.harvard.edu/BrainMap/Goff_Suppl_File_S2.pdf).

**Dataset S3. RNA-seq samples mastersheet**

### Dataset S3

#### Dataset S4. RNA-seq alignment statistics

## Dataset S4

**Dataset S5. Reference genome file**

### Dataset S5

**Dataset S6.** Collection of RNA-seq summary reports for each mutant strain at each time point

[Dataset S6](#)

Reports include quality control, digital genotyping, locus visualization, differential gene and isoform analysis, GSA, GO, and *cis*-region analysis.

**Dataset S7.** R Markdown template file of analysis, methods, and algorithms for individual strain KO vs. WT RNA-sequencing differential gene-expression reports

[Dataset S7](#)
