# Supplementary material
Source: PubMed Central journal article supplement (PMC4460505)
Supplement: pnas.1411263112.sd06.pdf [file pnas.1411263112.sd06.pdf]

# Celrr KO vs WT (Adult)

This file shows the wt-v-ko comparison for Celrr.

Cuff overview:

```
## CuffSet instance with:  
## 2 samples  
## 26754 genes  
## 77524 isoforms  
## 0 TSS  
## 23066 CDS  
## 0 promoters  
## 0 splicing  
## 19954 relCDS
```

## QC

### Dispersion

Dispersion plot for genes in cuff: (Overdispersion can lead to innacurate quants)

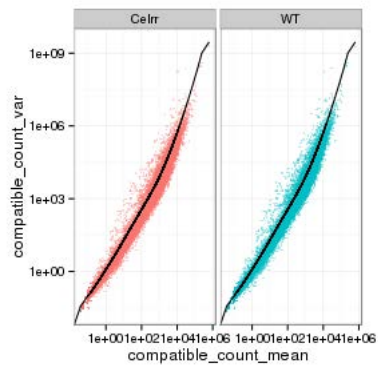

### Cross-replicate variability (fpkmSCVplot)

Differences in CV 2 can result in lower numbers of differentially expressed genes due to a higher degree of variability between replicate fpkm estimates.

Genes:

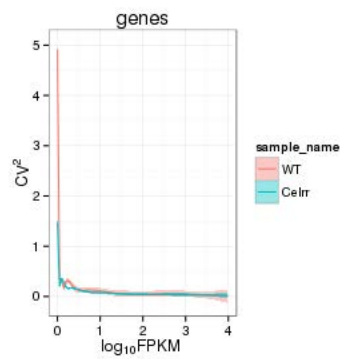

Isoforms:

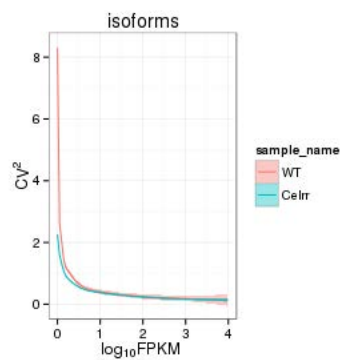

## MvA plot

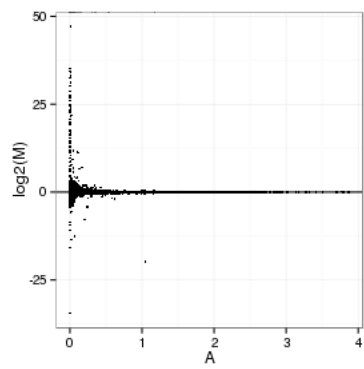

MvA plot counts

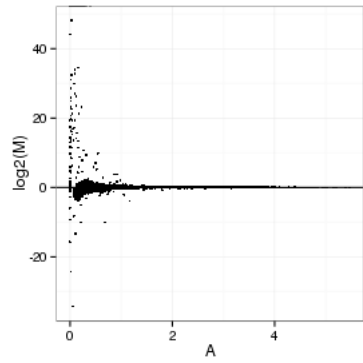

## Scatterplot matrix

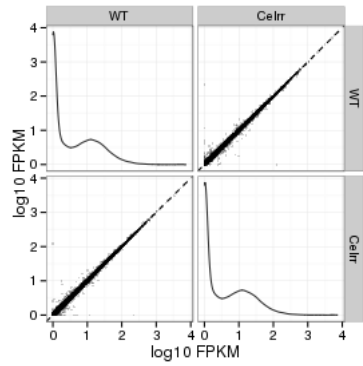

## Distributions

### Boxplots

Boxplot (genes)

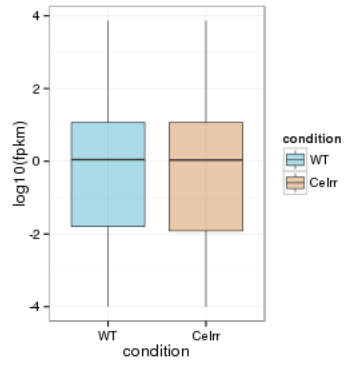

Boxplot (genes, replicates)

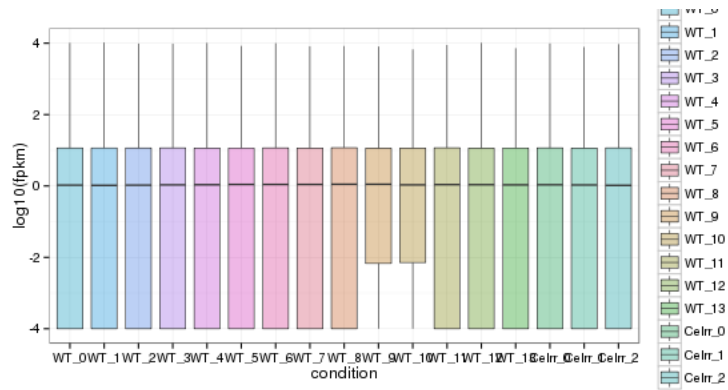

Boxplot (isoforms)

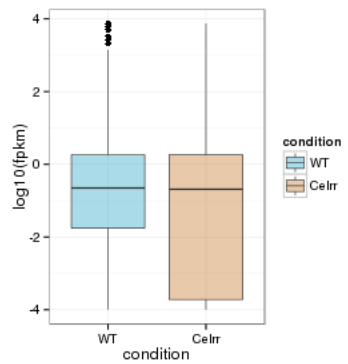

Boxplot (isoforms, replicates)



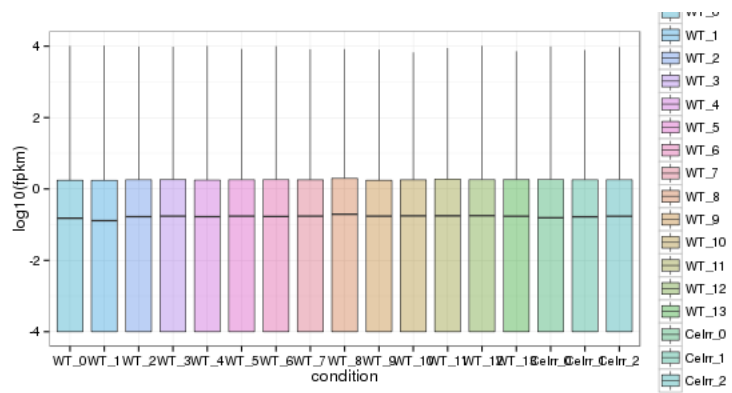

## Density

Density (genes)

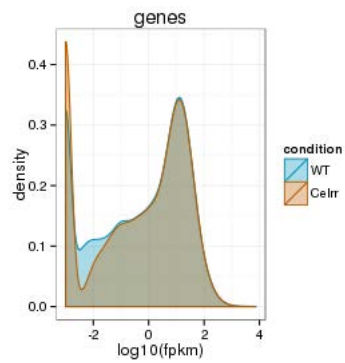

Density (genes, replicates)

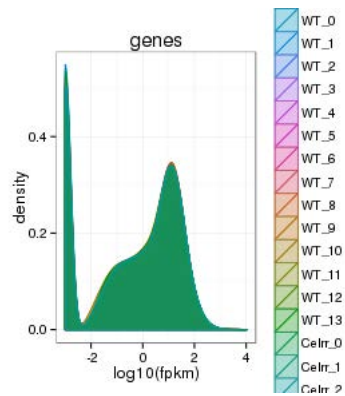

# Clustering

## Replicate Clusters

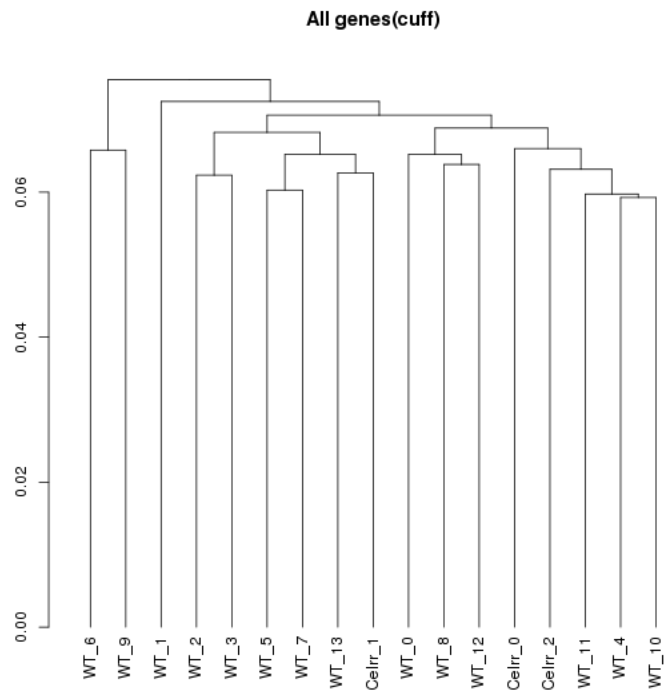

## NULL

## PCA (genes)

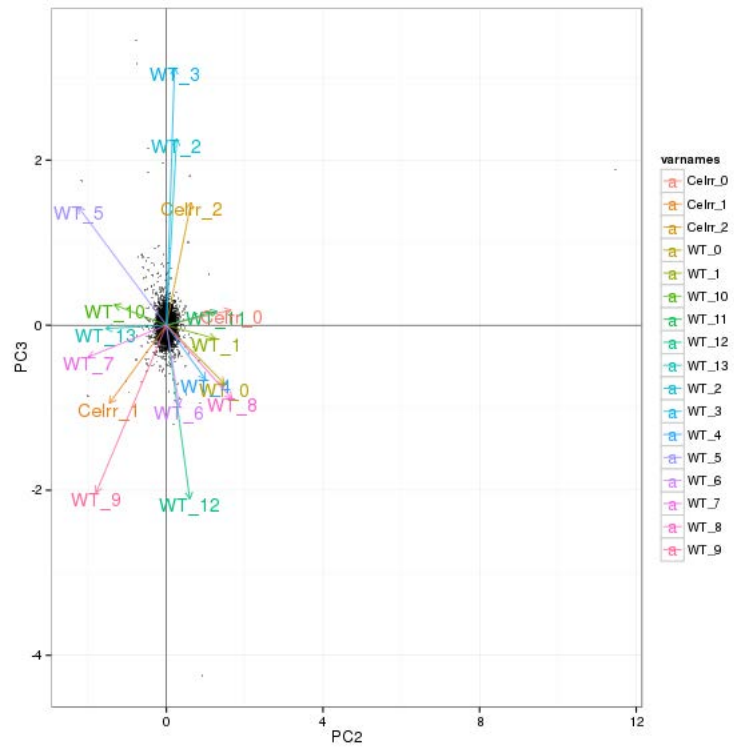

**MDS (genes)**

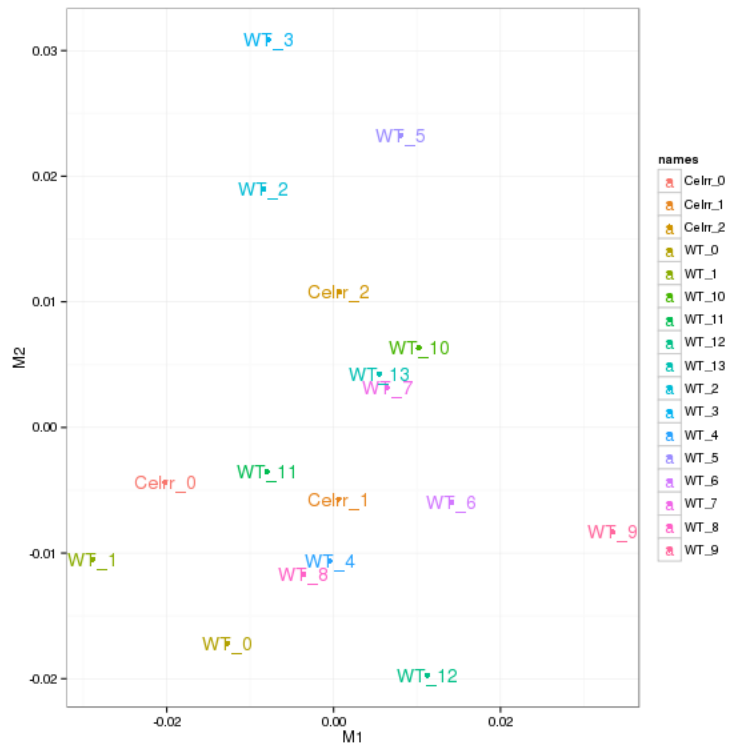

## KO assessment

Endogenous lncRNA expression

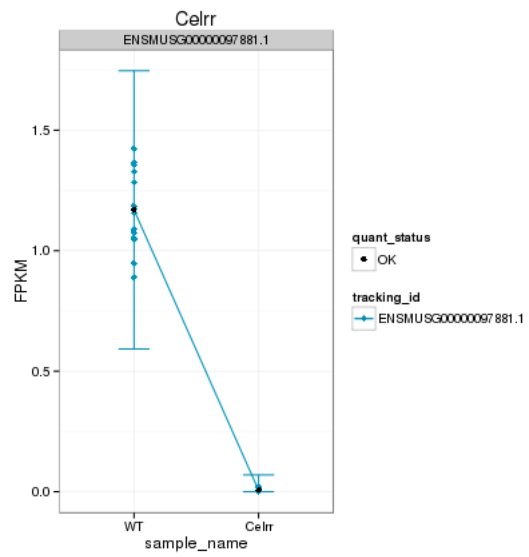

Endogenous expression of Celrr isoforms:

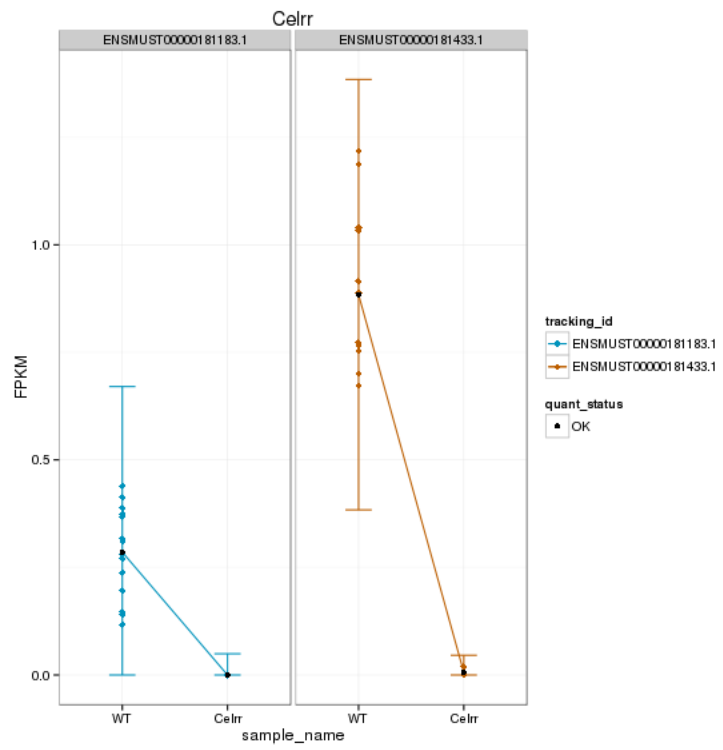

Barplot of gene expression:

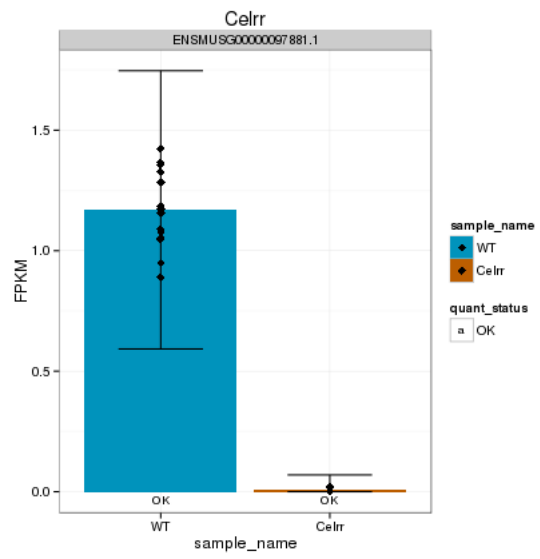

Barplot of isoform expression:

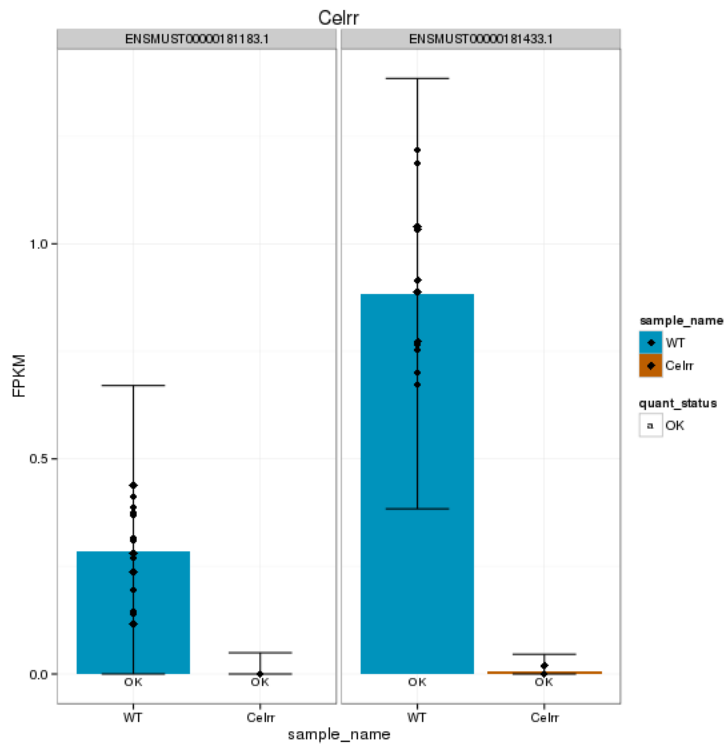

## LacZ expression

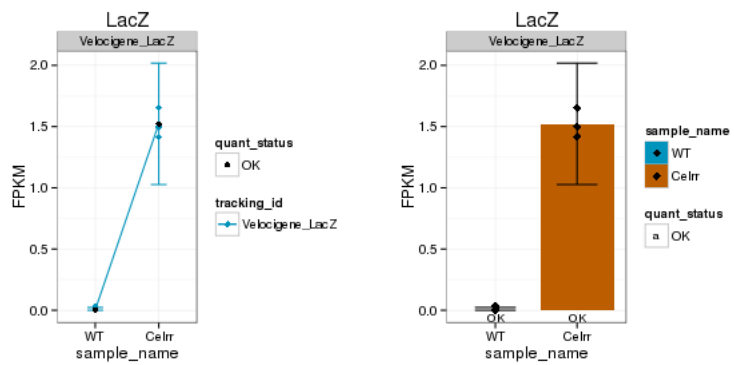

## Digital Genotyping (LacZ vs Endogenous lincRNA and Sex)

Eif2s3y is a y-expressed gene, Xist is an x-expressed gene Expression plot (endogenous linc, lacZ, Y-expressed gene):



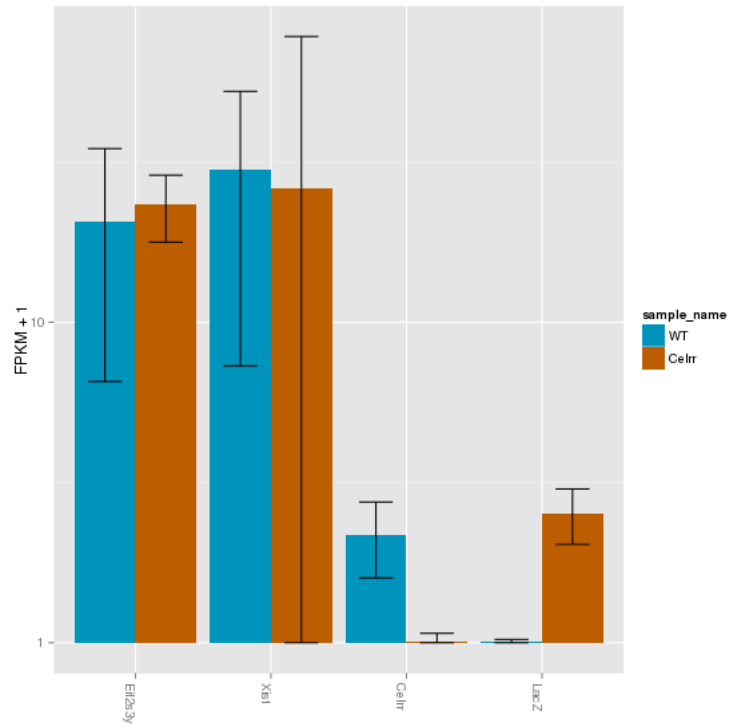

Expression heatmap:

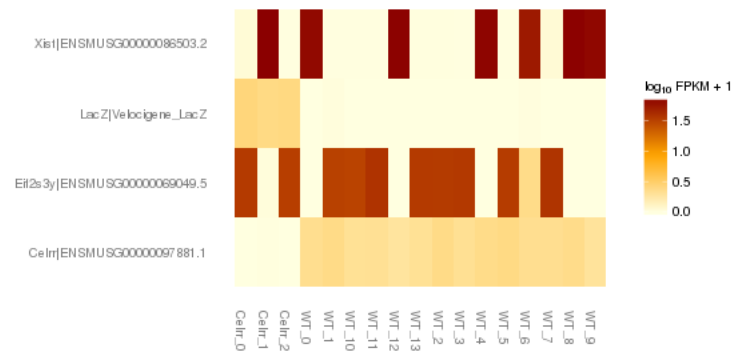

Track visualization

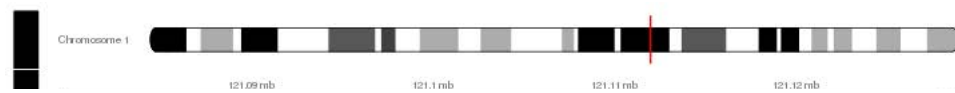

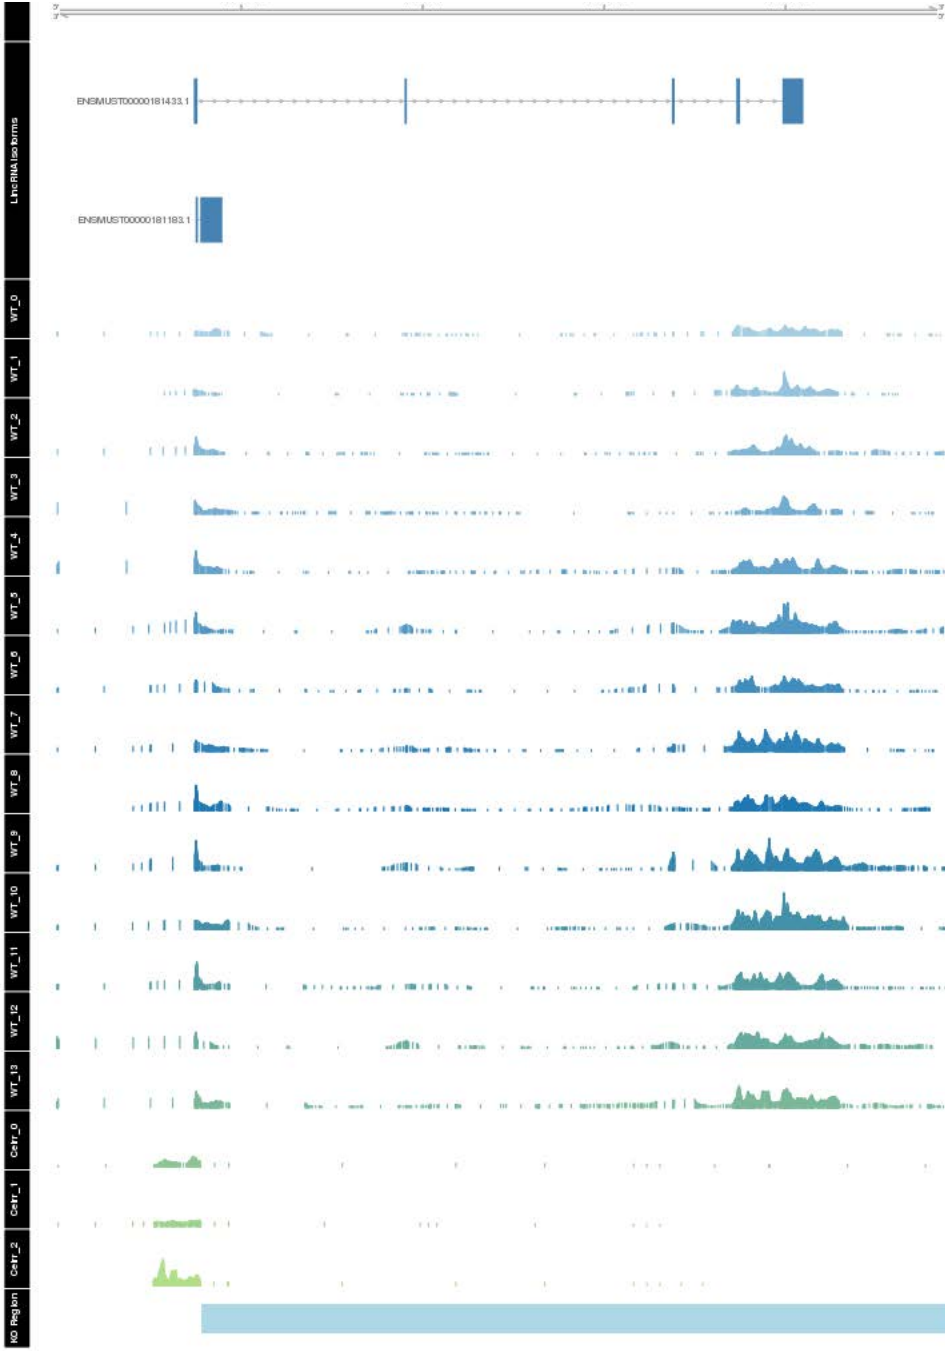

# Differential Analysis

## Differential Genes

There are 54 significantly differentially expressed genes. They are:

### geneAnnot\$gene\_short\_name

- 1 Chordc1
- 2 Nes
- 3 Dnajb1
- 4 Dio2
- 5 Slc38a3
- 6 P4ha1
- 7 Btg2
- 8 Ccdc117
- 9 Xbp1
- 10 Pdia6
- 11 Adi1
- 12 Serpina3n
- 13 Fos
- 14 Arc
- 15 Sdf2l1
- 16 Nr4a1
- 17 Creld2
- 18 Glo1
- 19 Dusp1
- 20 Pdia4
- 21 Lcn2
- 22 Hspa5
- 23 Vcam1
- 24 Hddc3
- 25 Tsc22d3
- 26 Mt2
- 27 Mt1
- 28 Pllp
- 29 Cryab
- 30 Ptgs2
- 31 Tlr13
- 32 Lars2
- 33 Egr1
- 34 Fmo2
- 35 Obfc1
- 36 Pcsk9
- 37 Gm9493

- 38 Acp1
- 39 Cirbp
- 40 Npas4
- 41 Tmem252
- 42 Opalin
- 43 Cd14
  
- 44 Tpt1
- 45 Zbtb40
- 46 Rpl34
- 47 Ppia
- 48 Gm7292
- 49 H2-BI
- 50 Wdfy1
- 51 Hspa1b
- 52 Hspa1a
- 53 Neat1
- 54 AA465934

### Matrix of gene significant differences between conditions

(skip for Brainmap wt-v-ko comparisons)

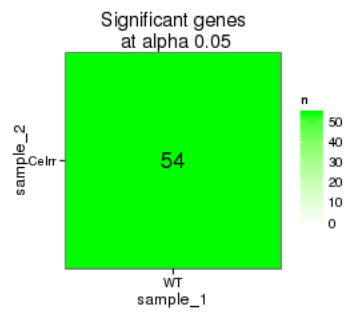

### Significant gene expression differences between conditions

Expression plot (genes):(turned off)

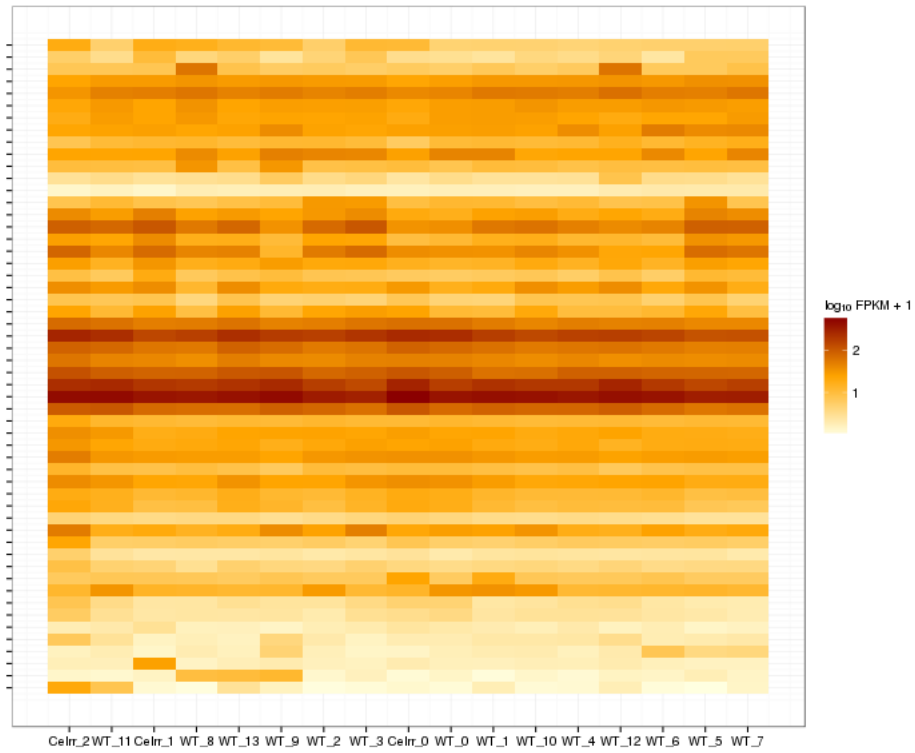

Significant genes with expression >50fpkm (any condition):(turned off)

An individual look at each of the highly expressed significantly differentially regulated genes: (eval=false for first pass)

### Expression-level/significance relationship

Scatter plot of significant genes only:

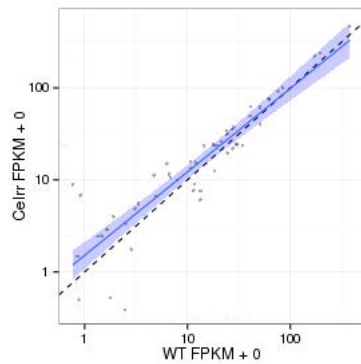

### Volcano Plot

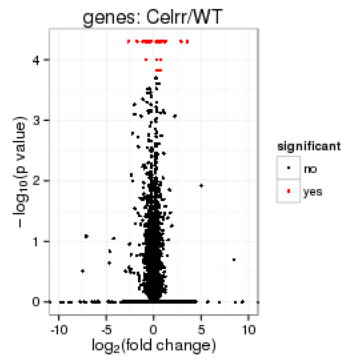

### Volcano plot with significant genes only:

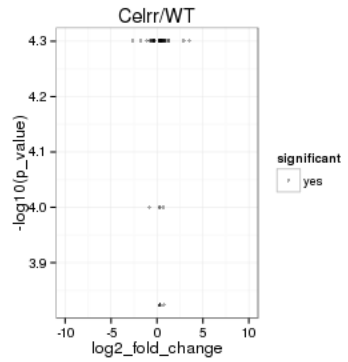

### FoldChange Heatmap

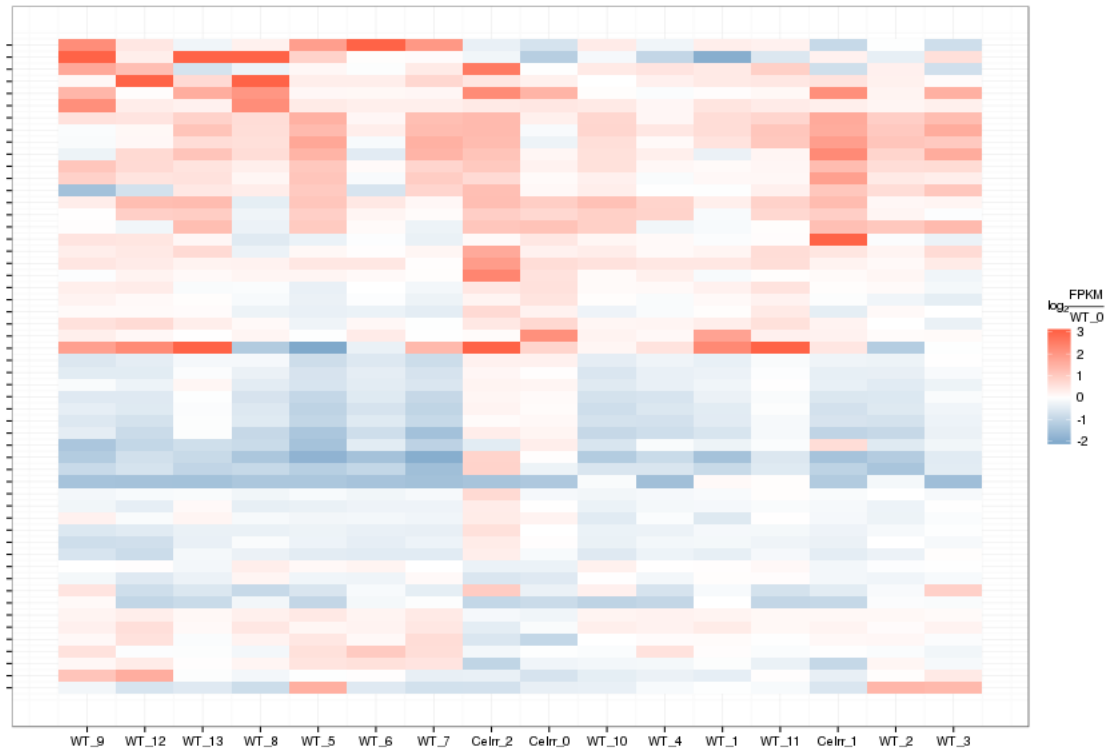

## Differential Splicing

### Differential Isoforms between conditions

Per isoform difference between conditions:

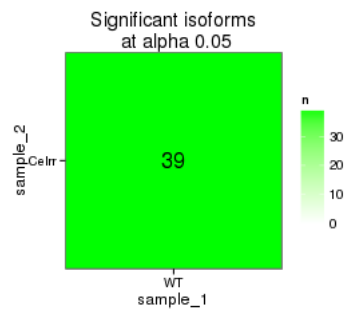

These isoforms are:

**isoAnnot\$gene\_short\_name**

- 1 Chordc1
- 2 Rec8
- 3 Hif3a
- 4 Nes
- 5 Dnajb1
- 6 Cyp2a5
- 7 Dio2
- 8 Btg2
- 9 Pdia6
  
- 10 Serpina3n
- 11 Fos
- 12 Fam107a
- 13 Arc
- 14 Sdf2l1
- 15 Nr4a1
- 16 Dusp1
- 17 Pdia4
- 18 Vcam1
- 19 Hddc3
- 20 Mt2
- 21 Mt1
- 22 Pllp
- 23 Ptgs2
- 24 Lars2
- 25 Gjb6
- 26 Gm9493
- 27 Cirbp
- 28 Npas4
- 29 Tmem252
- 30 Opalin
- 31 Pla2g4e
- 32 Zbtb40
- 33 Gm7292
- 34 Wdfy1
- 35 Hspa1b
- 36 Hspa1a
  
- 37 Neat1

Gene-level DE isoform heatmap



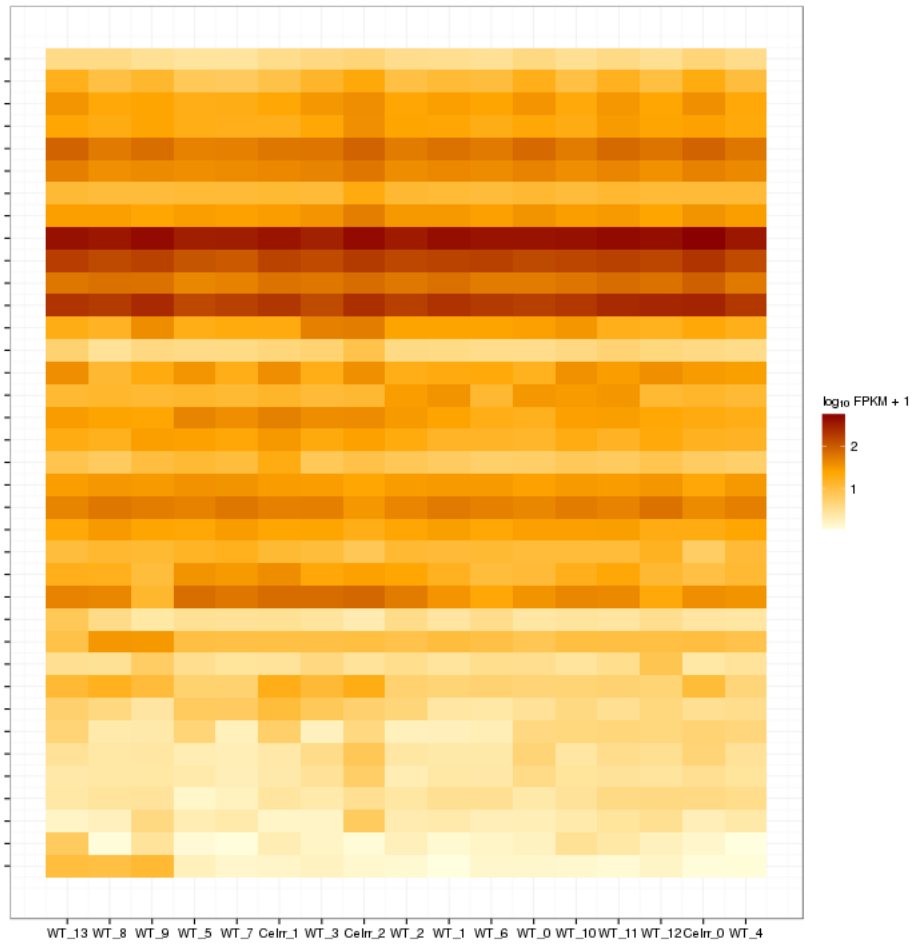

Isoform foldchange heatmap by isoform:

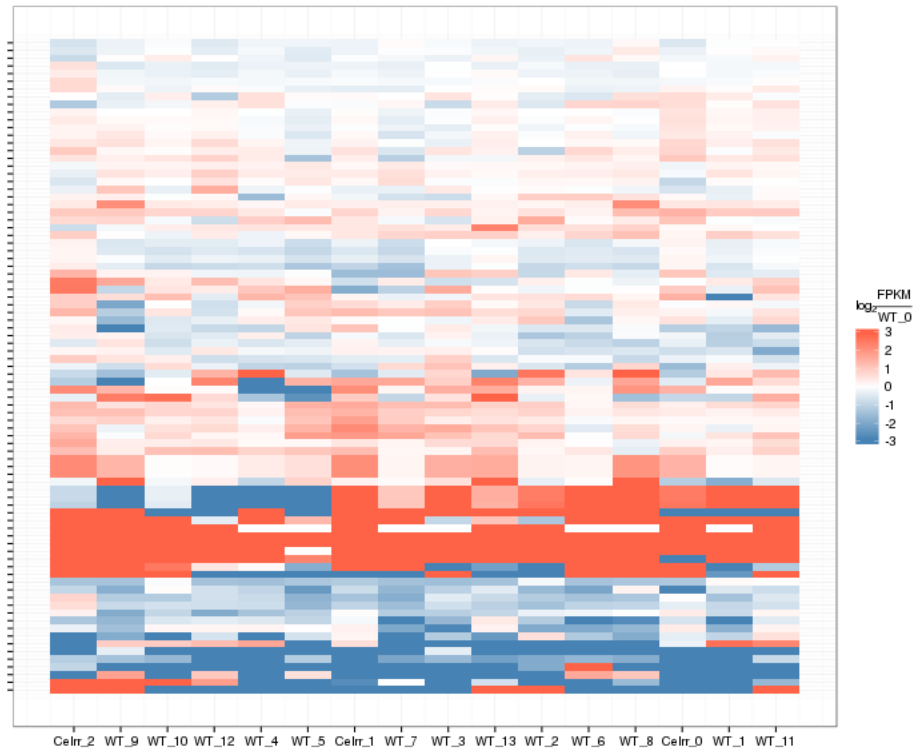

## Differential Splicing between conditions

(eval false for first pass)

Per condition differences in isoforms (Does gene have diff piechart between conditions?)

These genes are:

Splicing heatmap by isoform:

Splicing heatmap by gene

The following are significantly differentially spliced genes (relative portion of isoform per condition):

## Gene/Pathway Analysis

### GSEA

Enrichment and zscores are calculated based on expression in KO vs WT ( $\text{fpkmKO}/\text{fpkmWT}$ ), so genes that are down regulated in KO are shown in blue, while upregulation is shown in red.

KOWT Blue = down in KO Red = Up in KO

Biocarta enrichment:

```
## [1] "Not enough significant categories to print a heatmap!"
```

Biocarta zscore:

```
## [1] "Not enough significant categories to print a heatmap!"
```

Reactome enrichment:

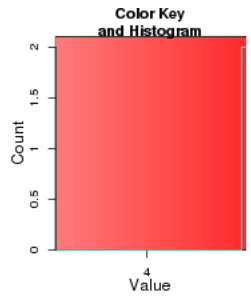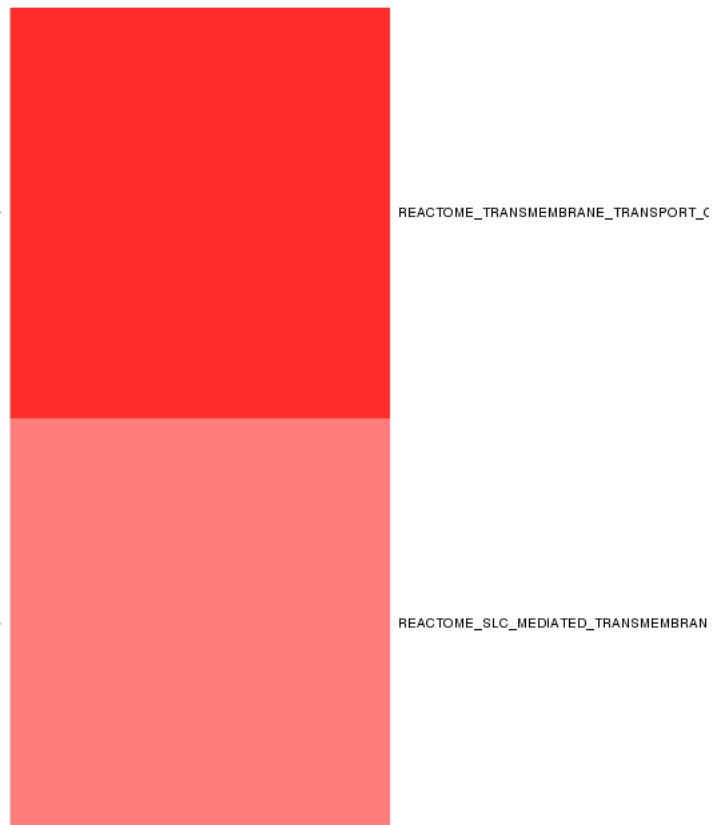

Reactome zscore:

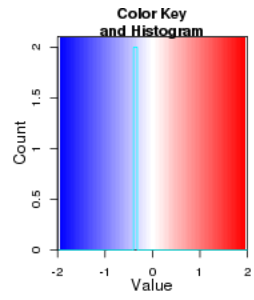

\_\_\_\_\_

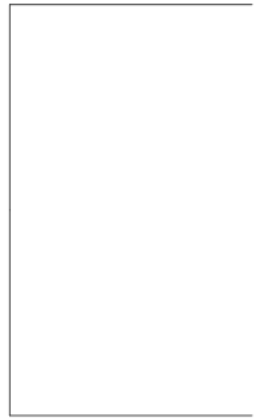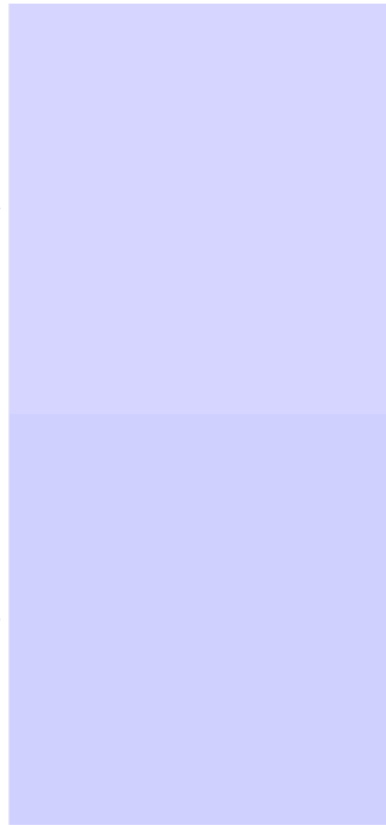

REACTOME\_TRANSMEMBRANE\_TRANSPORT\_C

REACTOME\_SLC\_MEDIATED\_TRANSMEMBRAN

Kegg enrichment:

## Error: argument is of length zero

Kegg zscore:

```
## Error: incorrect number of dimensions
```

```
## Error: object 'x_ordered' not found
```

```
## Error: error in evaluating the argument 'x' in selecting a method for function 'as.matrix': Error: object 'x_ordered' not found
```

```
## Error: object 'x_ordered' not found
```

Interneuron enrichment:

```
## Error: argument is of length zero
```

Interneuron zscore:

```
## Error: incorrect number of dimensions
```

```
## Error: object 'x_ordered' not found
```

```
## Error: error in evaluating the argument 'x' in selecting a method for function 'as.matrix': Error: object 'x_ordered' not found
```

```
## Error: object 'x_ordered' not found
```

Oncogene enrichment:

```
## [1] "Not enough significant categories to print a heatmap!"
```

Oncogene zscore:

```
## [1] "Not enough significant categories to print a heatmap!"
```

Immuno enrichment:

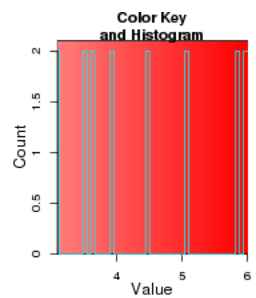

\_\_\_\_\_

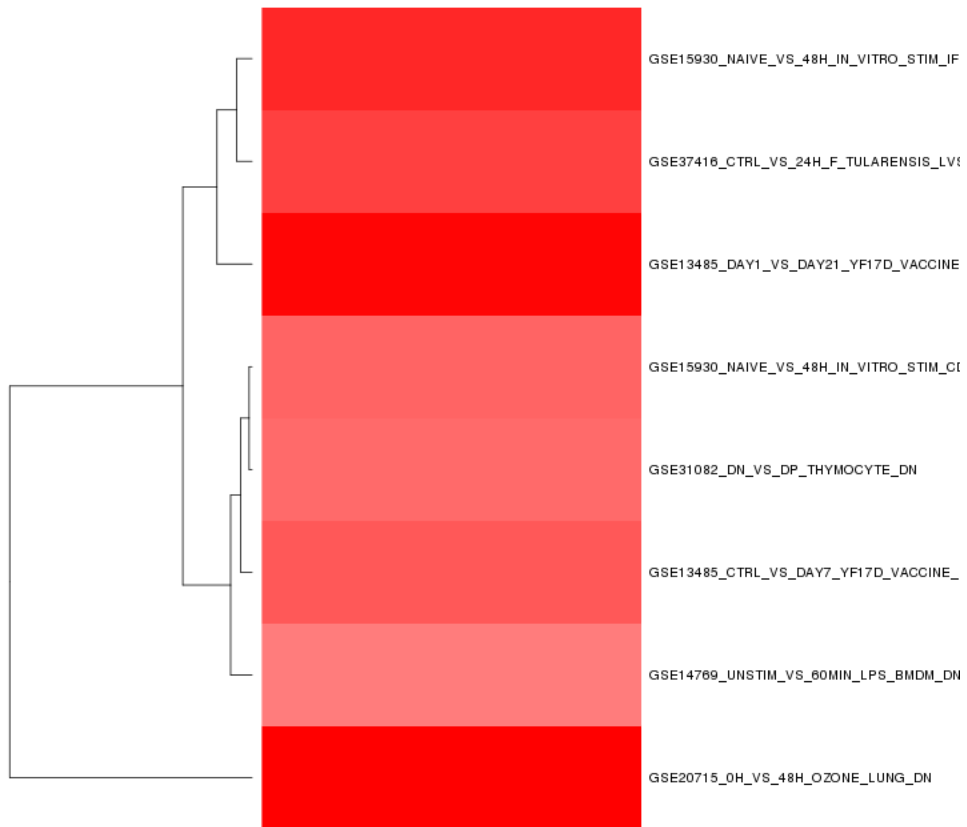

Immuno zscore:

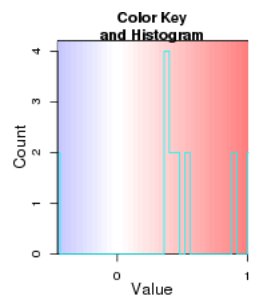

\_\_\_\_\_

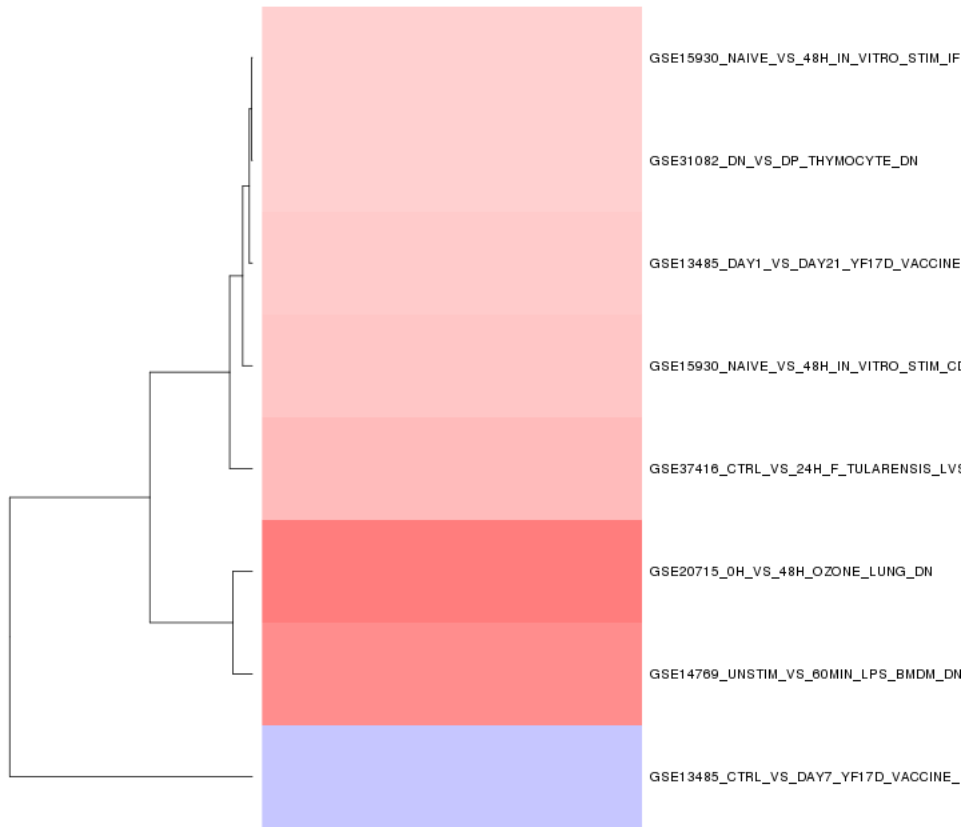

TF enrichment:

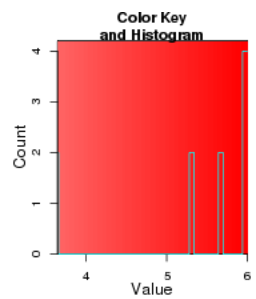

\_\_\_\_\_

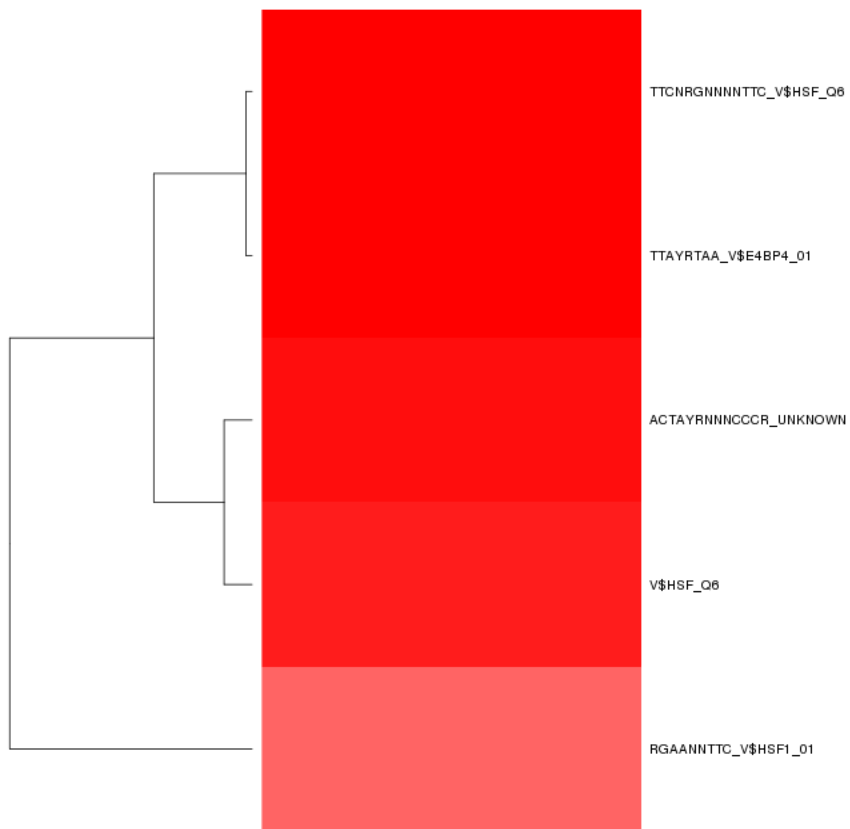

TF zscore:



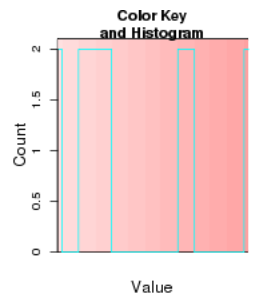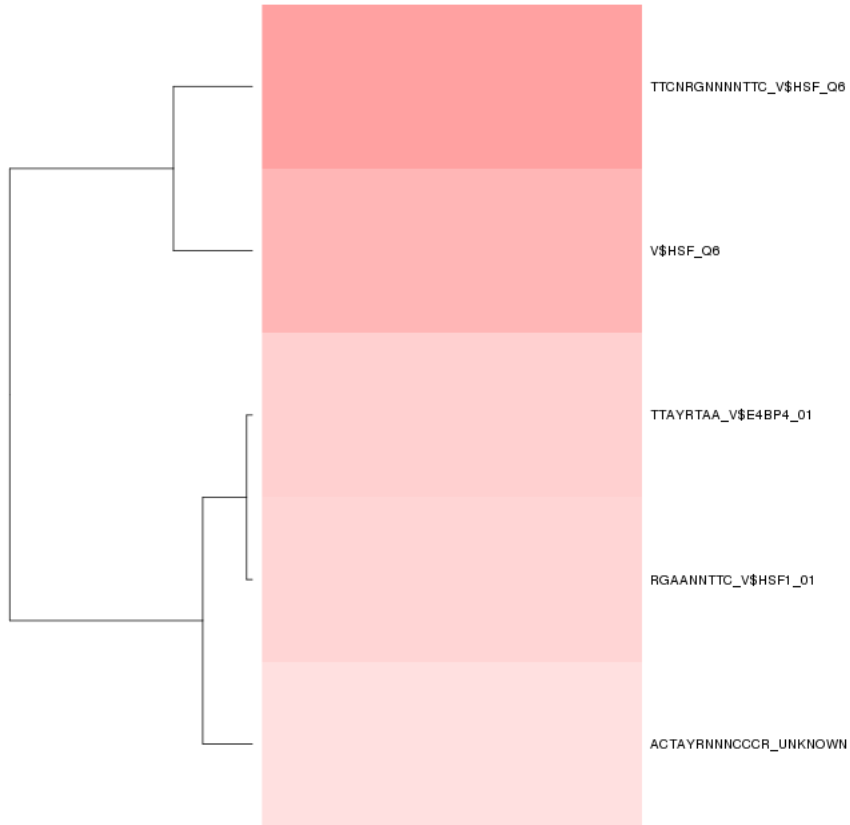

## GO enrichment

Cluster profiler used to call enrichments of significantly differentially regulated genes that map to Entrez IDs.

```
## [1] "ERROR: The estimated pi0 <= 0. Check that you have valid p-values or use another lambda method."
```

```
## [1] "ERROR: The estimated pi0 <= 0. Check that you have valid p-values or use another lambda method."
```

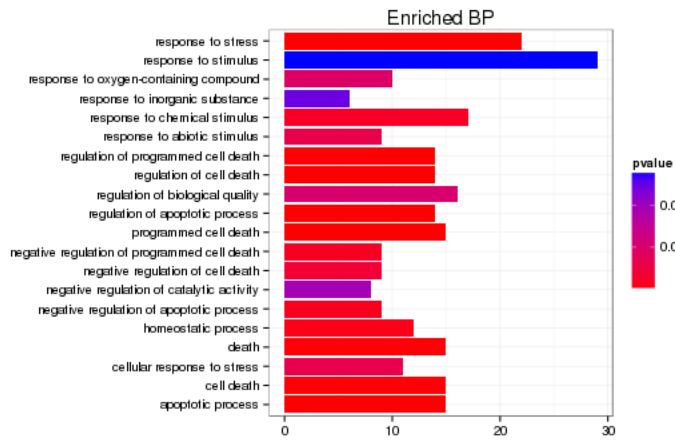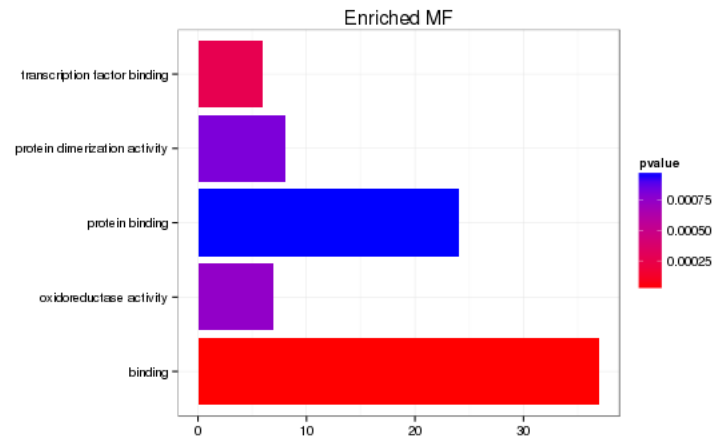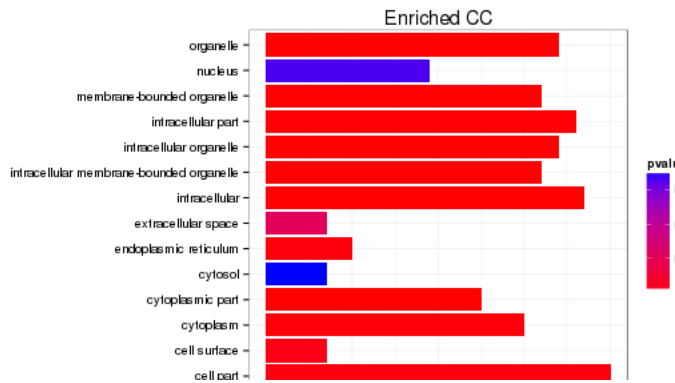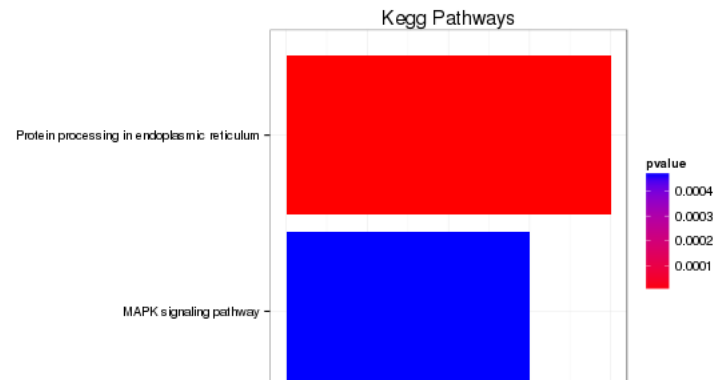

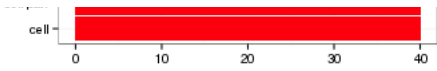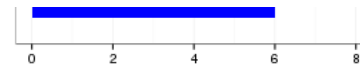

```
## Error: 'x' and 'units' must have length > 0
```

## Enrichment or depletion for stage-specific cell cycle markers

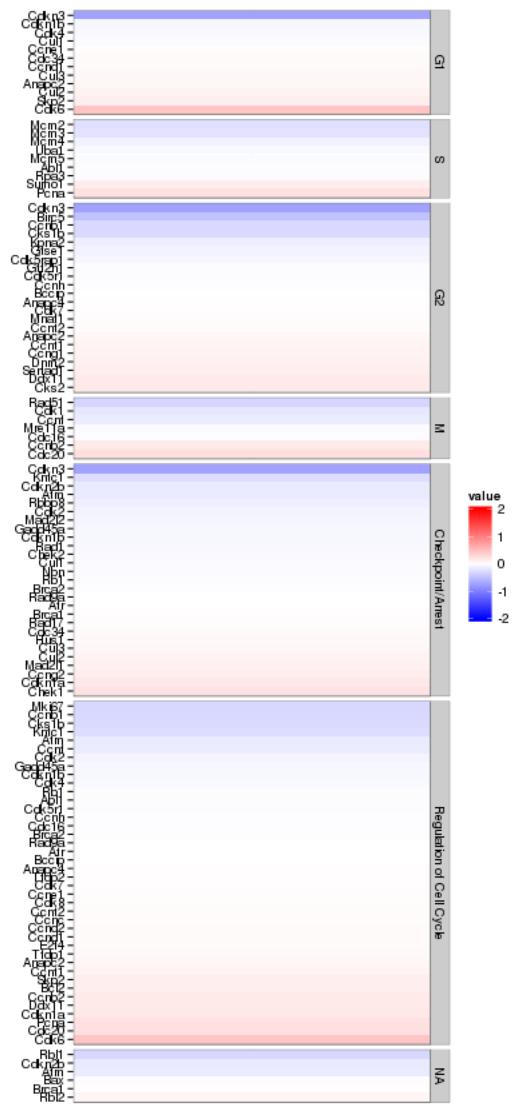

Enrichment or depletion for markers of specific cortical layers

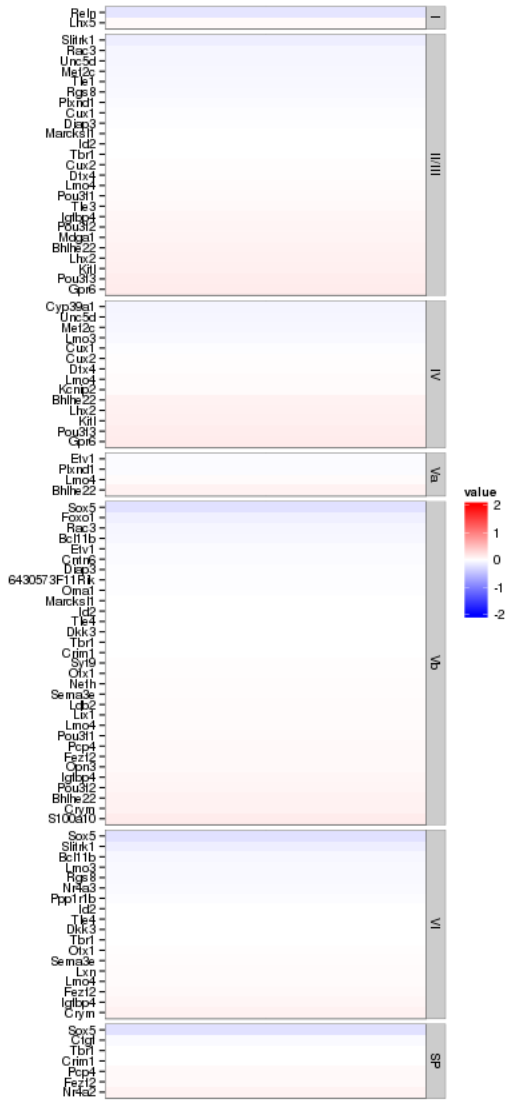

Enrichment or depletion for specific neural cell types

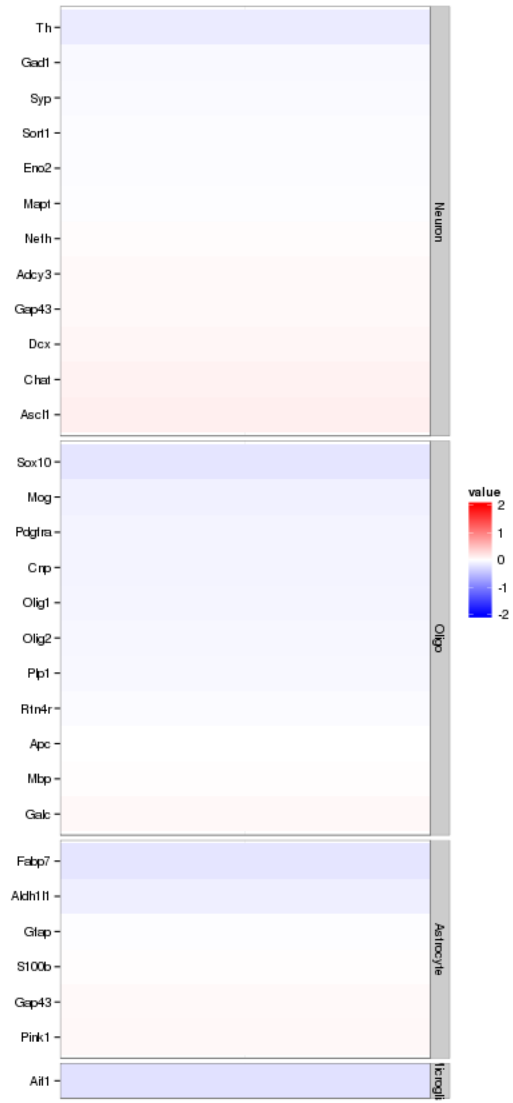

**Enrichment or Depletion of neural differentiation markers**

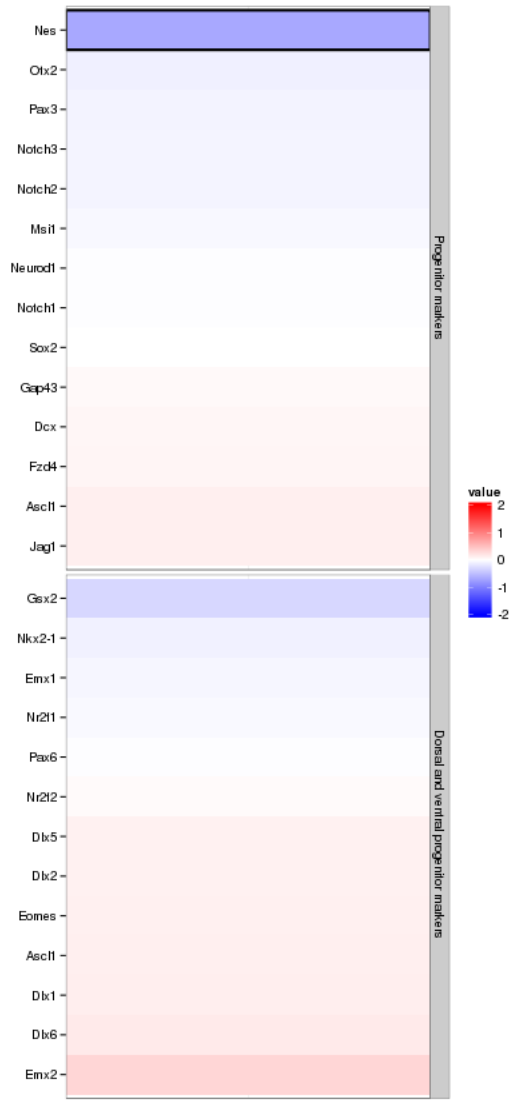

## Cis vs Trans (locally)

$\log_2$  Foldchange and test statistic are calculated with the ratio of  $\text{fpm(KO)}/\text{fpm(WT)}$ , thus the test\_stat is positive if a gene is higher in the KO and negative if a gene has lower expression in the KO

The pvalue for 0 genes significantly regulated in a region this size is: 1

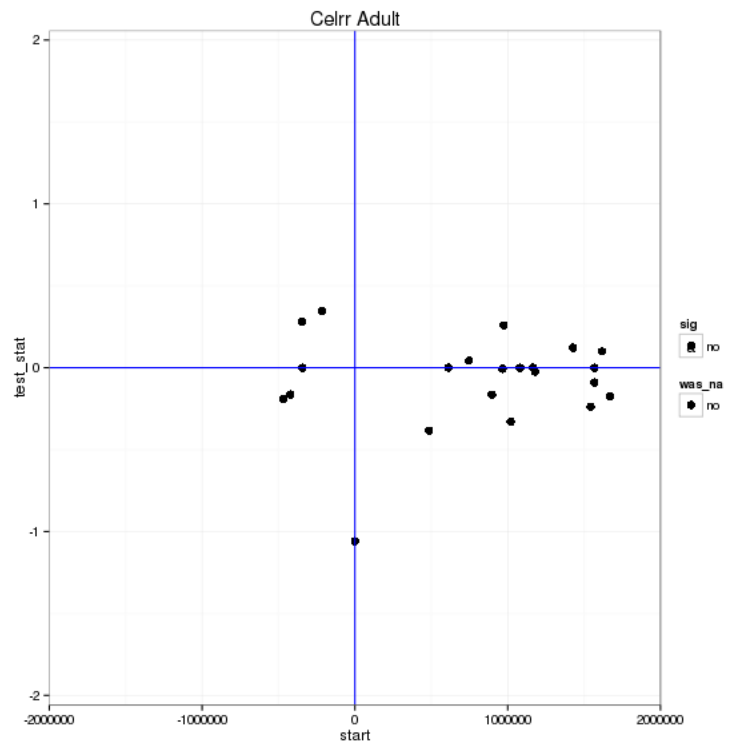

## Notes

Samples used are:

10

- 1 JR729
- 2 JR728
- 3 JR796
- 4 JR797
- 5 JR740
- 6 JR800
- 7 JR827
- 8 JR778
- 9 JR734
- 10 JR802
- 11 JR803
- 12 JR735
- 13 JR785
- 14 JR781



15 JR739  
16 JR783  
17 JR804

## Replicates

| file                                                                          | sample_name | replicate | rep_name | total_mass  | norm_mass   | internal_scale | external_scale |
|-------------------------------------------------------------------------------|-------------|-----------|----------|-------------|-------------|----------------|----------------|
| 1 /n/rinn_data1/seq/fgoff/Projects/BrainMap/data/quants/JR729/abundances.cxb  | WT          | 0         | WT_0     | 26334400.00 | 33868500.00 | 0.78           | 1.00           |
| 2 /n/rinn_data1/seq/fgoff/Projects/BrainMap/data/quants/JR728/abundances.cxb  | WT          | 1         | WT_1     | 20329200.00 | 33868500.00 | 0.60           | 1.00           |
| 3 /n/rinn_data1/seq/fgoff/Projects/BrainMap/data/quants/JR796/abundances.cxb  | WT          | 2         | WT_2     | 34089000.00 | 33868500.00 | 1.00           | 1.00           |
| 4 /n/rinn_data1/seq/fgoff/Projects/BrainMap/data/quants/JR797/abundances.cxb  | WT          | 3         | WT_3     | 28103300.00 | 33868500.00 | 0.82           | 1.00           |
| 5 /n/rinn_data1/seq/fgoff/Projects/BrainMap/data/quants/JR740/abundances.cxb  | WT          | 4         | WT_4     | 35808200.00 | 33868500.00 | 1.06           | 1.00           |
| 6 /n/rinn_data1/seq/fgoff/Projects/BrainMap/data/quants/JR800/abundances.cxb  | WT          | 5         | WT_5     | 37012200.00 | 33868500.00 | 1.10           | 1.00           |
| 7 /n/rinn_data1/seq/fgoff/Projects/BrainMap/data/quants/JR827/abundances.cxb  | WT          | 6         | WT_6     | 27786600.00 | 33868500.00 | 0.82           | 1.00           |
| 8 /n/rinn_data1/seq/fgoff/Projects/BrainMap/data/quants/JR778/abundances.cxb  | WT          | 7         | WT_7     | 39541900.00 | 33868500.00 | 1.18           | 1.00           |
| 9 /n/rinn_data1/seq/fgoff/Projects/BrainMap/data/quants/JR734/abundances.cxb  | WT          | 8         | WT_8     | 34480600.00 | 33868500.00 | 1.03           | 1.00           |
| 10 /n/rinn_data1/seq/fgoff/Projects/BrainMap/data/quants/JR802/abundances.cxb | WT          | 9         | WT_9     | 45467400.00 | 33868500.00 | 1.33           | 1.00           |
| 11 /n/rinn_data1/seq/fgoff/Projects/BrainMap/data/quants/JR803/abundances.cxb | WT          | 10        | WT_10    | 52130400.00 | 33868500.00 | 1.54           | 1.00           |
| 12 /n/rinn_data1/seq/fgoff/Projects/BrainMap/data/quants/JR735/abundances.cxb | WT          | 11        | WT_11    | 34994400.00 | 33868500.00 | 1.04           | 1.00           |
| 13 /n/rinn_data1/seq/fgoff/Projects/BrainMap/data/quants/JR785/abundances.cxb | WT          | 12        | WT_12    | 34173600.00 | 33868500.00 | 1.00           | 1.00           |
| 14 /n/rinn_data1/seq/fgoff/Projects/BrainMap/data/quants/JR781/abundances.cxb | WT          | 13        | WT_13    | 41538900.00 | 33868500.00 | 1.23           | 1.00           |
| 15 /n/rinn_data1/seq/fgoff/Projects/BrainMap/data/quants/JR739/abundances.cxb | Celrr       | 0         | Celrr_0  | 23325900.00 | 33868500.00 | 0.69           | 1.00           |
| 16 /n/rinn_data1/seq/fgoff/Projects/BrainMap/data/quants/JR783/abundances.cxb | Celrr       | 1         | Celrr_1  | 37161800.00 | 33868500.00 | 1.10           | 1.00           |
| 17 /n/rinn_data1/seq/fgoff/Projects/BrainMap/data/quants/JR804/abundances.cxb | Celrr       | 2         | Celrr_2  | 39715300.00 | 33868500.00 | 1.16           | 1.00           |

## Session Info

```
## R version 3.0.2 (2013-09-25)
## Platform: x86_64-unknown-linux-gnu (64-bit)
##
## locale:
## [1] LC_CTYPE=en_US.UTF-8      LC_NUMERIC=C
## [3] LC_TIME=en_US.UTF-8      LC_COLLATE=en_US.UTF-8
## [5] LC_MONETARY=en_US.UTF-8  LC_MESSAGES=en_US.UTF-8
## [7] LC_PAPER=en_US.UTF-8     LC_NAME=C
## [9] LC_ADDRESS=C             LC_TELEPHONE=C
## [11] LC_MEASUREMENT=en_US.UTF-8 LC_IDENTIFICATION=C
##
## attached base packages:
## [1] grid      parallel  methods  stats    graphics  grDevices  utils
## [8] datasets  base
##
## other attached packages:
## [1] plyr_1.8.1
## [2] stringr_0.6.2
## [3] seqbias_1.10.0
```

```

## [4] BSgenome.Mmusculus.UCSC.mm10_1.3.19
## [5] BSgenome_1.30.0
## [6] Biostrings_2.30.1
## [7] gdata_2.13.3
## [8] GO.db_2.10.1
## [9] org.Mm.eg.db_2.10.1
## [10] clusterProfiler_1.13.1
## [11] DOSE_2.0.0
## [12] ReactomePA_1.6.1
## [13] AnnotationDbi_1.24.0
## [14] Biobase_2.22.0
## [15] mgcv_1.7-29
## [16] nlme_3.1-117
## [17] RMySQL_0.9-3
## [18] RColorBrewer_1.0-5
## [19] gridExtra_0.9.1
## [20] gtable_0.1.2
## [21] marray_1.40.0
## [22] gplots_2.13.0
## [23] GSA_1.03
## [24] limma_3.18.13
## [25] xtable_1.7-3
## [26] cummeRbund_2.7.2
## [27] Gviz_1.6.0
## [28] rtracklayer_1.22.7
## [29] GenomicRanges_1.14.4
## [30] XVector_0.2.0
## [31] IRanges_1.20.7
## [32] fastcluster_1.1.13
## [33] reshape2_1.4
## [34] ggplot2_1.0.0
## [35] RSQLite_0.11.4
## [36] DBI_0.2-7
## [37] BiocGenerics_0.8.0
## [38] knitr_1.6
##
## loaded via a namespace (and not attached):
## [1] biomaRt_2.18.0      biovizBase_1.10.8   bitops_1.0-6
## [4] caTools_1.17        cluster_1.15.2      colorspace_1.2-4
## [7] dichromat_2.0-0     digest_0.6.4        DO.db_2.7
## [10] evaluate_0.5.5      formatR_0.10        Formula_1.1-1
## [13] GenomicFeatures_1.14.5 GOSemSim_1.20.3     graph_1.40.1
## [16] graphite_1.8.1      gtools_3.4.1        Hmisc_3.14-4
## [19] igraph_0.7.1        KEGG.db_2.10.1      KernSmooth_2.23-12
## [22] labeling_0.2        lattice_0.20-29     latticeExtra_0.6-26
## [25] MASS_7.3-33         Matrix_1.1-3        munsell_0.4.2
## [28] org.Hs.eg.db_2.10.1 proto_0.3-10        qvalue_1.36.0
## [31] Rcpp_0.11.2         RCurl_1.95-4.1      reactome.db_1.46.1
## [34] Rsamtools_1.14.3    scales_0.2.4        splines_3.0.2
## [37] stats4_3.0.2        survival_2.37-7     tcltk_3.0.2
## [40] tools_3.0.2         XML_3.98-1.1        zlibbioc_1.8.0

```

## Run Info

```
##          param
## 1      cmd_line
## 2          version
## 3  SVN_revision
## 4  boost_version
## 5          genome
##
## 1 cuffdiff -p 10 -L WT,Celrr -o /n/rinn_data1/seq/lgoff/Projects/BrainMap/data/diffs/Celrr_vs_WT_Adult /n/rinn_data1/seq/lgoff/Projects/BrainMap/data/ar
## 2
## 3
## 4
## 5
```

# Celrr KO vs WT (Embryonic)

This file shows the wt-v-ko comparison for Celrr.

Cuff overview:

```
## CuffSet instance with:  
## 2 samples  
## 26754 genes  
## 77524 isoforms  
## 0 TSS  
## 23066 CDS  
## 0 promoters  
## 0 splicing  
## 19954 relCDS
```

## QC

### Dispersion

Dispersion plot for genes in cuff: (Overdispersion can lead to innacurate quants)

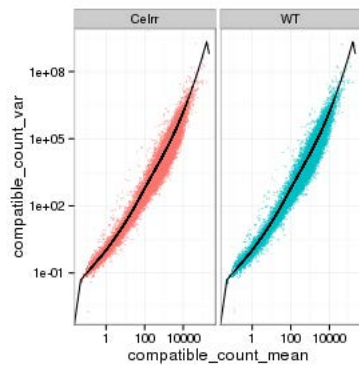

### Cross-replicate variability (fpkmSCVplot)

Differences in CV 2 can result in lower numbers of differentially expressed genes due to a higher degree of variability between replicate fpkm estimates.

Genes:

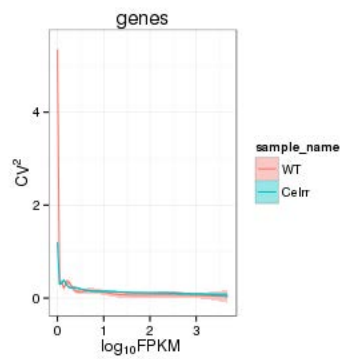

Isoforms:

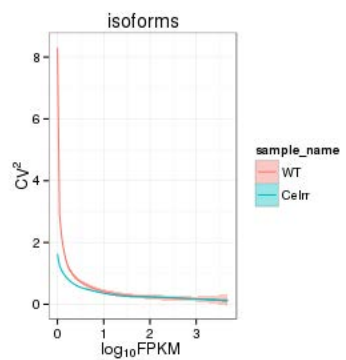

## MvA plot

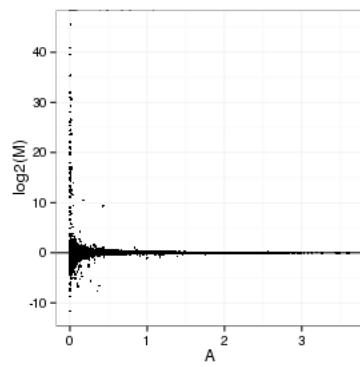

MvA plot counts

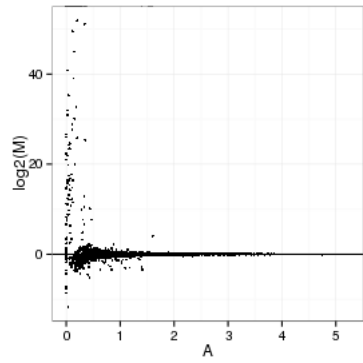

## Scatterplot matrix

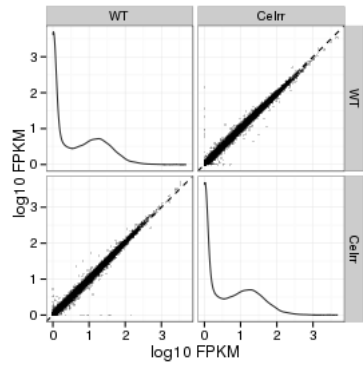

## Distributions

### Boxplots

Boxplot (genes)

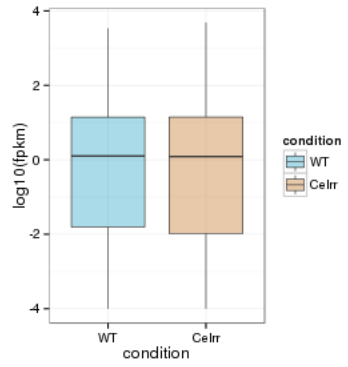

Boxplot (genes, replicates)

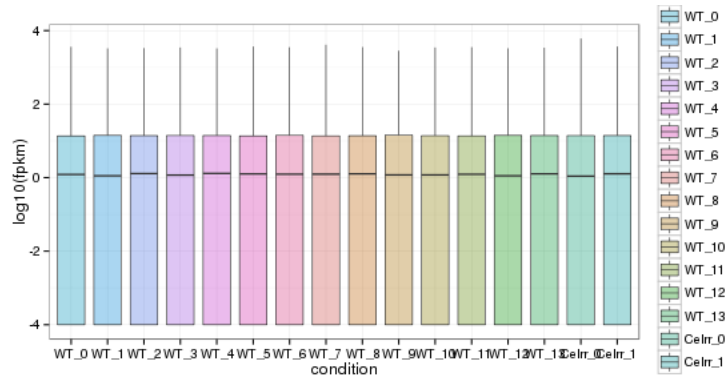

Boxplot (isoforms)

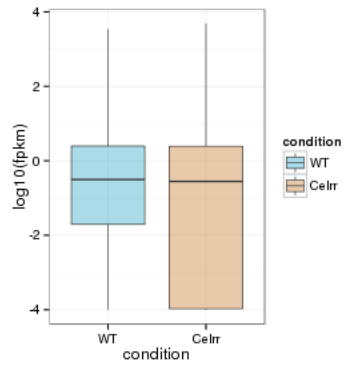

Boxplot (isoforms, replicates)

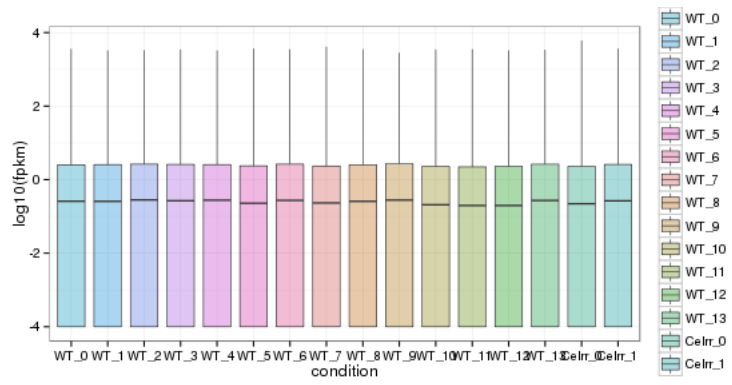

## Density

Density (genes)

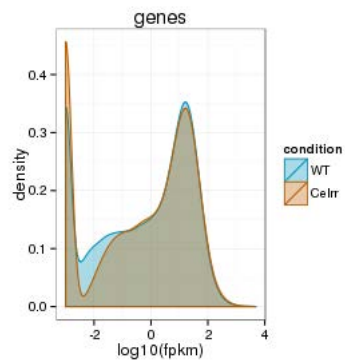

Density (genes, replicates)

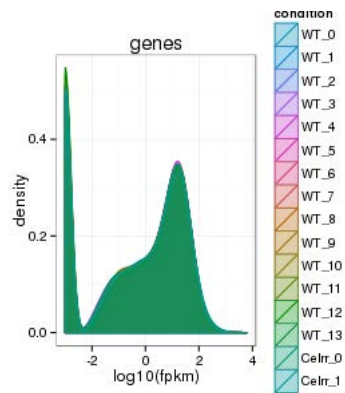



# Clustering

## Replicate Clusters

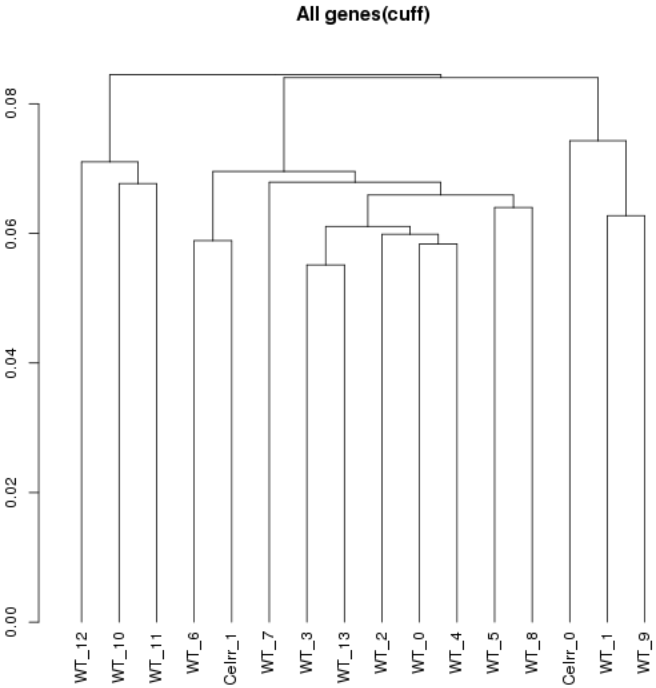

## NULL

## PCA (genes)

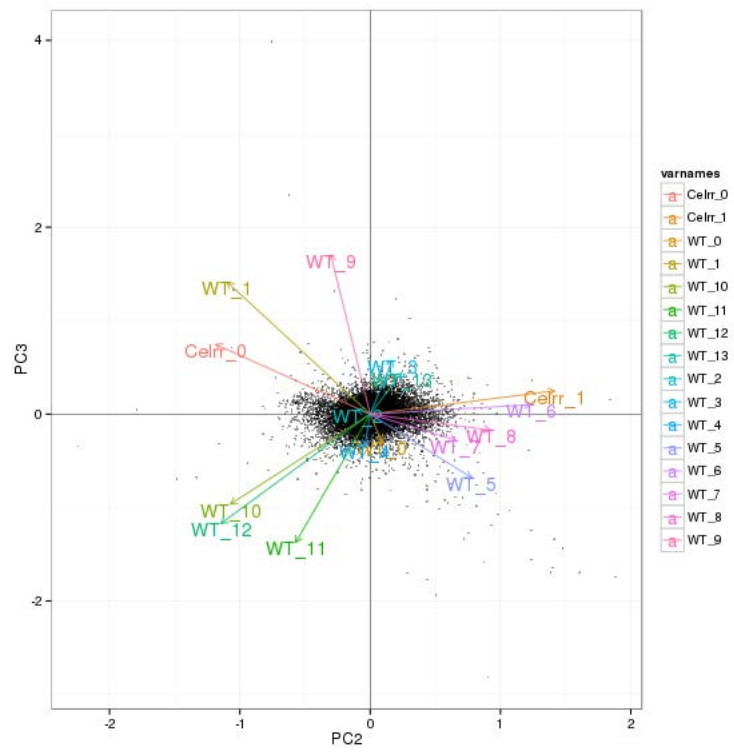

**MDS (genes)**

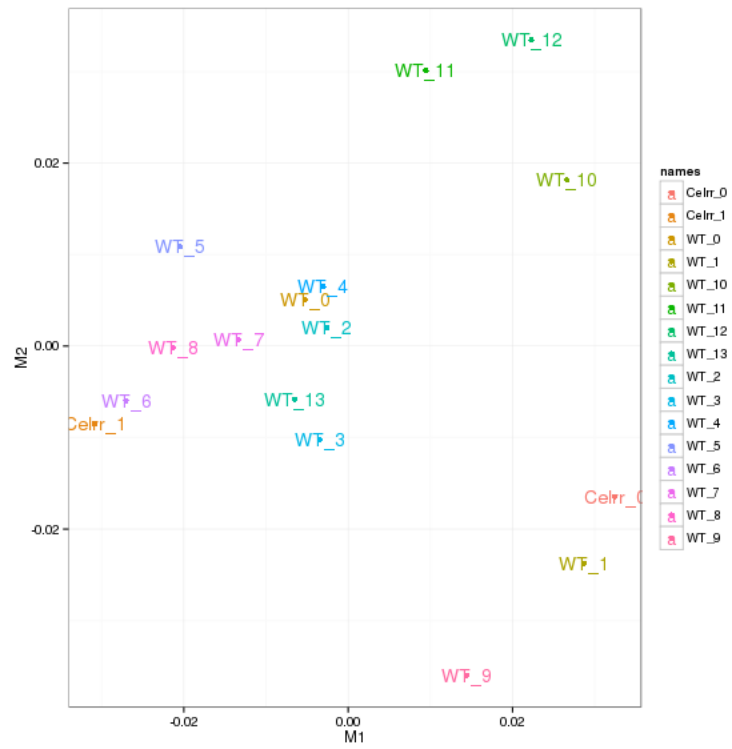

## KO assessment

Endogenous lncRNA expression

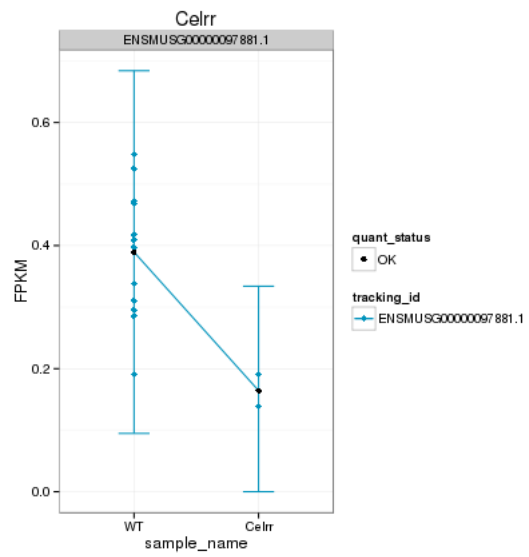

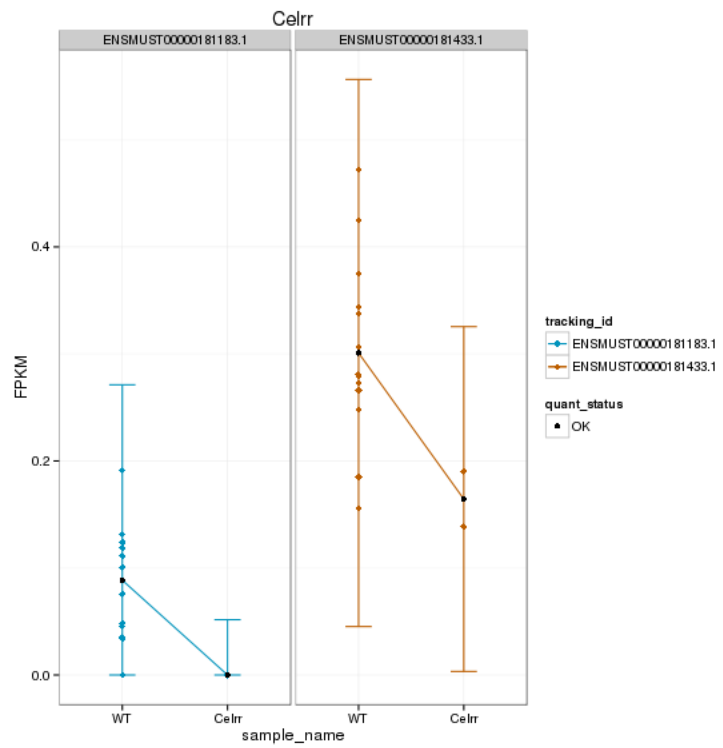

Barplot of gene expression:

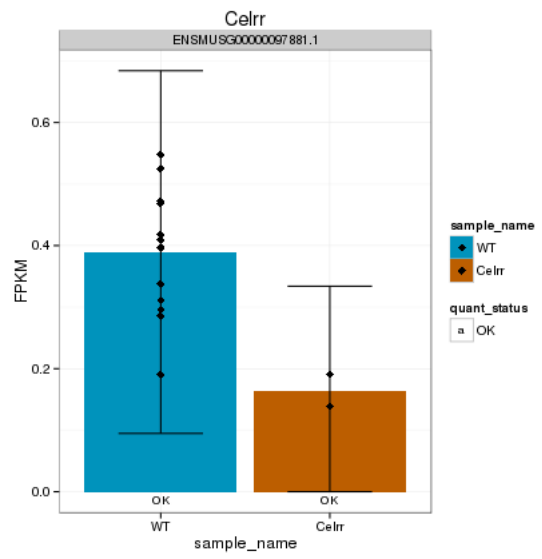

Barplot of isoform expression:

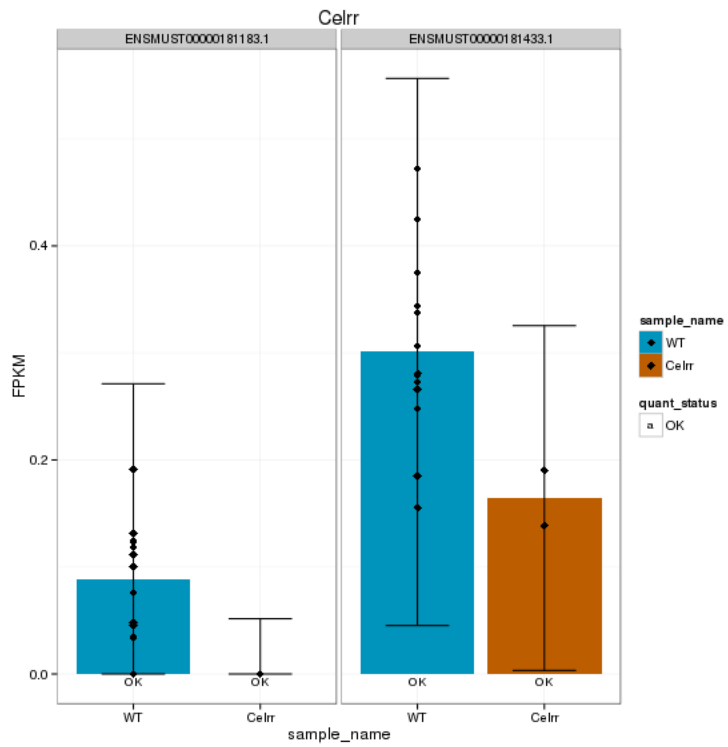

## LacZ expression

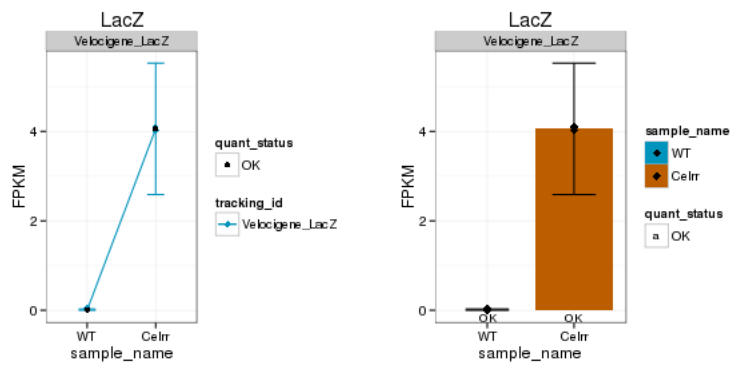

## Digital Genotyping (LacZ vs Endogenous lincRNA and Sex)

Eif2s3y is a y-expressed gene, Xist is an x-expressed gene Expression plot (endogenous linc, lacZ, Y-expressed gene):

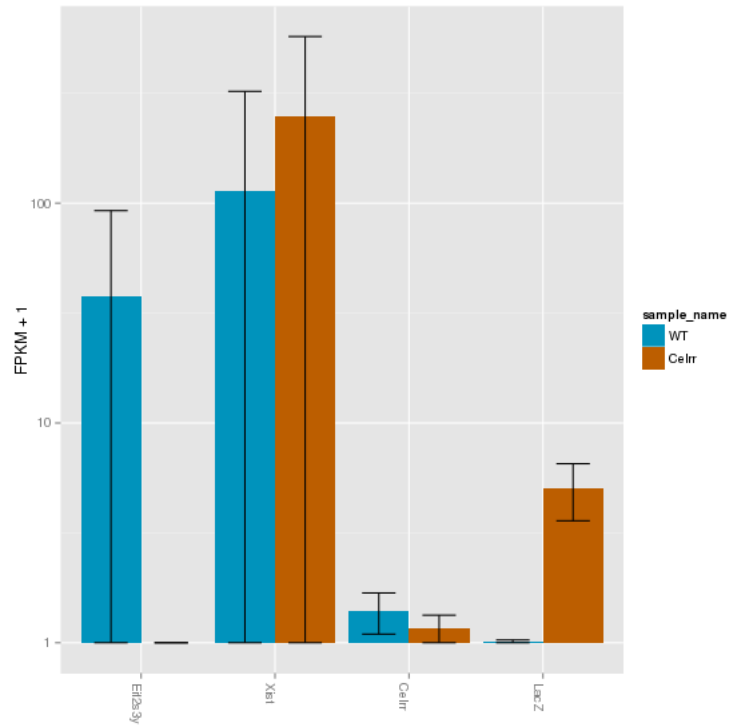

Expression heatmap:

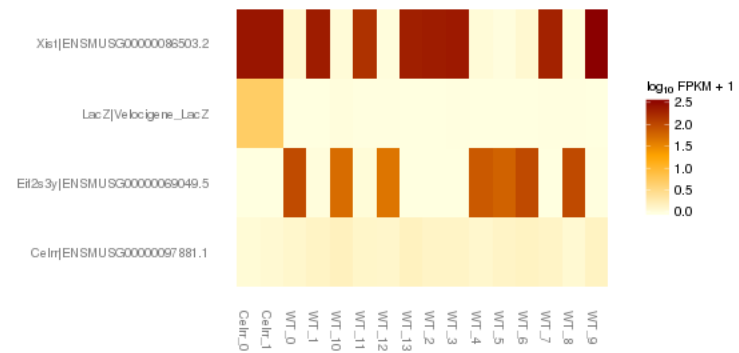

Track visualization

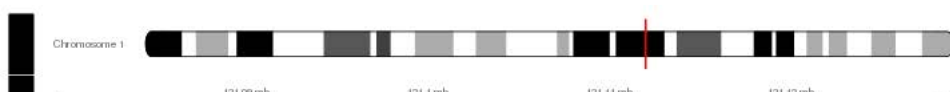



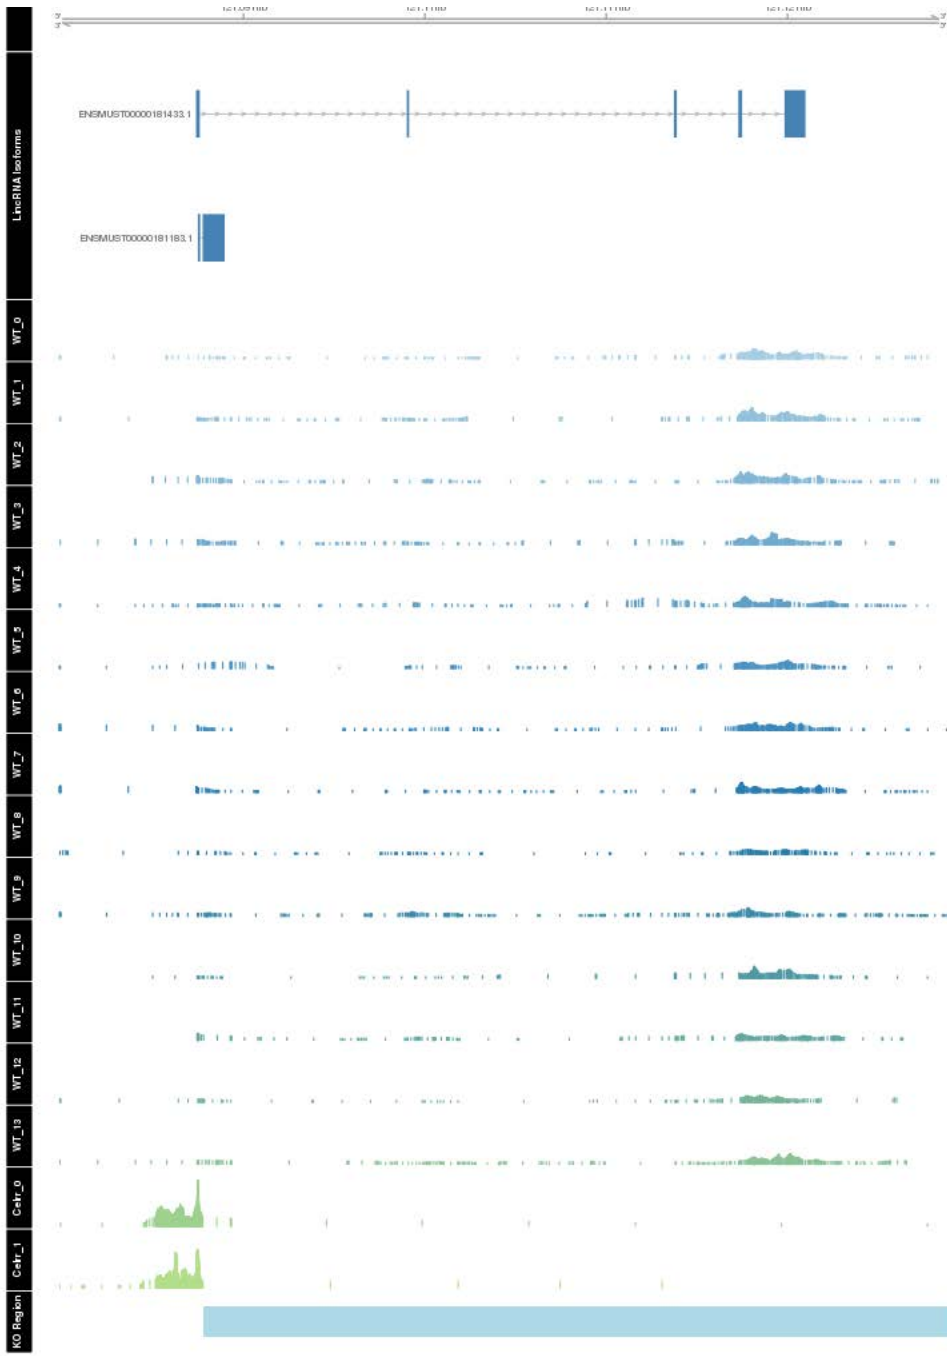

# Differential Analysis

## Differential Genes

There are 39 significantly differentially expressed genes. They are:

### geneAnnot\$gene\_short\_name

- 1 Mef2c
- 2 Phox2b
- 3 Sulf1
- 4 Slc16a10
- 5 Fam49a
- 6 Ntn1
- 7 Cxcl14
- 8 Sla
- 9 Clic6
- 10 Rps14
- 11 Fn1
- 12 Notch1
- 13 Notch2
- 14 Dync1i1
- 15 Dbx1
- 16 Slit2
- 17 Robo3
- 18 Lama1
- 19 Kirrel2
- 20 Neurod6
- 21 Notch3
- 22 Spon1
- 23 Satb2
- 24 Mpped1
- 25 Tuba1c
- 26 Cnpy1
- 27 Hbb-y
- 28 Krt15
- 29 Hba-x
- 30 Rpl32
- 31 Rpl26
- 32 Rps7
- 33 Rpl35
- 34 Cyp26b1
- 35 Ddx3y
- 36 Fat1
- 37 Rpl23

38 Rpl39

39 AA465934

## Matrix of gene significant differences between conditions

(skip for Brainmap wt-v-ko comparisons)

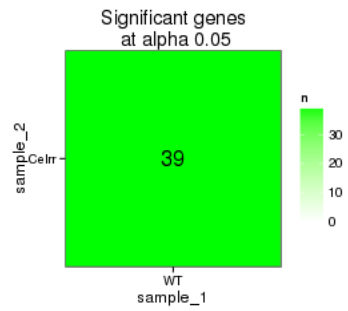

## Significant gene expression differences between conditions

Expression plot (genes):(turned off)

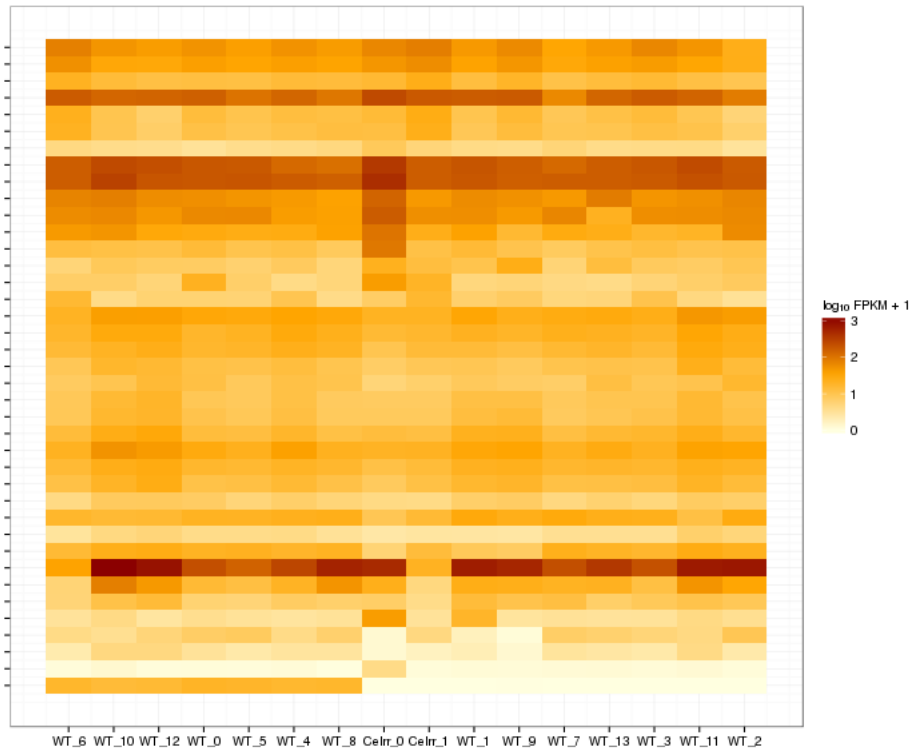

Significant genes with expression >50fpkm (any condition):(turned off)

An individual look at each of the highly expressed significantly differentially regulated genes: (eval=false for first pass)

### Expression-level/significance relationship

Scatter plot of significant genes only:

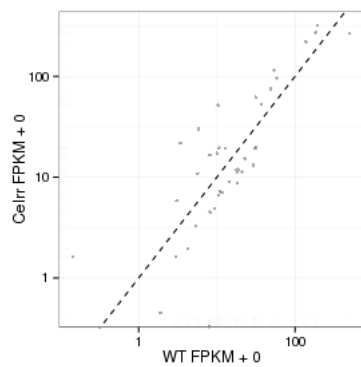

### Volcano Plot

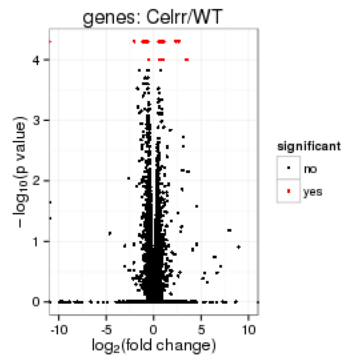

### Volcano plot with significant genes only:

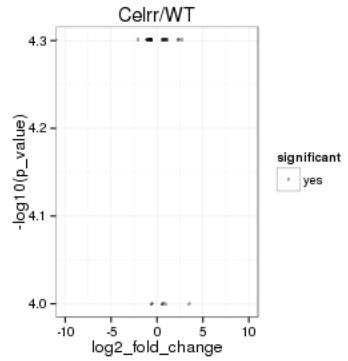

### FoldChange Heatmap

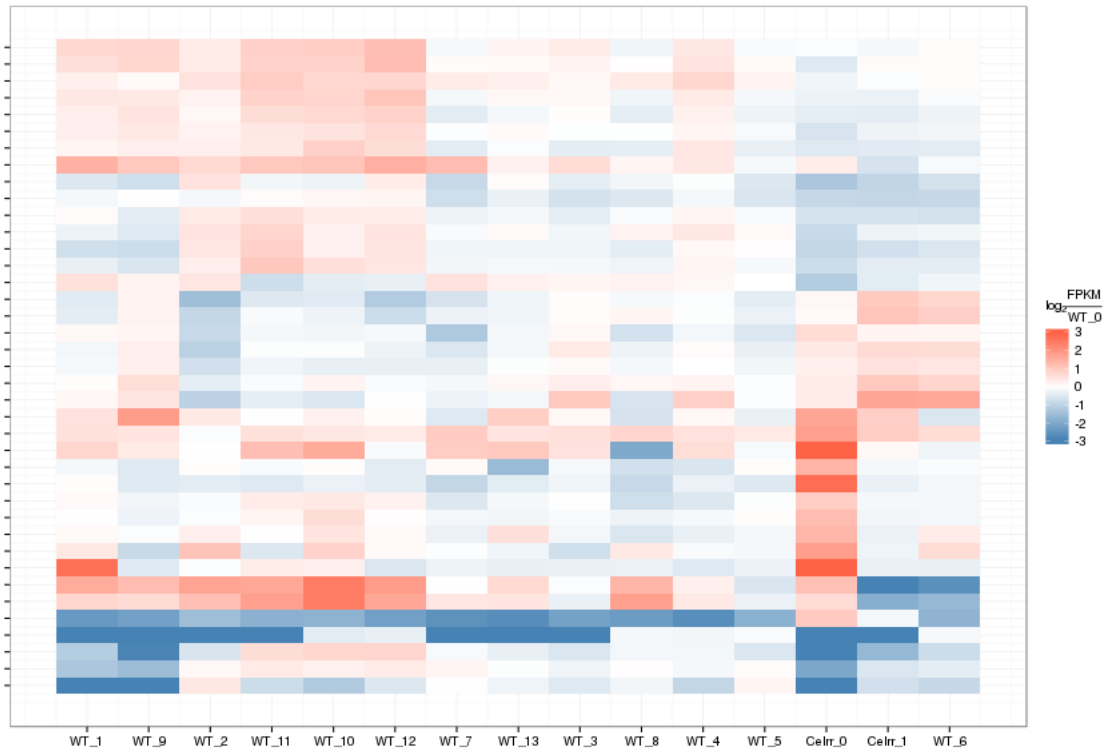

## Differential Splicing

### Differential Isoforms between conditions

Per isoform difference between conditions:

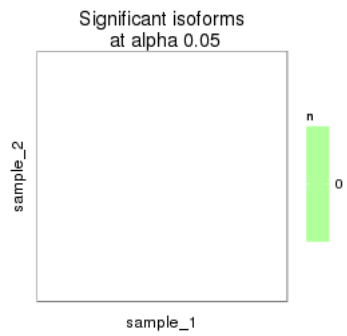

These isoforms are:

[1] "no sig isoforms"

Gene-level DE isoform heatmap

```
## [1] "no sig isoforms"
```

Isoform foldchange heatmap by isoform:

```
## [1] "no sig isoforms"
```

## Differential Splicing between conditions

(eval false for first pass)

Per condition differences in isoforms (Does gene have diff piechart between conditions?)

These genes are:

Splicing heatmap by isoform:

Splicing heatmap by gene

The following are significantly differentially spliced genes (relative portion of isoform per condition):

# Gene/Pathway Analysis

## GSEA

Enrichment and zscores are calculated based on expression in KO vs WT ( $\text{fpkmKO}/\text{fpkmWT}$ ), so genes that are down regulated in KO are shown in blue, while upregulation is shown in red.

KOWT Blue = down in KO Red = Up in KO

Biocarta enrichment:

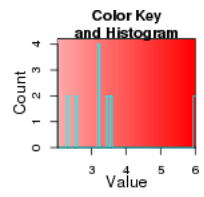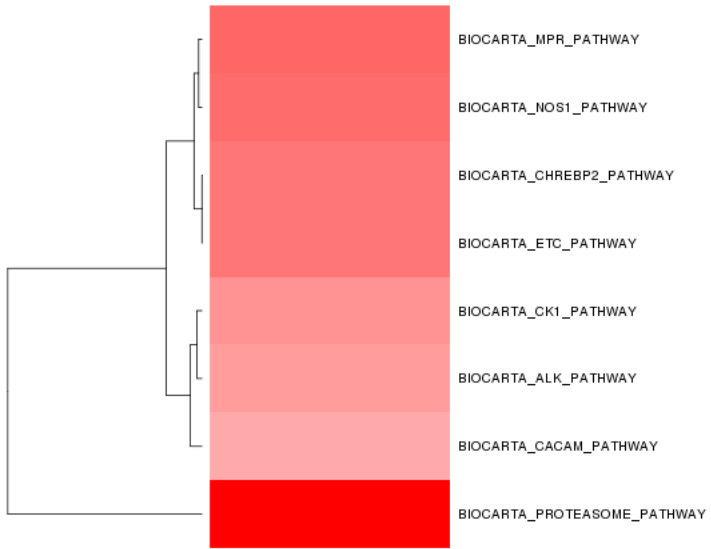

Biocarta zscore:



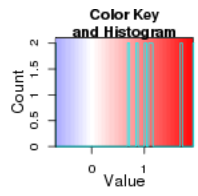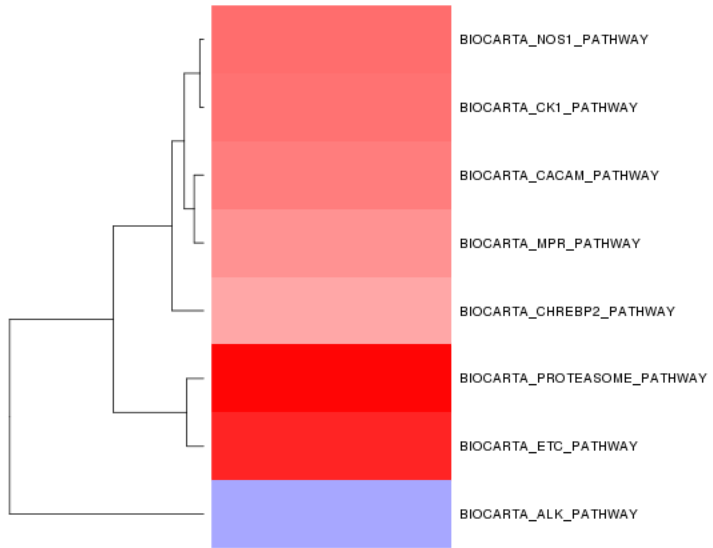

Reactome enrichment:

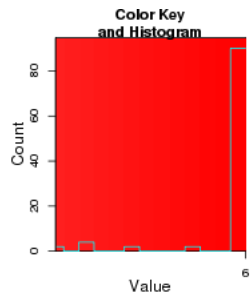

\_\_\_\_\_

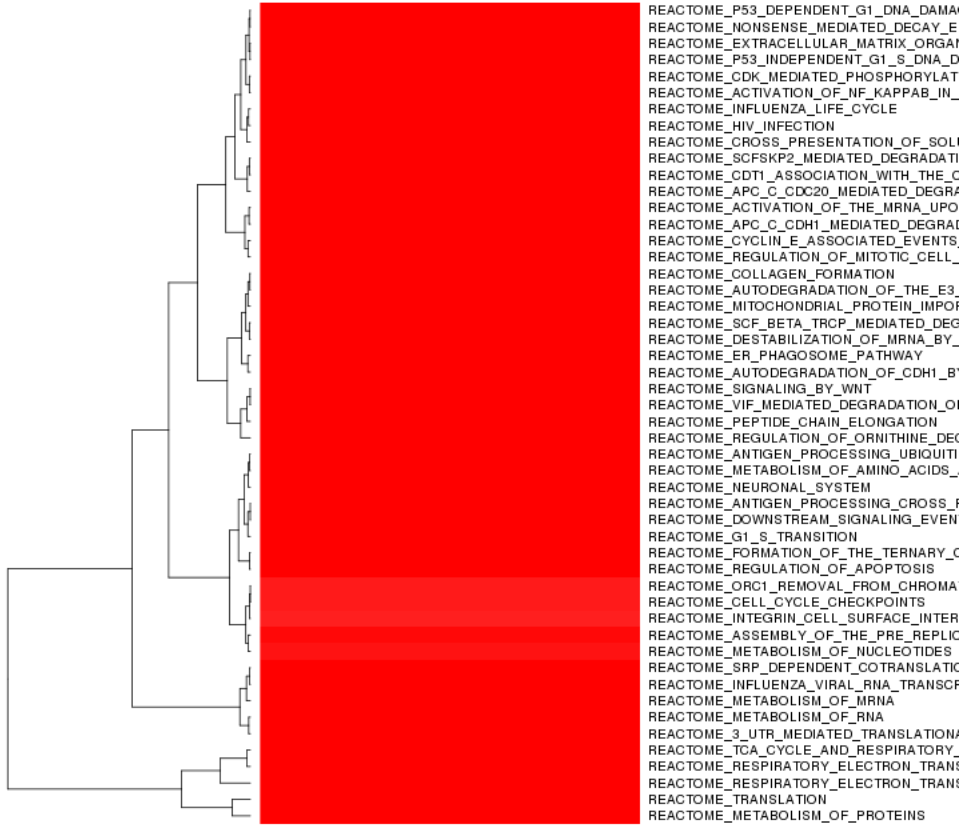

Reactome zscore:

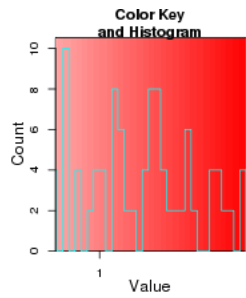

\_\_\_\_\_

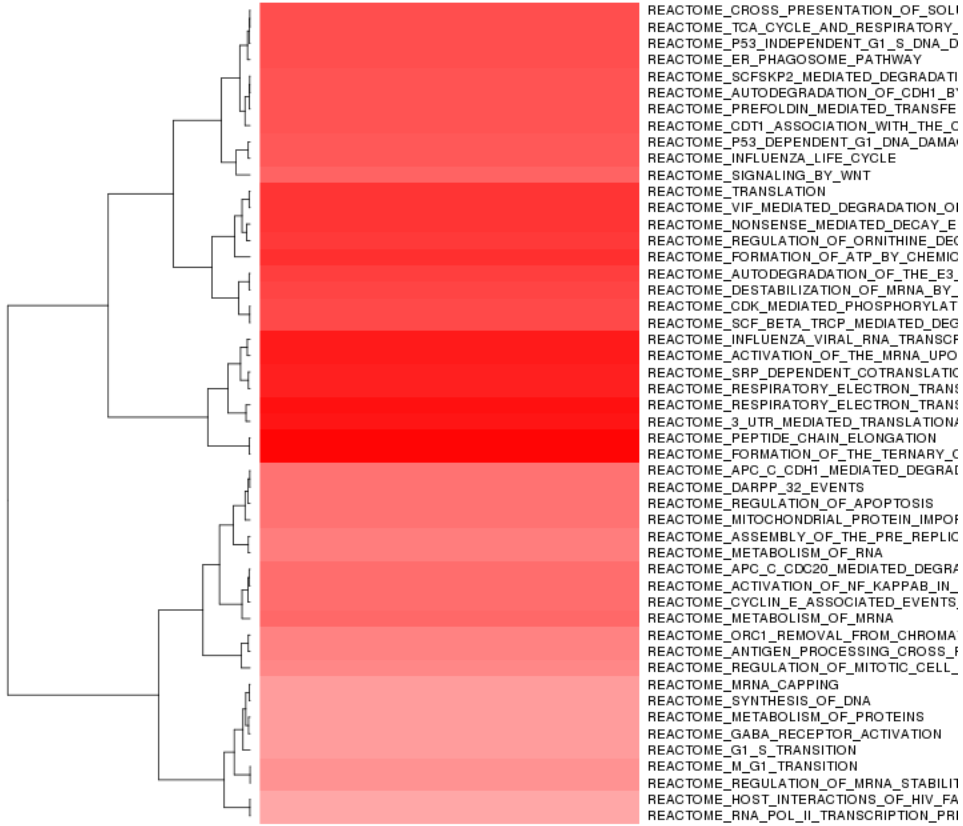

Kegg enrichment:

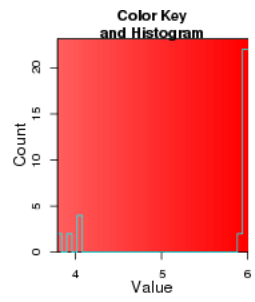

\_\_\_\_\_

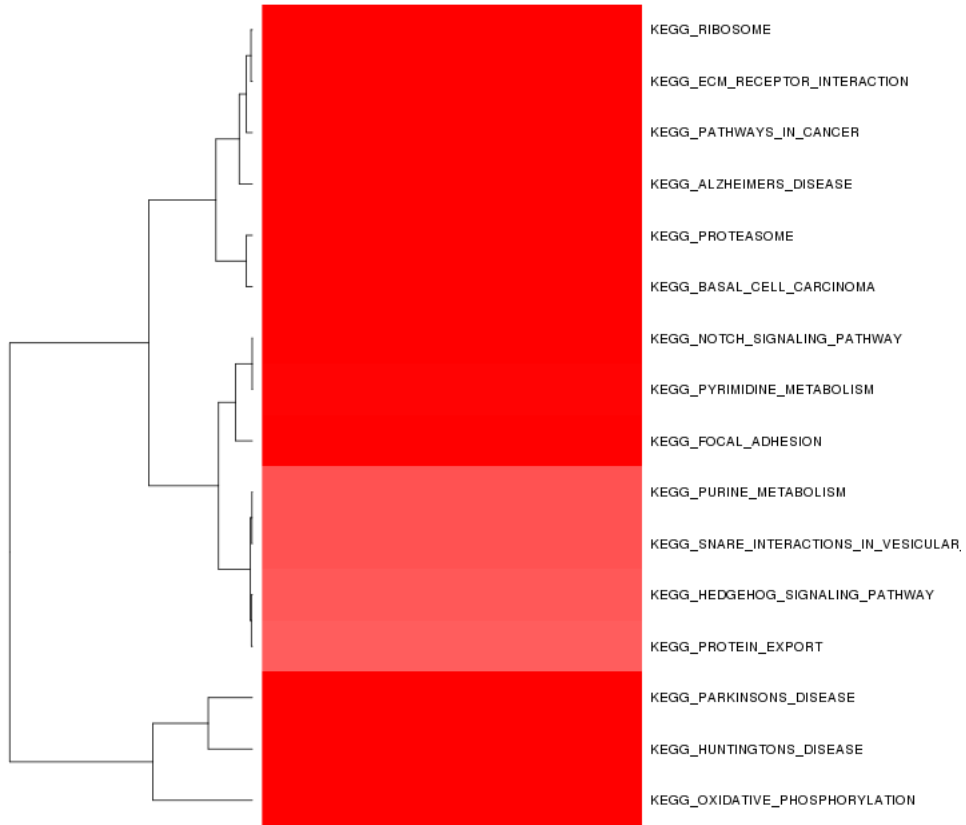

Kegg zscore:

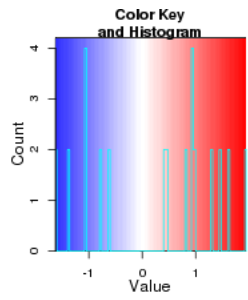

\_\_\_\_\_

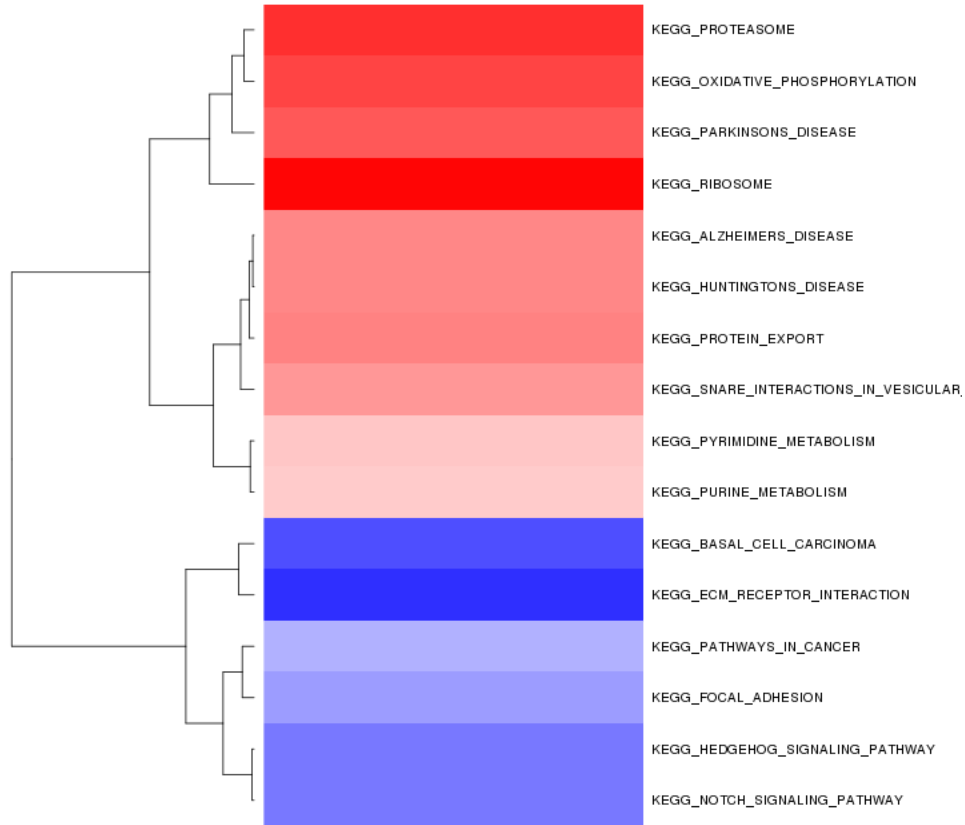

Interneuron enrichment:

## Error: no locations are finite

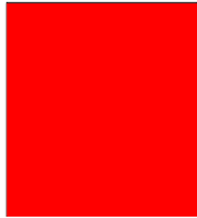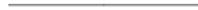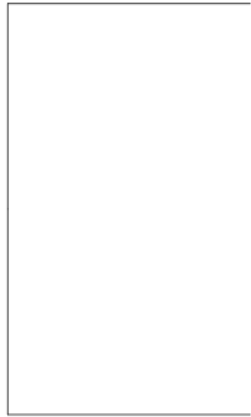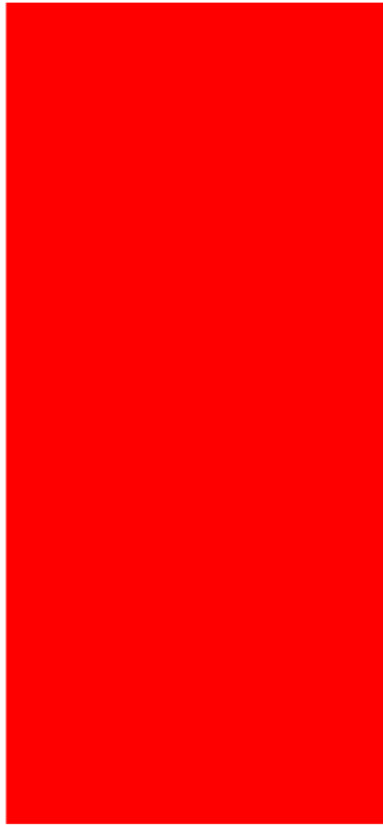

Lhx6\_genes

5HT\_genes

Interneuron zscore:

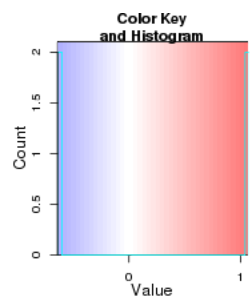

\_\_\_\_\_

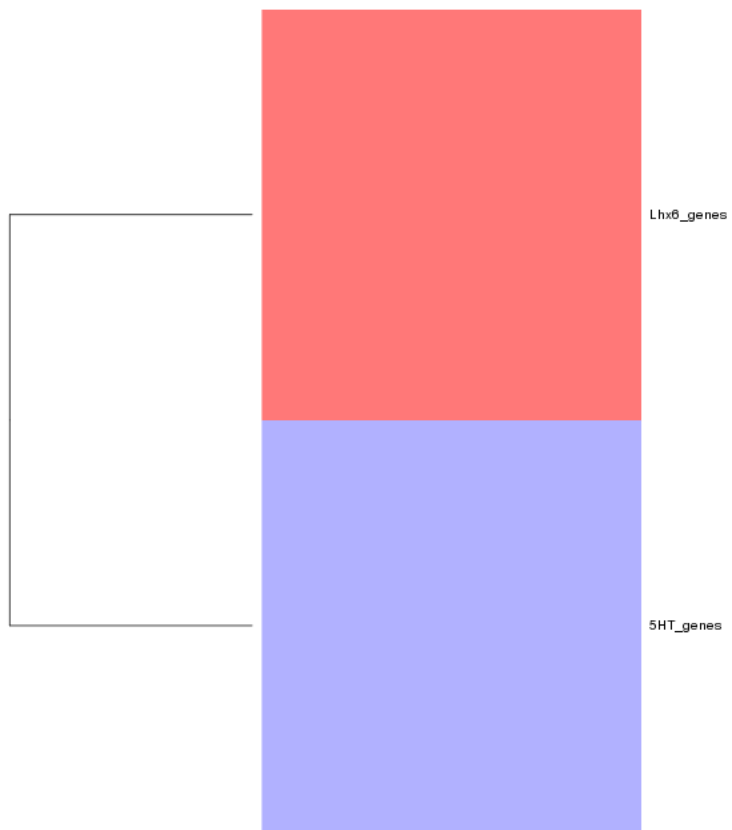

Oncogene enrichment:

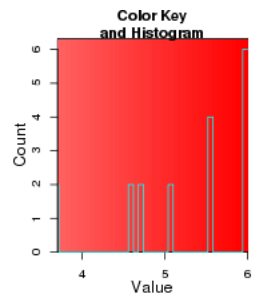

\_\_\_\_\_

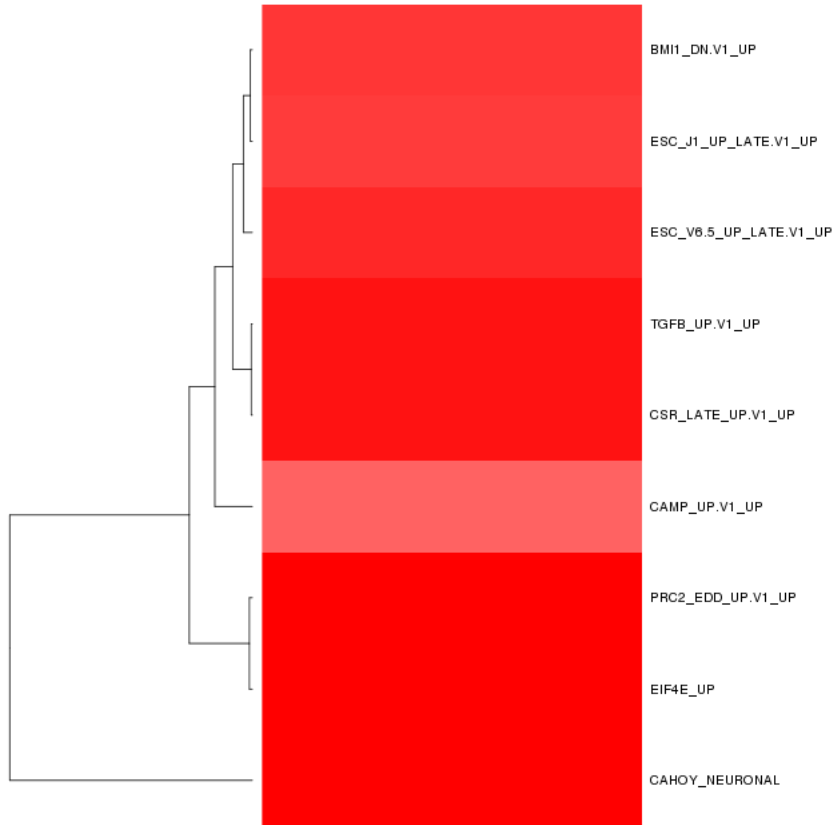

Oncogene zscore:



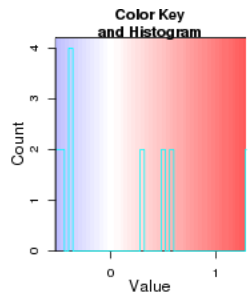

\_\_\_\_\_

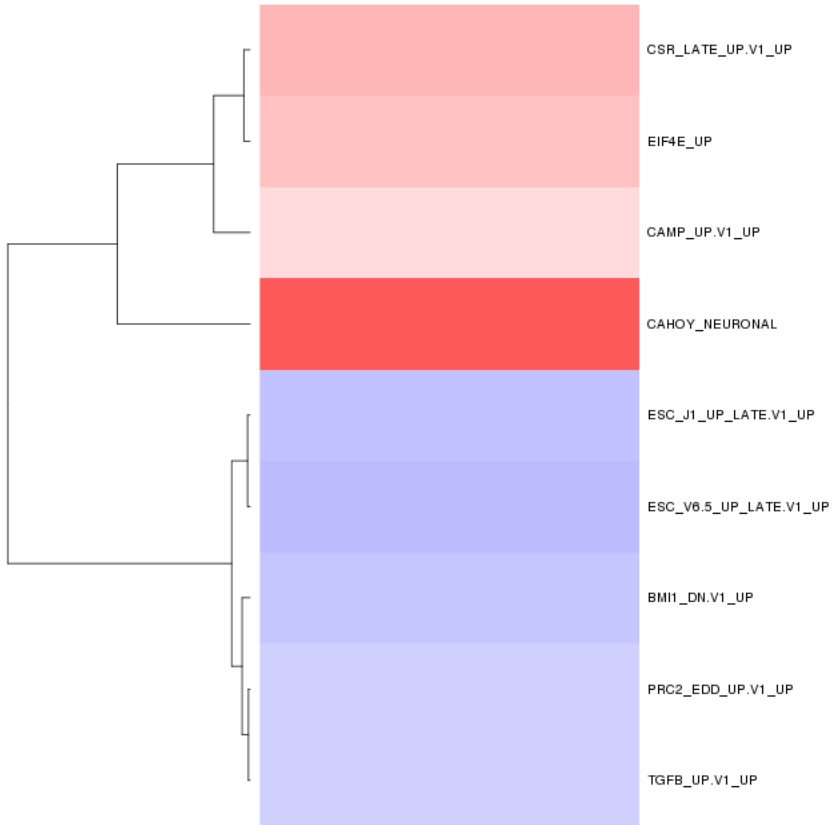

Immuno enrichment:

## Error: no locations are finite

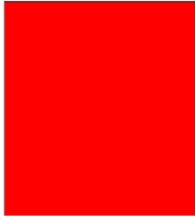

\_\_\_\_\_

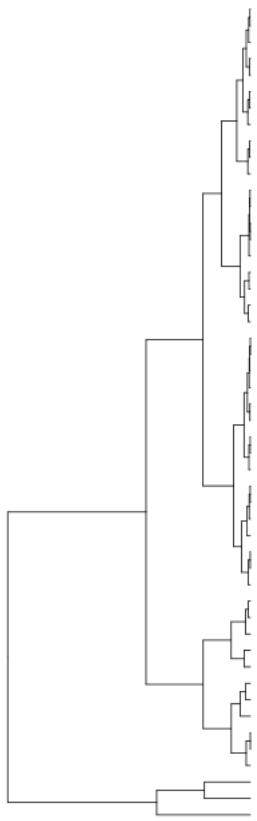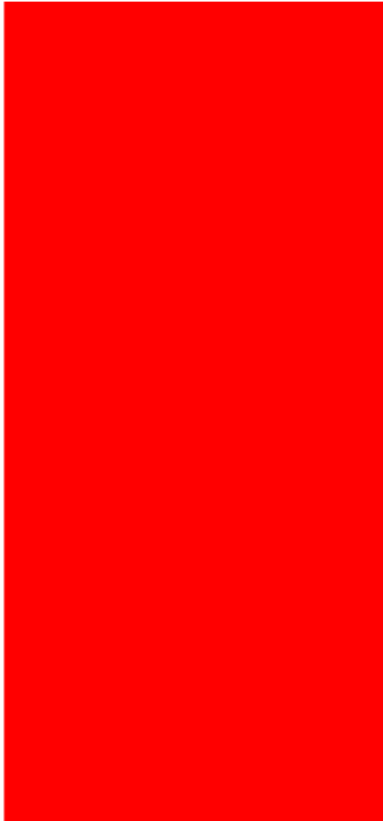

GSE15930\_NAIVE\_VS\_24H\_IN\_VITRO\_STIM\_IN  
GSE14000\_TRANSLATED\_RNA\_VS\_MRNA\_DC\_  
GSE17721\_LPS\_VS\_PAM3CSK4\_12H\_BMDM\_D  
GSE17721\_12H\_VS\_24H\_LPS\_BMDM\_DN  
GSE17580\_UNINFECTED\_VS\_S\_MANSONI\_INF.  
GSE12845\_IGD\_POS\_VS\_NEG\_BLOOD\_BCELL  
GSE14000\_TRANSLATED\_RNA\_VS\_MRNA\_DC\_  
GSE22886\_UNSTIM\_VS\_STIM\_MEMORY\_TCELL  
GSE15930\_NAIVE\_VS\_24H\_IN\_VITRO\_STIM\_CI  
GSE24026\_PD1\_LIGATION\_VS\_CTRL\_IN\_ACT\_  
GSE17721\_LPS\_VS\_PAM3CSK4\_1H\_BMDM\_UP  
GSE24634\_TREG\_VS\_TCONV\_POST\_DAYS\_IL4  
GSE22886\_NEUTROPHIL\_VS\_DC\_DN  
GSE22886\_NAIVE\_TCELL\_VS\_NEUTROPHIL\_UI  
GSE17721\_PAM3CSK4\_VS\_CPG\_12H\_BMDM\_L  
GSE12845\_IGD\_NEG\_BLOOD\_VS\_NAIVE\_TONR  
GSE39820\_TGFBETA1\_IL6\_VS\_TGFBETA1\_IL6  
GSE31082\_DN\_VS\_DP\_THYMOCYTE\_UP  
GSE17721\_12H\_VS\_24H\_GARDIQUIMOD\_BMDM  
GSE26669\_CTRL\_VS\_COSTIM\_BLOCK\_MLR\_CI  
GSE22886\_DAY1\_VS\_DAY7\_MONOCYTE\_IN\_CI  
GSE17721\_LPS\_VS\_CPG\_4H\_BMDM\_DN  
GSE3982\_EOSINOPHIL\_VS\_TH1\_DN  
GSE22886\_DAY0\_VS\_DAY7\_MONOCYTE\_IN\_CI  
GSE17721\_PAM3CSK4\_VS\_GADIOQUIMOD\_12H  
GSE22886\_NAIVE\_CD4\_TCELL\_VS\_48H\_ACT\_  
GSE17721\_LPS\_VS\_POLYIC\_24H\_BMDM\_UP  
GSE13485\_DAY7\_VS\_DAY21\_YF17D\_VACCINE  
GSE37416\_CTRL\_VS\_48H\_F\_TULARENSIS\_LV1  
GSE1460\_CORD\_VS\_ADULT\_BLOOD\_NAIVE\_C  
GSE17974\_CTRL\_VS\_ACT\_IL4\_AND\_ANTI\_IL12  
GSE10239\_MEMORY\_VS\_DAY4.5\_EFF\_CD8\_TC  
GSE22886\_NEUTROPHIL\_VS\_MONOCYTE\_DN  
KAECH\_DAY8\_EFF\_VS\_MEMORY\_CD8\_TCELL\_  
GSE24634\_TEFF\_VS\_TCONV\_DAYS\_IN\_CULTU  
GSE15930\_NAIVE\_VS\_24H\_IN\_VITRO\_STIM\_IL  
GSE14000\_TRANSLATED\_RNA\_VS\_MRNA\_4H\_  
GSE22886\_NAIVE\_CD4\_TCELL\_VS\_48H\_ACT\_  
GSE14000\_TRANSLATED\_RNA\_VS\_MRNA\_16H  
KAECH\_DAY8\_EFF\_VS\_DAY15\_EFF\_CD8\_TCEL  
GSE22886\_NAIVE\_CD4\_TCELL\_VS\_12H\_ACT\_  
GSE15930\_NAIVE\_VS\_48H\_IN\_VITRO\_STIM\_IF  
GSE22886\_UNSTIM\_VS\_IL15\_STIM\_NKCELL\_D  
GSE15930\_NAIVE\_VS\_48H\_IN\_VITRO\_STIM\_IL  
GSE29617\_CTRL\_VS\_TIV\_FLU\_VACCINE\_PBMK  
GSE22886\_IL2\_VS\_IL15\_STIM\_NKCELL\_DN  
GSE24634\_NAIVE\_CD4\_TCELL\_VS\_DAYS\_IL4\_  
GSE13485\_DAY1\_VS\_DAY21\_YF17D\_VACCINE  
GSE29617\_CTRL\_VS\_DAY3\_TIV\_FLU\_VACCINE  
GSE15930\_NAIVE\_VS\_48H\_IN\_VITRO\_STIM\_CI

Immuno zscore:

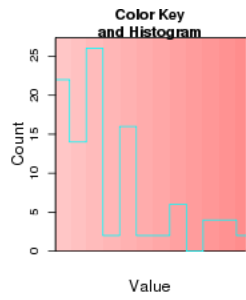

\_\_\_\_\_

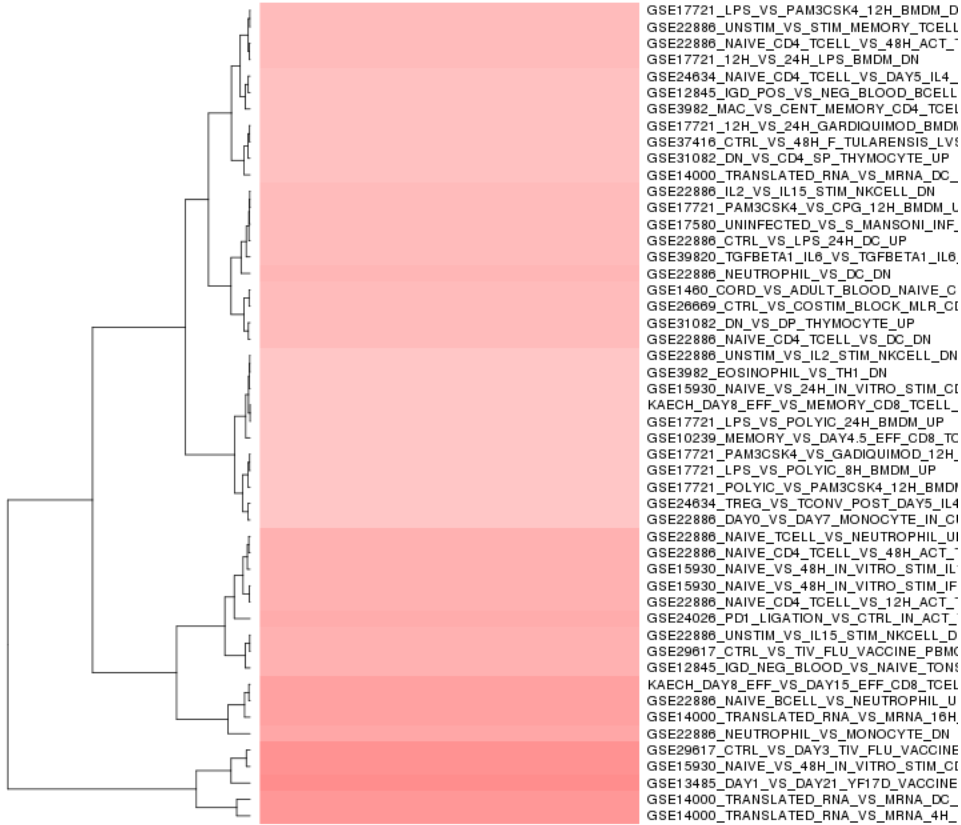

TF enrichment:

## Error: subscript out of bounds

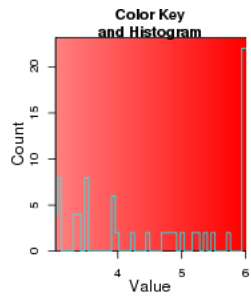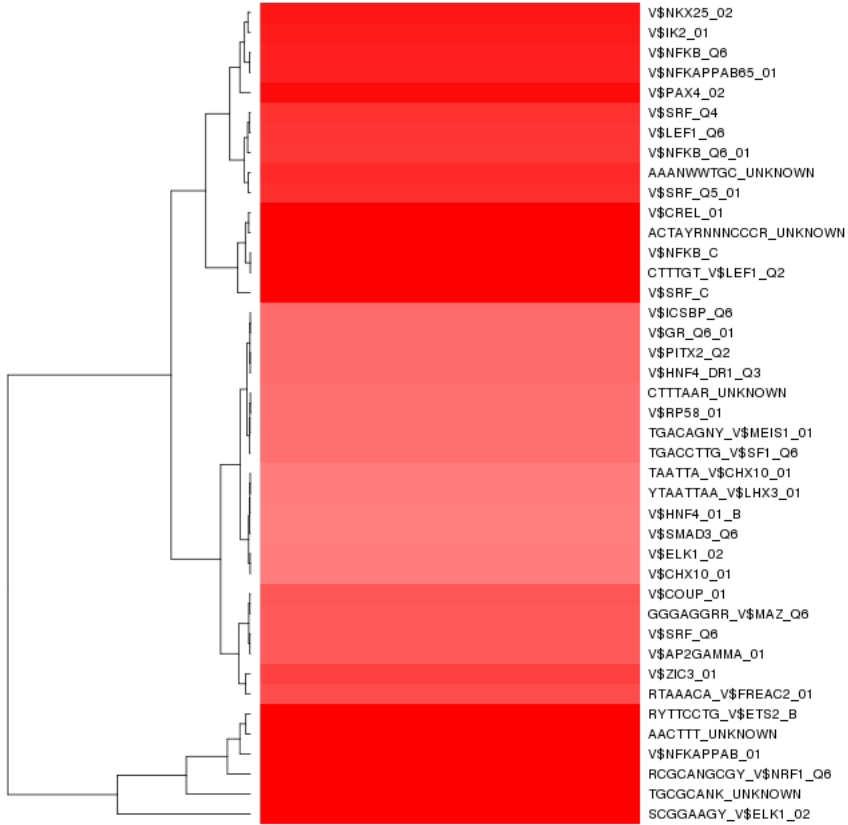

TF zscore:

## Error: subscript out of bounds

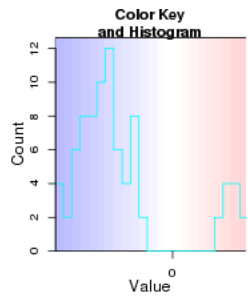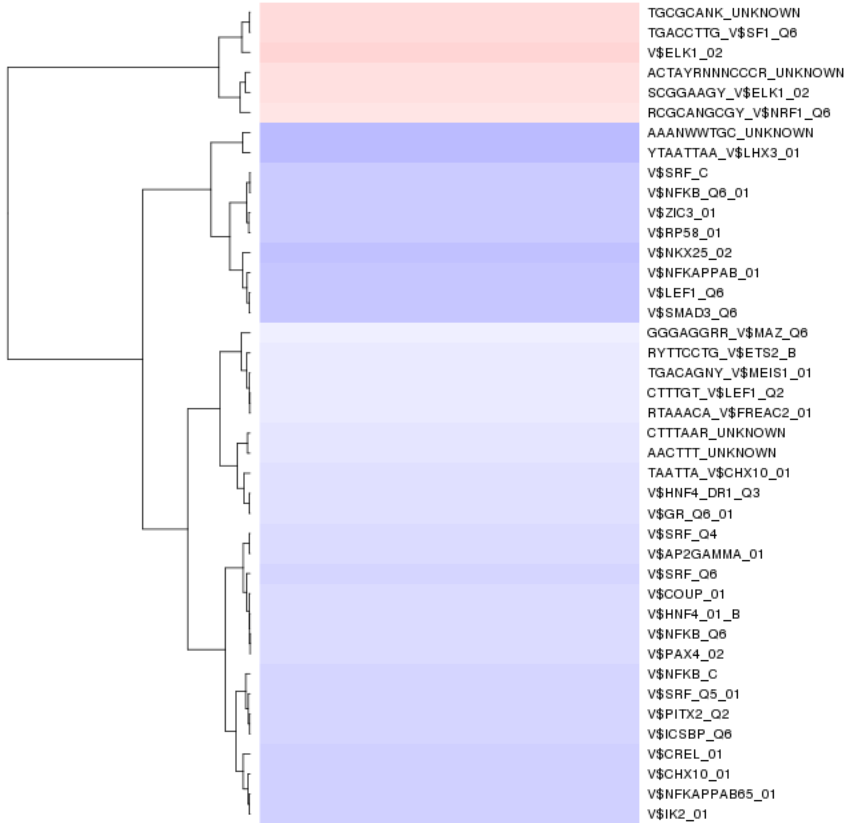

## GO enrichment

Cluster profiler used to call enrichments of significantly differentially regulated genes that map to Entrez IDs.

```
## [1] "ERROR: The estimated pi0 <= 0. Check that you have valid p-values or use another lambda method."
```

```
## [1] "ERROR: The estimated pi0 <= 0. Check that you have valid p-values or use another lambda method."
```

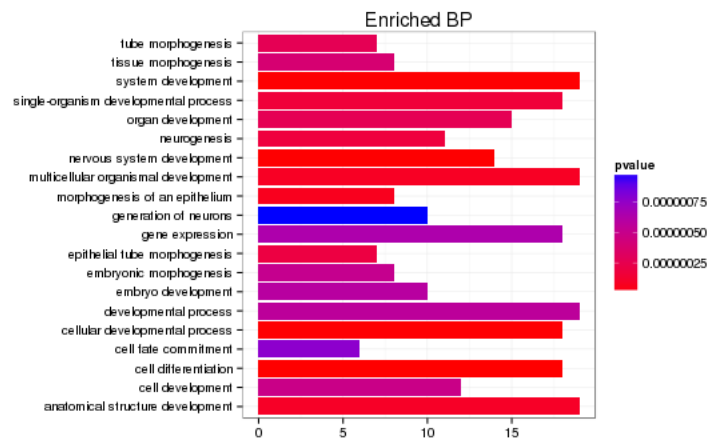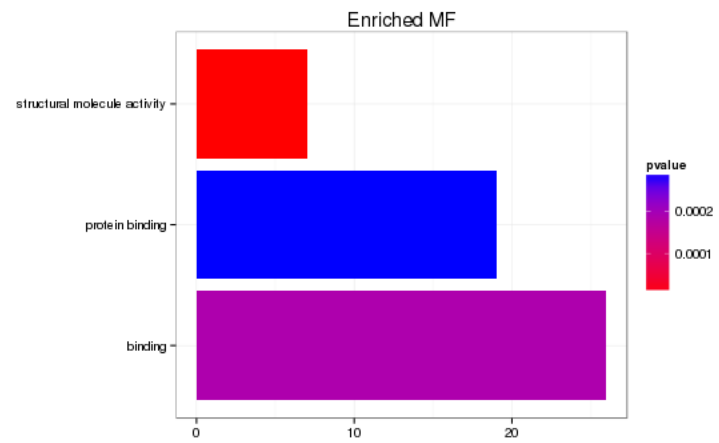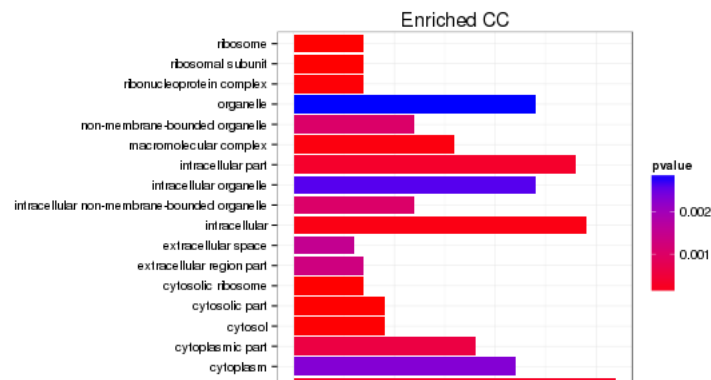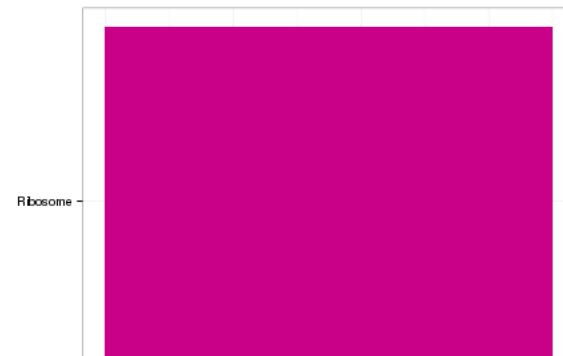

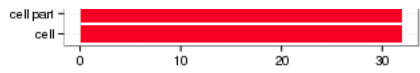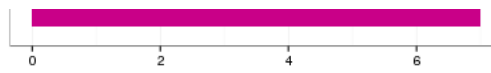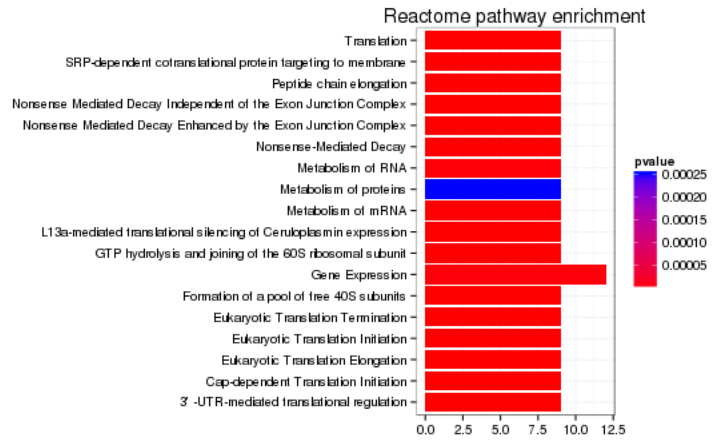

## Enrichment or depletion for stage-specific cell cycle markers

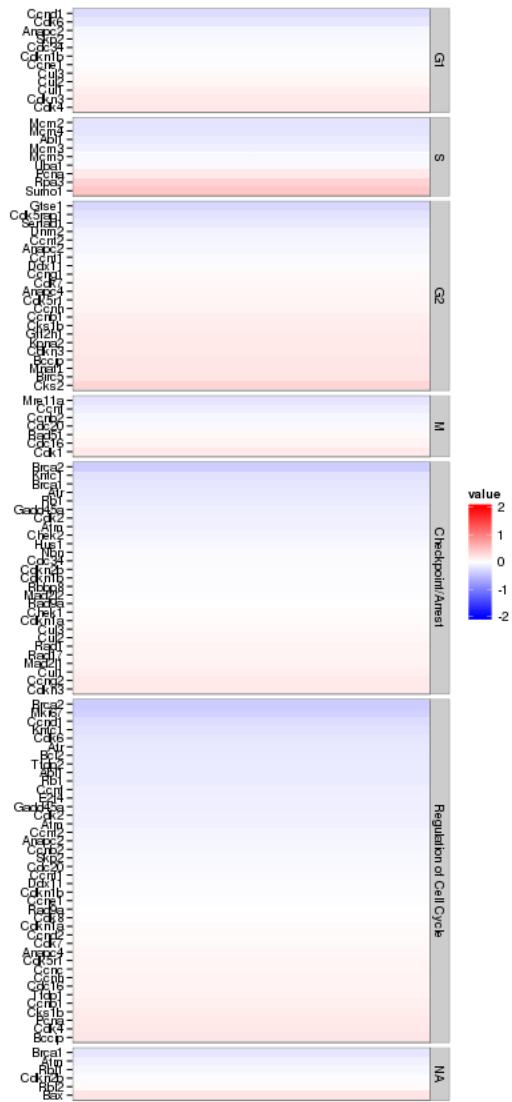



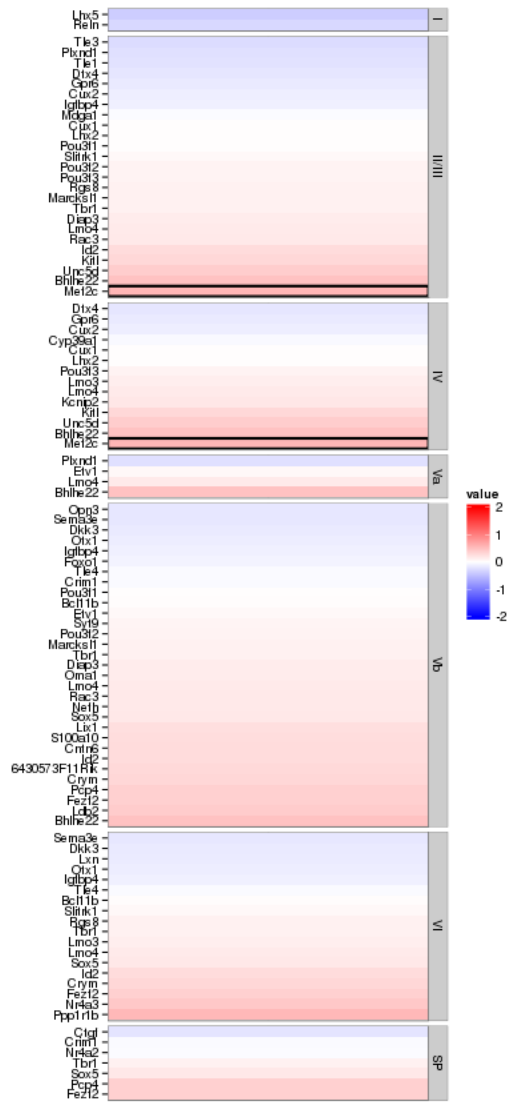

Enrichment or depletion for specific neural cell types

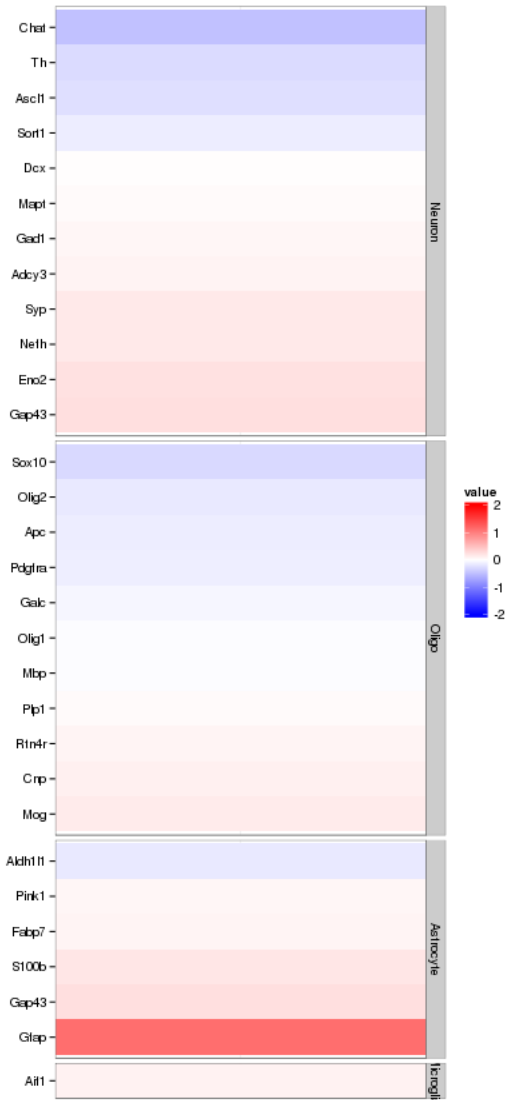

**Enrichment or Depletion of neural differentiation markers**

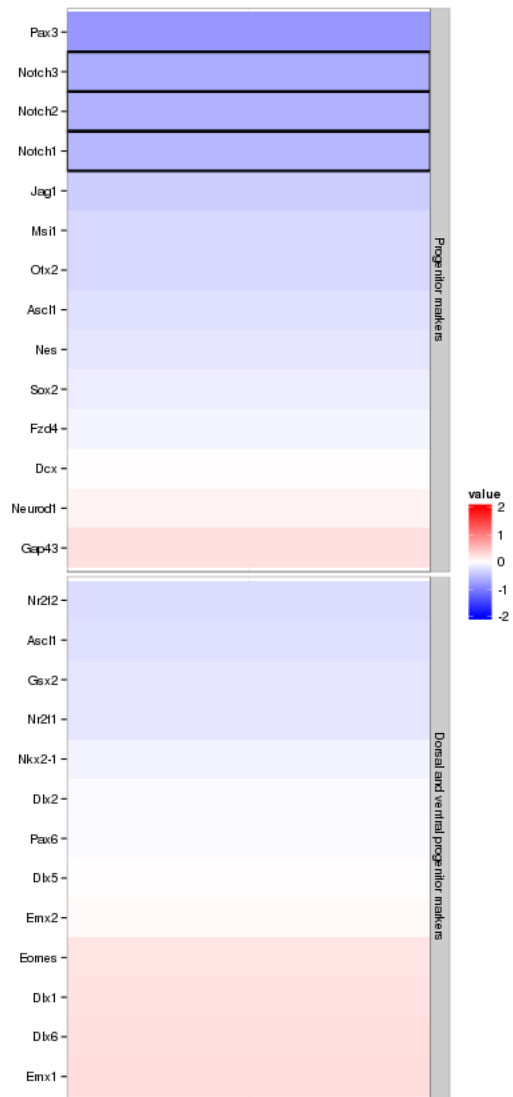

## Cis vs Trans (locally)

$\log_2$  Foldchange and test statistic are calculated with the ratio of  $\text{fpkm(KO)}/\text{fpkm(WT)}$ , thus the  $\text{test\_stat}$  is positive if a gene is higher in the KO and negative if a gene has lower expression in the KO

The pvalue for 0 genes significantly regulated in a region this size is: 1

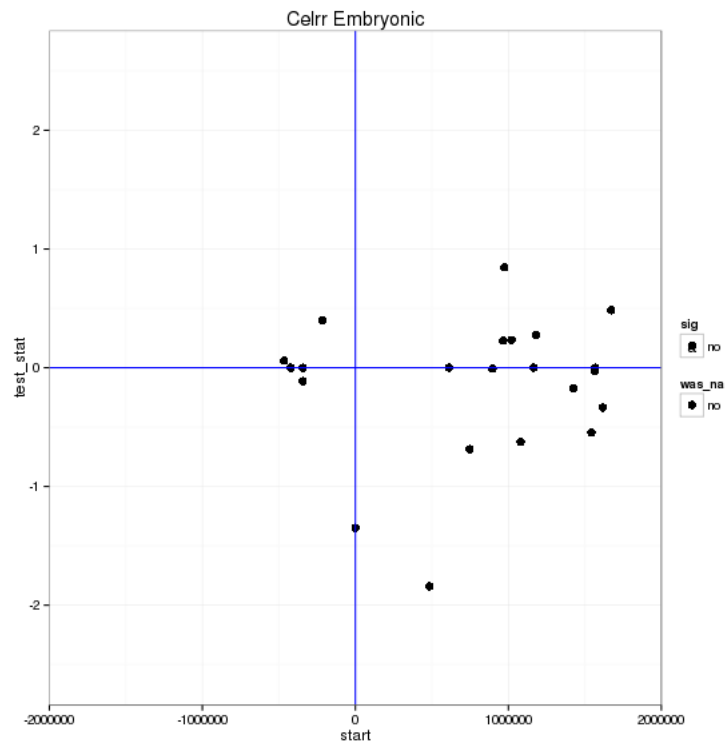

## Notes

Samples used are:

10

- 1 JR753
- 2 JR750
- 3 JR771
- 4 JR755
- 5 JR811
- 6 JR768
- 7 JR761
- 8 JR815
- 9 JR789
- 10 JR748
- 11 JR716
- 12 JR717
- 13 JR719
- 14 JR756

15 JR773

16 JR760

## Replicates

| file                                                                                | sample_name | replicate | rep_name | total_mass  | norm_mass   | internal_scale | external_scale |
|-------------------------------------------------------------------------------------|-------------|-----------|----------|-------------|-------------|----------------|----------------|
| 1 /n/rinn_data1/seq/Igoff/Projects/BrainMap/data/quants/JR753/abundances.cxb WT     |             | 0         | WT_0     | 39331900.00 | 32377800.00 | 1.26           | 1.00           |
| 2 /n/rinn_data1/seq/Igoff/Projects/BrainMap/data/quants/JR750/abundances.cxb WT     |             | 1         | WT_1     | 36031100.00 | 32377800.00 | 1.10           | 1.00           |
| 3 /n/rinn_data1/seq/Igoff/Projects/BrainMap/data/quants/JR771/abundances.cxb WT     |             | 2         | WT_2     | 38857100.00 | 32377800.00 | 1.23           | 1.00           |
| 4 /n/rinn_data1/seq/Igoff/Projects/BrainMap/data/quants/JR755/abundances.cxb WT     |             | 3         | WT_3     | 41811300.00 | 32377800.00 | 1.29           | 1.00           |
| 5 /n/rinn_data1/seq/Igoff/Projects/BrainMap/data/quants/JR811/abundances.cxb WT     |             | 4         | WT_4     | 38172800.00 | 32377800.00 | 1.20           | 1.00           |
| 6 /n/rinn_data1/seq/Igoff/Projects/BrainMap/data/quants/JR768/abundances.cxb WT     |             | 5         | WT_5     | 28375200.00 | 32377800.00 | 0.89           | 1.00           |
| 7 /n/rinn_data1/seq/Igoff/Projects/BrainMap/data/quants/JR761/abundances.cxb WT     |             | 6         | WT_6     | 31706200.00 | 32377800.00 | 0.97           | 1.00           |
| 8 /n/rinn_data1/seq/Igoff/Projects/BrainMap/data/quants/JR815/abundances.cxb WT     |             | 7         | WT_7     | 29733100.00 | 32377800.00 | 0.92           | 1.00           |
| 9 /n/rinn_data1/seq/Igoff/Projects/BrainMap/data/quants/JR789/abundances.cxb WT     |             | 8         | WT_8     | 27681500.00 | 32377800.00 | 0.86           | 1.00           |
| 10 /n/rinn_data1/seq/Igoff/Projects/BrainMap/data/quants/JR748/abundances.cxb WT    |             | 9         | WT_9     | 32367000.00 | 32377800.00 | 0.96           | 1.00           |
| 11 /n/rinn_data1/seq/Igoff/Projects/BrainMap/data/quants/JR716/abundances.cxb WT    |             | 10        | WT_10    | 26144700.00 | 32377800.00 | 0.81           | 1.00           |
| 12 /n/rinn_data1/seq/Igoff/Projects/BrainMap/data/quants/JR717/abundances.cxb WT    |             | 11        | WT_11    | 25565400.00 | 32377800.00 | 0.80           | 1.00           |
| 13 /n/rinn_data1/seq/Igoff/Projects/BrainMap/data/quants/JR719/abundances.cxb WT    |             | 12        | WT_12    | 22697800.00 | 32377800.00 | 0.68           | 1.00           |
| 14 /n/rinn_data1/seq/Igoff/Projects/BrainMap/data/quants/JR756/abundances.cxb WT    |             | 13        | WT_13    | 38948900.00 | 32377800.00 | 1.21           | 1.00           |
| 15 /n/rinn_data1/seq/Igoff/Projects/BrainMap/data/quants/JR773/abundances.cxb Celrr |             | 0         | Celrr_0  | 37950800.00 | 32377800.00 | 1.13           | 1.00           |
| 16 /n/rinn_data1/seq/Igoff/Projects/BrainMap/data/quants/JR760/abundances.cxb Celrr |             | 1         | Celrr_1  | 30671700.00 | 32377800.00 | 0.94           | 1.00           |

## Session Info

```
## R version 3.0.2 (2013-09-25)
## Platform: x86_64-unknown-linux-gnu (64-bit)
##
## locale:
## [1] LC_CTYPE=en_US.UTF-8      LC_NUMERIC=C
## [3] LC_TIME=en_US.UTF-8      LC_COLLATE=en_US.UTF-8
## [5] LC_MONETARY=en_US.UTF-8  LC_MESSAGES=en_US.UTF-8
## [7] LC_PAPER=en_US.UTF-8     LC_NAME=C
## [9] LC_ADDRESS=C             LC_TELEPHONE=C
## [11] LC_MEASUREMENT=en_US.UTF-8 LC_IDENTIFICATION=C
##
## attached base packages:
## [1] grid      parallel  methods  stats    graphics grDevices utils
## [8] datasets base
##
## other attached packages:
## [1] plyr_1.8.1
## [2] stringr_0.6.2
## [3] seqbias_1.10.0
## [4] BSgenome.Mmusculus.UCSC.mm10_1.3.19
## [5] BSgenome_1.30.0
## [6] Biostrings_2.30.1
```

```

## [7] gdata_2.13.3
## [8] GO.db_2.10.1
## [9] org.Mm.eg.db_2.10.1
## [10] clusterProfiler_1.13.1
## [11] DOSE_2.0.0
## [12] ReactomePA_1.6.1
## [13] AnnotationDbi_1.24.0
## [14] Biobase_2.22.0
## [15] mgcv_1.7-29
## [16] nlme_3.1-117
## [17] RMySQL_0.9-3
## [18] RColorBrewer_1.0-5
## [19] gridExtra_0.9.1
## [20] gtable_0.1.2
## [21] marray_1.40.0
## [22] gplots_2.13.0
## [23] GSA_1.03
## [24] limma_3.18.13
## [25] xtable_1.7-3
## [26] cummeRbund_2.7.2
## [27] Gviz_1.6.0
## [28] rtracklayer_1.22.7
## [29] GenomicRanges_1.14.4
## [30] XVector_0.2.0
## [31] IRanges_1.20.7
## [32] fastcluster_1.1.13
## [33] reshape2_1.4
## [34] ggplot2_1.0.0
## [35] RSQLite_0.11.4
## [36] DBI_0.2-7
## [37] BiocGenerics_0.8.0
## [38] knitr_1.6
##
## loaded via a namespace (and not attached):
## [1] biomaRt_2.18.0      biovizBase_1.10.8  bitops_1.0-6
## [4] caTools_1.17        cluster_1.15.2     colorspace_1.2-4
## [7] dichromat_2.0-0     digest_0.6.4       DO.db_2.7
## [10] evaluate_0.5.5      formatR_0.10       Formula_1.1-1
## [13] GenomicFeatures_1.14.5 GOsemSim_1.20.3    graph_1.40.1
## [16] graphite_1.8.1      gtools_3.4.1       Hmisc_3.14-4
## [19] igraph_0.7.1        KEGG.db_2.10.1     KernSmooth_2.23-12
## [22] labeling_0.2        lattice_0.20-29    latticeExtra_0.6-26
## [25] MASS_7.3-33         Matrix_1.1-3       munSELL_0.4.2
## [28] org.Hs.eg.db_2.10.1 proto_0.3-10       qvalue_1.36.0
## [31] Rcpp_0.11.2         RCurl_1.95-4.1     reactome.db_1.46.1
## [34] Rsamtools_1.14.3    scales_0.2.4       splines_3.0.2
## [37] stats4_3.0.2        survival_2.37-7    tcltk_3.0.2
## [40] tools_3.0.2         XML_3.98-1.1       zlibbioc_1.8.0

```

## Run Info

```
##          param
## 1      cmd_line
## 2          version
## 3  SVN_revision
## 4  boost_version
## 5          genome
##
## 1 cuffdiff -p 10 -L WT,Celrr -o /n/rinn_data1/seq/lgoff/Projects/BrainMap/data/diffs/Celrr_vs_WT_Embryonic /n/rinn_data1/seq/lgoff/Projects/BrainMap/dat
## 2
## 3
## 4
## 5
```

# Crnde KO vs WT (Adult)

This file shows the wt-v-ko comparison for Crnde.

Cuff overview:

```
## CuffSet instance with:  
## 2 samples  
## 26754 genes  
## 77524 isoforms  
## 0 TSS  
## 23066 CDS  
## 0 promoters  
## 0 splicing  
## 19954 relCDS
```

## QC

### Dispersion

Dispersion plot for genes in cuff: (Overdispersion can lead to innacurate quants)

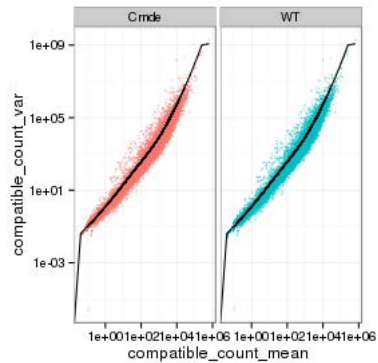

### Cross-replicate variability (fpkmSCVplot)

Differences in CV 2 can result in lower numbers of differentially expressed genes due to a higher degree of variability between replicate fpkm estimates.

Genes:



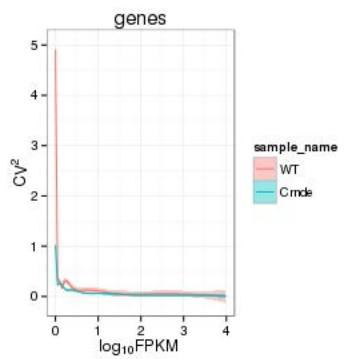

Isoforms:

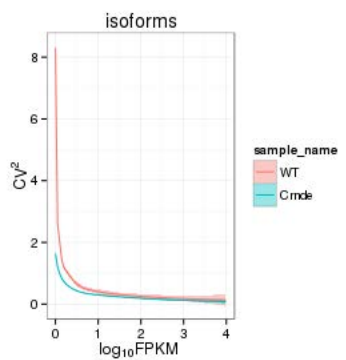

## MvA plot

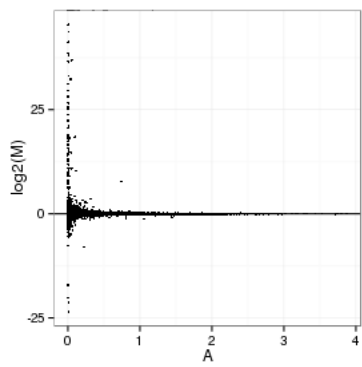

## MvA plot counts

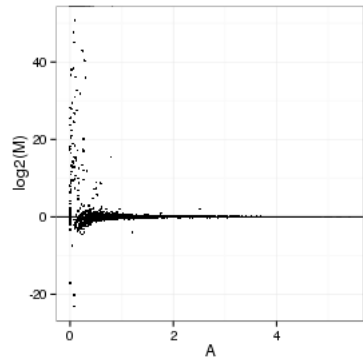

## Scatterplot matrix

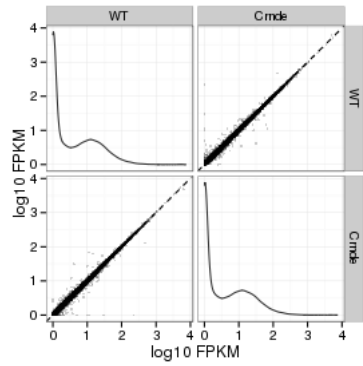

## Distributions

### Boxplots

Boxplot (genes)

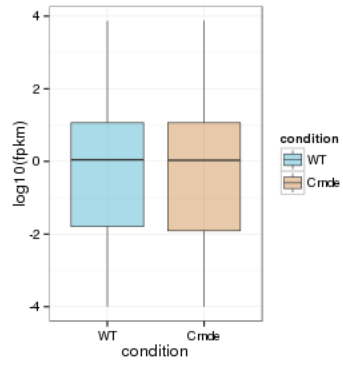

Boxplot (genes, replicates)

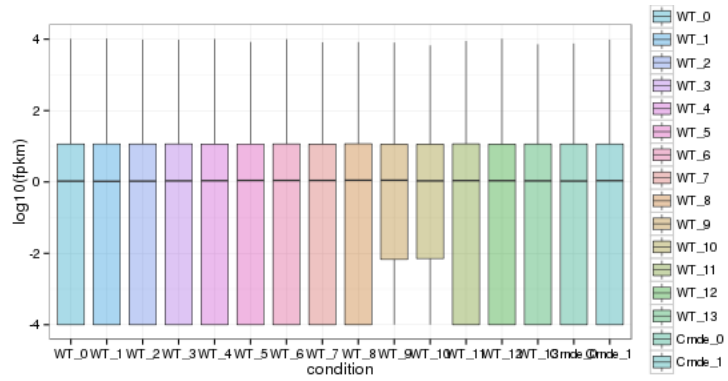

Boxplot (isoforms)

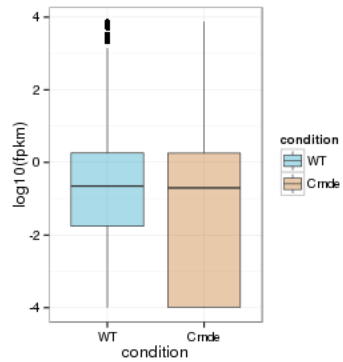

Boxplot (isoforms, replicates)

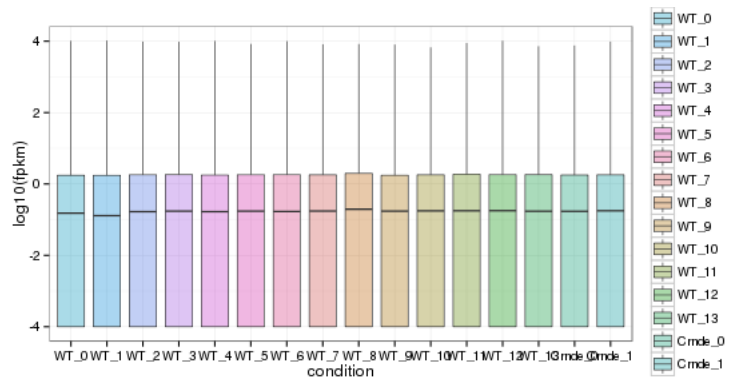

## Density

Density (genes)

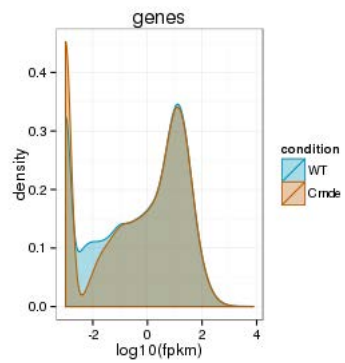

Density (genes, replicates)

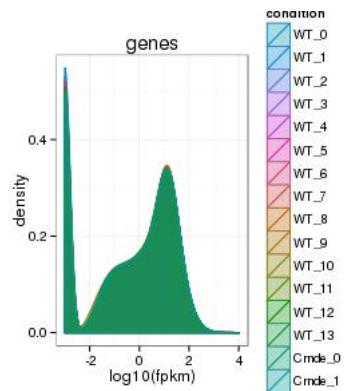

# Clustering

## Replicate Clusters

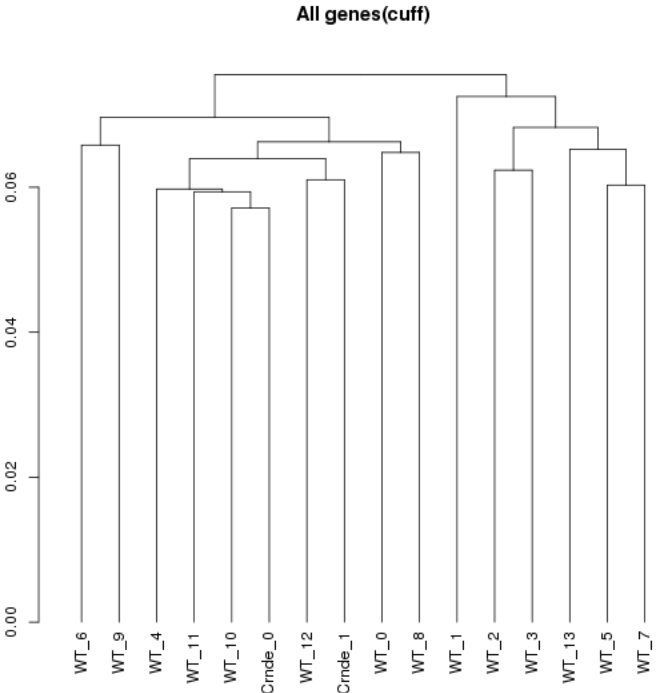

## NULL

## PCA (genes)

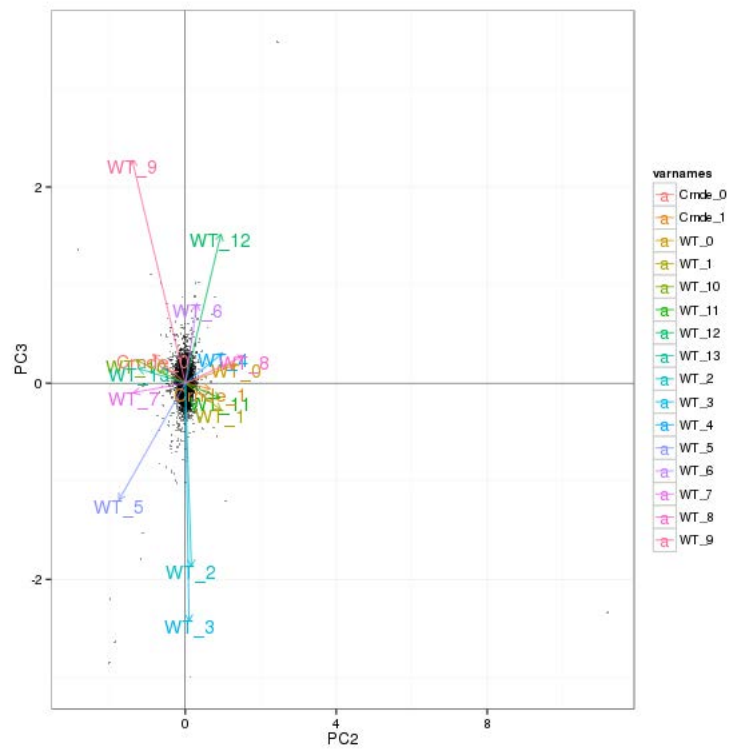

**MDS (genes)**

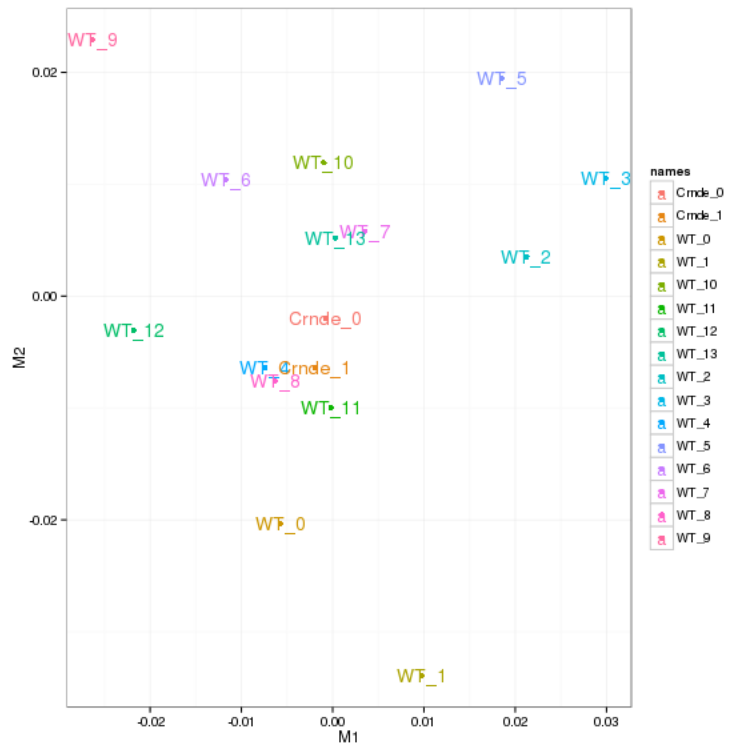

**KO assessment**  
**Endogenous lncRNA expression**

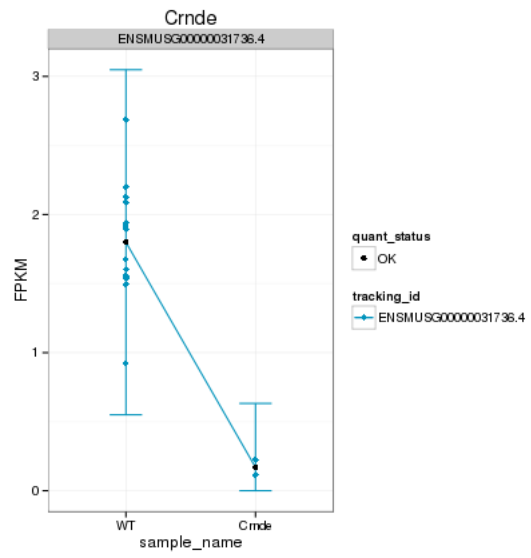

Endogenous expression of Crnde isoforms:



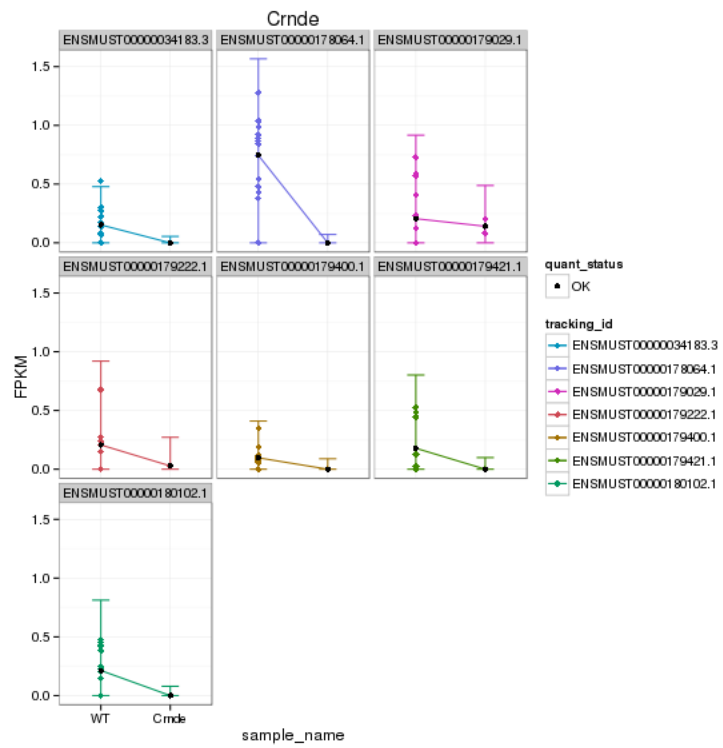

Barplot of gene expression:

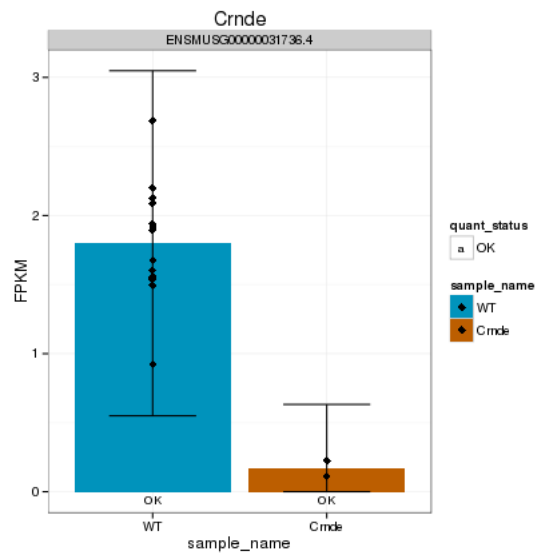

Barplot of isoform expression:

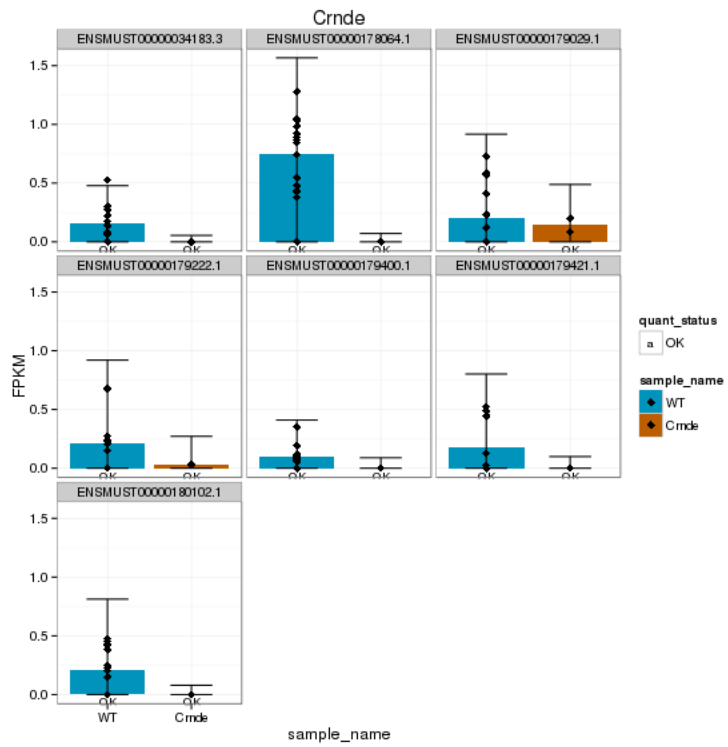

## LacZ expression

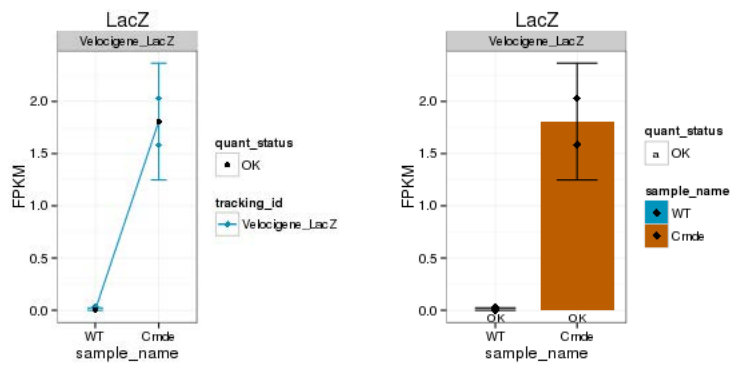

## Digital Genotyping (LacZ vs Endogenous lincRNA and Sex)

Eif2s3y is a y-expressed gene, Xist is an x-expressed gene Expression plot (endogenous linc, lacZ, Y-expressed gene):

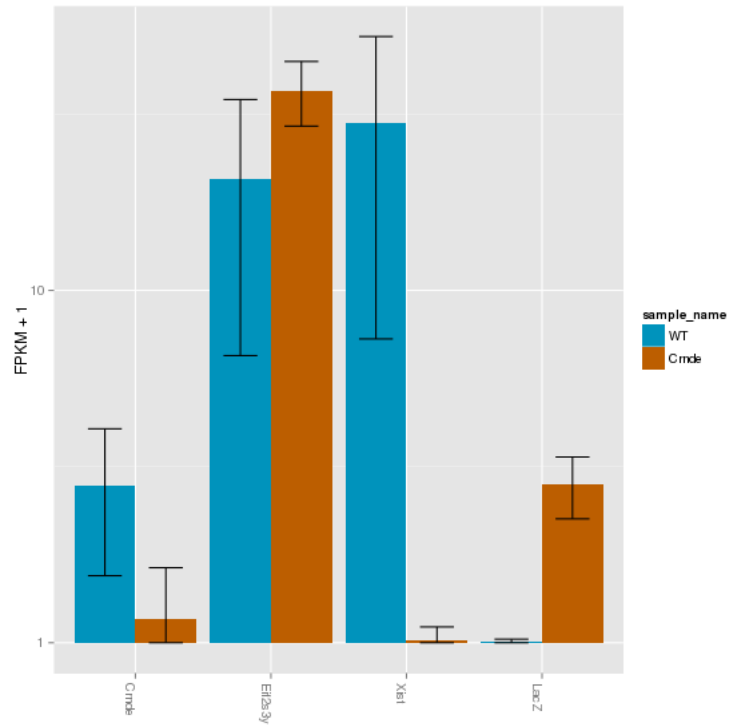

Expression heatmap:

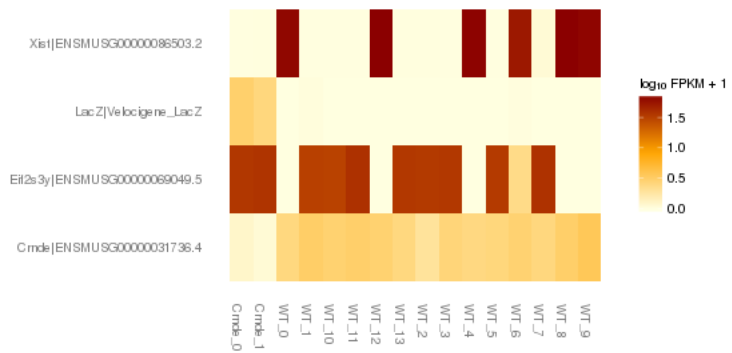

Track visualization

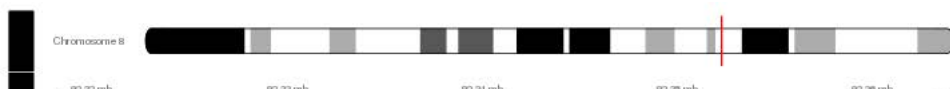

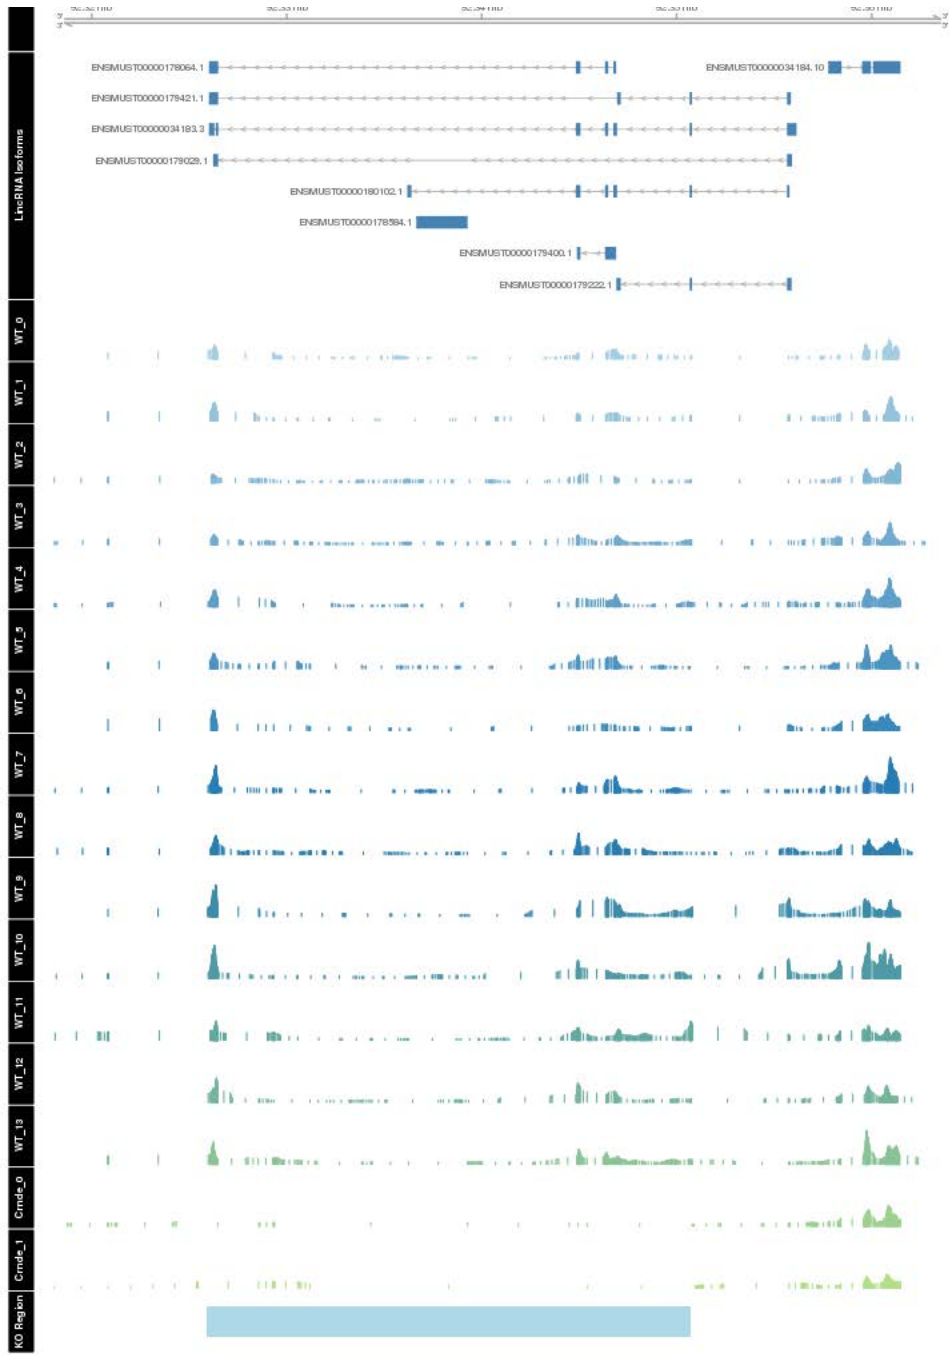

# Differential Analysis

## Differential Genes

There are 42 significantly differentially expressed genes. They are:

**geneAnnot\$gene\_short\_name**

- 1 Fosb
- 2 Merlk
- 3 Adi1
- 4 Fos
- 5 Arc
- 6 Nr4a1
- 7 Cdkn1a
- 8 Clic5
- 9 Fkbp5
- 10 Tma16
- 11 Unc5a
- 12 Sgk3
- 13 Nr4a3
- 14 Slc2a1
- 15 Mfsd2a
- 16 Tinagl1
- 17 Fosl2
- 18 Hddc3
- 19 Mt2
- 20 Sox10
- 21 Lpcat2
- 22 Arhgap27
- 23 Klf10
- 24 Egr2
- 25 Egr1
- 26 Pcsk1n
- 27 Cdc42ep4
- 28 Npas4
- 29 Cdh19
- 30 Junb
- 31 Kdm5d
- 32 Gm5506
- 33 Cox5b
- 34 Scoc
- 35 Ddx3y
- 36 Jund
- 37 Egr4

38 Gm7292  
39 A830036E02Rik  
40 Xist  
41 AA465934  
42 Ccdc85b

## Matrix of gene significant differences between conditions

(skip for Brainmap wt-v-ko comparisons)

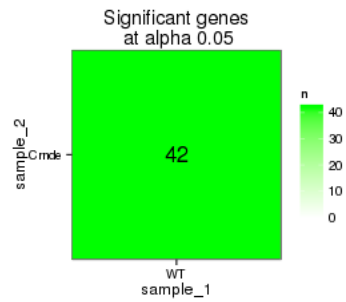

## Significant gene expression differences between conditions

Expression plot (genes):(turned off)

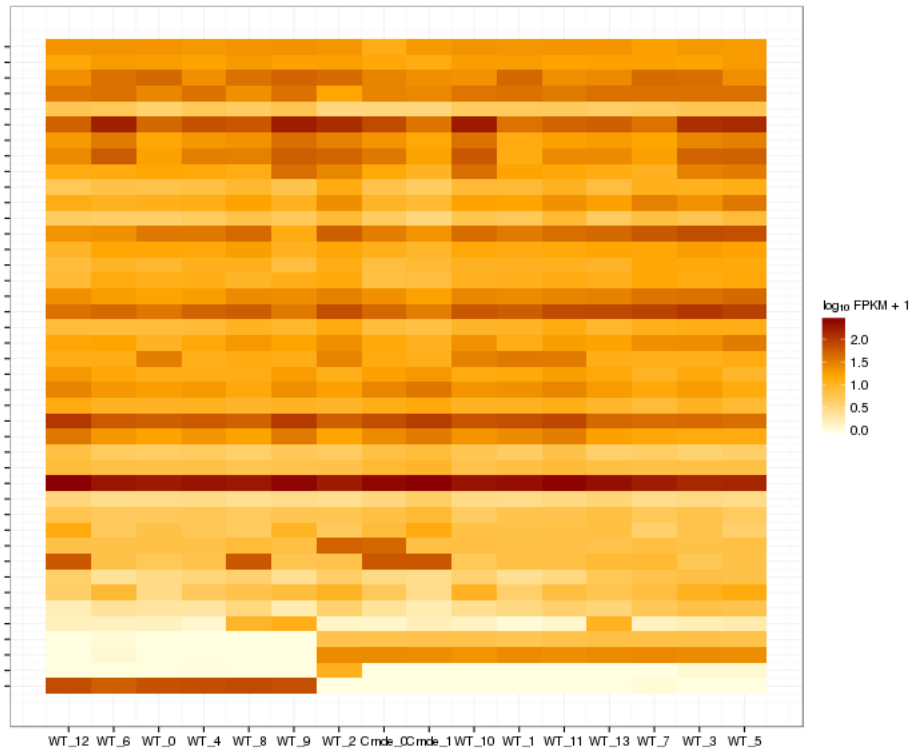

Significant genes with expression >50fpkm (any condition):(turned off)

An individual look at each of the highly expressed significantly differentially regulated genes: (eval=false for first pass)

### Expression-level/significance relationship

Scatter plot of significant genes only:

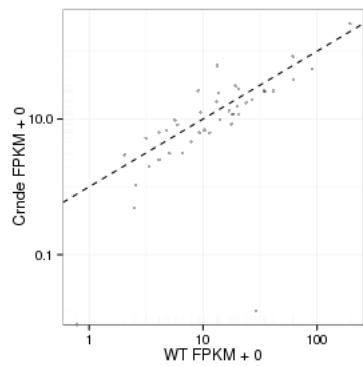



### Volcano Plot

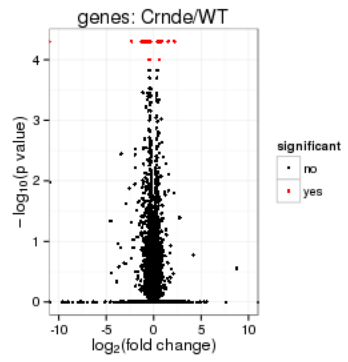

### Volcano plot with significant genes only:

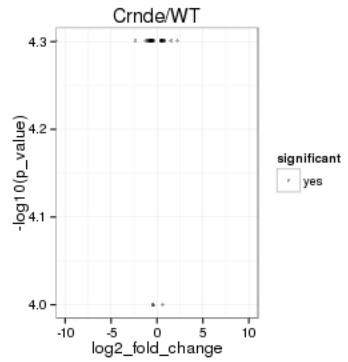

### FoldChange Heatmap

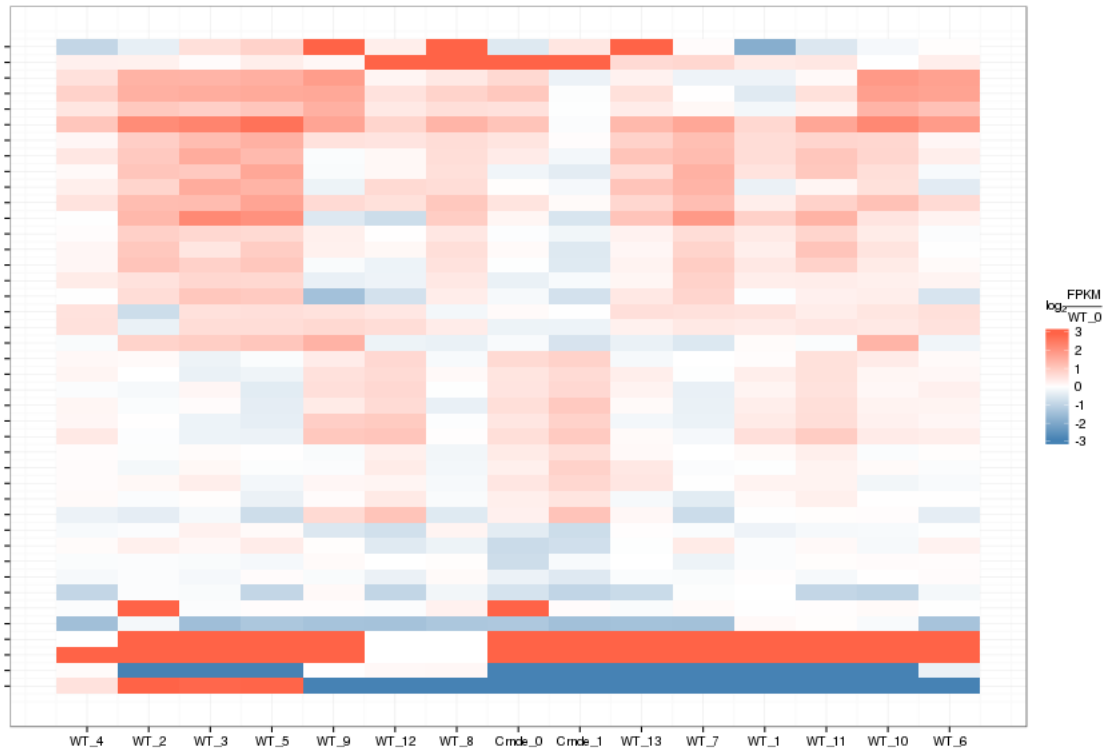

## Differential Splicing

### Differential Isoforms between conditions

Per isoform difference between conditions:



These isoforms are:

[1] "no sig isoforms"

Gene-level DE isoform heatmap

```
## [1] "no sig isoforms"
```

Isoform foldchange heatmap by isoform:

```
## [1] "no sig isoforms"
```

## Differential Splicing between conditions

(eval false for first pass)

Per condition differences in isoforms (Does gene have diff piechart between conditions?)

These genes are:

Splicing heatmap by isoform:

Splicing heatmap by gene

The following are significantly differentially spliced genes (relative portion of isoform per condition):

# Gene/Pathway Analysis

## GSEA

Enrichment and zscores are calculated based on expression in KO vs WT (fpkmKO/fpkmWT), so genes that are down regulated in KO are shown in blue, while upregulation is shown in red.

KOWT Blue = down in KO Red = Up in KO

Biocarta enrichment:

```
## [1] "Not enough significant categories to print a heatmap!"
```

Biocarta zscore:

```
## [1] "Not enough significant categories to print a heatmap!"
```

Reactome enrichment:

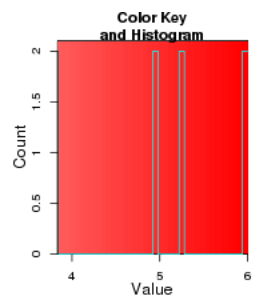

\_\_\_\_\_

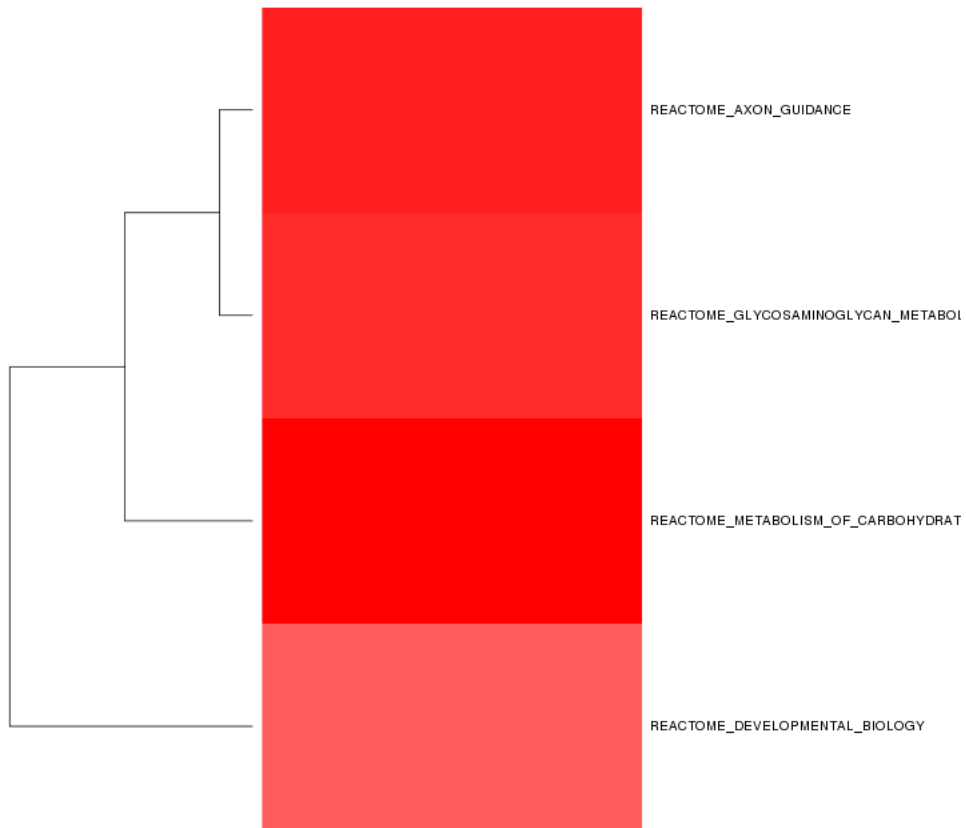

Reactome zscore:

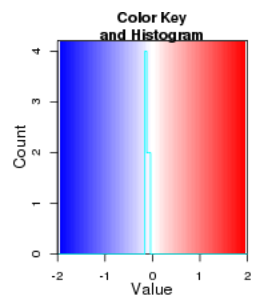

\_\_\_\_\_

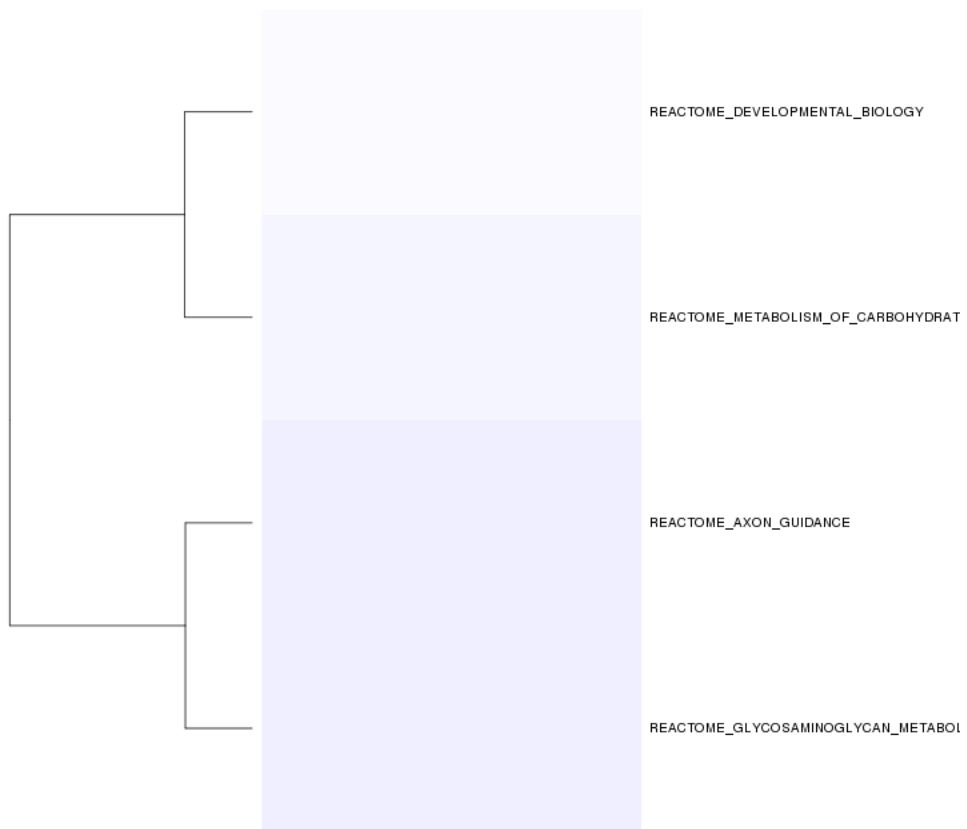

Kegg enrichment:

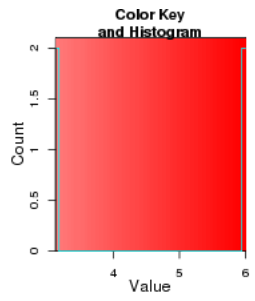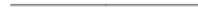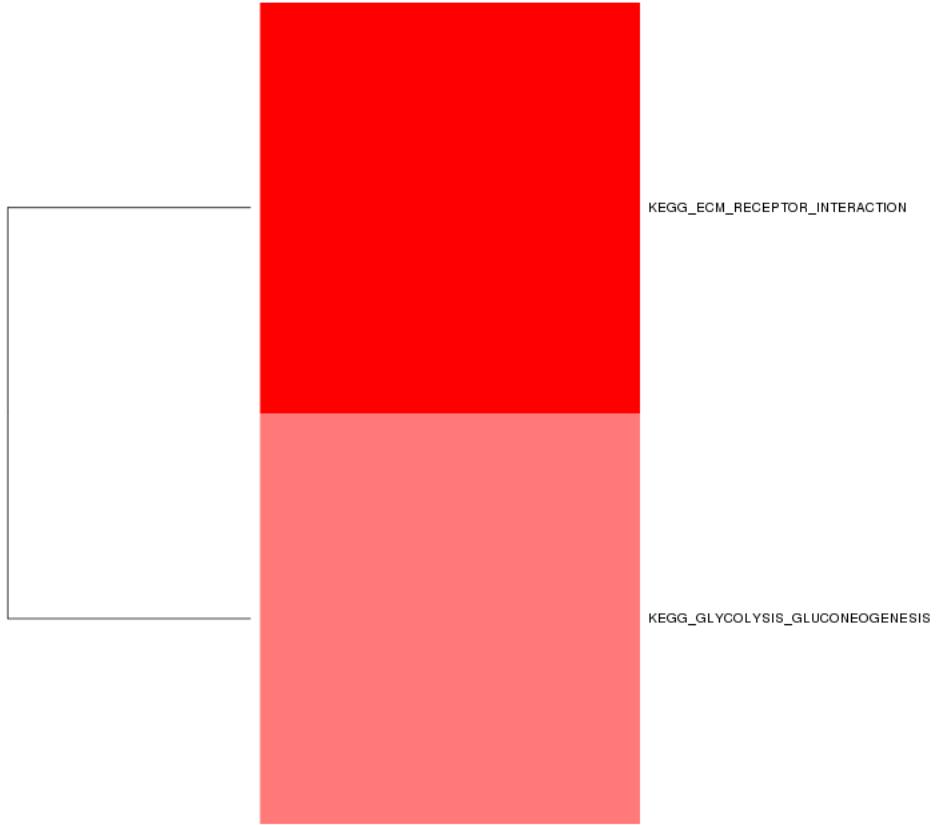

Kegg zscore:

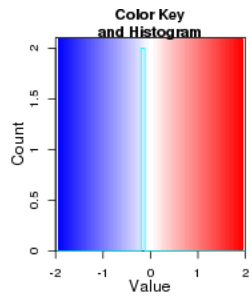

\_\_\_\_\_

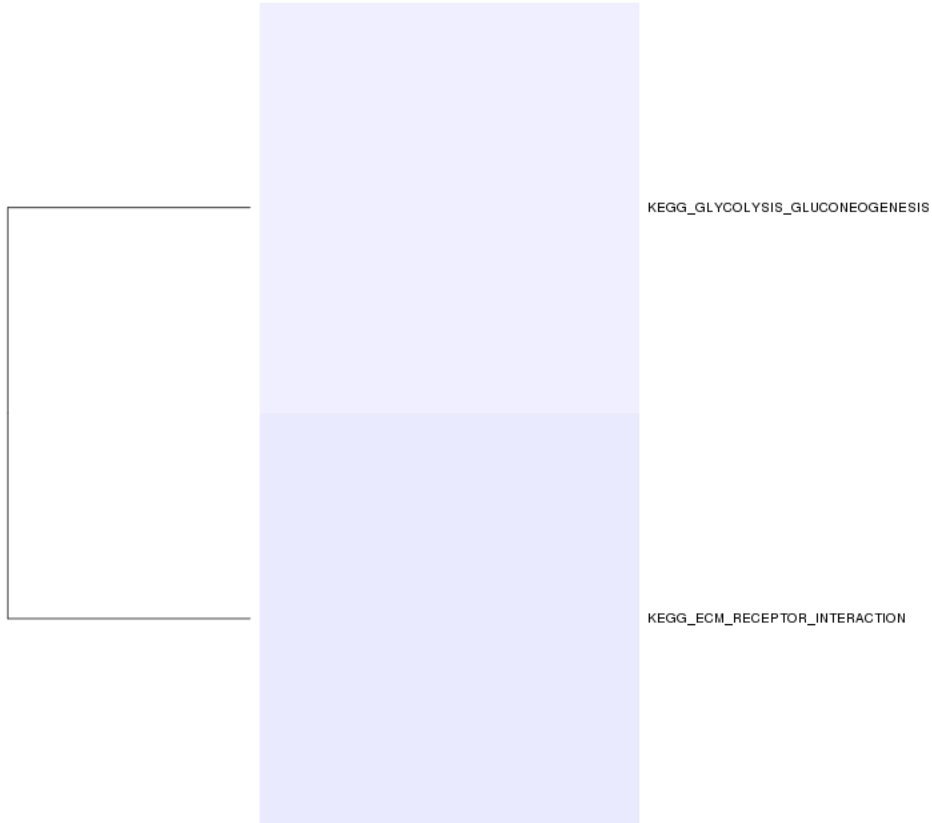

Interneuron enrichment:

```
## [1] "Not enough significant categories to print a heatmap!"
```

Interneuron zscore:

```
## [1] "Not enough significant categories to print a heatmap!"
```

Oncogene enrichment:

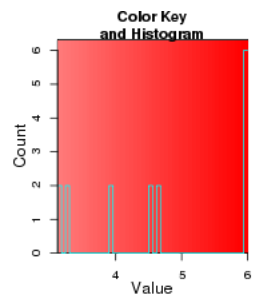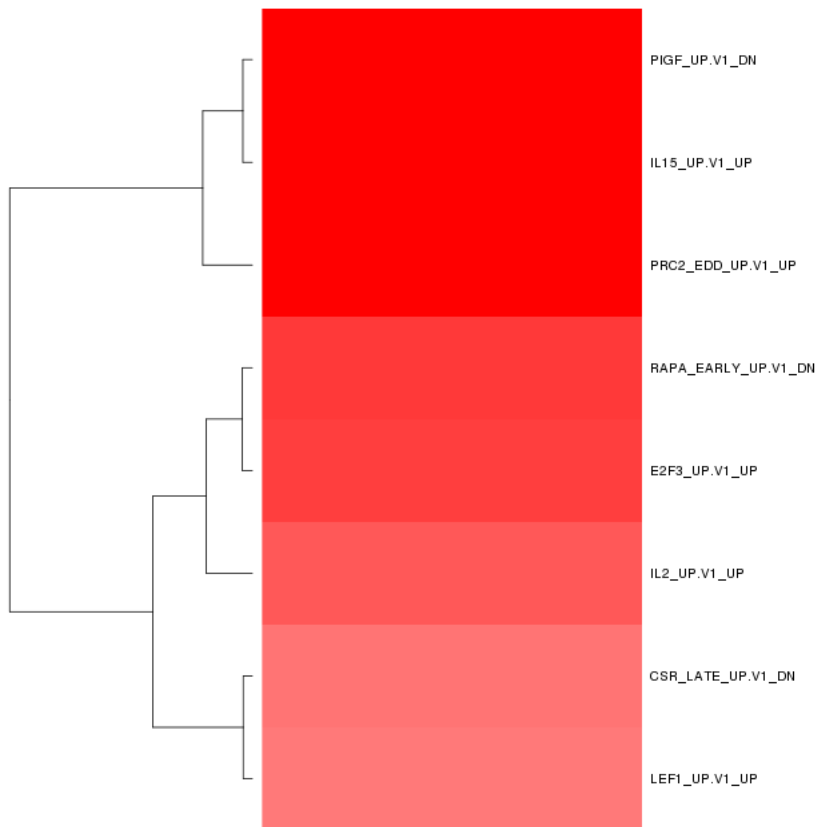

Oncogene zscore:



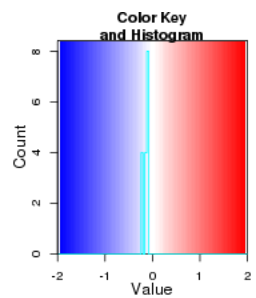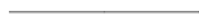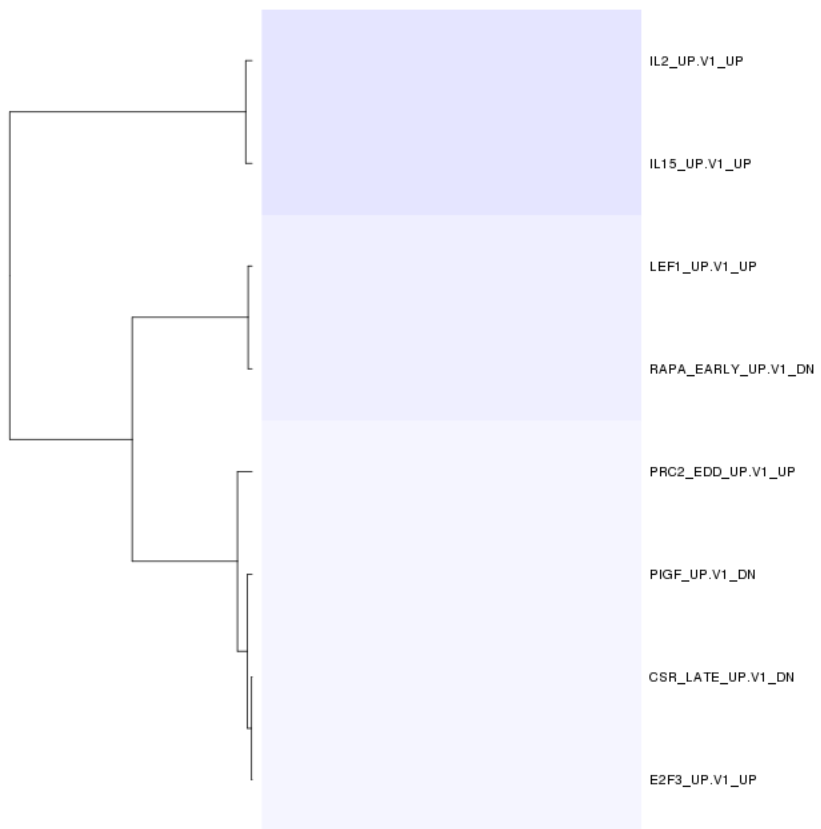

Immuno enrichment:

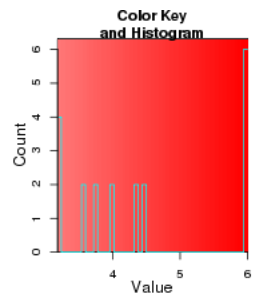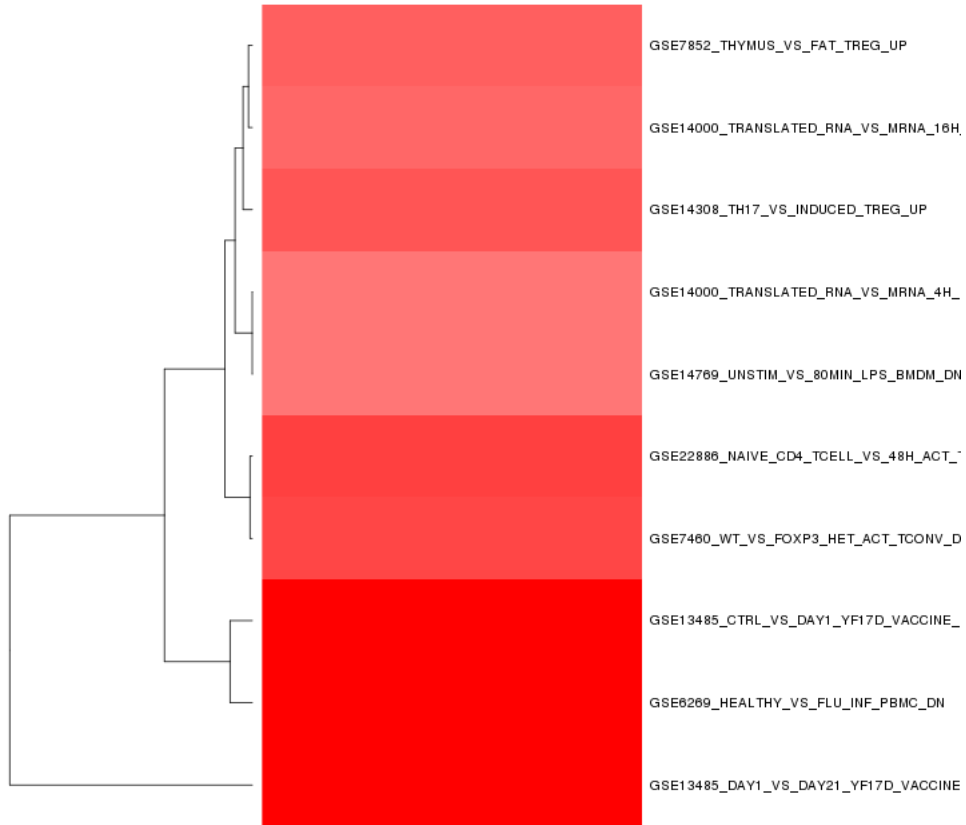

Immuno zscore:

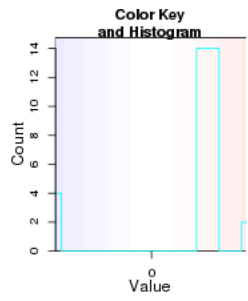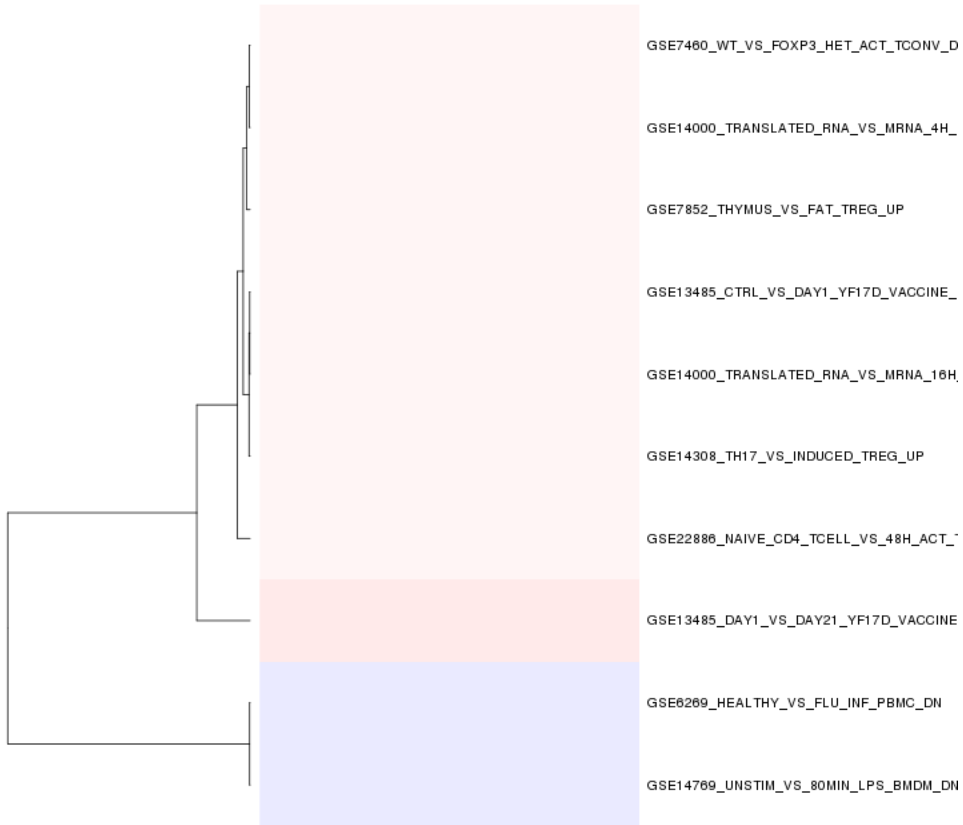

TF enrichment:

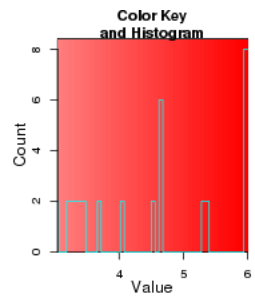

\_\_\_\_\_

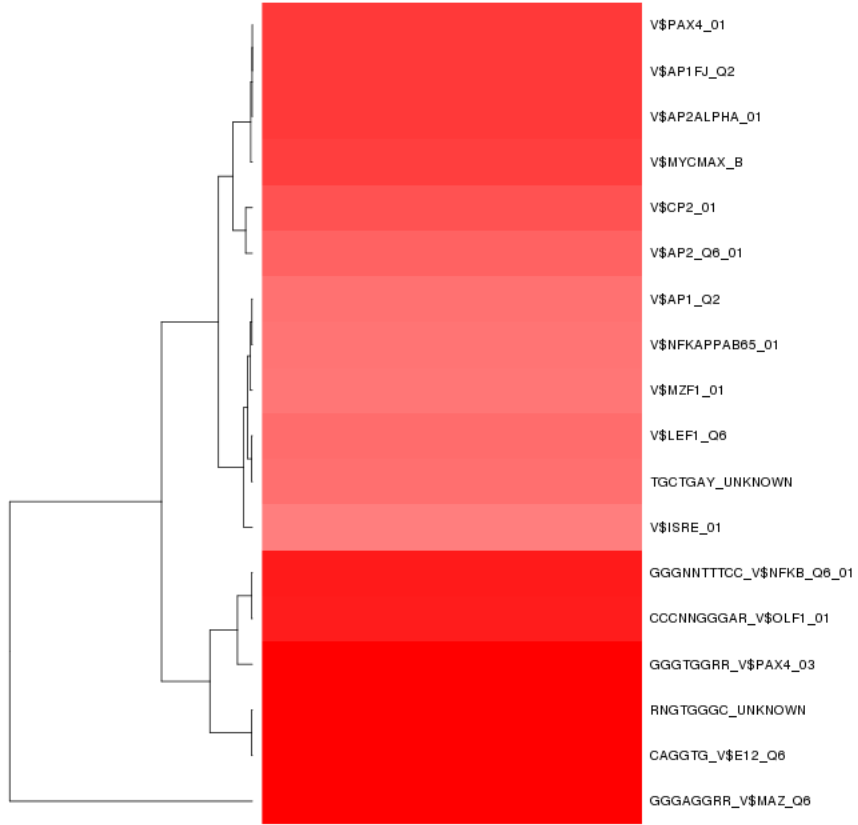

TF zscore:

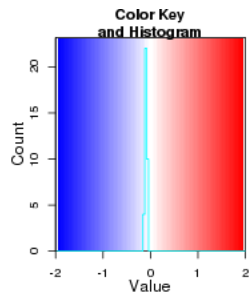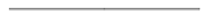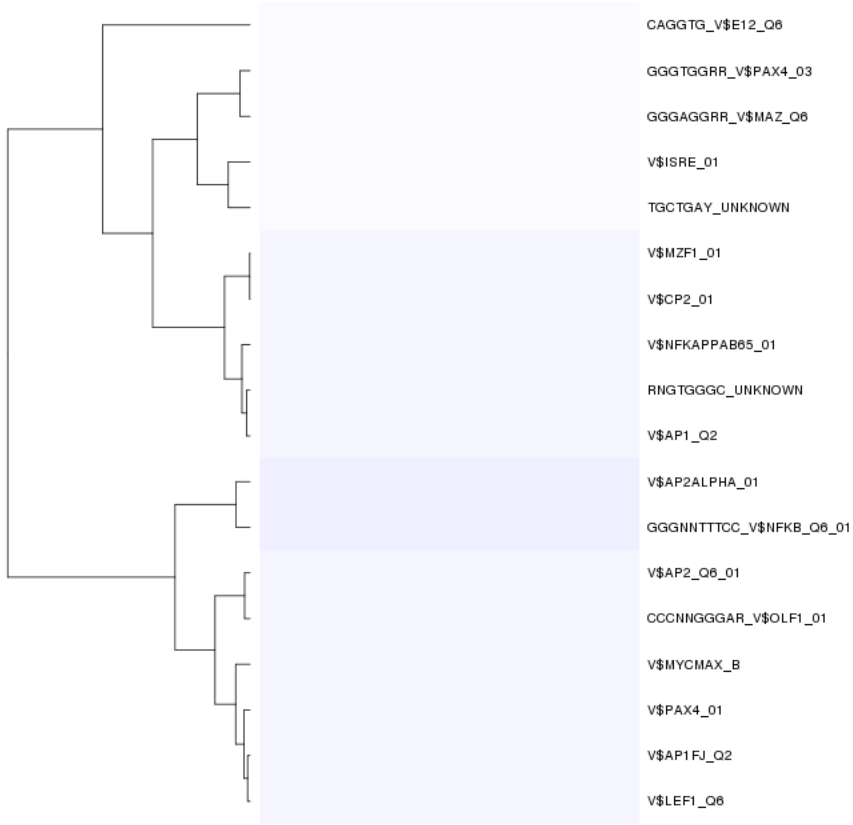

## GO enrichment

Cluster profiler used to call enrichments of significantly differentially regulated genes that map to Entrez IDs.

```
## [1] "ERROR: The estimated pi0 <= 0. Check that you have valid p-values or use another lambda method."
```

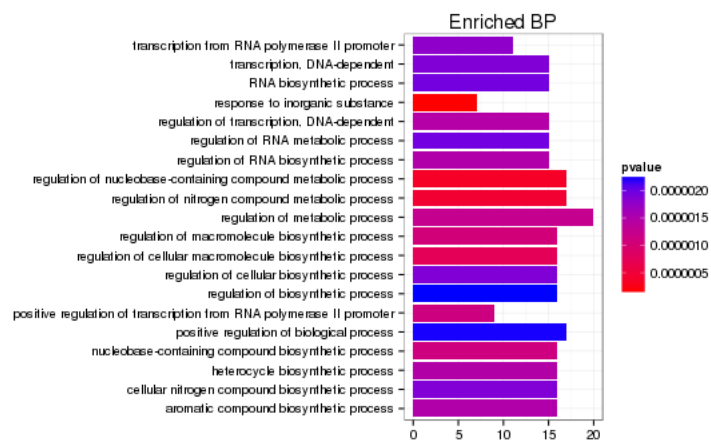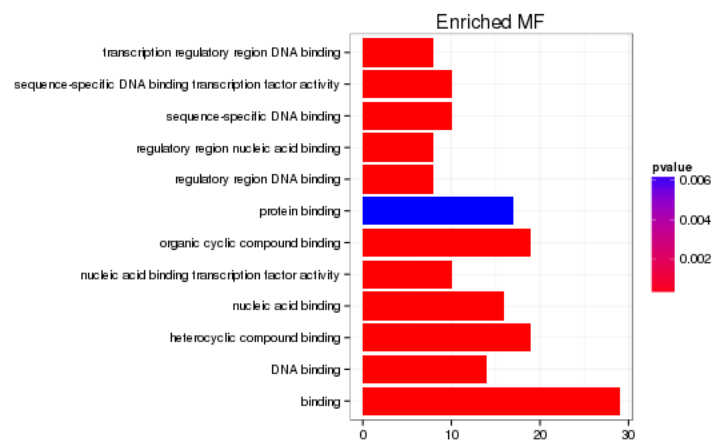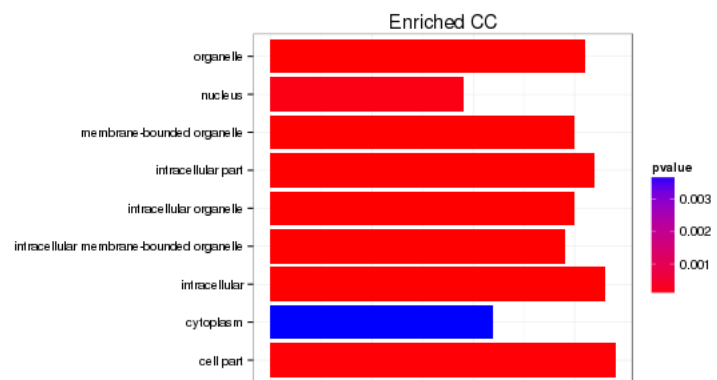

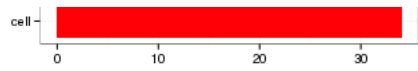

```
## Error: need finite 'xlim' values
```

```
## Error: 'x' and 'units' must have length > 0
```

## Enrichment or depletion for stage-specific cell cycle markers

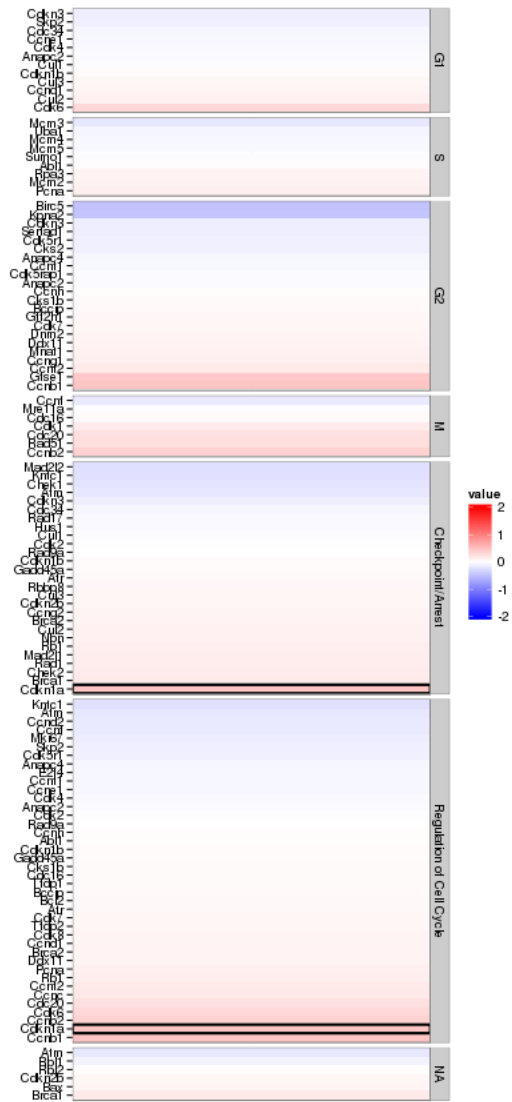

Enrichment or depletion for markers of specific cortical layers



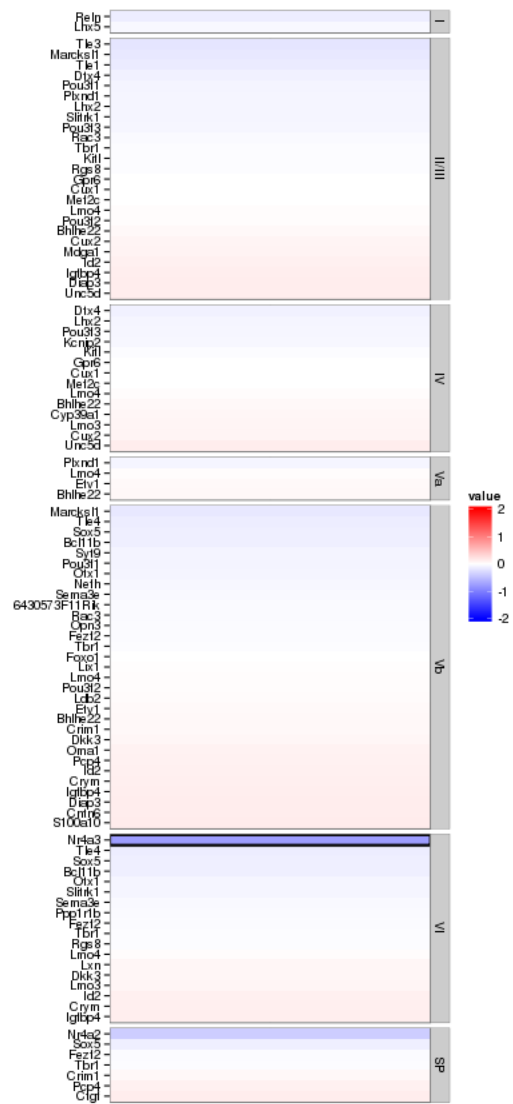

Enrichment or depletion for specific neural cell types

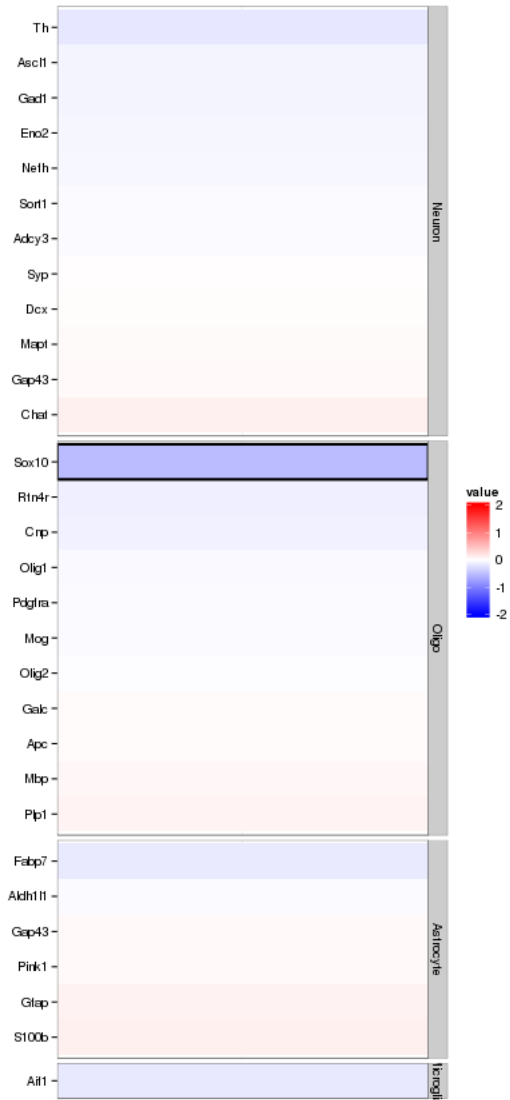

**Enrichment or Depletion of neural differentiation markers**

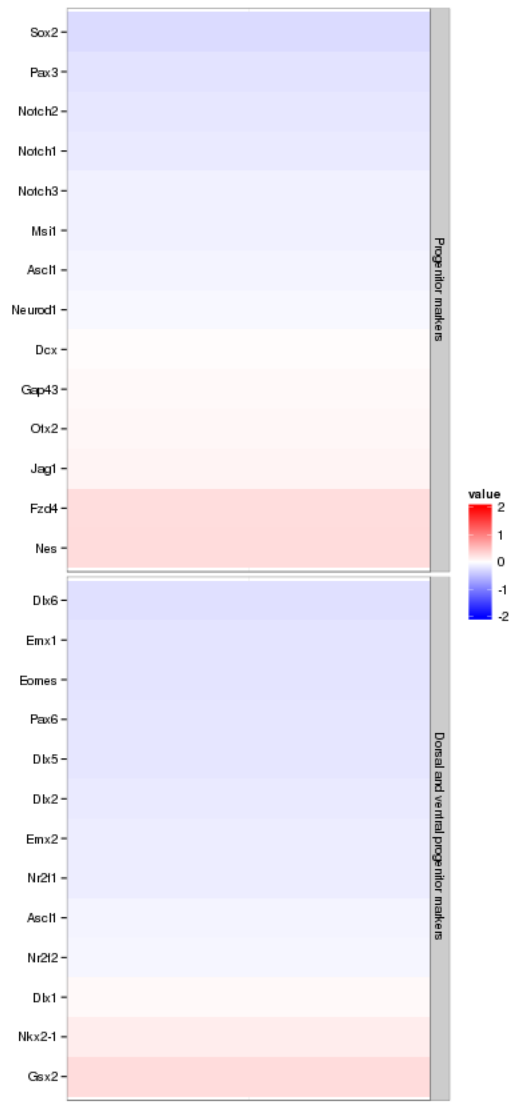

## Cis vs Trans (locally)

$\log_2$  Foldchange and test statistic are calculated with the ratio of  $\text{fpkm(KO)}/\text{fpkm(WT)}$ , thus the  $\text{test\_stat}$  is positive if a gene is higher in the KO and negative if a gene has lower expression in the KO

The pvalue for 2 genes significantly regulated in a region this size is: 0.0189

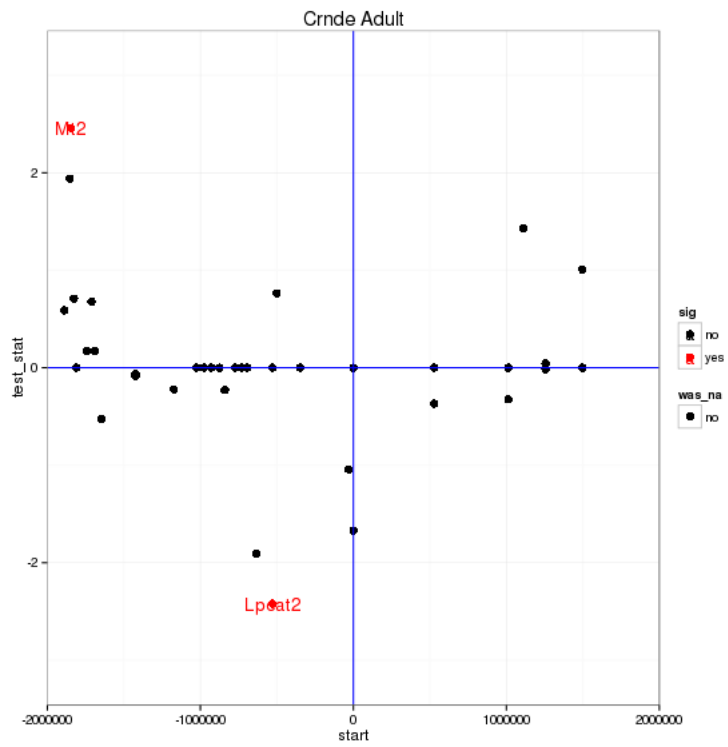

## Notes

Samples used are:

10

- 1 JR729
- 2 JR728
- 3 JR796
- 4 JR797
- 5 JR740
- 6 JR800
- 7 JR827
- 8 JR778
- 9 JR734
- 10 JR802
- 11 JR803
- 12 JR735
- 13 JR785
- 14 JR781

15 JR741

16 JR784

## Replicates

| file                                                                          | sample_name | replicate | rep_name | total_mass  | norm_mass   | internal_scale | external_scale |
|-------------------------------------------------------------------------------|-------------|-----------|----------|-------------|-------------|----------------|----------------|
| 1 /n/rinn_data1/seq/Igoff/Projects/BrainMap/data/quants/JR729/abundances.cxb  | WT          | 0         | WT_0     | 26334400.00 | 34590000.00 | 0.76           | 1.00           |
| 2 /n/rinn_data1/seq/Igoff/Projects/BrainMap/data/quants/JR728/abundances.cxb  | WT          | 1         | WT_1     | 20329200.00 | 34590000.00 | 0.59           | 1.00           |
| 3 /n/rinn_data1/seq/Igoff/Projects/BrainMap/data/quants/JR796/abundances.cxb  | WT          | 2         | WT_2     | 34089000.00 | 34590000.00 | 0.98           | 1.00           |
| 4 /n/rinn_data1/seq/Igoff/Projects/BrainMap/data/quants/JR797/abundances.cxb  | WT          | 3         | WT_3     | 28103300.00 | 34590000.00 | 0.80           | 1.00           |
| 5 /n/rinn_data1/seq/Igoff/Projects/BrainMap/data/quants/JR740/abundances.cxb  | WT          | 4         | WT_4     | 35808200.00 | 34590000.00 | 1.04           | 1.00           |
| 6 /n/rinn_data1/seq/Igoff/Projects/BrainMap/data/quants/JR800/abundances.cxb  | WT          | 5         | WT_5     | 37012200.00 | 34590000.00 | 1.07           | 1.00           |
| 7 /n/rinn_data1/seq/Igoff/Projects/BrainMap/data/quants/JR827/abundances.cxb  | WT          | 6         | WT_6     | 27786600.00 | 34590000.00 | 0.81           | 1.00           |
| 8 /n/rinn_data1/seq/Igoff/Projects/BrainMap/data/quants/JR778/abundances.cxb  | WT          | 7         | WT_7     | 39541900.00 | 34590000.00 | 1.16           | 1.00           |
| 9 /n/rinn_data1/seq/Igoff/Projects/BrainMap/data/quants/JR734/abundances.cxb  | WT          | 8         | WT_8     | 34480600.00 | 34590000.00 | 1.01           | 1.00           |
| 10 /n/rinn_data1/seq/Igoff/Projects/BrainMap/data/quants/JR802/abundances.cxb | WT          | 9         | WT_9     | 45467400.00 | 34590000.00 | 1.30           | 1.00           |
| 11 /n/rinn_data1/seq/Igoff/Projects/BrainMap/data/quants/JR803/abundances.cxb | WT          | 10        | WT_10    | 52130400.00 | 34590000.00 | 1.51           | 1.00           |
| 12 /n/rinn_data1/seq/Igoff/Projects/BrainMap/data/quants/JR735/abundances.cxb | WT          | 11        | WT_11    | 34994400.00 | 34590000.00 | 1.02           | 1.00           |
| 13 /n/rinn_data1/seq/Igoff/Projects/BrainMap/data/quants/JR785/abundances.cxb | WT          | 12        | WT_12    | 34173600.00 | 34590000.00 | 0.97           | 1.00           |
| 14 /n/rinn_data1/seq/Igoff/Projects/BrainMap/data/quants/JR781/abundances.cxb | WT          | 13        | WT_13    | 41538900.00 | 34590000.00 | 1.21           | 1.00           |
| 15 /n/rinn_data1/seq/Igoff/Projects/BrainMap/data/quants/JR741/abundances.cxb | Cmdc        | 0         | Cmdc_0   | 37686800.00 | 34590000.00 | 1.09           | 1.00           |
| 16 /n/rinn_data1/seq/Igoff/Projects/BrainMap/data/quants/JR784/abundances.cxb | Cmdc        | 1         | Cmdc_1   | 37652200.00 | 34590000.00 | 1.09           | 1.00           |

## Session Info

```
## R version 3.0.2 (2013-09-25)
## Platform: x86_64-unknown-linux-gnu (64-bit)
##
## locale:
## [1] LC_CTYPE=en_US.UTF-8      LC_NUMERIC=C
## [3] LC_TIME=en_US.UTF-8      LC_COLLATE=en_US.UTF-8
## [5] LC_MONETARY=en_US.UTF-8  LC_MESSAGES=en_US.UTF-8
## [7] LC_PAPER=en_US.UTF-8     LC_NAME=C
## [9] LC_ADDRESS=C             LC_TELEPHONE=C
## [11] LC_MEASUREMENT=en_US.UTF-8 LC_IDENTIFICATION=C
##
## attached base packages:
## [1] grid      parallel  methods  stats    graphics grDevices utils
## [8] datasets base
##
## other attached packages:
## [1] plyr_1.8.1
## [2] stringr_0.6.2
## [3] seqbias_1.10.0
## [4] BSgenome.Mmusculus.UCSC.mm10_1.3.19
## [5] BSgenome_1.30.0
## [6] Biostrings_2.30.1
```

```

## [7] gdata_2.13.3
## [8] GO.db_2.10.1
## [9] org.Mm.eg.db_2.10.1
## [10] clusterProfiler_1.13.1
## [11] DOSE_2.0.0
## [12] ReactomePA_1.6.1
## [13] AnnotationDbi_1.24.0
## [14] Biobase_2.22.0
## [15] mgcv_1.7-29
## [16] nlme_3.1-117
## [17] RMySQL_0.9-3
## [18] RColorBrewer_1.0-5
## [19] gridExtra_0.9.1
## [20] gtable_0.1.2
## [21] marray_1.40.0
## [22] gplots_2.13.0
## [23] GSA_1.03
## [24] limma_3.18.13
## [25] xtable_1.7-3
## [26] cummeRbund_2.7.2
## [27] Gviz_1.6.0
## [28] rtracklayer_1.22.7
## [29] GenomicRanges_1.14.4
## [30] XVector_0.2.0
## [31] IRanges_1.20.7
## [32] fastcluster_1.1.13
## [33] reshape2_1.4
## [34] ggplot2_1.0.0
## [35] RSQLite_0.11.4
## [36] DBI_0.2-7
## [37] BiocGenerics_0.8.0
## [38] knitr_1.6
##
## loaded via a namespace (and not attached):
## [1] biomaRt_2.18.0      biovizBase_1.10.8   bitops_1.0-6
## [4] caTools_1.17        cluster_1.15.2      colorspace_1.2-4
## [7] dichromat_2.0-0     digest_0.6.4        DO.db_2.7
## [10] evaluate_0.5.5      formatR_0.10        Formula_1.1-1
## [13] GenomicFeatures_1.14.5 GOsemSim_1.20.3     graph_1.40.1
## [16] graphite_1.8.1      gtools_3.4.1        Hmisc_3.14-4
## [19] igraph_0.7.1        KEGG.db_2.10.1     KernSmooth_2.23-12
## [22] labeling_0.2        lattice_0.20-29     latticeExtra_0.6-26
## [25] MASS_7.3-33        Matrix_1.1-3        munSELL_0.4.2
## [28] org.Hs.eg.db_2.10.1 proto_0.3-10        qvalue_1.36.0
## [31] Rcpp_0.11.2         RCurl_1.95-4.1     reactome.db_1.46.1
## [34] Rsamtools_1.14.3    scales_0.2.4        splines_3.0.2
## [37] stats4_3.0.2        survival_2.37-7     tcltk_3.0.2
## [40] tools_3.0.2         XML_3.98-1.1        zlibbioc_1.8.0

```

## Run Info

```
##          param
## 1      cmd_line
## 2          version
## 3  SVN_revision
## 4  boost_version
## 5          genome
##
## 1 cuffdiff -p 10 -L WT,Crnde -o /n/rinn_data1/seq/lgoff/Projects/BrainMap/data/diffs/Crnde_vs_WT_Adult /n/rinn_data1/seq/lgoff/Projects/BrainMap/data/ar
## 2
## 3
## 4
## 5
```

# Crnde KO vs WT (Embryonic)

This file shows the wt-v-ko comparison for Crnde.

Cuff overview:

```
## CuffSet instance with:  
## 2 samples  
## 26754 genes  
## 77524 isoforms  
## 0 TSS  
## 23066 CDS  
## 0 promoters  
## 0 splicing  
## 19954 relCDS
```

## QC

### Dispersion

Dispersion plot for genes in cuff: (Overdispersion can lead to innacurate quants)

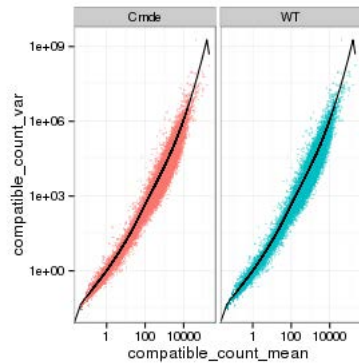

### Cross-replicate variability (fpkmSCVplot)

Differences in CV 2 can result in lower numbers of differentially expressed genes due to a higher degree of variability between replicate fpkm estimates.

Genes:



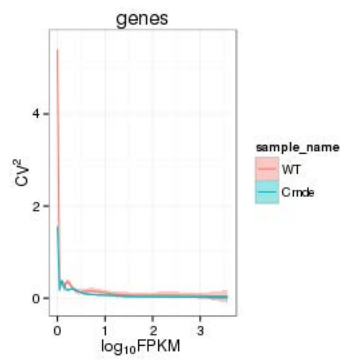

Isoforms:

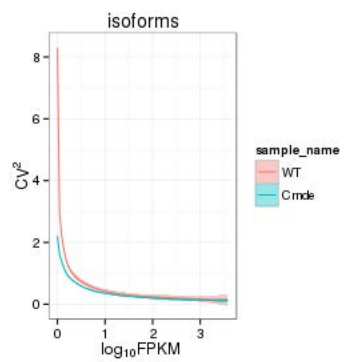

## MvA plot

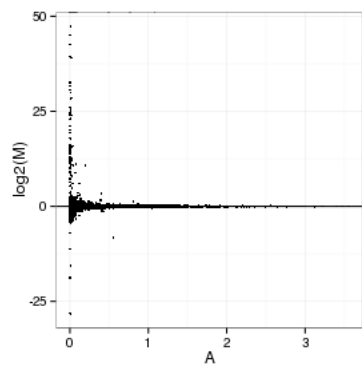

## MvA plot counts

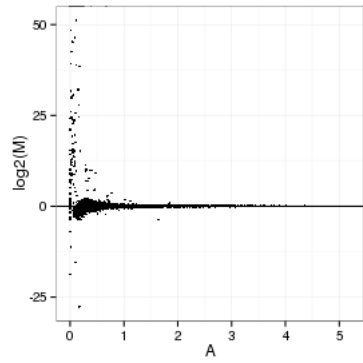

## Scatterplot matrix

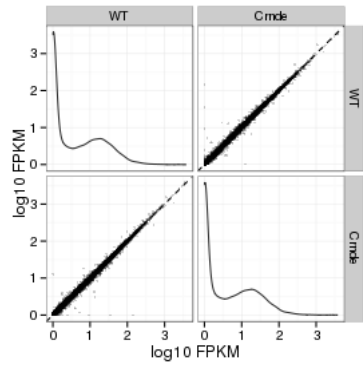

## Distributions

### Boxplots

Boxplot (genes)

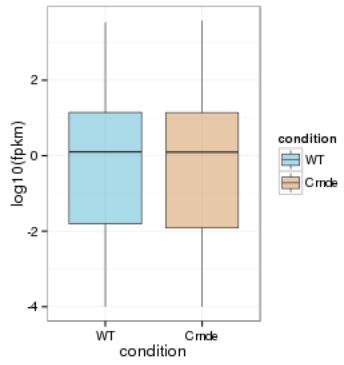

Boxplot (genes, replicates)

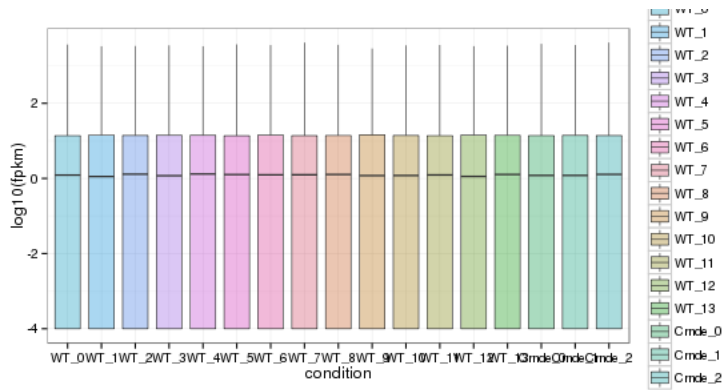

Boxplot (isoforms)

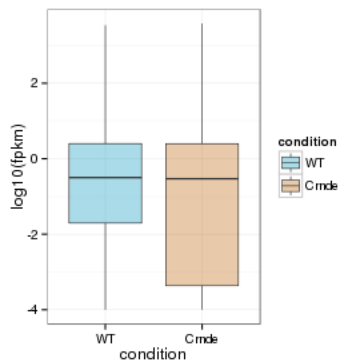

Boxplot (isoforms, replicates)

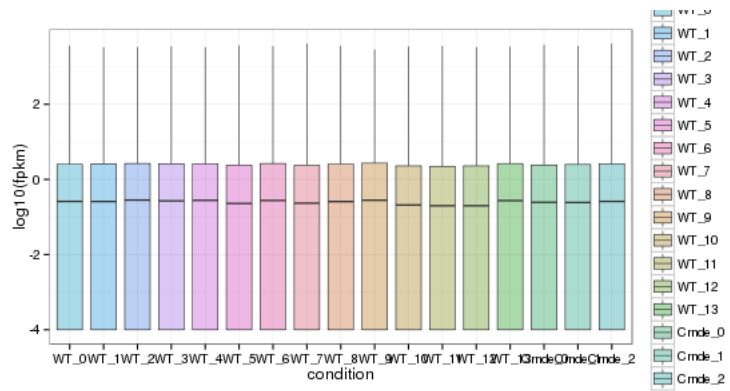

## Density

Density (genes)

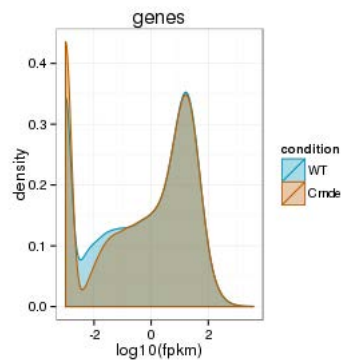

Density (genes, replicates)

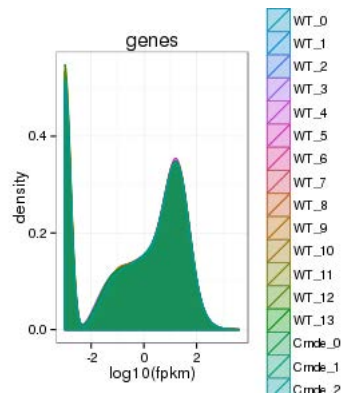

# Clustering

## Replicate Clusters

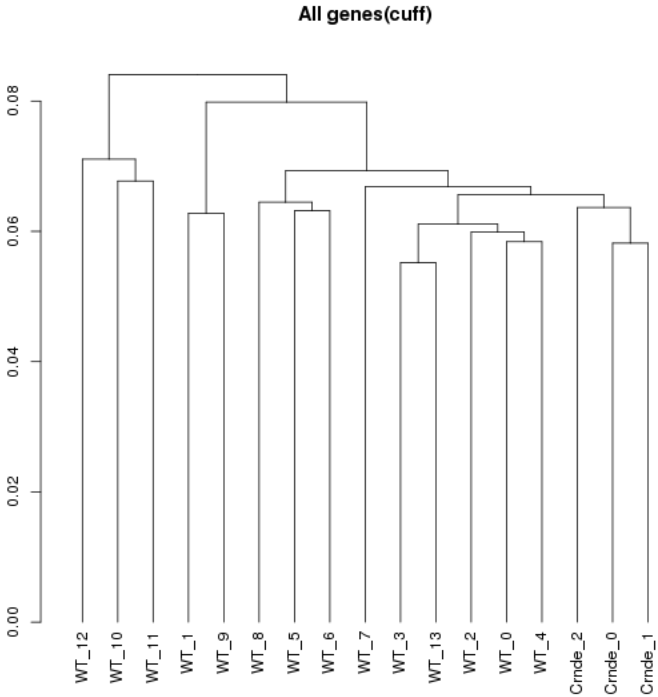

## NULL

## PCA (genes)



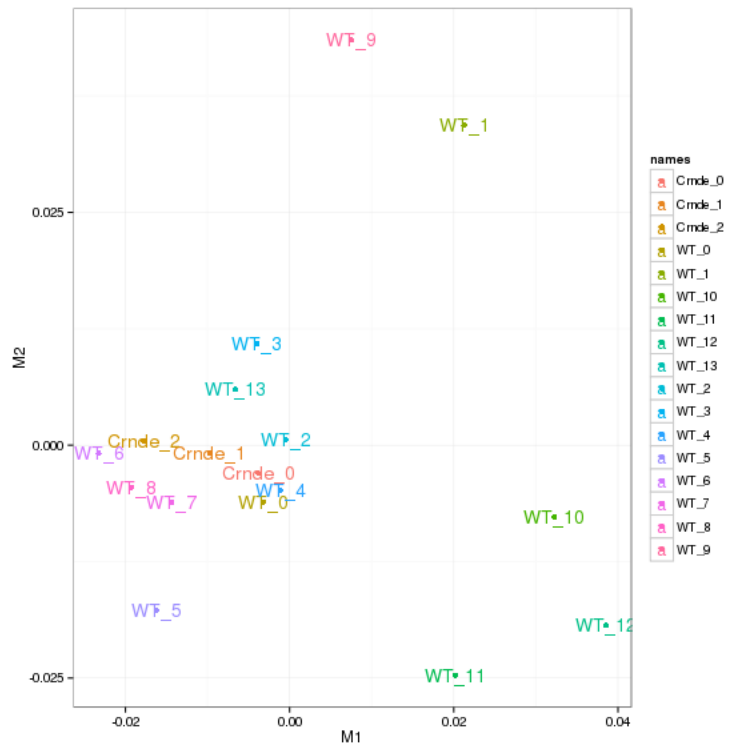

## KO assessment

Endogenous lncRNA expression

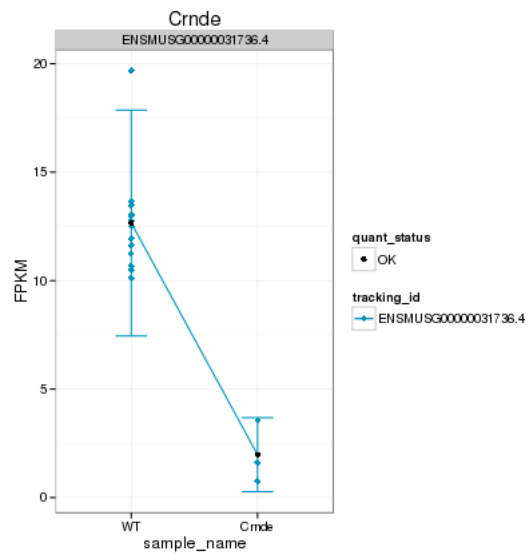

Endogenous expression of Crnde isoforms:



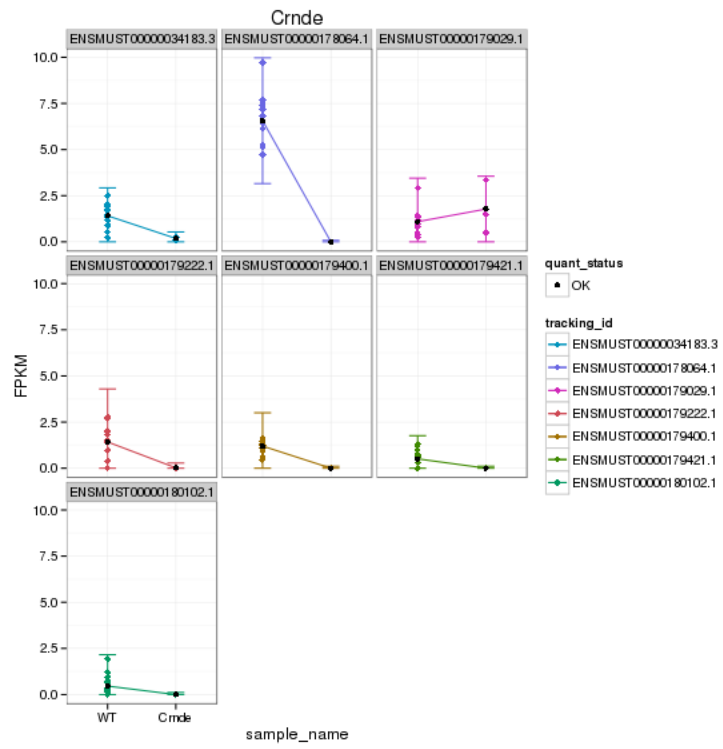

Barplot of gene expression:

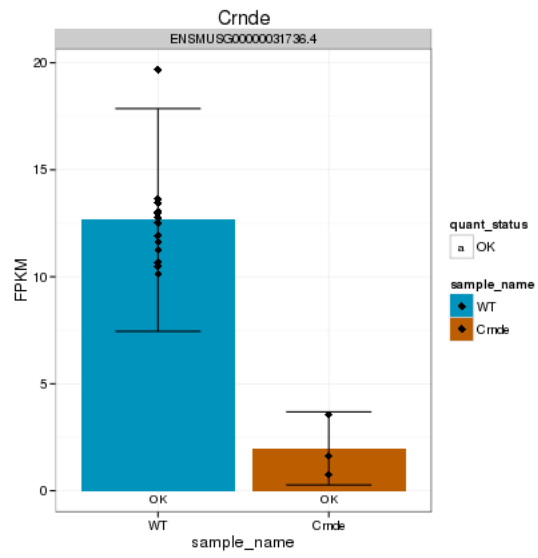

Barplot of isoform expression:

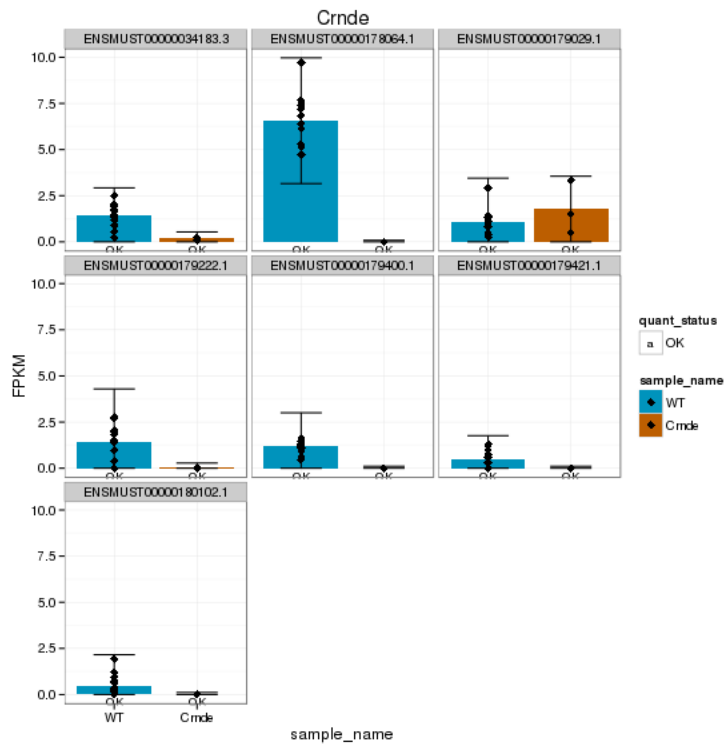

## LacZ expression

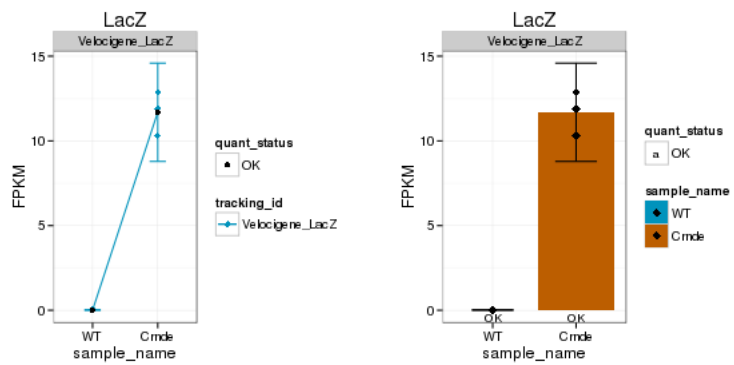

## Digital Genotyping (LacZ vs Endogenous lincRNA and Sex)

Eif2s3y is a y-expressed gene, Xist is an x-expressed gene Expression plot (endogenous linc, lacZ, Y-expressed gene):

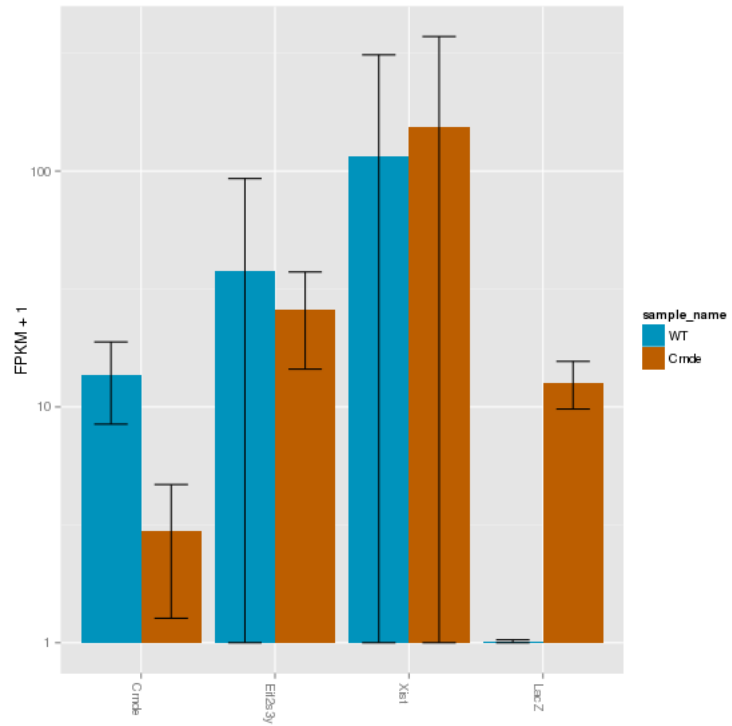

Expression heatmap:

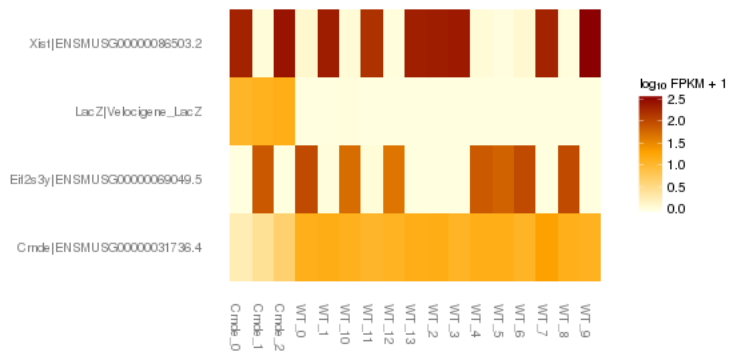

Track visualization

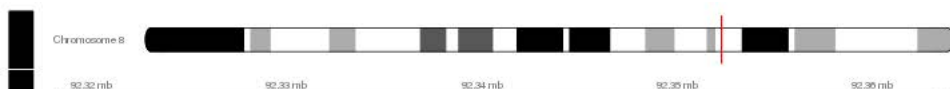

NCBI RefSeq LincRNA isoforms WT\_0 WT\_1 WT\_2 WT\_3 WT\_4 WT\_5 WT\_6 WT\_7 WT\_8 WT\_9 WT\_10 WT\_11 WT\_12 WT\_13 Cntrl\_0 Cntrl\_1 Cntrl\_2 Cntrl\_3 KO Region

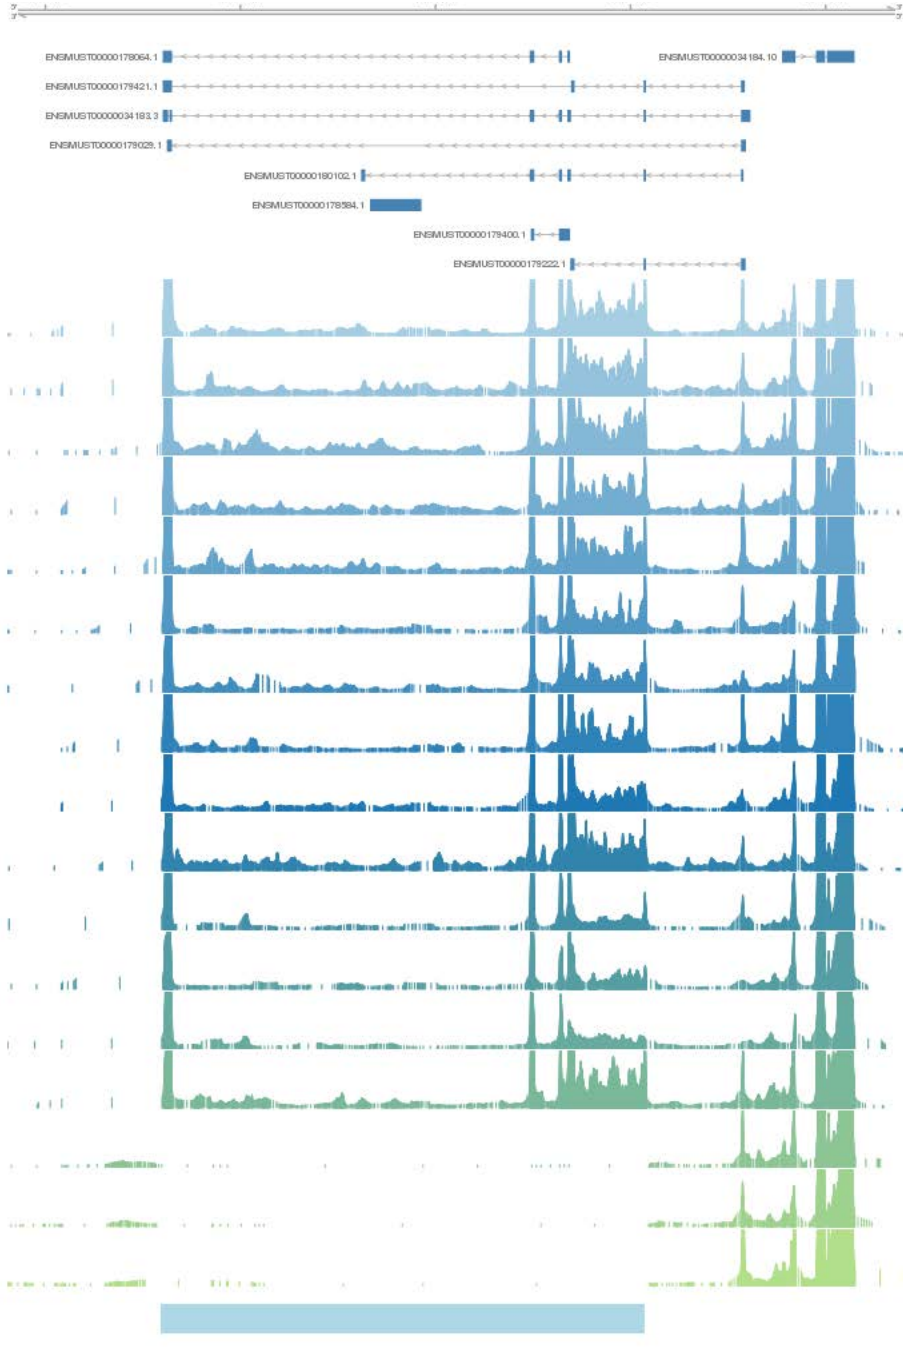

# Differential Analysis

## Differential Genes

There are 80 significantly differentially expressed genes. They are:

**geneAnnot\$gene\_short\_name**

- 1 Col6a1
- 2 Col18a1
- 3 Col1a1
- 4 Lamb1
- 5 Nes
- 6 Polr2a
- 7 Nid1
- 8 Rplp1
- 9 Hspa8
- 10 Sulf1
- 11 Dync1h1
- 12 Lama2
- 13 Col6a2
- 14 Mrc2
- 15 Prpf8
- 16 Ntn1
- 17 Iqgap2
- 18 Nid2
- 19 Myh9
- 20 Igf2r
- 21 Lox
- 22 Fbn2
- 23 Rps14
- 24 Pdgfrb
- 25 Rps26
- 26 Col5a2
- 27 Col3a1
- 28 Fn1
- 29 Lamc1
- 30 Col5a1
- 31 Lamc3
- 32 Notch1
- 33 Lrp2
- 34 Fbn1
- 35 Lrp4
- 36 Notch2
- 37 Tnc

38 Slep1  
39 Sorcs2  
40 Col1a2  
41 Aldh1l1  
42 Emp1  
43 Dera  
  
44 Hddc3  
45 Col4a5  
46 Col4a1  
47 Cmde  
48 Itga11  
49 Lama1  
50 Fras1  
51 Lum  
52 Wnt8b  
53 Frem2  
54 Notch3  
55 Spon1  
56 Neurod2  
57 Satb2  
58 Atp5l  
59 Bend6  
60 Gm9493  
61 Acp1  
62 Mc4r  
63 Gm9846  
64 Hbb-y  
65 Hbb-bh1  
66 Lamb2  
67 Hba-x  
68 Capn11  
69 Alox5ap  
70 Dcc  
  
71 Rps17  
72 Rpl35  
73 Scoc  
74 Rpl36-ps3  
75 3110035E14Rik  
76 Flnc  
77 Ptpnz1  
78 Fat1  
79 Gm26924  
80 Gm19980

## Matrix of gene significant differences between conditions

(skip for Brainmap wt-v-ko comparisons)

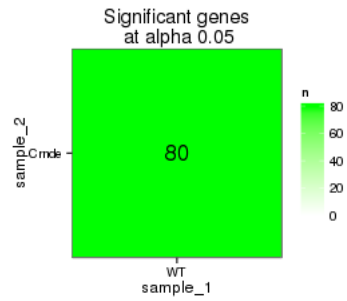

## Significant gene expression differences between conditions

Expression plot (genes):(turned off)



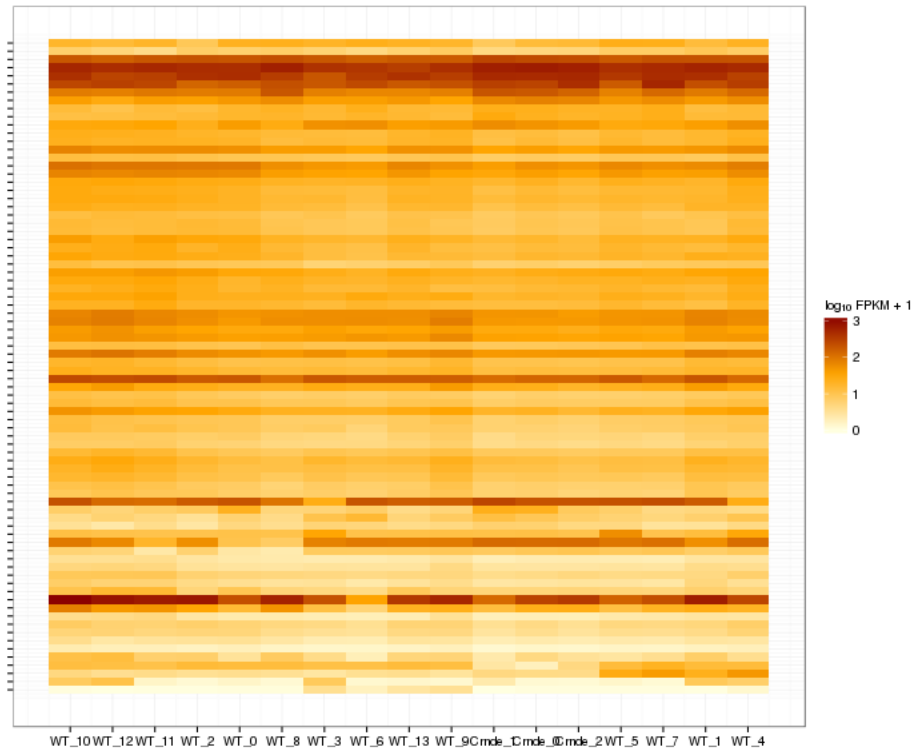

Significant genes with expression >50fpm (any condition):(turned off)

An individual look at each of the highly expressed significantly differentially regulated genes: (eval=false for first pass)

### Expression-level/significance relationship

Scatter plot of significant genes only:

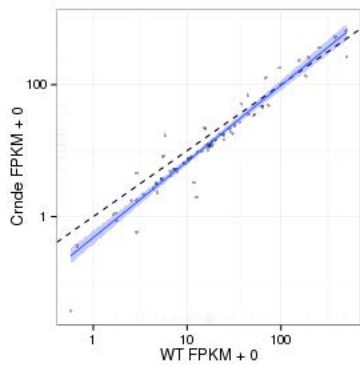

Volcano Plot

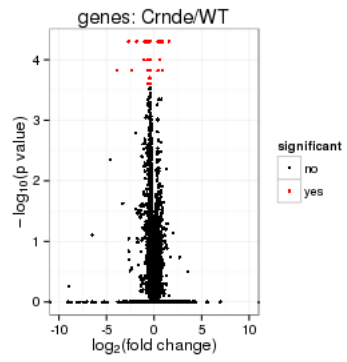

Volcano plot with significant genes only:

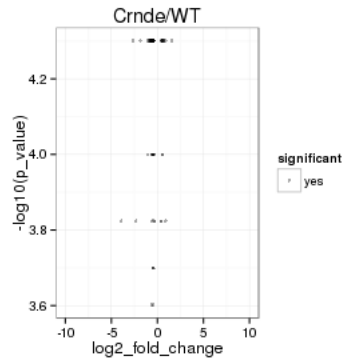

FoldChange Heatmap

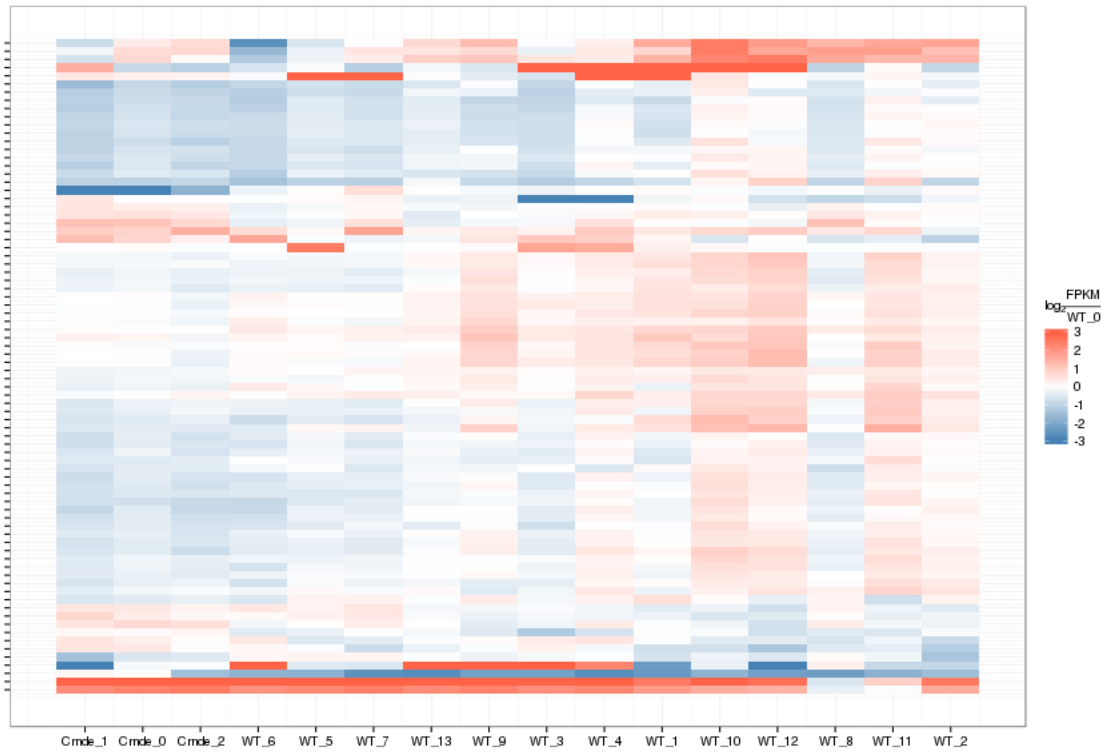

## Differential Splicing

### Differential Isoforms between conditions

Per isoform difference between conditions:

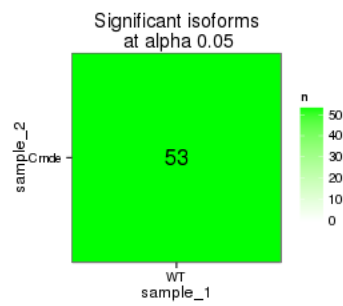

These isoforms are:

| <b>isoAnnot</b> | <b>gene_short_name</b> |
|-----------------|------------------------|
| 1               | Col6a1                 |
| 2               | Col1a1                 |
| 3               | Lamb1                  |
| 4               | Nid1                   |
| 5               | Rplp1                  |
| 6               | Cad                    |
| 7               | Dync1h1                |
| 8               | Lama2                  |
| 9               | Mrc2                   |
| 10              | Myh9                   |
| 11              | Col2a1                 |
| 12              | Igf2r                  |
| 13              | Fbn2                   |
| 14              | Rps14                  |
| 15              | Pdgfrb                 |
| 16              | Col5a2                 |
| 17              | Col3a1                 |
| 18              | Fn1                    |
| 19              | Lamc1                  |
| 20              | Col5a1                 |
| 21              | Lamc3                  |
| 22              | Notch1                 |
| 23              | Lrp2                   |
| 24              | Fbn1                   |
| 25              | Lrp4                   |
| 26              | Notch2                 |
| 27              | Tnc                    |
| 28              | Svep1                  |
| 29              | Sorcs2                 |
| 30              | Col1a2                 |
| 31              | Emp1                   |
| 32              | Dera                   |
| 33              | Hddc3                  |
| 34              | Lama1                  |
| 35              | Fras1                  |
| 36              | Wnt8b                  |
| 37              | Frem2                  |
| 38              | Notch3                 |
| 39              | Neurod2                |
| 40              | Lrp1                   |

- 41 Reln
- 42 Gm9493
- 43 Hjurp
- 44 Mc4r
- 45 Col6a3
- 46 Hbb-y
- 47 Lamb2
- 48 Rpl36-ps3
- 49 3110035E14Rik
- 50 Gpr98
- 51 Fat1
- 52 Col22a1
- 53 Gm26924

Gene-level DE isoform heatmap

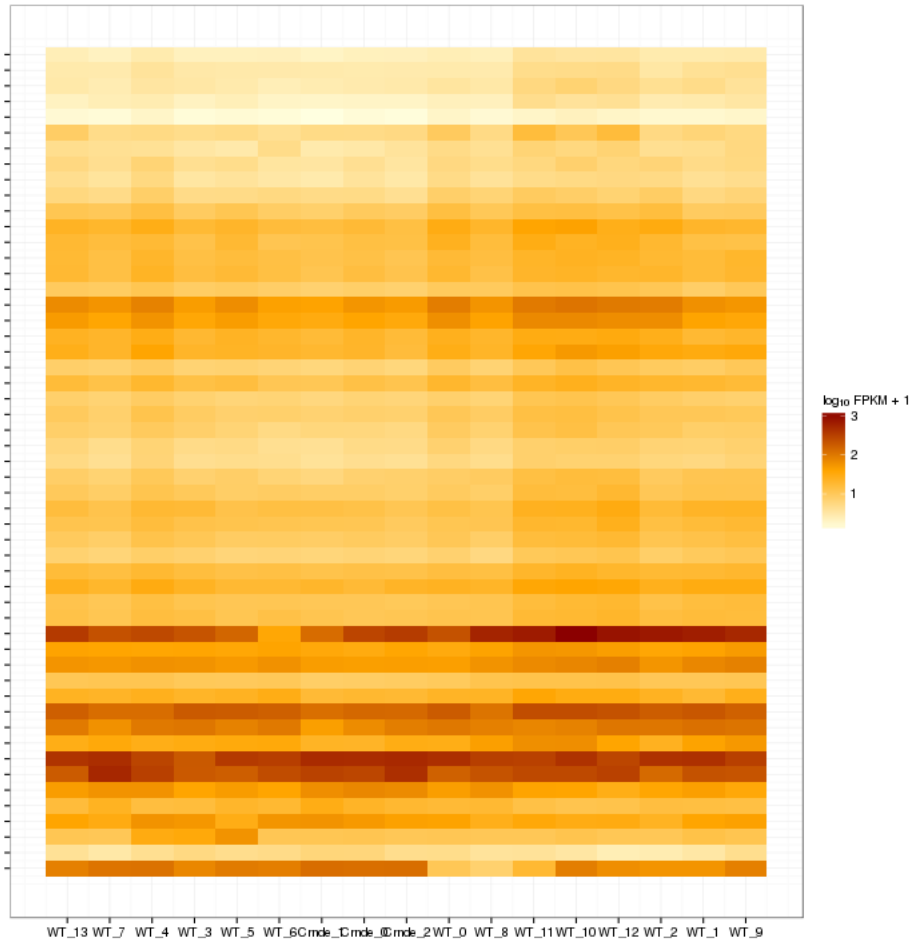

Isoform foldchange heatmap by isoform:

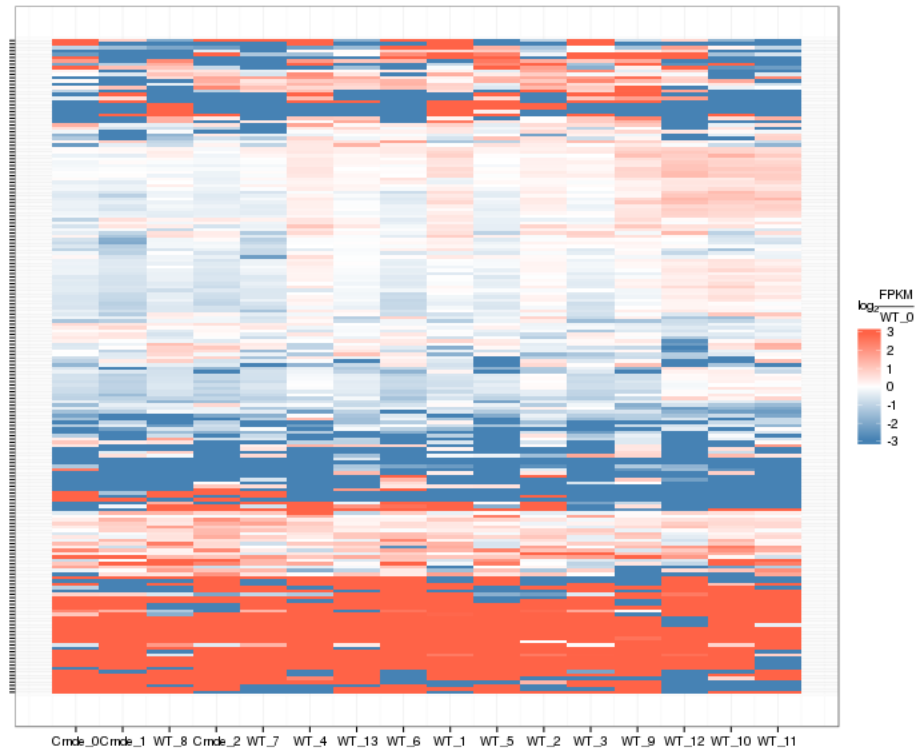

## Differential Splicing between conditions

(eval false for first pass)

Per condition differences in isoforms (Does gene have diff piechart between conditions?)

These genes are:

Splicing heatmap by isoform:

Splicing heatmap by gene

The following are significantly differentially spliced genes (relative portion of isoform per condition):

## Gene/Pathway Analysis

### GSEA

Enrichment and zscores are calculated based on expression in KO vs WT ( $\text{fpkmKO}/\text{fpkmWT}$ ), so genes that are down regulated in KO are shown in blue, while upregulation is shown in red.

KOWT Blue = down in KO Red = Up in KO

Biocarta enrichment:

```
## [1] "Not enough significant categories to print a heatmap!"
```

Biocarta zscore:

```
## [1] "Not enough significant categories to print a heatmap!"
```

Reactome enrichment:

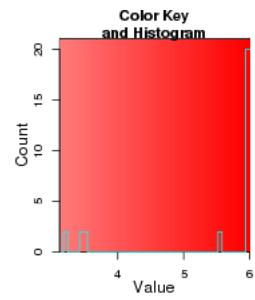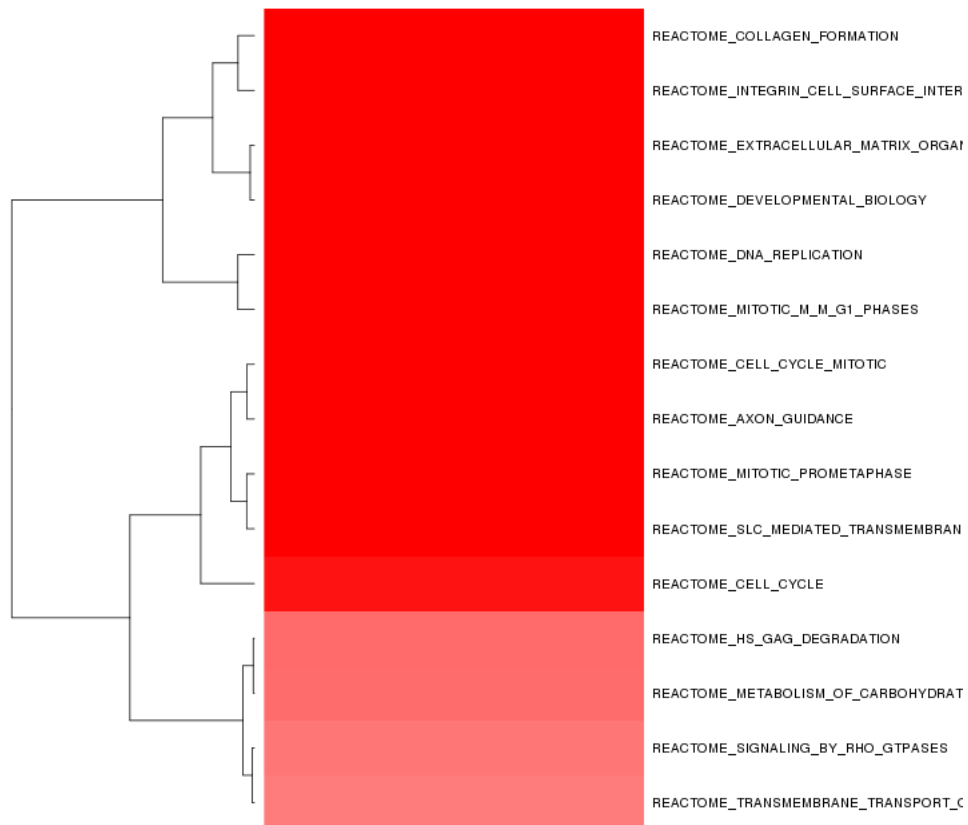



Reactome zscore:

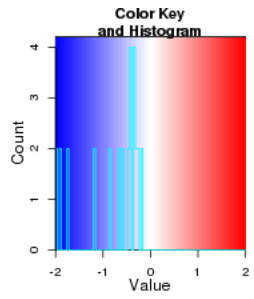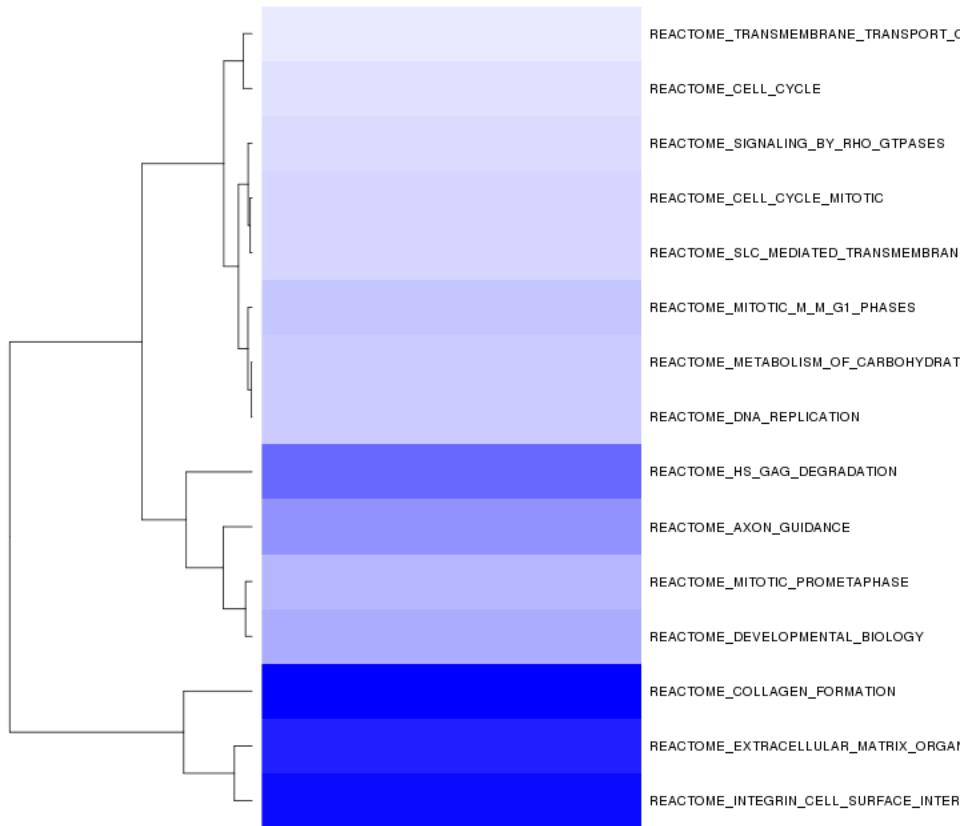

Kegg enrichment:

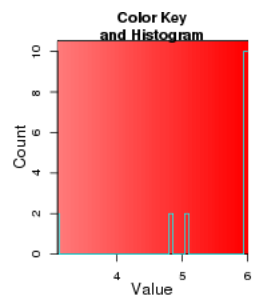

\_\_\_\_\_

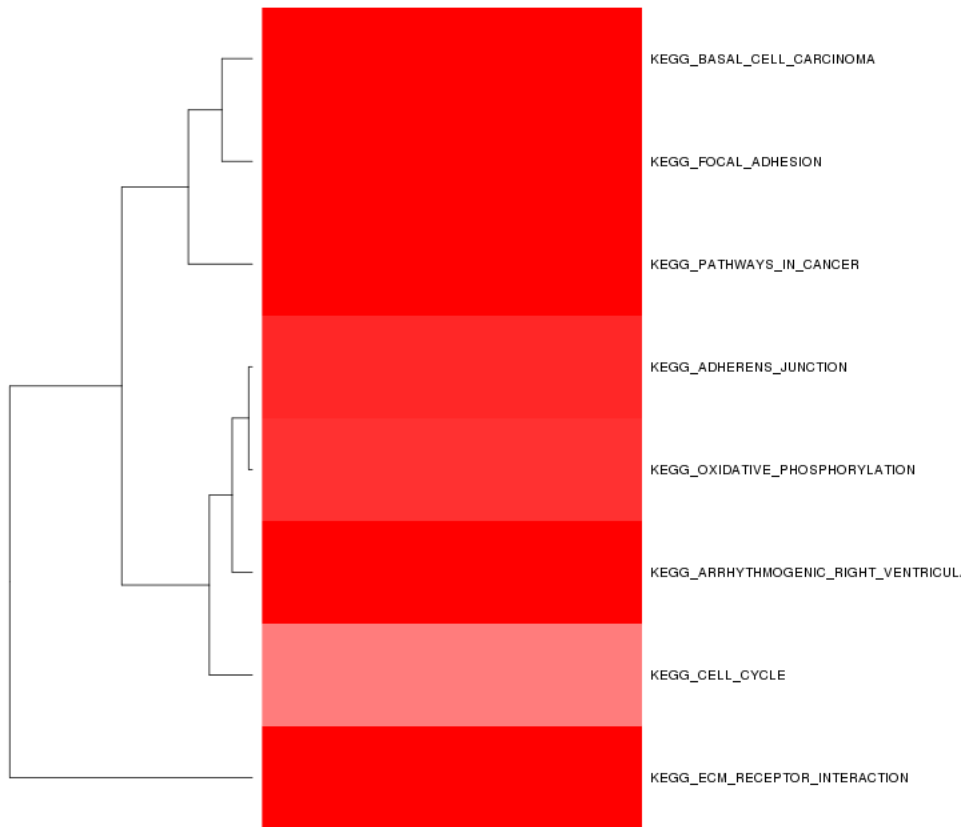

Kegg zscore:

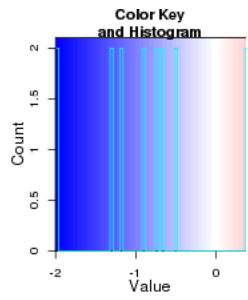

\_\_\_\_\_

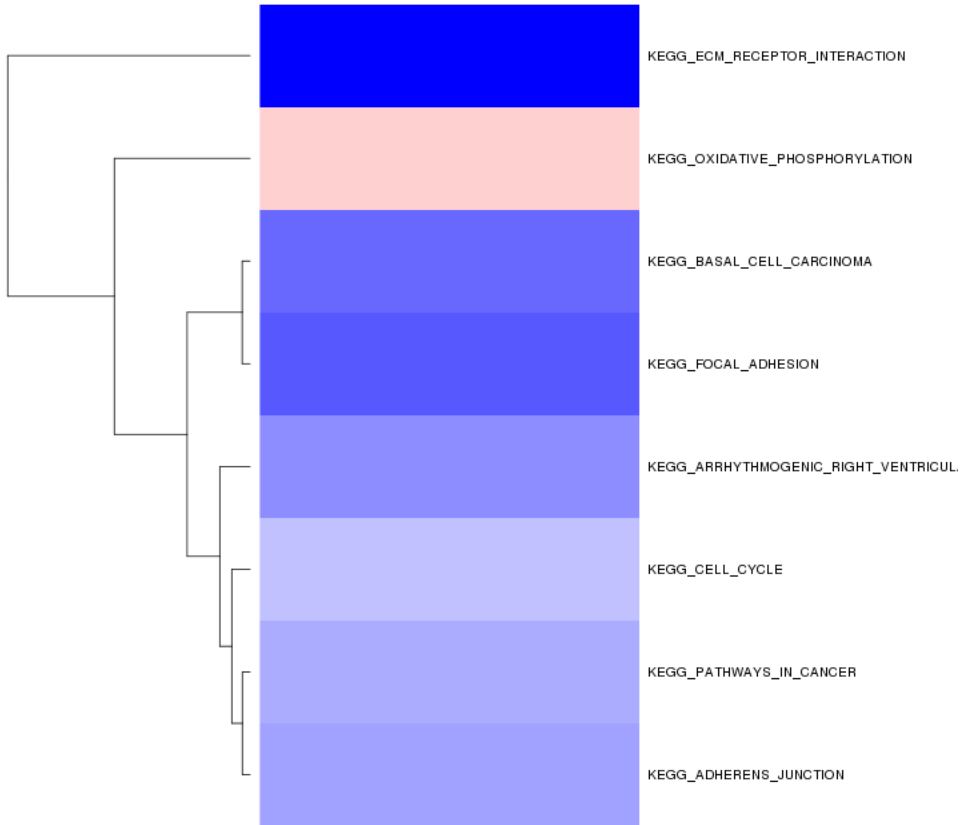

Interneuron enrichment:

## Error: no locations are finite



Lhx6\_genes

5HT\_genes

Interneuron zscore:

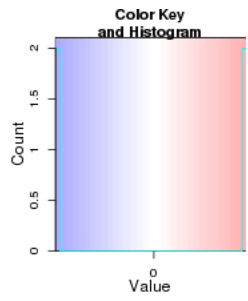

\_\_\_\_\_

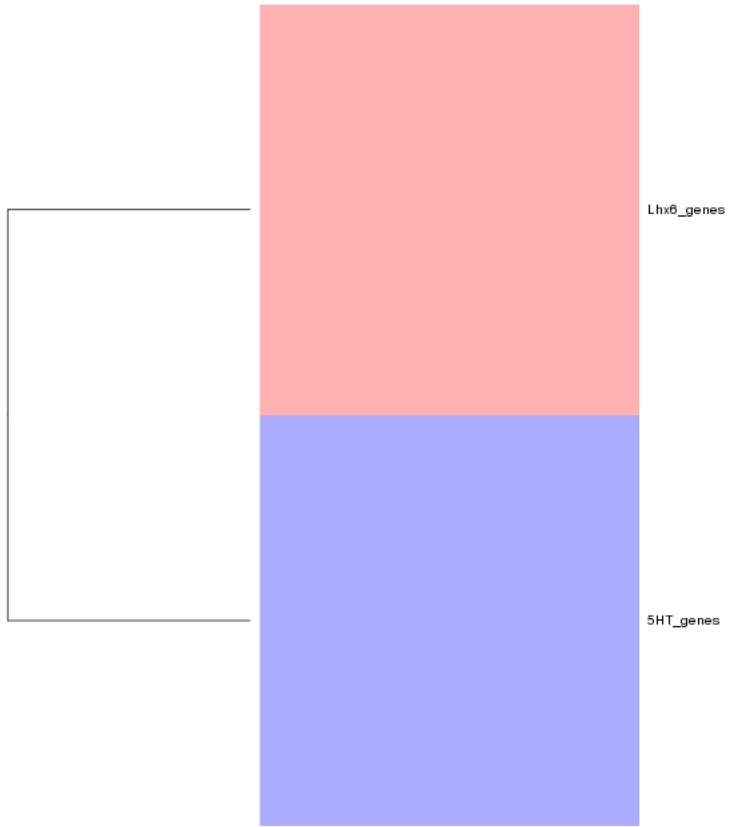

Oncogene enrichment:

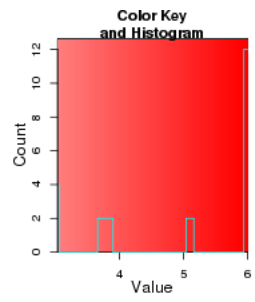

\_\_\_\_\_

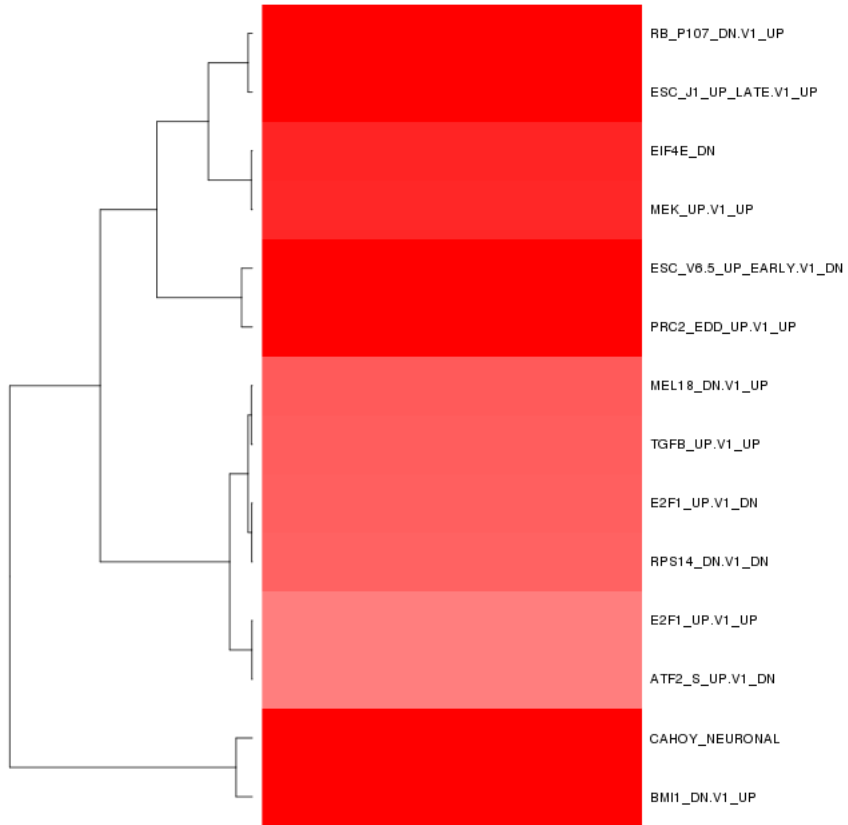

Oncogene zscore:

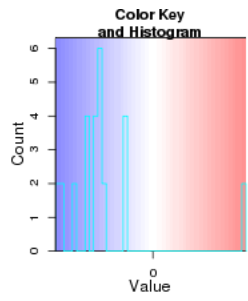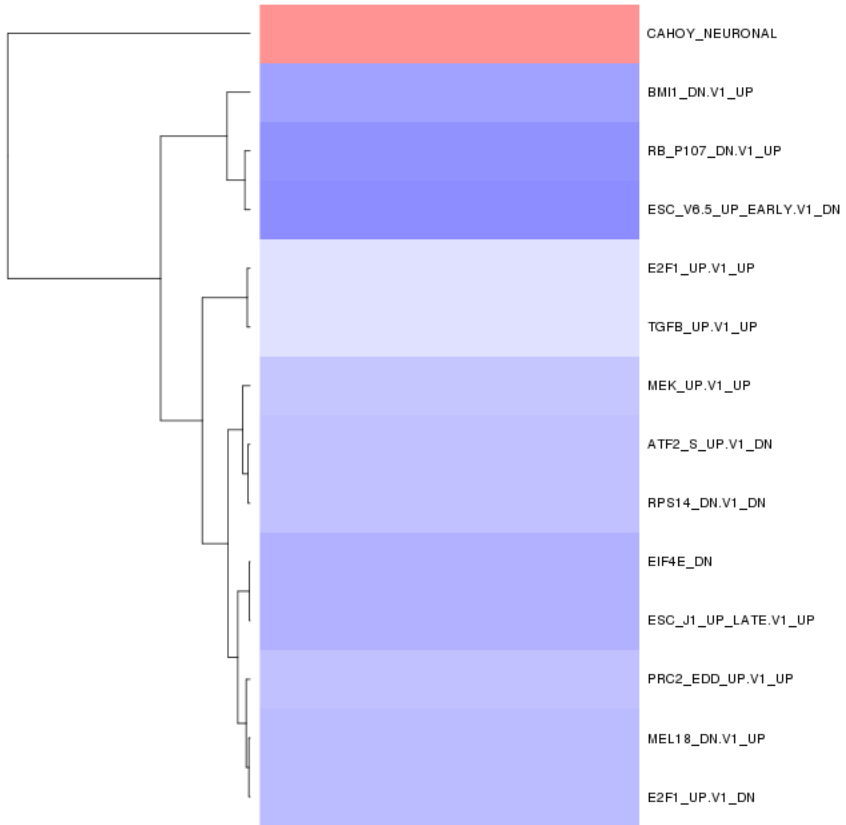

Immuno enrichment:

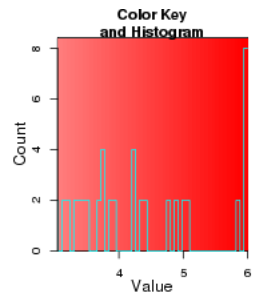

\_\_\_\_\_

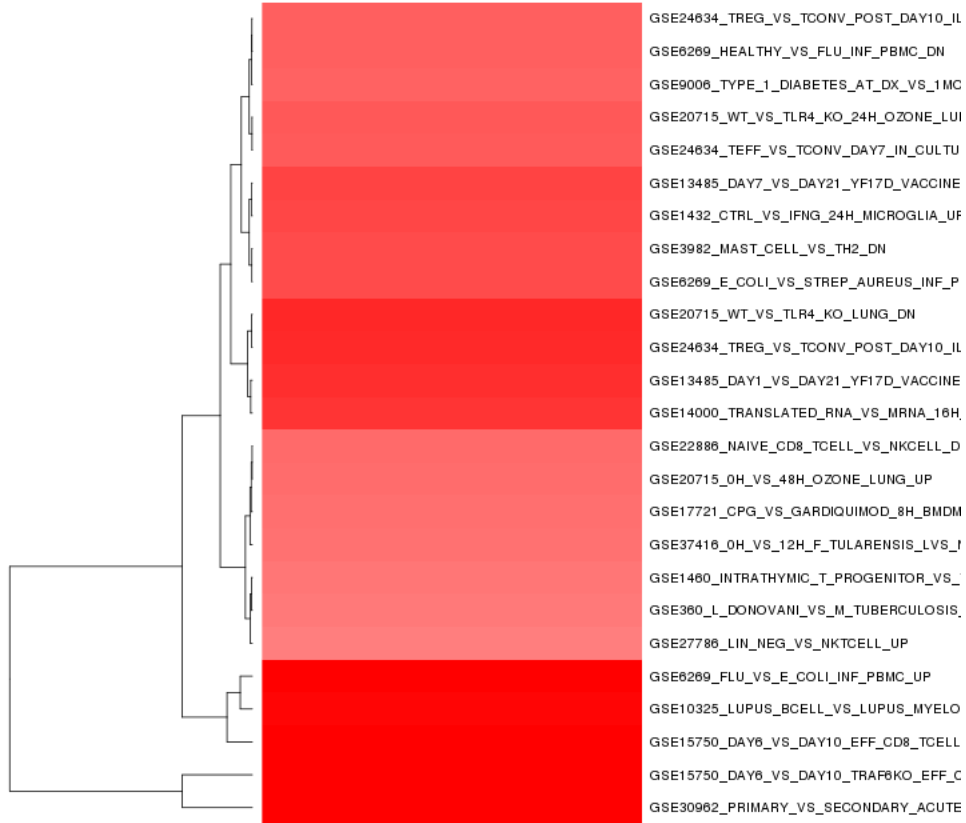

Immuno zscore:



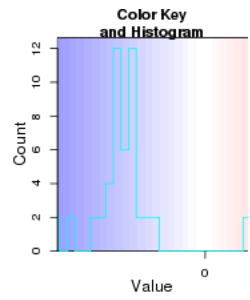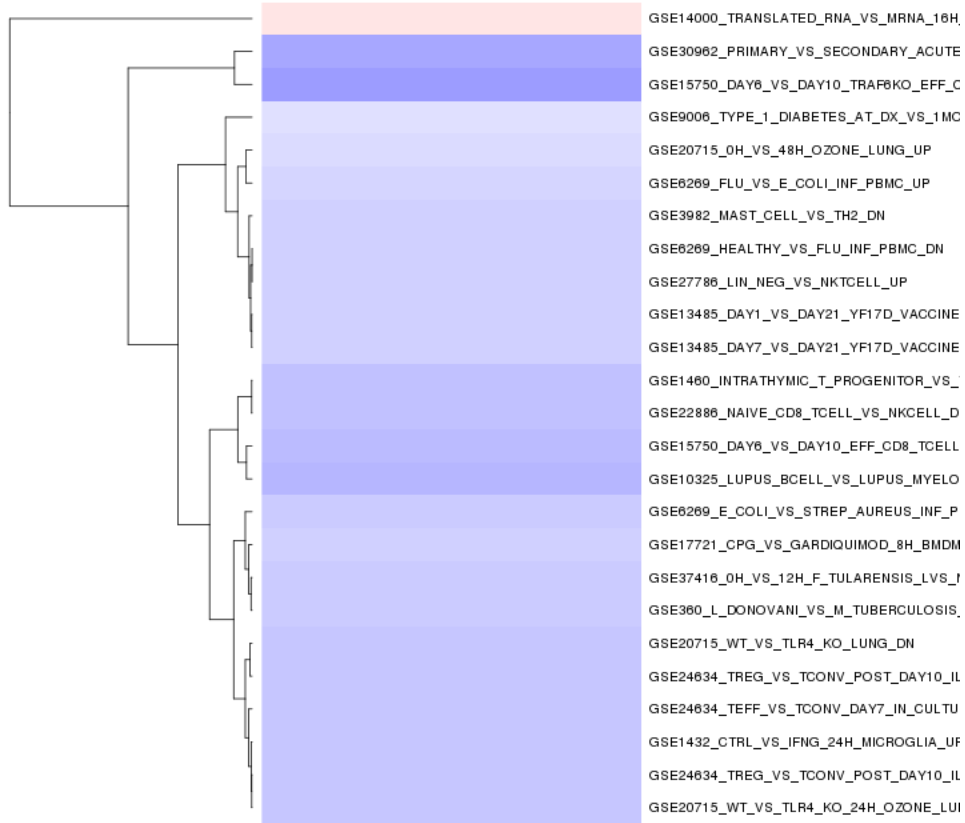

TF enrichment:

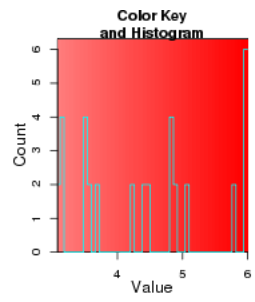

\_\_\_\_\_

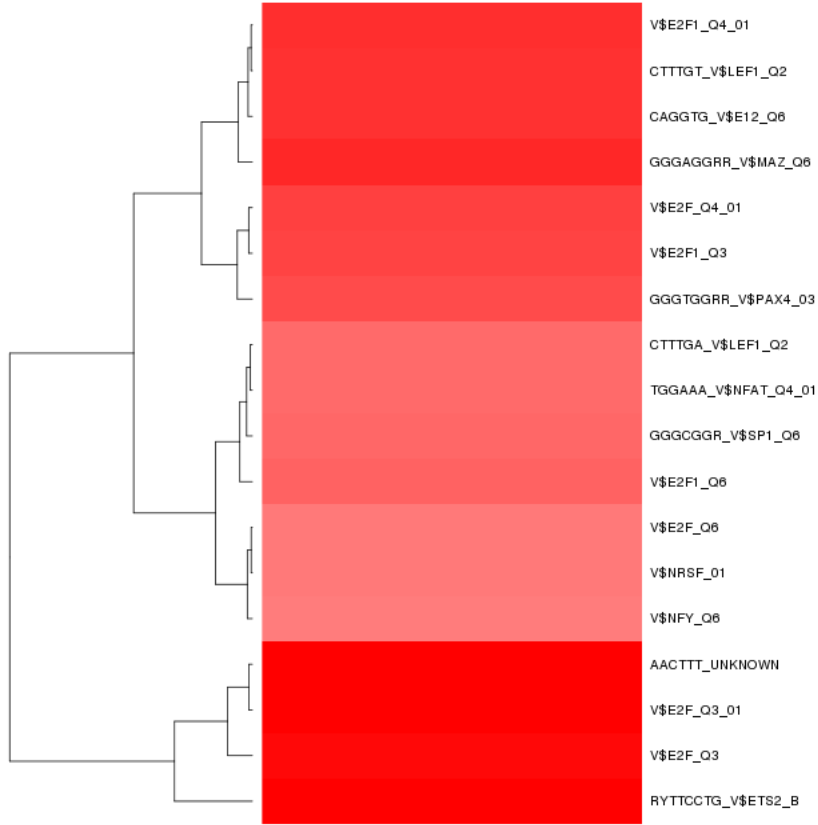

TF zscore:

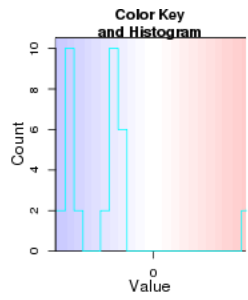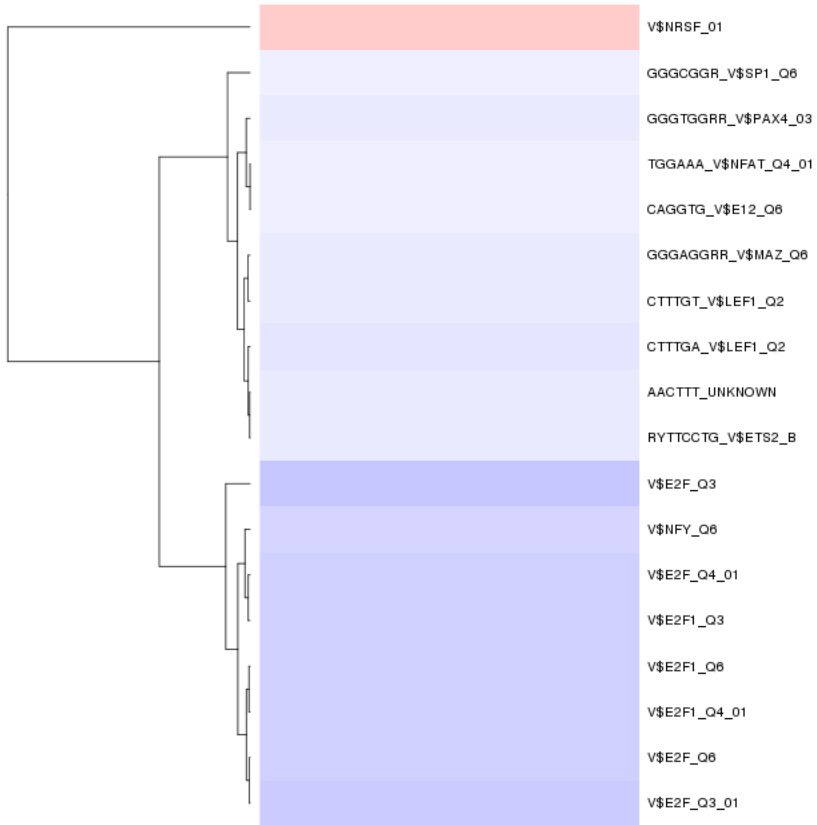

## GO enrichment

Cluster profiler used to call enrichments of significantly differentially regulated genes that map to Entrez IDs.

```
## [1] "ERROR: The estimated pi0 <= 0. Check that you have valid p-values or use another lambda method."
```

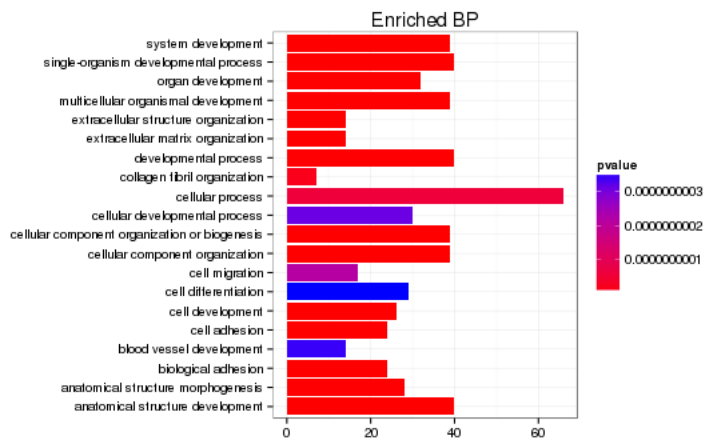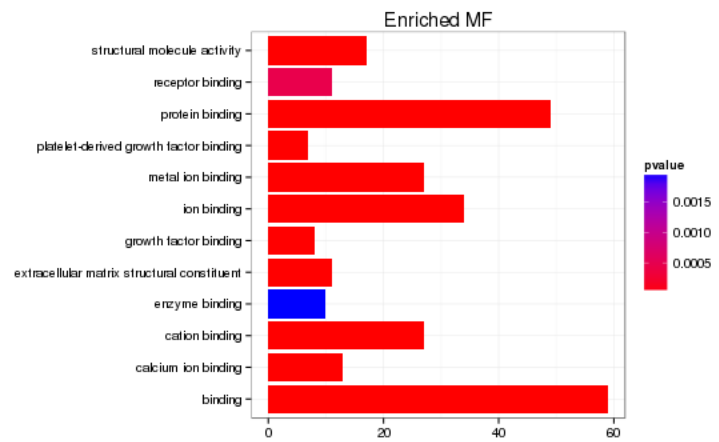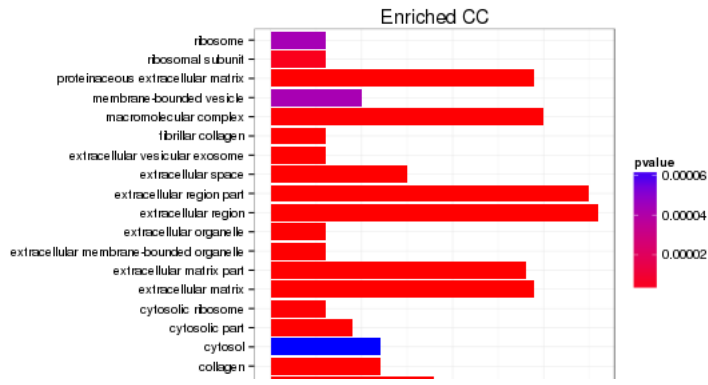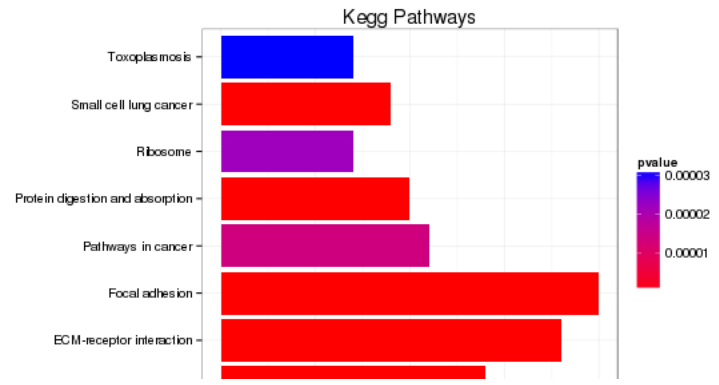

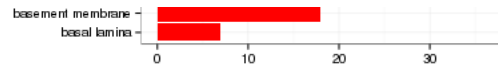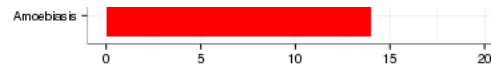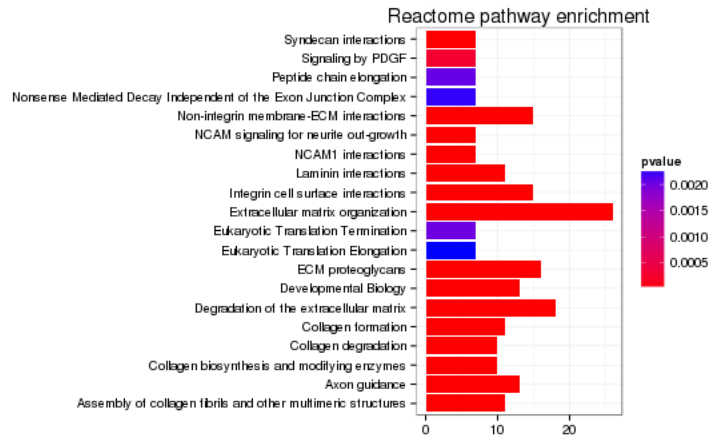

## Enrichment or depletion for stage-specific cell cycle markers

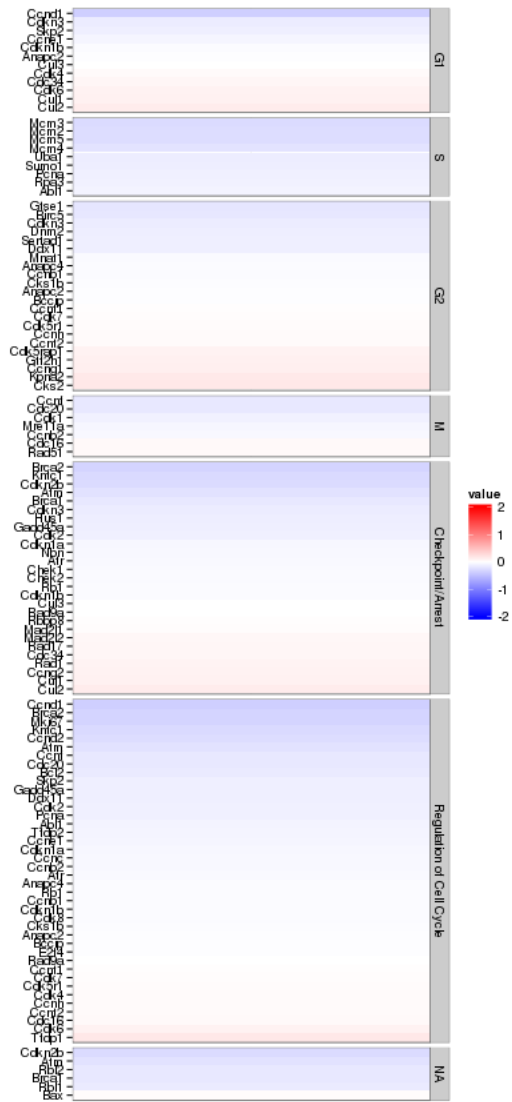

Enrichment or depletion for markers of specific cortical layers

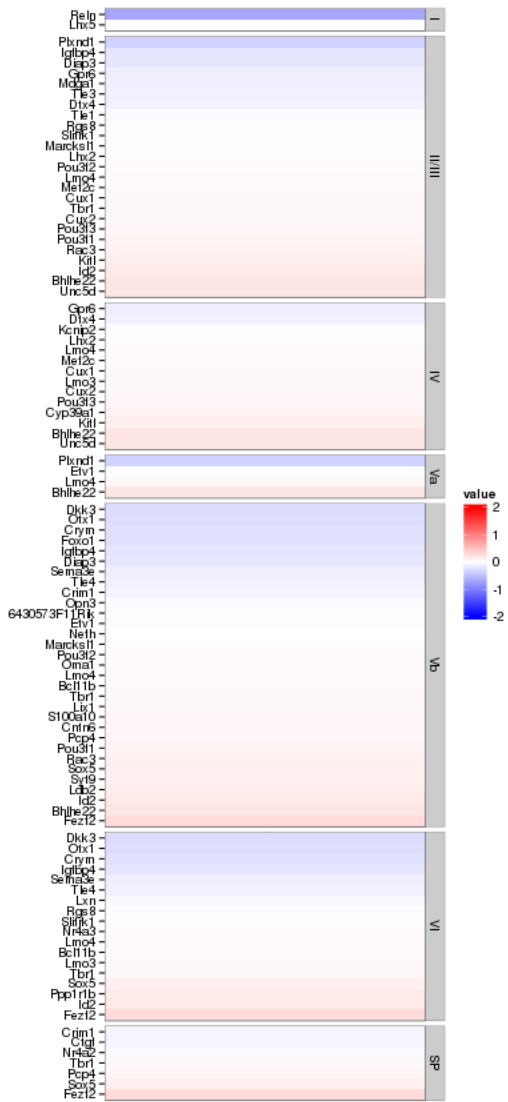

Enrichment or depletion for specific neural cell types

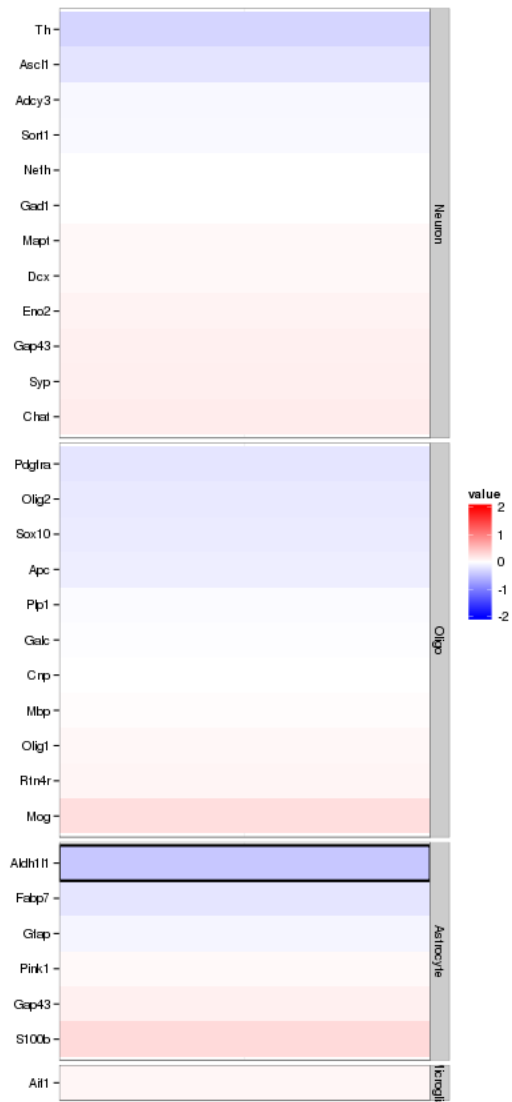

**Enrichment or Depletion of neural differentiation markers**



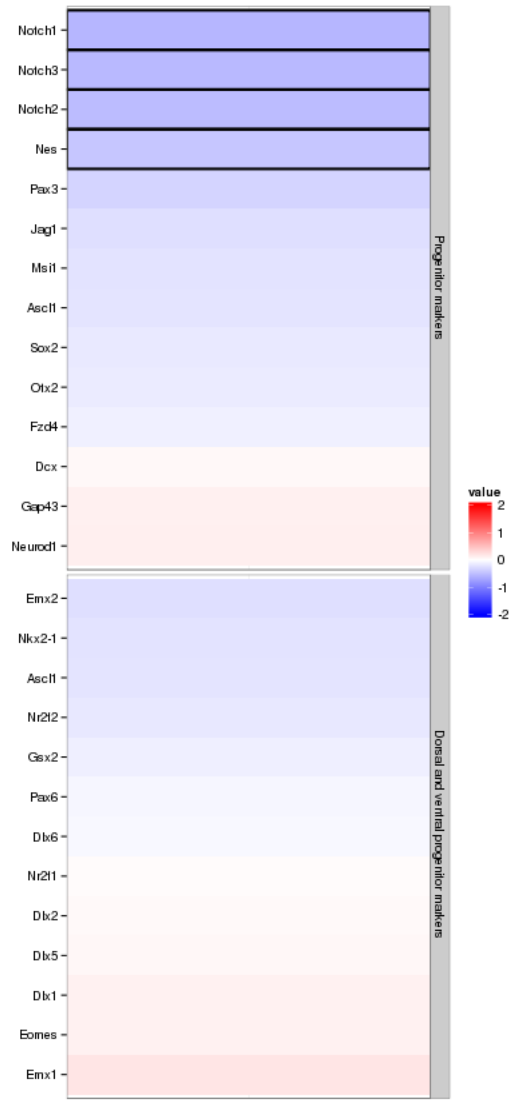

## Cis vs Trans (locally)

$\log_2$  Foldchange and test statistic are calculated with the ratio of  $\text{fpkm(KO)}/\text{fpkm(WT)}$ , thus the  $\text{test\_stat}$  is positive if a gene is higher in the KO and negative if a gene has lower expression in the KO

The pvalue for 0 genes significantly regulated in a region this size is: 1

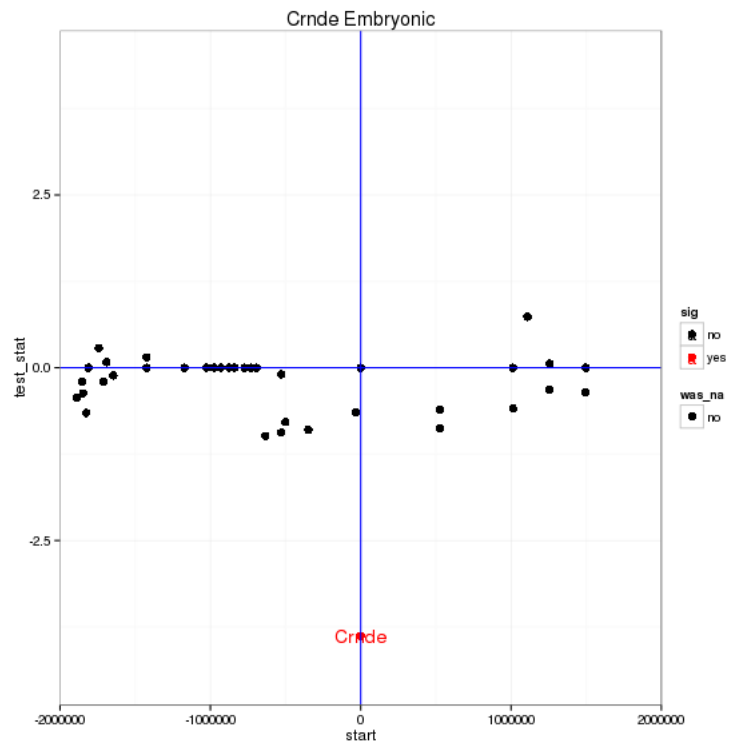

## Notes

Samples used are:

10

- 1 JR753
- 2 JR750
- 3 JR771
- 4 JR755
- 5 JR811
- 6 JR768
- 7 JR761
- 8 JR815
- 9 JR789
- 10 JR748
- 11 JR716
- 12 JR717
- 13 JR719
- 14 JR756

15 JR793  
16 JR790  
17 JR830

## Replicates

| file                                                                          | sample_name | replicate | rep_name | total_mass  | norm_mass   | internal_scale | external_scale |
|-------------------------------------------------------------------------------|-------------|-----------|----------|-------------|-------------|----------------|----------------|
| 1 /n/rinn_data1/seq/igoff/Projects/BrainMap/data/quants/JR753/abundances.cxb  | WT          | 0         | WT_0     | 39331900.00 | 31799500.00 | 1.28           | 1.00           |
| 2 /n/rinn_data1/seq/igoff/Projects/BrainMap/data/quants/JR750/abundances.cxb  | WT          | 1         | WT_1     | 36031100.00 | 31799500.00 | 1.11           | 1.00           |
| 3 /n/rinn_data1/seq/igoff/Projects/BrainMap/data/quants/JR771/abundances.cxb  | WT          | 2         | WT_2     | 38857100.00 | 31799500.00 | 1.24           | 1.00           |
| 4 /n/rinn_data1/seq/igoff/Projects/BrainMap/data/quants/JR755/abundances.cxb  | WT          | 3         | WT_3     | 41811300.00 | 31799500.00 | 1.30           | 1.00           |
| 5 /n/rinn_data1/seq/igoff/Projects/BrainMap/data/quants/JR811/abundances.cxb  | WT          | 4         | WT_4     | 38172800.00 | 31799500.00 | 1.22           | 1.00           |
| 6 /n/rinn_data1/seq/igoff/Projects/BrainMap/data/quants/JR768/abundances.cxb  | WT          | 5         | WT_5     | 28375200.00 | 31799500.00 | 0.90           | 1.00           |
| 7 /n/rinn_data1/seq/igoff/Projects/BrainMap/data/quants/JR761/abundances.cxb  | WT          | 6         | WT_6     | 31706200.00 | 31799500.00 | 0.99           | 1.00           |
| 8 /n/rinn_data1/seq/igoff/Projects/BrainMap/data/quants/JR815/abundances.cxb  | WT          | 7         | WT_7     | 29733100.00 | 31799500.00 | 0.93           | 1.00           |
| 9 /n/rinn_data1/seq/igoff/Projects/BrainMap/data/quants/JR789/abundances.cxb  | WT          | 8         | WT_8     | 27681500.00 | 31799500.00 | 0.87           | 1.00           |
| 10 /n/rinn_data1/seq/igoff/Projects/BrainMap/data/quants/JR748/abundances.cxb | WT          | 9         | WT_9     | 32367000.00 | 31799500.00 | 0.97           | 1.00           |
| 11 /n/rinn_data1/seq/igoff/Projects/BrainMap/data/quants/JR716/abundances.cxb | WT          | 10        | WT_10    | 26144700.00 | 31799500.00 | 0.82           | 1.00           |
| 12 /n/rinn_data1/seq/igoff/Projects/BrainMap/data/quants/JR717/abundances.cxb | WT          | 11        | WT_11    | 25565400.00 | 31799500.00 | 0.81           | 1.00           |
| 13 /n/rinn_data1/seq/igoff/Projects/BrainMap/data/quants/JR719/abundances.cxb | WT          | 12        | WT_12    | 22697800.00 | 31799500.00 | 0.69           | 1.00           |
| 14 /n/rinn_data1/seq/igoff/Projects/BrainMap/data/quants/JR756/abundances.cxb | WT          | 13        | WT_13    | 38948900.00 | 31799500.00 | 1.23           | 1.00           |
| 15 /n/rinn_data1/seq/igoff/Projects/BrainMap/data/quants/JR793/abundances.cxb | Cmde        | 0         | Cmde_0   | 36520100.00 | 31799500.00 | 1.16           | 1.00           |
| 16 /n/rinn_data1/seq/igoff/Projects/BrainMap/data/quants/JR790/abundances.cxb | Cmde        | 1         | Cmde_1   | 27555700.00 | 31799500.00 | 0.87           | 1.00           |
| 17 /n/rinn_data1/seq/igoff/Projects/BrainMap/data/quants/JR830/abundances.cxb | Cmde        | 2         | Cmde_2   | 28630200.00 | 31799500.00 | 0.91           | 1.00           |

## Session Info

```
## R version 3.0.2 (2013-09-25)
## Platform: x86_64-unknown-linux-gnu (64-bit)
##
## locale:
## [1] LC_CTYPE=en_US.UTF-8      LC_NUMERIC=C
## [3] LC_TIME=en_US.UTF-8      LC_COLLATE=en_US.UTF-8
## [5] LC_MONETARY=en_US.UTF-8  LC_MESSAGES=en_US.UTF-8
## [7] LC_PAPER=en_US.UTF-8     LC_NAME=C
## [9] LC_ADDRESS=C             LC_TELEPHONE=C
## [11] LC_MEASUREMENT=en_US.UTF-8 LC_IDENTIFICATION=C
##
## attached base packages:
## [1] grid      parallel  methods  stats    graphics grDevices utils
## [8] datasets base
##
## other attached packages:
## [1] plyr_1.8.1
## [2] stringr_0.6.2
## [3] seqbias_1.10.0
```

```

## [4] BSgenome.Mmusculus.UCSC.mm10_1.3.19
## [5] BSgenome_1.30.0
## [6] Biostrings_2.30.1
## [7] gdata_2.13.3
## [8] GO.db_2.10.1
## [9] org.Mm.eg.db_2.10.1
## [10] clusterProfiler_1.13.1
## [11] DOSE_2.0.0
## [12] ReactomePA_1.6.1
## [13] AnnotationDbi_1.24.0
## [14] Biobase_2.22.0
## [15] mgcv_1.7-29
## [16] nlme_3.1-117
## [17] RMySQL_0.9-3
## [18] RColorBrewer_1.0-5
## [19] gridExtra_0.9.1
## [20] gtable_0.1.2
## [21] marray_1.40.0
## [22] gplots_2.13.0
## [23] GSA_1.03
## [24] limma_3.18.13
## [25] xtable_1.7-3
## [26] cummeRbund_2.7.2
## [27] Gviz_1.6.0
## [28] rtracklayer_1.22.7
## [29] GenomicRanges_1.14.4
## [30] XVector_0.2.0
## [31] IRanges_1.20.7
## [32] fastcluster_1.1.13
## [33] reshape2_1.4
## [34] ggplot2_1.0.0
## [35] RSQLite_0.11.4
## [36] DBI_0.2-7
## [37] BiocGenerics_0.8.0
## [38] knitr_1.6
##
## loaded via a namespace (and not attached):
## [1] biomaRt_2.18.0      biovizBase_1.10.8   bitops_1.0-6
## [4] caTools_1.17        cluster_1.15.2      colorspace_1.2-4
## [7] dichromat_2.0-0     digest_0.6.4        DO.db_2.7
## [10] evaluate_0.5.5      formatR_0.10        Formula_1.1-1
## [13] GenomicFeatures_1.14.5 GOsemSim_1.20.3     graph_1.40.1
## [16] graphite_1.8.1      gtools_3.4.1        Hmisc_3.14-4
## [19] igraph_0.7.1        KEGG.db_2.10.1     KernSmooth_2.23-12
## [22] labeling_0.2        lattice_0.20-29     latticeExtra_0.6-26
## [25] MASS_7.3-33         Matrix_1.1-3        munsell_0.4.2
## [28] org.Hs.eg.db_2.10.1 proto_0.3-10        qvalue_1.36.0
## [31] Rcpp_0.11.2         RCurl_1.95-4.1     reactome.db_1.46.1
## [34] Rsamtools_1.14.3    scales_0.2.4        splines_3.0.2
## [37] stats4_3.0.2        survival_2.37-7     tcltk_3.0.2
## [40] tools_3.0.2         XML_3.98-1.1       zlibbioc_1.8.0

```

## Run Info

```
##          param
## 1      cmd_line
## 2          version
## 3  SVN_revision
## 4  boost_version
## 5          genome
##
## 1 cuffdiff -p 10 -L WT,Crnde -o /n/rinn_data1/seq/lgoff/Projects/BrainMap/data/diffs/Crnde_vs_WT_Embryonic /n/rinn_data1/seq/lgoff/Projects/BrainMap/dat
## 2
## 3
## 4
## 5
```

# Eldr KO vs WT (Adult)

This file shows the wt-v-ko comparison for Eldr.

Cuff overview:

```
## CuffSet instance with:  
## 2 samples  
## 26754 genes  
## 77524 isoforms  
## 0 TSS  
## 23066 CDS  
## 0 promoters  
## 0 splicing  
## 19954 relCDS
```

## QC

### Dispersion

Dispersion plot for genes in cuff: (Overdispersion can lead to innacurate quants)

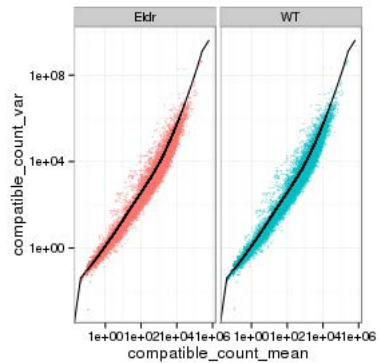

### Cross-replicate variability (fpkmSCVplot)

Differences in CV 2 can result in lower numbers of differentially expressed genes due to a higher degree of variability between replicate fpkm estimates.

Genes:

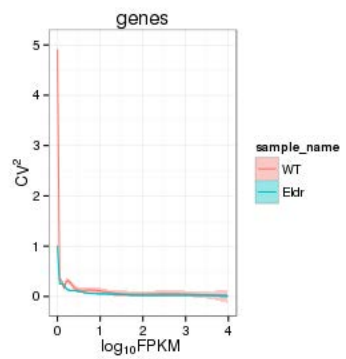

Isoforms:

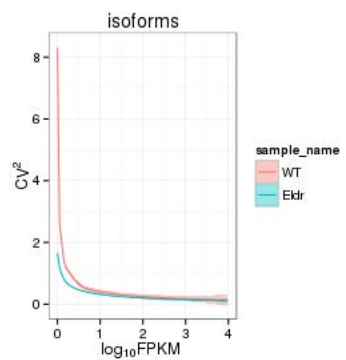

## MvA plot

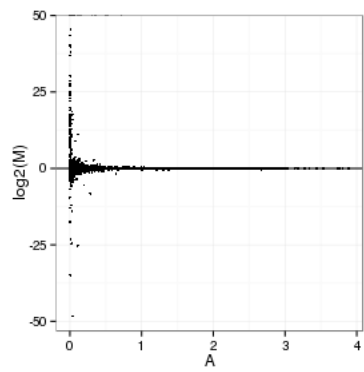

MvA plot counts

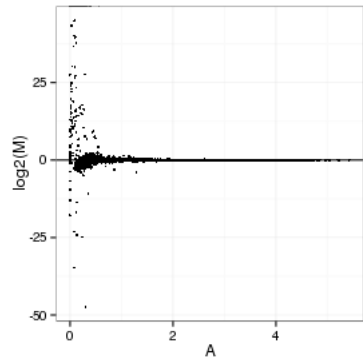

## Scatterplot matrix

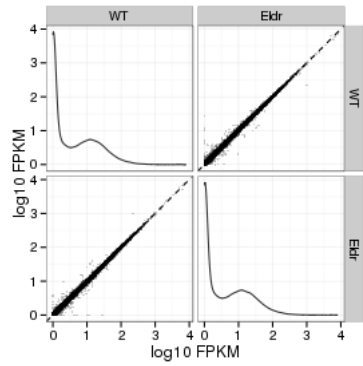

## Distributions

### Boxplots

Boxplot (genes)



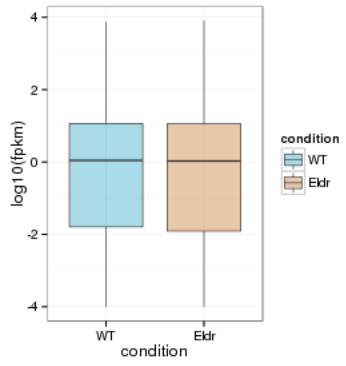

Boxplot (genes, replicates)

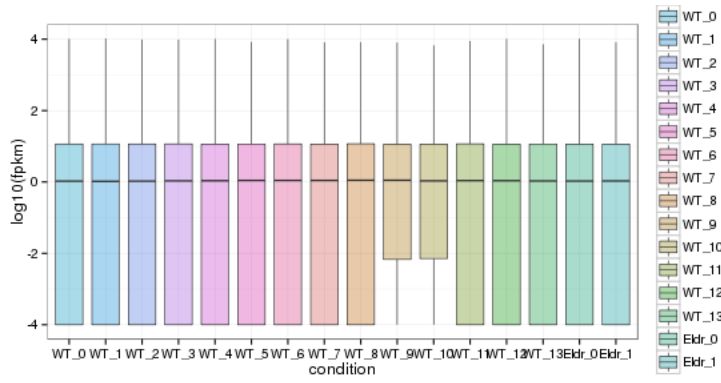

Boxplot (isoforms)

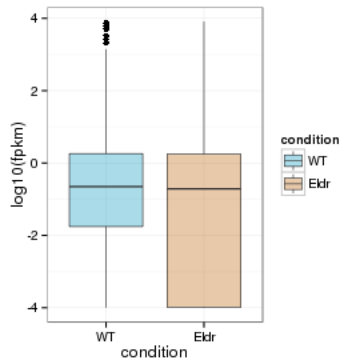

Boxplot (isoforms, replicates)

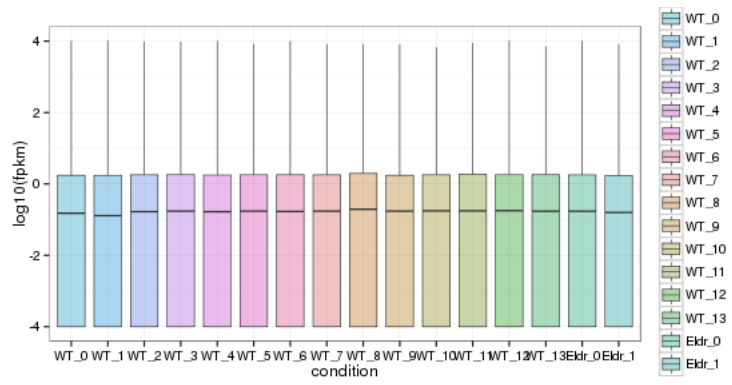

## Density

Density (genes)

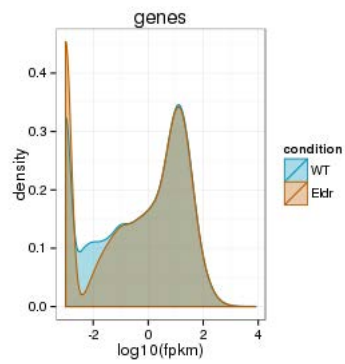

Density (genes, replicates)

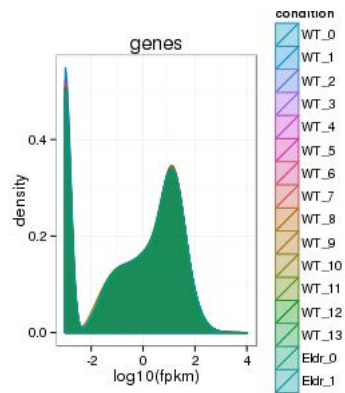

# Clustering

## Replicate Clusters

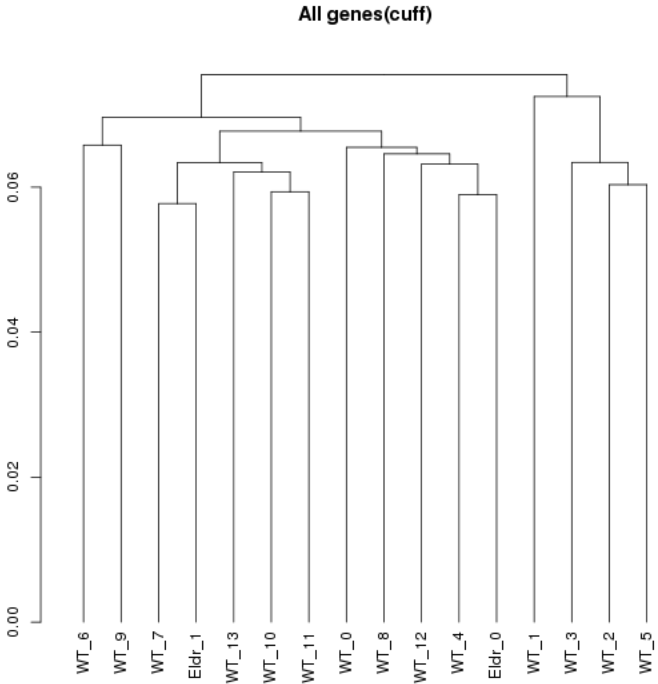

## NULL

## PCA (genes)

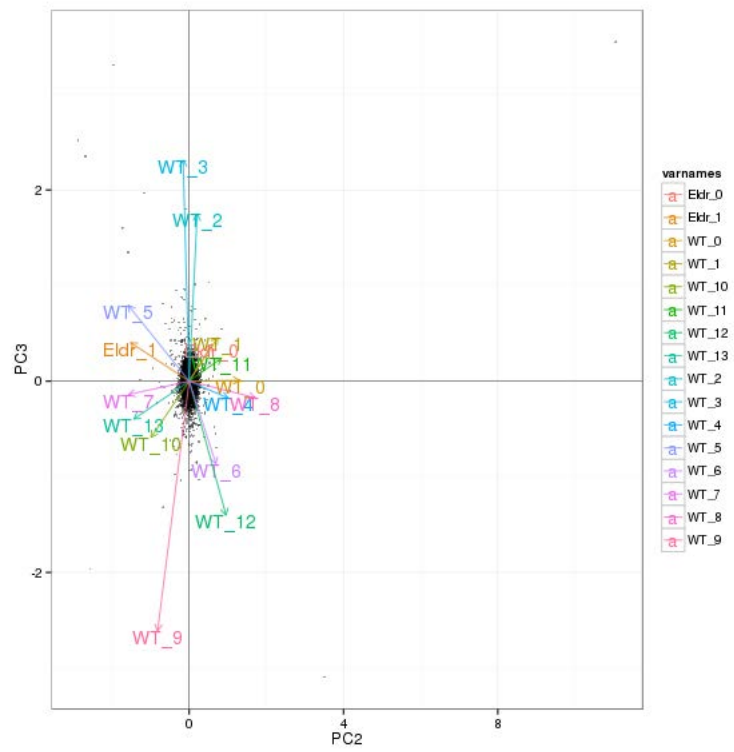

**MDS (genes)**

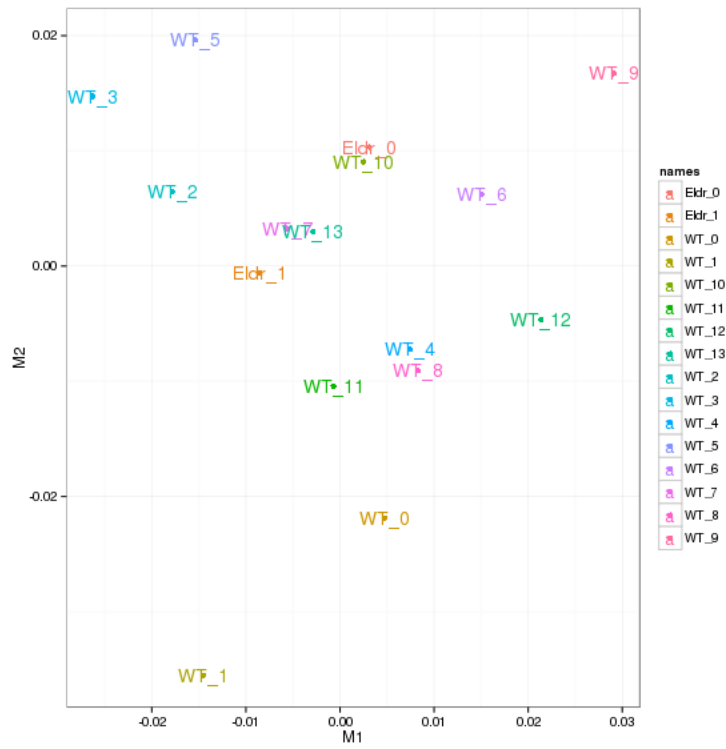

**KO assessment**  
**Endogenous lncRNA expression**

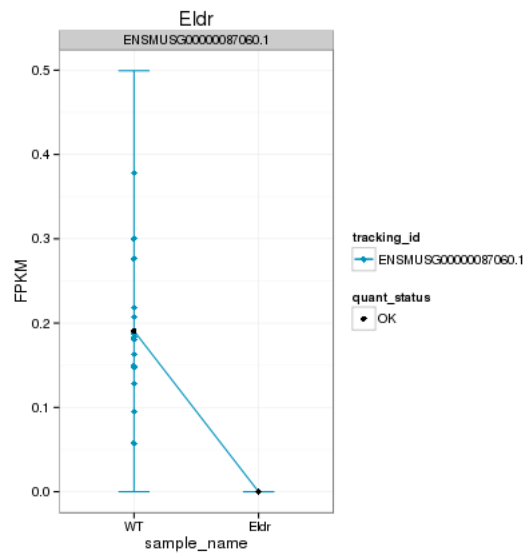

Endogenous expression of Eldr isoforms:

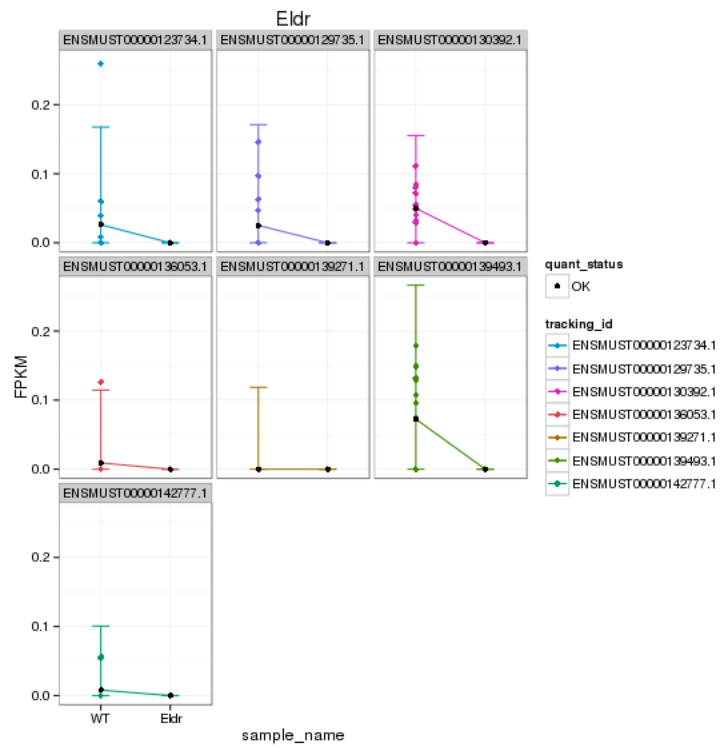

Barplot of gene expression:





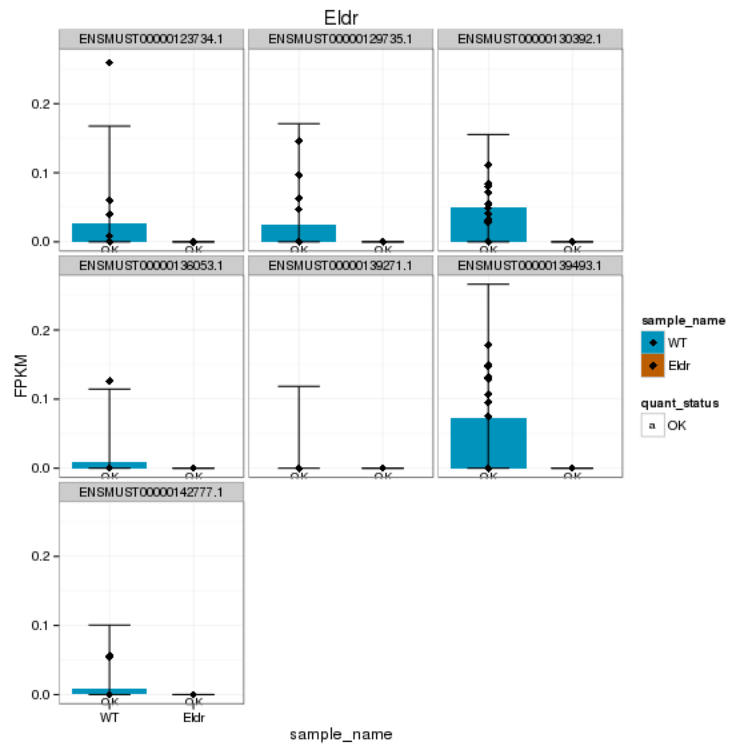

## LacZ expression

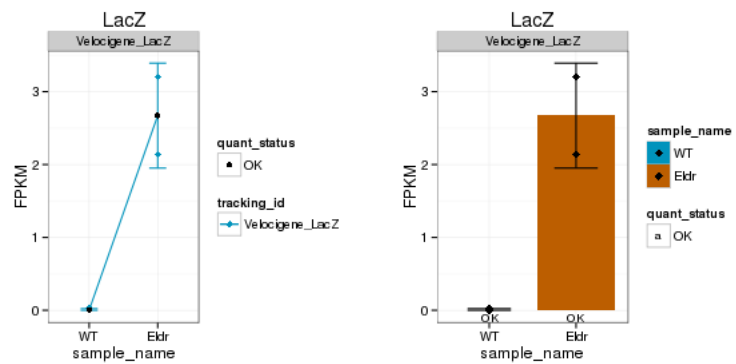

## Digital Genotyping (LacZ vs Endogenous lincRNA and Sex)

Eif2s3y is a y-expressed gene, Xist is an x-expressed gene Expression plot (endogenous linc, lacZ, Y-expressed gene):

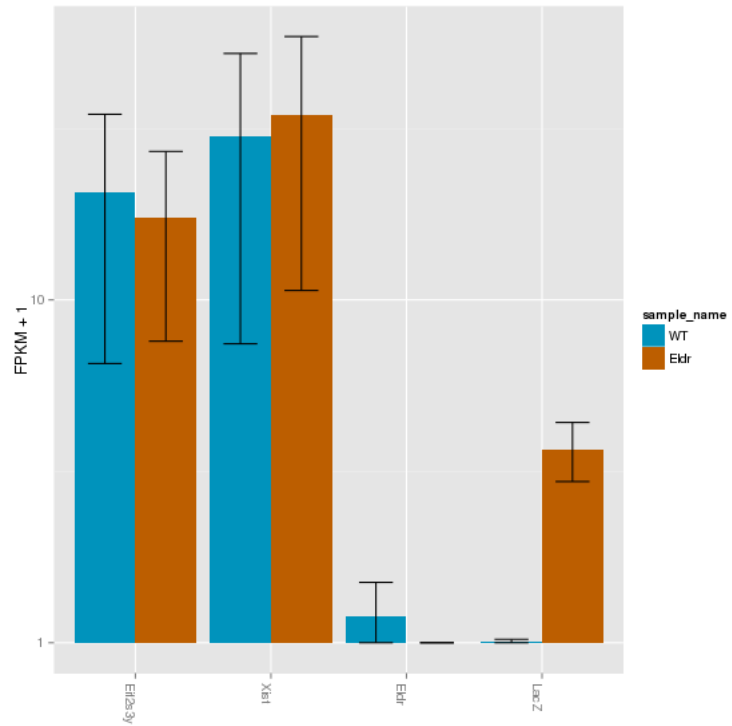

Expression heatmap:

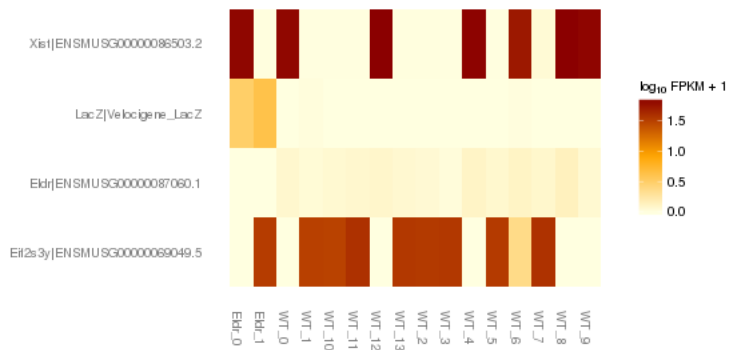

Track visualization

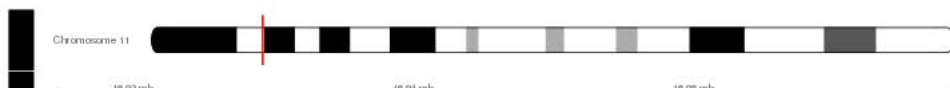

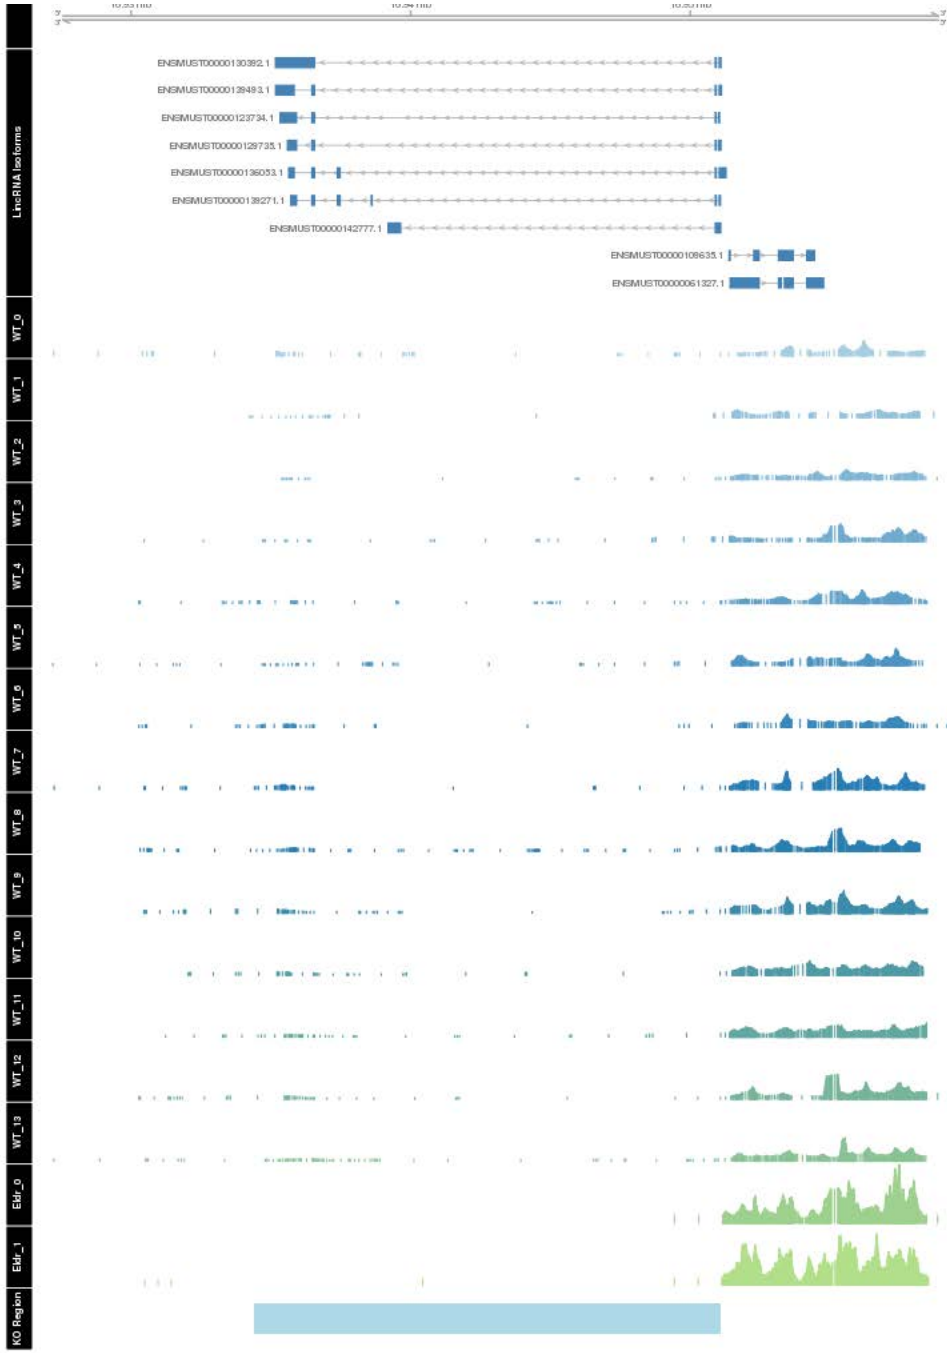

# Differential Analysis

## Differential Genes

There are 27 significantly differentially expressed genes. They are:

```
geneAnnot$gene_short_name
1 Nes
2 Ubc
3 Tpgs1
4 Adi1
5 Fos
6 Nr4a1
7 Rps14
8 Rps24
9 Nr4a3
10 Ndufs5
11 Arhgap27
12 Egr2
13 Egr1
14 Pcsk1n
15 Kihl42
16 C1qtnf4
17 Acp1
18 Fbxo48
19 Junb
20 Fat2
21 Capn11
22 Tpt1
23 Egr4
24 Gm9008
25 Wdfy1
26 Apold1
27 AA465934
```

### Matrix of gene significant differences between conditions

(skip for Brainmap wt-v-ko comparisons)

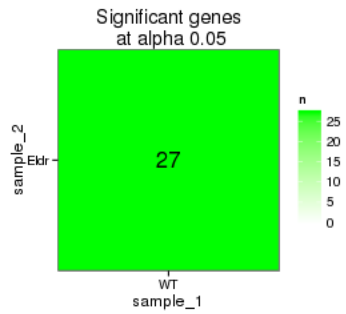

## Significant gene expression differences between conditions

Expression plot (genes):(turned off)

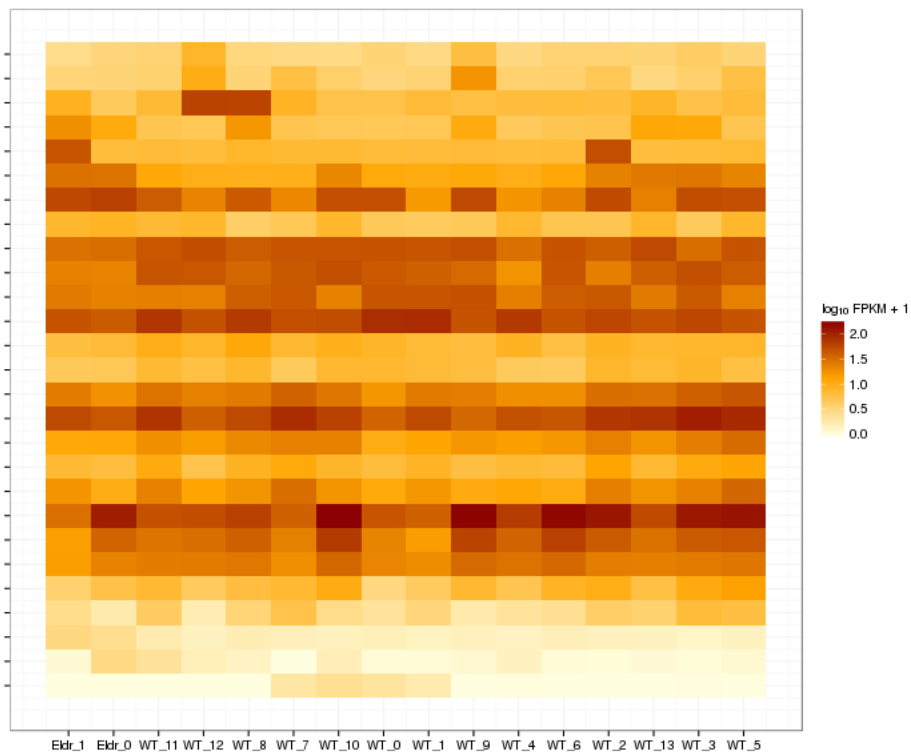

Significant genes with expression >50fpm (any condition):(turned off)

An individual look at each of the highly expressed significantly differentially regulated genes: (eval=false for first pass)

## Expression-level/significance relationship

Scatter plot of significant genes only:

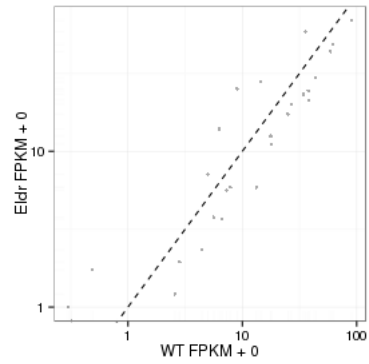

Volcano Plot

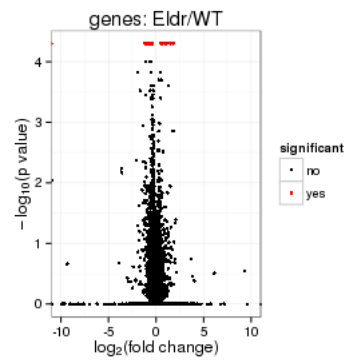

Volcano plot with significant genes only:

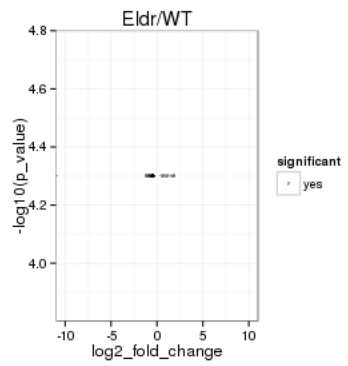

FoldChange Heatmap

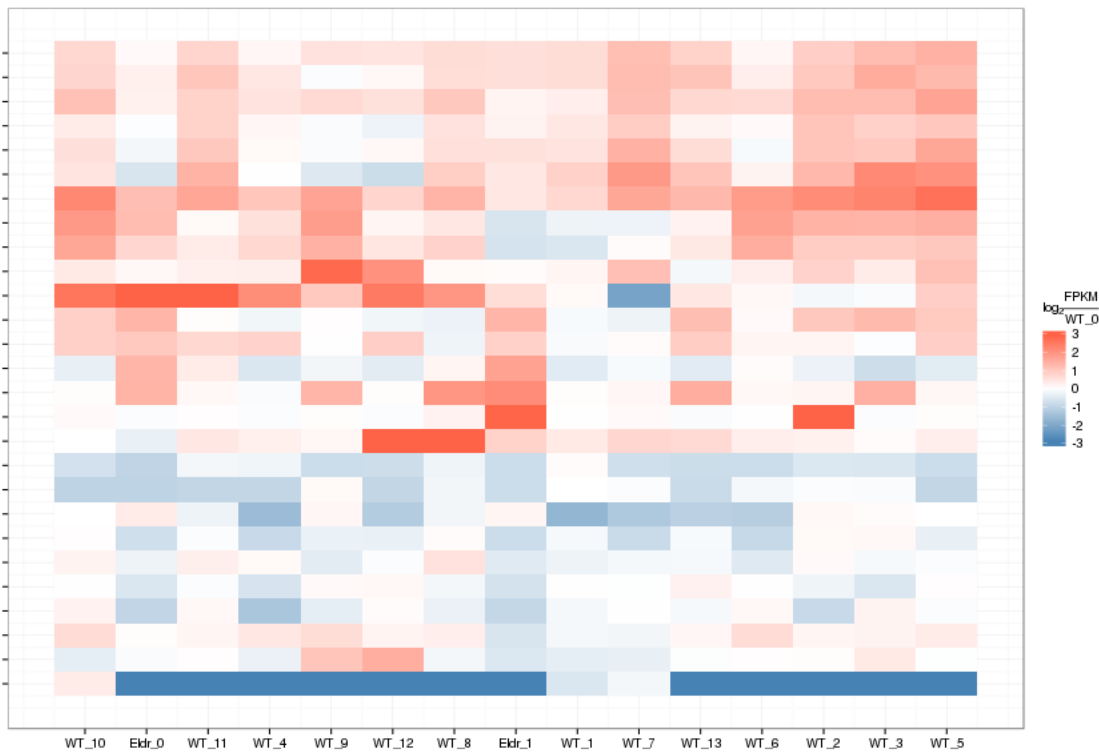

## Differential Splicing

Differential Isoforms between conditions

Per isoform difference between conditions:

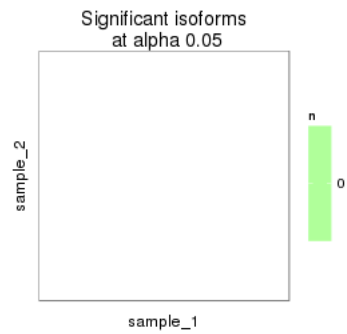

These isoforms are:

```
[1] "no sig isoforms"
```

Gene-level DE isoform heatmap

```
## [1] "no sig isoforms"
```

Isoform foldchange heatmap by isoform:

```
## [1] "no sig isoforms"
```

## Differential Splicing between conditions

(eval false for first pass)

Per condition differences in isoforms (Does gene have diff piechart between conditions?)

These genes are:

Splicing heatmap by isoform:

Splicing heatmap by gene

The following are significantly differentially spliced genes (relative portion of isoform per condition):

## Gene/Pathway Analysis

### GSEA

Enrichment and zscores are calculated based on expression in KO vs WT (fpkmKO/fpkmWT), so genes that are down regulated in KO are shown in blue, while upregulation is shown in red.

KO/WT Blue = down in KO Red = Up in KO

Biocarta enrichment:



```
## [1] "Not enough significant categories to print a heatmap!"
```

Biocarta zscore:

```
## [1] "Not enough significant categories to print a heatmap!"
```

Reactome enrichment:

```
## [1] "Not enough significant categories to print a heatmap!"
```

Reactome zscore:

```
## [1] "Not enough significant categories to print a heatmap!"
```

Kegg enrichment:

```
## [1] "Not enough significant categories to print a heatmap!"
```

Kegg zscore:

```
## [1] "Not enough significant categories to print a heatmap!"
```

Interneuron enrichment:

```
## Error: argument is of length zero
```

Interneuron zscore:

```
## Error: incorrect number of dimensions
```

```
## Error: object 'x_ordered' not found
```

```
## Error: error in evaluating the argument 'x' in selecting a method for function 'as.matrix': Error: object 'x_ordered' not found
```

```
## Error: object 'x_ordered' not found
```

Oncogene enrichment:

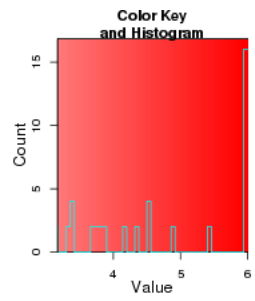

\_\_\_\_\_

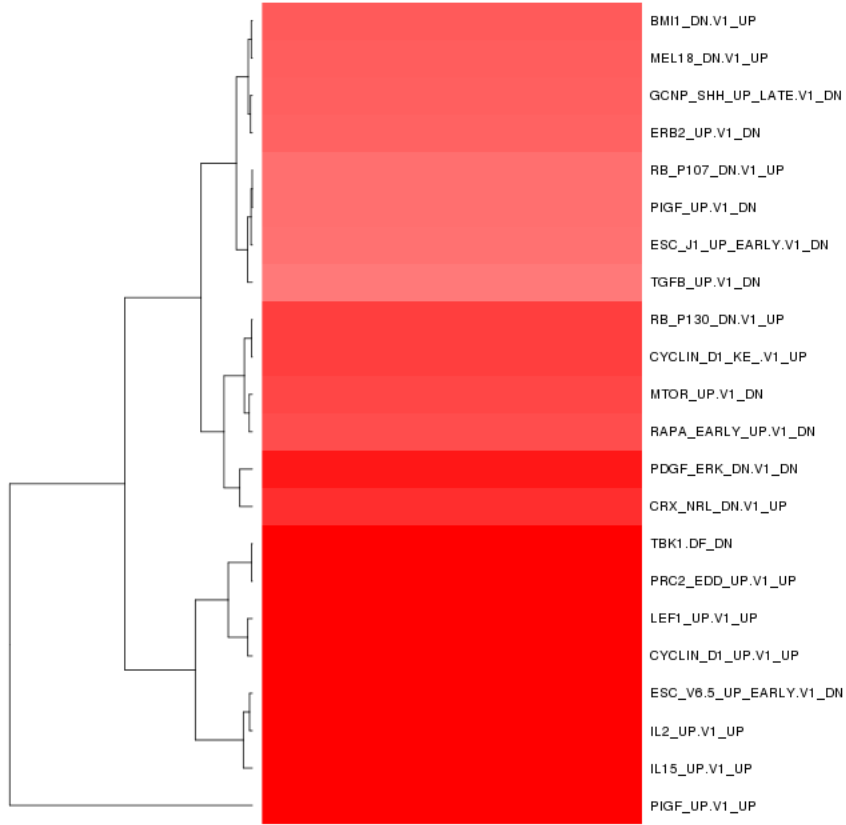

Oncogene zscore:

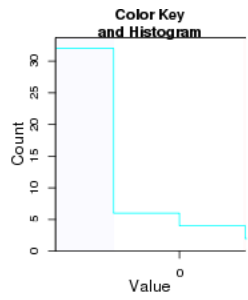

\_\_\_\_\_

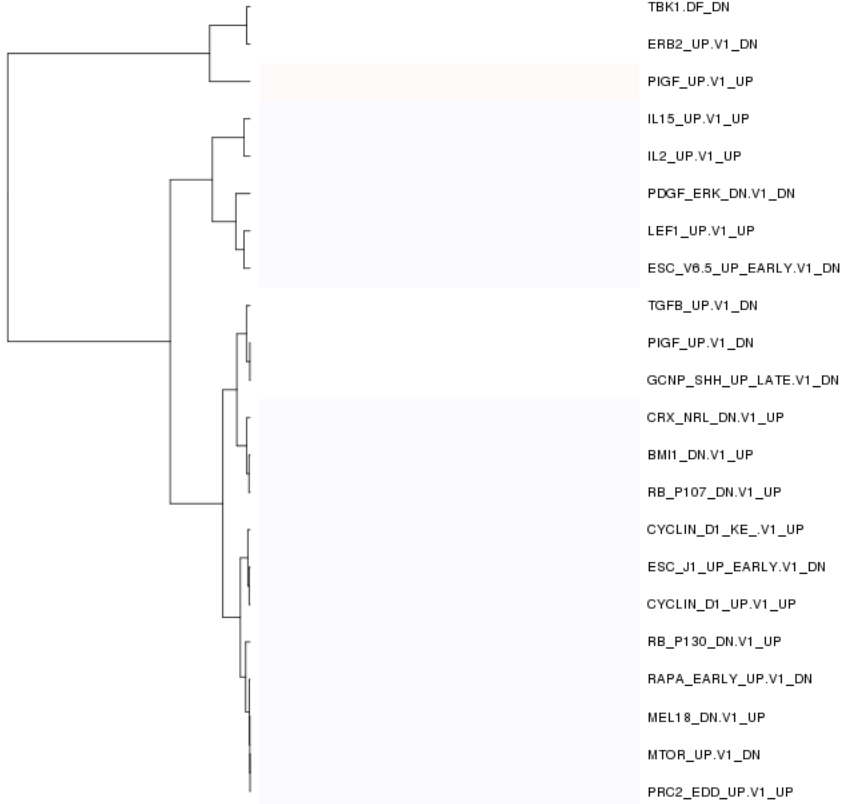

TBK1.DF\_DN  
 ERB2\_UP.V1\_DN  
 PIGF\_UP.V1\_UP  
 IL15\_UP.V1\_UP  
 IL2\_UP.V1\_UP  
 PDGF\_ERK\_DN.V1\_DN  
 LEF1\_UP.V1\_UP  
 ESC\_V6.5\_UP\_EARLY.V1\_DN  
 TGFB\_UP.V1\_DN  
 PIGF\_UP.V1\_DN  
 GCNP\_SHH\_UP\_LATE.V1\_DN  
 CRX\_NRL\_DN.V1\_UP  
 BMI1\_DN.V1\_UP  
 RB\_P107\_DN.V1\_UP  
 CYCLIN\_D1\_KE\_.V1\_UP  
 ESC\_J1\_UP\_EARLY.V1\_DN  
 CYCLIN\_D1\_UP.V1\_UP  
 RB\_P130\_DN.V1\_UP  
 RAPA\_EARLY\_UP.V1\_DN  
 MEL18\_DN.V1\_UP  
 MTOR\_UP.V1\_DN  
 PRC2\_EDD\_UP.V1\_UP

Immuno enrichment:

## Error: subscript out of bounds

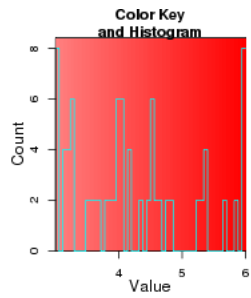

\_\_\_\_\_

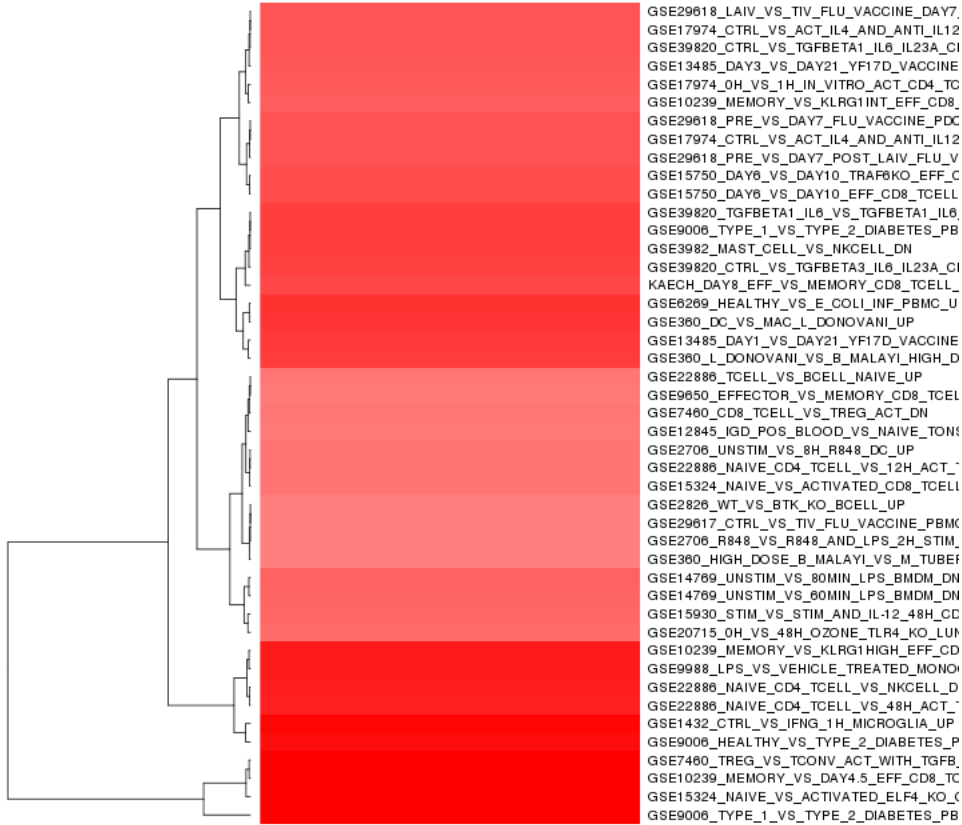

Immuno zscore:

## Error: subscript out of bounds

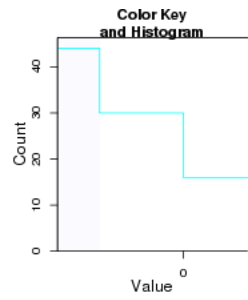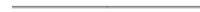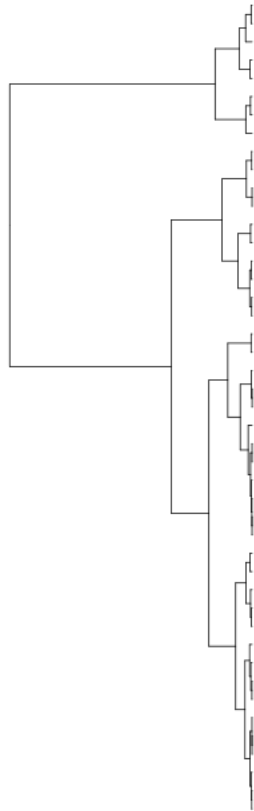

GSE39820\_CTRL\_VS\_TGFBETA1\_IL6\_IL23A\_CI  
 GSE29618\_PRE\_VS\_DAY7\_FLU\_VACCINE\_PDC  
 GSE7460\_CD8\_TCELL\_VS\_TREG\_ACT\_DN  
 GSE13485\_DAY1\_VS\_DAY21\_YF17D\_VACCINE  
 GSE9006\_TYPE\_1\_VS\_TYPE\_2\_DIABETES\_PB  
 GSE29617\_CTRL\_VS\_TIV\_FLU\_VACCINE\_PBM  
 GSE22886\_NAIVE\_CD4\_TCELL\_VS\_NKCELL\_D  
 GSE29618\_PRE\_VS\_DAY7\_POST\_LAIV\_FLU\_V  
 GSE17974\_CTRL\_VS\_ACT\_IL4\_AND\_ANTI\_IL12  
 GSE9050\_EFFECTOR\_VS\_MEMORY\_CD8\_TCEL  
 GSE17974\_CTRL\_VS\_ACT\_IL4\_AND\_ANTI\_IL12  
 GSE17974\_0H\_VS\_1H\_IN\_VITRO\_ACT\_CD4\_TC  
 GSE9006\_TYPE\_1\_VS\_TYPE\_2\_DIABETES\_PB  
 GSE14709\_UNSTIM\_VS\_80MIN\_LPS\_BMDM\_DN  
 GSE14709\_UNSTIM\_VS\_80MIN\_LPS\_BMDM\_DN  
 KAECH\_DAY8\_EFF\_VS\_MEMORY\_CD8\_TCELL\_  
 GSE15324\_NAIVE\_VS\_ACTIVATED\_ELF4\_KO\_C  
 GSE10239\_MEMORY\_VS\_DAY4.5\_EFF\_CD8\_TC  
 GSE300\_HIGH\_DOSE\_B\_MALAYI\_VS\_M\_TUBEI  
 GSE9988\_LPS\_VS\_VEHICLE\_TREATED\_MONO  
 GSE22886\_TCELL\_VS\_BCELL\_NAIVE\_UP  
 GSE300\_DC\_VS\_MAC\_L\_DONOVANI\_UP  
 GSE39820\_TGFBETA1\_IL6\_VS\_TGFBETA1\_IL6  
 GSE22886\_NAIVE\_CD4\_TCELL\_VS\_48H\_ACT\_  
 GSE15930\_STIM\_VS\_STIM\_AND\_IL12\_48H\_CD  
 GSE7460\_TREG\_VS\_TCONV\_ACT\_WITH\_TGFB  
 GSE13485\_DAY3\_VS\_DAY21\_YF17D\_VACCINE  
 GSE29618\_LAIV\_VS\_TIV\_FLU\_VACCINE\_DAY7  
 GSE2706\_R848\_VS\_R848\_AND\_LPS\_2H\_STIM  
 GSE3982\_MAST\_CELL\_VS\_NKCELL\_DN  
 GSE1432\_CTRL\_VS\_IFNG\_1H\_MICROGLIA\_UP  
 GSE9006\_HEALTHY\_VS\_TYPE\_2\_DIABETES\_P  
 GSE15750\_DAY6\_VS\_DAY10\_TRAF6KO\_EFF\_C  
 GSE20715\_0H\_VS\_48H\_OZONE\_TLR4\_KO\_LUN  
 GSE10239\_MEMORY\_VS\_KLRG1INT\_EFF\_CD8  
 GSE0209\_HEALTHY\_VS\_E\_COLI\_INF\_PBMC\_U  
 GSE12845\_IJD\_POS\_BLOOD\_VS\_NAIVE\_TON  
 GSE300\_L\_DONOVANI\_VS\_B\_MALAYI\_HIGH\_D  
 GSE10239\_MEMORY\_VS\_KLRG1HIGH\_EFF\_CD  
 GSE15324\_NAIVE\_VS\_ACTIVATED\_CD8\_TCELL  
 GSE2706\_UNSTIM\_VS\_8H\_R848\_DC\_UP  
 GSE2826\_WT\_VS\_BTK\_KO\_BCELL\_UP  
 GSE22886\_NAIVE\_CD4\_TCELL\_VS\_12H\_ACT\_  
 GSE15750\_DAY6\_VS\_DAY10\_EFF\_CD8\_TCELL  
 GSE39820\_CTRL\_VS\_TGFBETA3\_IL6\_IL23A\_CI

TF enrichment:

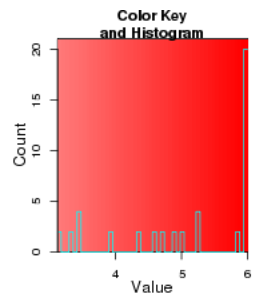

\_\_\_\_\_

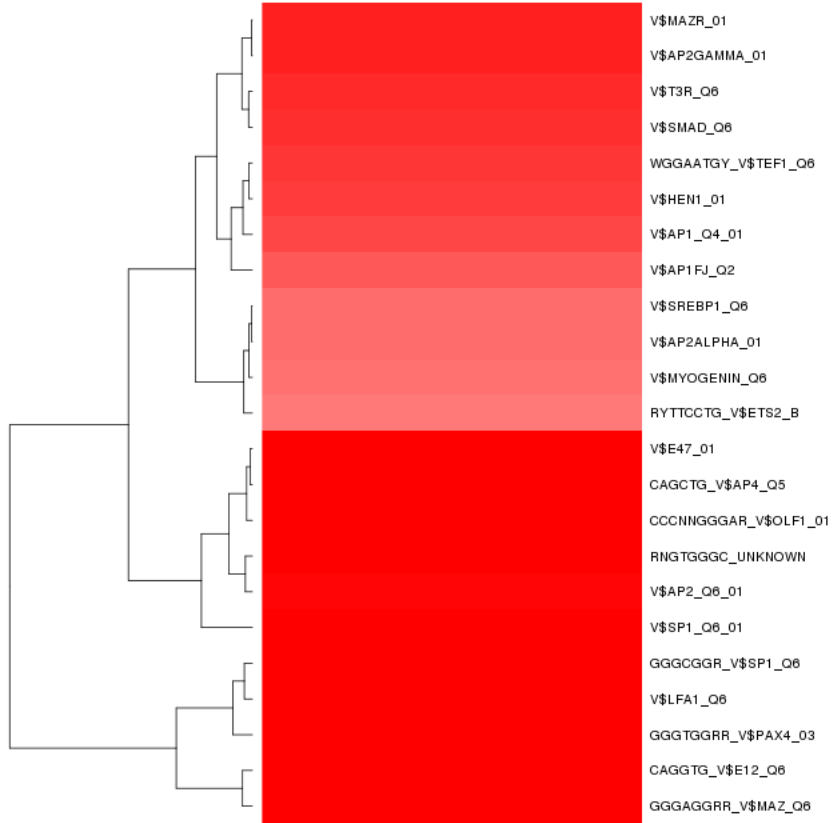

TF zscore:

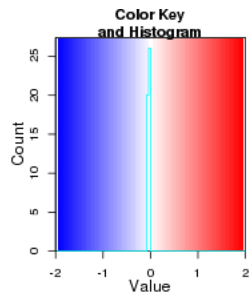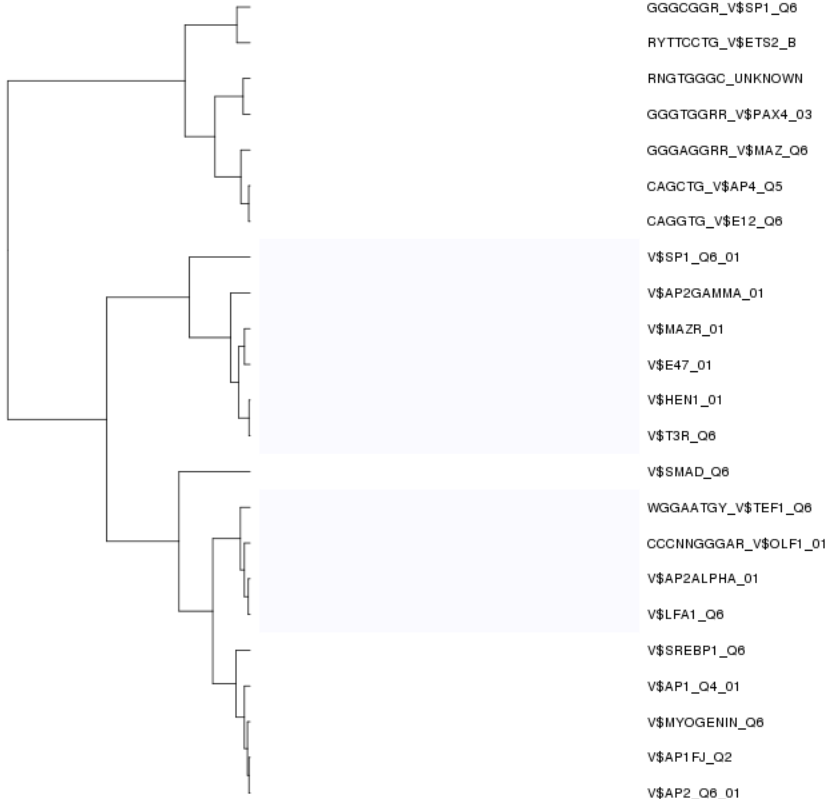

## GO enrichment

Cluster profiler used to call enrichments of significantly differentially regulated genes that map to Entrez IDs.

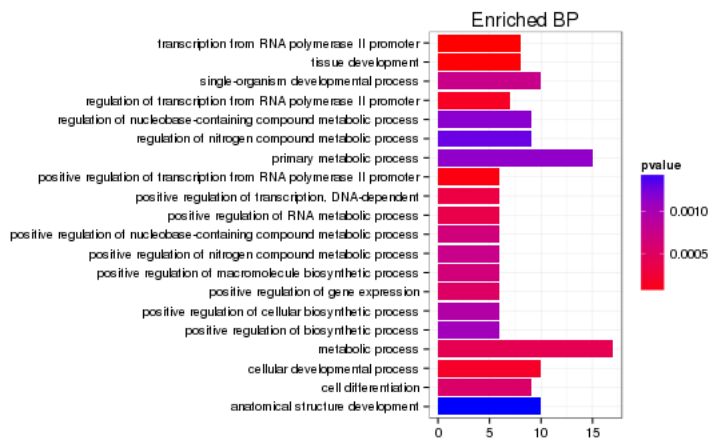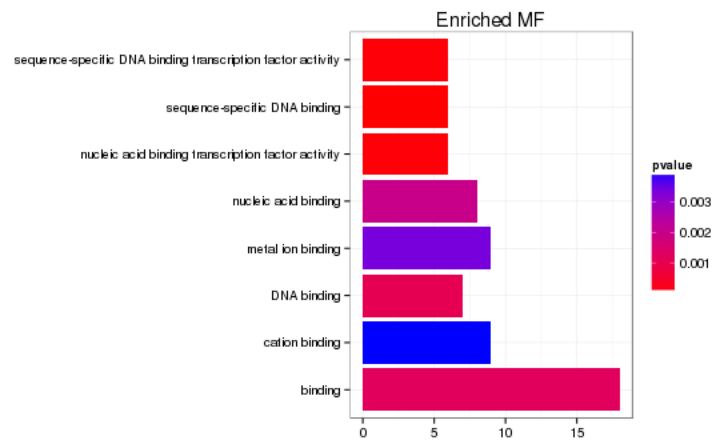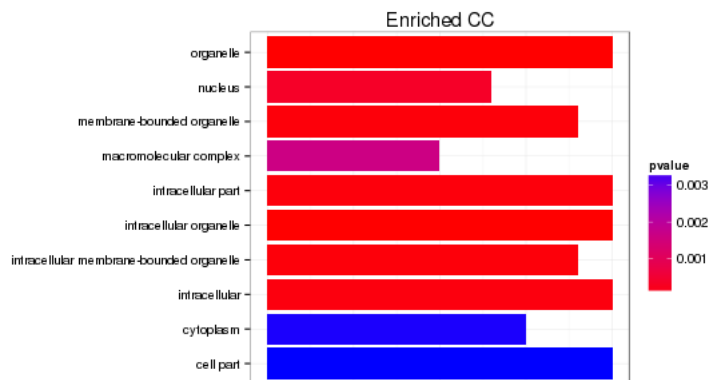



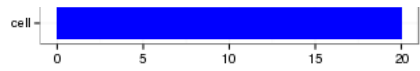

```
## Error: need finite 'xlim' values
```

```
## Error: need finite 'xlim' values
```

**Enrichment or depletion for stage-specific cell cycle markers**



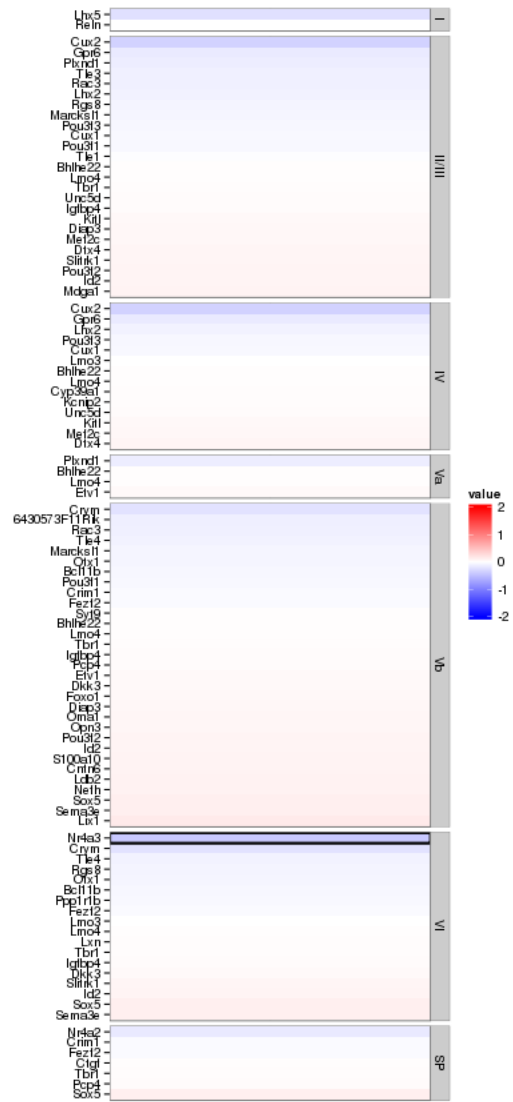

Enrichment or depletion for specific neural cell types

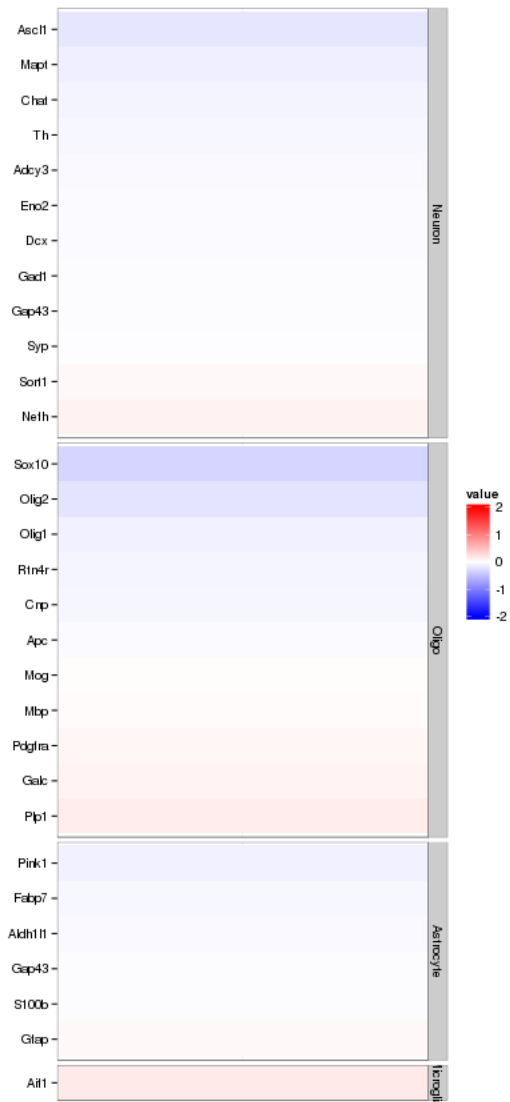

**Enrichment or Depletion of neural differentiation markers**

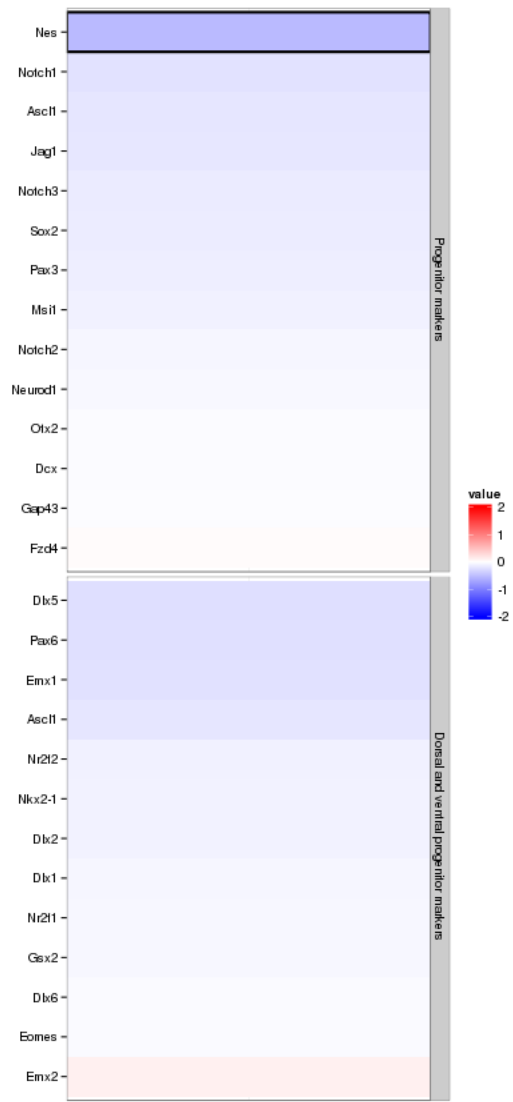

## Cis vs Trans (locally)

$\log_2$  Foldchange and test statistic are calculated with the ratio of  $\text{fpkm(KO)}/\text{fpkm(WT)}$ , thus the  $\text{test\_stat}$  is positive if a gene is higher in the KO and negative if a gene has lower expression in the KO

The pvalue for 1 genes significantly regulated in a region this size is: 0.0788

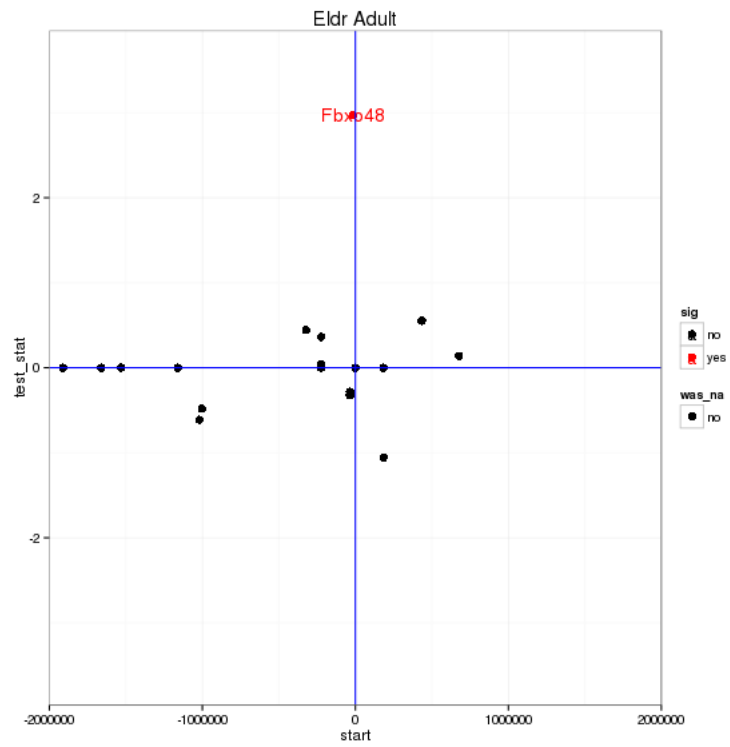

## Notes

Samples used are:

10

- 1 JR729
- 2 JR728
- 3 JR796
- 4 JR797
- 5 JR740
- 6 JR800
- 7 JR827
- 8 JR778
- 9 JR734
- 10 JR802
- 11 JR803
- 12 JR735
- 13 JR785
- 14 JR781

15 JR799

16 JR777

## Replicates

| file                                                                          | sample_name | replicate | rep_name | total_mass  | norm_mass   | internal_scale | external_scale |
|-------------------------------------------------------------------------------|-------------|-----------|----------|-------------|-------------|----------------|----------------|
| 1 /n/rinn_data1/seq/Igoff/Projects/BrainMap/data/quants/JR729/abundances.cxb  | WT          | 0         | WT_0     | 26334400.00 | 34779900.00 | 0.76           | 1.00           |
| 2 /n/rinn_data1/seq/Igoff/Projects/BrainMap/data/quants/JR728/abundances.cxb  | WT          | 1         | WT_1     | 20329200.00 | 34779900.00 | 0.58           | 1.00           |
| 3 /n/rinn_data1/seq/Igoff/Projects/BrainMap/data/quants/JR796/abundances.cxb  | WT          | 2         | WT_2     | 34089000.00 | 34779900.00 | 0.98           | 1.00           |
| 4 /n/rinn_data1/seq/Igoff/Projects/BrainMap/data/quants/JR797/abundances.cxb  | WT          | 3         | WT_3     | 28103300.00 | 34779900.00 | 0.80           | 1.00           |
| 5 /n/rinn_data1/seq/Igoff/Projects/BrainMap/data/quants/JR740/abundances.cxb  | WT          | 4         | WT_4     | 35808200.00 | 34779900.00 | 1.03           | 1.00           |
| 6 /n/rinn_data1/seq/Igoff/Projects/BrainMap/data/quants/JR800/abundances.cxb  | WT          | 5         | WT_5     | 37012200.00 | 34779900.00 | 1.07           | 1.00           |
| 7 /n/rinn_data1/seq/Igoff/Projects/BrainMap/data/quants/JR827/abundances.cxb  | WT          | 6         | WT_6     | 27786600.00 | 34779900.00 | 0.80           | 1.00           |
| 8 /n/rinn_data1/seq/Igoff/Projects/BrainMap/data/quants/JR778/abundances.cxb  | WT          | 7         | WT_7     | 39541900.00 | 34779900.00 | 1.15           | 1.00           |
| 9 /n/rinn_data1/seq/Igoff/Projects/BrainMap/data/quants/JR734/abundances.cxb  | WT          | 8         | WT_8     | 34480600.00 | 34779900.00 | 1.01           | 1.00           |
| 10 /n/rinn_data1/seq/Igoff/Projects/BrainMap/data/quants/JR802/abundances.cxb | WT          | 9         | WT_9     | 45467400.00 | 34779900.00 | 1.30           | 1.00           |
| 11 /n/rinn_data1/seq/Igoff/Projects/BrainMap/data/quants/JR803/abundances.cxb | WT          | 10        | WT_10    | 52130400.00 | 34779900.00 | 1.50           | 1.00           |
| 12 /n/rinn_data1/seq/Igoff/Projects/BrainMap/data/quants/JR735/abundances.cxb | WT          | 11        | WT_11    | 34994400.00 | 34779900.00 | 1.01           | 1.00           |
| 13 /n/rinn_data1/seq/Igoff/Projects/BrainMap/data/quants/JR785/abundances.cxb | WT          | 12        | WT_12    | 34173600.00 | 34779900.00 | 0.97           | 1.00           |
| 14 /n/rinn_data1/seq/Igoff/Projects/BrainMap/data/quants/JR781/abundances.cxb | WT          | 13        | WT_13    | 41538900.00 | 34779900.00 | 1.20           | 1.00           |
| 15 /n/rinn_data1/seq/Igoff/Projects/BrainMap/data/quants/JR799/abundances.cxb | Eldr        | 0         | Eldr_0   | 36453400.00 | 34779900.00 | 1.03           | 1.00           |
| 16 /n/rinn_data1/seq/Igoff/Projects/BrainMap/data/quants/JR777/abundances.cxb | Eldr        | 1         | Eldr_1   | 42739700.00 | 34779900.00 | 1.23           | 1.00           |

## Session Info

```
## R version 3.0.2 (2013-09-25)
## Platform: x86_64-unknown-linux-gnu (64-bit)
##
## locale:
## [1] LC_CTYPE=en_US.UTF-8      LC_NUMERIC=C
## [3] LC_TIME=en_US.UTF-8      LC_COLLATE=en_US.UTF-8
## [5] LC_MONETARY=en_US.UTF-8  LC_MESSAGES=en_US.UTF-8
## [7] LC_PAPER=en_US.UTF-8     LC_NAME=C
## [9] LC_ADDRESS=C             LC_TELEPHONE=C
## [11] LC_MEASUREMENT=en_US.UTF-8 LC_IDENTIFICATION=C
##
## attached base packages:
## [1] grid      parallel  methods  stats    graphics grDevices utils
## [8] datasets base
##
## other attached packages:
## [1] plyr_1.8.1
## [2] stringr_0.6.2
## [3] seqbias_1.10.0
## [4] BSgenome.Mmusculus.UCSC.mm10_1.3.19
## [5] BSgenome_1.30.0
## [6] Biostrings_2.30.1
```

```

## [7] gdata_2.13.3
## [8] GO.db_2.10.1
## [9] org.Mm.eg.db_2.10.1
## [10] clusterProfiler_1.13.1
## [11] DOSE_2.0.0
## [12] ReactomePA_1.6.1
## [13] AnnotationDbi_1.24.0
## [14] Biobase_2.22.0
## [15] mgcv_1.7-29
## [16] nlme_3.1-117
## [17] RMySQL_0.9-3
## [18] RColorBrewer_1.0-5
## [19] gridExtra_0.9.1
## [20] gtable_0.1.2
## [21] marray_1.40.0
## [22] gplots_2.13.0
## [23] GSA_1.03
## [24] limma_3.18.13
## [25] xtable_1.7-3
## [26] cummeRbund_2.7.2
## [27] Gviz_1.6.0
## [28] rtracklayer_1.22.7
## [29] GenomicRanges_1.14.4
## [30] XVector_0.2.0
## [31] IRanges_1.20.7
## [32] fastcluster_1.1.13
## [33] reshape2_1.4
## [34] ggplot2_1.0.0
## [35] RSQLite_0.11.4
## [36] DBI_0.2-7
## [37] BiocGenerics_0.8.0
## [38] knitr_1.6
##
## loaded via a namespace (and not attached):
## [1] biomaRt_2.18.0      biovizBase_1.10.8  bitops_1.0-6
## [4] caTools_1.17        cluster_1.15.2     colorspace_1.2-4
## [7] dichromat_2.0-0     digest_0.6.4       DO.db_2.7
## [10] evaluate_0.5.5      formatR_0.10       Formula_1.1-1
## [13] GenomicFeatures_1.14.5 GOsemSim_1.20.3    graph_1.40.1
## [16] graphite_1.8.1      gtools_3.4.1       Hmisc_3.14-4
## [19] igraph_0.7.1        KEGG.db_2.10.1     KernSmooth_2.23-12
## [22] labeling_0.2        lattice_0.20-29    latticeExtra_0.6-26
## [25] MASS_7.3-33        Matrix_1.1-3       munSELL_0.4.2
## [28] org.Hs.eg.db_2.10.1 proto_0.3-10       qvalue_1.36.0
## [31] Rcpp_0.11.2         RCurl_1.95-4.1     reactome.db_1.46.1
## [34] Rsamtools_1.14.3   scales_0.2.4       splines_3.0.2
## [37] stats4_3.0.2       survival_2.37-7    tcltk_3.0.2
## [40] tools_3.0.2        XML_3.98-1.1       zlibbioc_1.8.0

```

## Run Info



```
##          param
## 1      cmd_line
## 2          version
## 3  SVN_revision
## 4  boost_version
## 5          genome
##
## 1 cuffdiff -p 10 -L WT,Eldr -o /n/rinn_data1/seq/lgofff/Projects/BrainMap/data/diffs/Eldr_vs_WT_Adult /n/rinn_data1/seq/lgofff/Projects/BrainMap/data/annc
## 2
## 3
## 4
## 5
```

# Eldr KO vs WT (Embryonic)

This file shows the wt-v-ko comparison for Eldr.

Cuff overview:

```
## CuffSet instance with:  
## 2 samples  
## 26754 genes  
## 77524 isoforms  
## 0 TSS  
## 23066 CDS  
## 0 promoters  
## 0 splicing  
## 19954 relCDS
```

## QC

### Dispersion

Dispersion plot for genes in cuff: (Overdispersion can lead to innacurate quants)

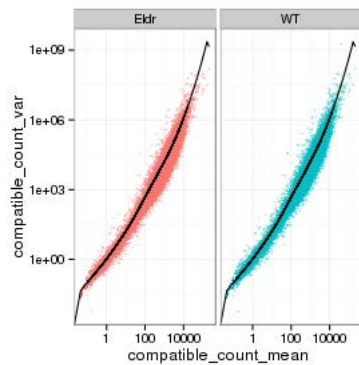

### Cross-replicate variability (fpkmSCVplot)

Differences in CV 2 can result in lower numbers of differentially expressed genes due to a higher degree of variability between replicate fpkm estimates.

Genes:

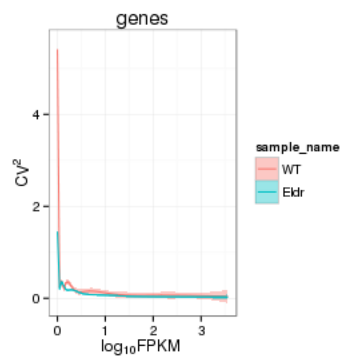

Isoforms:

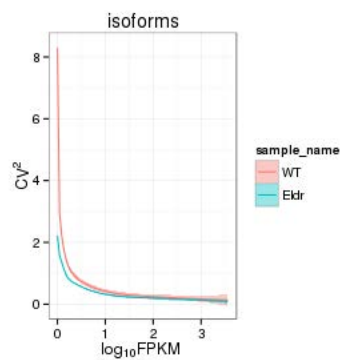

## MvA plot

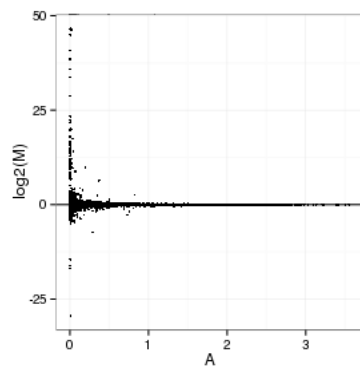

MvA plot counts

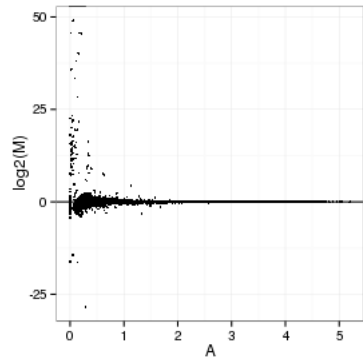

## Scatterplot matrix

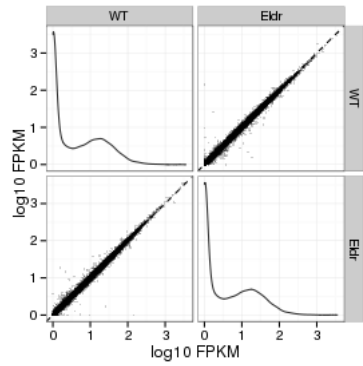

## Distributions

### Boxplots

Boxplot (genes)

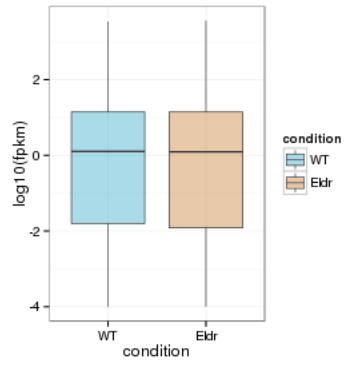

Boxplot (genes, replicates)

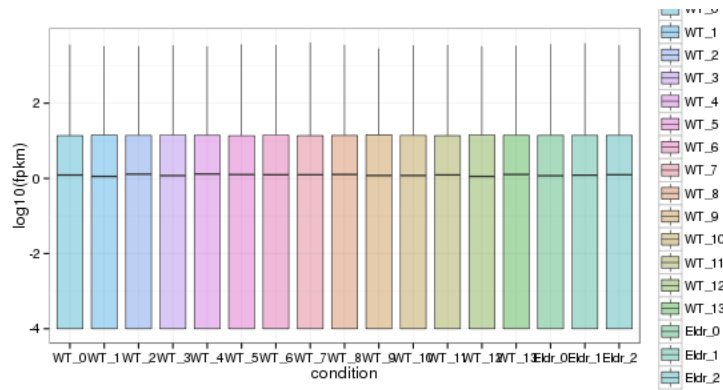

Boxplot (isoforms)

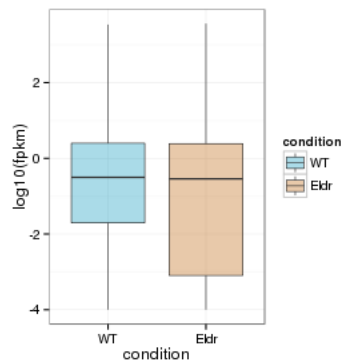

Boxplot (isoforms, replicates)

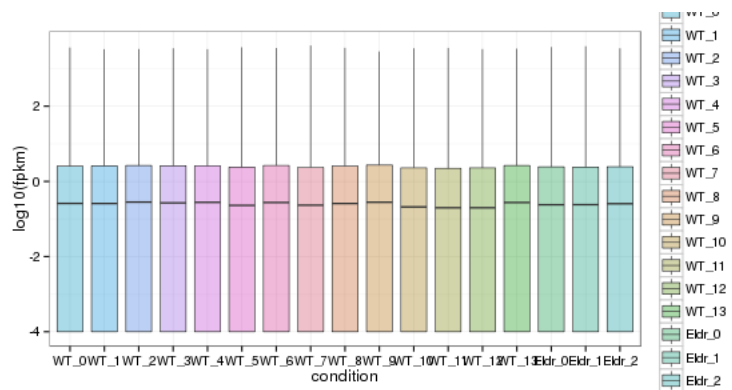

## Density

Density (genes)

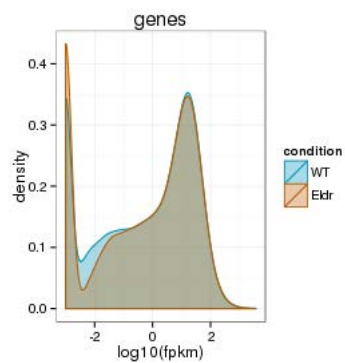

Density (genes, replicates)

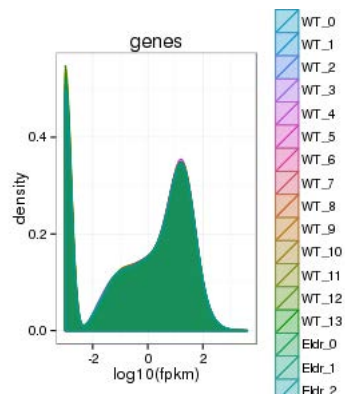

# Clustering

## Replicate Clusters

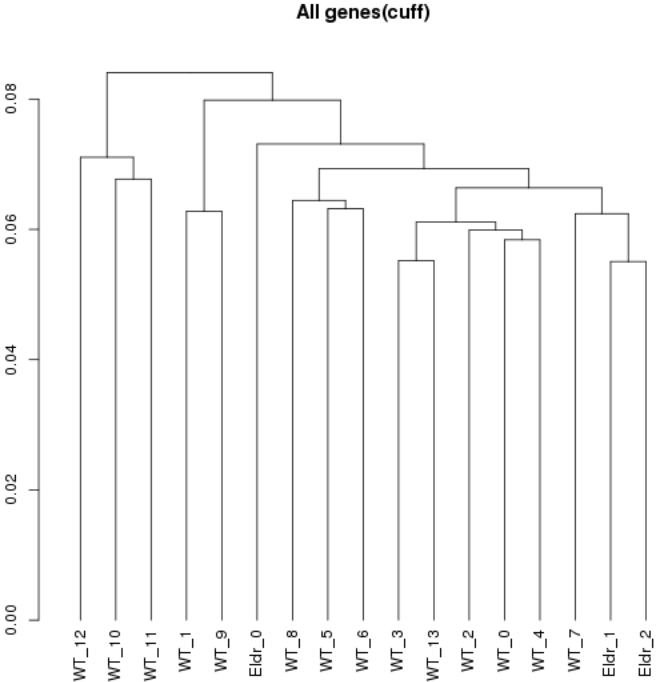

## NULL

## PCA (genes)

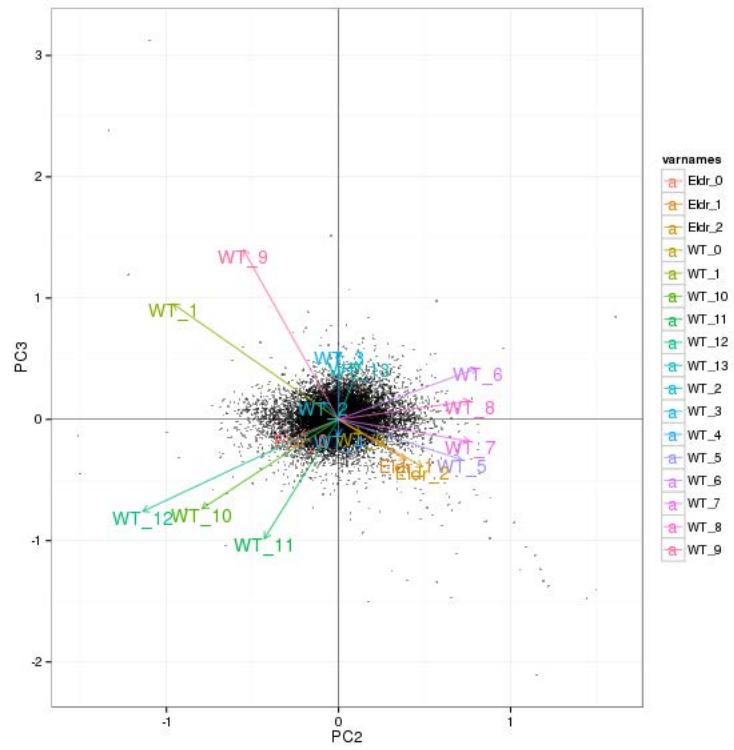

**MDS (genes)**



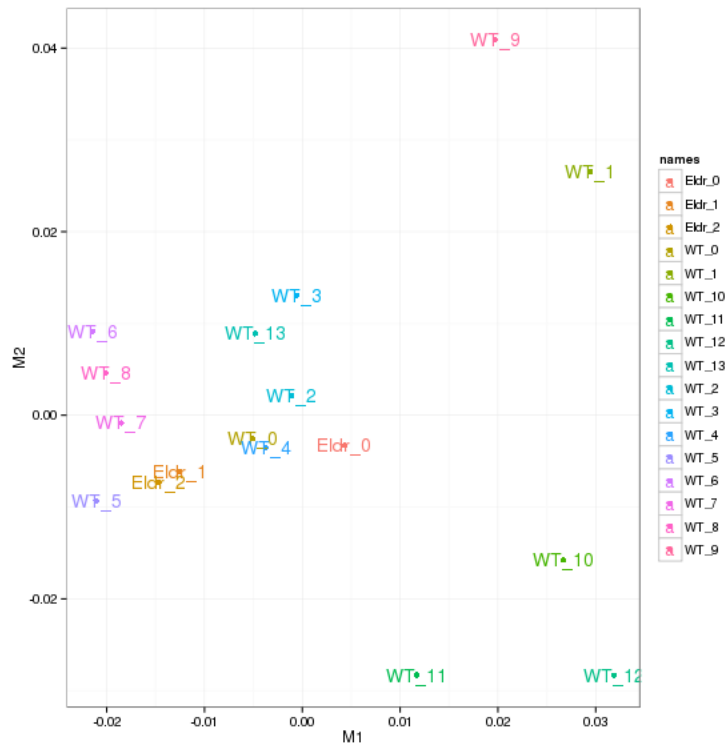

## KO assessment

Endogenous IncRNA expression

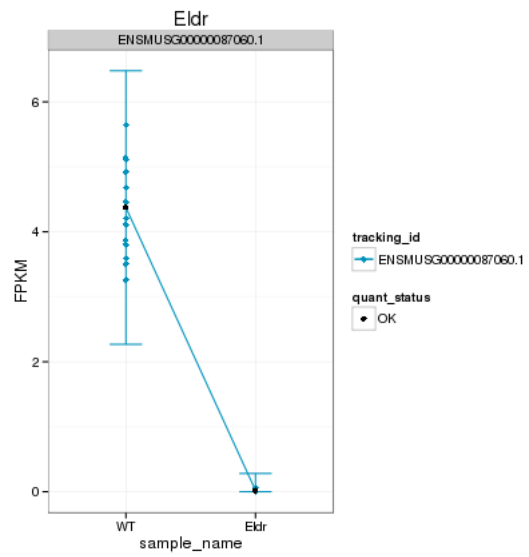

Endogenous expression of Eldr isoforms:

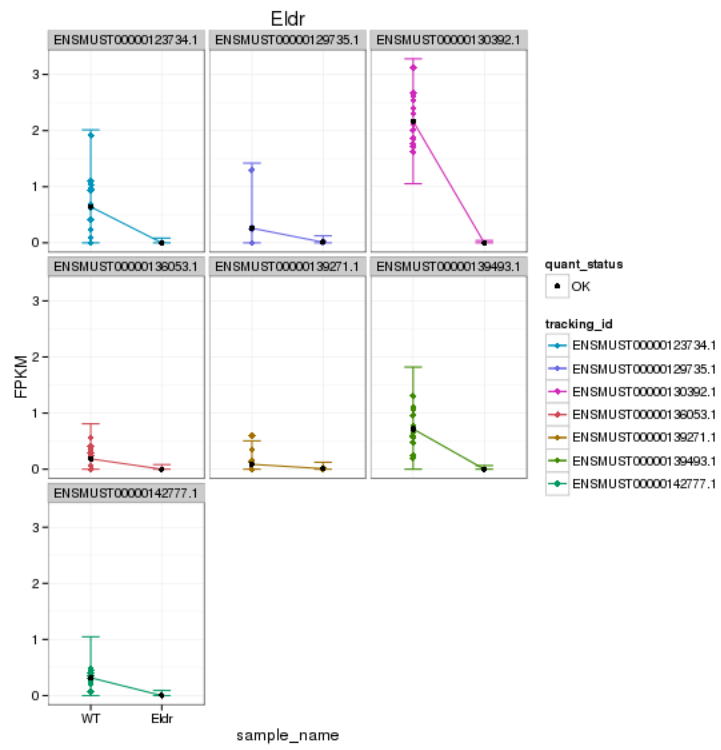

Barplot of gene expression:

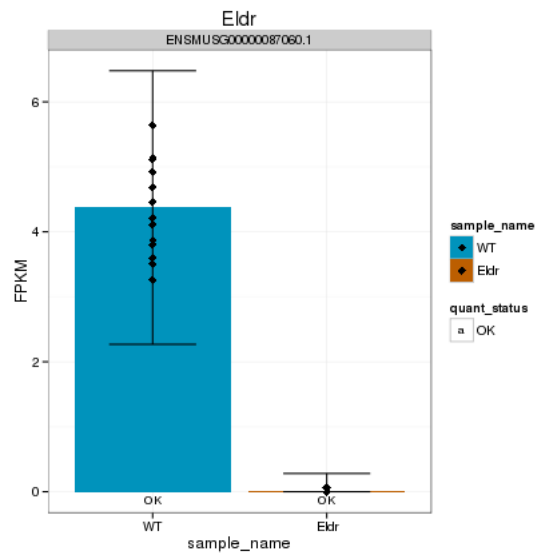

Barplot of isoform expression:

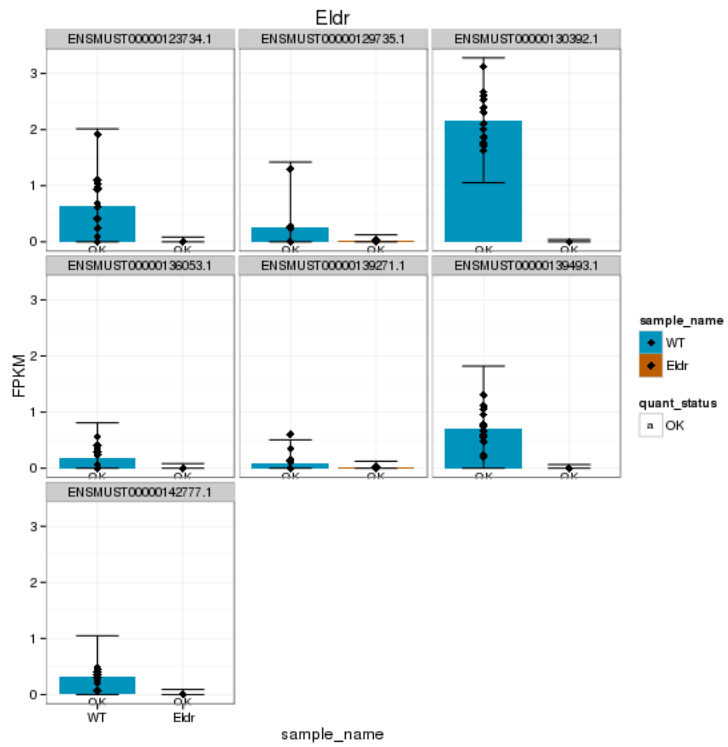

## LacZ expression

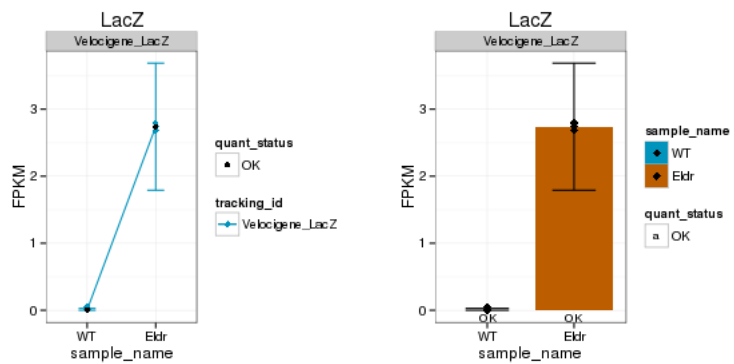

## Digital Genotyping (LacZ vs Endogenous lincRNA and Sex)

Eif2s3y is a y-expressed gene, Xist is an x-expressed gene Expression plot (endogenous linc, lacZ, Y-expressed gene):

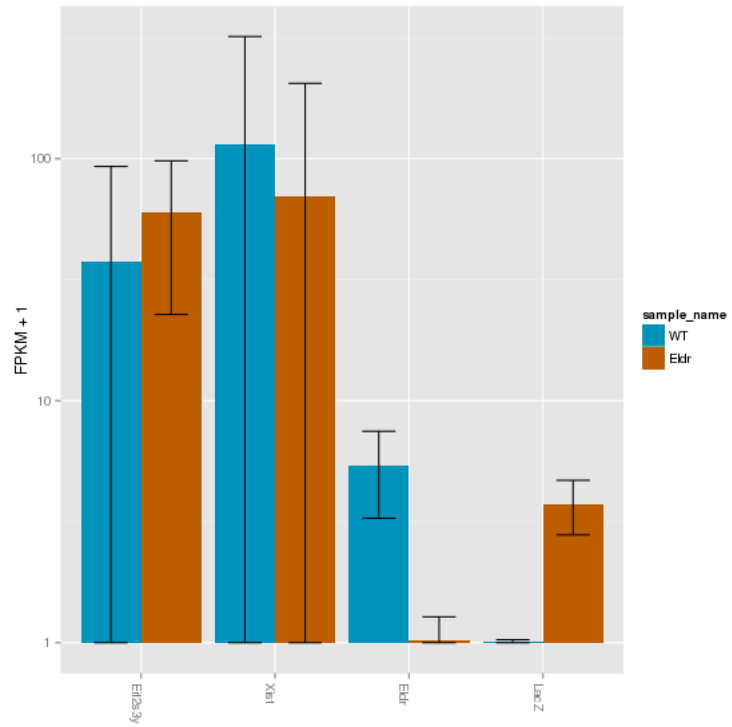

Expression heatmap:

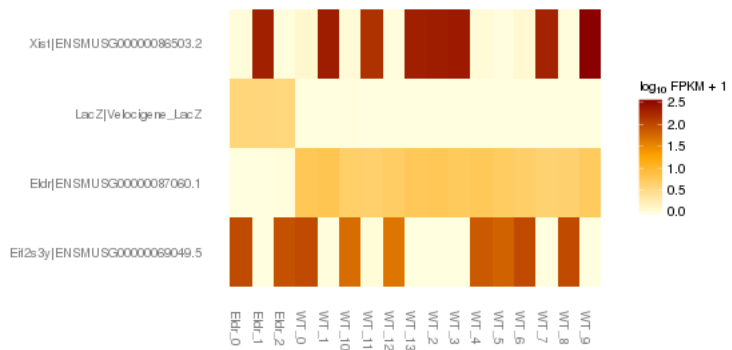

Track visualization

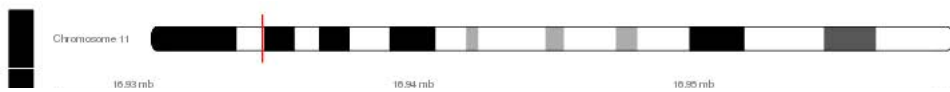

NO Region LncRNA isoforms WT\_0 WT\_1 WT\_2 WT\_3 WT\_4 WT\_5 WT\_6 WT\_7 WT\_8 WT\_9 WT\_10 WT\_11 WT\_12 WT\_13 EB1\_0 EB1\_1 EB1\_2

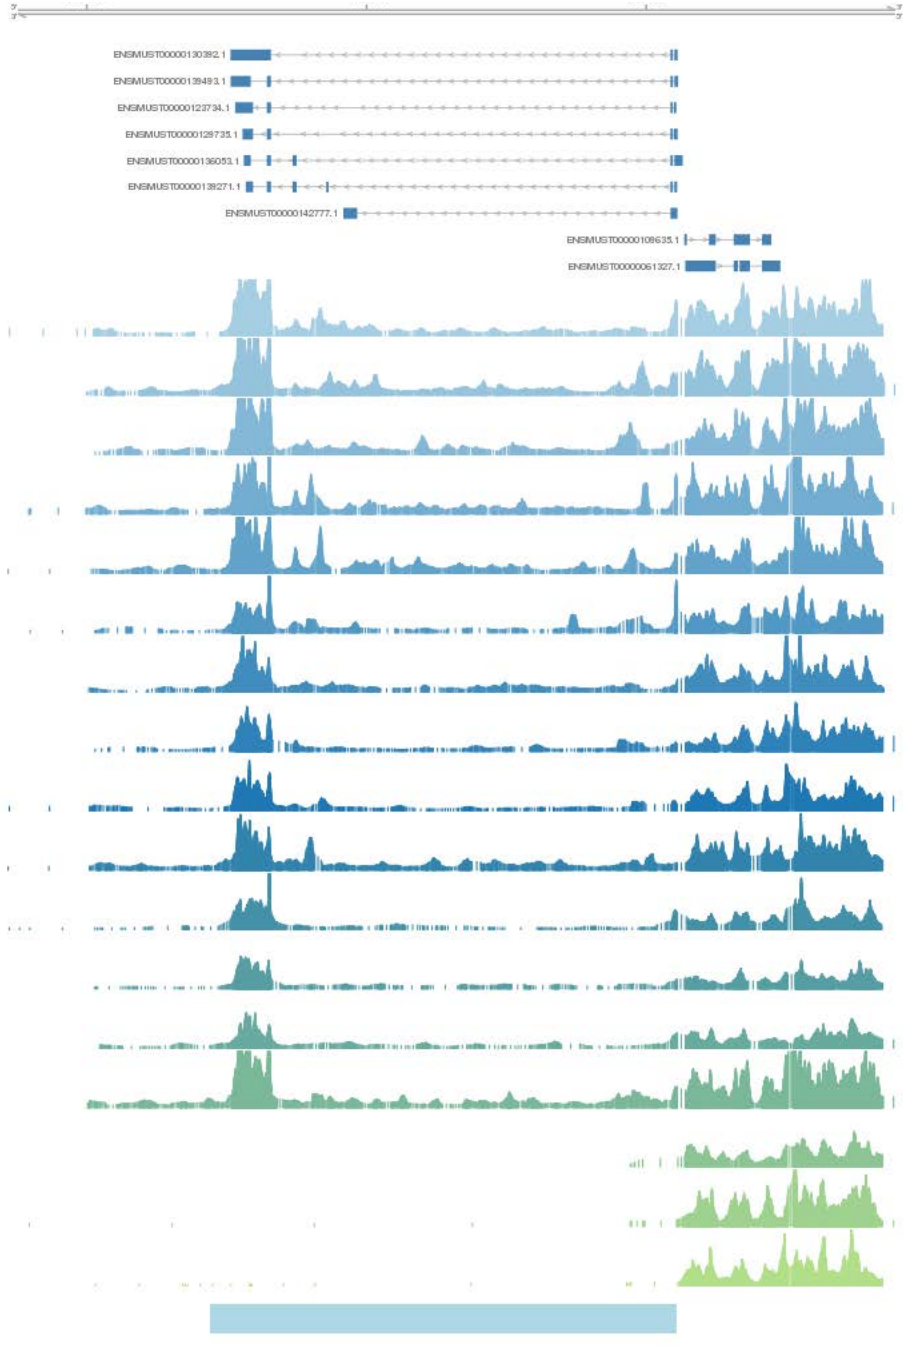

# Differential Analysis

## Differential Genes

There are 151 significantly differentially expressed genes. They are:

|    | geneAnnot\$gene_short_name |
|----|----------------------------|
| 1  | Cdh1                       |
| 2  | Col1a1                     |
| 3  | Cacna1e                    |
| 4  | Utp20                      |
| 5  | Polr2a                     |
| 6  | Nid1                       |
| 7  | Vax1                       |
| 8  | Rplp1                      |
| 9  | Ttc9b                      |
| 10 | Ptgds                      |
| 11 | Abca1                      |
| 12 | Dync1h1                    |
| 13 | D10Bwg1379e                |
| 14 | Lama2                      |
| 15 | Snrpf                      |
| 16 | Egfr                       |
| 17 | Pold2                      |
| 18 | Aebp1                      |
| 19 | Prpf8                      |
| 20 | Hoxb9                      |
| 21 | Pdhb                       |
| 22 | Nid2                       |
| 23 | Sla                        |
| 24 | Myh9                       |
| 25 | Col2a1                     |
| 26 | Dlx2                       |
| 27 | Igf2r                      |
| 28 | Prss41                     |
| 29 | Fbn2                       |
| 30 | Rps14                      |
| 31 | Lbx1                       |
| 32 | Rps26                      |
| 33 | Pgm2                       |
| 34 | Fn1                        |
| 35 | Lamc1                      |
| 36 | Ddr2                       |
| 37 | Lrp2                       |



38 Fbn1  
39 Notch2  
40 Col11a1  
41 Tnc  
42 Svep1  
43 Snapc3  
  
44 Scp2  
45 Kcnq4  
46 Ndufs5  
47 Wdr65  
48 Nkx1-1  
49 Pdgfra  
50 Uncx  
51 Lhx5  
52 Col1a2  
53 Slc13a4  
54 Aldh1l1  
55 Itpr1  
56 Dera  
57 Herc2  
58 Hddc3  
59 Iqgap1  
60 Eif3f  
61 Lama1  
62 3830406C13Rik  
63 Adamts15  
64 Gbx2  
65 Prr7  
66 Fras1  
67 Vps13c  
68 Figl1  
69 Cox8a  
70 Frem2  
  
71 Rps16  
72 Vstm2l  
73 Notch3  
74 Ifit172  
75 Hoxb4  
76 Atp5l  
77 Srrm2  
78 Pcsk1n  
79 Klhl42  
80 Tlx3

81 C1qtnf4  
82 Dnah7b  
83 2310036O22Rik  
84 Fmod  
85 Hebp1  
86 Tuba1c  
87 Lor  
88 Pgp  
89 Gm9493  
90 Rps2  
91 Acp1  
92 Sox3  
93 Wdr89  
94 Scand1  
95 Sox18  
96 Gm7729  
97 Fat4  
  
98 Dync2h1  
  
99 Kmt2d  
100 Sct1  
101 Rpl29  
102 H2afx  
103 Ccdc171  
104 Dnah6  
105 Lamb2  
106 Tusc1  
107 Zfp771  
108 Mrfap1  
109 Gm10020  
110 Rpl36  
111 Capn11  
112 H2afj  
113 Tpt1  
114 Rps12  
115 Rpl35  
116 Sox11  
117 Zfp428  
118 Rpl36-ps3  
119 Finc  
120 Ptpz1  
121 Ddx3y  
122 Nkain2  
123 Ahnak

124 Fat1  
125 Gm1673  
126 Kihl9  
127 Jund  
128 Gm10340  
129 Gm7292  
130 Gpr27  
131 Srp54a  
132 Wdfy1  
133 Hbb-bt  
134 Fat3  
135 Gm3558  
136 Gm2974  
137 Gm3411  
138 Gm2897  
139 Gm11273  
140 Ccdc85c  
141 Ier5l  
142 Gm3739  
143 Malat1  
144 Gm10406  
145 Gm3373  
146 Gm3526  
147 Ccdc85b  
148 Gm3500  
149 Gm9825  
150 Gm5796  
151 Gm3591

## Matrix of gene significant differences between conditions

(skip for Brainmap wt-v-ko comparisons)

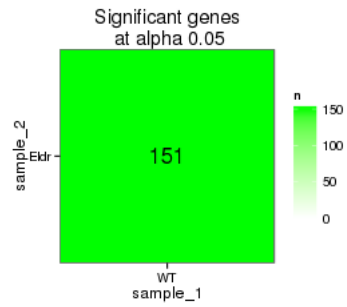

## Significant gene expression differences between conditions

Expression plot (genes):(turned off)

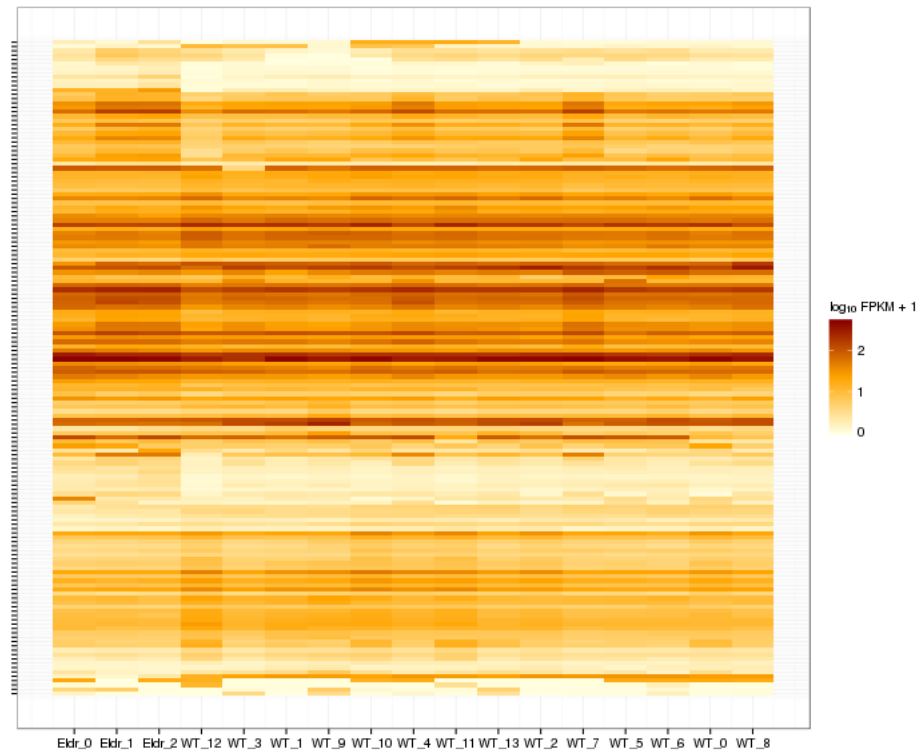

Significant genes with expression >50fpkm (any condition):(turned off)

An individual look at each of the highly expressed significantly differentially regulated genes: (eval=false for first pass)

# Expression-level/significance relationship

Scatter plot of significant genes only:

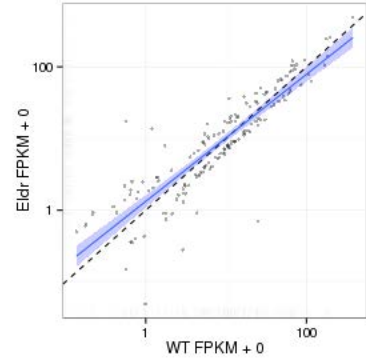

Volcano Plot

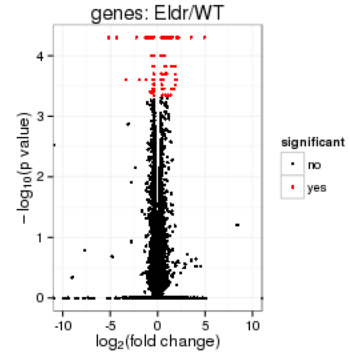

Volcano plot with significant genes only:

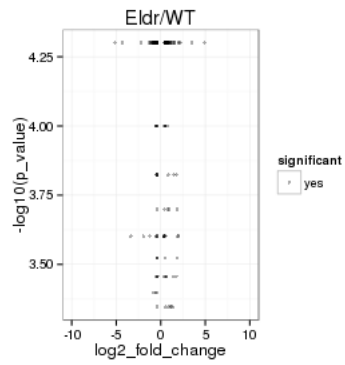

FoldChange Heatmap

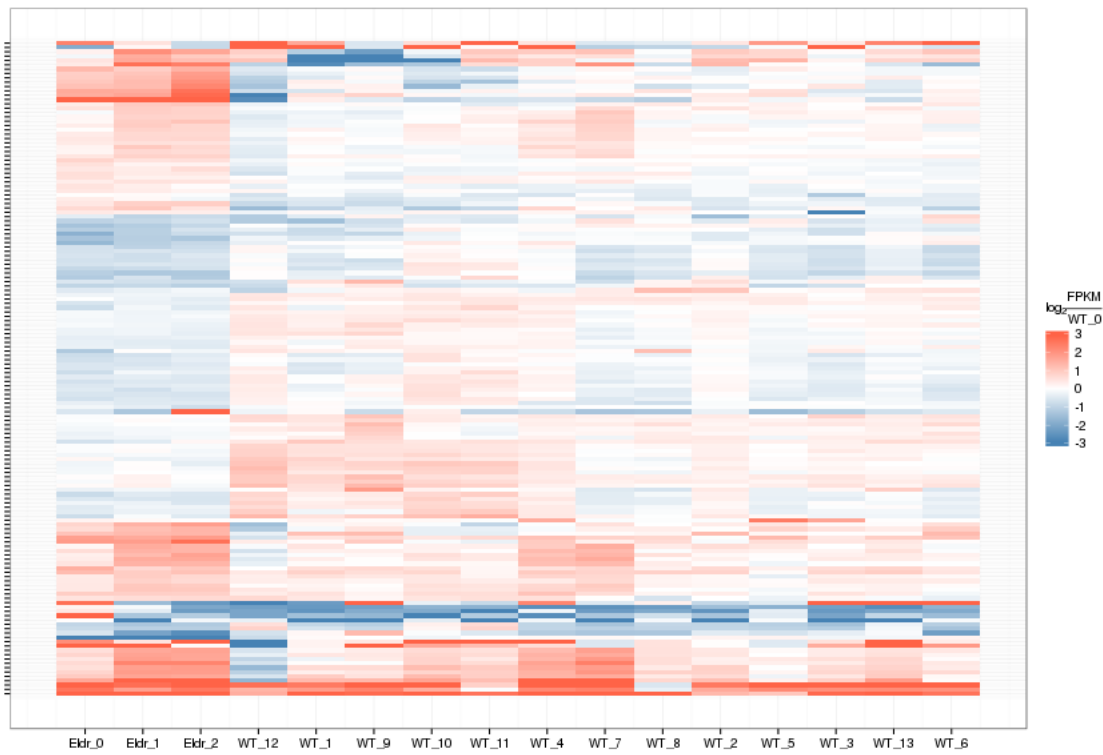

## Differential Splicing

Differential Isoforms between conditions

Per isoform difference between conditions:

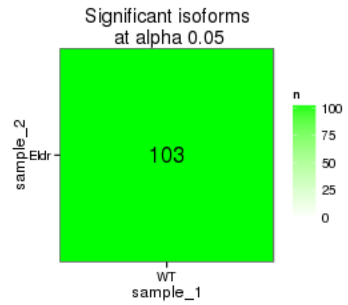

These isoforms are:

| iso | Annotation | gene_short_name |
|-----|------------|-----------------|
| 1   | Cdh1       | Cdh1            |
| 2   | Col1a1     | Col1a1          |
| 3   | Lamb1      | Lamb1           |
| 4   | Nid1       | Nid1            |
| 5   | Ttc9b      | Ttc9b           |
| 6   | Cad        | Cad             |
| 7   | Abca1      | Abca1           |
| 8   | Lama5      | Lama5           |
| 9   | Dync1h1    | Dync1h1         |
| 10  | Lama2      | Lama2           |
| 11  | Gm872      | Gm872           |
| 12  | Egfr       | Egfr            |
| 13  | Pold2      | Pold2           |
| 14  | Mrc2       | Mrc2            |
| 15  | Hoxb9      | Hoxb9           |
| 16  | Nid2       | Nid2            |
| 17  | Myh9       | Myh9            |
| 18  | Dlx2       | Dlx2            |
| 19  | Igf2r      | Igf2r           |
| 20  | Fbn2       | Fbn2            |
| 21  | Rps14      | Rps14           |
| 22  | Fasn       | Fasn            |
| 23  | Lbx1       | Lbx1            |
| 24  | Pgm2       | Pgm2            |
| 25  | Dst        | Dst             |
| 26  | Fn1        | Fn1             |

27 Lamc1  
28 Col5a1  
29 Notch1  
30 Lrp2  
31 Fbn1  
32 Notch2  
33 Tnc  
34 Svep1  
35 Snapc3  
36 Scp2  
  
37 Kcnq4  
38 Trp73  
39 Uncx  
40 Col1a2  
41 Slc13a4  
42 Itpr1  
43 Dera  
44 Eif3f  
45 Col12a1  
46 Lama1  
47 Szt2  
48 Adamts15  
49 Gbx2  
50 Prr7  
51 Fras1  
52 Leng8  
53 Cox8a  
54 Frem2  
55 Vstm2l  
56 Notch3  
57 Hoxb4  
58 Pcsk1n  
59 Kihl42  
60 Lrp1  
61 Tlx3  
62 C1qtnf4  
63 Dnah7b  
  
64 2310036O22Rik  
  
65 Reln  
66 Hebp1  
67 Tuba1c  
68 Gm9493



69 Wdr89  
70 Fat4  
71 Col6a3  
72 H2afx  
73 Ccdc171  
74 Lamb2  
75 Tusc1  
76 Zfp771  
77 Gm10020  
78 Rpl36  
79 H2afj  
80 Tpt1  
81 Rps12  
82 Sox11  
83 Ptpnz1  
84 Ddx3y  
85 Gpr98  
86 Ahnak  
87 Fat1  
88 Kih19  
89 Jund  
90 Gpr27  
91 Srp54a  
92 Hbb-bt  
93 Fat3  
94 Gm3558  
95 Gm2897  
96 Gm11273  
97 Ccdc85c  
98 Ier5l  
99 Malat1  
100 Ccdc85b  
101 Gm3500  
102 Gm9825  
103 Gm3591

Gene-level DE isoform heatmap

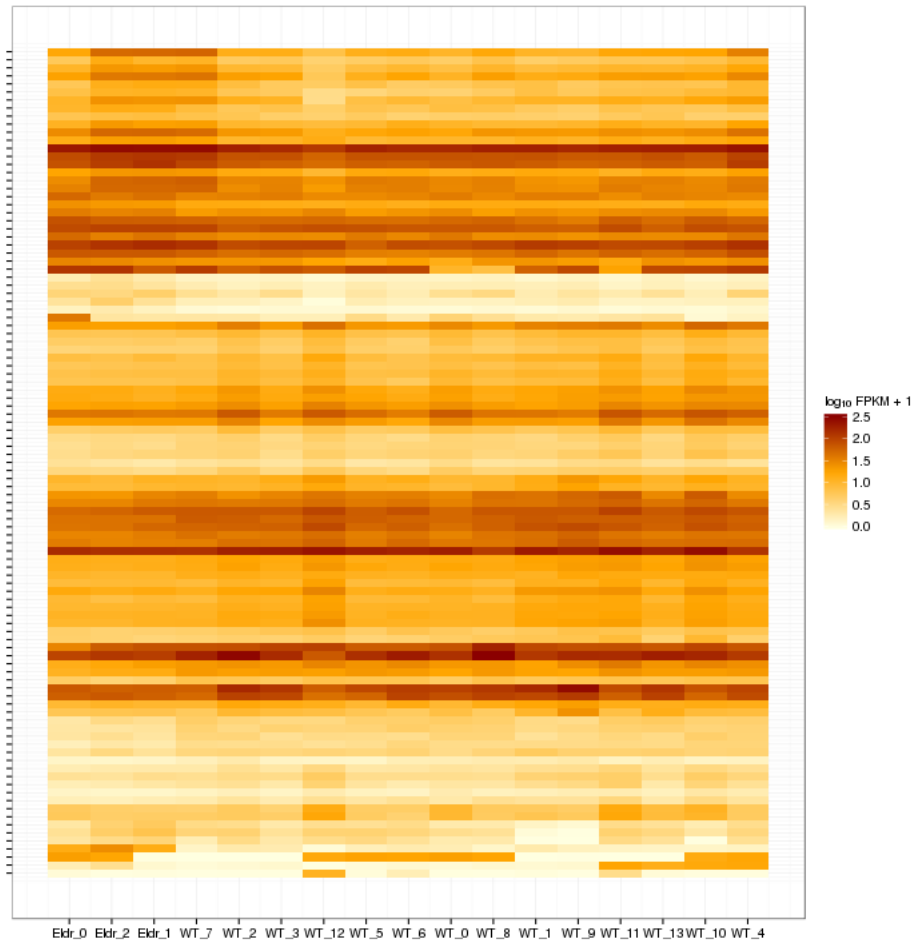

Isoform foldchange heatmap by isoform:

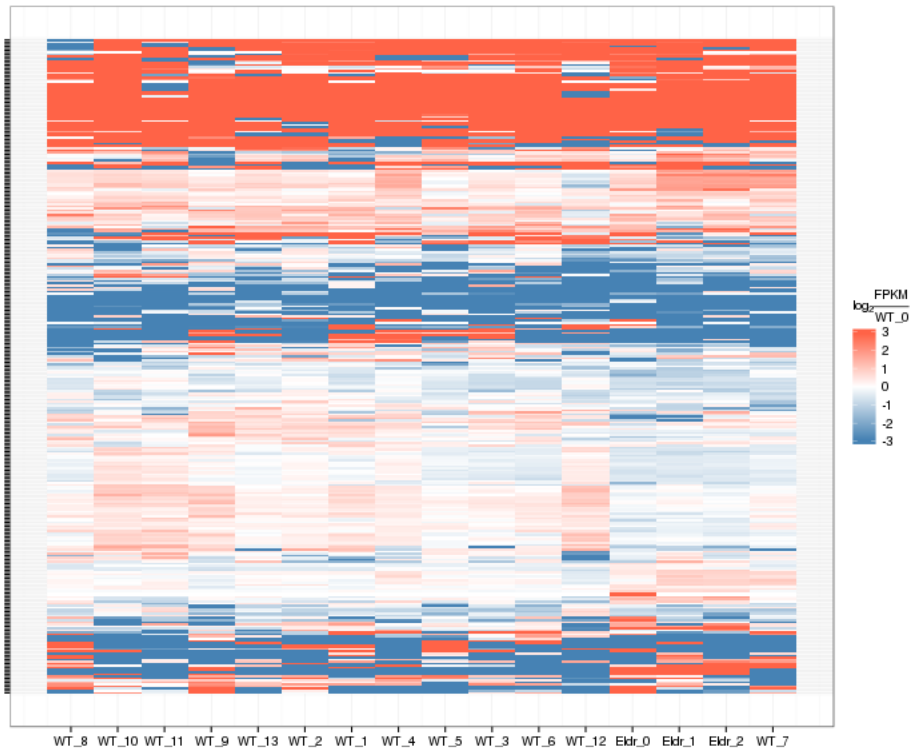

## Differential Splicing between conditions

(eval false for first pass)

Per condition differences in isoforms (Does gene have diff piechart between conditions?)

These genes are:

Splicing heatmap by isoform:

Splicing heatmap by gene

The following are significantly differentially spliced genes (relative portion of isoform per condition):

## Gene/Pathway Analysis

### GSEA

Enrichment and zscores are calculated based on expression in KO vs WT ( $\text{fpkmKO}/\text{fpkmWT}$ ), so genes that are down regulated in KO are shown in blue, while upregulation is shown in red.

KOWT Blue = down in KO Red = Up in KO

Biocarta enrichment:

```
## Error: `x` must have at least 2 rows and 2 columns
```

Biocarta zscore:

```
## Error: incorrect number of dimensions
```

```
## Error: object 'x_ordered' not found
```

```
## Error: error in evaluating the argument 'x' in selecting a method for function 'as.matrix': Error: object 'x_ordered' not found
```

```
## Error: object 'x_ordered' not found
```

Reactome enrichment:

```
## Error: subscript out of bounds
```

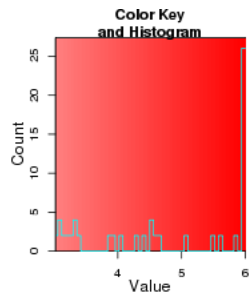

\_\_\_\_\_

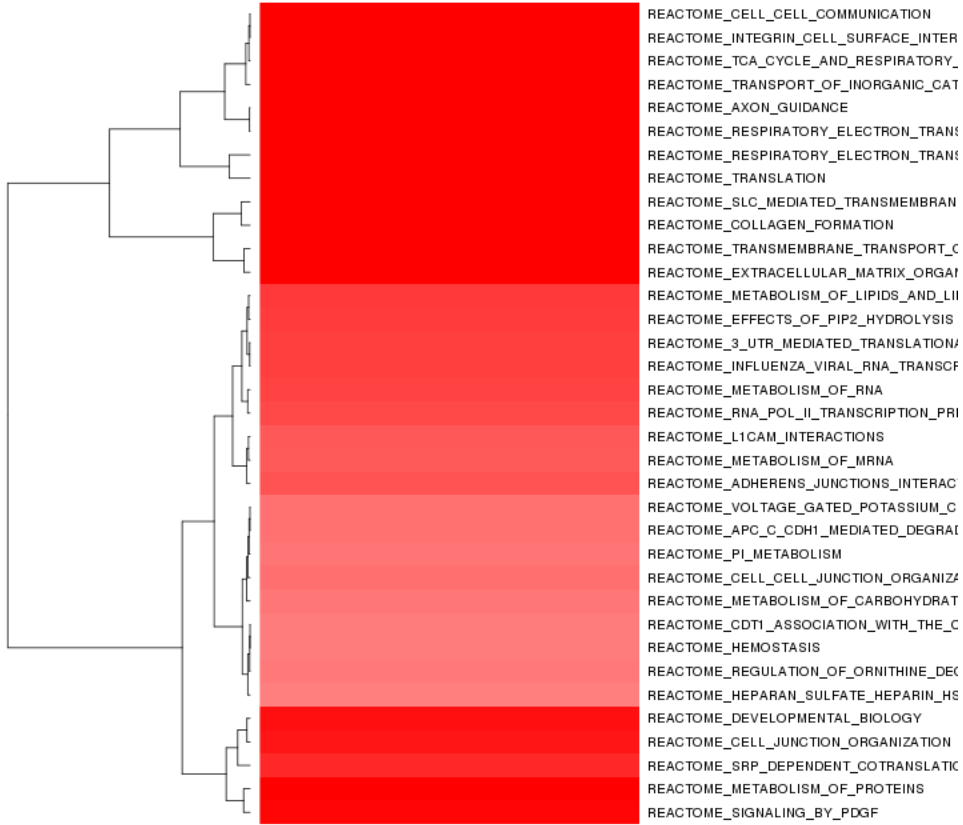

Reactome zscore:

## Error: subscript out of bounds

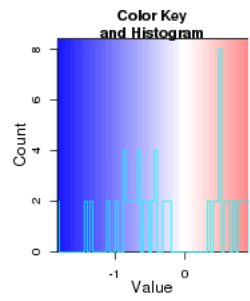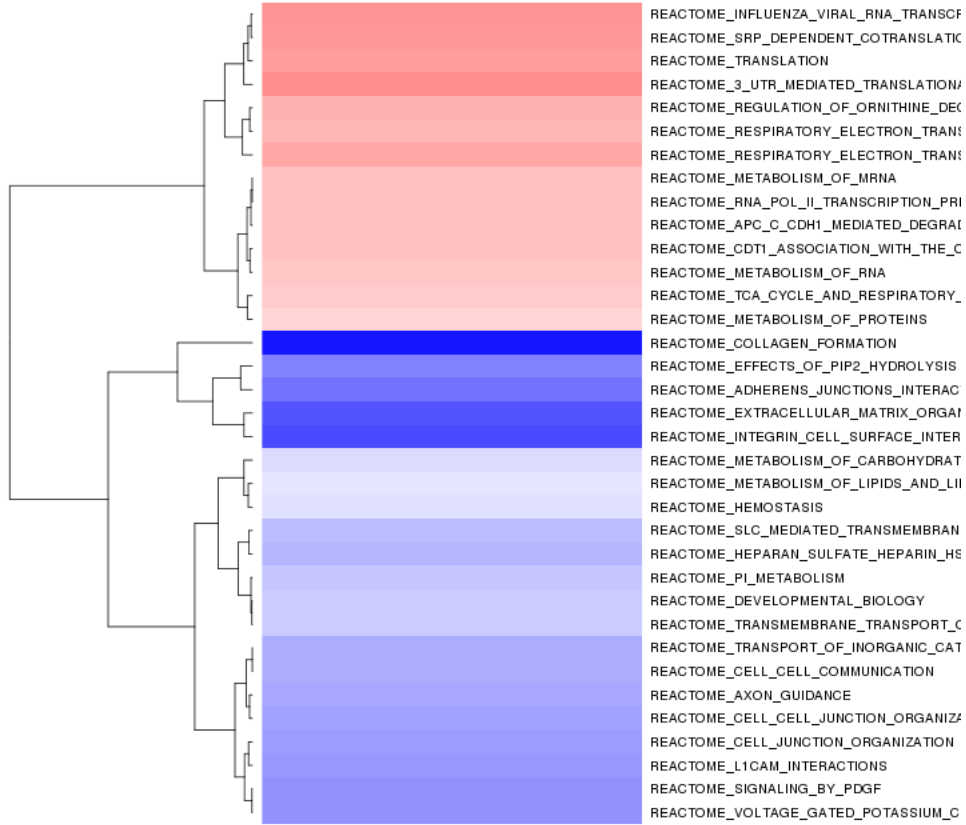

Kegg enrichment:

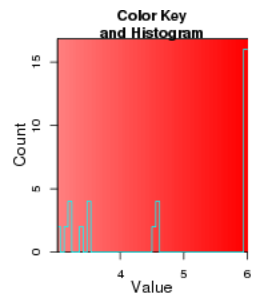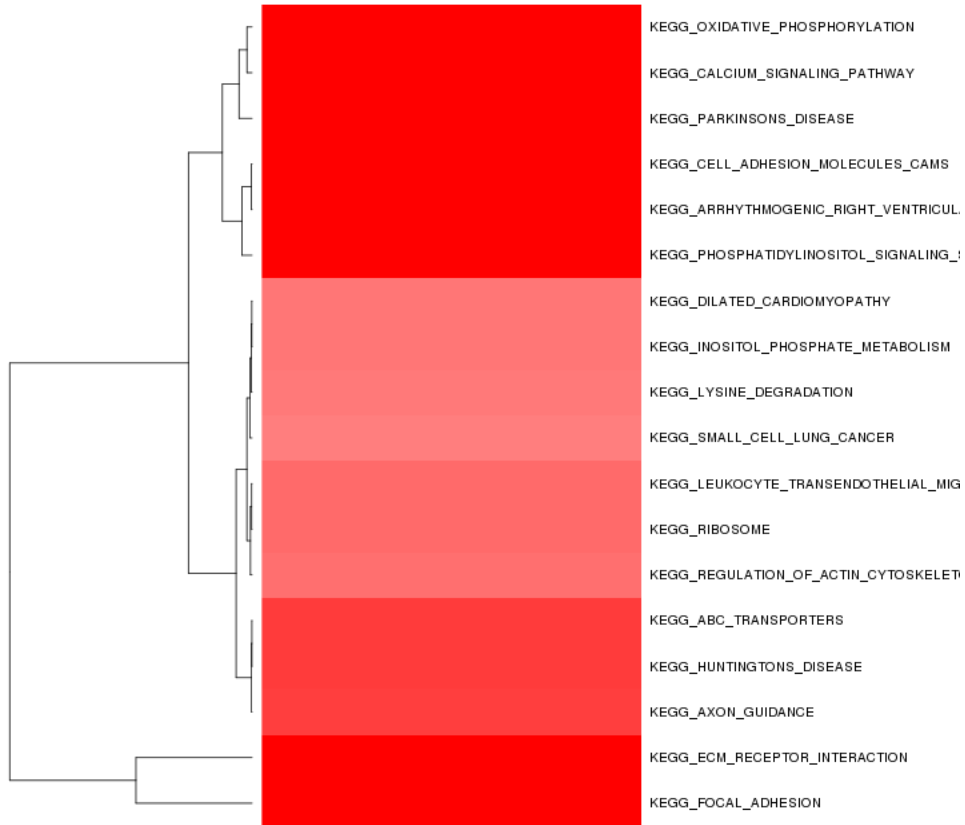

Kegg zscore:

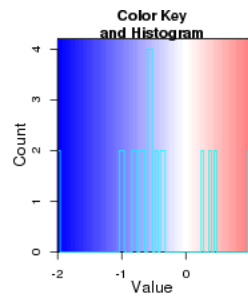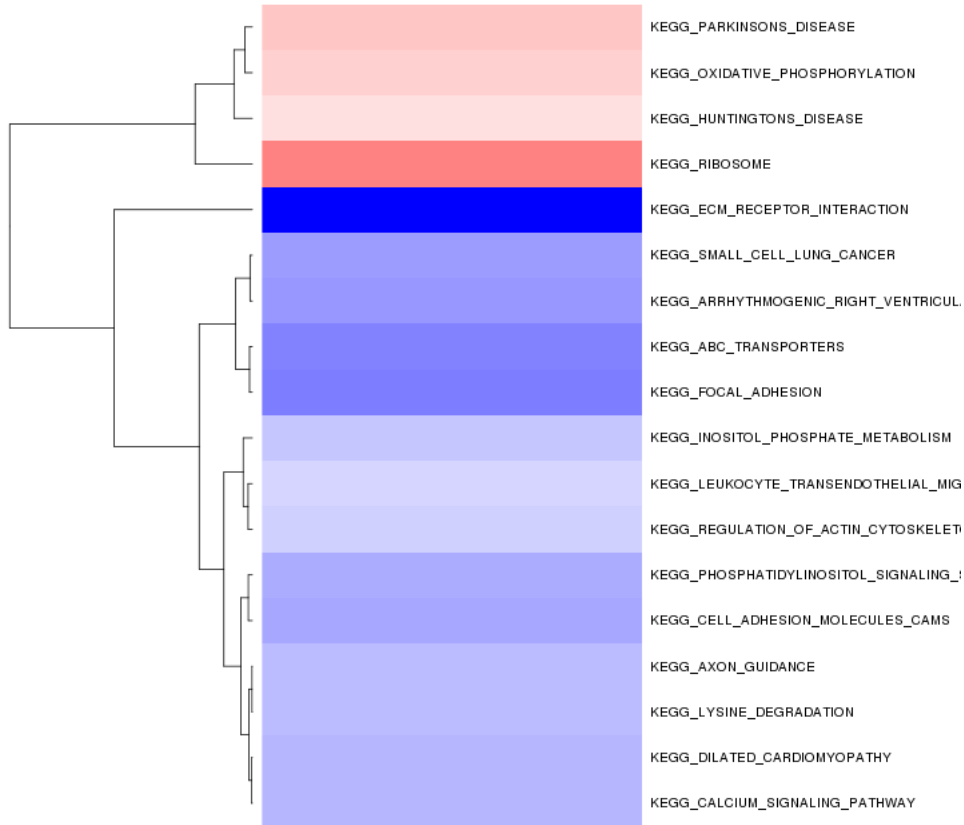

Interneuron enrichment:

## Error: no locations are finite



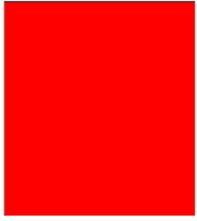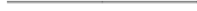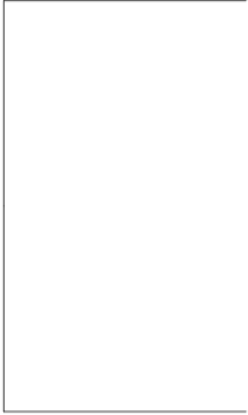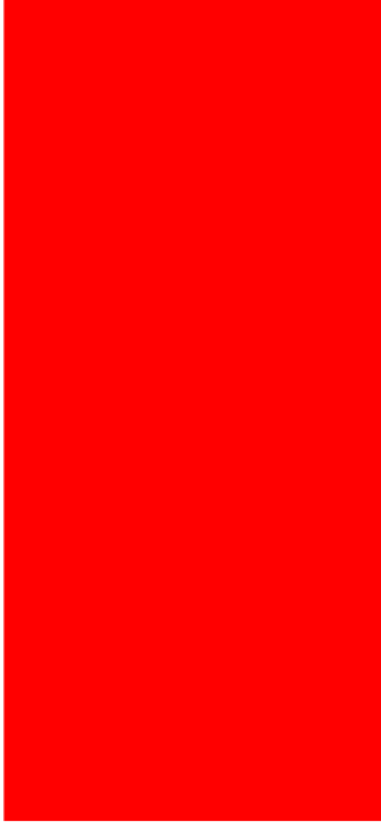

5HT\_genes

Lhx6\_genes

Interneuron zscore:

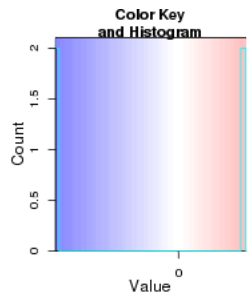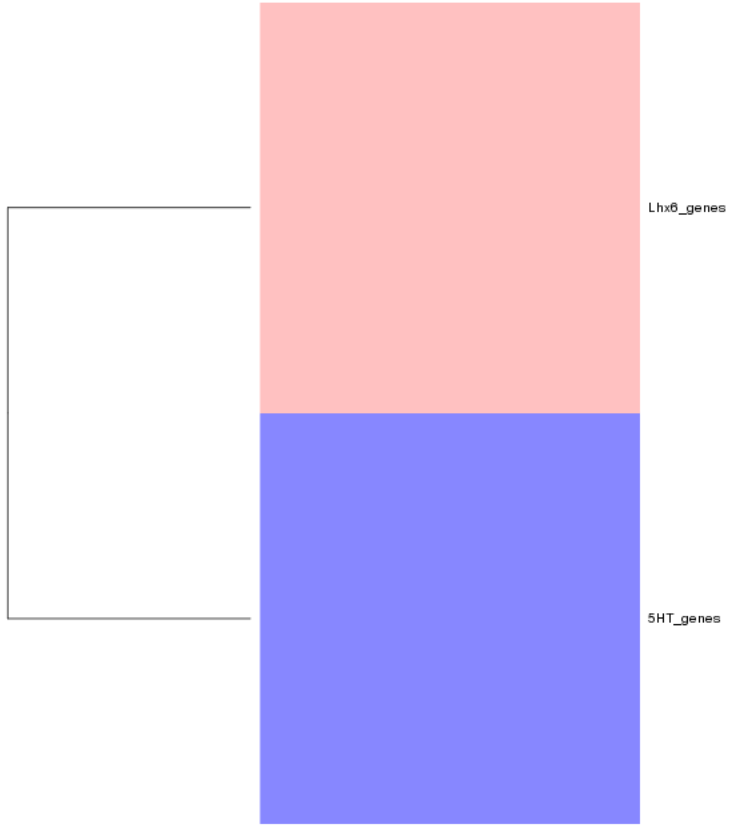

Oncogene enrichment:

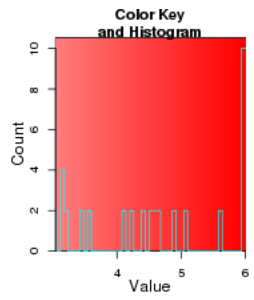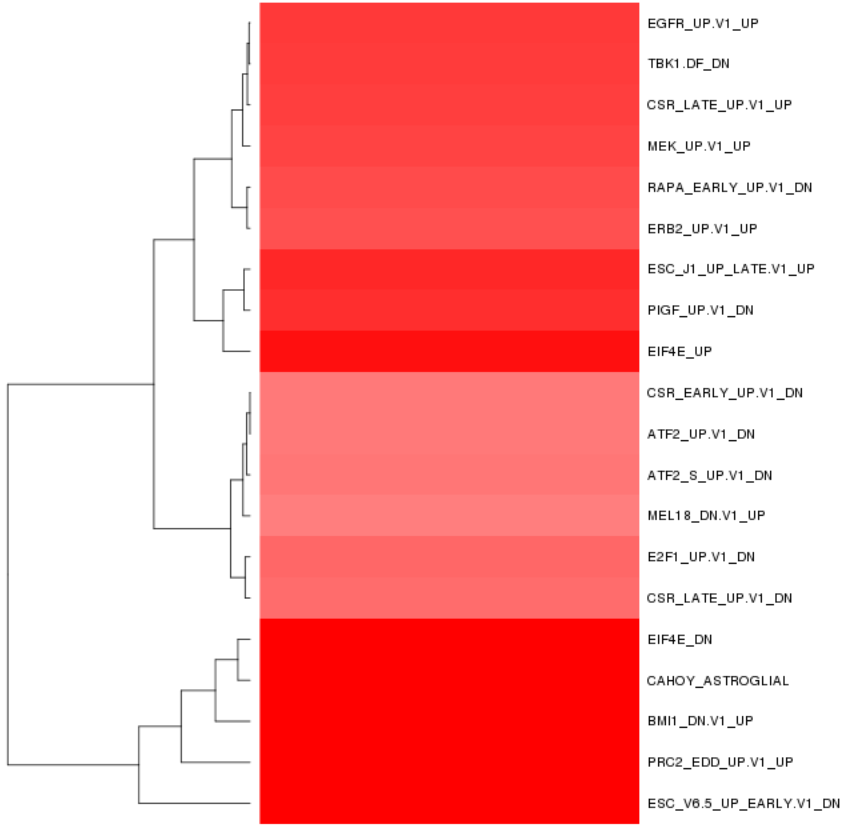

Oncogene zscore:

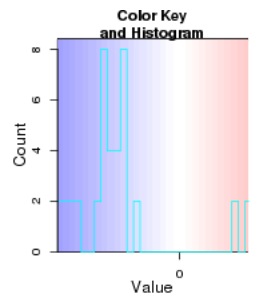

\_\_\_\_\_

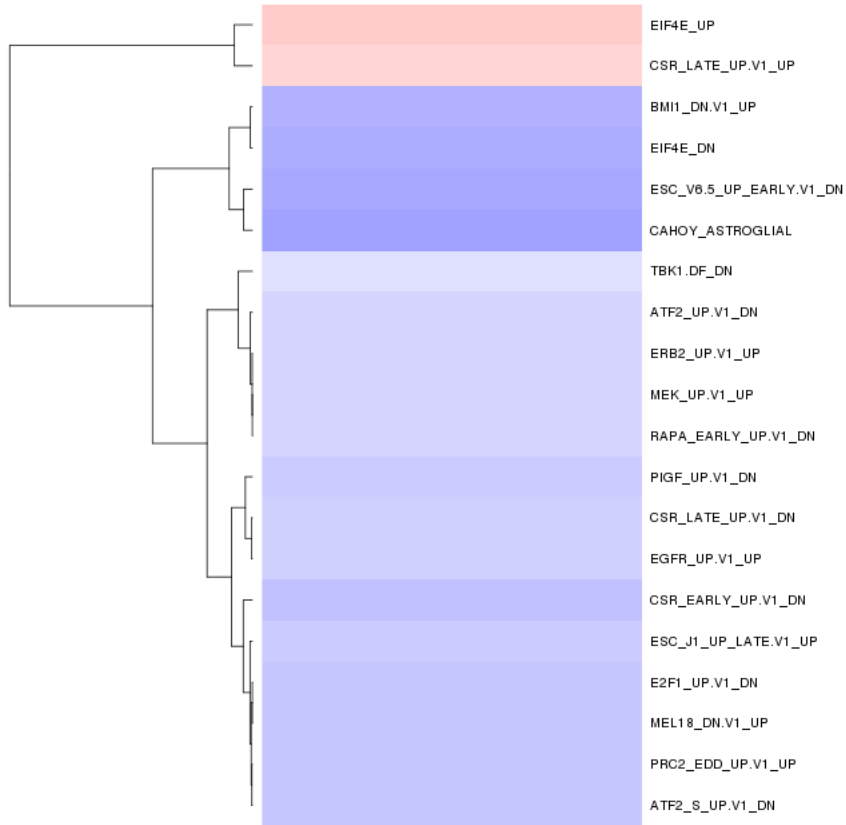

Immuno enrichment:

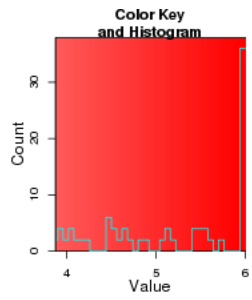

\_\_\_\_\_

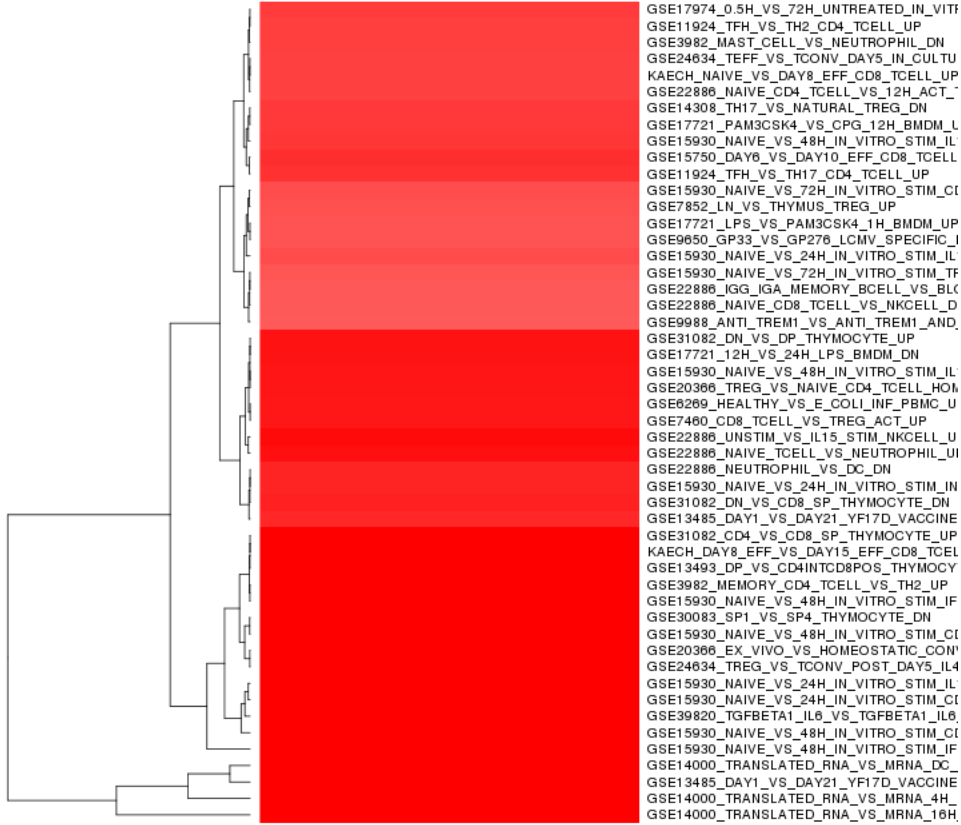

Immuno zscore:

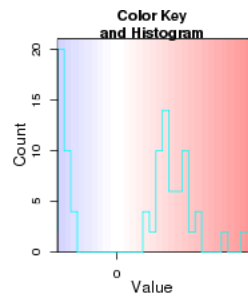

\_\_\_\_\_

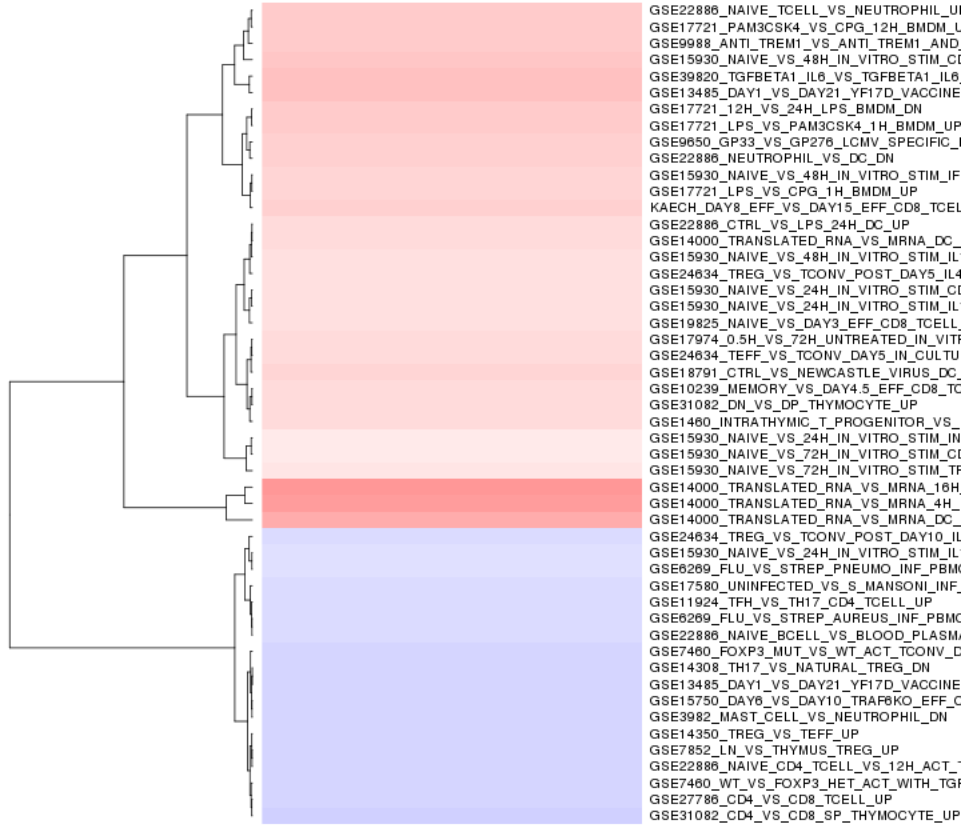

TF enrichment:

## Error: subscript out of bounds

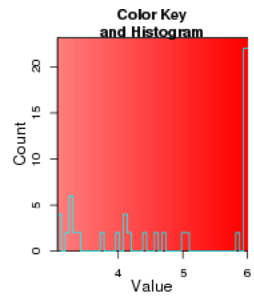

\_\_\_\_\_

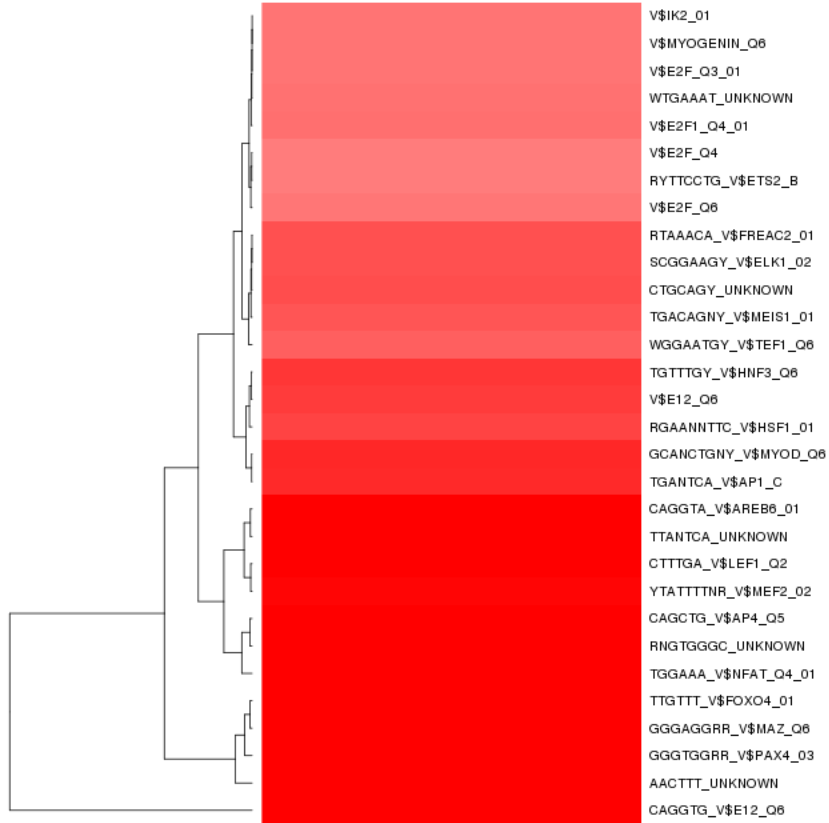

TF zscore:

## Error: subscript out of bounds

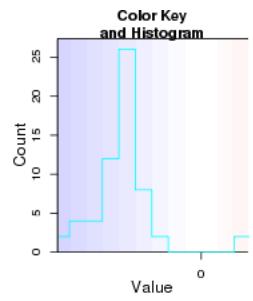

\_\_\_\_\_

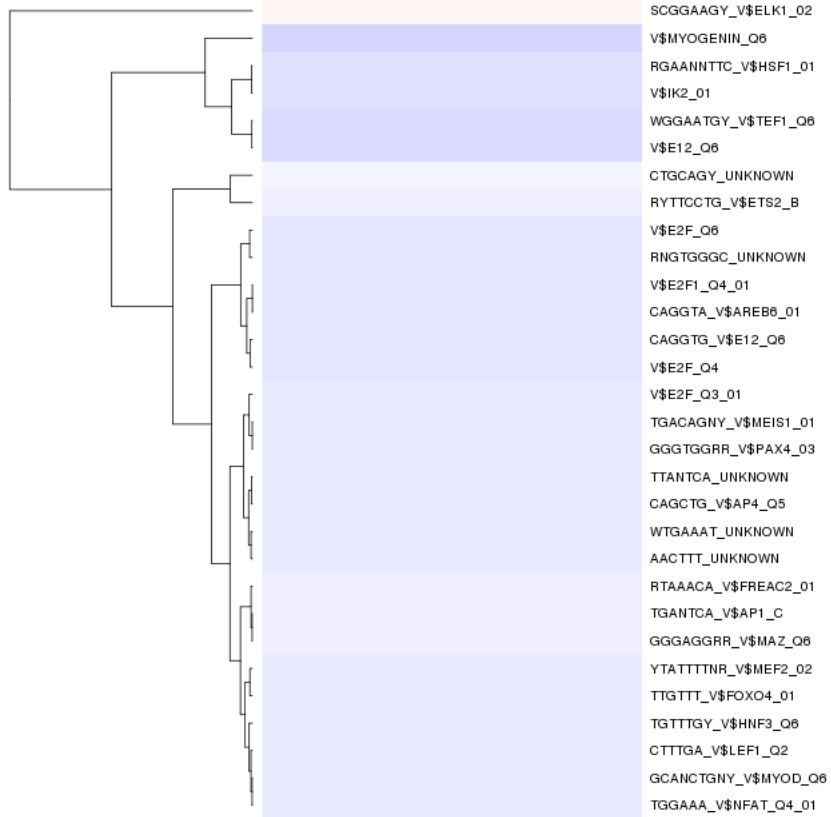

## GO enrichment

Cluster profiler used to call enrichments of significantly differentially regulated genes that map to Entrez IDs.



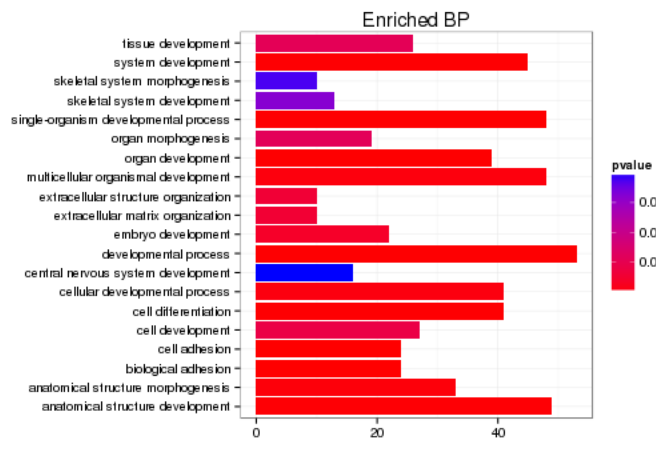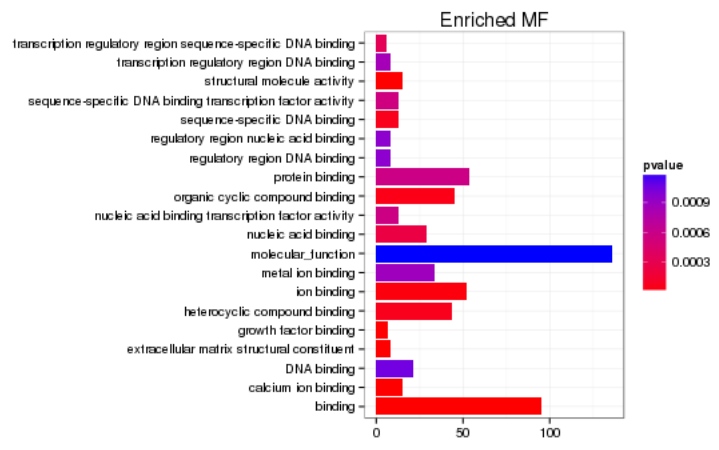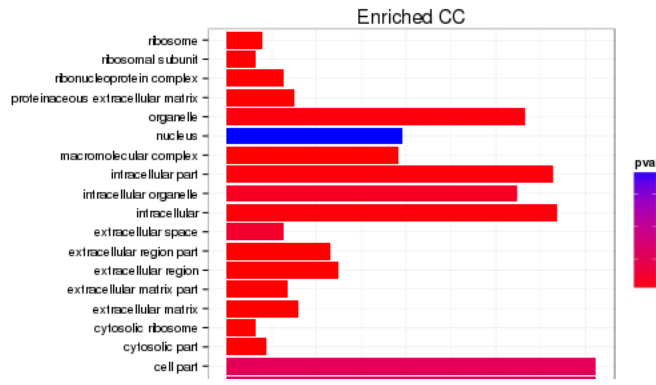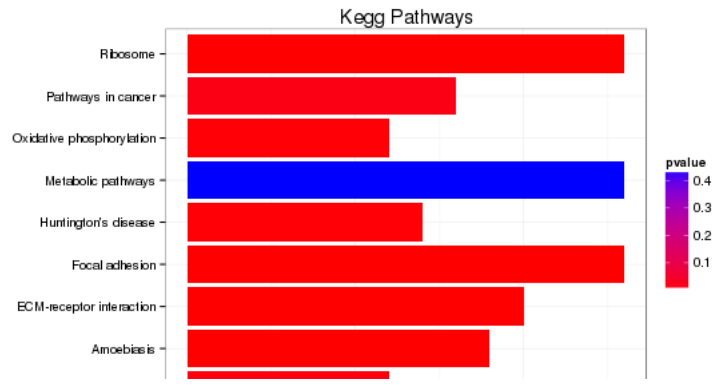

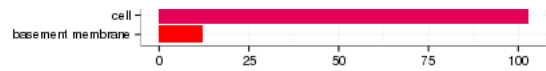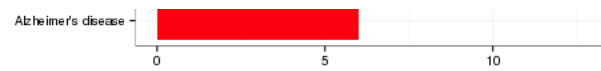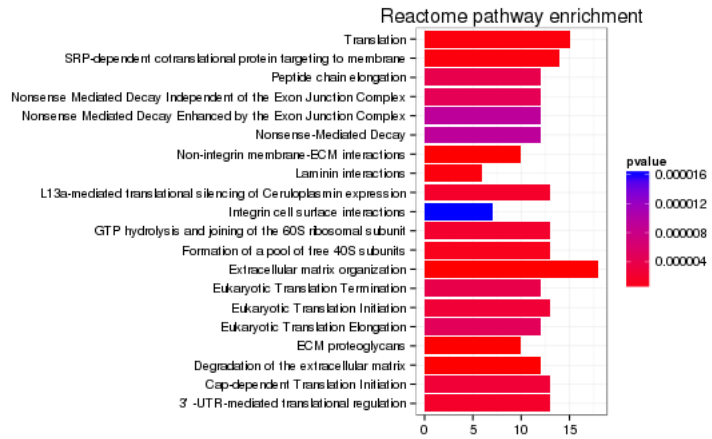

**Enrichment or depletion for stage-specific cell cycle markers**



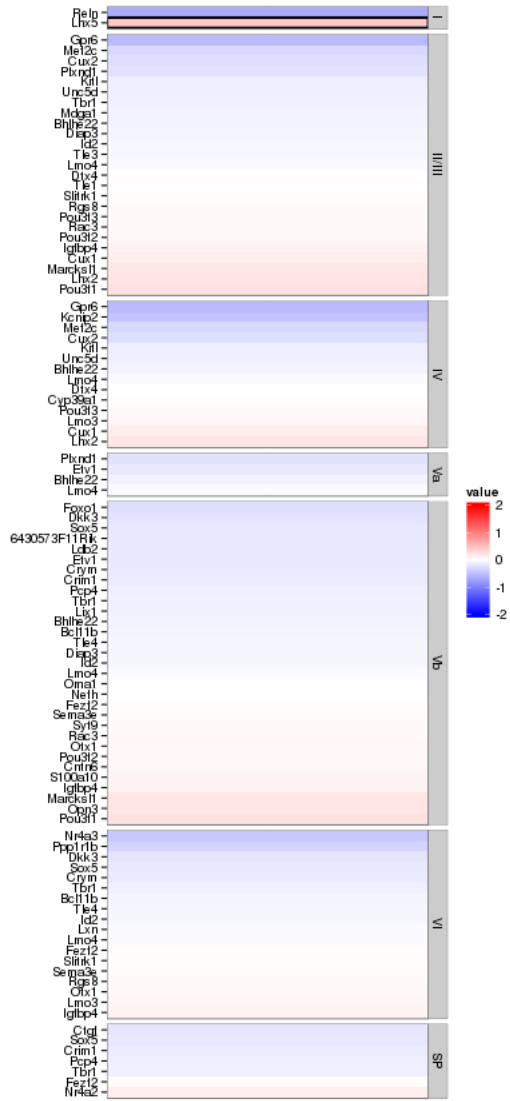

Enrichment or depletion for specific neural cell types

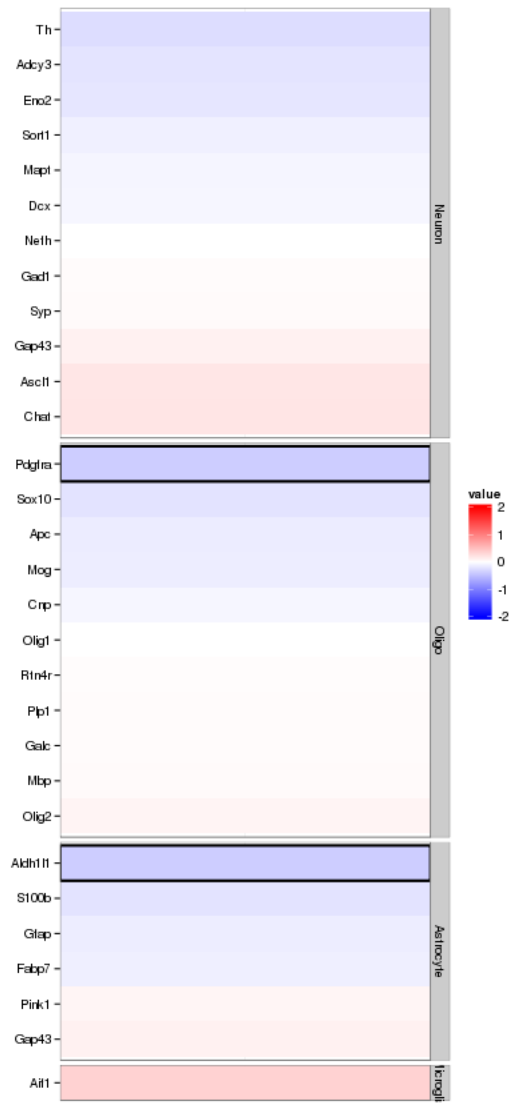

**Enrichment or Depletion of neural differentiation markers**

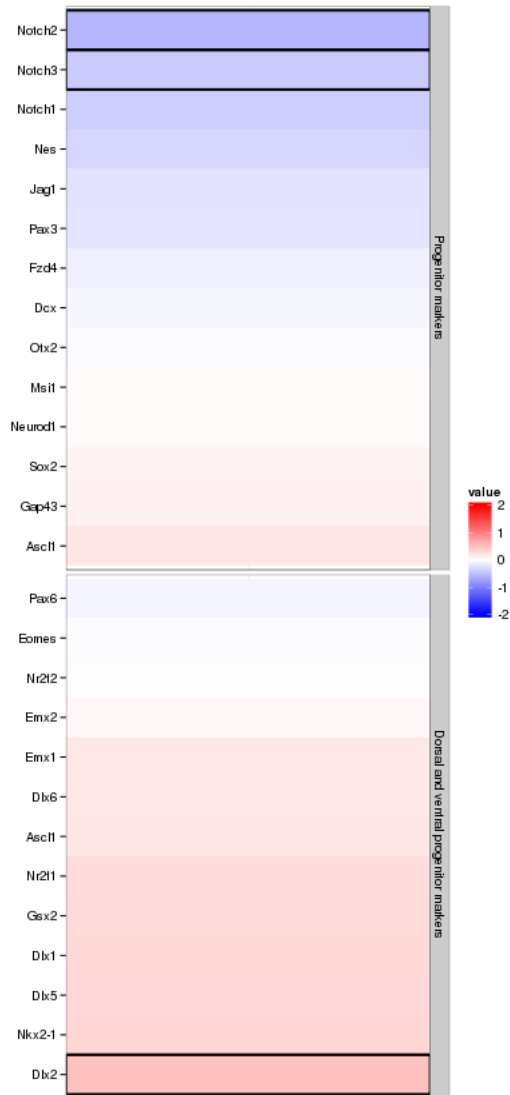

## Cis vs Trans (locally)

$\log_2$  Foldchange and test statistic are calculated with the ratio of  $\text{fpm(KO)}/\text{fpm(WT)}$ , thus the test\_stat is positive if a gene is higher in the KO and negative if a gene has lower expression in the KO

The pvalue for 1 genes significantly regulated in a region this size is: 0.3083

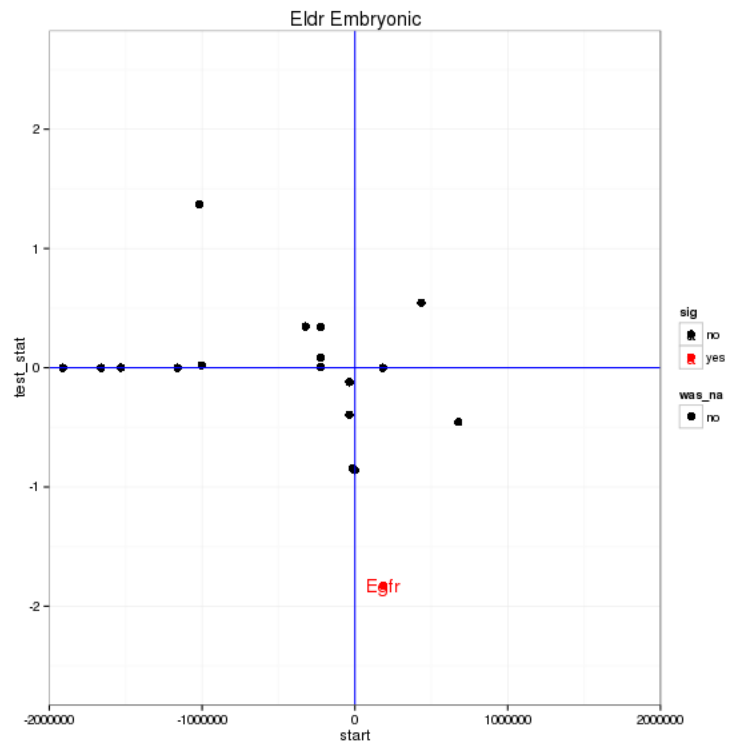

## Notes

Samples used are:

10

- 1 JR753
- 2 JR750
- 3 JR771
- 4 JR755
- 5 JR811
- 6 JR768
- 7 JR761
- 8 JR815
- 9 JR789
- 10 JR748
- 11 JR716
- 12 JR717
- 13 JR719
- 14 JR756

15 JR787  
16 JR810  
17 JR838

## Replicates

| file                                                                          | sample_name | replicate | rep_name | total_mass  | norm_mass   | internal_scale | external_scale |
|-------------------------------------------------------------------------------|-------------|-----------|----------|-------------|-------------|----------------|----------------|
| 1 /n/rinn_data1/seq/fgoff/Projects/BrainMap/data/quants/JR753/abundances.cxb  | WT          | 0         | WT_0     | 39331900.00 | 32543000.00 | 1.25           | 1.00           |
| 2 /n/rinn_data1/seq/fgoff/Projects/BrainMap/data/quants/JR750/abundances.cxb  | WT          | 1         | WT_1     | 36031100.00 | 32543000.00 | 1.09           | 1.00           |
| 3 /n/rinn_data1/seq/fgoff/Projects/BrainMap/data/quants/JR771/abundances.cxb  | WT          | 2         | WT_2     | 38857100.00 | 32543000.00 | 1.22           | 1.00           |
| 4 /n/rinn_data1/seq/fgoff/Projects/BrainMap/data/quants/JR755/abundances.cxb  | WT          | 3         | WT_3     | 41811300.00 | 32543000.00 | 1.27           | 1.00           |
| 5 /n/rinn_data1/seq/fgoff/Projects/BrainMap/data/quants/JR811/abundances.cxb  | WT          | 4         | WT_4     | 38172800.00 | 32543000.00 | 1.19           | 1.00           |
| 6 /n/rinn_data1/seq/fgoff/Projects/BrainMap/data/quants/JR768/abundances.cxb  | WT          | 5         | WT_5     | 28375200.00 | 32543000.00 | 0.88           | 1.00           |
| 7 /n/rinn_data1/seq/fgoff/Projects/BrainMap/data/quants/JR761/abundances.cxb  | WT          | 6         | WT_6     | 31706200.00 | 32543000.00 | 0.96           | 1.00           |
| 8 /n/rinn_data1/seq/fgoff/Projects/BrainMap/data/quants/JR815/abundances.cxb  | WT          | 7         | WT_7     | 29733100.00 | 32543000.00 | 0.91           | 1.00           |
| 9 /n/rinn_data1/seq/fgoff/Projects/BrainMap/data/quants/JR789/abundances.cxb  | WT          | 8         | WT_8     | 27681500.00 | 32543000.00 | 0.85           | 1.00           |
| 10 /n/rinn_data1/seq/fgoff/Projects/BrainMap/data/quants/JR748/abundances.cxb | WT          | 9         | WT_9     | 32367000.00 | 32543000.00 | 0.95           | 1.00           |
| 11 /n/rinn_data1/seq/fgoff/Projects/BrainMap/data/quants/JR716/abundances.cxb | WT          | 10        | WT_10    | 26144700.00 | 32543000.00 | 0.80           | 1.00           |
| 12 /n/rinn_data1/seq/fgoff/Projects/BrainMap/data/quants/JR717/abundances.cxb | WT          | 11        | WT_11    | 25565400.00 | 32543000.00 | 0.79           | 1.00           |
| 13 /n/rinn_data1/seq/fgoff/Projects/BrainMap/data/quants/JR719/abundances.cxb | WT          | 12        | WT_12    | 22697800.00 | 32543000.00 | 0.68           | 1.00           |
| 14 /n/rinn_data1/seq/fgoff/Projects/BrainMap/data/quants/JR756/abundances.cxb | WT          | 13        | WT_13    | 38948900.00 | 32543000.00 | 1.20           | 1.00           |
| 15 /n/rinn_data1/seq/fgoff/Projects/BrainMap/data/quants/JR787/abundances.cxb | Eldr        | 0         | Eldr_0   | 26894700.00 | 32543000.00 | 0.83           | 1.00           |
| 16 /n/rinn_data1/seq/fgoff/Projects/BrainMap/data/quants/JR810/abundances.cxb | Eldr        | 1         | Eldr_1   | 41828800.00 | 32543000.00 | 1.29           | 1.00           |
| 17 /n/rinn_data1/seq/fgoff/Projects/BrainMap/data/quants/JR838/abundances.cxb | Eldr        | 2         | Eldr_2   | 37002600.00 | 32543000.00 | 1.15           | 1.00           |

## Session Info

```
## R version 3.0.2 (2013-09-25)
## Platform: x86_64-unknown-linux-gnu (64-bit)
##
## locale:
## [1] LC_CTYPE=en_US.UTF-8      LC_NUMERIC=C
## [3] LC_TIME=en_US.UTF-8      LC_COLLATE=en_US.UTF-8
## [5] LC_MONETARY=en_US.UTF-8  LC_MESSAGES=en_US.UTF-8
## [7] LC_PAPER=en_US.UTF-8     LC_NAME=C
## [9] LC_ADDRESS=C             LC_TELEPHONE=C
## [11] LC_MEASUREMENT=en_US.UTF-8 LC_IDENTIFICATION=C
##
## attached base packages:
## [1] grid      parallel  methods  stats    graphics  grDevices  utils
## [8] datasets  base
##
## other attached packages:
## [1] plyr_1.8.1
## [2] stringr_0.6.2
## [3] seqbias_1.10.0
```



```

## [4] BSgenome.Mmusculus.UCSC.mm10_1.3.19
## [5] BSgenome_1.30.0
## [6] Biostrings_2.30.1
## [7] gdata_2.13.3
## [8] GO.db_2.10.1
## [9] org.Mm.eg.db_2.10.1
## [10] clusterProfiler_1.13.1
## [11] DOSE_2.0.0
## [12] ReactomePA_1.6.1
## [13] AnnotationDbi_1.24.0
## [14] Biobase_2.22.0
## [15] mgcv_1.7-29
## [16] nlme_3.1-117
## [17] RMySQL_0.9-3
## [18] RColorBrewer_1.0-5
## [19] gridExtra_0.9.1
## [20] gtable_0.1.2
## [21] marray_1.40.0
## [22] gplots_2.13.0
## [23] GSA_1.03
## [24] limma_3.18.13
## [25] xtable_1.7-3
## [26] cummeRbund_2.7.2
## [27] Gviz_1.6.0
## [28] rtracklayer_1.22.7
## [29] GenomicRanges_1.14.4
## [30] XVector_0.2.0
## [31] IRanges_1.20.7
## [32] fastcluster_1.1.13
## [33] reshape2_1.4
## [34] ggplot2_1.0.0
## [35] RSQLite_0.11.4
## [36] DBI_0.2-7
## [37] BiocGenerics_0.8.0
## [38] knitr_1.6
##
## loaded via a namespace (and not attached):
## [1] biomaRt_2.18.0      biovizBase_1.10.8   bitops_1.0-6
## [4] caTools_1.17        cluster_1.15.2      colorspace_1.2-4
## [7] dichromat_2.0-0     digest_0.6.4        DO.db_2.7
## [10] evaluate_0.5.5      formatR_0.10        Formula_1.1-1
## [13] GenomicFeatures_1.14.5 GOSemSim_1.20.3     graph_1.40.1
## [16] graphite_1.8.1      gtools_3.4.1        Hmisc_3.14-4
## [19] igraph_0.7.1        KEGG.db_2.10.1     KernSmooth_2.23-12
## [22] labeling_0.2        lattice_0.20-29     latticeExtra_0.6-26
## [25] MASS_7.3-33         Matrix_1.1-3        munsell_0.4.2
## [28] org.Hs.eg.db_2.10.1 proto_0.3-10        qvalue_1.36.0
## [31] Rcpp_0.11.2         RCurl_1.95-4.1     reactome.db_1.46.1
## [34] Rsamtools_1.14.3    scales_0.2.4        splines_3.0.2
## [37] stats4_3.0.2        survival_2.37-7     tcltk_3.0.2
## [40] tools_3.0.2         XML_3.98-1.1       zlibbioc_1.8.0

```

## Run Info

```
##          param
## 1      cmd_line
## 2          version
## 3  SVN_revision
## 4  boost_version
## 5          genome
##
## 1 cuffdiff -p 10 -L WT,Eldr -o /n/rinn_data1/seq/lgoff/Projects/BrainMap/data/diffs/Eldr_vs_WT_Embryonic /n/rinn_data1/seq/lgoff/Projects/BrainMap/data/
## 2
## 3
## 4
## 5
```

# Haunt KO vs WT (Adult)

This file shows the wt-v-ko comparison for Haunt.

Cuff overview:

```
## CuffSet instance with:  
## 2 samples  
## 26754 genes  
## 77524 isoforms  
## 0 TSS  
## 23066 CDS  
## 0 promoters  
## 0 splicing  
## 19954 relCDS
```

## QC

### Dispersion

Dispersion plot for genes in cuff: (Overdispersion can lead to innacurate quants)

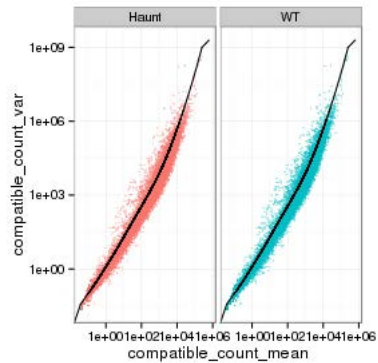

### Cross-replicate variability (fpkmSCVplot)

Differences in CV 2 can result in lower numbers of differentially expressed genes due to a higher degree of variability between replicate fpkm estimates.

Genes:

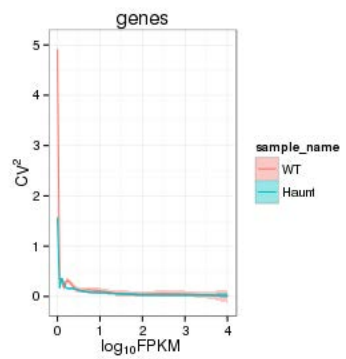

Isoforms:

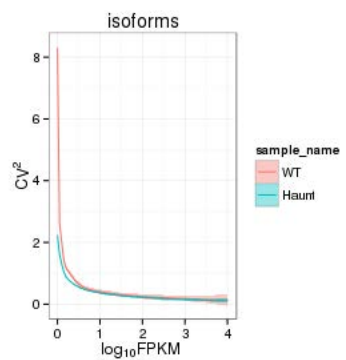

## MvA plot

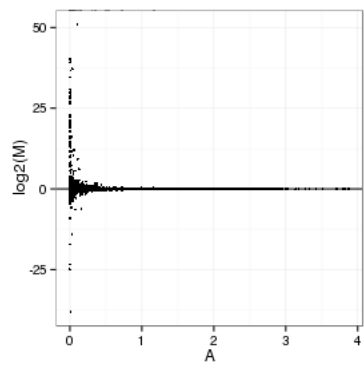

MvA plot counts

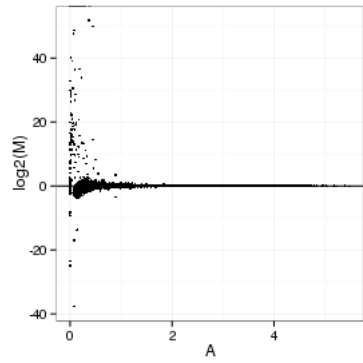

## Scatterplot matrix

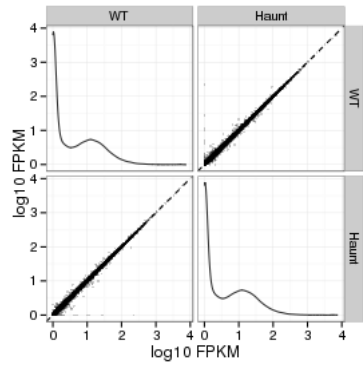

## Distributions

### Boxplots

Boxplot (genes)

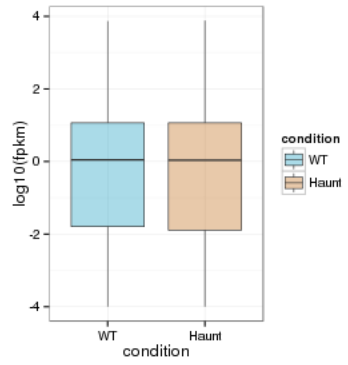

Boxplot (genes, replicates)

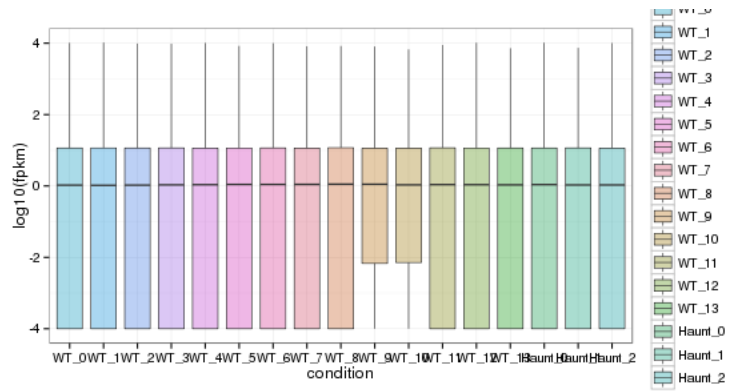

Boxplot (isoforms)

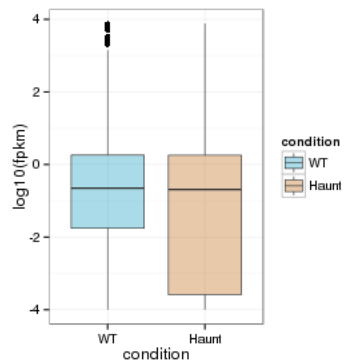

Boxplot (isoforms, replicates)

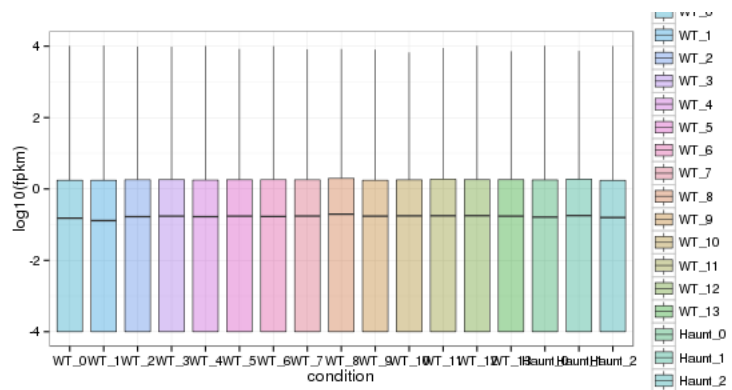

## Density

Density (genes)

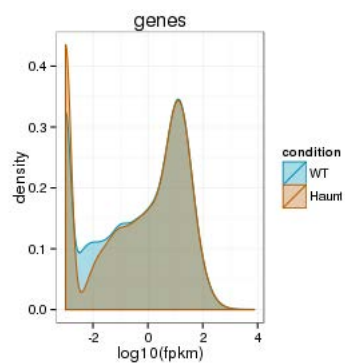

Density (genes, replicates)

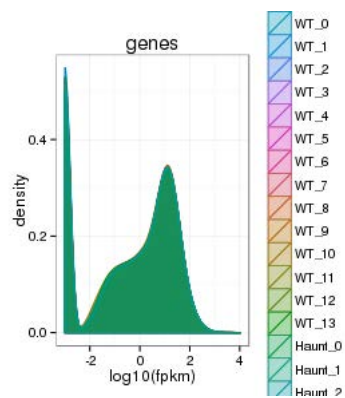

# Clustering

## Replicate Clusters

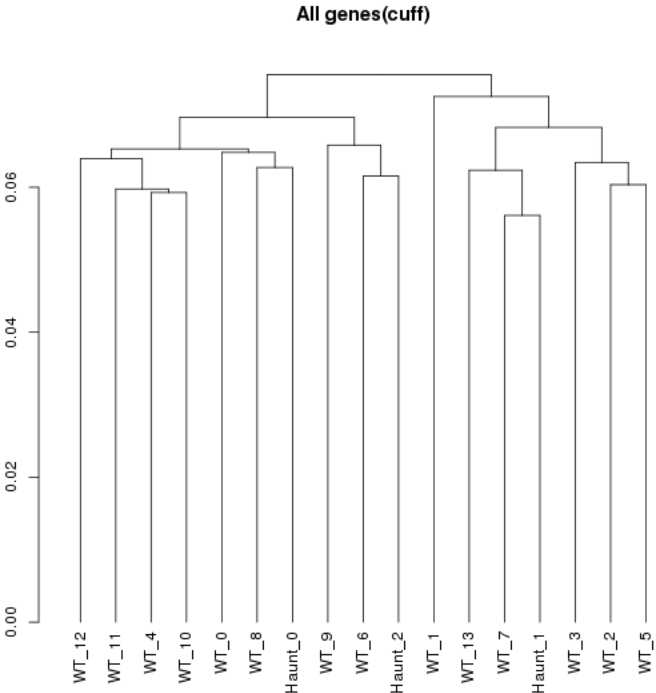

## NULL

## PCA (genes)



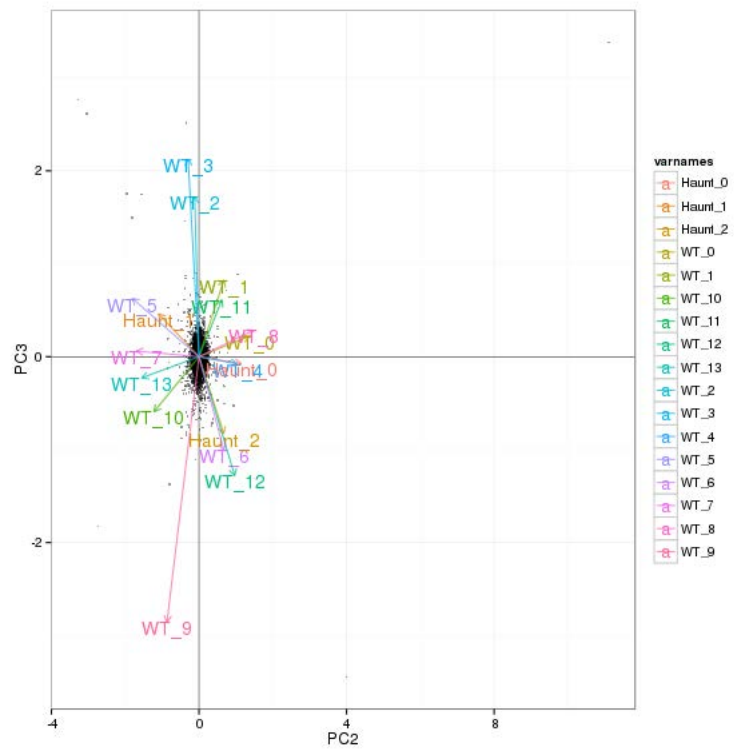

**MDS (genes)**

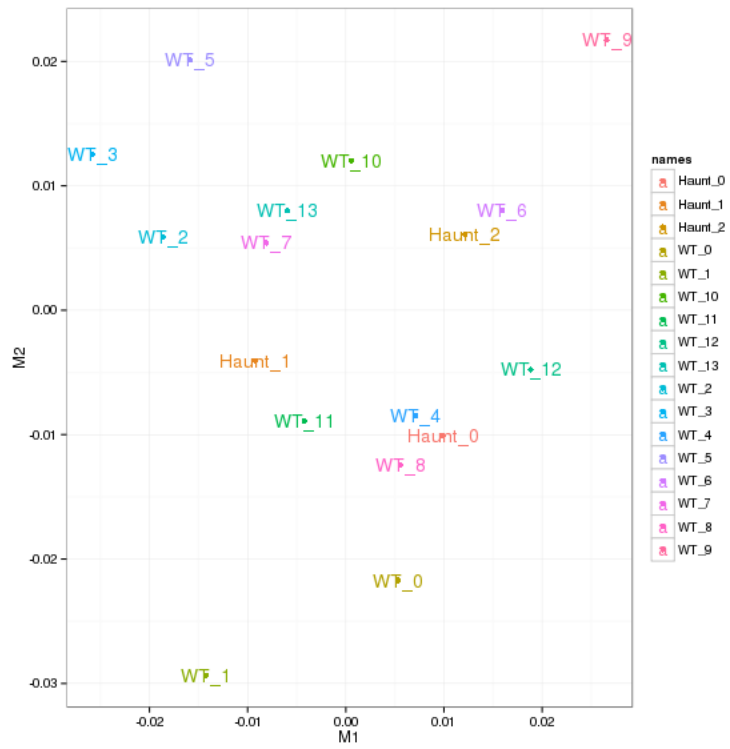

## KO assessment

Endogenous lncRNA expression

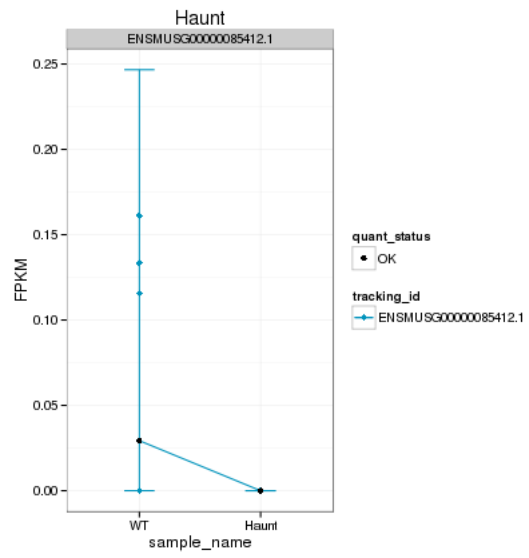

Endogenous expression of Haunt isoforms:

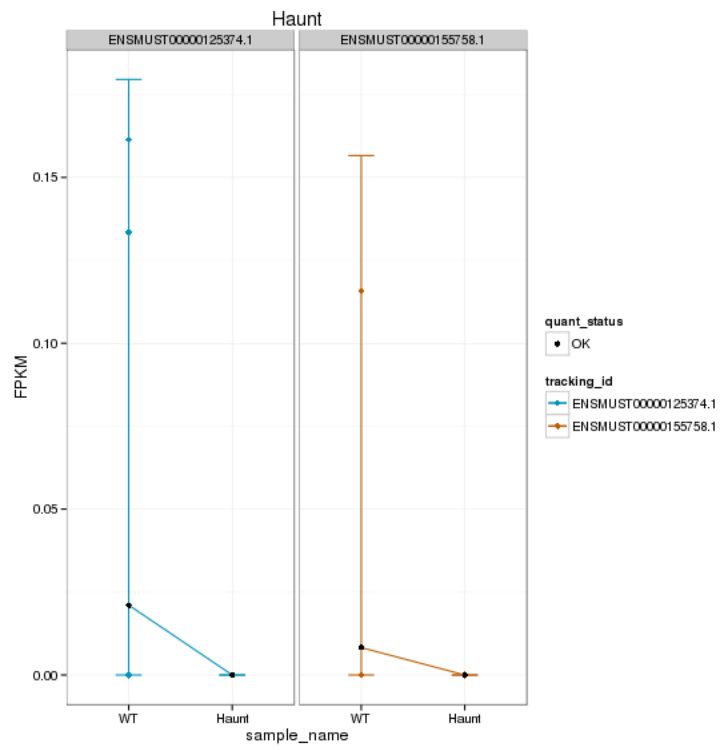

Barplot of gene expression:

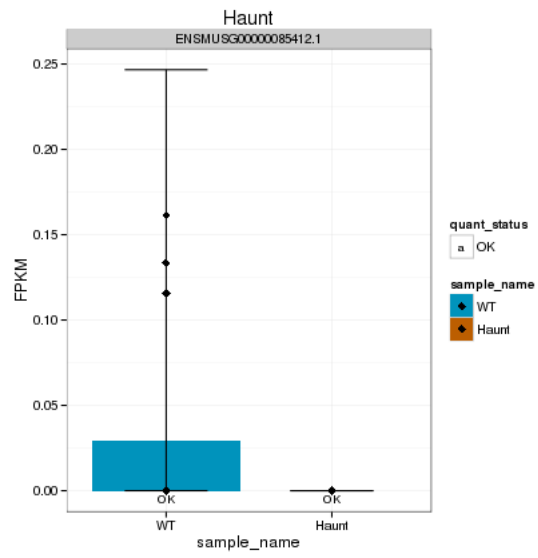

Barplot of isoform expression:

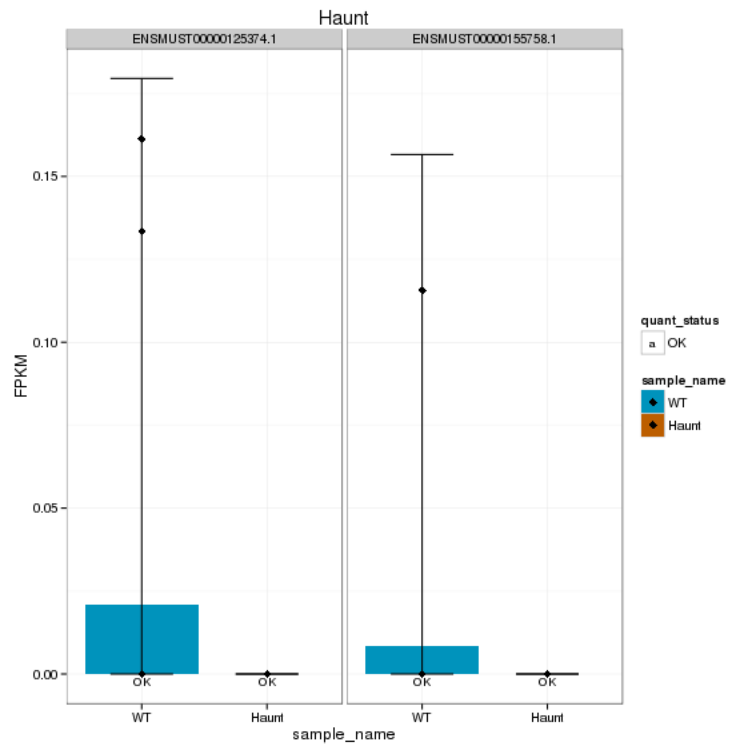

## LacZ expression

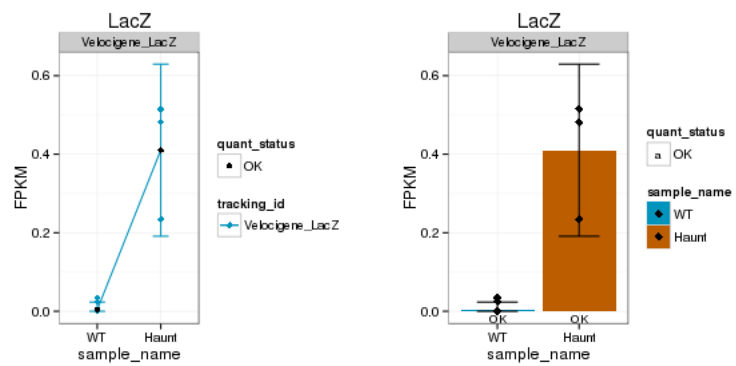

## Digital Genotyping (LacZ vs Endogenous lincRNA and Sex)

Eif2s3y is a y-expressed gene, Xist is an x-expressed gene Expression plot (endogenous linc, lacZ, Y-expressed gene):

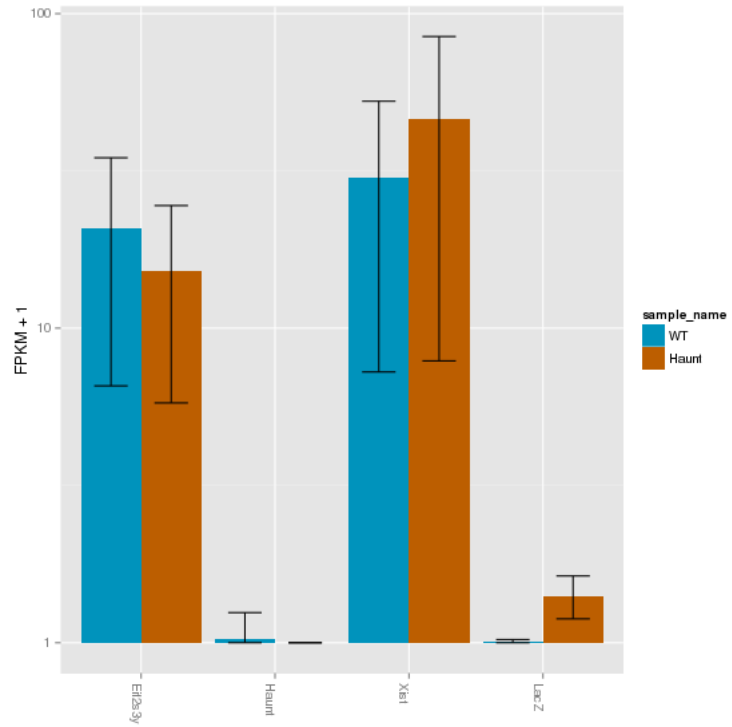

Expression heatmap:

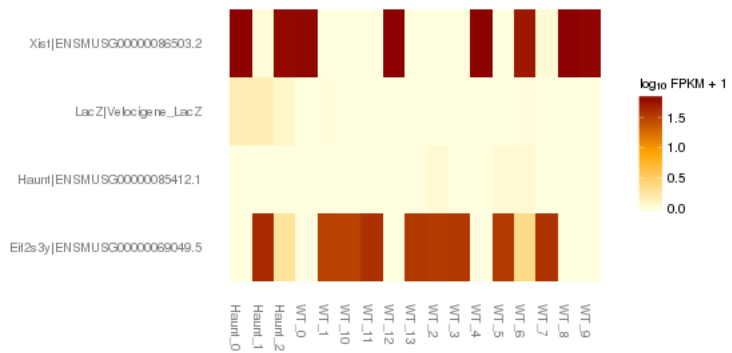

Track visualization

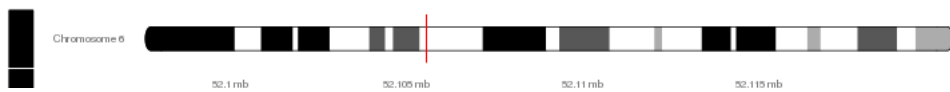

KO Region Hsm1L2 Hsm1L1 Hsm1L0 WT\_15 WT\_12 WT\_11 WT\_10 WT\_9 WT\_8 WT\_7 WT\_6 WT\_5 WT\_4 WT\_3 WT\_2 WT\_1 WT\_0 LncRNA Isoforms

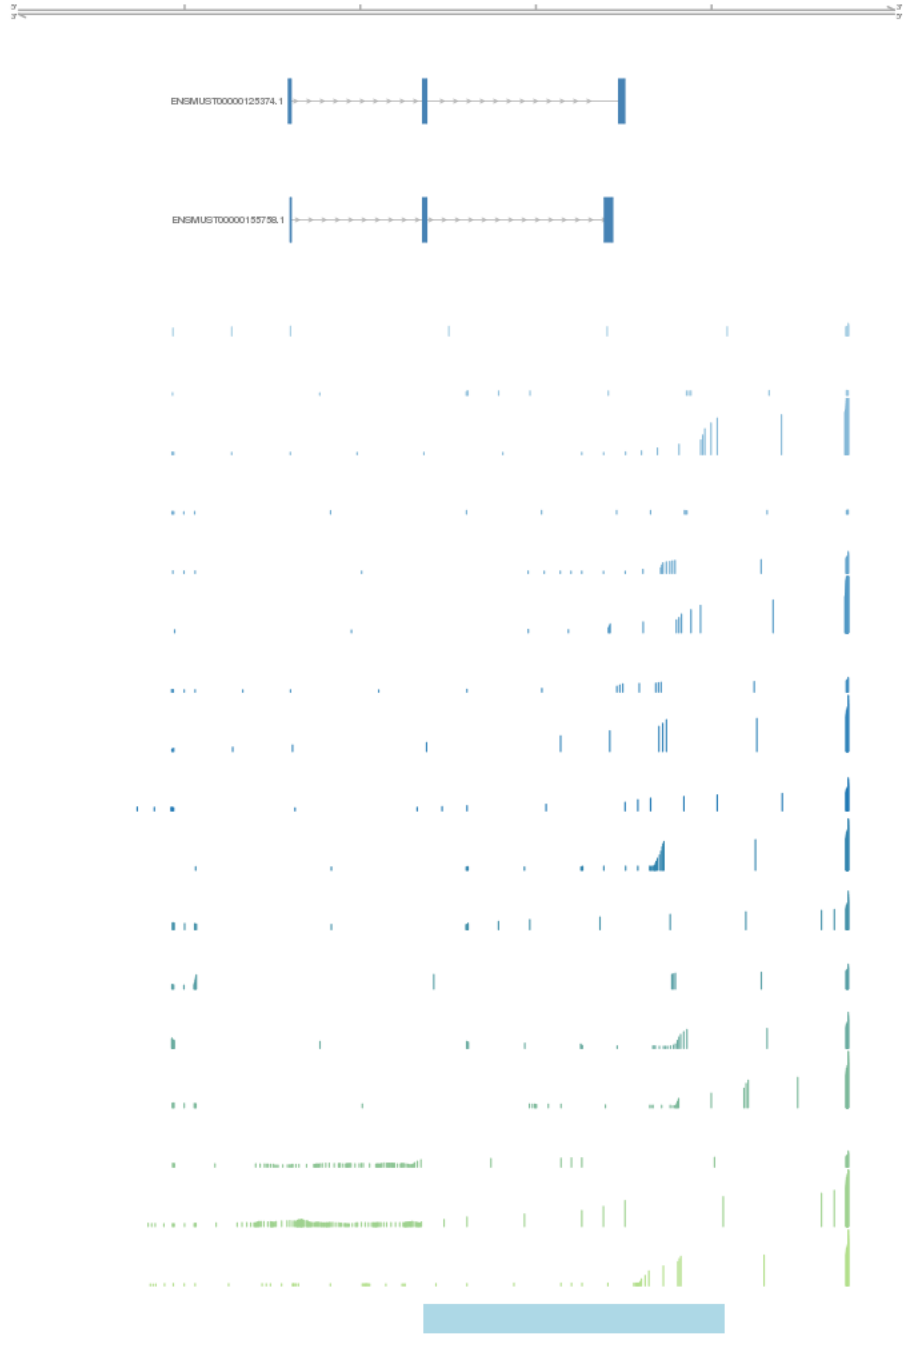



# Differential Analysis

## Differential Genes

There are 37 significantly differentially expressed genes. They are:

```
geneAnnot$gene_short_name
1 Hspa8
2 Ubb
3 Dusp6
4 Pttg1
5 Adi1
6 Serpina3n
7 Fos
8 Arc
9 Nr4a1
10 Glo1
11 Xdh
12 Nr4a3
13 Hddc3
14 Cryab
15 Arhgap27
16 Fam214a
17 Filip1
18 Klf10
19 Egr2
20 Txnip
21 Egr1
22 Akap12
23 Atp5l
24 Maff
25 Gm9493
26 Acp1
27 Npas4
28 Hbb-bs
29 Junb
30 Kdm5d
31 Tpm3-rs7
32 Rpl34
33 Ddx3y
34 Egr4
35 Gm7292
36 AA465934
37 Gm26825
```

# Matrix of gene significant differences between conditions

(skip for Brainmap wt-v-ko comparisons)

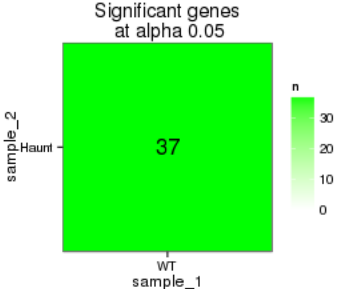

# Significant gene expression differences between conditions

Expression plot (genes):(turned off)

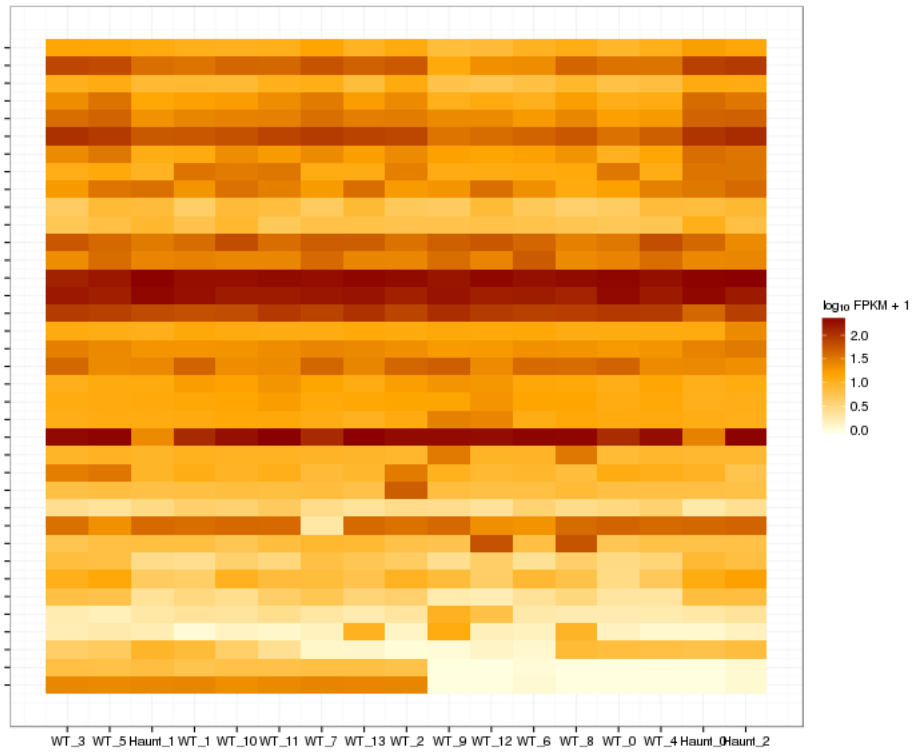

Significant genes with expression >50fpkm (any condition):(turned off)

An individual look at each of the highly expressed significantly differentially regulated genes: (eval=false for first pass)

### Expression-level/significance relationship

Scatter plot of significant genes only:

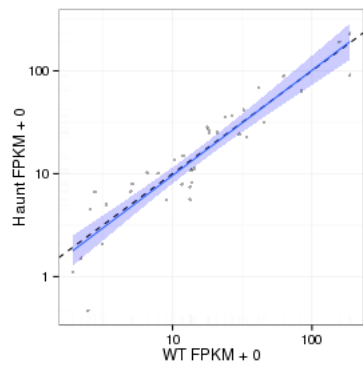

### Volcano Plot

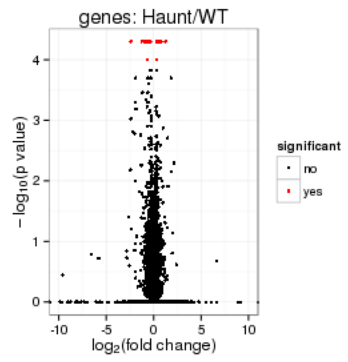

### Volcano plot with significant genes only:

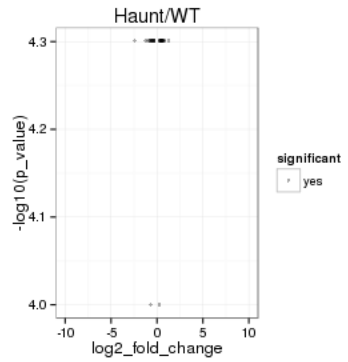

### FoldChange Heatmap

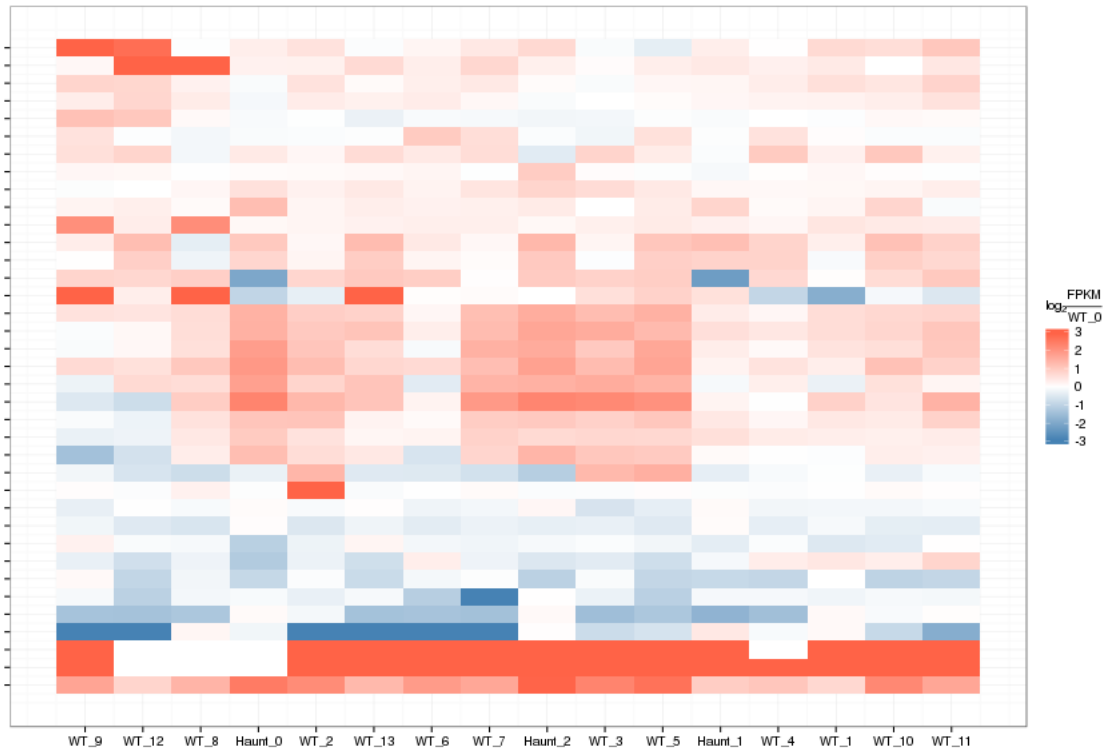

## Differential Splicing

### Differential Isoforms between conditions

Per isoform difference between conditions:

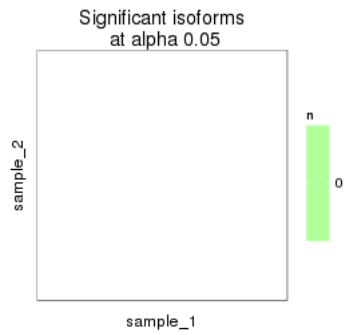

These isoforms are:

[1] "no sig isoforms"

Gene-level DE isoform heatmap

```
## [1] "no sig isoforms"
```

Isoform foldchange heatmap by isoform:

```
## [1] "no sig isoforms"
```

## Differential Splicing between conditions

(eval false for first pass)

Per condition differences in isoforms (Does gene have diff piechart between conditions?)

These genes are:

Splicing heatmap by isoform:

Splicing heatmap by gene

The following are significantly differentially spliced genes (relative portion of isoform per condition):

# Gene/Pathway Analysis

## GSEA

Enrichment and zscores are calculated based on expression in KO vs WT (fpkmKO/fpkmWT), so genes that are down regulated in KO are shown in blue, while upregulation is shown in red.

KO/WT Blue = down in KO Red = Up in KO

Biocarta enrichment:

```
## Error: `x` must have at least 2 rows and 2 columns
```

Biocarta zscore:

```
## Error: incorrect number of dimensions
```

```
## Error: object 'x_ordered' not found
```

```
## Error: error in evaluating the argument 'x' in selecting a method for function 'as.matrix': Error: object 'x_ordered' not found
```

```
## Error: object 'x_ordered' not found
```

Reactome enrichment:

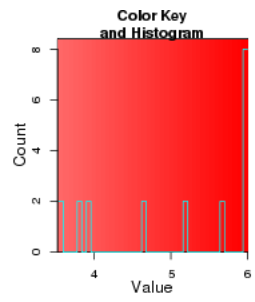

\_\_\_\_\_

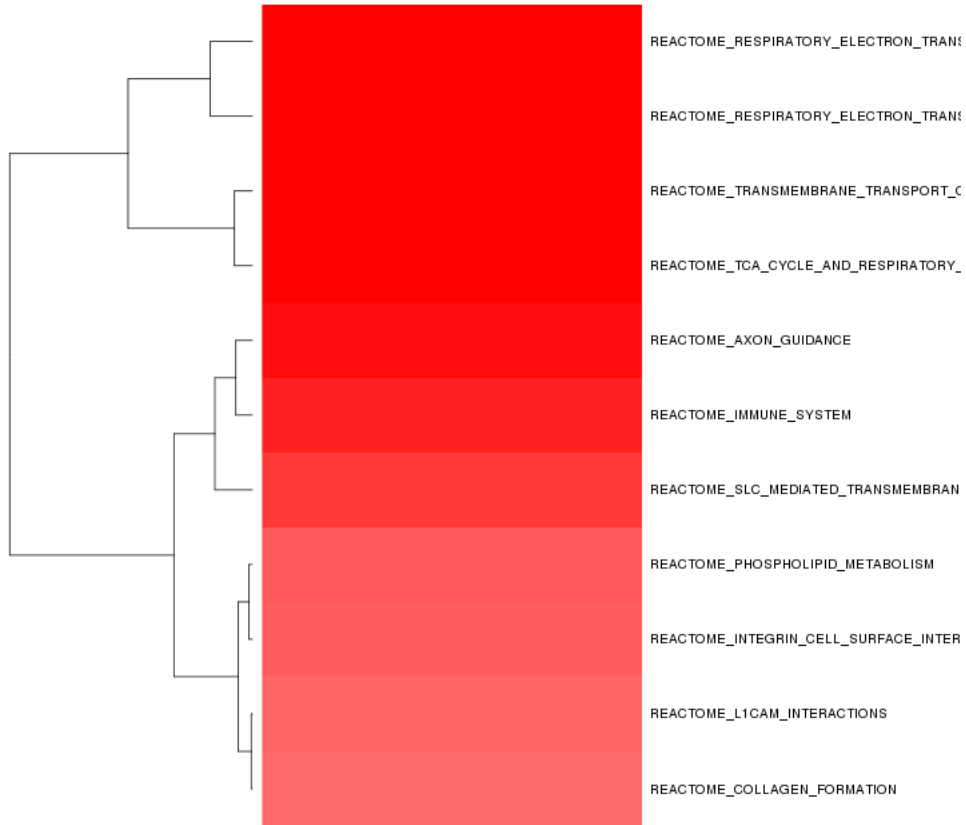

Reactome zscore:

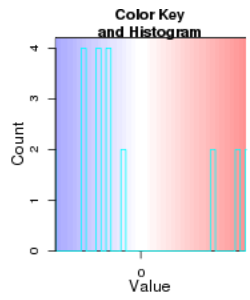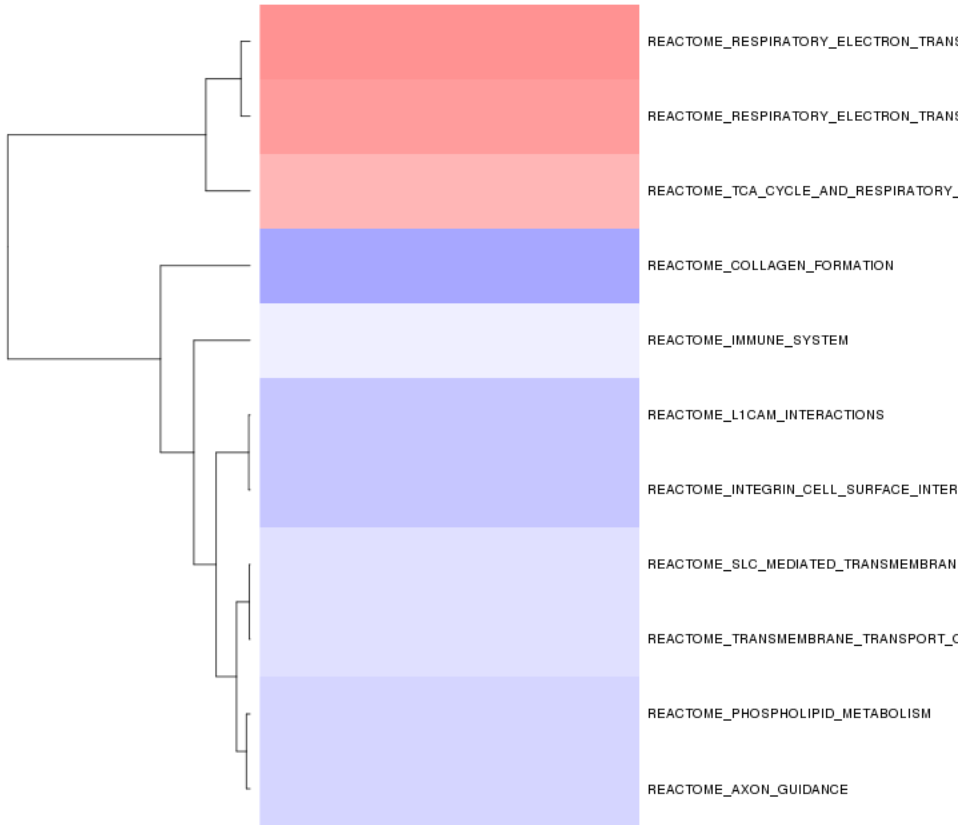

Kegg enrichment:



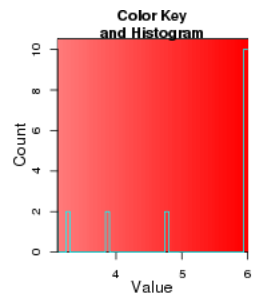

\_\_\_\_\_

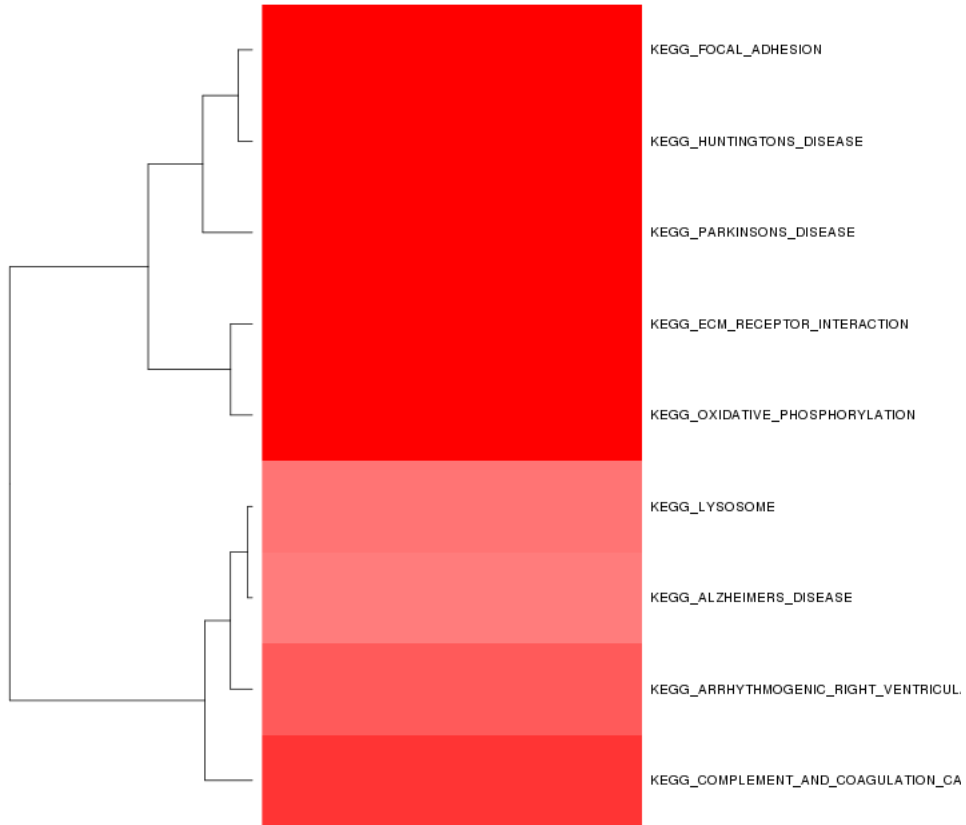

Kegg zscore:

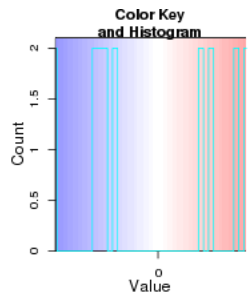

\_\_\_\_\_

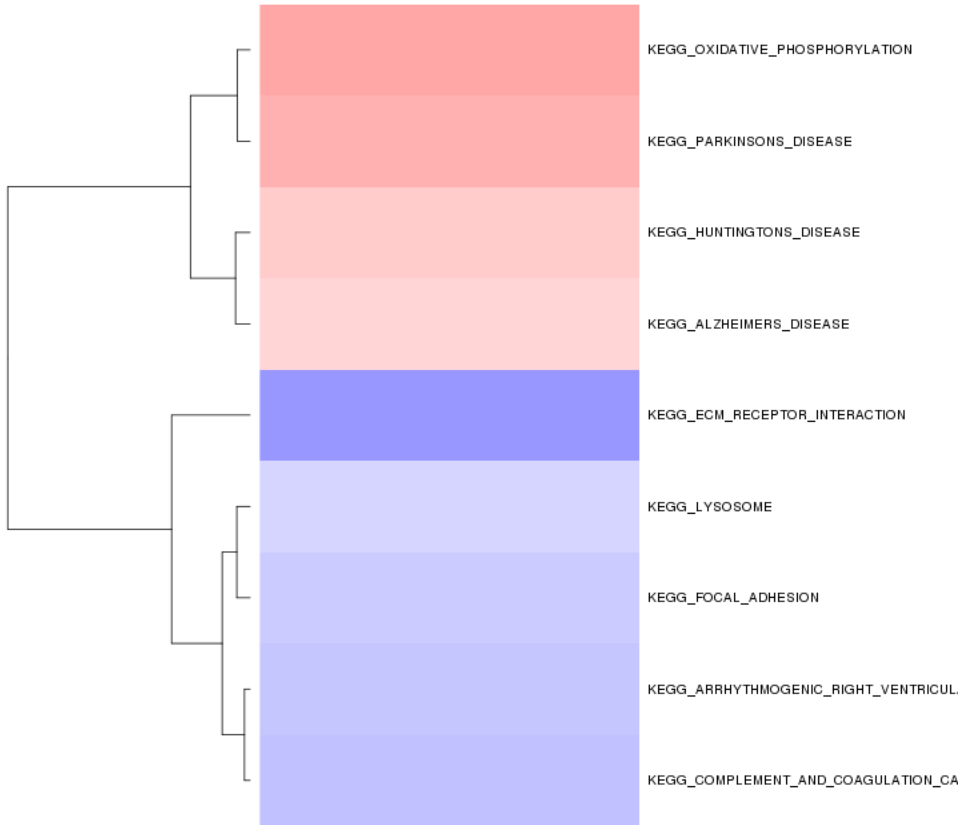

Interneuron enrichment:

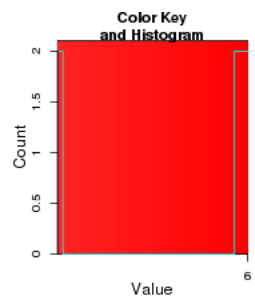

\_\_\_\_\_

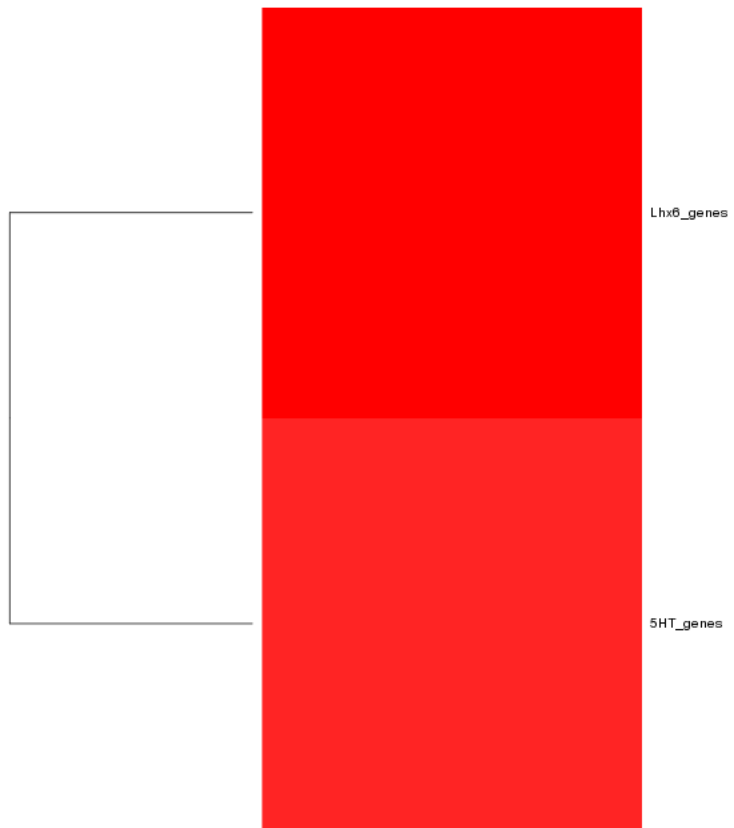

Interneuron zscore:

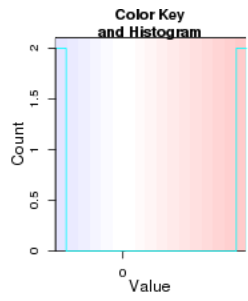

\_\_\_\_\_

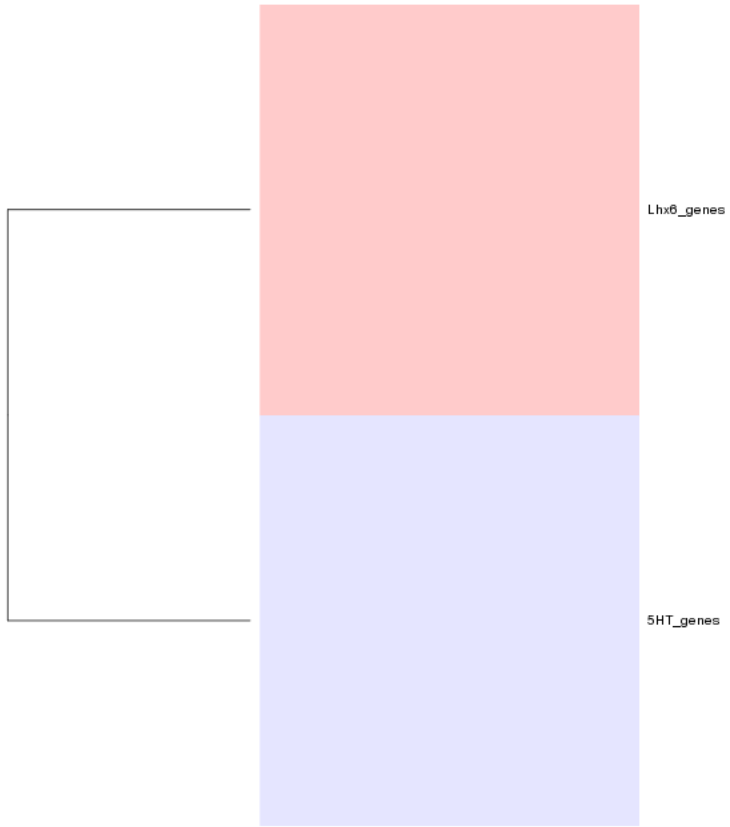

Oncogene enrichment:

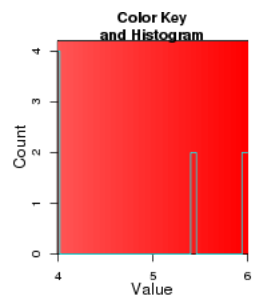

\_\_\_\_\_

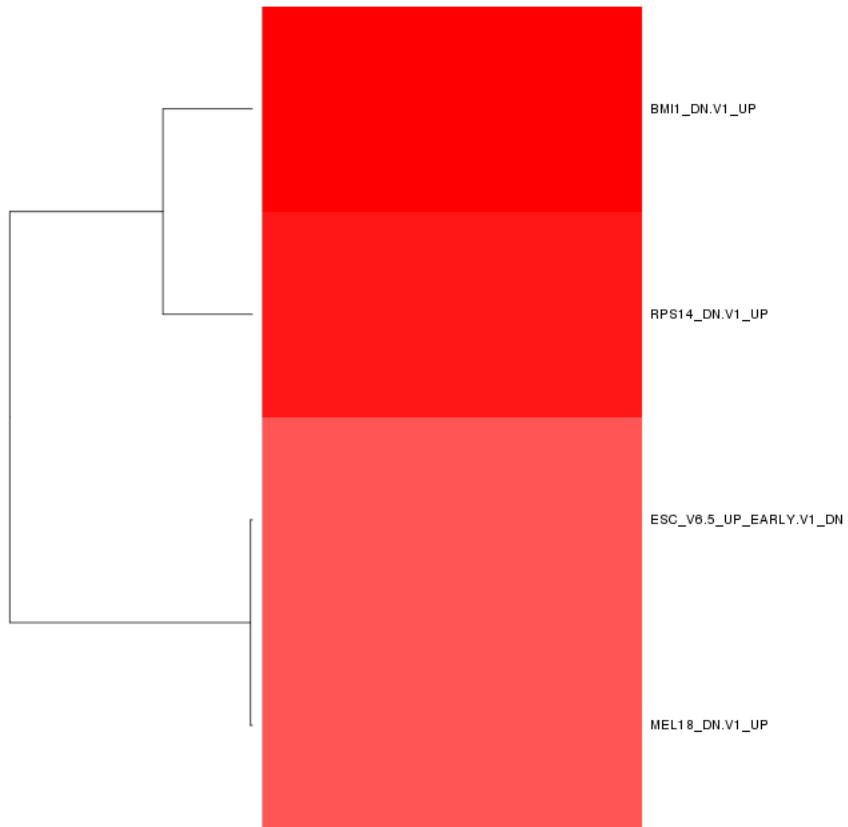

Oncogene zscore:

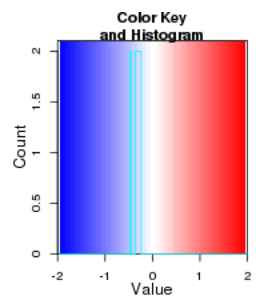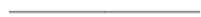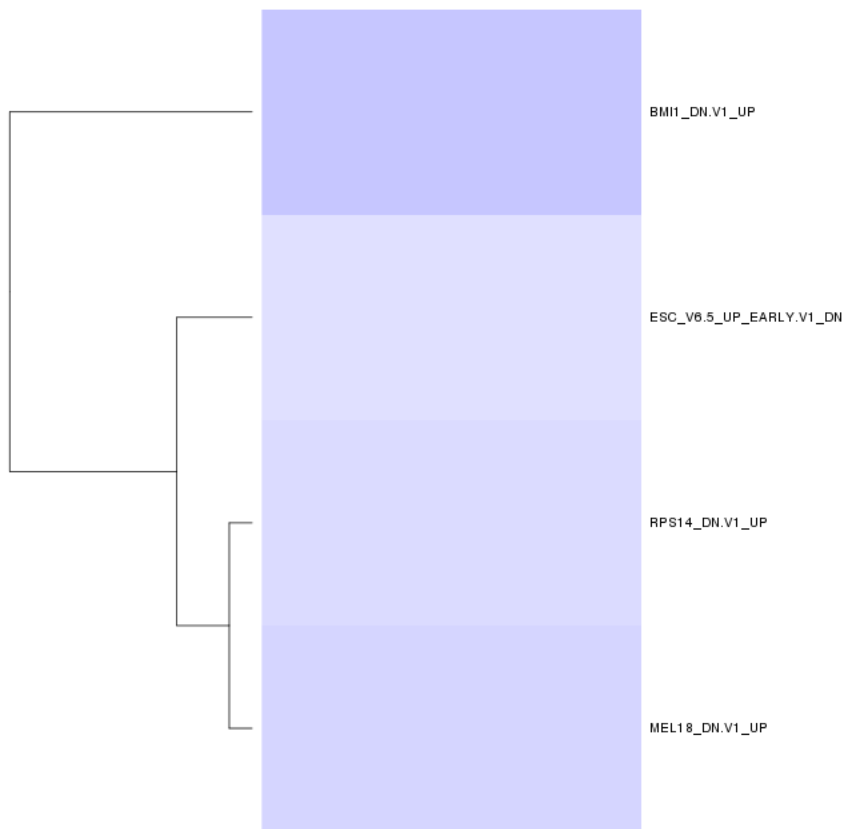

Immuno enrichment:



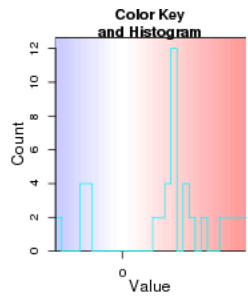

\_\_\_\_\_

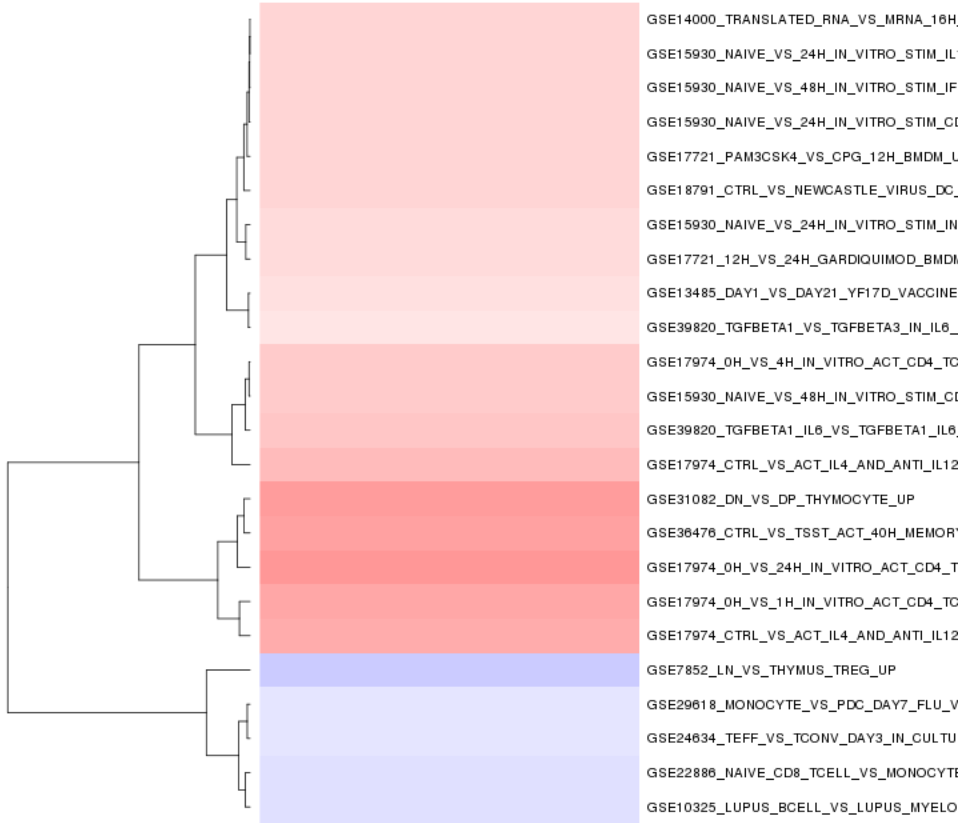

TF enrichment:



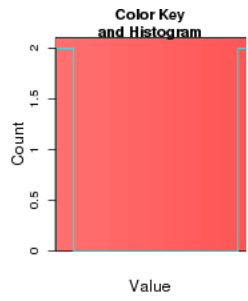

\_\_\_\_\_

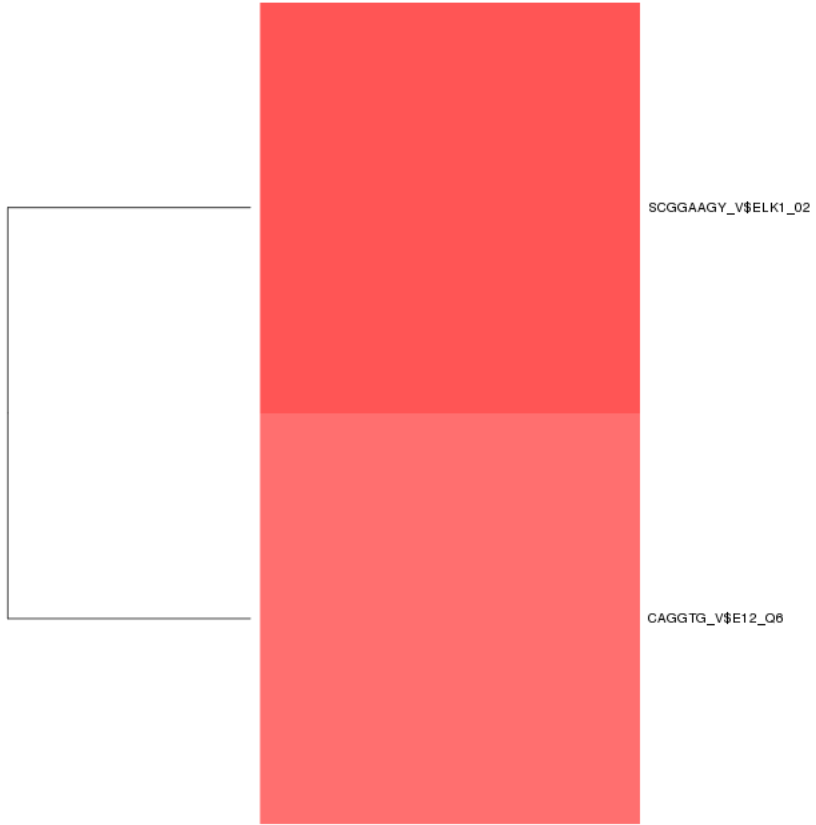

TF zscore:

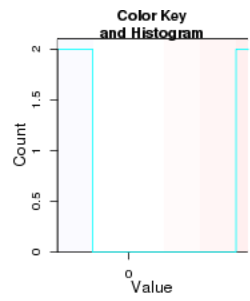

\_\_\_\_\_

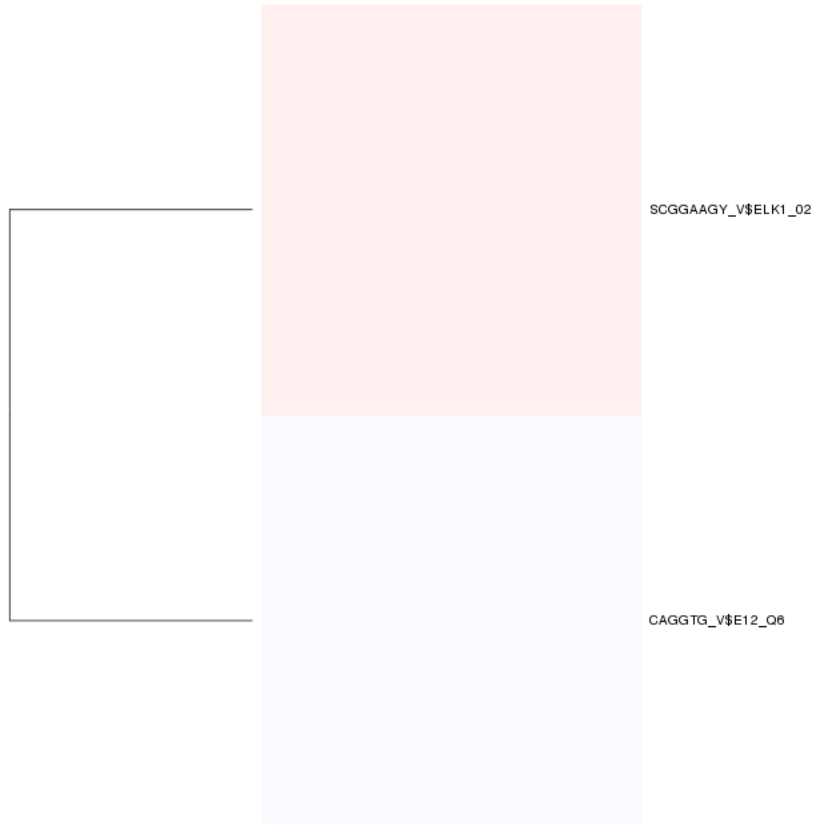

## GO enrichment

Cluster profiler used to call enrichments of significantly differentially regulated genes that map to Entrez IDs.

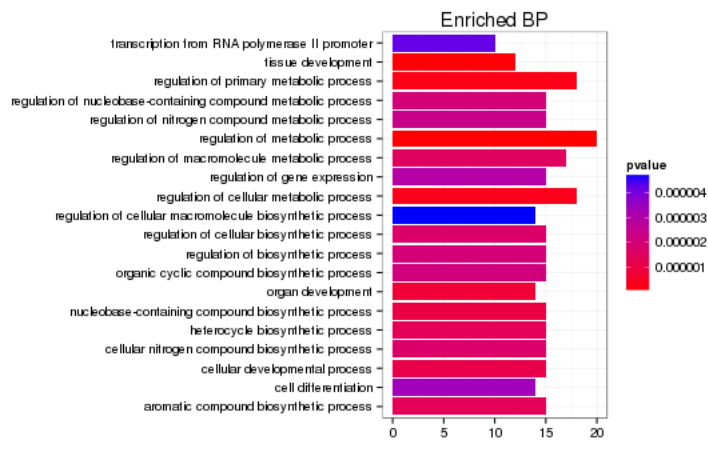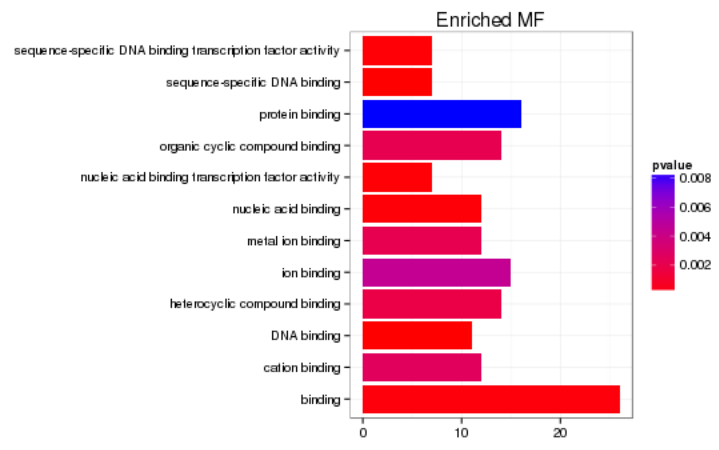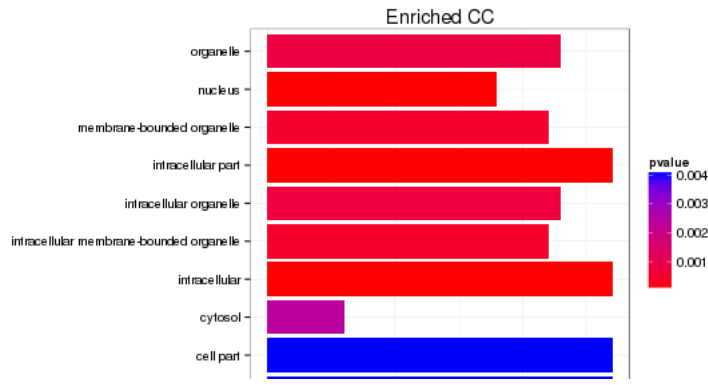

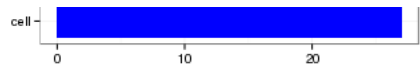

```
## Error: need finite 'xlim' values
```

```
## Error: need finite 'xlim' values
```

## Enrichment or depletion for stage-specific cell cycle markers



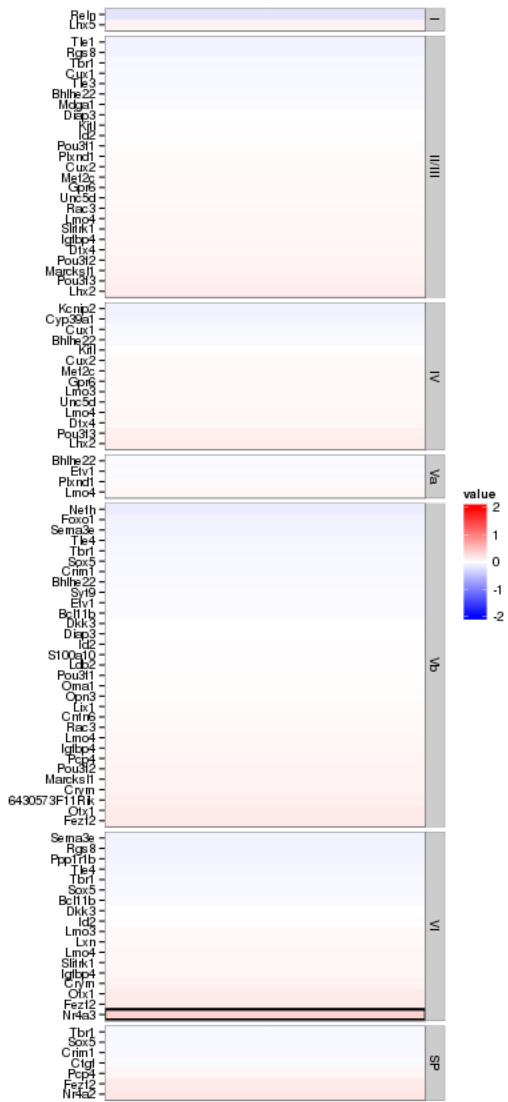

Enrichment or depletion for specific neural cell types

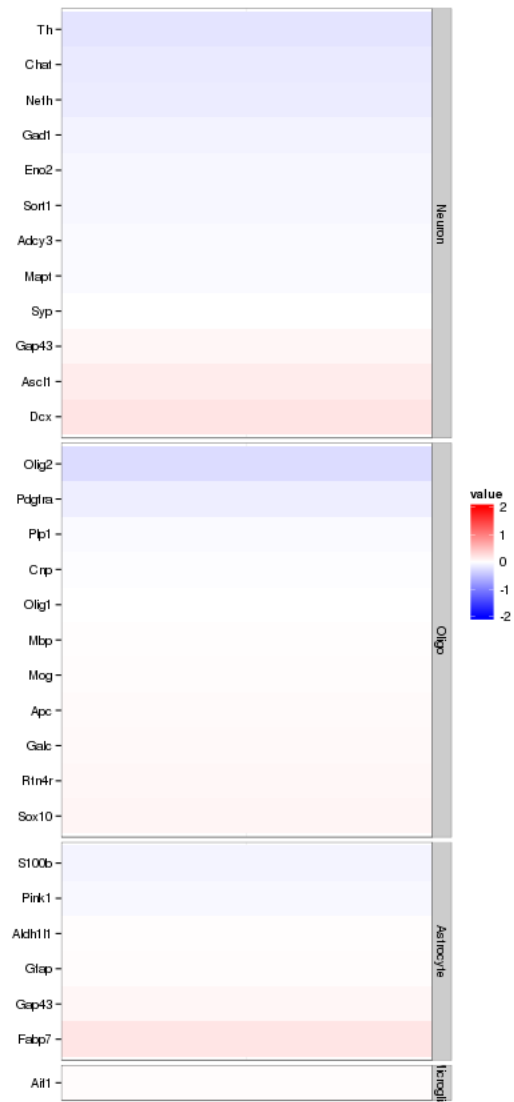

**Enrichment or Depletion of neural differentiation markers**

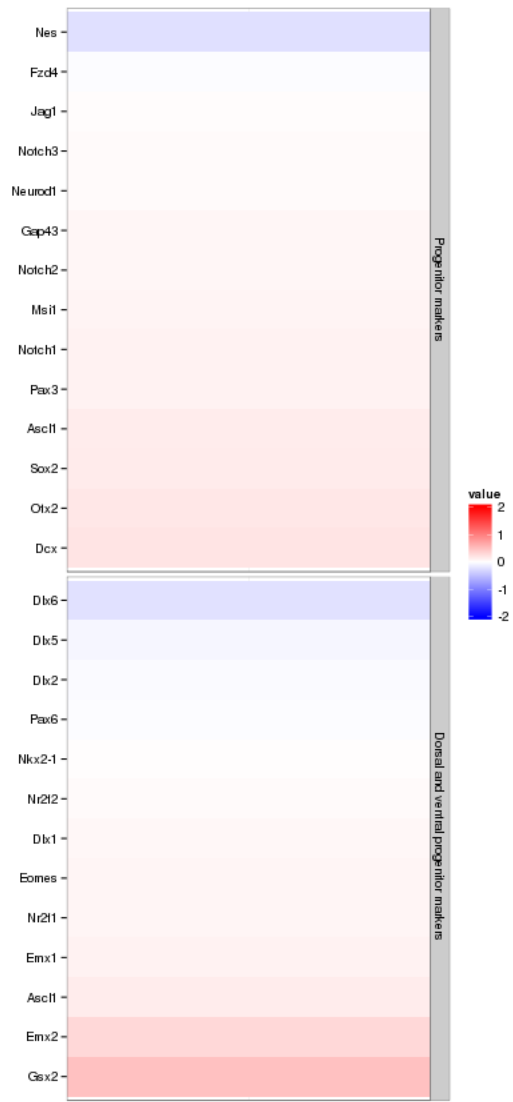

## Cis vs Trans (locally)

log2 Foldchange and test statistic are calculated with the ratio of fpkm(KO)/fpkm(WT), thus the test\_stat is positive if a gene is higher in the KO and negative if a gene has lower expression in the KO

The pvalue for 0 genes significantly regulated in a region this size is: 1



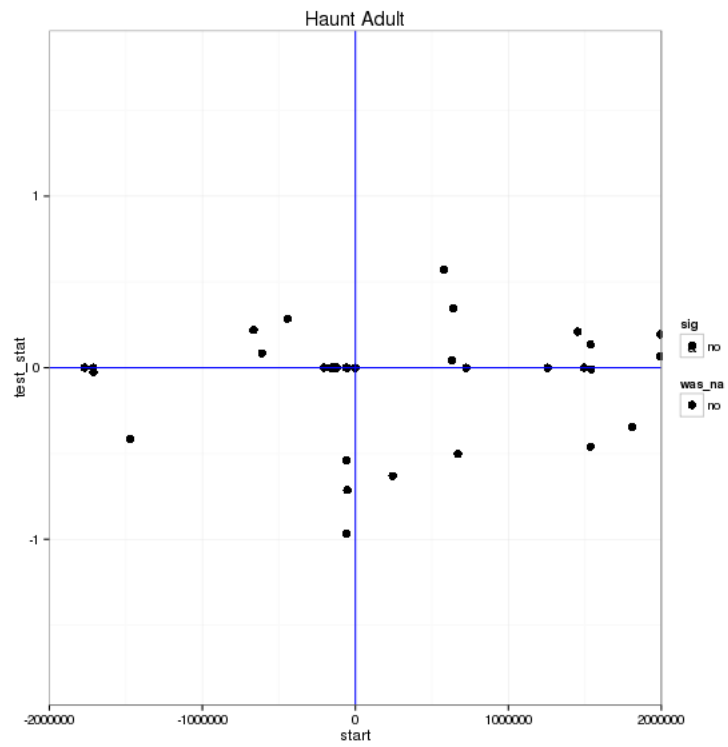

## Notes

Samples used are:

10

- 1 JR729
- 2 JR728
- 3 JR796
- 4 JR797
- 5 JR740
- 6 JR800
- 7 JR827
- 8 JR778
- 9 JR734
- 10 JR802
- 11 JR803
- 12 JR735
- 13 JR785
- 14 JR781

15 JR738  
16 JR782  
17 JR826

## Replicates

| file                                                                          | sample_name | replicate | rep_name | total_mass  | norm_mass   | internal_scale | external_scale |
|-------------------------------------------------------------------------------|-------------|-----------|----------|-------------|-------------|----------------|----------------|
| 1 /n/rinn_data1/seq/igoff/Projects/BrainMap/data/quants/JR729/abundances.cxb  | WT          | 0         | WT_0     | 26334400.00 | 34083500.00 | 0.77           | 1.00           |
| 2 /n/rinn_data1/seq/igoff/Projects/BrainMap/data/quants/JR728/abundances.cxb  | WT          | 1         | WT_1     | 20329200.00 | 34083500.00 | 0.59           | 1.00           |
| 3 /n/rinn_data1/seq/igoff/Projects/BrainMap/data/quants/JR796/abundances.cxb  | WT          | 2         | WT_2     | 34089000.00 | 34083500.00 | 1.00           | 1.00           |
| 4 /n/rinn_data1/seq/igoff/Projects/BrainMap/data/quants/JR797/abundances.cxb  | WT          | 3         | WT_3     | 28103300.00 | 34083500.00 | 0.81           | 1.00           |
| 5 /n/rinn_data1/seq/igoff/Projects/BrainMap/data/quants/JR740/abundances.cxb  | WT          | 4         | WT_4     | 35808200.00 | 34083500.00 | 1.05           | 1.00           |
| 6 /n/rinn_data1/seq/igoff/Projects/BrainMap/data/quants/JR800/abundances.cxb  | WT          | 5         | WT_5     | 37012200.00 | 34083500.00 | 1.09           | 1.00           |
| 7 /n/rinn_data1/seq/igoff/Projects/BrainMap/data/quants/JR827/abundances.cxb  | WT          | 6         | WT_6     | 27786600.00 | 34083500.00 | 0.82           | 1.00           |
| 8 /n/rinn_data1/seq/igoff/Projects/BrainMap/data/quants/JR778/abundances.cxb  | WT          | 7         | WT_7     | 39541900.00 | 34083500.00 | 1.17           | 1.00           |
| 9 /n/rinn_data1/seq/igoff/Projects/BrainMap/data/quants/JR734/abundances.cxb  | WT          | 8         | WT_8     | 34480600.00 | 34083500.00 | 1.03           | 1.00           |
| 10 /n/rinn_data1/seq/igoff/Projects/BrainMap/data/quants/JR802/abundances.cxb | WT          | 9         | WT_9     | 45467400.00 | 34083500.00 | 1.32           | 1.00           |
| 11 /n/rinn_data1/seq/igoff/Projects/BrainMap/data/quants/JR803/abundances.cxb | WT          | 10        | WT_10    | 52130400.00 | 34083500.00 | 1.53           | 1.00           |
| 12 /n/rinn_data1/seq/igoff/Projects/BrainMap/data/quants/JR735/abundances.cxb | WT          | 11        | WT_11    | 34994400.00 | 34083500.00 | 1.03           | 1.00           |
| 13 /n/rinn_data1/seq/igoff/Projects/BrainMap/data/quants/JR785/abundances.cxb | WT          | 12        | WT_12    | 34173600.00 | 34083500.00 | 0.99           | 1.00           |
| 14 /n/rinn_data1/seq/igoff/Projects/BrainMap/data/quants/JR781/abundances.cxb | WT          | 13        | WT_13    | 41538900.00 | 34083500.00 | 1.22           | 1.00           |
| 15 /n/rinn_data1/seq/igoff/Projects/BrainMap/data/quants/JR738/abundances.cxb | Haunt       | 0         | Haunt_0  | 26084100.00 | 34083500.00 | 0.77           | 1.00           |
| 16 /n/rinn_data1/seq/igoff/Projects/BrainMap/data/quants/JR782/abundances.cxb | Haunt       | 1         | Haunt_1  | 43523200.00 | 34083500.00 | 1.28           | 1.00           |
| 17 /n/rinn_data1/seq/igoff/Projects/BrainMap/data/quants/JR826/abundances.cxb | Haunt       | 2         | Haunt_2  | 33775800.00 | 34083500.00 | 0.99           | 1.00           |

## Session Info

```
## R version 3.0.2 (2013-09-25)
## Platform: x86_64-unknown-linux-gnu (64-bit)
##
## locale:
## [1] LC_CTYPE=en_US.UTF-8      LC_NUMERIC=C
## [3] LC_TIME=en_US.UTF-8      LC_COLLATE=en_US.UTF-8
## [5] LC_MONETARY=en_US.UTF-8  LC_MESSAGES=en_US.UTF-8
## [7] LC_PAPER=en_US.UTF-8     LC_NAME=C
## [9] LC_ADDRESS=C             LC_TELEPHONE=C
## [11] LC_MEASUREMENT=en_US.UTF-8 LC_IDENTIFICATION=C
##
## attached base packages:
## [1] grid      parallel  methods  stats    graphics grDevices utils
## [8] datasets base
##
## other attached packages:
## [1] plyr_1.8.1
## [2] stringr_0.6.2
## [3] seqbias_1.10.0
```

```

## [4] BSgenome.Mmusculus.UCSC.mm10_1.3.19
## [5] BSgenome_1.30.0
## [6] Biostrings_2.30.1
## [7] gdata_2.13.3
## [8] GO.db_2.10.1
## [9] org.Mm.eg.db_2.10.1
## [10] clusterProfiler_1.13.1
## [11] DOSE_2.0.0
## [12] ReactomePA_1.6.1
## [13] AnnotationDbi_1.24.0
## [14] Biobase_2.22.0
## [15] mgcv_1.7-29
## [16] nlme_3.1-117
## [17] RMySQL_0.9-3
## [18] RColorBrewer_1.0-5
## [19] gridExtra_0.9.1
## [20] gtable_0.1.2
## [21] marray_1.40.0
## [22] gplots_2.13.0
## [23] GSA_1.03
## [24] limma_3.18.13
## [25] xtable_1.7-3
## [26] cummeRbund_2.7.2
## [27] Gviz_1.6.0
## [28] rtracklayer_1.22.7
## [29] GenomicRanges_1.14.4
## [30] XVector_0.2.0
## [31] IRanges_1.20.7
## [32] fastcluster_1.1.13
## [33] reshape2_1.4
## [34] ggplot2_1.0.0
## [35] RSQLite_0.11.4
## [36] DBI_0.2-7
## [37] BiocGenerics_0.8.0
## [38] knitr_1.6
##
## loaded via a namespace (and not attached):
## [1] biomaRt_2.18.0      biovizBase_1.10.8   bitops_1.0-6
## [4] caTools_1.17        cluster_1.15.2      colorspace_1.2-4
## [7] dichromat_2.0-0     digest_0.6.4        DO.db_2.7
## [10] evaluate_0.5.5      formatR_0.10        Formula_1.1-1
## [13] GenomicFeatures_1.14.5 GOsemSim_1.20.3     graph_1.40.1
## [16] graphite_1.8.1      gtools_3.4.1        Hmisc_3.14-4
## [19] igraph_0.7.1        KEGG.db_2.10.1     KernSmooth_2.23-12
## [22] labeling_0.2        lattice_0.20-29     latticeExtra_0.6-26
## [25] MASS_7.3-33         Matrix_1.1-3        munsell_0.4.2
## [28] org.Hs.eg.db_2.10.1 proto_0.3-10        qvalue_1.36.0
## [31] Rcpp_0.11.2         RCurl_1.95-4.1     reactome.db_1.46.1
## [34] Rsamtools_1.14.3    scales_0.2.4        splines_3.0.2
## [37] stats4_3.0.2        survival_2.37-7     tcltk_3.0.2
## [40] tools_3.0.2         XML_3.98-1.1       zlibbioc_1.8.0

```

## Run Info

```
##          param
## 1      cmd_line
## 2          version
## 3  SVN_revision
## 4  boost_version
## 5          genome
##
## 1 cuffdiff -p 10 -L WT,Haunt -o /n/rinn_data1/seq/lgoff/Projects/BrainMap/data/diffs/Haunt_vs_WT_Adult /n/rinn_data1/seq/lgoff/Projects/BrainMap/data/ar
## 2
## 3
## 4
## 5
```

# Haunt KO vs WT (Embryonic)

This file shows the wt-v-ko comparison for Haunt.

Cuff overview:

```
## CuffSet instance with:  
## 2 samples  
## 26754 genes  
## 77524 isoforms  
## 0 TSS  
## 23066 CDS  
## 0 promoters  
## 0 splicing  
## 19954 relCDS
```

## QC

### Dispersion

Dispersion plot for genes in cuff: (Overdispersion can lead to innacurate quants)

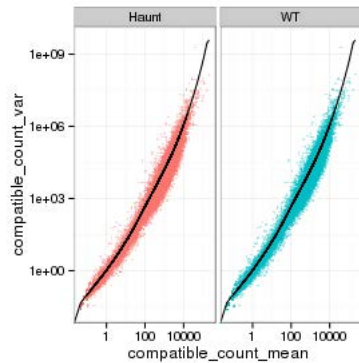

### Cross-replicate variability (fpkmSCVplot)

Differences in CV 2 can result in lower numbers of differentially expressed genes due to a higher degree of variability between replicate fpkm estimates.

Genes:

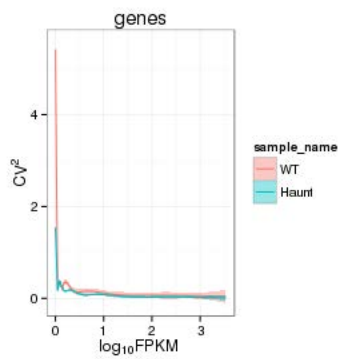

Isoforms:

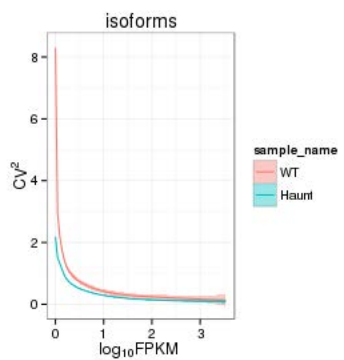

## MvA plot

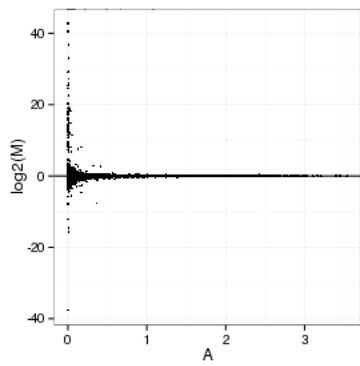

MvA plot counts

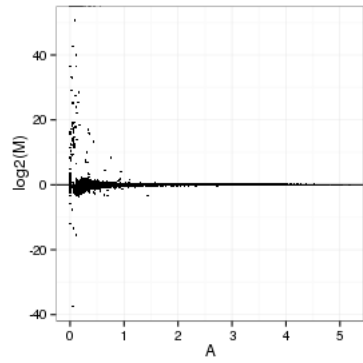

## Scatterplot matrix

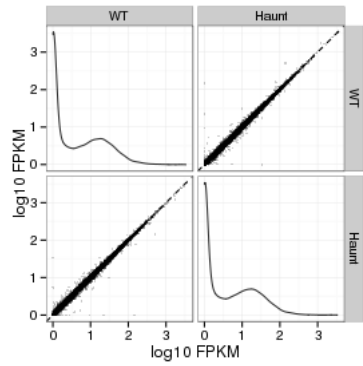

## Distributions

### Boxplots

Boxplot (genes)

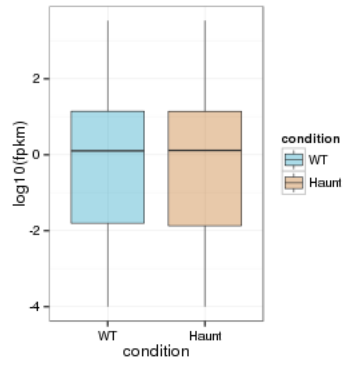

Boxplot (genes, replicates)

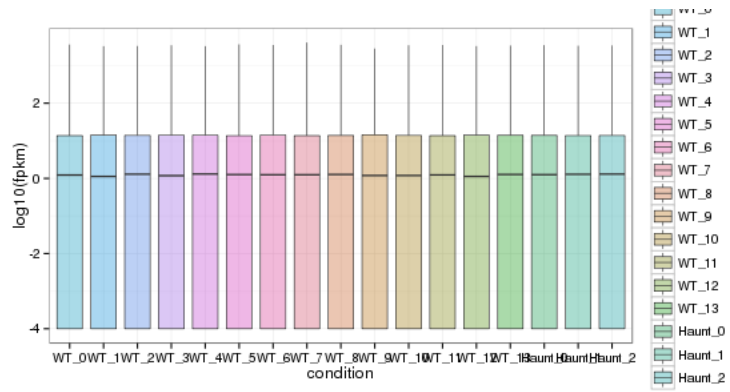

Boxplot (isoforms)

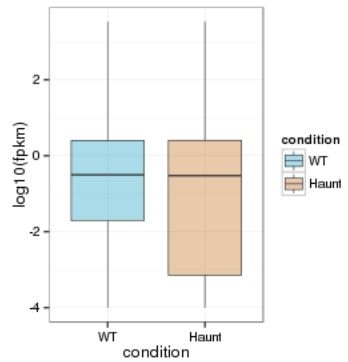

Boxplot (isoforms, replicates)



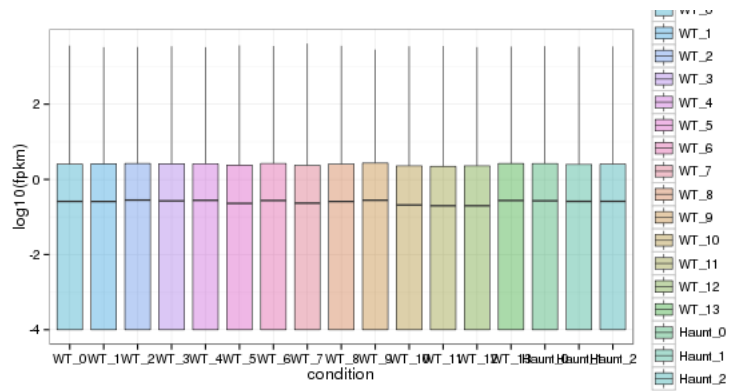

## Density

Density (genes)

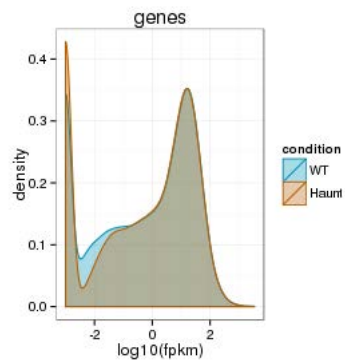

Density (genes, replicates)

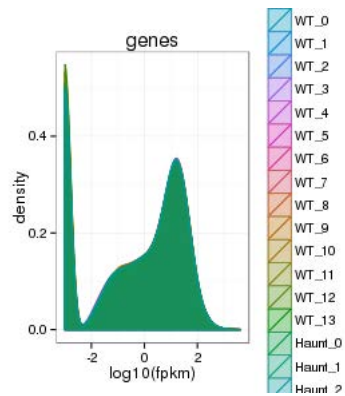

# Clustering

## Replicate Clusters

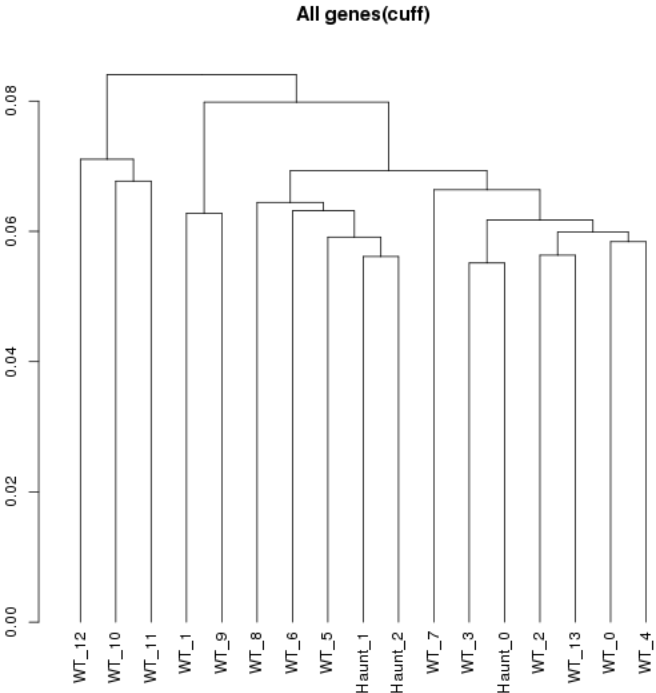

## NULL

## PCA (genes)

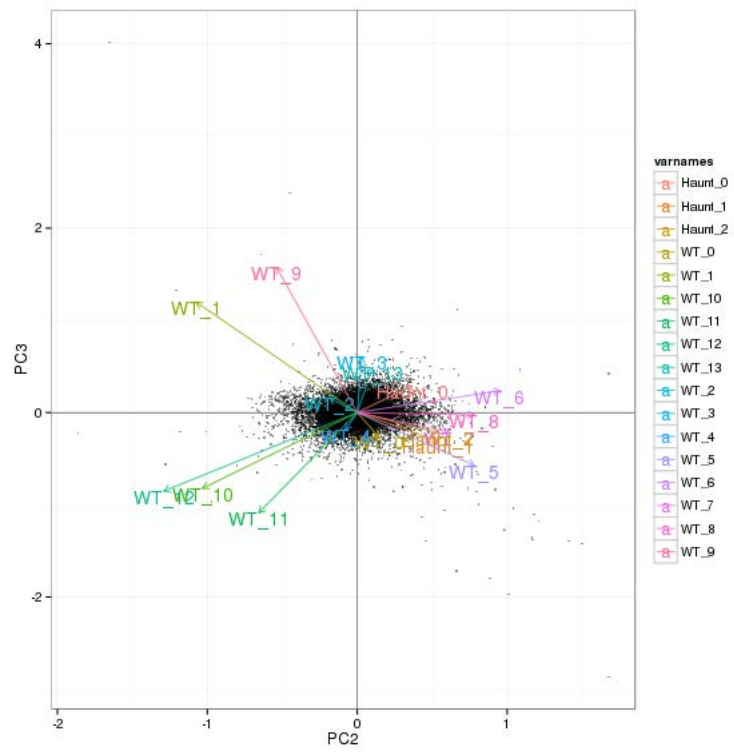

**MDS (genes)**

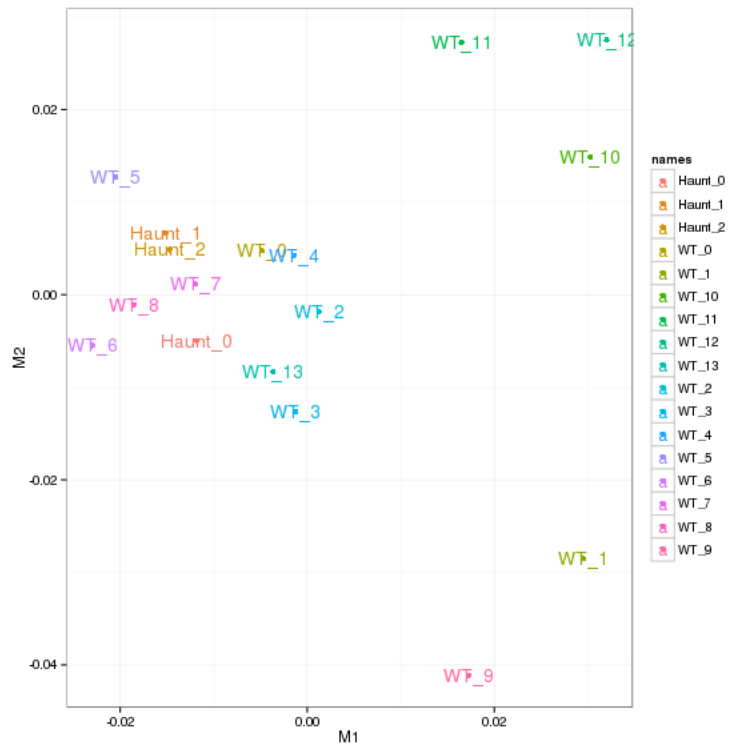

## KO assessment

Endogenous lncRNA expression

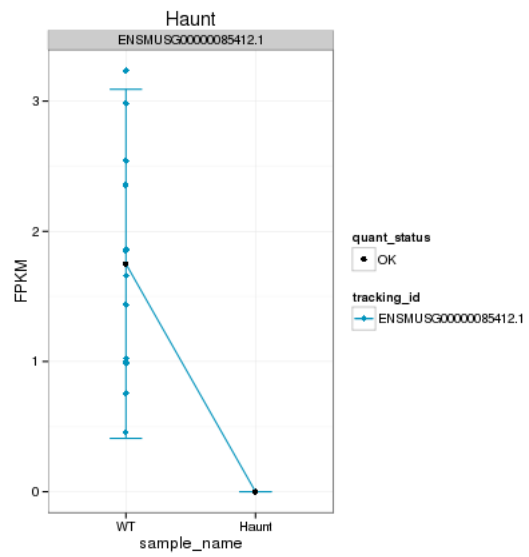

Endogenous expression of Haunt isoforms:

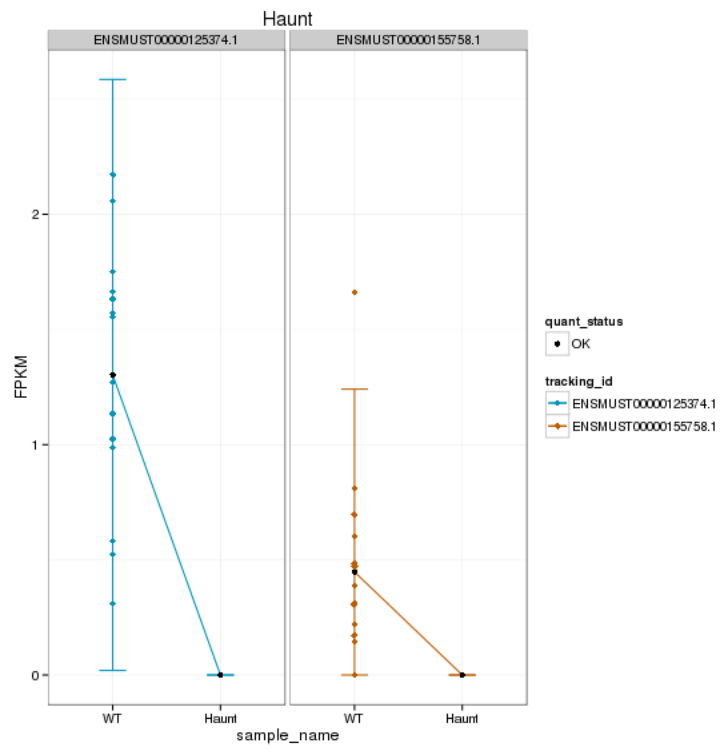

Barplot of gene expression:

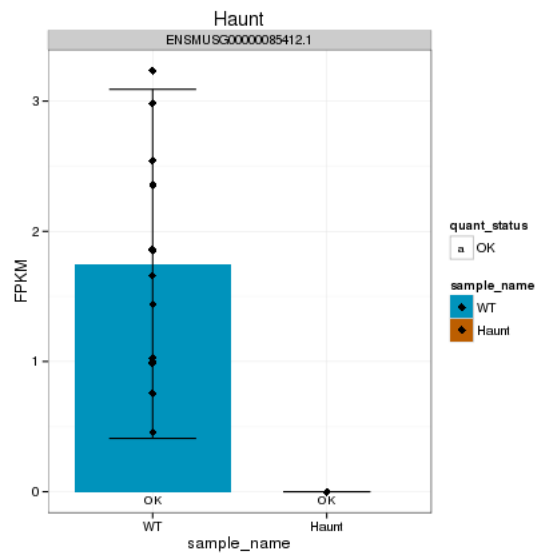

Barplot of isoform expression:

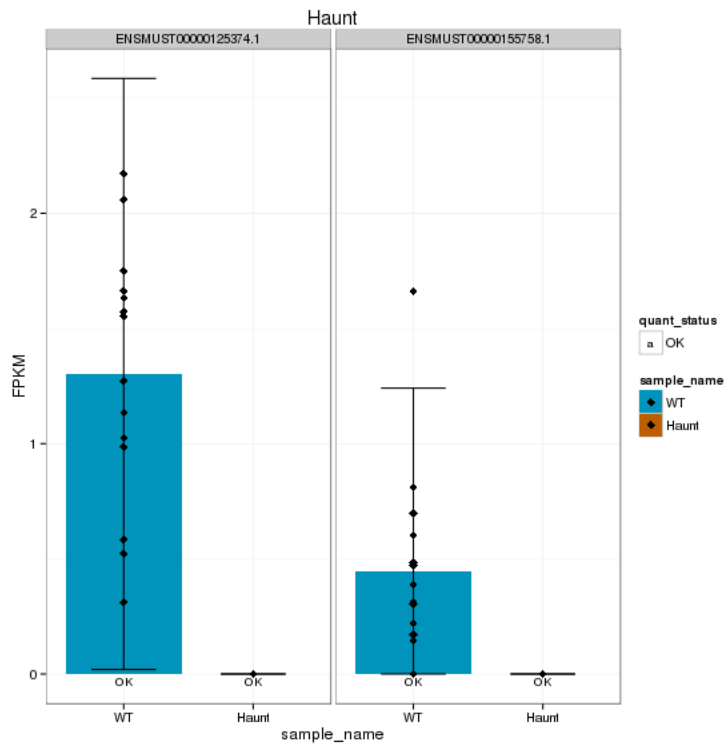

## LacZ expression

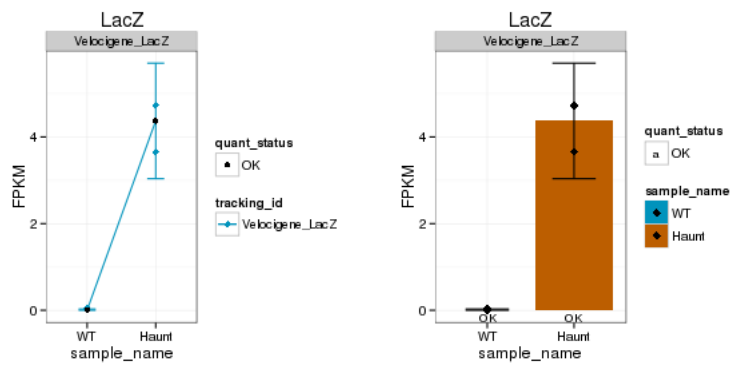

## Digital Genotyping (LacZ vs Endogenous lincRNA and Sex)

Eif2s3y is a y-expressed gene, Xist is an x-expressed gene Expression plot (endogenous linc, lacZ, Y-expressed gene):



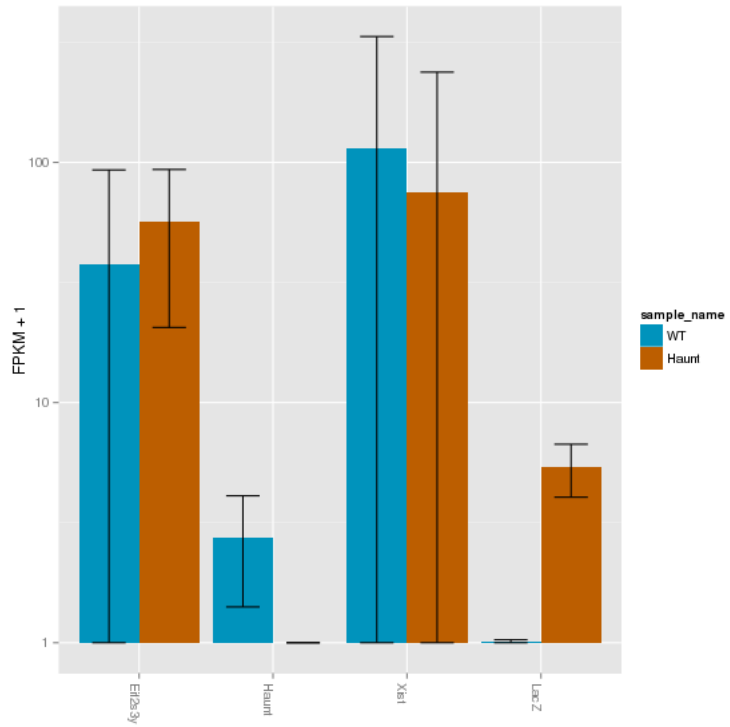

Expression heatmap:

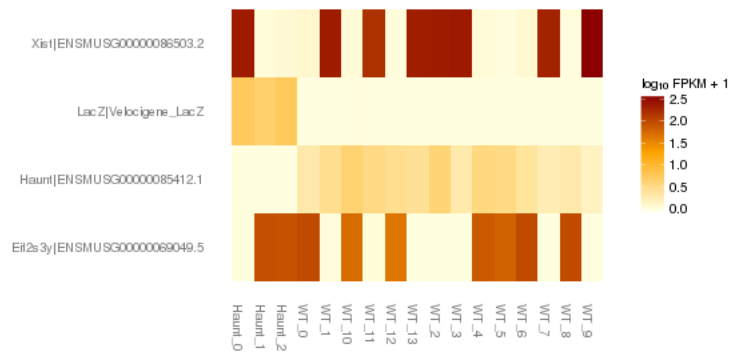

Track visualization

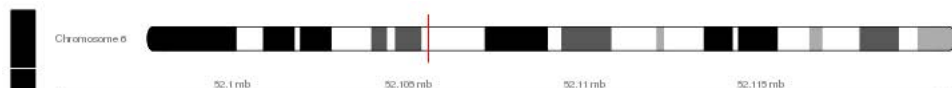

KO Region HsmU1 HsmU2 HsmU3 HsmU4 HsmU5 HsmU6 HsmU7 HsmU8 HsmU9 HsmU10 HsmU11 HsmU12 HsmU13 HsmU0 WT\_0 WT\_1 WT\_2 WT\_3 WT\_4 WT\_5 WT\_6 WT\_7 WT\_8 WT\_9 WT\_10 WT\_11 WT\_12 WT\_13

LncRNA isoforms

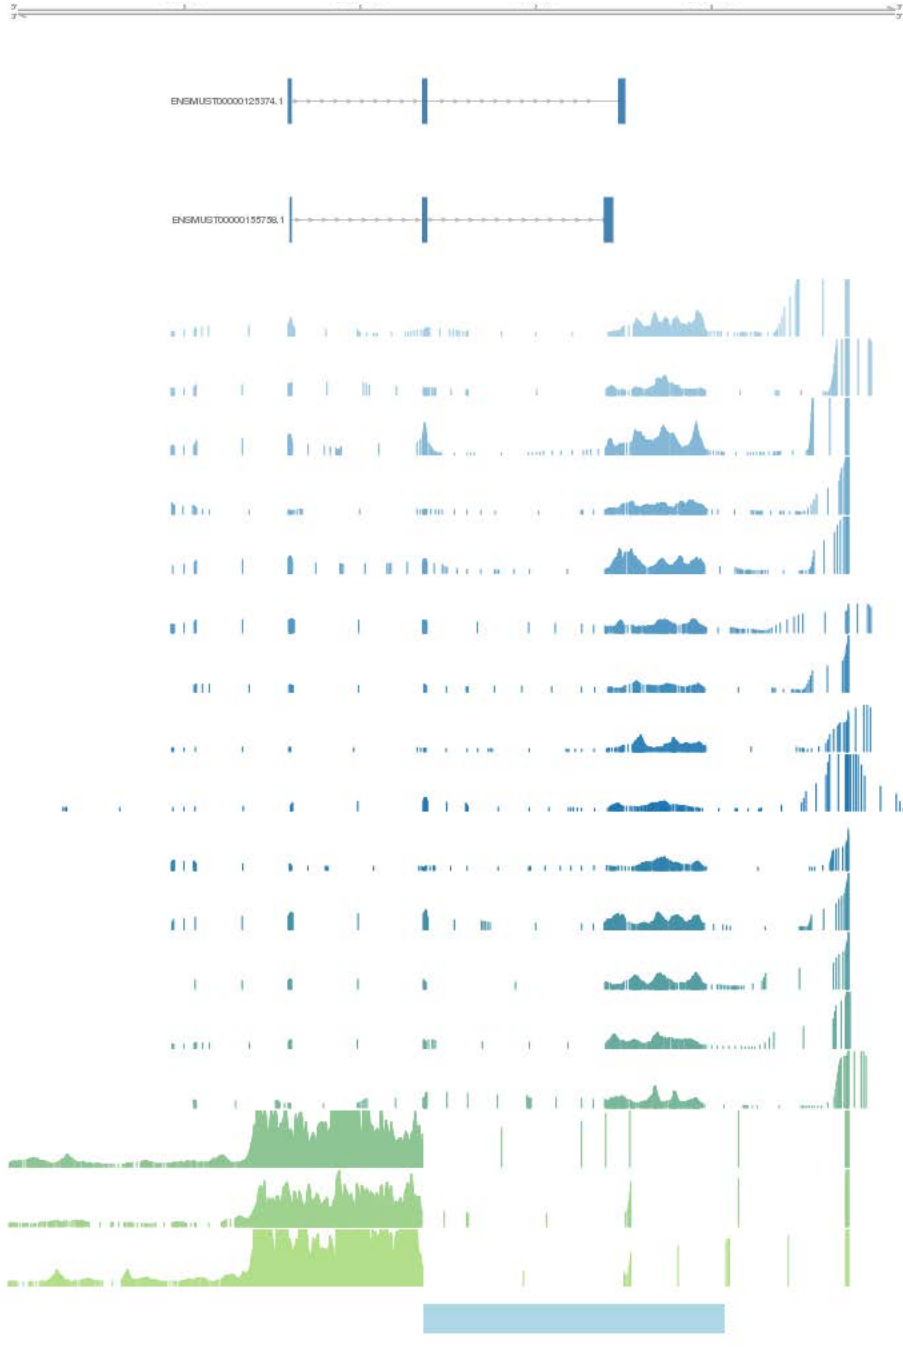

# Differential Analysis

## Differential Genes

There are 33 significantly differentially expressed genes. They are:

```
geneAnnot$gene_short_name
1 Nkx2-1
2 Rplp1
3 Hspa8
4 Tshz3
5 Dlx2
6 Clec3b
7 Lhx6
8 Hsd3b6
9 Dlx5
10 Dera
11 Hddc3
12 Mki67
13 Chma3
14 Cbl
15 Arx
16 Aox4
17 Pcsk1n
18 Dnah7b
19 Tuba1c
20 Rpl29
21 Creg2
22 Hbb-y
23 Hbb-bh1
24 Rnf26
25 Aldh1a1
26 Vsnl1
27 Hba-x
28 Sox11
29 Gm5089
30 Ddx3y
31 Gm9008
32 Haunt
33 Lhx8
```

### Matrix of gene significant differences between conditions

(skip for Brainmap wt-v-ko comparisons)

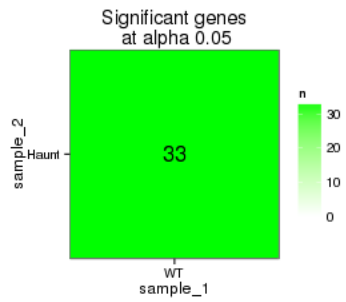

## Significant gene expression differences between conditions

Expression plot (genes):(turned off)

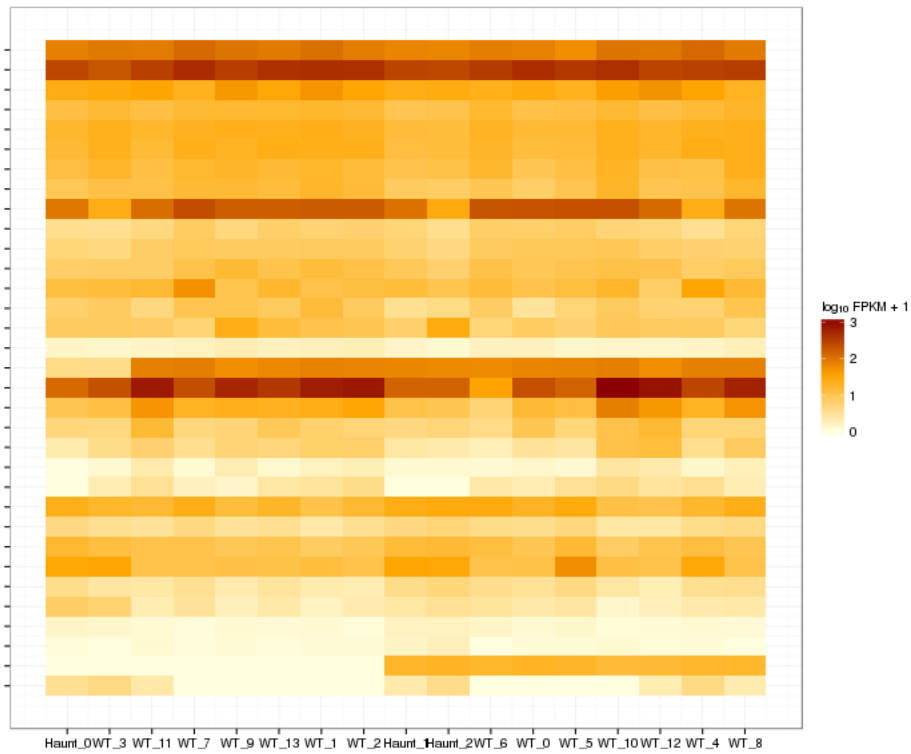

Significant genes with expression >50fpkm (any condition):(turned off)

An individual look at each of the highly expressed significantly differentially regulated genes: (eval=false for first pass)

## Expression-level/significance relationship

Scatter plot of significant genes only:

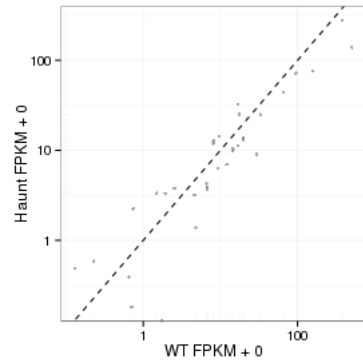

Volcano Plot

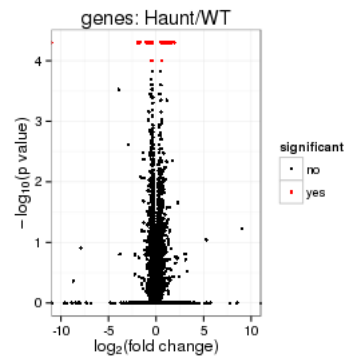

Volcano plot with significant genes only:

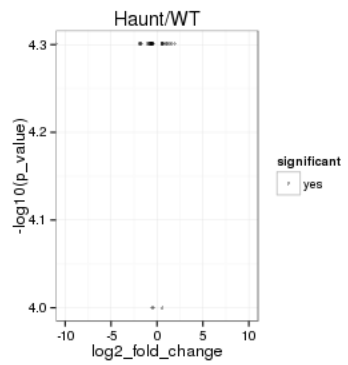

FoldChange Heatmap

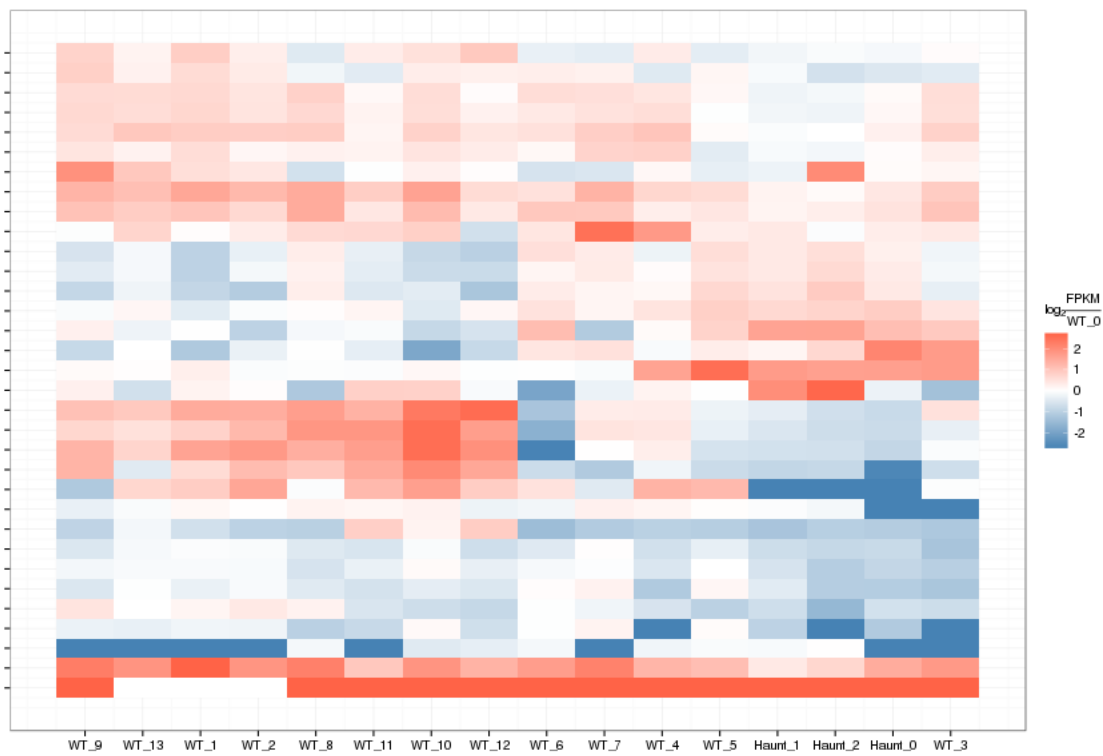

## Differential Splicing

Differential Isoforms between conditions

Per isoform difference between conditions:

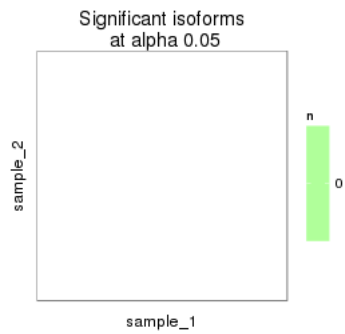

These isoforms are:

```
[1] "no sig isoforms"
```

Gene-level DE isoform heatmap

```
## [1] "no sig isoforms"
```

Isoform foldchange heatmap by isoform:

```
## [1] "no sig isoforms"
```

## Differential Splicing between conditions

(eval false for first pass)

Per condition differences in isoforms (Does gene have diff piechart between conditions?)

These genes are:

Splicing heatmap by isoform:

Splicing heatmap by gene

The following are significantly differentially spliced genes (relative portion of isoform per condition):

## Gene/Pathway Analysis

### GSEA

Enrichment and zscores are calculated based on expression in KO vs WT (fpkmKO/fpkmWT), so genes that are down regulated in KO are shown in blue, while upregulation is shown in red.

KO/WT Blue = down in KO Red = Up in KO

Biocarta enrichment:

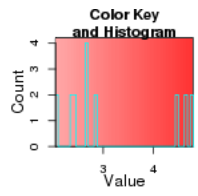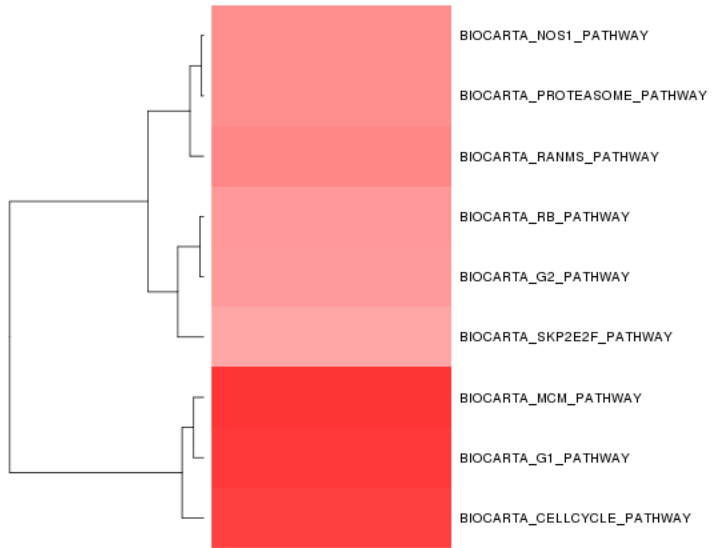

Biocarta zscore:



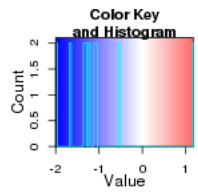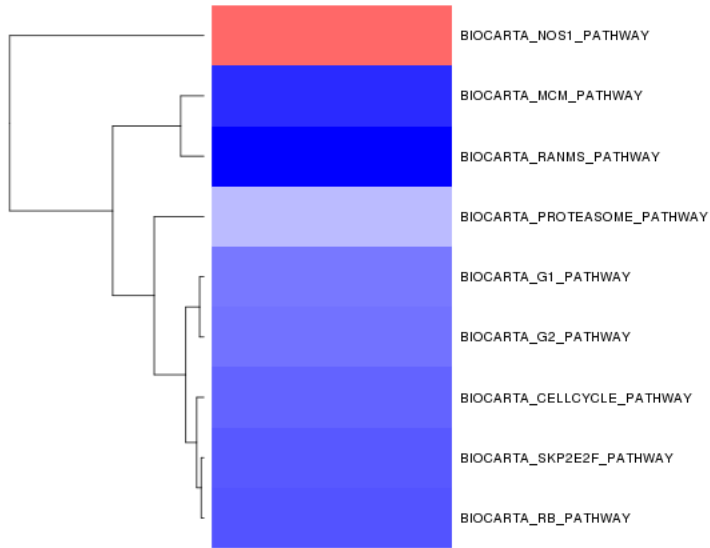

Reactome enrichment:

```
## Error: no locations are finite
```

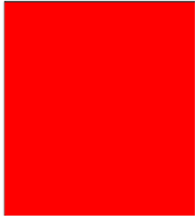

\_\_\_\_\_

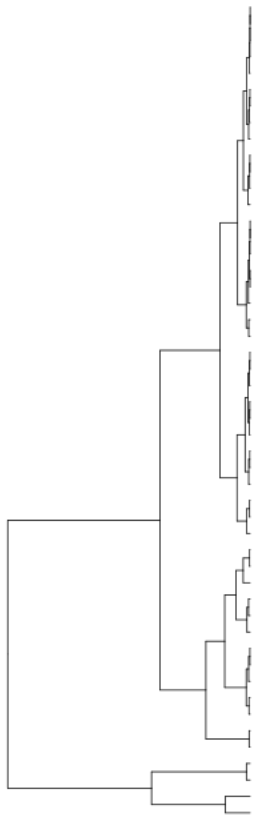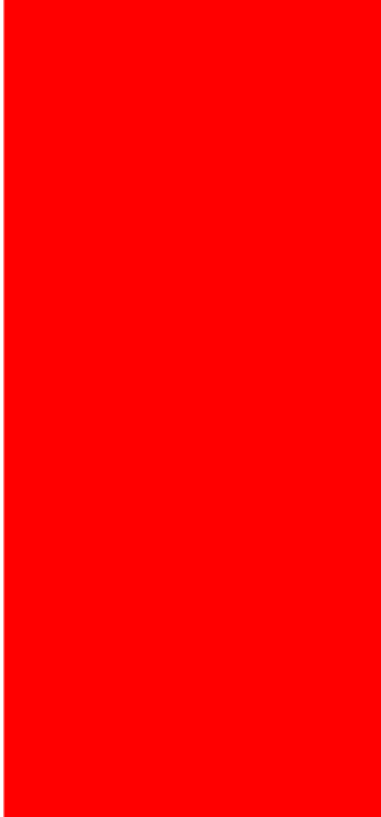

REACTOME\_METABOLISM\_OF\_PROTEINS  
REACTOME\_SIGNALING\_BY\_NOTCH  
REACTOME\_CYCLIN\_E\_ASSOCIATED\_EVENTS  
REACTOME\_CDT1\_ASSOCIATION\_WITH\_THE\_C  
REACTOME\_AUTODEGRADATION\_OF\_CDH1\_B  
REACTOME\_REGULATION\_OF\_MRNA\_STABILIT  
REACTOME\_TRANSMISSION\_ACROSS\_CHEMIC  
REACTOME\_SCF5KIP2\_MEDIATED\_DEGRADATI  
REACTOME\_SRP\_DEPENDENT\_COTRANSLATIC  
REACTOME\_ACTIVATION\_OF\_ATR\_IN\_RESPON  
REACTOME\_SIGNALING\_BY\_GPCR  
REACTOME\_HOST\_INTERACTIONS\_OF\_HIV\_FA  
REACTOME\_HIV\_LIFE\_CYCLE  
REACTOME\_NONSENSE\_MEDIATED\_DECAY\_E  
REACTOME\_PEPTIDE\_CHAIN\_ELONGATION  
REACTOME\_APC\_C\_CDC20\_MEDIATED\_DEGRA  
REACTOME\_ACTIVATION\_OF\_THE\_PRE\_REPLI  
REACTOME\_GPCR\_DOWNSTREAM\_SIGNALING  
REACTOME\_INFLUENZA\_VIRAL\_RNA\_TRANSCF  
REACTOME\_APC\_C\_CDH1\_MEDIATED\_DEGRAI  
REACTOME\_POTASSIUM\_CHANNELS  
REACTOME\_HIV\_INFECTION  
REACTOME\_ACTIVATION\_OF\_THE\_MRNA\_UPO  
REACTOME\_TRANSLATION  
REACTOME\_G2\_M\_CHECKPOINTS  
REACTOME\_FORMATION\_OF\_THE\_TERNARY\_C  
REACTOME\_ASSEMBLY\_OF\_THE\_PRE\_REPLIC  
REACTOME\_DNA\_STRAND\_ELONGATION  
REACTOME\_CHROMOSOME\_MAINTENANCE  
REACTOME\_ORC1\_REMOVAL\_FROM\_CHROMA  
REACTOME\_MRNA\_SPLICING  
REACTOME\_REGULATION\_OF\_MITOTIC\_CELL\_  
REACTOME\_3\_UTR\_MEDIATED\_TRANSLATION  
REACTOME\_S\_PHASE  
REACTOME\_CELL\_CYCLE\_CHECKPOINTS  
REACTOME\_METABOLISM\_OF\_MRNA  
REACTOME\_PROCESSING\_OF\_CAPPED\_INTRC  
REACTOME\_G1\_S\_TRANSITION  
REACTOME\_SYNTHESIS\_OF\_DNA  
REACTOME\_INFLUENZA\_LIFE\_CYCLE  
REACTOME\_M\_G1\_TRANSITION  
REACTOME\_MRNA\_PROCESSING  
REACTOME\_NEURONAL\_SYSTEM  
REACTOME\_MITOTIC\_PROMETAPHASE  
REACTOME\_METABOLISM\_OF\_RNA  
REACTOME\_MITOTIC\_G1\_G1\_S\_PHASES  
REACTOME\_CELL\_CYCLE  
REACTOME\_CELL\_CYCLE\_MITOTIC  
REACTOME\_DNA\_REPLICATION  
REACTOME\_MITOTIC\_M\_M\_G1\_PHASES

Reactome zscore:

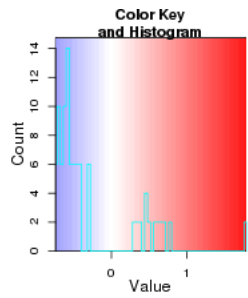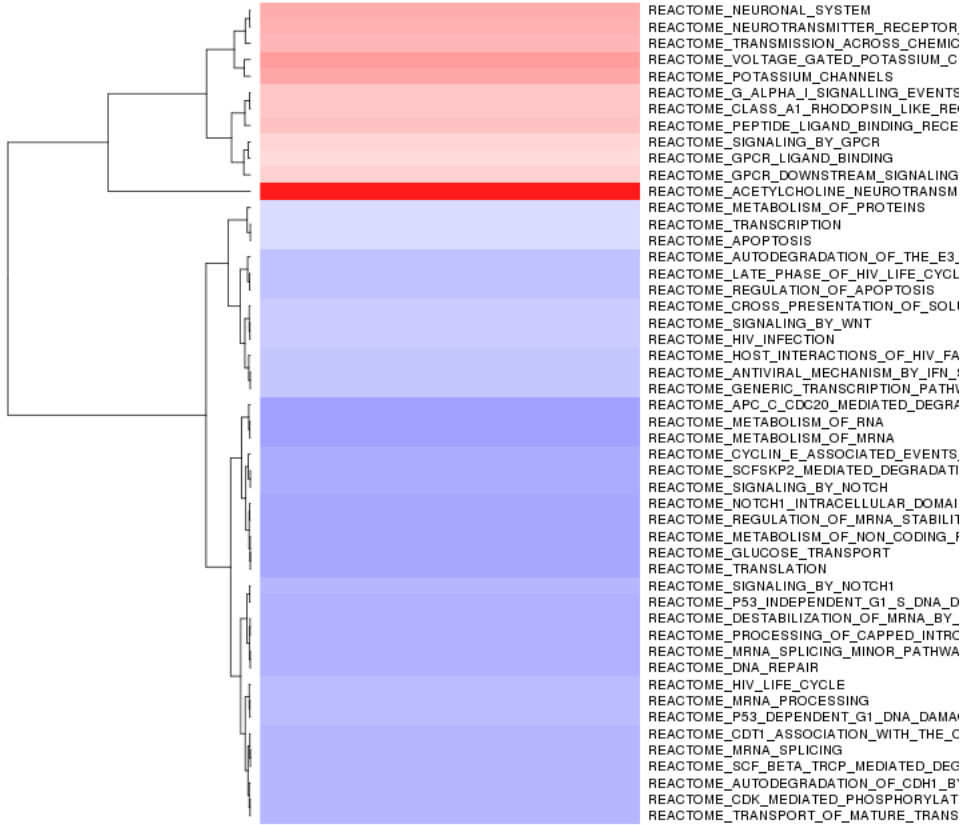

Kegg enrichment:

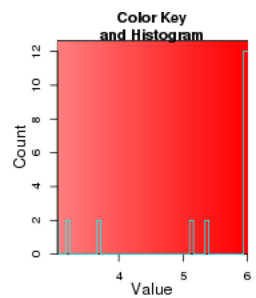

\_\_\_\_\_

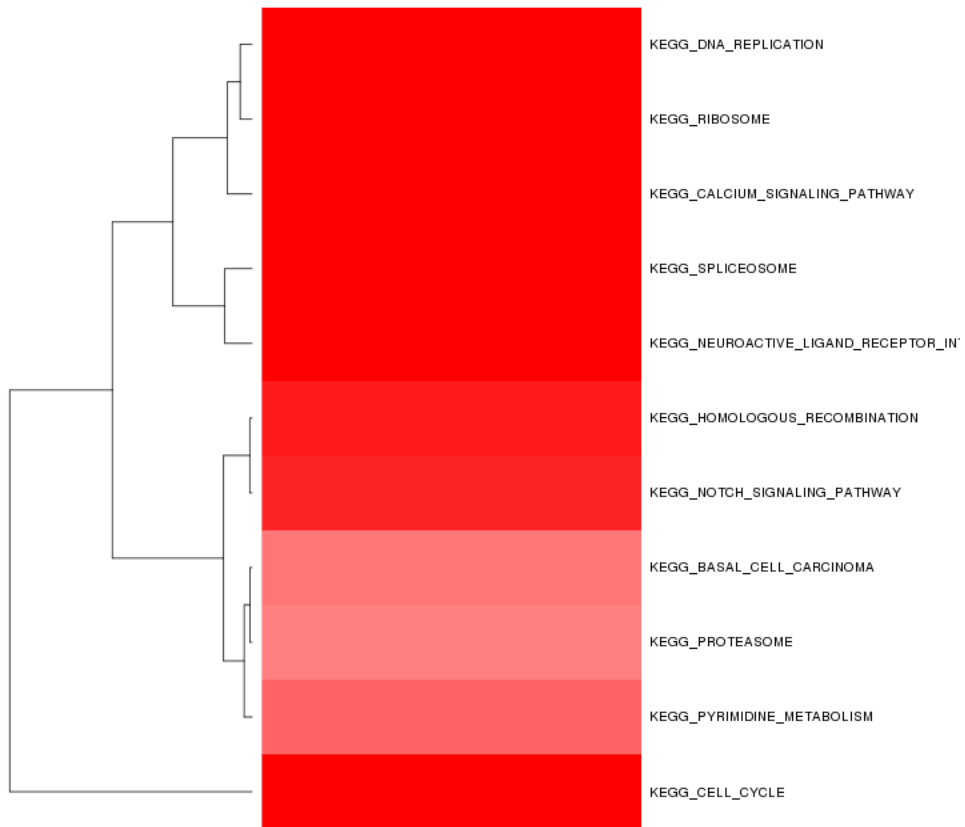

Kegg zscore:

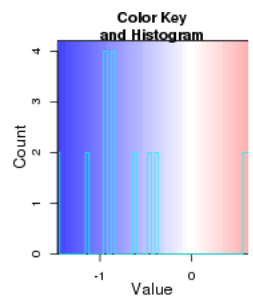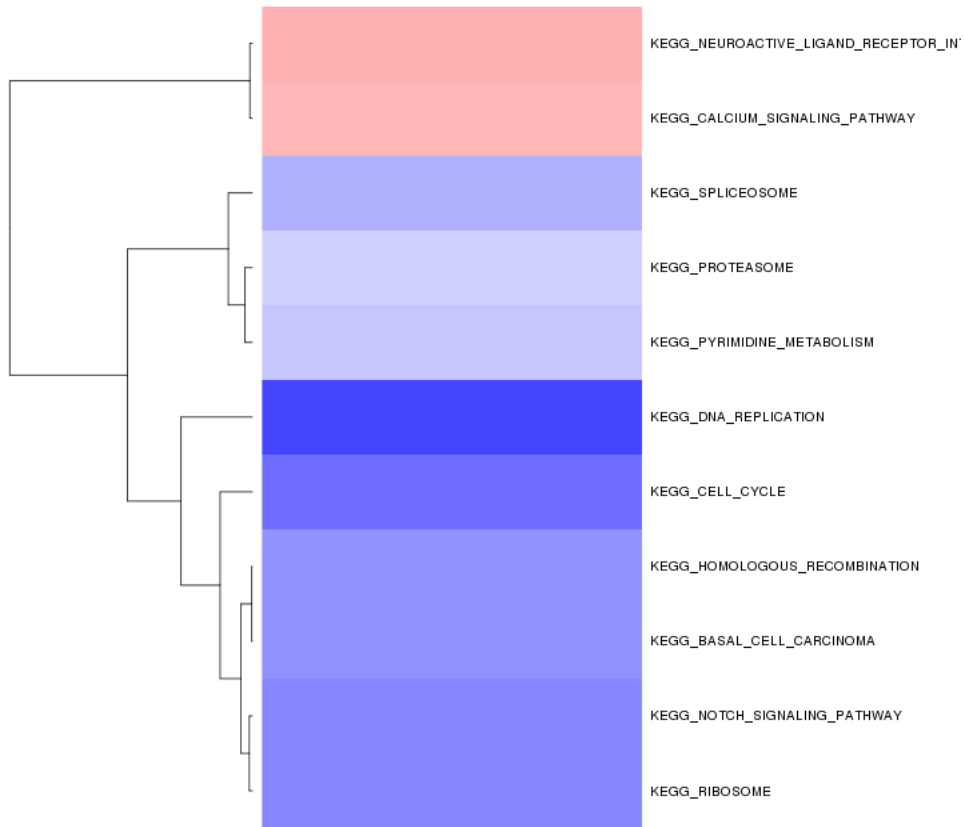

Interneuron enrichment:

## Error: no locations are finite



5HT\_genes

Lhx6\_genes

Interneuron zscore:

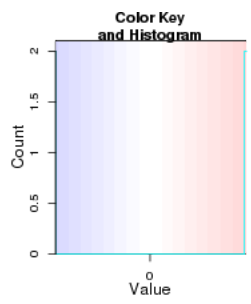

—

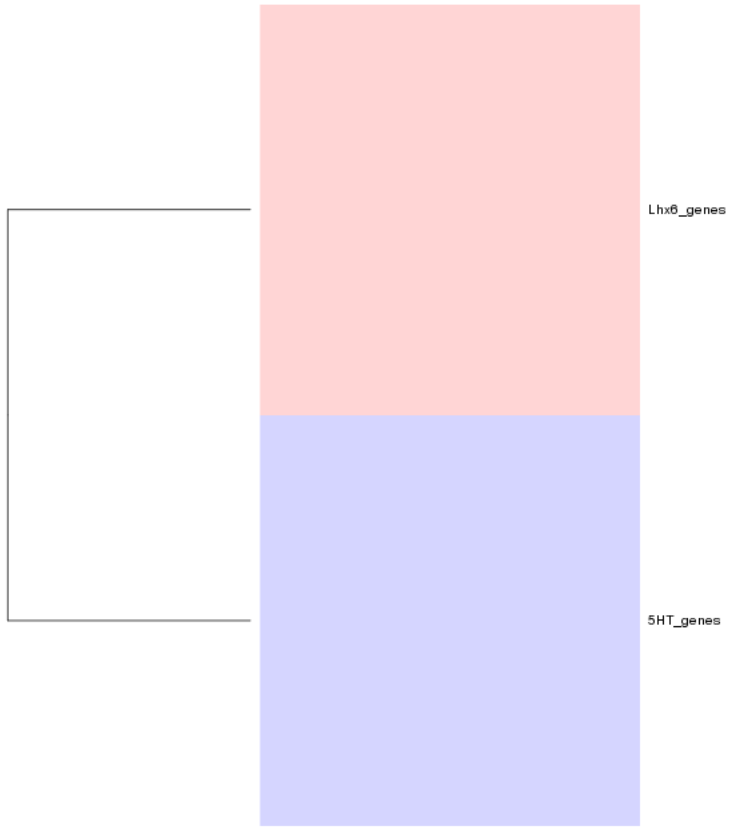

Oncogene enrichment:

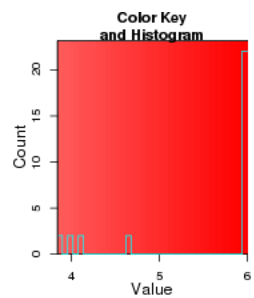

\_\_\_\_\_

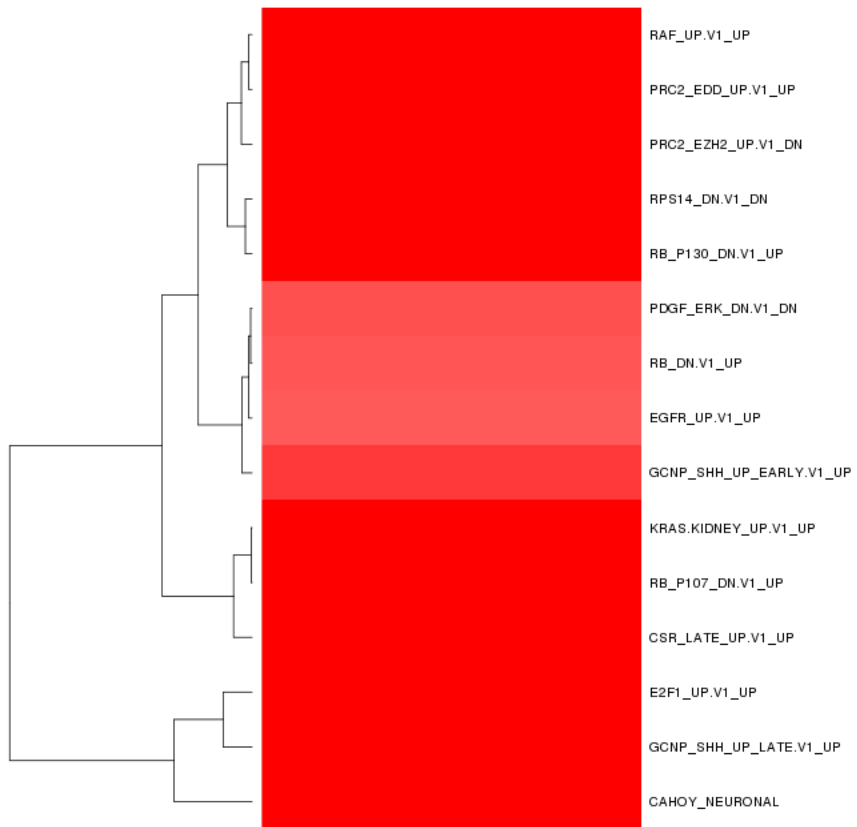

Oncogene zscore:



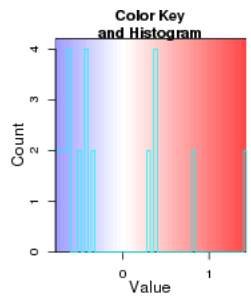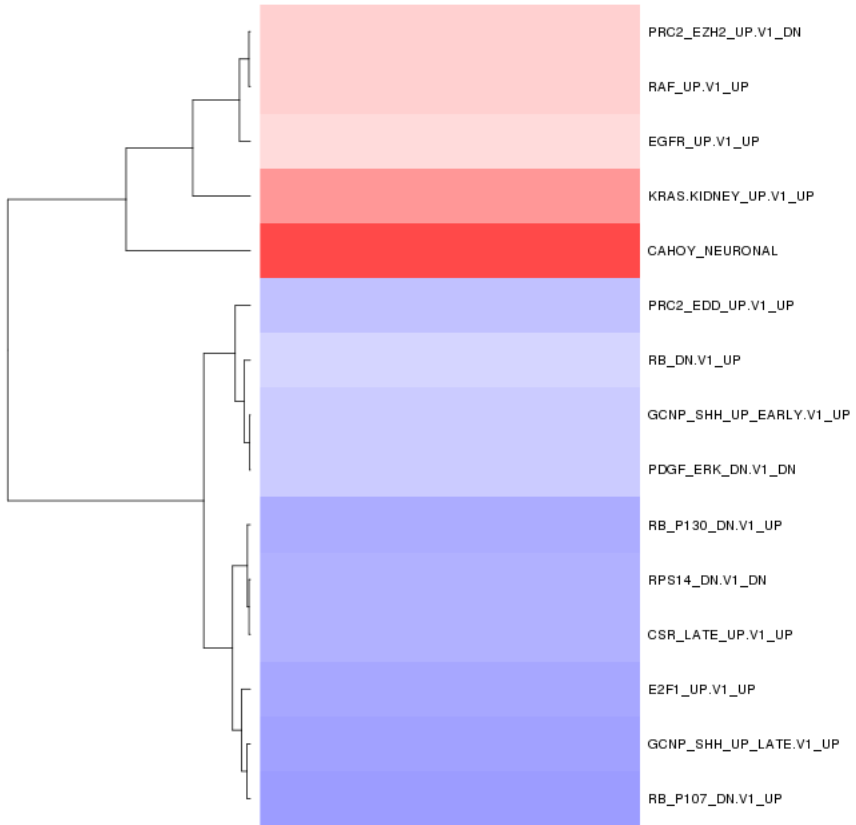

Immuno enrichment:

## Error: no locations are finite



\_\_\_\_\_

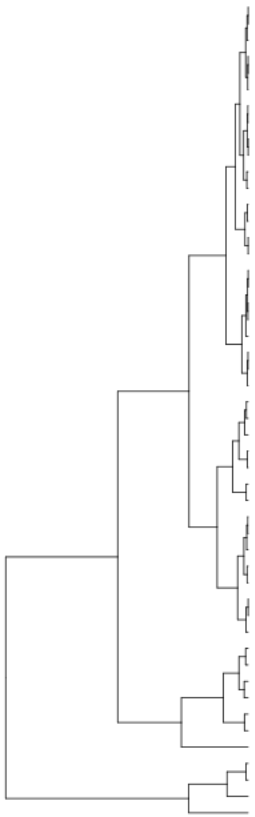

GSE12845\_NAIVE\_VS\_PRE\_GC\_TONSIL\_BCEL  
GSE3982\_EFF\_MEMORY\_CD4\_TCELL\_VS\_TH2  
GSE9006\_TYPE\_1\_DIABETES\_AT\_DX\_VS\_1MC  
GSE15930\_NAIVE\_VS\_24H\_IN\_VITRO\_STIM\_IN  
GSE300\_L\_MAJOR\_VS\_T\_GONDII\_MAC\_DN  
GSE15930\_NAIVE\_VS\_48H\_IN\_VITRO\_STIM\_IL  
GSE17974\_CTRL\_VS\_ACT\_IL4\_AND\_ANTI\_IL12  
GSE24634\_TEFF\_VS\_TCONV\_DAY3\_IN\_CULTU  
GSE31082\_DP\_VS\_CD8\_SP\_THYMOCYTE\_UP  
GSE12306\_GC\_VS\_NAIVE\_BCELL\_UP  
GSE3982\_MAC\_VS\_TH1\_DN  
GSE12306\_GC\_VS\_MEMORY\_BCELL\_UP  
GOLDRATH\_NAIVE\_VS\_EFF\_CD8\_TCELL\_DN  
GSE22886\_NAIVE\_CD4\_TCELL\_VS\_48H\_ACT\_  
GSE10239\_NAIVE\_VS\_KLRG1HIGH\_EFF\_CD8\_  
GSE3982\_MEMORY\_CD4\_TCELL\_VS\_TH2\_DN  
GSE19825\_CD24LOW\_VS\_IL2RA\_HIGH\_DAY3\_  
GSE24634\_TREG\_VS\_TCONV\_POST\_DAYS\_IL4  
GSE15930\_NAIVE\_VS\_24H\_IN\_VITRO\_STIM\_CI  
GSE24634\_TEFF\_VS\_TCONV\_DAY10\_IN\_CULTI  
GSE22886\_UNSTIM\_VS\_STIM\_MEMORY\_TCELL  
GSE9988\_LOW\_LPS\_VS\_CTRL\_TREATED\_MON  
GSE15930\_NAIVE\_VS\_24H\_IN\_VITRO\_STIM\_IL  
GSE1460\_INTRATHYMIC\_T\_PROGENITOR\_VS\_  
GSE24634\_TEFF\_VS\_TCONV\_DAY7\_IN\_CULTU  
GSE12845\_IGD\_POS\_BLOOD\_VS\_PRE\_GC\_TO  
GOLDRATH\_EFF\_VS\_MEMORY\_CD8\_TCELL\_UP  
GSE17974\_0H\_VS\_24H\_IN\_VITRO\_ACT\_CD4\_T  
GSE24634\_TREG\_VS\_TCONV\_POST\_DAY3\_IL4  
GSE9006\_TYPE\_1\_VS\_TYPE\_2\_DIABETES\_PB  
GSE15930\_NAIVE\_VS\_48H\_IN\_VITRO\_STIM\_CI  
GSE24026\_PDI\_LIGATION\_VS\_CTRL\_IN\_ACT\_  
GSE19825\_NAIVE\_VS\_IL2RAHIGH\_DAY3\_EFF\_  
GSE24634\_TEFF\_VS\_TCONV\_DAYS\_IN\_CULTU  
GSE10239\_NAIVE\_VS\_DAY4.5\_EFF\_CD8\_TCEL  
GSE15930\_NAIVE\_VS\_48H\_IN\_VITRO\_STIM\_IF  
GSE31082\_DN\_VS\_CD4\_SP\_THYMOCYTE\_UP  
KAECH\_DAY8\_EFF\_VS\_DAY15\_EFF\_CD8\_TOEL  
GSE15930\_NAIVE\_VS\_72H\_IN\_VITRO\_STIM\_TF  
GSE22886\_UNSTIM\_VS\_IL15\_STIM\_NKCELL\_D  
GSE7764\_IL15\_TREATED\_VS\_CTRL\_NK\_CELL\_  
GSE24634\_TREG\_VS\_TCONV\_POST\_DAY7\_IL4  
GSE30476\_CTRL\_VS\_TSST\_ACT\_40H\_MEMOR  
GSE30476\_CTRL\_VS\_TSST\_ACT\_72H\_MEMOR  
GSE22886\_UNSTIM\_VS\_IL2\_STIM\_NKCELL\_DN  
GSE30476\_CTRL\_VS\_TSST\_ACT\_40H\_MEMOR  
GSE30902\_PRIMARY\_VS\_SECONDARY\_ACUTE  
GSE15750\_DAY6\_VS\_DAY10\_EFF\_CD8\_TCELL  
GSE30476\_CTRL\_VS\_TSST\_ACT\_72H\_MEMOR  
GSE15750\_DAY6\_VS\_DAY10\_TRAF6KO\_EFF\_C

Immuno zscore:

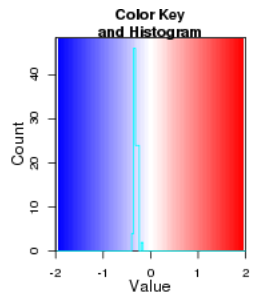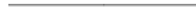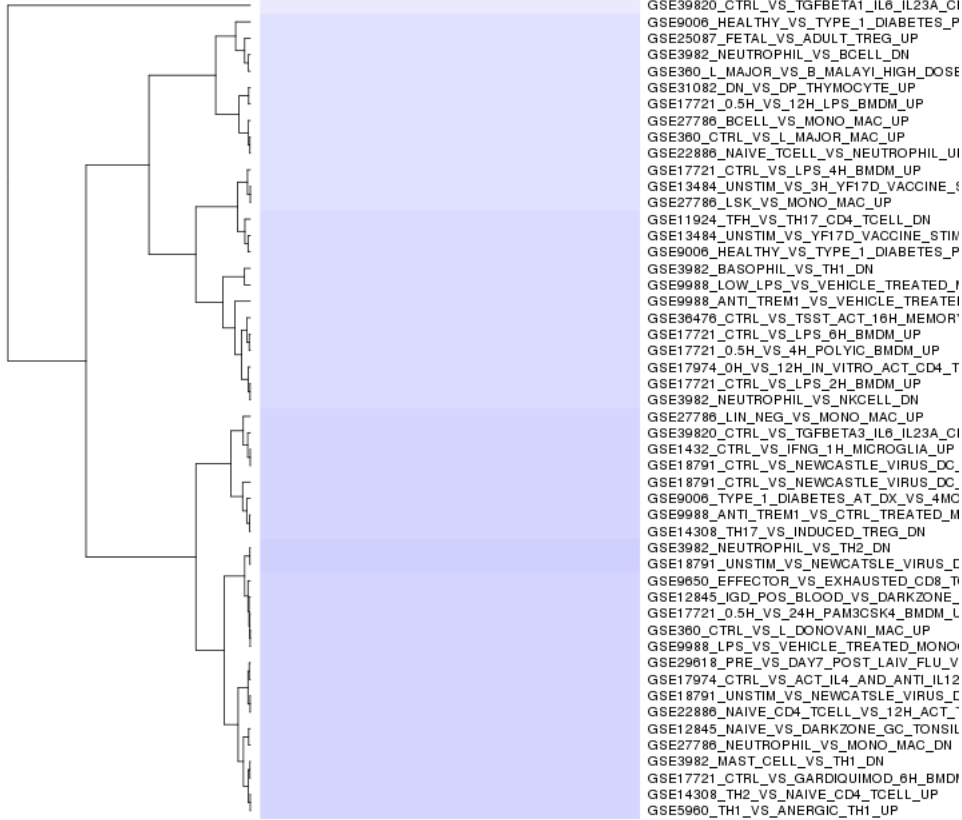

TF enrichment:

## Error: subscript out of bounds

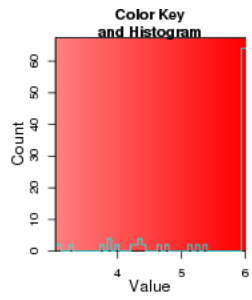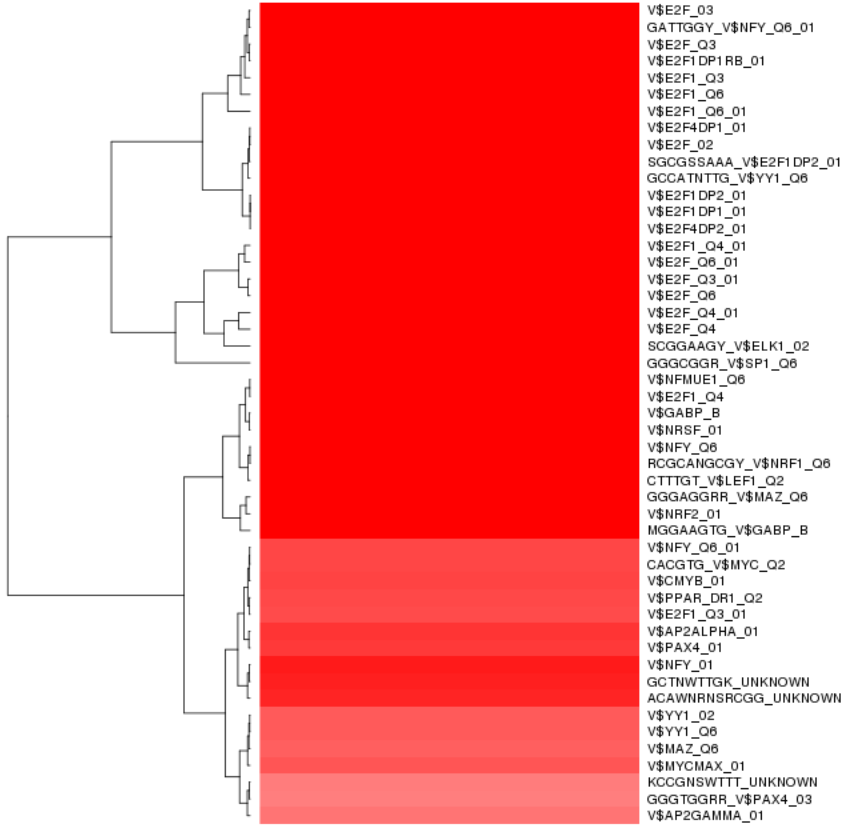

TF zscore:

## Error: subscript out of bounds

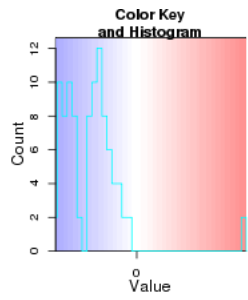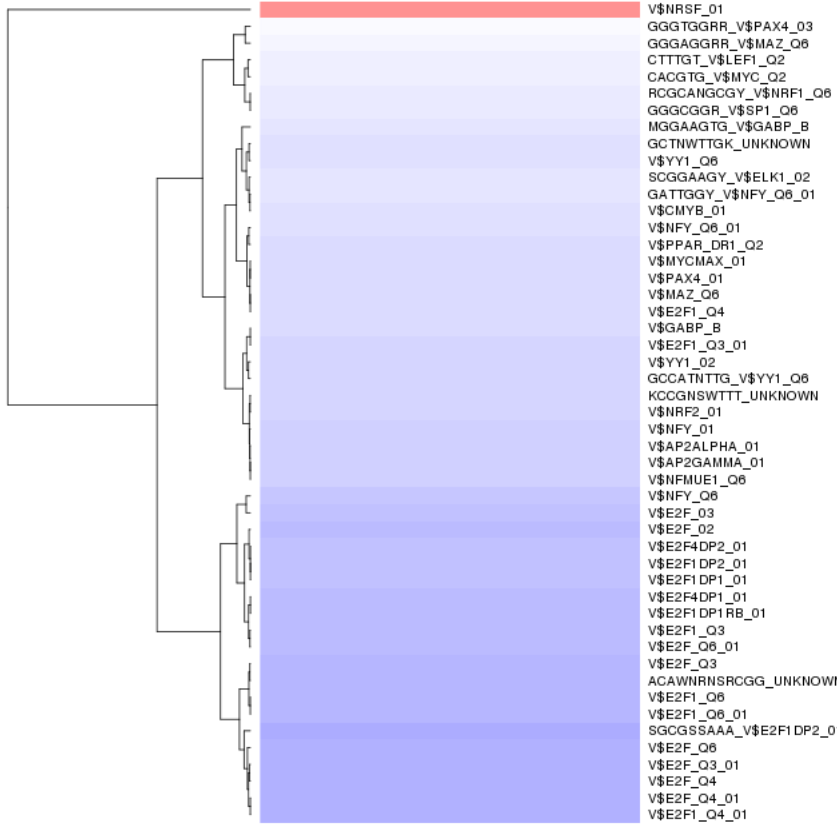

## GO enrichment

Cluster profiler used to call enrichments of significantly differentially regulated genes that map to Entrez IDs.

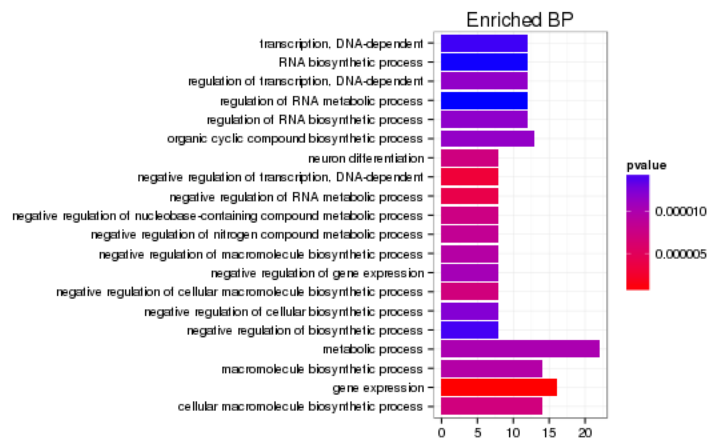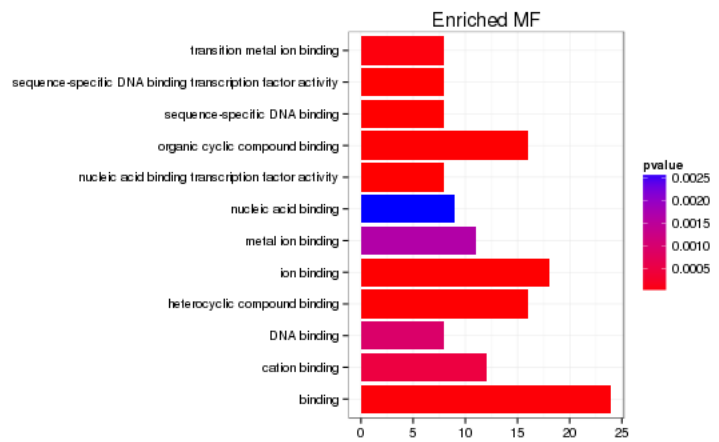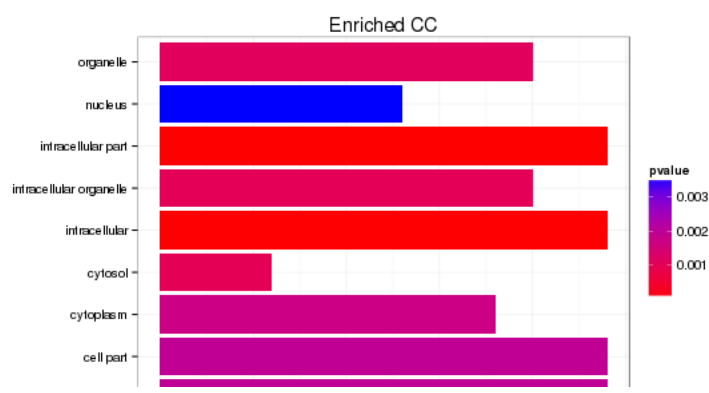

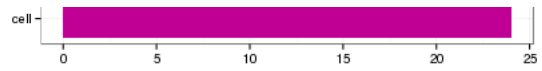

```
## Error: need finite 'xlim' values
```

```
## Error: need finite 'xlim' values
```

## Enrichment or depletion for stage-specific cell cycle markers

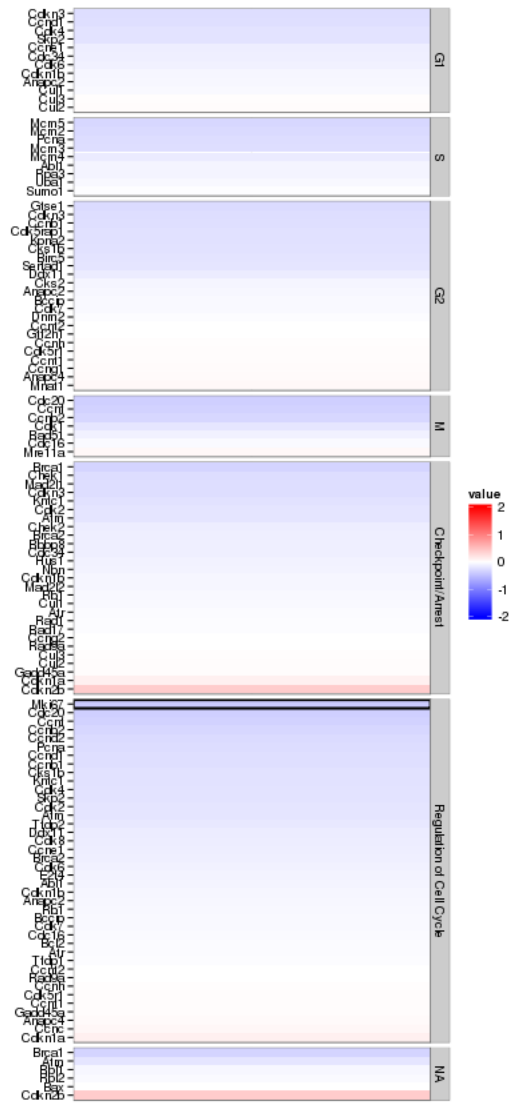



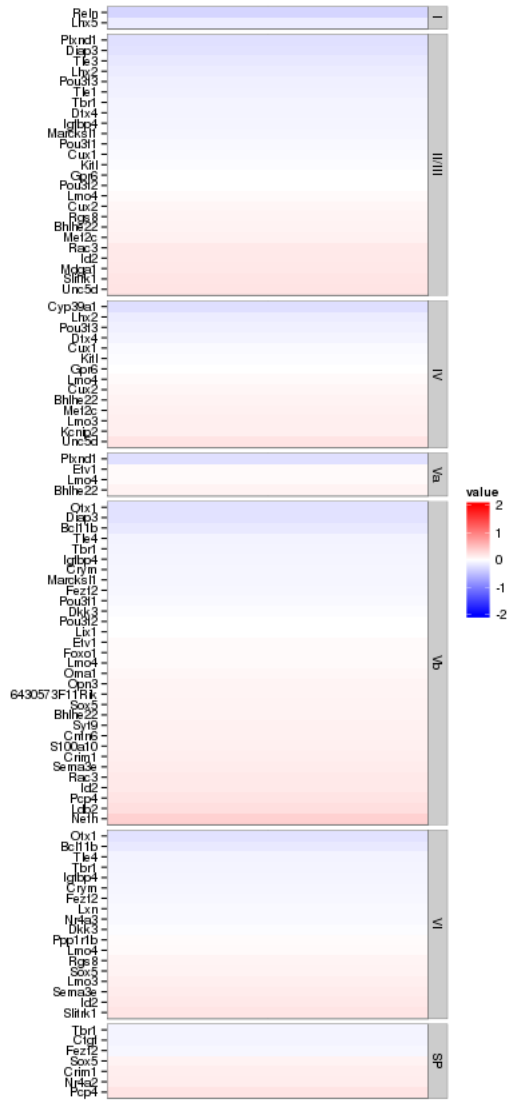

Enrichment or depletion for specific neural cell types

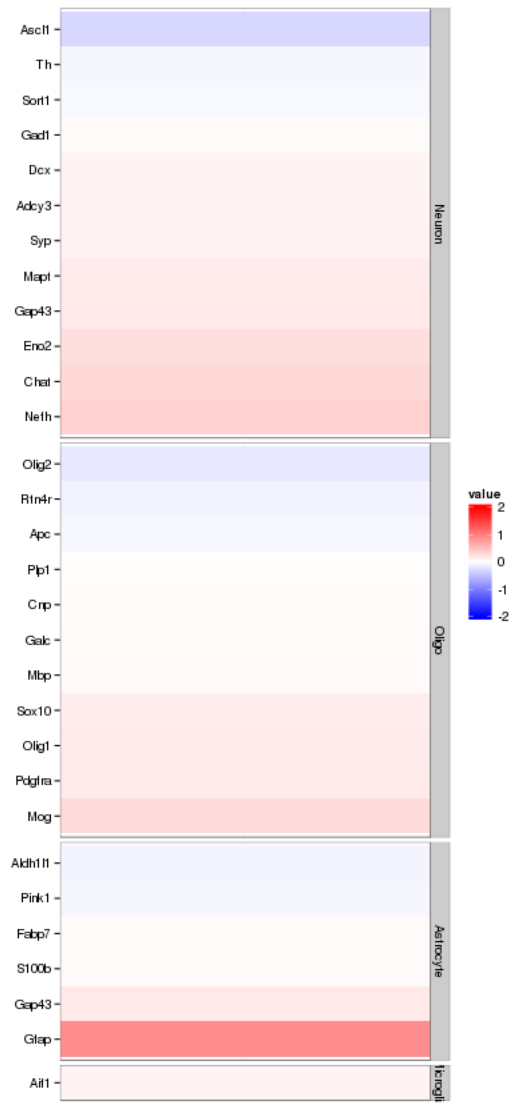

**Enrichment or Depletion of neural differentiation markers**

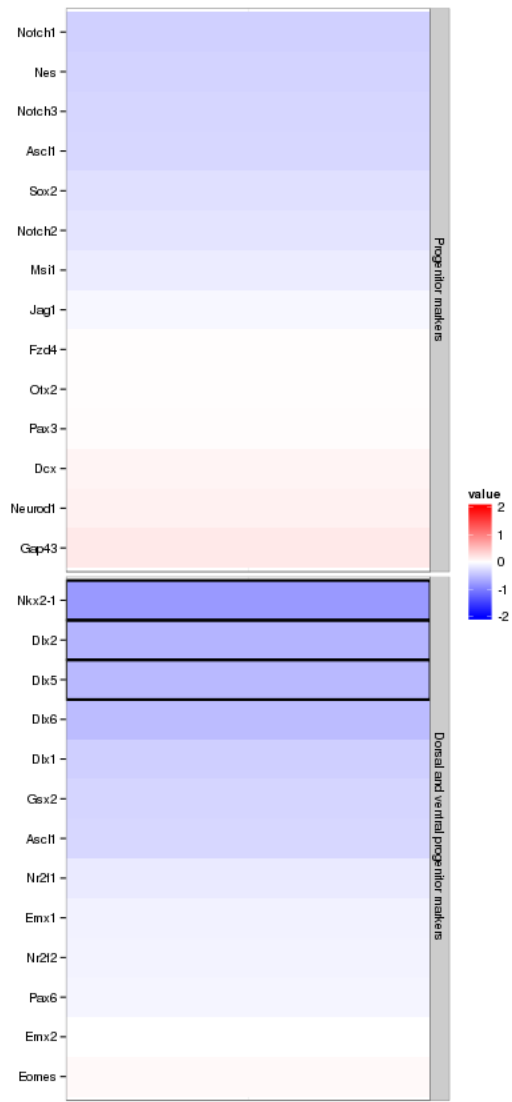

## Cis vs Trans (locally)

$\log_2$  Foldchange and test statistic are calculated with the ratio of  $\text{fpm(KO)}/\text{fpm(WT)}$ , thus the test\_stat is positive if a gene is higher in the KO and negative if a gene has lower expression in the KO

The pvalue for 0 genes significantly regulated in a region this size is: 1

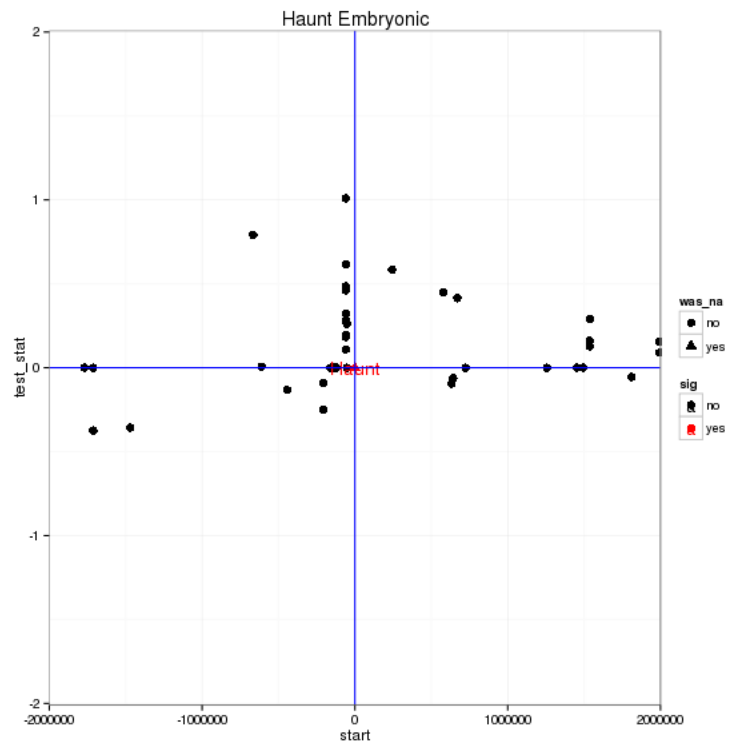

## Notes

Samples used are:

10

- 1 JR753
- 2 JR750
- 3 JR771
- 4 JR755
- 5 JR811
- 6 JR768
- 7 JR761
- 8 JR815
- 9 JR789
- 10 JR748
- 11 JR716
- 12 JR717
- 13 JR719
- 14 JR756

15 JR754  
16 JR767  
17 JR759

## Replicates

| file                                                                          | sample_name | replicate | rep_name | total_mass  | norm_mass   | internal_scale | external_scale |
|-------------------------------------------------------------------------------|-------------|-----------|----------|-------------|-------------|----------------|----------------|
| 1 /n/rinn_data1/seq/fgoff/Projects/BrainMap/data/quants/JR753/abundances.cxb  | WT          | 0         | WT_0     | 39331900.00 | 32555300.00 | 1.25           | 1.00           |
| 2 /n/rinn_data1/seq/fgoff/Projects/BrainMap/data/quants/JR750/abundances.cxb  | WT          | 1         | WT_1     | 36031100.00 | 32555300.00 | 1.09           | 1.00           |
| 3 /n/rinn_data1/seq/fgoff/Projects/BrainMap/data/quants/JR771/abundances.cxb  | WT          | 2         | WT_2     | 38857100.00 | 32555300.00 | 1.22           | 1.00           |
| 4 /n/rinn_data1/seq/fgoff/Projects/BrainMap/data/quants/JR755/abundances.cxb  | WT          | 3         | WT_3     | 41811300.00 | 32555300.00 | 1.27           | 1.00           |
| 5 /n/rinn_data1/seq/fgoff/Projects/BrainMap/data/quants/JR811/abundances.cxb  | WT          | 4         | WT_4     | 38172800.00 | 32555300.00 | 1.19           | 1.00           |
| 6 /n/rinn_data1/seq/fgoff/Projects/BrainMap/data/quants/JR768/abundances.cxb  | WT          | 5         | WT_5     | 28375200.00 | 32555300.00 | 0.88           | 1.00           |
| 7 /n/rinn_data1/seq/fgoff/Projects/BrainMap/data/quants/JR761/abundances.cxb  | WT          | 6         | WT_6     | 31706200.00 | 32555300.00 | 0.96           | 1.00           |
| 8 /n/rinn_data1/seq/fgoff/Projects/BrainMap/data/quants/JR815/abundances.cxb  | WT          | 7         | WT_7     | 29733100.00 | 32555300.00 | 0.91           | 1.00           |
| 9 /n/rinn_data1/seq/fgoff/Projects/BrainMap/data/quants/JR789/abundances.cxb  | WT          | 8         | WT_8     | 27681500.00 | 32555300.00 | 0.85           | 1.00           |
| 10 /n/rinn_data1/seq/fgoff/Projects/BrainMap/data/quants/JR748/abundances.cxb | WT          | 9         | WT_9     | 32367000.00 | 32555300.00 | 0.95           | 1.00           |
| 11 /n/rinn_data1/seq/fgoff/Projects/BrainMap/data/quants/JR716/abundances.cxb | WT          | 10        | WT_10    | 26144700.00 | 32555300.00 | 0.80           | 1.00           |
| 12 /n/rinn_data1/seq/fgoff/Projects/BrainMap/data/quants/JR717/abundances.cxb | WT          | 11        | WT_11    | 25565400.00 | 32555300.00 | 0.79           | 1.00           |
| 13 /n/rinn_data1/seq/fgoff/Projects/BrainMap/data/quants/JR719/abundances.cxb | WT          | 12        | WT_12    | 22697800.00 | 32555300.00 | 0.68           | 1.00           |
| 14 /n/rinn_data1/seq/fgoff/Projects/BrainMap/data/quants/JR756/abundances.cxb | WT          | 13        | WT_13    | 38948900.00 | 32555300.00 | 1.20           | 1.00           |
| 15 /n/rinn_data1/seq/fgoff/Projects/BrainMap/data/quants/JR754/abundances.cxb | Haunt       | 0         | Haunt_0  | 34277200.00 | 32555300.00 | 1.05           | 1.00           |
| 16 /n/rinn_data1/seq/fgoff/Projects/BrainMap/data/quants/JR767/abundances.cxb | Haunt       | 1         | Haunt_1  | 30963400.00 | 32555300.00 | 0.96           | 1.00           |
| 17 /n/rinn_data1/seq/fgoff/Projects/BrainMap/data/quants/JR759/abundances.cxb | Haunt       | 2         | Haunt_2  | 40179300.00 | 32555300.00 | 1.25           | 1.00           |

## Session Info

```
## R version 3.0.2 (2013-09-25)
## Platform: x86_64-unknown-linux-gnu (64-bit)
##
## locale:
## [1] LC_CTYPE=en_US.UTF-8      LC_NUMERIC=C
## [3] LC_TIME=en_US.UTF-8      LC_COLLATE=en_US.UTF-8
## [5] LC_MONETARY=en_US.UTF-8  LC_MESSAGES=en_US.UTF-8
## [7] LC_PAPER=en_US.UTF-8     LC_NAME=C
## [9] LC_ADDRESS=C             LC_TELEPHONE=C
## [11] LC_MEASUREMENT=en_US.UTF-8 LC_IDENTIFICATION=C
##
## attached base packages:
## [1] grid      parallel  methods  stats    graphics  grDevices  utils
## [8] datasets  base
##
## other attached packages:
## [1] plyr_1.8.1
## [2] stringr_0.6.2
## [3] seqbias_1.10.0
```

```

## [4] BSgenome.Mmusculus.UCSC.mm10_1.3.19
## [5] BSgenome_1.30.0
## [6] Biostrings_2.30.1
## [7] gdata_2.13.3
## [8] GO.db_2.10.1
## [9] org.Mm.eg.db_2.10.1
## [10] clusterProfiler_1.13.1
## [11] DOSE_2.0.0
## [12] ReactomePA_1.6.1
## [13] AnnotationDbi_1.24.0
## [14] Biobase_2.22.0
## [15] mgcv_1.7-29
## [16] nlme_3.1-117
## [17] RMySQL_0.9-3
## [18] RColorBrewer_1.0-5
## [19] gridExtra_0.9.1
## [20] gtable_0.1.2
## [21] marray_1.40.0
## [22] gplots_2.13.0
## [23] GSA_1.03
## [24] limma_3.18.13
## [25] xtable_1.7-3
## [26] cummeRbund_2.7.2
## [27] Gviz_1.6.0
## [28] rtracklayer_1.22.7
## [29] GenomicRanges_1.14.4
## [30] XVector_0.2.0
## [31] IRanges_1.20.7
## [32] fastcluster_1.1.13
## [33] reshape2_1.4
## [34] ggplot2_1.0.0
## [35] RSQLite_0.11.4
## [36] DBI_0.2-7
## [37] BiocGenerics_0.8.0
## [38] knitr_1.6
##
## loaded via a namespace (and not attached):
## [1] biomaRt_2.18.0      biovizBase_1.10.8   bitops_1.0-6
## [4] caTools_1.17        cluster_1.15.2      colorspace_1.2-4
## [7] dichromat_2.0-0     digest_0.6.4        DO.db_2.7
## [10] evaluate_0.5.5      formatR_0.10        Formula_1.1-1
## [13] GenomicFeatures_1.14.5 GOSemSim_1.20.3     graph_1.40.1
## [16] graphite_1.8.1      gtools_3.4.1        Hmisc_3.14-4
## [19] igraph_0.7.1        KEGG.db_2.10.1      KernSmooth_2.23-12
## [22] labeling_0.2        lattice_0.20-29     latticeExtra_0.6-26
## [25] MASS_7.3-33         Matrix_1.1-3        munsell_0.4.2
## [28] org.Hs.eg.db_2.10.1 proto_0.3-10        qvalue_1.36.0
## [31] Rcpp_0.11.2         RCurl_1.95-4.1      reactome.db_1.46.1
## [34] Rsamtools_1.14.3    scales_0.2.4        splines_3.0.2
## [37] stats4_3.0.2        survival_2.37-7     tcltk_3.0.2
## [40] tools_3.0.2         XML_3.98-1.1        zlibbioc_1.8.0

```

## Run Info

```
##          param
## 1      cmd_line
## 2          version
## 3  SVN_revision
## 4  boost_version
## 5          genome
##
## 1 cuffdiff -p 10 -L WT,Haunt -o /n/rinn_data1/seq/lgoff/Projects/BrainMap/data/diffs/Haunt_vs_WT_Embryonic /n/rinn_data1/seq/lgoff/Projects/BrainMap/dat
## 2
## 3
## 4
## 5
```

# Kantr KO vs WT (Adult)

This file shows the wt-v-ko comparison for Kantr.

Cuff overview:

```
## CuffSet instance with:  
## 2 samples  
## 26754 genes  
## 77524 isoforms  
## 0 TSS  
## 23066 CDS  
## 0 promoters  
## 0 splicing  
## 19954 relCDS
```

## QC

### Dispersion

Dispersion plot for genes in cuff: (Overdispersion can lead to innacurate quants)

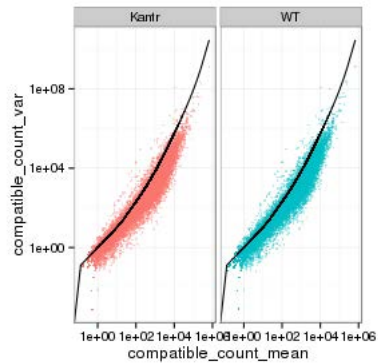

### Cross-replicate variability (fpkmSCVplot)

Differences in CV 2 can result in lower numbers of differentially expressed genes due to a higher degree of variability between replicate fpkm estimates.

Genes:



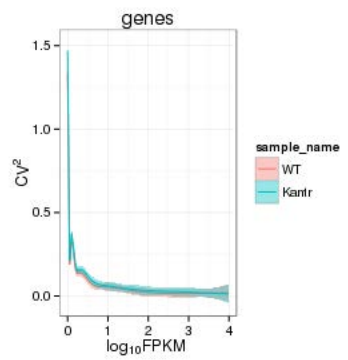

Isoforms:

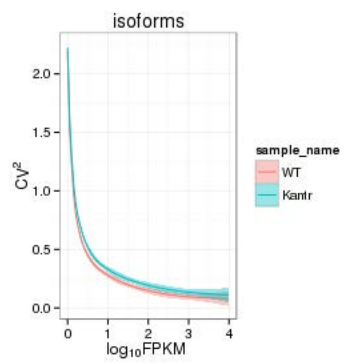

## MvA plot

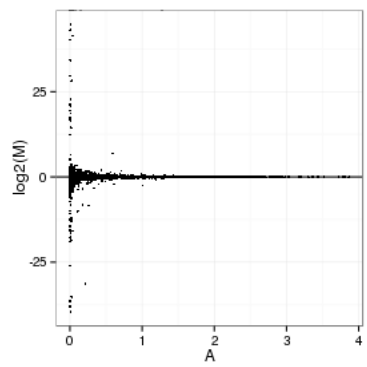

MvA plot counts

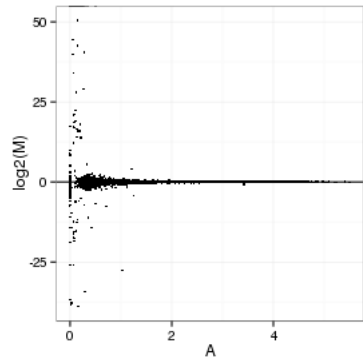

## Scatterplot matrix

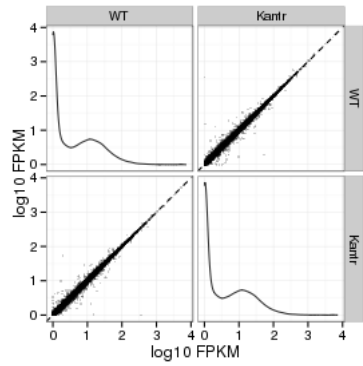

## Distributions

### Boxplots

Boxplot (genes)

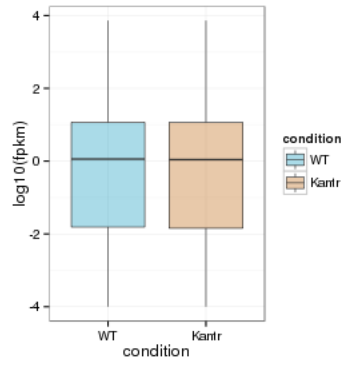

Boxplot (genes, replicates)

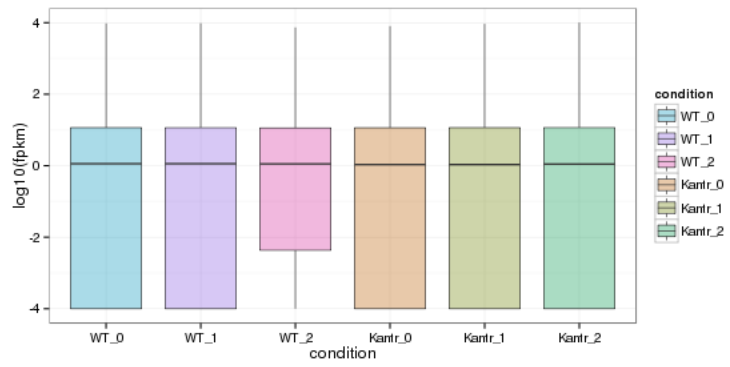

Boxplot (isoforms)

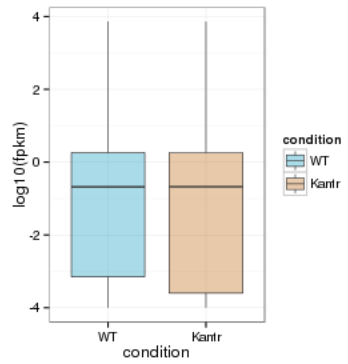

Boxplot (isoforms, replicates)

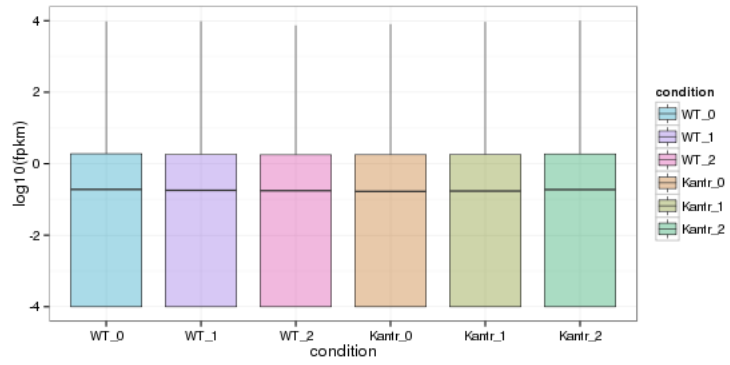

## Density

Density (genes)

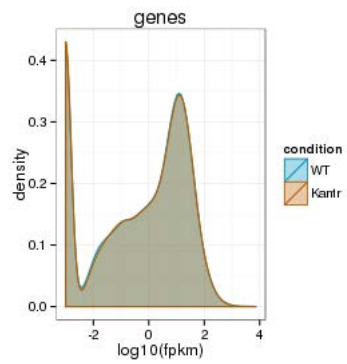

Density (genes, replicates)

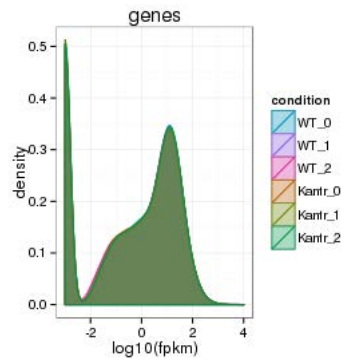

# Clustering

## Replicate Clusters

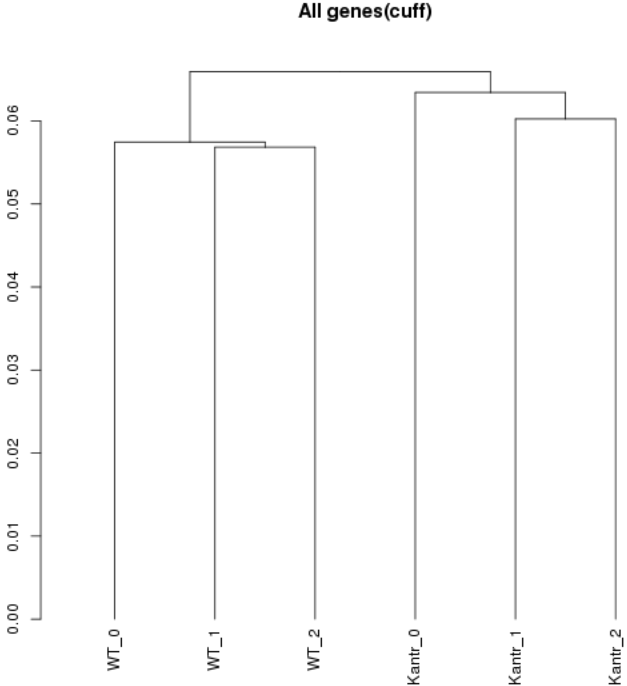

## NULL

## PCA (genes)

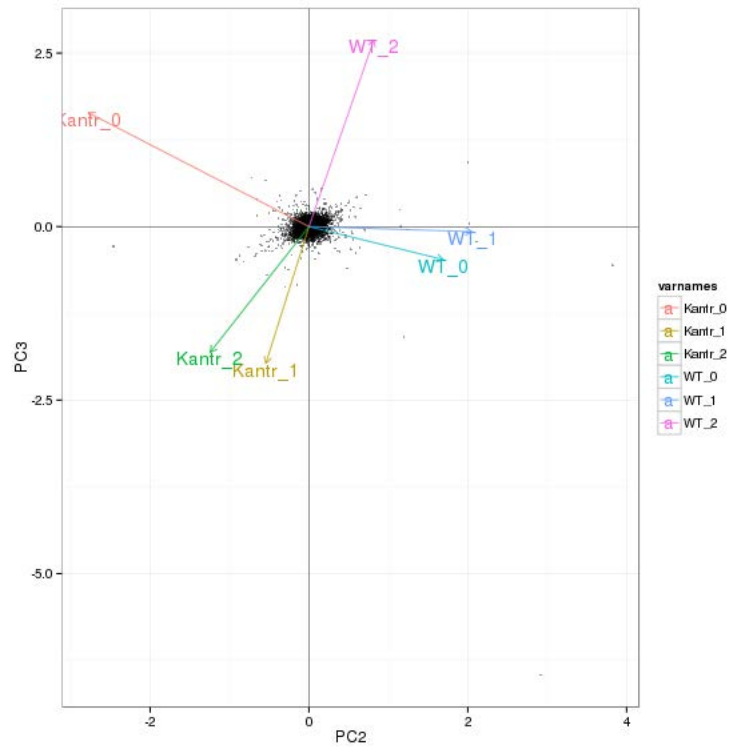

**MDS (genes)**

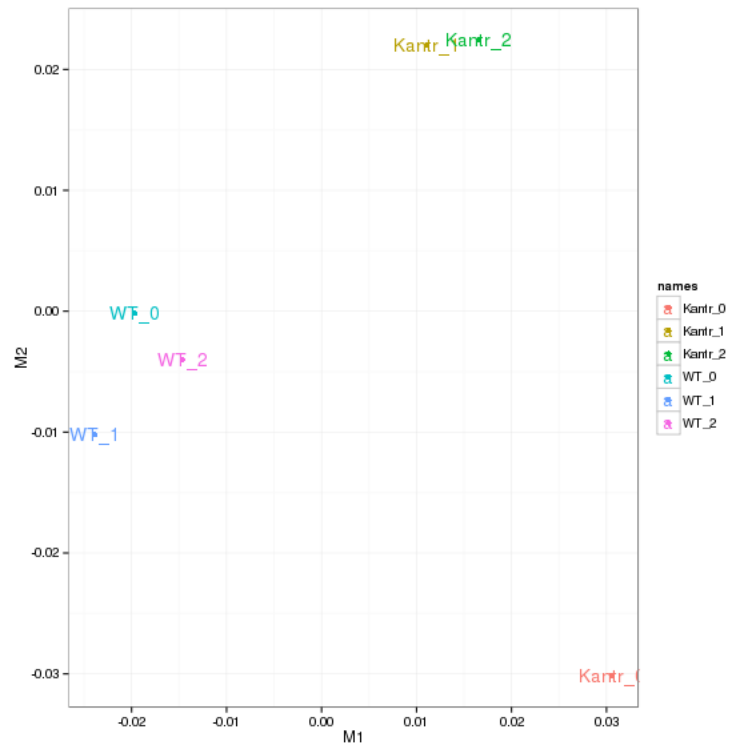

## KO assessment

Endogenous IncRNA expression

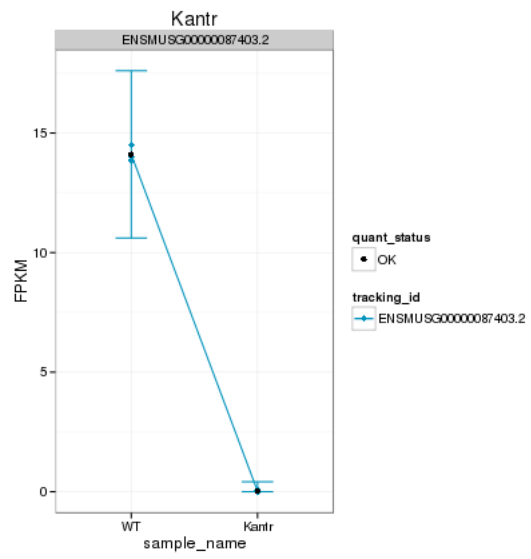

Endogenous expression of Kantr isoforms:



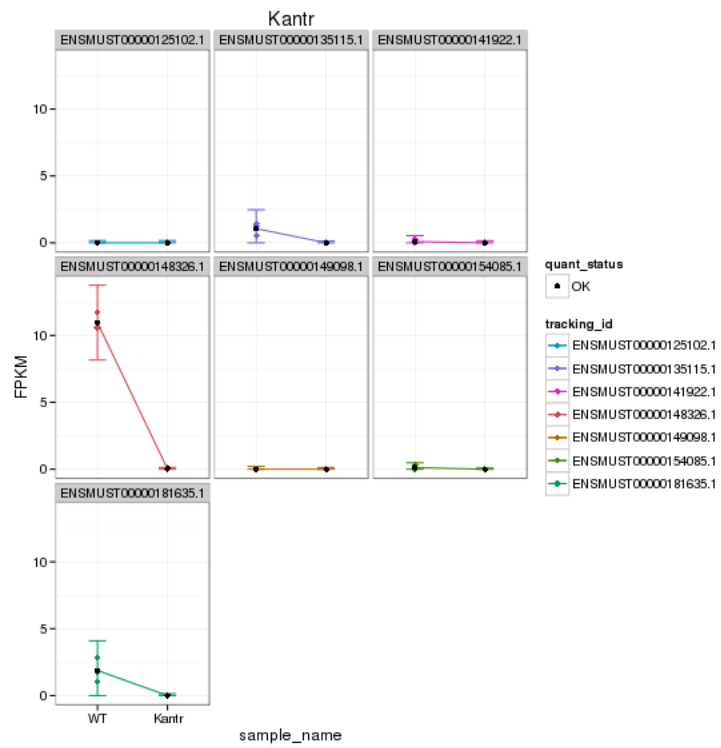

Barplot of gene expression:

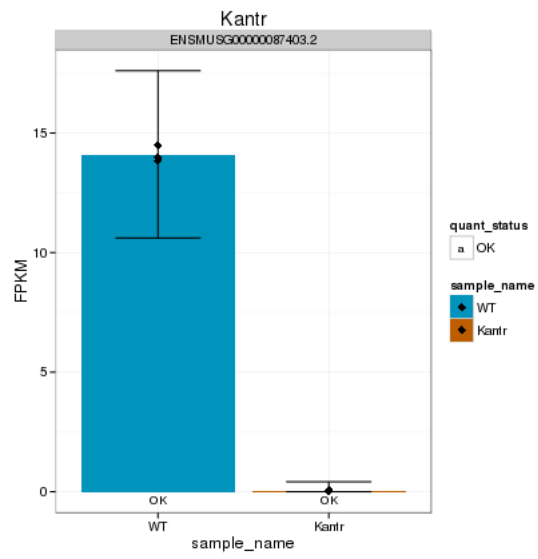

Barplot of isoform expression:

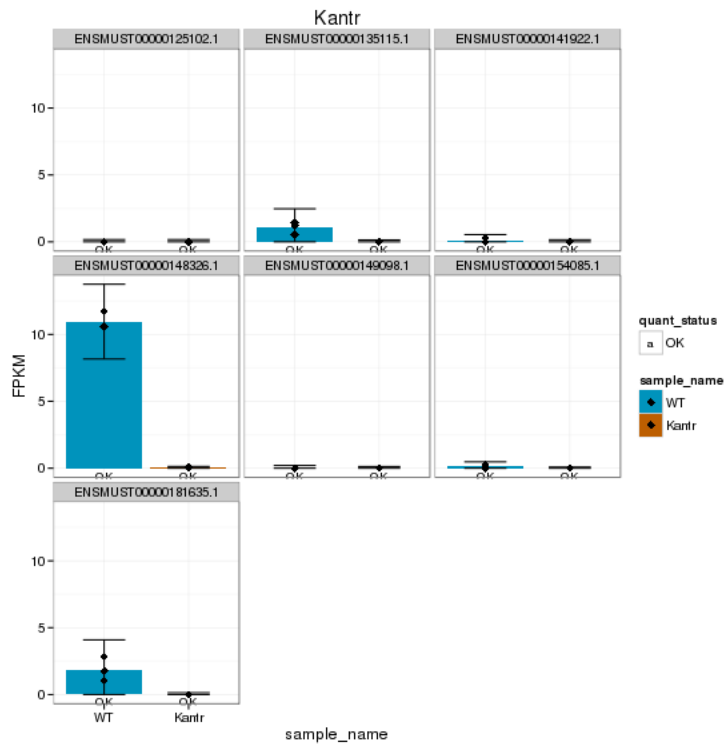

## LacZ expression

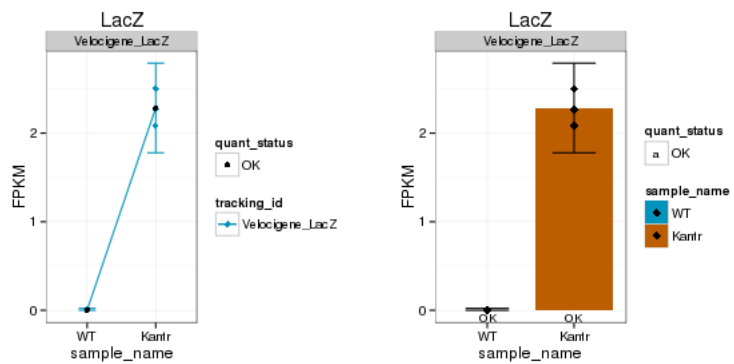

## Digital Genotyping (LacZ vs Endogenous lincRNA and Sex)

Eif2s3y is a y-expressed gene, Xist is an x-expressed gene Expression plot (endogenous linc, lacZ, Y-expressed gene):

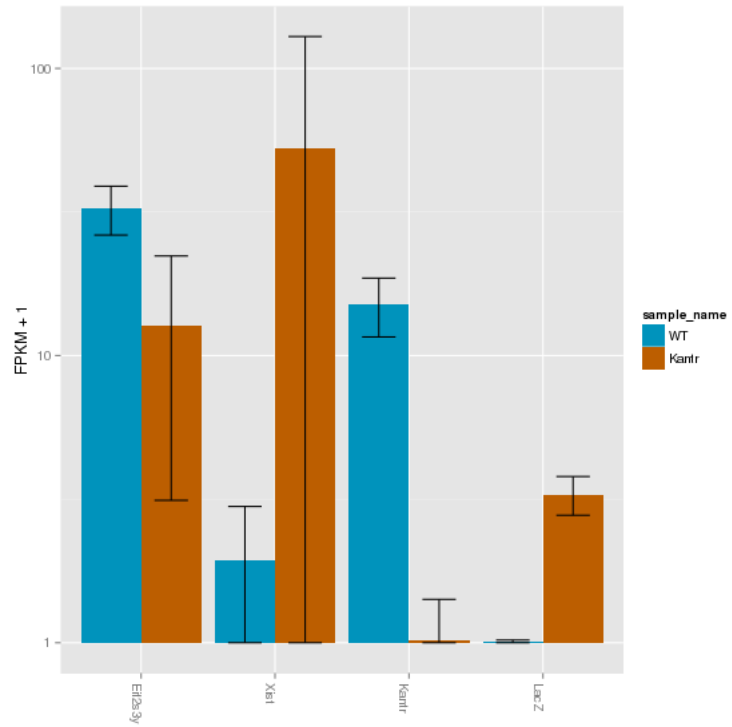

Expression heatmap:

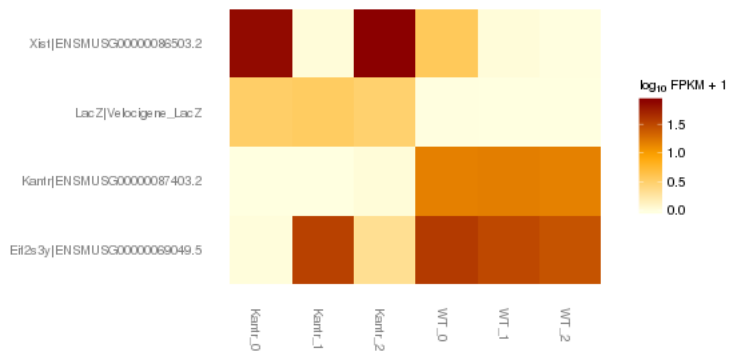

Track visualization

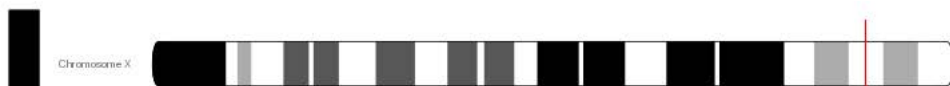

KO Region Kantr\_2 Kantr\_1 Kantr\_0 WT\_2 WT\_1 WT\_0 LincRNA isoforms

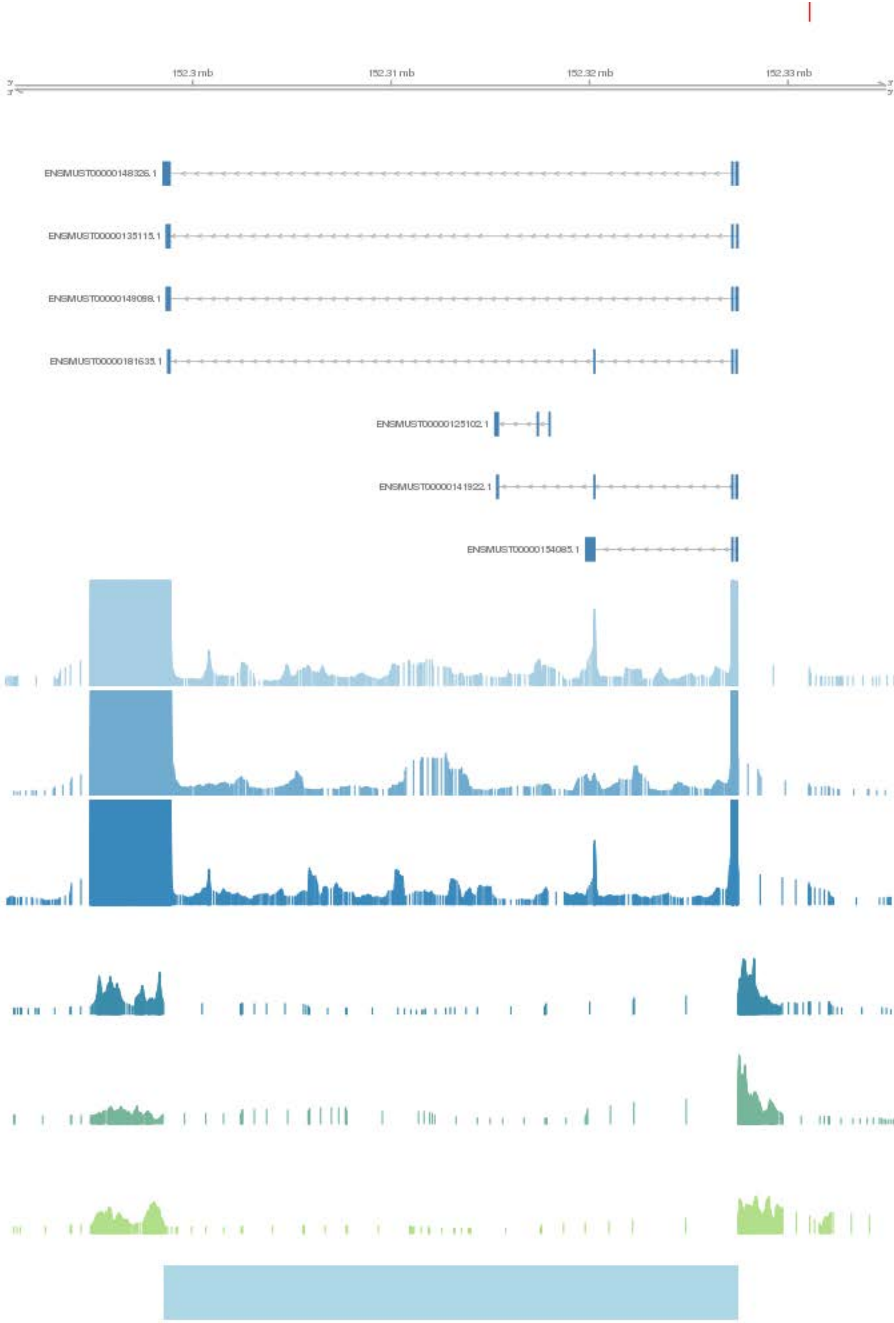

# Differential Analysis

## Differential Genes

There are 315 significantly differentially expressed genes. They are:

|    | geneAnnot\$gene_short_name |
|----|----------------------------|
| 1  | Wnt9a                      |
| 2  | Sox9                       |
| 3  | Il12rb1                    |
| 4  | Mmp14                      |
| 5  | S100a5                     |
| 6  | N4bp3                      |
| 7  | Ramp2                      |
| 8  | Meox1                      |
| 9  | Gramd3                     |
| 10 | Plin4                      |
| 11 | Arrdc2                     |
| 12 | Fosb                       |
| 13 | Hif3a                      |
| 14 | 9330159F19Rik              |
| 15 | Cd33                       |
| 16 | Sh2b2                      |
| 17 | Osgep                      |
| 18 | Bcl2l1                     |
| 19 | Dio2                       |
| 20 | Id3                        |
| 21 | Fgfr1                      |
| 22 | Cd163                      |
| 23 | Derl3                      |
| 24 | Tbx1                       |
| 25 | Gm266                      |
| 26 | Tjap1                      |
| 27 | Trpv4                      |
| 28 | Mertk                      |
| 29 | Gata2                      |
| 30 | Slc25a13                   |
| 31 | Cnksr3                     |
| 32 | Sdc4                       |
| 33 | Rhbdl3                     |
| 34 | Ada                        |
| 35 | ErbB3                      |
| 36 | Ksr1                       |
| 37 | Etnppl                     |

38 Pdk4  
39 Lama4  
40 Arid5b  
41 Sgk1  
42 Ddit4  
43 Cpm  
  
44 Nipal4  
45 Btg2  
46 Gatsl3  
47 Igfbp3  
48 Pomc  
49 Gh  
50 Nfkbia  
51 Zfp3611  
52 Net1  
53 Fos  
54 Dapk1  
55 Elovl7  
56 4930452B06Rik  
57 Fst  
58 Ldb3  
59 Galnt15  
60 Sema3g  
61 Ednrb  
62 Psm5  
63 Fzd6  
64 Fbxo32  
65 Slc38a2  
66 Bcl6  
67 Crebbp  
68 Arc  
69 Nde1  
70 Adamts1  
  
71 Nr4a1  
72 Cdkn1a  
73 Tmem52  
74 Clic5  
75 Trem2  
76 Glo1  
77 Sik1  
78 Xdh  
79 Atp6v0c  
80 Tek14

81 Dusp1  
82 Fkbp5  
83 Nedd4l  
84 Cd74  
85 Pdgfrb  
86 Rab3il1  
87 Fas  
88 Frmd8  
89 Hhex  
90 Atp10a  
91 Kdm5c  
92 Pnpla2  
93 D3Erttd751e  
94 Sgk3  
95 Paqr8  
96 Slc40a1  
97 Il1r1  
  
98 2810459M11Rik  
  
99 Myoc  
100 Lcn2  
101 Col5a1  
102 Depdc7  
103 Dll4  
104 Bpifa1  
105 Fam83d  
106 Anxa5  
107 Exosc9  
108 Dclre1b  
109 Tmem144  
110 Cyr61  
111 Trp53inp1  
112 Gbp3  
113 Gbp2  
114 Nr4a3  
115 Slc44a5  
116 Rps6  
117 Slc2a1  
118 Mfsd2a  
119 Alpl  
120 Tinagl1  
121 Map3k6  
122 Errfi1  
123 Ugt2a1



124 Gbp9  
125 Aff1  
126 Rasgef1b  
127 Bmp3  
128 Rilpl1  
129 Uncx  
130 Lfng  
131 Nfe2l3  
132 Gkn3  
133 Klf15  
134 Lag3  
135 Clec2d  
136 Adipor2  
137 Dusp16  
138 Rhpn2  
139 Sult1a1  
140 Lyve1  
141 Cckbr  
142 Slc38a5  
143 Tsc22d3  
144 Plat  
145 Sall1  
146 Gpt2  
147 Gab1  
148 Mt2  
149 Mt1  
150 Cmtm3  
151 Ets1  
152 Mcam  
153 Ldlr  
  
154 Paqr5  
155 Igdcc3  
156 Heyl  
157 Gng11  
158 Alox12b  
159 Slc16a1  
160 Sox10  
161 Tbc1d4  
162 Tlr13  
163 Ston1  
164 Klf9  
165 Trim36  
166 Neu4

167 Igsf9b  
168 Trim59  
169 Cbl  
170 Pla2g3  
171 Nostrin  
172 Fam214a  
173 Eva1a  
174 Lars2  
175 Tmem98  
176 Prr5  
177 Tmem260  
178 Micall2  
179 Kirrel2  
180 Tenc1  
181 Ppp1r14a  
182 Mxd4  
183 Galnt6  
184 Uvssa  
185 Avp  
186 Dzip11  
187 Egr2  
188 Smim3  
189 Foxf2  
190 Egr1  
191 Olfml2b  
192 Atp5l  
193 Mboat1  
194 Pcsk1n  
195 Tnfrsf10  
196 Hlx  
197 Atp8b1  
198 Zfp189  
199 Gpr37  
200 Spsb1  
201 Gbp5  
202 Rps19  
203 Cables1  
204 Nkx6-2  
205 Cldn5  
206 Syt15  
207 Cdc42ep4  
208 Pkp2  
209 Kihl6

210 Gjc2  
211 Dmrt1  
212 Zfp488  
213 Tlr7  
214 Serpinb1a  
215 Lsm11  
216 Rassf9  
217 S1pr5  
218 Cirbp  
219 Insig1  
220 Zfp36l2  
221 Npas4  
222 Clec14a  
223 Gjb2  
224 Hmga1  
225 Kcne4  
226 Gjb1  
227 Kmt2d  
228 Ccdc6  
229 Dact2  
230 Acap2  
231 Cdc42ep1  
232 Cyp2g1  
233 Rasd1  
234 Opalin  
235 Fzd2  
236 Ppp1r3g  
237 Plekho2  
238 Hs3st1  
239 Olfml1  
240 Lingo3  
241 Islr2  
242 Gfod1  
243 BC068281  
244 Klf13  
245 Hbb-y  
246 Gpr17  
247 Hbb-bs  
248 Nrros  
249 Jun  
250 Junb  
251 Creb5  
252 Ier2

253 Iigp1  
254 Lifr  
255 Lrrc8c  
256 Zcchc24  
257 Per2  
258 S100a9  
259 1810011O10Rik  
  
260 Kdm5d  
261 Chsy3  
262 Sclt1  
263 Fhit  
  
264 Zbtb40  
265 Rpl26  
266 Cox5b  
267 Ksr2  
268 Kdr  
269 D630045J12Rik  
270 Srrm4  
271 Phactr4  
272 Zbtb16  
273 Ppp1r3c  
274 Uty  
275 Il3ra  
276 Ddx3y  
277 Eif2s3y  
278 Ahnak  
279 Hba-a1  
280 1700084C01Rik  
281 Rasgrp3  
282 Jund  
283 Egr4  
284 Ccnb1ip1  
285 Ppp1r3e  
286 Gm7292  
287 H2-BI  
288 H2-Ab1  
289 Tmem88b  
290 Hbb-bt  
291 Plekhf1  
292 Adh1  
293 Sox2  
294 Bpifb4  
295 B3galt5

- 296 Nrarp
- 297 Gm17414
- 298 Gbp4
- 299 Ms4a6c
- 300 Gm15631
- 301 Xist
- 302 BC064078
- 303 Slc5a3
- 304 Apold1
- 305 Sox2ot
- 306 Myl6
- 307 A930018M24Rik
- 308 Neat1
- 309 Gm10406
- 310 Gm7094
- 311 Fam181a
- 312 4732491K20Rik
- 313 Gm26782
- 314 Bin2
- 315 Gm26924

### Matrix of gene significant differences between conditions

(skip for Brainmap wt-v-ko comparisons)

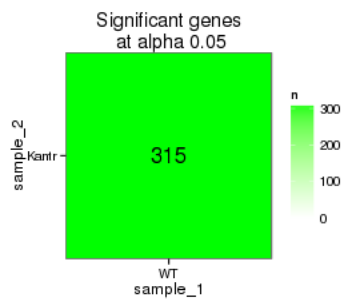

### Significant gene expression differences between conditions

Expression plot (genes):(turned off)

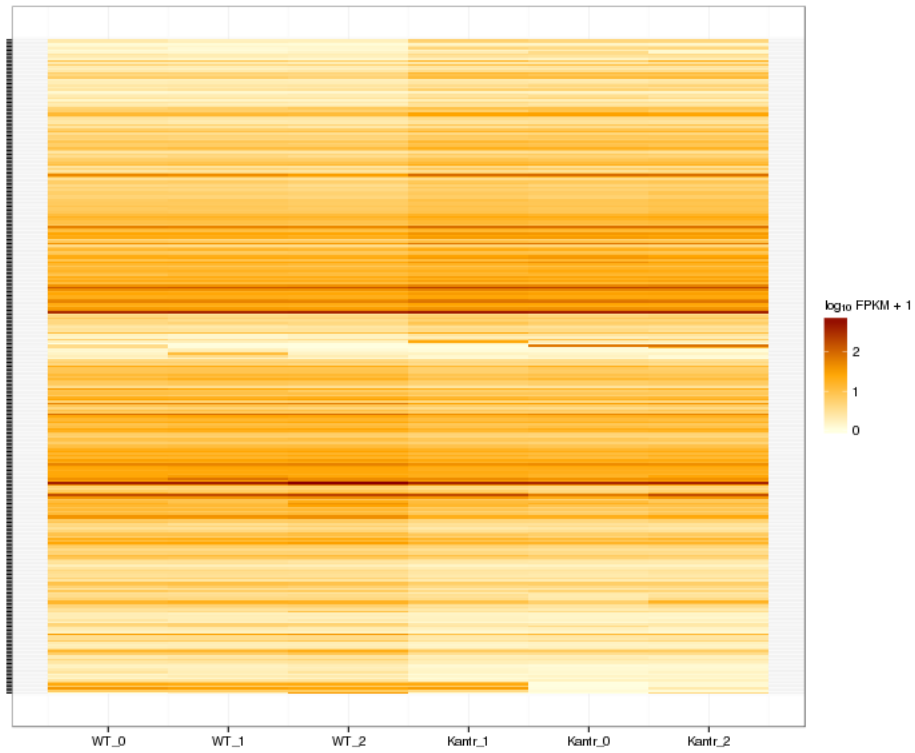

Significant genes with expression >50fpkm (any condition):(turned off)

An individual look at each of the highly expressed significantly differentially regulated genes: (eval=false for first pass)

### Expression-level/significance relationship

Scatter plot of significant genes only:

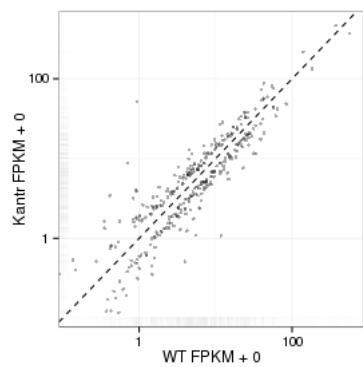

### Volcano Plot

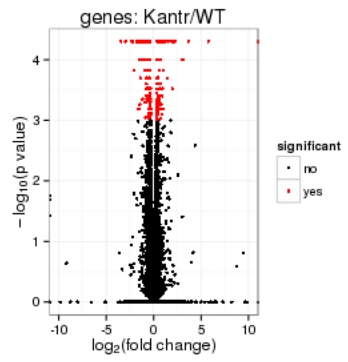

### Volcano plot with significant genes only:

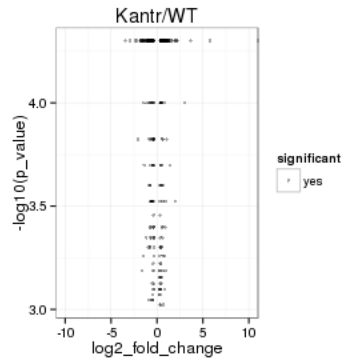

### FoldChange Heatmap

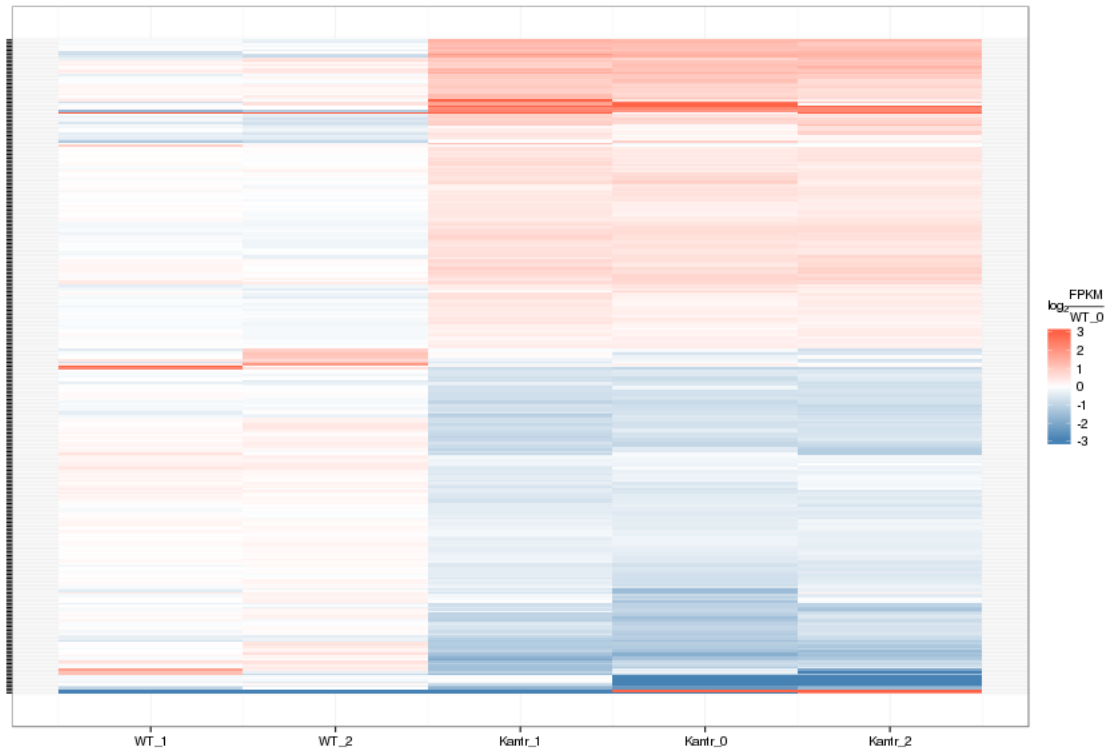

## Differential Splicing

### Differential Isoforms between conditions

Per isoform difference between conditions:

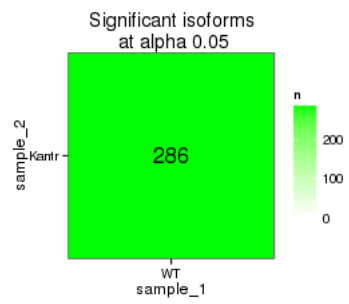



These isoforms are:

| <b>isoAnnot</b> | <b>gene_short_name</b> |
|-----------------|------------------------|
| 1               | Sox9                   |
| 2               | Mmp14                  |
| 3               | N4bp3                  |
| 4               | Gramd3                 |
| 5               | Angptl4                |
| 6               | Slc9a3r2               |
| 7               | Golga2                 |
| 8               | Plin4                  |
| 9               | Arrdc2                 |
| 10              | Fosb                   |
| 11              | Hif3a                  |
| 12              | 9330159F19Rik          |
| 13              | Sh2b2                  |
| 14              | Prlr                   |
| 15              | Cyp2a5                 |
| 16              | Lrrc8a                 |
| 17              | Bcl2l1                 |
| 18              | Dio2                   |
| 19              | Id3                    |
| 20              | Derl3                  |
| 21              | Gm266                  |
| 22              | Med15                  |
| 23              | Tjap1                  |
| 24              | Mertk                  |
| 25              | Slc25a13               |
| 26              | Cnksr3                 |
| 27              | Notch4                 |
| 28              | Camk1g                 |
| 29              | Sdc4                   |
| 30              | Ada                    |
| 31              | ErbB3                  |
| 32              | Ksr1                   |
| 33              | Pdk4                   |
| 34              | Sema6a                 |
| 35              | Lama4                  |
| 36              | Arid5b                 |
| 37              | Sgk1                   |
| 38              | Ddit4                  |
| 39              | Vps54                  |
| 40              | Ddc                    |

41 Cpm  
42 Nipal4  
43 Tns3  
44 Btg2  
45 Gatsl3  
46 Pomc  
47 Pxdn  
48 Gh  
49 Helz  
50 Nfkbia  
51 Zfp36l1  
52 Otub2  
53 Net1  
54 Fos  
55 Zkscan3  
56 Elovl7  
57 4930452B06Rik  
58 Fst  
59 Galnt15  
60 Sema3g  
61 Psmb5  
62 Myo10  
63 Slc38a2  
  
64 Litaf  
  
65 Bcl6  
66 Arc  
67 Adamts1  
68 Slc15a2  
69 Nr4a1  
70 Cdkn1a  
71 Vegfa  
72 Clic5  
73 Glo1  
74 Sik1  
75 Xdh  
76 Atp6v0c  
77 Tekt4  
78 Dusp1  
79 Fkbp5  
80 Sncaip  
81 Pdgrfb  
82 Fas  
83 Frmd8

84 Uhrf2  
85 Hhex  
86 Alas2  
87 Atp10a  
88 Tma16  
89 D3Ertid751e  
90 Sgk3  
91 Paqr8  
92 Slc40a1  
93 Lamc1  
94 Myoc  
95 Lypd6b  
96 Lcn2  
97 Depdc7  
98 Jag1  
99 Dll4  
100 Nkx2-2  
101 Bpifa1  
102 Fam83d  
103 Anxa5  
104 Exosc9  
105 Dclre1b  
106 Fam198b  
107 Alpk1  
108 Cyr61  
109 Gbp2  
110 Nr4a3  
111 Slc2a1  
112 Mfsd2a  
113 Hspg2  
114 Tinagl1  
115 Map3k6  
116 Arhgef19  
117 Errfi1  
118 Ugt2a1  
119 Aff1  
  
120 Rasgef1b  
121 Lfng  
122 Nfe2l3  
123 Gkn3  
124 Klif15  
125 Lag3  
126 Clec2d

127 Adipor2  
128 Dusp16  
129 Slco1a4  
130 Rhpn2  
131 Sult1a1  
132 Disp1  
133 Lyve1  
134 Cckbr  
135 Slc38a5  
136 Col4a5  
137 Mtm1  
138 Tsc22d3  
139 Plat  
140 Sall1  
141 Gpt2  
142 Gab1  
143 Mt2  
144 Mt1  
145 Cmtm3  
146 Ets1  
147 Ldlr  
148 Heyl  
149 Gng11  
150 Alox12b  
151 Rnft2  
152 Slc16a1  
153 Sox10  
154 Tbc1d4  
155 Ucp2  
156 Klf9  
157 Trim36  
158 Igsf9b  
159 Trim59  
160 Nostrin  
161 Eva1a  
162 Lars2  
163 Tmem98  
164 Prr5  
165 Tmem260  
166 Micall2  
167 Kirrel2  
168 Ppp1r14a  
169 Mxd4  
170 4932438A13Rik

171 Ovol2  
172 Avp  
173 Egr2  
174 Sh3rf3  
  
175 Smim3  
176 Galnt11  
177 Foxf2  
178 Egr1  
179 Olfml2b  
180 Atp5l  
181 Mboat1  
182 Pcsk1n  
183 Tnfsf10  
184 Atp8b1  
185 Zfp189  
186 Cercam  
187 Gpr37  
188 Spsb1  
189 Gjb6  
190 Gbp5  
191 Erf  
192 Cables1  
193 Nkx6-2  
194 Cldn5  
195 Syt15  
196 Sdk2  
197 Cdc42ep4  
198 Pkp2  
199 Greb1l  
200 Aplnr  
201 Zfp488  
202 Tlr7  
203 Serpinb1a  
204 Rassf9  
205 Cirbp  
206 Insig1  
207 Zfp36l2  
208 Npas4  
209 Clec14a  
210 Gjb2  
211 Kcne4  
212 Gjb1  
213 Kmt2d

214 Ranbp3l  
215 Ccdc6  
216 Dact2  
217 Acap2  
218 Cdc42ep1  
219 Rasd1  
220 Opalin  
221 Fzd2  
222 Ppp1r3g  
223 Plekho2  
224 Olfml1  
225 Klf13  
  
226 Hbb-y  
227 Gpr17  
228 Hbb-bs  
229 Junb  
  
230 Creb5  
231 Ier2  
232 Lifr  
233 Lrrc8c  
234 Wdr86  
235 Per2  
236 Pla2g4a  
237 Ncoa4  
238 1810011O10Rik  
239 Kdm5d  
240 Chsy3  
241 Calcr1  
242 Zbtb40  
243 Rpl26  
244 Cxcl12  
245 Cox5b  
246 Kdr  
247 Hspb11  
248 Slc22a8  
249 Srrm4  
250 Zfp428  
251 Cntn4  
252 Zbtb16  
253 Ppp1r3c  
254 Ddx3y  
255 Ahnak  
256 170084C01Rik

257 Jund  
258 Egr4  
259 Ccnb1ip1  
260 Ppp1r3e  
261 Gm7292  
262 H2-BI  
263 Tmem88b  
264 Hbb-bt  
265 Plekhf1  
266 Adh1  
267 B3galt5  
268 Nrarp  
269 Aoc2  
270 Gm3411  
271 Nhs12  
272 Gm15631  
273 Xist  
274 BC064078  
275 Apold1  
276 Sox2ot  
277 Myl6  
278 Neat1  
279 Malat1  
  
280 Gm21092  
281 Gm7094  
282 Fam181a  
283 Gm26782  
284 Bin2  
  
285 Gm26924

Gene-level DE isoform heatmap

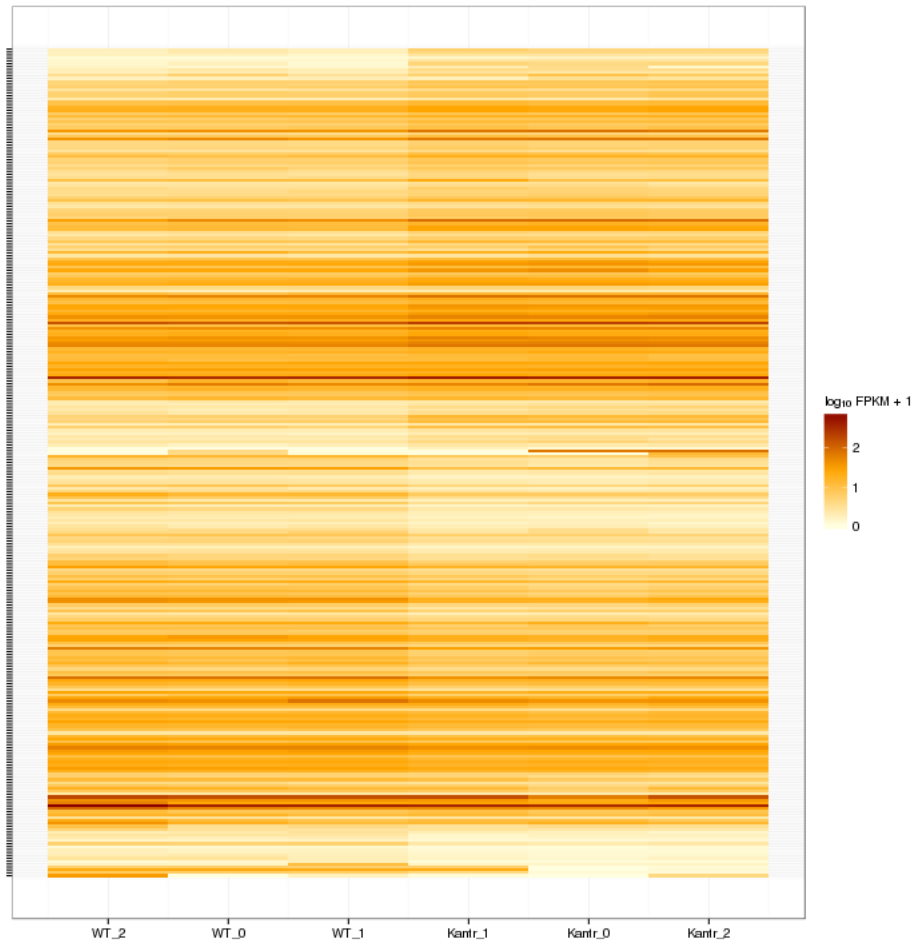

Isoform foldchange heatmap by isoform:



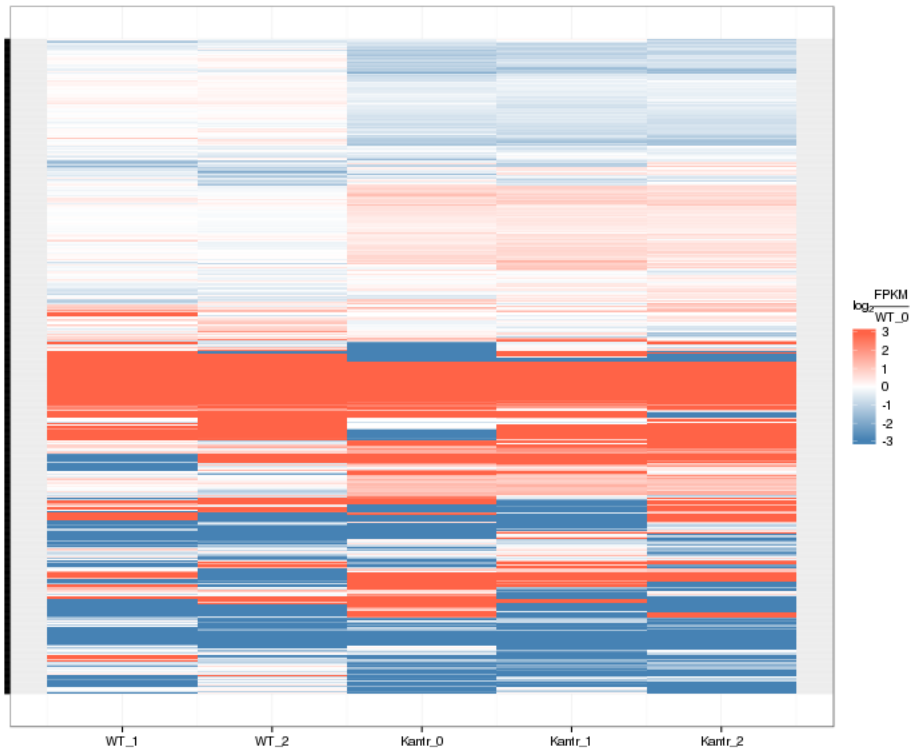

## Differential Splicing between conditions

(eval false for first pass)

Per condition differences in isoforms (Does gene have diff piechart between conditions?)

These genes are:

Splicing heatmap by isoform:

Splicing heatmap by gene

The following are significantly differentially spliced genes (relative portion of isoform per condition):

## Gene/Pathway Analysis

### GSEA

Enrichment and zscores are calculated based on expression in KO vs WT ( $\text{fpkmKO}/\text{fpkmWT}$ ), so genes that are down regulated in KO are shown in blue, while upregulation is shown in red.

KOWT Blue = down in KO Red = Up in KO

Biocarta enrichment:

```
## Error: `x` must have at least 2 rows and 2 columns
```

Biocarta zscore:

```
## Error: incorrect number of dimensions
```

```
## Error: object 'x_ordered' not found
```

```
## Error: error in evaluating the argument 'x' in selecting a method for function 'as.matrix': Error: object 'x_ordered' not found
```

```
## Error: object 'x_ordered' not found
```

Reactome enrichment:

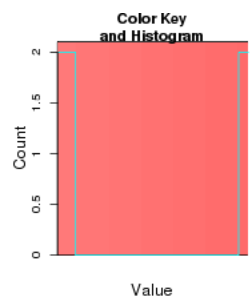

\_\_\_\_\_

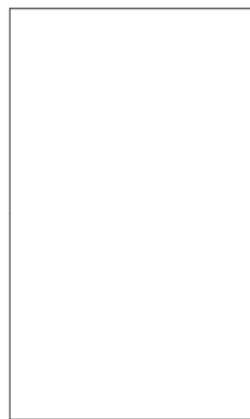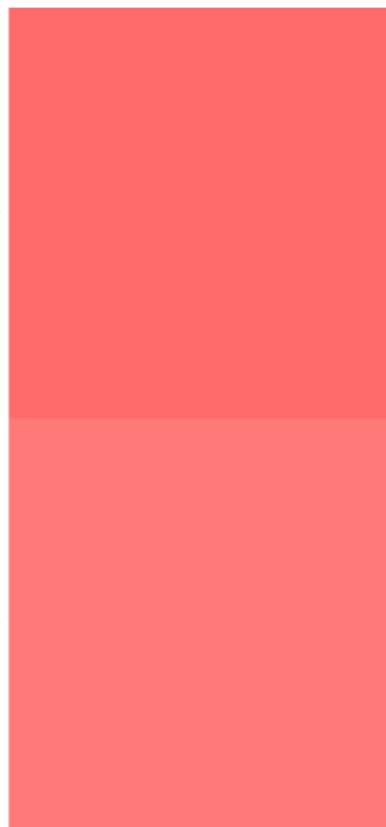

REACTOME\_SIGNALING\_BY\_PDGF

REACTOME\_AXON\_GUIDANCE

Reactome zscore:

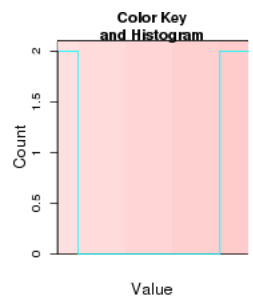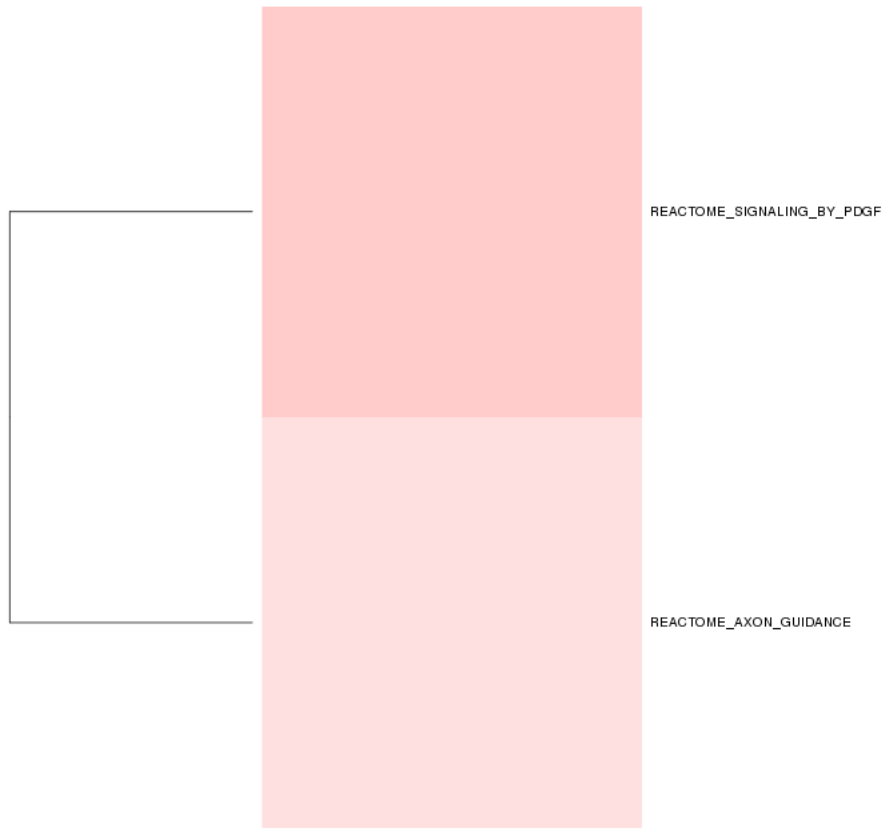

Kegg enrichment:

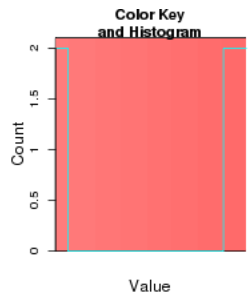

\_\_\_\_\_

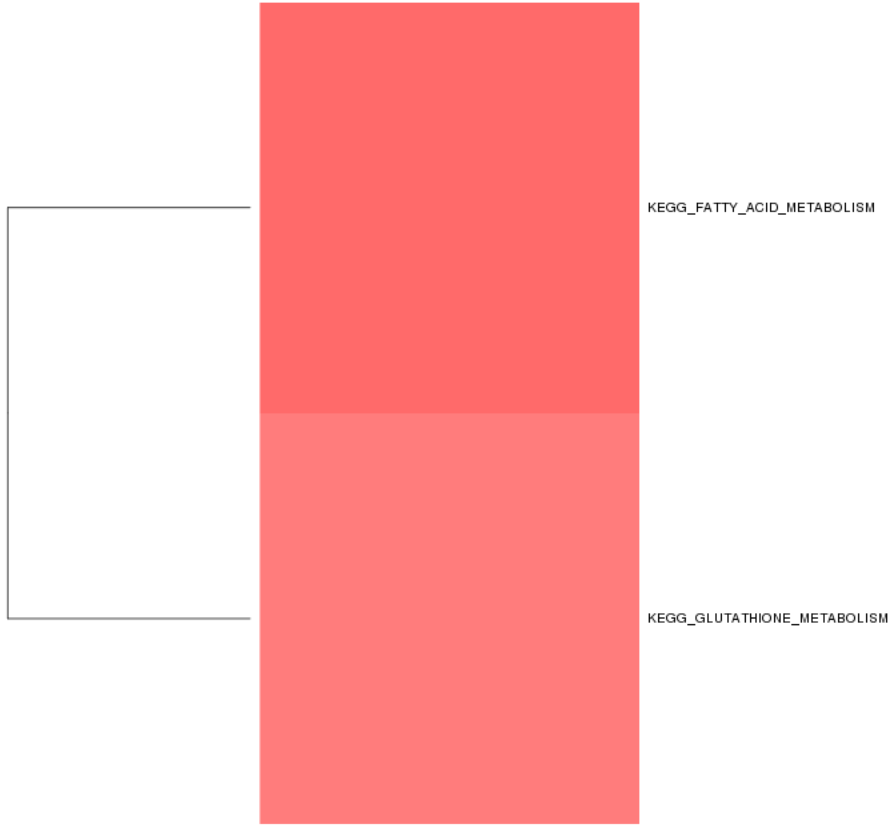

Kegg zscore:

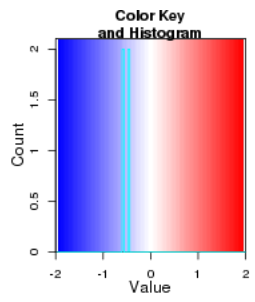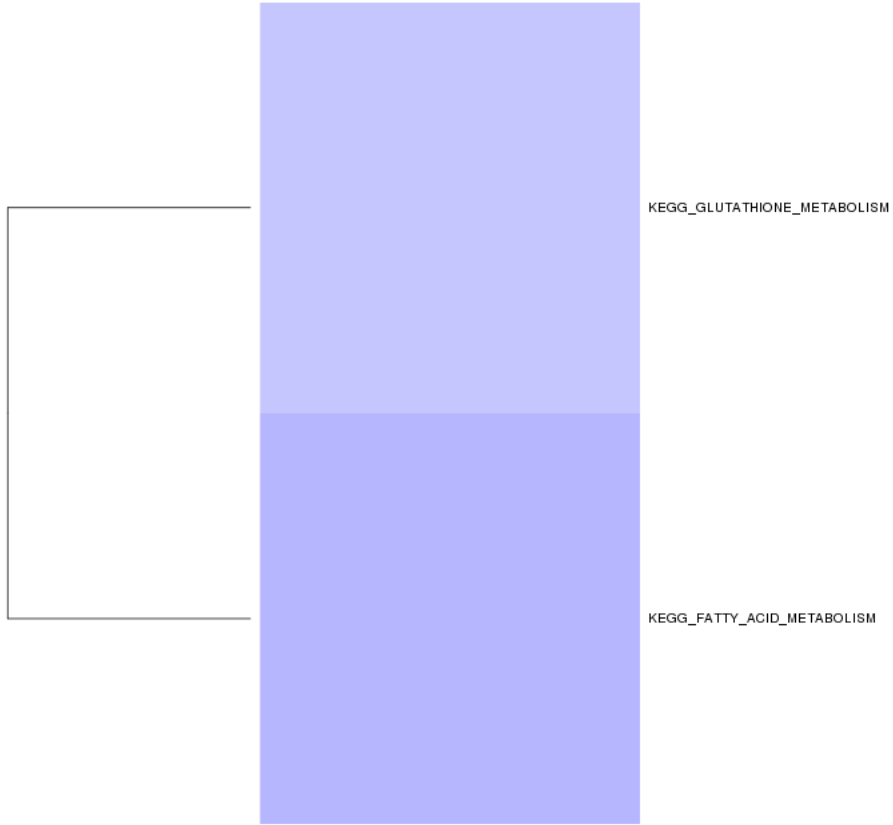

Interneuron enrichment:

```
## Error: no locations are finite
```



5HT\_genes

Lhx6\_genes

Interneuron zscore:

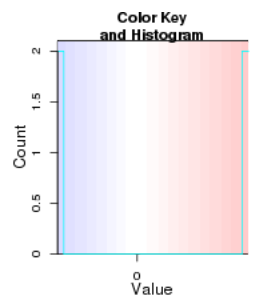

\_\_\_\_\_

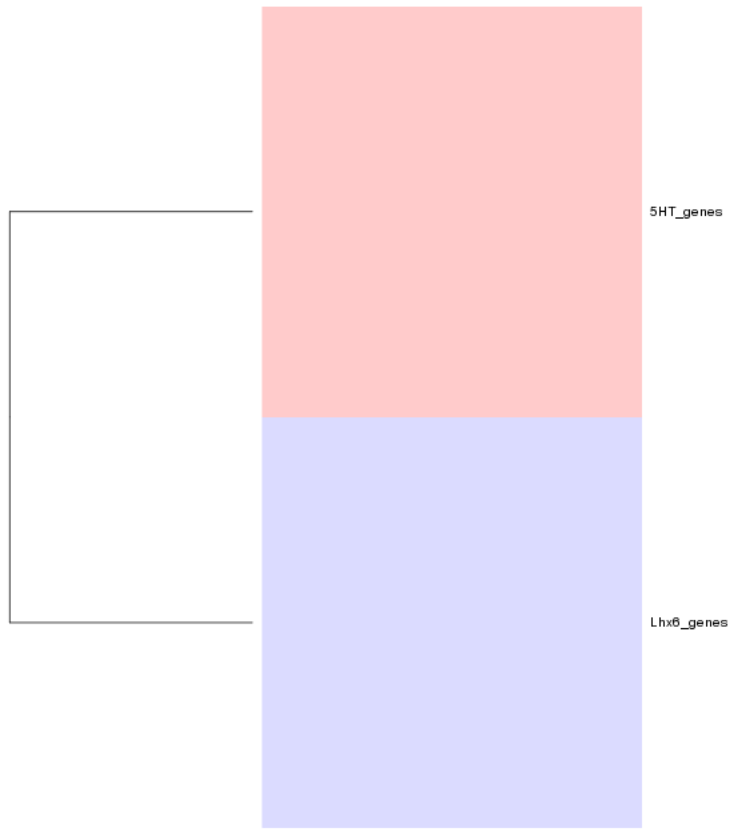

Oncogene enrichment:

```
## Error: argument is of length zero
```

Oncogene zscore:

```
## Error: incorrect number of dimensions
```



```
## Error: object 'x_ordered' not found
```

```
## Error: error in evaluating the argument 'x' in selecting a method for function 'as.matrix': Error: object 'x_ordered' not found
```

```
## Error: object 'x_ordered' not found
```

Immuno enrichment:

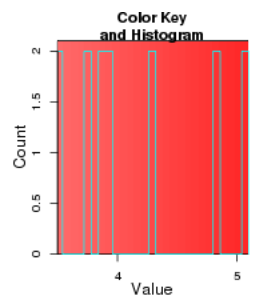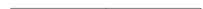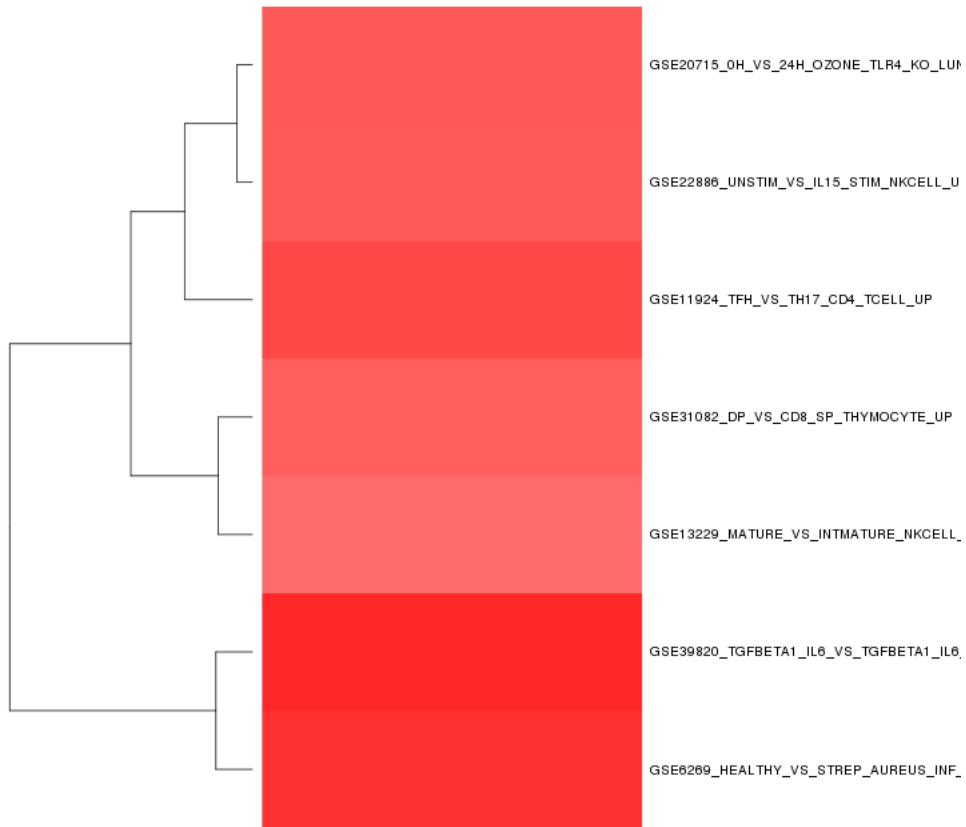

Immuno zscore:

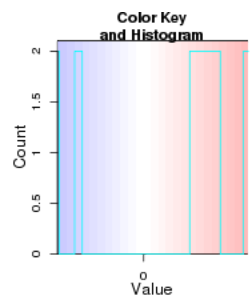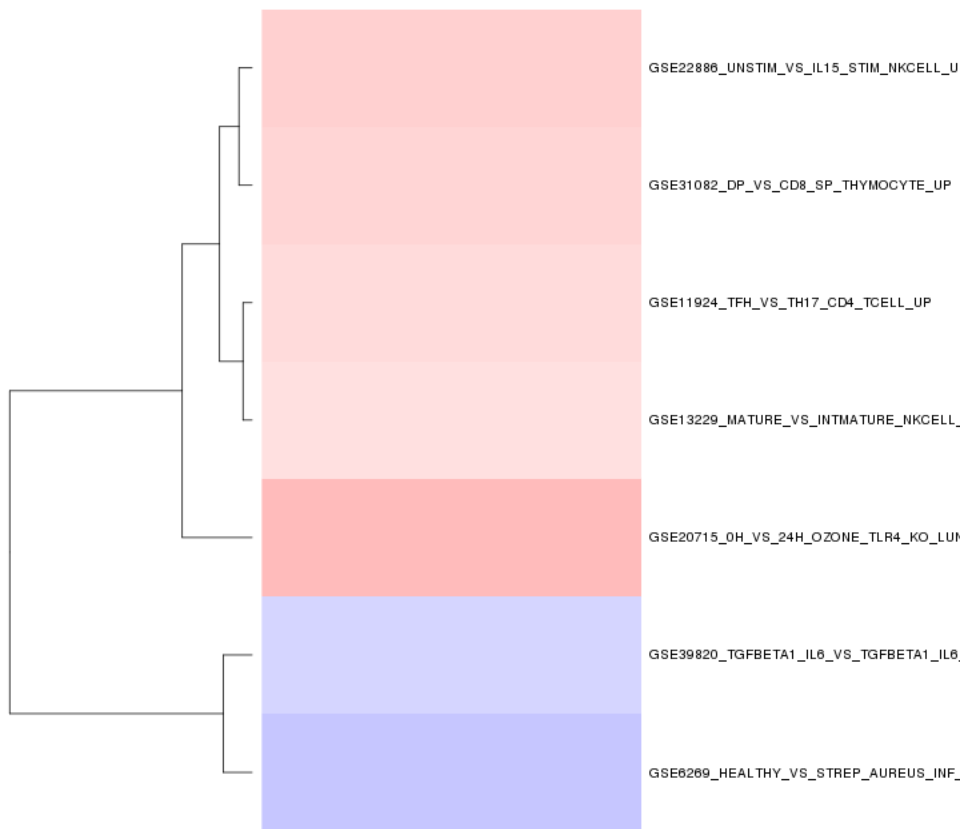

TF enrichment:

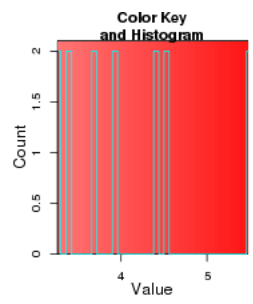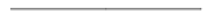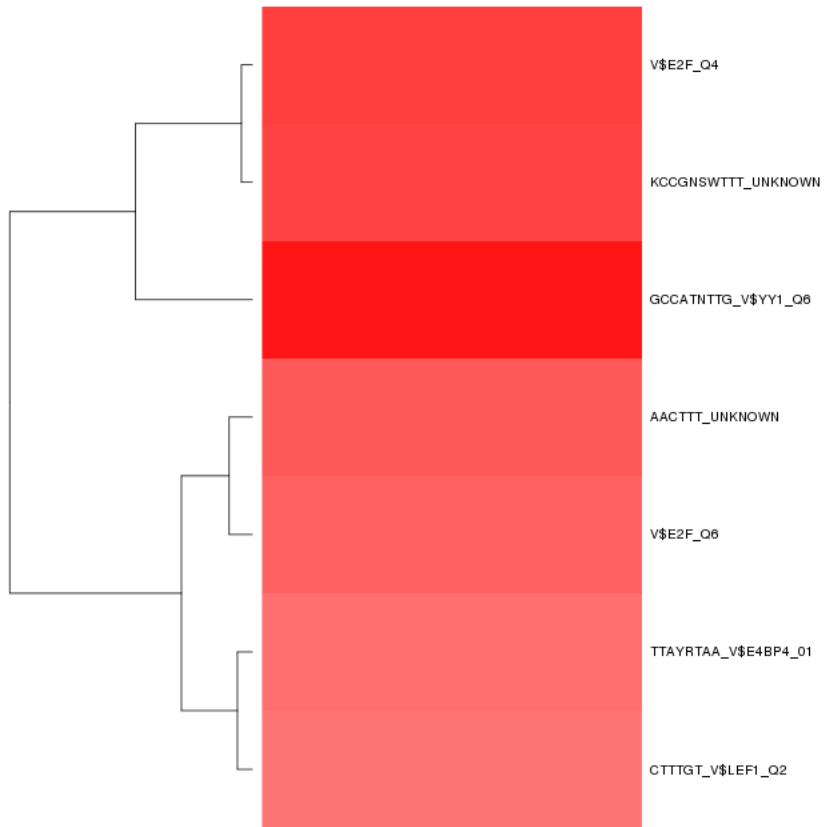

TF zscore:

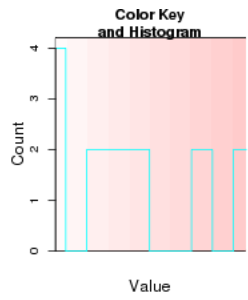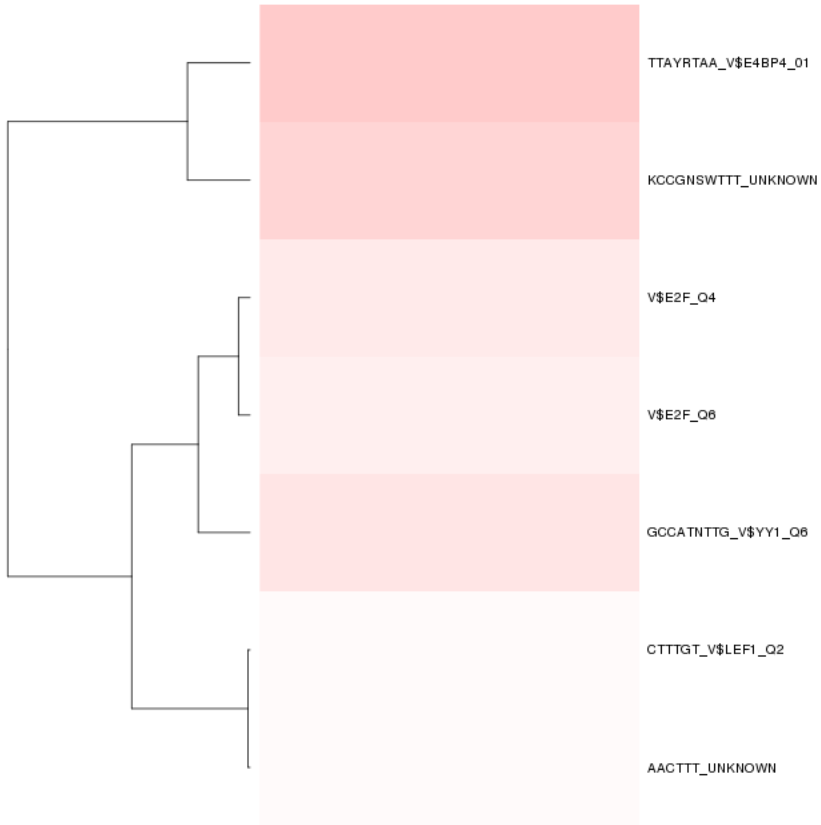

## GO enrichment

Cluster profiler used to call enrichments of significantly differentially regulated genes that map to Entrez IDs.



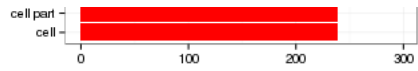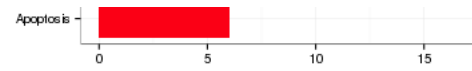

```
## Error: 'x' and 'units' must have length > 0
```

## Enrichment or depletion for stage-specific cell cycle markers





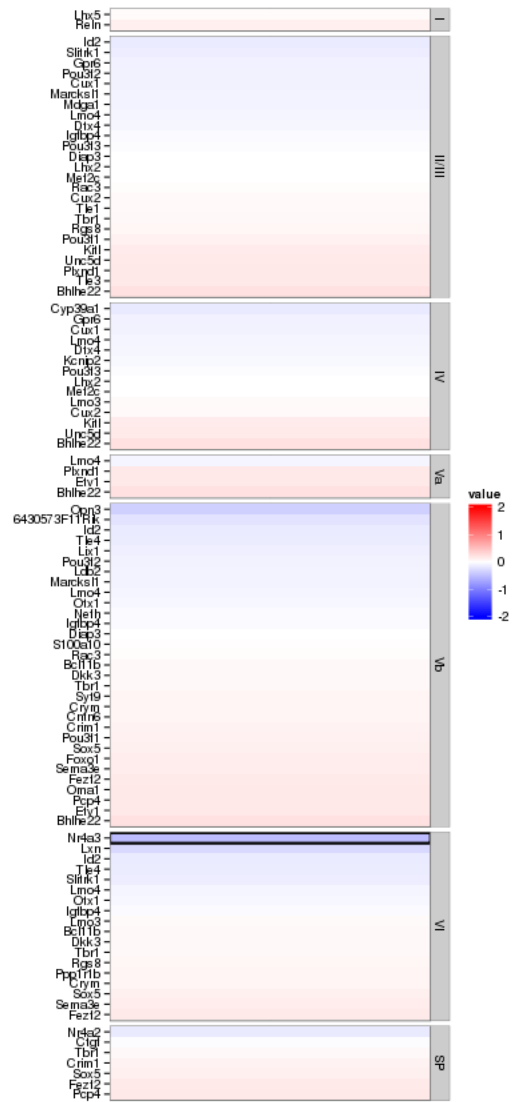

Enrichment or depletion for specific neural cell types

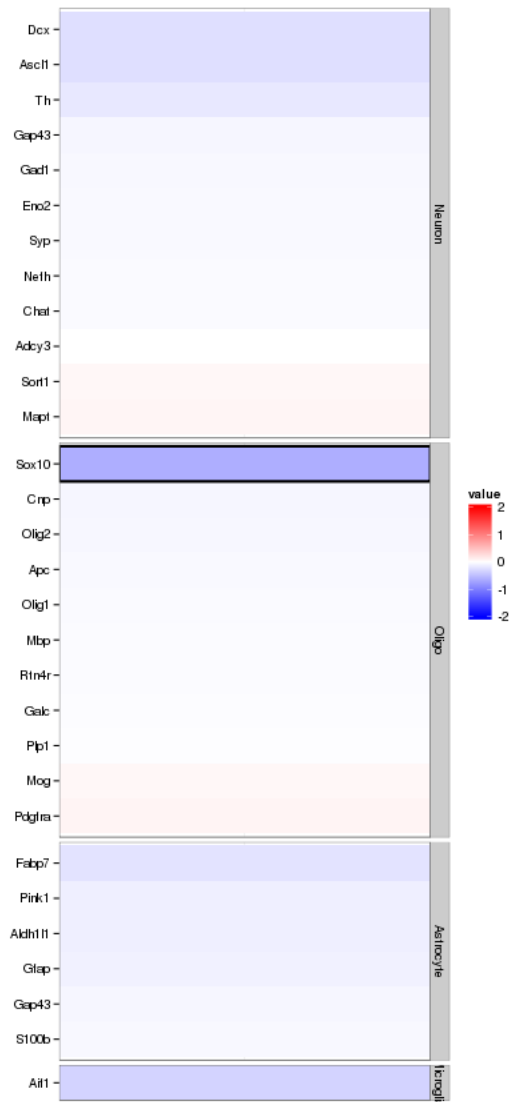

**Enrichment or Depletion of neural differentiation markers**

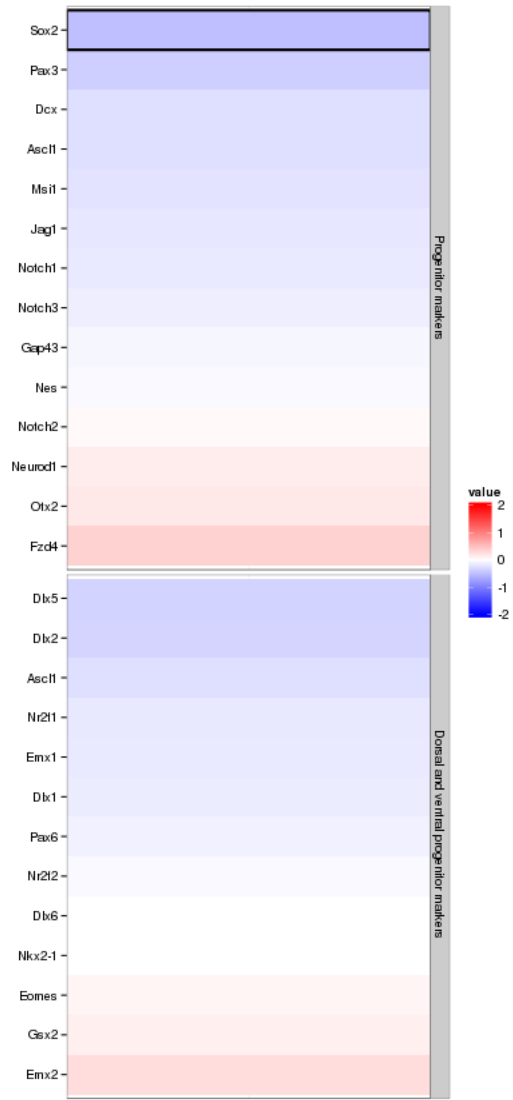

## Cis vs Trans (locally)

log2 Foldchange and test statistic are calculated with the ratio of fpkm(KO)/fpkm(WT), thus the test\_stat is positive if a gene is higher in the KO and negative if a gene has lower expression in the KO

The pvalue for 1 genes significantly regulated in a region this size is: 0.4783

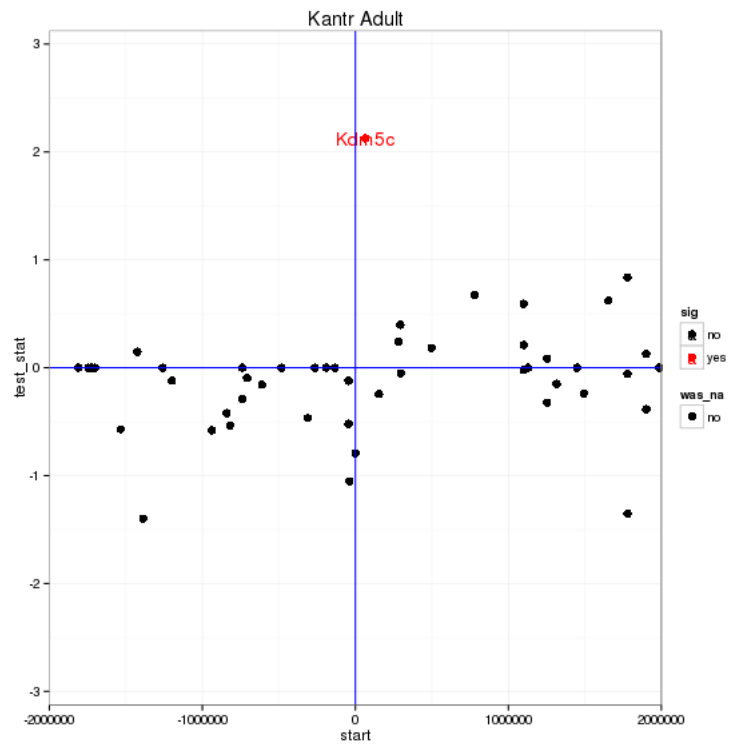

## Notes

Samples used are:

10

- 1 JR824
- 2 JR820
- 3 JR821
- 4 JR742
- 5 JR819
- 6 JR823

## Replicates

| file                                                                        | sample_name | replicate | rep_name | total_mass  | norm_mass   | internal_scale | external_scale |
|-----------------------------------------------------------------------------|-------------|-----------|----------|-------------|-------------|----------------|----------------|
| 1 /n/rinn_data1/seq/loff/Projects/BrainMap/data/quants/JR824/abundances.cxb | WT          | 0         | WT_0     | 34306900.00 | 36012300.00 | 0.96           | 1.00           |
| 2 /n/rinn_data1/seq/loff/Projects/BrainMap/data/quants/JR820/abundances.cxb | WT          | 1         | WT_1     | 36256500.00 | 36012300.00 | 1.01           | 1.00           |
| 3 /n/rinn_data1/seq/loff/Projects/BrainMap/data/quants/JR821/abundances.cxb | WT          | 2         | WT_2     | 45848800.00 | 36012300.00 | 1.29           | 1.00           |
| 4 /n/rinn_data1/seq/loff/Projects/BrainMap/data/quants/JR742/abundances.cxb | Kantr       | 0         | Kantr_0  | 35615300.00 | 36012300.00 | 0.98           | 1.00           |

```
5 /n/rinn_data1/seq/Igoff/Projects/BrainMap/data/quants/JR819/abundances.cxb Kantr
6 /n/rinn_data1/seq/Igoff/Projects/BrainMap/data/quants/JR823/abundances.cxb Kantr
```

```
1 Kantr_1 32408700.00 36012300.00 0.89 1.00
2 Kantr_2 33428000.00 36012300.00 0.92 1.00
```

## Session Info

```
## R version 3.0.2 (2013-09-25)
## Platform: x86_64-unknown-linux-gnu (64-bit)
##
## locale:
## [1] LC_CTYPE=en_US.UTF-8      LC_NUMERIC=C
## [3] LC_TIME=en_US.UTF-8       LC_COLLATE=en_US.UTF-8
## [5] LC_MONETARY=en_US.UTF-8   LC_MESSAGES=en_US.UTF-8
## [7] LC_PAPER=en_US.UTF-8     LC_NAME=C
## [9] LC_ADDRESS=C              LC_TELEPHONE=C
## [11] LC_MEASUREMENT=en_US.UTF-8 LC_IDENTIFICATION=C
##
## attached base packages:
## [1] grid      parallel  methods  stats    graphics grDevices utils
## [8] datasets base
##
## other attached packages:
## [1] plyr_1.8.1
## [2] stringr_0.6.2
## [3] seqbias_1.10.0
## [4] BSgenome.Mmusculus.UCSC.mm10_1.3.19
## [5] BSgenome_1.30.0
## [6] Biostrings_2.30.1
## [7] gdata_2.13.3
## [8] GO.db_2.10.1
## [9] org.Mm.eg.db_2.10.1
## [10] clusterProfiler_1.13.1
## [11] DOSE_2.0.0
## [12] ReactomePA_1.6.1
## [13] AnnotationDbi_1.24.0
## [14] Biobase_2.22.0
## [15] mgcv_1.7-29
## [16] nlme_3.1-117
## [17] RMySQL_0.9-3
## [18] RColorBrewer_1.0-5
## [19] gridExtra_0.9.1
## [20] gtable_0.1.2
## [21] marray_1.40.0
## [22] gplots_2.13.0
## [23] GSA_1.03
## [24] limma_3.18.13
## [25] xtable_1.7-3
## [26] cummeRbund_2.7.2
## [27] Gviz_1.6.0
## [28] rtracklayer_1.22.7
## [29] GenomicRanges_1.14.4
## [30] XVector_0.2.0
```

```

## [31] IRanges_1.20.7
## [32] fastcluster_1.1.13
## [33] reshape2_1.4
## [34] ggplot2_1.0.0
## [35] RSQLite_0.11.4
## [36] DBI_0.2-7
## [37] BiocGenerics_0.8.0
## [38] knitr_1.6
##
## loaded via a namespace (and not attached):
## [1] biomaRT_2.18.0      biovizBase_1.10.8  bitops_1.0-6
## [4] caTools_1.17        cluster_1.15.2      colorspace_1.2-4
## [7] dichromat_2.0-0     digest_0.6.4        DO.db_2.7
## [10] evaluate_0.5.5      formatR_0.10        Formula_1.1-1
## [13] GenomicFeatures_1.14.5 GOsemSim_1.20.3     graph_1.40.1
## [16] graphite_1.8.1      gtools_3.4.1        Hmisc_3.14-4
## [19] igraph_0.7.1        KEGG.db_2.10.1     KernSmooth_2.23-12
## [22] labeling_0.2        lattice_0.20-29     latticeExtra_0.6-26
## [25] MASS_7.3-33         Matrix_1.1-3        munsell_0.4.2
## [28] org.Hs.eg.db_2.10.1 proto_0.3-10        qvalue_1.36.0
## [31] Rcpp_0.11.2         RCurl_1.95-4.1     reactome.db_1.46.1
## [34] Rsamtools_1.14.3    scales_0.2.4        splines_3.0.2
## [37] stats4_3.0.2        survival_2.37-7    tcltk_3.0.2
## [40] tools_3.0.2         XML_3.98-1.1       zlibbioc_1.8.0

```

## Run Info

```

##      param
## 1    cmd_line
## 2    version
## 3  SVN_revision
## 4  boost_version
## 5    genome
##
## 1 cuffdiff -p 10 -L WT,Kantr -o /n/rinn_data1/seq/lgoff/Projects/BrainMap/data/diffs/Kantr_vs_WT_Adult /n/rinn_data1/seq/lgoff/Projects/BrainMap/data/ar
## 2
## 3
## 4
## 5

```

# Kantr KO vs WT (Embryonic)

This file shows the wt-v-ko comparison for Kantr.

Cuff overview:

```
## CuffSet instance with:  
## 2 samples  
## 26754 genes  
## 77524 isoforms  
## 0 TSS  
## 23066 CDS  
## 0 promoters  
## 0 splicing  
## 19954 relCDS
```

## QC

### Dispersion

Dispersion plot for genes in cuff: (Overdispersion can lead to innacurate quants)

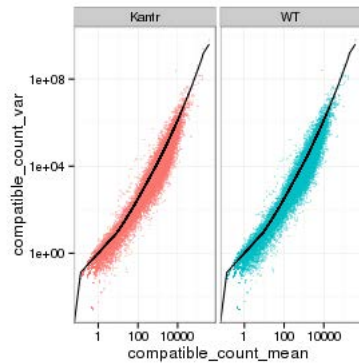

### Cross-replicate variability (fpkmSCVplot)

Differences in CV 2 can result in lower numbers of differentially expressed genes due to a higher degree of variability between replicate fpkm estimates.

Genes:

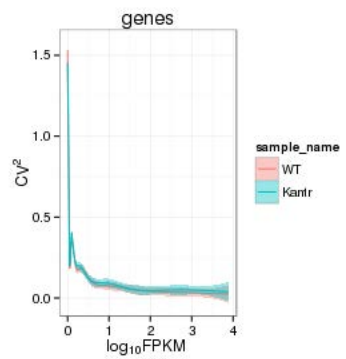

Isoforms:

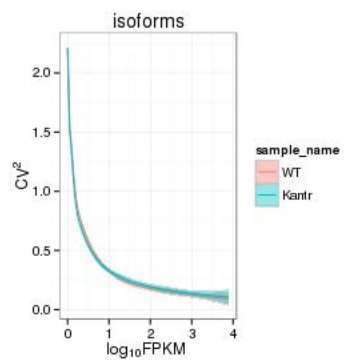

## MvA plot

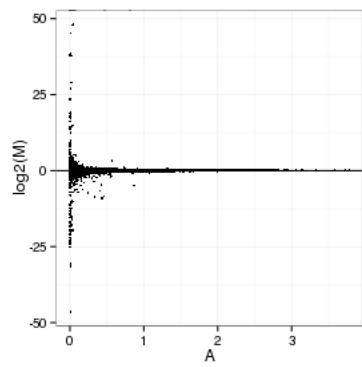

MvA plot counts



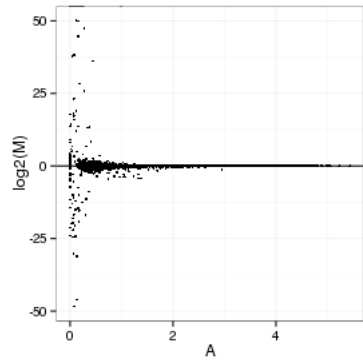

## Scatterplot matrix

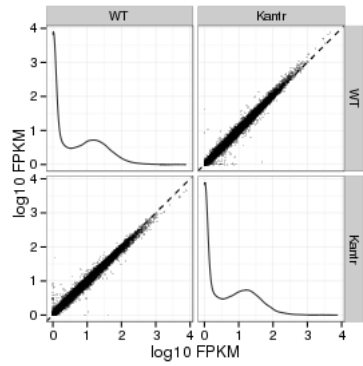

## Distributions

### Boxplots

Boxplot (genes)

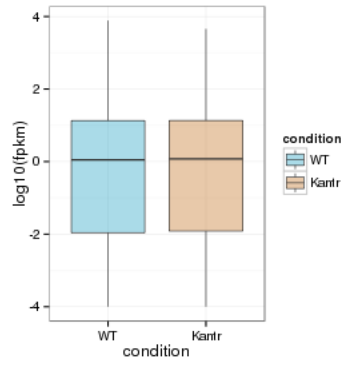

Boxplot (genes, replicates)

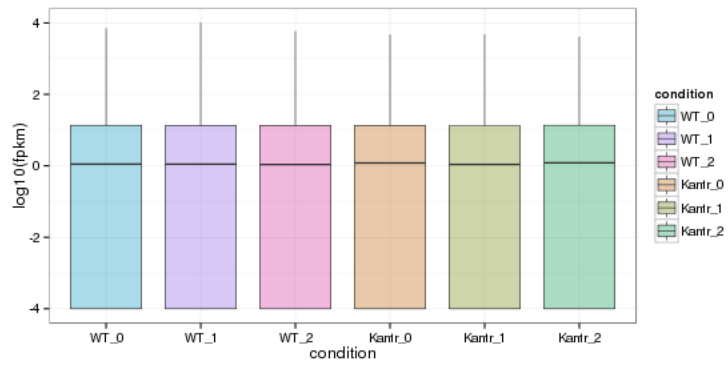

Boxplot (isoforms)

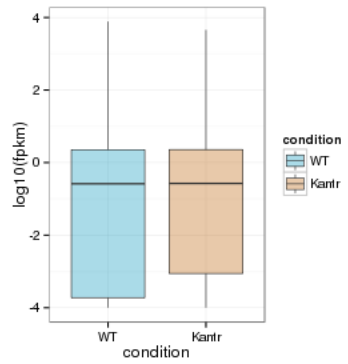

Boxplot (isoforms, replicates)

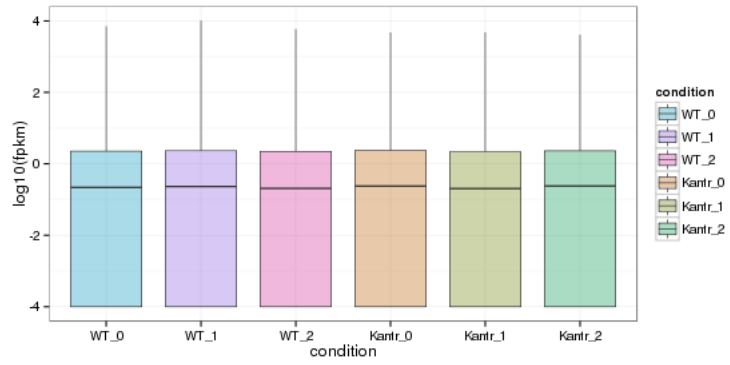

## Density

Density (genes)

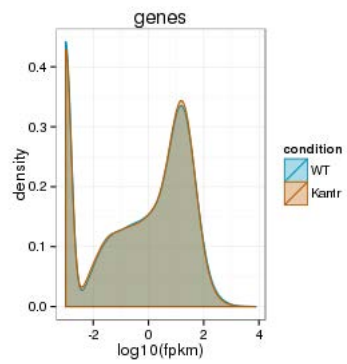

Density (genes, replicates)

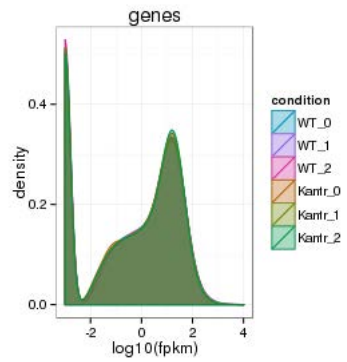

# Clustering

## Replicate Clusters

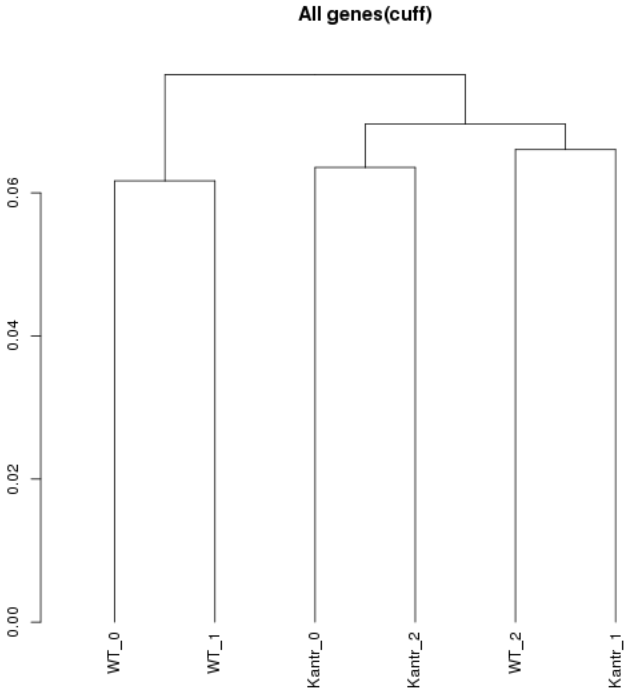

## NULL

## PCA (genes)

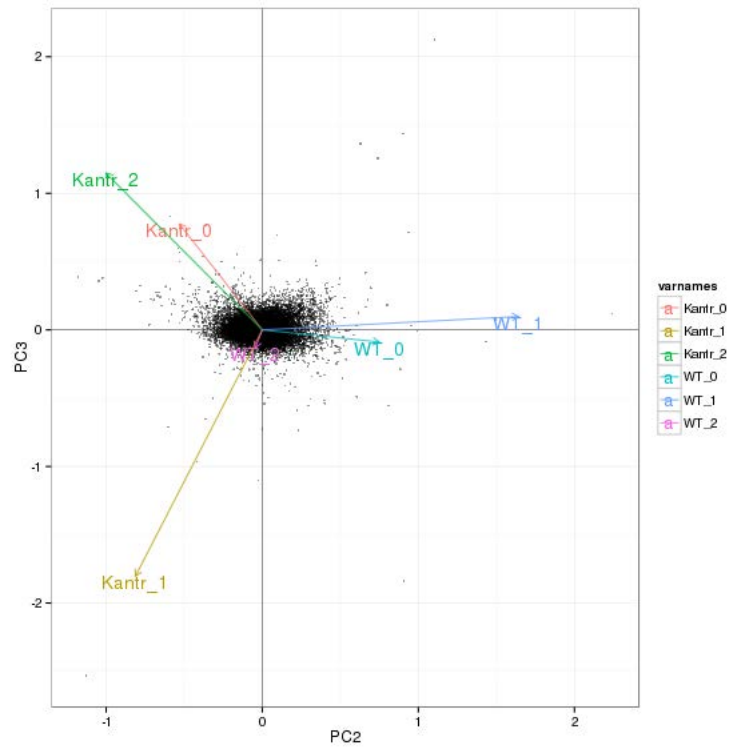

**MDS (genes)**

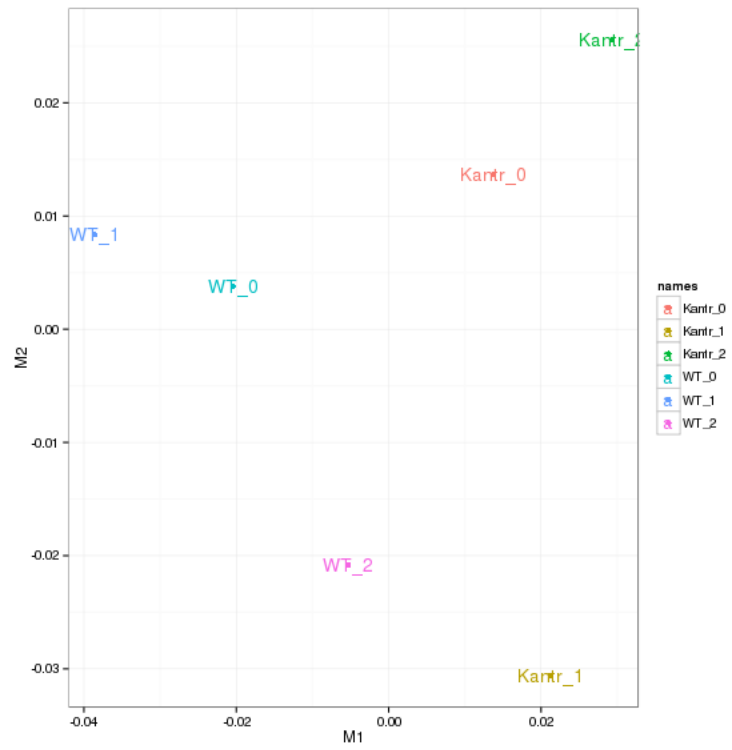

## KO assessment

Endogenous lncRNA expression

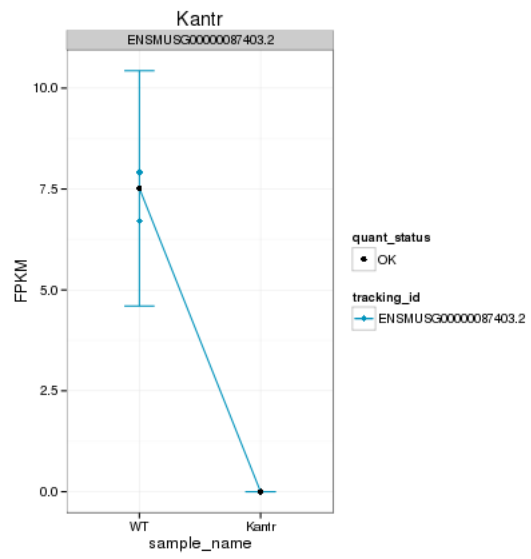

Endogenous expression of Kantr isoforms:

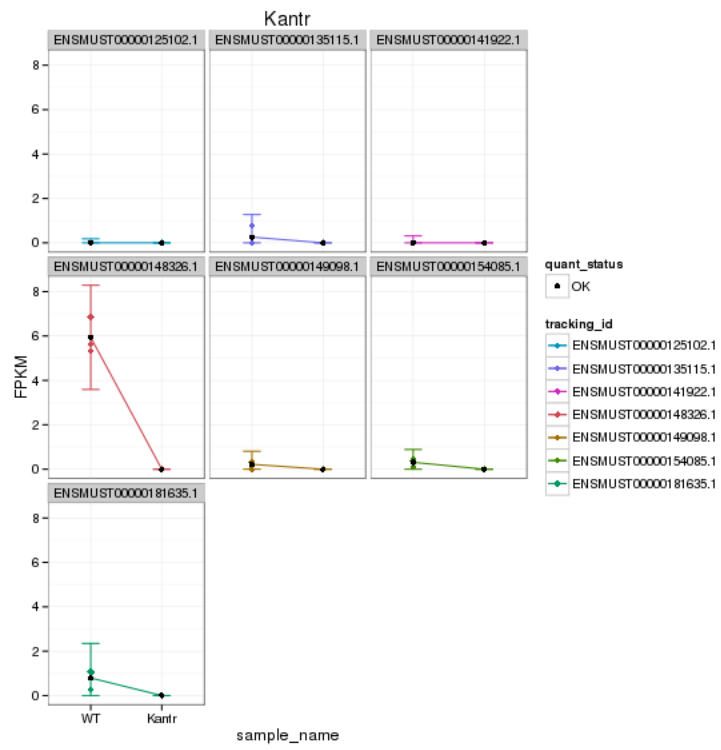

Barplot of gene expression:



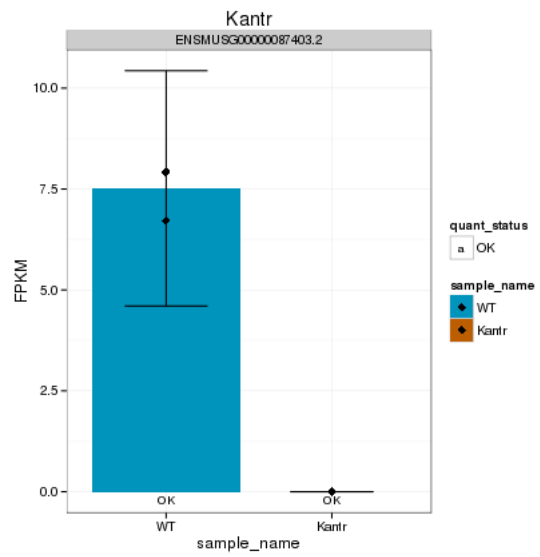

Barplot of isoform expression:

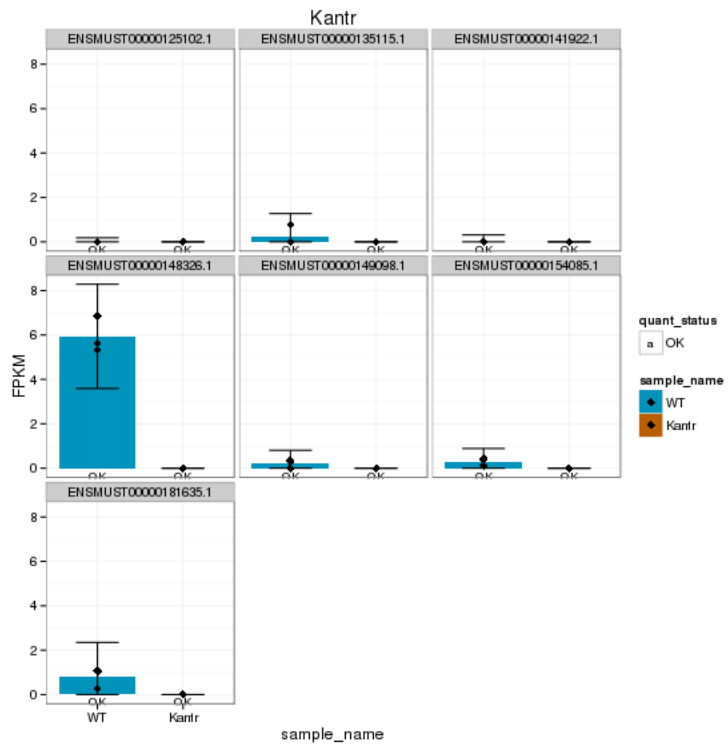

## LacZ expression

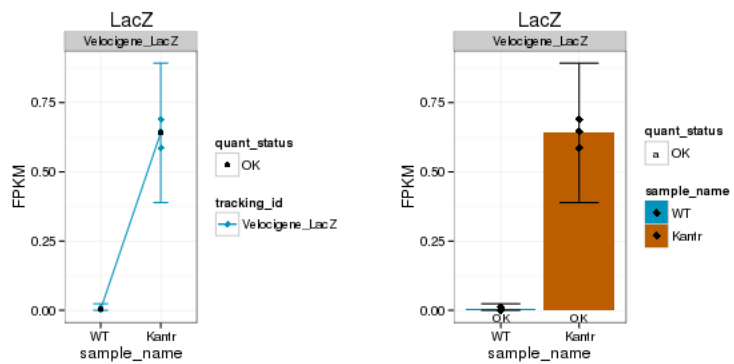

## Digital Genotyping (LacZ vs Endogenous lincRNA and Sex)

Eif2s3y is a y-expressed gene, Xist is an x-expressed gene Expression plot (endogenous linc, lacZ, Y-expressed gene):

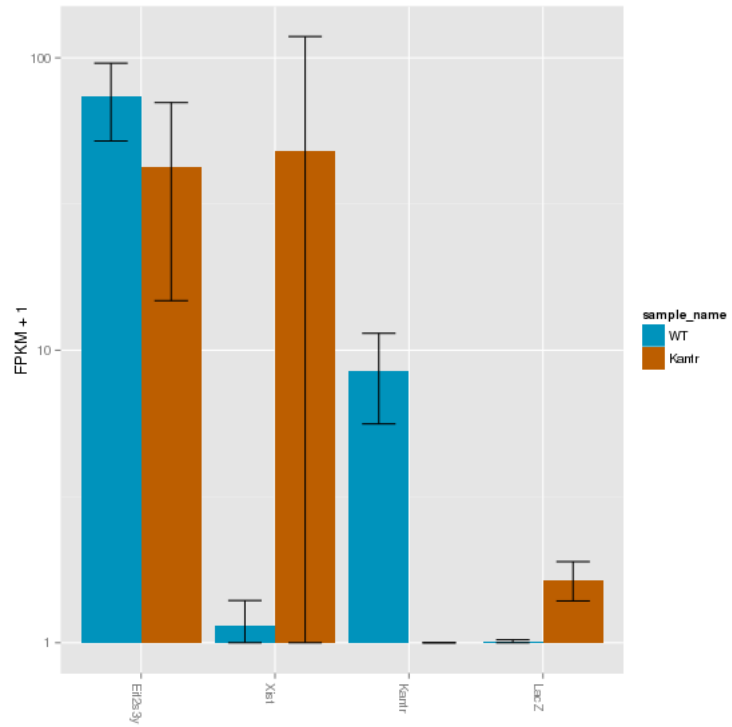

Expression heatmap:

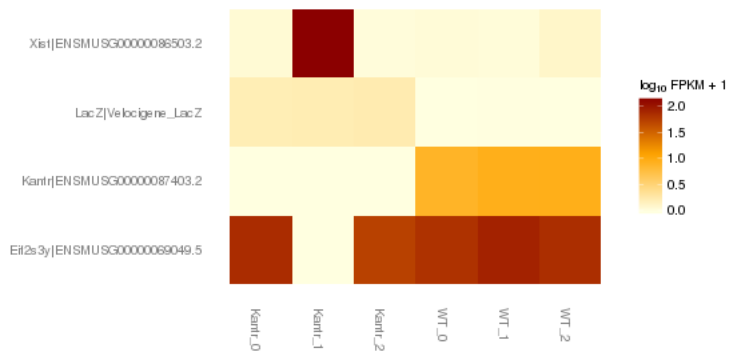

Track visualization



KO Region Kantr\_2 Kantr\_1 Kantr\_0 WT\_2 WT\_1 WT\_0 LincRNA isoforms

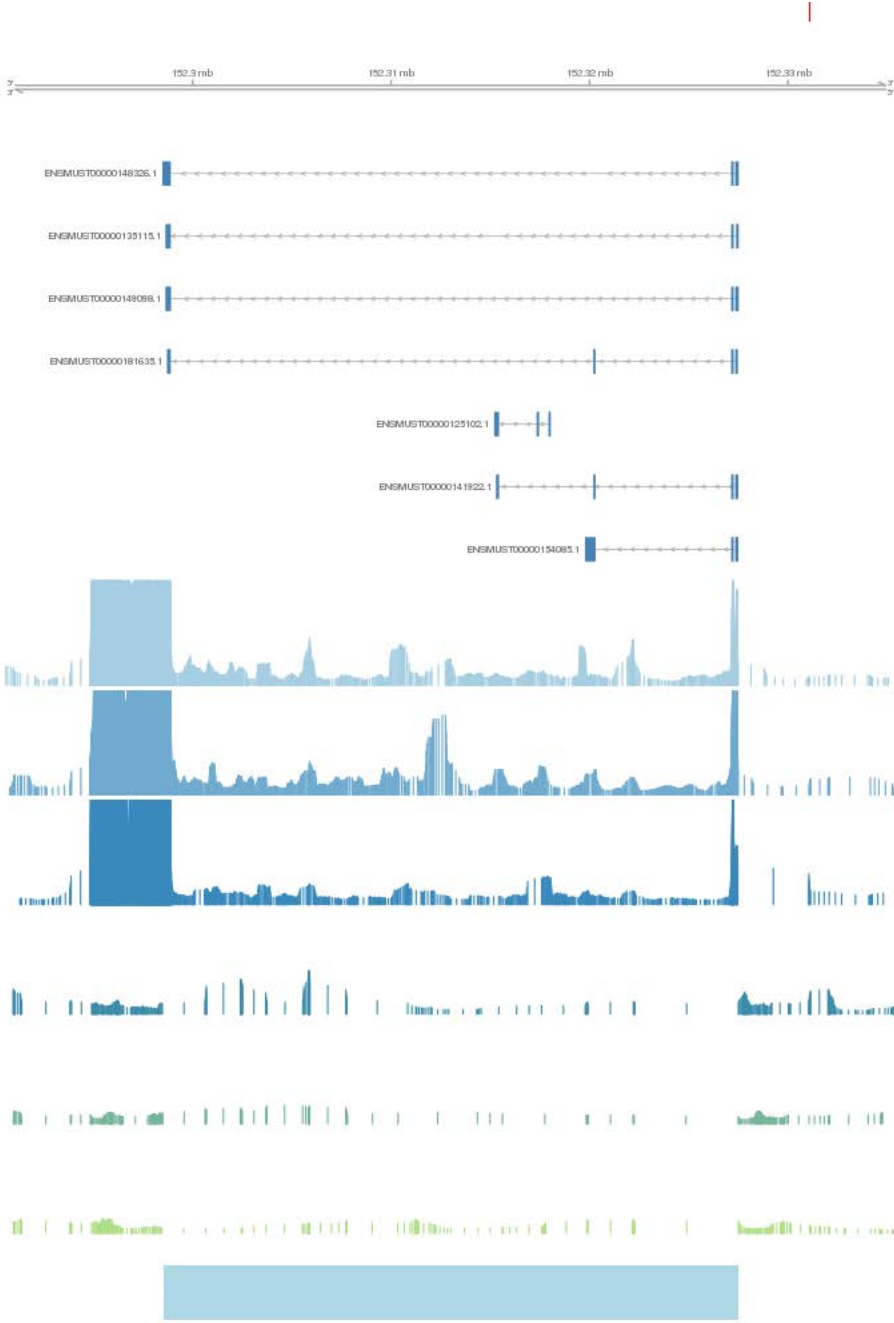

# Differential Analysis

## Differential Genes

There are 766 significantly differentially expressed genes. They are:

|    | geneAnnot\$gene_short_name |
|----|----------------------------|
| 1  | H19                        |
| 2  | Tbx2                       |
| 3  | Ngfr                       |
| 4  | Gira1                      |
| 5  | Hddc2                      |
| 6  | Cdh1                       |
| 7  | Mcts1                      |
| 8  | Itga5                      |
| 9  | Gabra2                     |
| 10 | Col6a1                     |
| 11 | Snmp27                     |
| 12 | Gabrg1                     |
| 13 | Col18a1                    |
| 14 | Col1a1                     |
| 15 | Eef1e1                     |
| 16 | Sept7                      |
| 17 | Use1                       |
| 18 | Hltf                       |
| 19 | Zfp40                      |
| 20 | Shh                        |
| 21 | Lamb1                      |
| 22 | Fcgrt                      |
| 23 | Bicd1                      |
| 24 | Calb2                      |
| 25 | Zfp81                      |
| 26 | Ptrf                       |
| 27 | Pax2                       |
| 28 | Sst                        |
| 29 | Col26a1                    |
| 30 | Aqp1                       |
| 31 | Tmem242                    |
| 32 | Wisp1                      |
| 33 | Polr2a                     |
| 34 | Corin                      |
| 35 | Nid1                       |
| 36 | Evx1                       |
| 37 | Tep1                       |

38 Fbln1  
39 Nphs1  
40 Acot13  
41 Gabrb2  
42 Khsrp  
43 Dio2  
  
44 0610009B22Rik  
45 Zmiz1  
46 Arid1a  
47 Rplp1  
48 Snrpb2  
49 Bmp7  
50 Sdhd  
51 Slc38a3  
52 Mrpl52  
53 Ebf3  
54 Gabra1  
55 Scarf2  
56 Rpa3  
57 Phox2b  
58 Rps5  
59 Slc41a1  
60 Aldh1a2  
61 Tctex1d2  
62 Cacybp  
63 Ndufa2  
64 Cox6c  
65 Srp19  
66 Hoxa2  
67 Gata2  
68 Ptgds  
69 Psma2  
70 Mrpl32  
  
71 Capza2  
72 Lcorl  
73 Lbp  
74 Atp5e  
75 Ndufa1  
76 Plgrkt  
77 Mrps18c  
78 Sulf1  
79 Etaa1  
80 Vtn

81 Erbb3  
82 Trove2  
83 Anxa6  
84 Gira2  
85 Slc35g3  
86 Slc16a10  
87 Lama4  
88 Fabp7  
89 Nts  
90 Lama2  
91 Actr6  
92 Kittl  
93 Enpp3  
94 Meis1  
95 Grb10  
96 Snrpd3  
97 Phlda1  
  
98 Col6a2  
  
99 Hint1  
100 Hmnr  
101 Fit4  
102 Sar1b  
103 Nefh  
104 Gabrg2  
105 Rps27a  
106 Ccdc104  
107 Aebp1  
108 Smc6  
109 Bcap29  
110 Txndc17  
111 Ntn1  
112 Kihl28  
113 Fkbp3  
114 Scfd1  
115 Nemf  
116 Psmc6  
117 Mpp5  
118 Eif2s1  
119 Smoc1  
120 2010107E04Rik  
121 Tfap2a  
122 Dek  
123 Nol8

124 Ror2  
125 A530054K11Rik  
126 Cetn3  
127 Irx4  
128 Slc6a3  
129 Serf1  
130 Otp  
131 Trim23  
132 Cenpk  
133 Ndufs4  
134 Fam213a  
135 Cdhr1  
136 Psmc6  
137 Chat  
138 Zdihc20  
139 Dnajc15  
140 Sugt1  
141 Bnip3l  
142 Nefm  
143 Uchl3  
144 Dab2  
145 Sub1  
146 Npr3  
147 Skor1  
148 Oxr1  
149 Angpt1  
150 Eif3h  
151 Matn2  
152 Eif3e  
153 Emc2  
  
154 Kcnv1  
155 Ndufb9  
156 Sla  
157 Lrrc6  
158 Enpp2  
159 Myh9  
160 Ndufa6  
161 Plec  
162 Ube2v2  
163 B3gnt5  
164 Sidt1  
165 Ncam2  
166 Arhgap31



167 Sncg  
168 Ndufa5  
169 Scg5  
170 Prph  
171 Igf2r  
172 Thbs2  
173 Zfp51  
174 Pla2g7  
175 Slc5a7  
176 Arhgap28  
177 Cyp1b1  
178 Ndufv2  
179 Epas1  
180 Cript  
181 Uqcc2  
182 Cox7a2l  
183 Slc25a46  
184 Rock1  
185 Esco1  
186 Rnf138  
187 Pgg1b  
188 Yip5  
189 Sec11c  
190 C330018D20Rik  
191 Fbn2  
192 Rps14  
193 Tmx3  
194 Pdgfrb  
195 Slc22a6  
196 Aldh1a7  
197 Kif20b  
198 Capn1  
199 Slit1  
200 Kazald1  
201 Tlx1  
202 Lbx1  
203 Alas2  
204 Rps24  
205 Itgb8  
206 Rps26  
207 Esyt1  
208 Zfp711  
209 Gaa

210 Tmem47  
211 Gdap1  
212 Itih5  
213 Rpl14  
214 Xiap  
215 Kbtbd3  
216 Cwf19l2  
217 Mybl1  
218 Mob4  
219 Nop58  
220 Sumo1  
221 Ndufb3  
222 Sgol2  
223 Col5a2  
224 Col3a1  
225 Tex30  
226 Pdcl3  
227 Mrpl30  
228 Ormdl1  
229 1110058L19Rik  
230 Fn1  
231 Nppc  
232 Cfh  
233 Tfcp2l1  
234 Dbi  
235 Syt2  
236 Lamc1  
237 Kif26b  
238 Dusp27  
239 Ptpn14  
240 Vamp4  
241 Mrc1  
242 Rabgap1l  
243 Yme1l1  
244 Acbd5  
245 Ermn  
246 Lamc3  
247 Gsn  
248 Pax8  
249 Kif18a  
250 Lin7c  
251 B230118H07Rik  
252 Eif3m

253 Fbn1  
254 Cops2  
255 Creb3l1  
256 Map1a  
257 Lamp5  
258 Nusap1  
259 Casc5  
  
260 Otor  
261 Pkia  
262 Snx16  
263 Lrrcc1  
  
264 Psma7  
265 Sec62  
266 Dcun1d1  
267 Hmgcs2  
268 Olfm3  
269 Sfrp2  
270 Enpep  
271 Aimp1  
272 Rps3a1  
273 Depdc1a  
274 Rps20  
275 Casp8ap2  
276 Smc2  
277 Svep1  
278 Zfp37  
279 Bspry  
280 Nudt2  
281 Rps6  
282 Ift74  
283 Magoh  
284 Ccdc23  
285 Cmpk1  
286 Rpl22  
287 Tomm7  
288 Orc5  
289 Slc30a3  
290 Emilin1  
291 Gabra4  
292 Pdgfra  
293 Epha5  
294 Tgfb3  
295 Sparcl1

296 Alb  
297 Ndufa4  
298 Col1a2  
299 Nt5c3  
300 Slc13a4  
301 Zyx  
302 Mrps33  
303 Zfml  
304 Kbtbd8  
305 Plxna1  
306 Slc6a13  
307 Ret  
308 A2m  
309 Dera  
310 Slc6a11  
311 Zfp606  
312 Gipr  
313 Zfp273  
  
314 Dbx1  
315 Mphosph10  
316 Ccdc90b  
317 Tmem126a  
318 Zfand6  
  
319 Ndufc2  
320 Pik3c2a  
321 Rps3  
322 Bag3  
323 Ndufb11  
324 Mrgprf  
325 Vbp1  
326 Rab39b  
327 Cox7b  
328 Hmgn5  
329 Sh3bgrl  
330 Col4a6  
331 Col4a5  
332 Cetn2  
333 Ap1s2  
334 Bgn  
335 Gpr124  
336 Col4a1  
337 Col4a2  
338 Polb

339 Slit2  
340 Pcm1  
341 Scrg1  
342 Irx3  
343 Irx5  
344 Mmp2  
345 Mt3  
346 Cdh5  
347 Hsd11b2  
348 Ankrd49  
349 Cfdp1  
350 Tbx20  
351 Pts  
352 Mpzl2  
353 Robo4  
354 Robo3  
355 Kank2  
356 Dock6  
357 Itga11  
358 Phip  
359 Crabp1  
360 Isl2  
361 Stra6  
362 Tmem30a  
363 Cox7a2  
364 Snapc5  
365 Tgfbr2  
366 Rpsa  
367 Mst1r  
368 Gbbp1  
369 Lama1  
370 Sox10  
371 Mzt1  
372 Wnt6  
373 Antxr1  
  
374 Lgj3  
375 Adra2a  
376 Tlr13  
377 9430020K01Rik  
378 Zbtb41  
379 Zfp944  
380 Gria2  
381 Lsm3

382 Smc4  
383 Gbx2  
384 Hdx  
385 Ankrd12  
386 Lrn1  
387 Ppp1r1c  
388 Pcdh11x  
389 Plvap  
390 Pam1  
391 Arhgap5  
392 Nkx6-1  
393 Lars2  
394 Trim13  
395 Ssc5d  
396 Lysmd3  
397 Fnip1  
398 Colec12  
399 Pnpla8  
400 Rpl39-ps  
401 Lum  
402 March1  
403 Rps27l  
404 Neto2  
405 Bcor1  
406 Anapc10  
407 Tenc1  
408 Sep15  
409 Islr  
410 Matr3  
411 0610009D07Rik  
412 Thoc2  
413 Cldn11  
414 Cdkn3  
415 Avp  
416 Neurod6  
417 2700029M09Rik  
418 Cntln  
419 Notch3  
420 Spon1  
421 Fam126b  
422 Fau  
423 Foxf2  
424 Akap12

425 Gng10  
426 Med30  
427 Creb3l2  
428 Atp5j2  
  
429 Lmx1b  
430 Rps21  
431 Timm8b  
432 Anpep  
433 Zfp503  
434 Rpl22l1  
435 Pcsk1n  
436 Raly1  
437 Slc6a5  
438 Gjb6  
439 Nxph4  
440 Zfp770  
441 Cdh12  
442 Tlx3  
443 St8sia4  
444 Snmp25  
445 Slc22a2  
446 Npnt  
447 Trim62  
448 Ostc  
449 Nbl1  
450 Arhgap11a  
451 Car8  
452 Tmem29  
453 Piezo2  
454 Fmod  
455 Gucy1a2  
456 Fcho2  
457 Prxl1  
458 Slc24a4  
459 Abca9  
460 Tbca  
461 Zfp386  
462 Bend6  
463 Nxt2  
464 Rbm7  
465 Dctpp1  
466 Klhl14  
467 Shfm1

468 Sh2b3  
469 Tfap2d  
470 Itpr3  
471 Imp11  
472 Selk  
473 Wbp5  
474 B630005N14Rik  
475 Hebp1  
476 Tuba1c  
477 Hic1  
478 Aqp6  
479 Smco3  
480 Rab9b  
481 Tril  
482 Rpl7  
483 Pura  
  
484 Sptssa  
485 Gm9493  
486 Rin3  
487 Zfp758  
488 Trmt10c  
489 Rpl18a  
490 Dpy19l4  
491 Cenpe  
492 Defb11  
493 Gprin3  
494 Onecut3  
495 Penk  
496 Olig3  
497 Esf1  
498 Zfp36l2  
499 Polr2k  
500 Zfp62  
501 Gjb2  
502 C77370  
503 Olfml2a  
504 Ppp1r3b  
505 Ccdc108  
506 Zfp654  
507 Dynlrb1  
508 Adamts12  
509 Mafa  
510 Rps8



511 Rpsa-ps10  
512 Zcchc5  
513 Tmem196  
514 Pirt  
515 Crebrf  
516 Sacs  
517 Zfp738  
518 Osr1  
519 Ranbp3l  
520 Igf2  
521 Myof  
522 C1galt1c1  
523 Mterfd3  
524 Gm8186  
525 Plcx3  
526 Zfp518a  
527 Tceal1  
528 Adamts16  
529 2410015M20Rik  
  
530 Tmsb4x  
531 Shisa3  
532 Foxc1  
533 Gm9843  
534 Foxl2  
535 Gm9846  
536 Atp5k  
537 Zfp366  
538 Gja1  
  
539 Gprc5c  
540 Rgs13  
541 Sv2c  
542 Commd3  
543 Nhlh1  
544 Gm6563  
545 Tceal8  
546 Coa6  
547 Gypa  
548 Xkr4  
549 Pfdn4  
550 Rps10  
551 Gpr17  
552 Hbb-bs  
553 Lamb2

554 C130021120Rik

555 Aldh1a1

556 Sec61b

557 Zfp943

558 Thoc7

559 Atf7ip

560 Spock3

561 Atpif1

562 Adam12

563 Mmm1

564 Hmgb2

565 Zfp182

566 Fsd1l

567 Zfp935

568 Zfp101

569 Tns1

570 Fut9

571 Maf

572 Zfp458

573 Gpc3

574 Zfp277

575 Triqk

576 Al504432

577 Col8a2

578 Uts2b

579 Cd248

580 Foxk1

581 Mpz

582 Kdm5d

583 Foxb2

584 Gadl1

585 Gm7536

586 Npm1

587 Zfp759

588 Mab2112

589 Zfp119a

590 Rpl32

591 AA987161

592 Gm5148

593 Zfp68

594 Zfp85-rs1

595 Gpc6

596 Zfp958

597 Col13a1  
598 Zfp708  
599 Gm10053  
600 Zfp945  
601 Rpl11  
602 Zfp933  
603 Zfp930  
604 Unc5c  
605 Gm10073  
606 Rp2h  
607 Tpt1  
608 Gm10076  
609 BC002059  
610 Scrt2  
611 2610008E11Rik  
612 linc-Bm1a  
613 Rps10-ps1  
614 Tsga10  
615 Rpl26  
616 Zfp873  
617 Rps7  
618 Zic2  
619 Zfp229  
620 Tac1  
621 Rps12  
622 Rpl34  
623 Rpl9-ps6  
624 Rps3a2  
625 Zfp677  
626 Zfp938  
627 Gm10123  
628 Kdr  
629 Mrpl42  
630 Sox7  
631 3300002I08Rik  
632 Zfp947  
633 Cyp26b1  
634 Rps15  
635 Col23a1  
636 Chchd1  
637 Uqcrh  
638 Fbln2  
639 Gm10146

640 mt-Nd1  
641 mt-Nd2  
642 mt-Co1  
643 mt-Co2  
644 mt-Co3  
645 mt-Nd4  
646 Rpl36-ps3  
647 Cntnap5b  
648 Foxd3  
  
649 Tspan6  
650 Zfp763  
651 Gm10221  
652 Zfp760  
653 Zfp948  
654 Zfp160  
655 Zfp442  
656 Zfp120  
657 Ndufaf2  
658 Col8a1  
659 Gm11808  
660 Slc4a5  
661 Efcab1  
662 Flnc  
663 Gm10250  
664 Rap1a  
665 Ssb  
666 Ddx3y  
667 Gm10260  
668 Nxph2  
669 Zfp72  
670 Gm10275  
671 Gm5595  
672 Zfp820  
673 Hba-a2  
674 Hba-a1  
675 Gm10288  
676 Tmem256  
677 Smim15  
678 Zfp946  
679 Zfp942  
680 Zfp71-rs1  
681 Rpl23  
682 Phf2011

683 Gm13826  
684 4930522L14Rik  
685 Vma21  
686 Trim10  
687 Dok6  
688 Myeov2  
689 Nbeal1  
690 Hbb-bt  
691 9830147E19Rik  
692 Zfp788  
693 Mafb  
694 Gm10742  
695 Thbd  
696 Gm561  
697 Zfp808  
698 Ctxn2  
699 Accs1  
700 Hoxc4  
701 Nynrin  
702 Selt  
703 Rpl23a-ps3  
  
704 Gm2000  
705 Gm3940  
706 Foxd1  
707 Samp  
708 AU041133  
709 Abracl  
710 2210404O09Rik  
711 Zfp931  
712 Gm14326  
713 Gm14322  
714 Gm14418  
715 Gm14305  
716 Gm14391  
717 D130040H23Rik  
718 Jrkl  
719 Ccdc82  
720 Haus3  
721 Hoxa3  
722 Rpl39  
723 Tceb1  
724 Zfp703  
725 Gm12688

726 Xist  
727 Gm15500  
728 Kantr  
729 Gm15501  
730 Tmsb15b2  
731 Dlx6os1  
732 Gm10177  
733 Pcp4  
734 2810055G20Rik  
735 Snrpe  
736 Gm5611  
737 Zfp712  
738 Myl6  
739 Lrrc32  
740 Gm5141  
741 Gm10269  
742 Skor2  
743 Tma7  
744 Lsm5  
745 Cox16  
  
746 Gm4540  
747 Zfp804b  
748 Zfp141  
749 Rpl41  
750 Zfp955a  
751 Gm14403  
752 Rps2-ps6  
753 Figl2  
754 Gm6472  
755 Gm7094  
756 Gm4944  
757 Zfp955b  
758 Foxl2os  
  
759 A330076H08Rik  
760 Gm26917  
761 Gm17750  
762 Gm26924  
763 A430106G13Rik  
764 Gm27031  
765 Snhg6  
766 RP23-442I7.1

## Matrix of gene significant differences between conditions

(skip for Brainmap wt-v-ko comparisons)

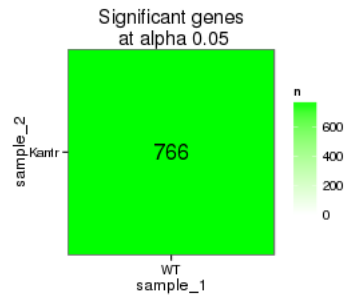

## Significant gene expression differences between conditions

Expression plot (genes):(turned off)

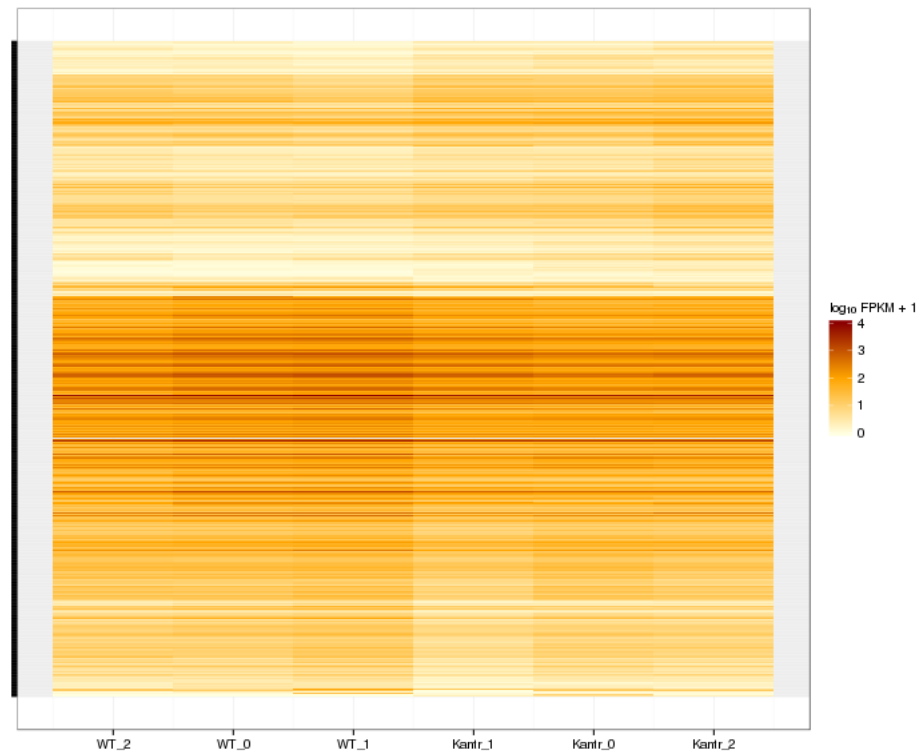

Significant genes with expression >50fpm (any condition):(turned off)

An individual look at each of the highly expressed significantly differentially regulated genes: (eval=false for first pass)

## Expression-level/significance relationship

Scatter plot of significant genes only:

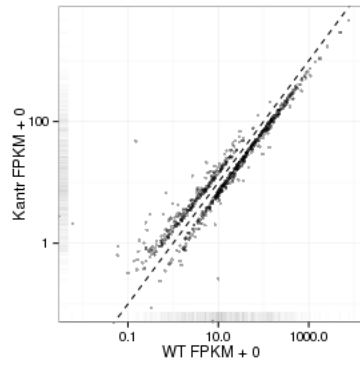

Volcano Plot

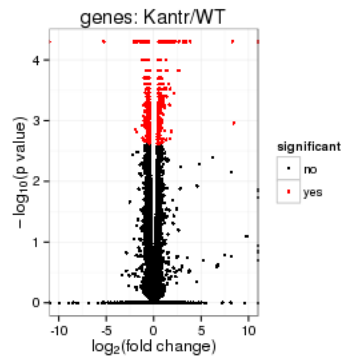

Volcano plot with significant genes only:



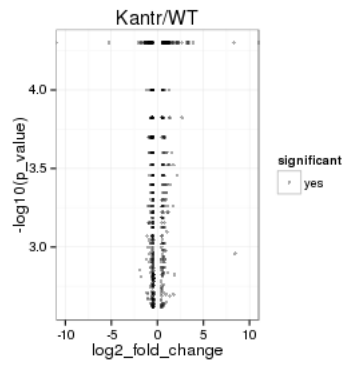

FoldChange Heatmap

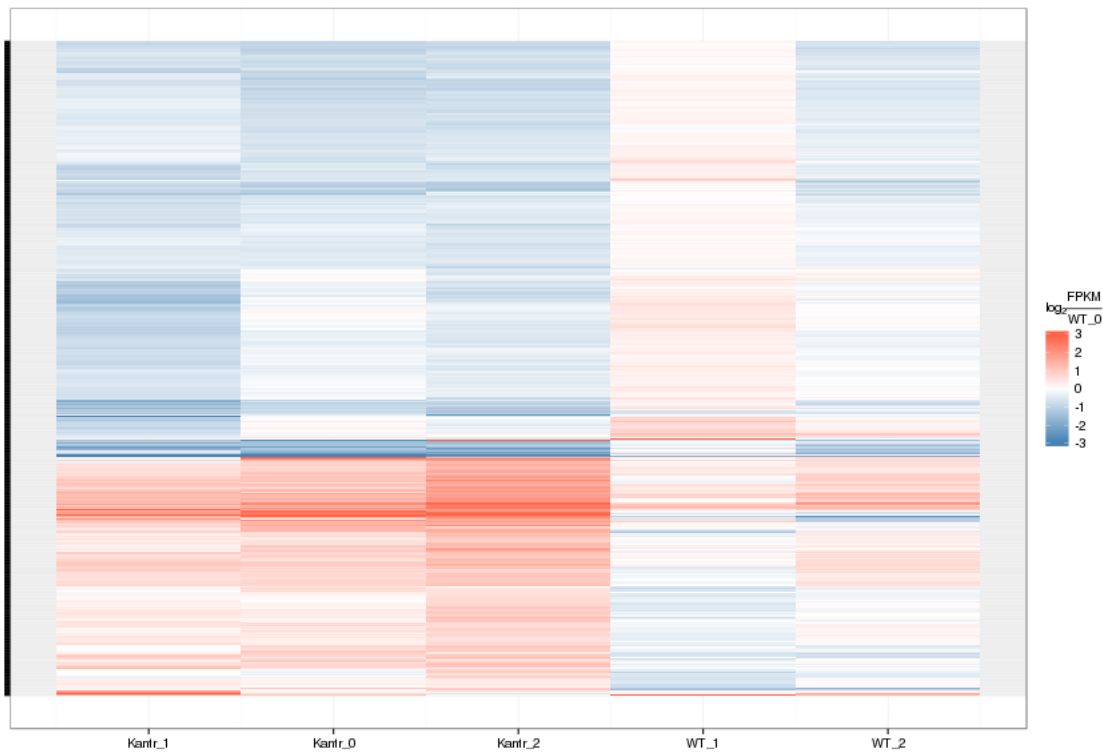

## Differential Splicing

Differential Isoforms between conditions

Per isoform difference between conditions:

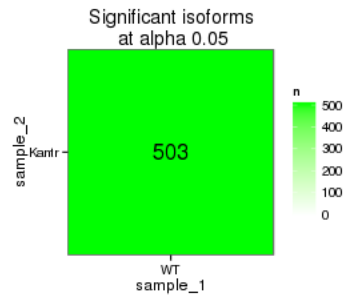

These isoforms are:

|    | isoAnnot | gene_short_name |
|----|----------|-----------------|
| 1  | H19      |                 |
| 2  | Tbx2     |                 |
| 3  | Ngfr     |                 |
| 4  | Hddc2    |                 |
| 5  | Cdh1     |                 |
| 6  | Mcts1    |                 |
| 7  | Gabra2   |                 |
| 8  | C1d      |                 |
| 9  | Serpinf1 |                 |
| 10 | Col6a1   |                 |
| 11 | Gabrg1   |                 |
| 12 | Col18a1  |                 |
| 13 | Col1a1   |                 |
| 14 | Eef1e1   |                 |
| 15 | Use1     |                 |
| 16 | Zfp40    |                 |
| 17 | Lamb1    |                 |
| 18 | Dvl3     |                 |
| 19 | Fcgrt    |                 |
| 20 | Bicd1    |                 |
| 21 | Zfp81    |                 |
| 22 | Ptrf     |                 |
| 23 | Pax2     |                 |
| 24 | Hif3a    |                 |
| 25 | Sst      |                 |
| 26 | Aqp1     |                 |

27 Tmem242  
28 Wisp1  
29 Corin  
30 Nid1  
31 Kif5b  
32 Gabrb2  
33 Dio2  
34 0610009B22Rik  
35 Rplp1  
36 Snrpb2  
  
37 Bmp7  
38 Gabra1  
39 Scarf2  
40 Phox2b  
41 Rps5  
42 Cacybp  
43 Cox6c  
44 Hoxa2  
45 Gata2  
46 Ptgds  
47 Psm2  
48 Mrpl32  
49 Capza2  
50 Atp5e  
51 Ndufa1  
52 Mrps18c  
53 Vtn  
54 Erbb3  
55 Trove2  
56 Glra2  
57 Slc35g3  
58 Slc16a10  
59 Lama4  
60 Fabp7  
61 Nts  
62 Lama2  
63 Actr6  
  
64 Kitl  
  
65 Moxd1  
66 Meis1  
67 Col6a2  
68 Hmnr

69 Flt4  
70 Sar1b  
71 Nefh  
72 Rps27a  
73 Ccdc104  
74 Aebp1  
75 Smc6  
76 Fam20a  
77 Bcap29  
78 Mrc2  
79 Ntn1  
80 Fkbp3  
81 Scfd1  
82 Mpp5  
83 Eif2s1  
84 Hsp90aa1  
85 2010107E04Rik  
86 Dek  
87 Nol8  
88 A530054K11Rik  
89 Cetn3  
90 Ankrd32  
91 Irx4  
92 Otp  
93 Trim23  
94 Ndufs4  
95 Cdhr1  
96 Psmc6  
97 Chat  
98 Zdhhc20  
99 Dnajc15  
100 Sugt1  
101 Nefm  
102 Uchl3  
103 Dab2  
104 Npr3  
105 Oxr1  
106 Angpt1  
107 Eif3h  
108 Eif3e  
109 Emc2  
110 Kcnv1  
111 Col14a1  
112 Enpp2

113 Myh9  
114 Ndufa6  
115 Ube2v2  
116 B3gnt5  
117 Zbtb20  
  
118 Fgd4  
119 Arhgap31  
  
120 Sncg  
121 Prph  
122 Thbs2  
123 Zfp51  
124 Pla2g7  
125 Slc5a7  
126 Arhgap28  
127 Cyp1b1  
128 Ndufv2  
129 Epas1  
130 Uqcc2  
131 Esco1  
132 Fbn2  
133 Rps14  
134 Tmx3  
135 Pdgfrb  
136 Slc22a6  
137 Kif20b  
138 Lbx1  
139 Rps24  
140 Rps26  
141 Esyt1  
142 Zfp711  
143 Tmem47  
144 Itih5  
145 Stag2  
146 Cwf19l2  
147 Lypla1  
148 Rb1cc1  
149 Mob4  
150 Nop58  
151 Sumo1  
152 Ndufb3  
153 Col5a2  
154 Col3a1  
155 Mrpl30

156 1110058L19Rik  
157 Fn1  
158 Nppc  
159 Dbi  
160 Syt2  
161 Lamc1  
162 Cenpf  
163 Mrc1  
164 Itga8  
165 Col5a1  
166 Lamc3  
167 Pax8  
168 Kif18a  
169 Eif3m  
170 Fbn1  
171 Cops2  
172 Lamp5  
173 Otor  
174 Pkia  
  
175 Dcun1d1  
176 Pdcc10  
177 Sfrp2  
178 Enpep  
179 Aimp1  
180 Rps3a1  
181 Abca4  
182 Tmem68  
183 Casp8ap2  
184 Svep1  
185 Zfp37  
186 Bspry  
187 Rps6  
188 Ifit4  
189 Magoh  
190 Col9a2  
191 Tomm7  
192 Orc5  
193 Mxra8  
194 Slc30a3  
195 Tgfb3  
196 Ndufa4  
197 Col1a2  
198 Slc13a4

199 Zyx  
200 Slc6a13  
201 Ret  
202 A2m  
203 Dera  
204 Dbx1  
205 Mphosph10  
206 Ccdc90b  
207 Zfand6  
208 Ndufc2  
209 Ndufb11  
210 Zfp300  
211 Vbp1  
212 Atrx  
213 Cox7b  
214 Hmgn5  
215 Sh3bgr1  
216 Col4a6  
217 Bgn  
218 Col4a1  
219 Pcm1  
220 Mmp2  
221 Cdh5  
222 Tbx20  
223 Mpzl2  
224 Robo3  
225 Kank2  
  
226 Dock6  
227 Rora  
228 Itga11  
229 Phip  
  
230 Crabp1  
231 Tmem30a  
232 Cox7a2  
233 Tgfb2  
234 Rpsa  
235 Ccdc88a  
236 Lama1  
237 Sox10  
238 Wnt6  
239 Lgi3  
240 Zfp944  
241 Gria2

242 Lsm3  
243 Smc4  
244 Gbx2  
245 Pcdh11x  
246 Pam1  
247 Wnk4  
248 Arhgap5  
249 1110059E24Rik  
250 Nkx6-1  
251 Lars2  
252 Trim13  
253 Scai  
254 G2e3  
255 Lysmd3  
256 Rpl39-ps  
257 Rps27l  
258 Neto2  
259 Anapc10  
260 Islr  
261 Matr3  
262 Itih2  
263 0610009D07Rik  
264 Thoc2  
265 Cldn11  
266 Neurod6  
267 Spon1  
268 Fam126b  
269 Foxf2  
270 Akap12  
271 Atp5j2  
272 Lmx1b  
273 Rps21  
274 Timm8b  
275 Zfp503  
276 Rpl22l1  
277 Slc6a5  
278 Gjb6  
279 Nxp4  
280 Cdh12  
281 Tlx3  
282 St8sia4  
283 Slc22a2  
284 Phf8



285 Car8  
286 Fmod  
287 Gucy1a2  
288 Prrx1  
289 Abca9  
290 Tbca  
291 Zfp386  
292 Bend6  
293 Ehbp1  
294 Dctpp1  
295 Shfm1  
296 Itpr3  
297 Imp1  
298 Selk  
299 Wbp5  
300 B630005N14Rik  
301 Hebp1  
302 Egflam  
303 Tuba1c  
304 Hic1  
305 Aqp6  
306 Tril  
307 Rpl7  
308 Sptssa  
309 Gm9493  
310 Trmt10c  
311 Cenpe  
312 Onecut3  
313 Penk  
314 Olig3  
315 Esf1  
316 Zfp322a  
317 Gjb2  
318 Olfml2a  
319 Tefm  
320 Zfp654  
321 Dynlrb1  
322 Adamts12  
323 Mafa  
324 Rps8  
325 Rpsa-ps10  
326 Zcchc5  
327 Sned1  
328 Tmem196

329 Pirt  
330 Col6a3  
331 Zfp738  
332 Osr1  
333 Ranbp3l  
  
334 Igf2  
335 Plcx3  
336 Zfp518a  
337 Tmsb4x  
338 Shisa3  
339 Foxc1  
  
340 Gm9843  
341 Gm9846  
342 Vstm4  
343 Atp5k  
344 Gja1  
345 Sv2c  
346 Commd3  
347 Nhlh1  
348 Gm6563  
349 Six1  
350 Tceal8  
351 Coa6  
352 Gypa  
353 Pfdn4  
354 Il1rap1  
355 C130021120Rik  
356 Aldh1a1  
357 Sec61b  
358 Zfp943  
359 Thoc7  
360 Atf7ip  
361 Atpif1  
362 Adam12  
363 Mmm1  
364 Kihl18  
365 Tns1  
366 Fut9  
367 Gpc3  
368 Triqk  
369 Al504432  
370 Col8a2  
371 Uts2b

372 Slit3  
373 Cd248  
374 Mpz  
375 Kdm5d  
376 Foxb2  
377 Gad1  
378 Gm7536  
379 Zfp759  
380 Mab21l2  
381 Rpl32  
382 AA987161  
383 Gda  
384 Zfp958  
385 Zfp708  
386 Gm10053  
387 Zfp933  
388 Zfp930  
389 Gm10073  
390 Rp2h  
391 Sct2  
392 2610008E11Rik  
393 Zfp868  
394 Rps10-ps1  
  
395 Rpl26  
396 Zfp873  
397 Rps7  
398 Zic2  
399 Rps12  
400 Rpl34  
401 Rpl9-ps6  
402 Rps3a2  
403 Zfp938  
404 Kdr  
405 Mrpl42  
406 Cyp26b1  
407 Rps15  
408 Col23a1  
409 Chchd1  
410 Uqcrh  
411 Fbln2  
412 Gm10146  
413 mt-Nd1  
414 mt-Nd2

415 mt-Nd4  
416 Foxd3  
417 Zfp763  
418 Gm10221  
419 Zfp760  
420 Zfp948  
421 Zfp160  
422 Ndufaf2  
423 Col8a1  
424 Gm11808  
425 Slc4a5  
426 Efcab1  
427 Rap1a  
428 Ssb  
429 Ddx3y  
430 Gm10260  
431 Nxph2  
432 Zfp72  
433 Gm10275  
434 Gm10288  
435 Smim15  
436 Zfp946  
437 Zfp942  
438 Zfp71-rs1  
439 Rpl23  
440 Gm13826  
441 Dok6  
442 Myeov2  
443 Nbeal1  
444 Hbb-bt  
445 Rpl13a  
446 9830147E19Rik  
447 Ehd2  
448 Mafb  
449 Gm10742  
  
450 Thbd  
451 Gm561  
452 Zfp808  
453 Scn2a1  
454 Hoxc4  
455 Rpl23a-ps3  
456 Gm2000  
457 Gm3940

458 Foxd1  
459 AU041133  
460 Abracl  
461 2210404O09Rik  
462 Zfp931  
463 Gm14326  
464 Gm14418  
465 Jrkl  
466 Haus3  
467 Rpl39  
468 Tceb1  
469 Zfp703  
470 Gm12688  
471 Xist  
472 Gm15500  
473 Kantr  
474 Tmsb15b2  
475 3110047P20Rik  
476 Gm10177  
477 Pcp4  
478 2810055G20Rik  
479 Snrpe  
480 Zfp712  
481 Myl6  
482 Lrrc32  
483 Gm5141  
484 Gm10269  
485 Tma7  
486 Gm4540  
487 Zfp804b  
488 Zfp141  
489 Rpl41  
490 Zfp955a  
491 Gm14325  
492 Zfp748  
493 Gm6472  
494 Gm4944  
495 Foxl2os  
496 Gm17750  
497 Gm26924  
498 A430106G13Rik  
499 Gm27031  
500 Snhg6

Gene-level DE isoform heatmap

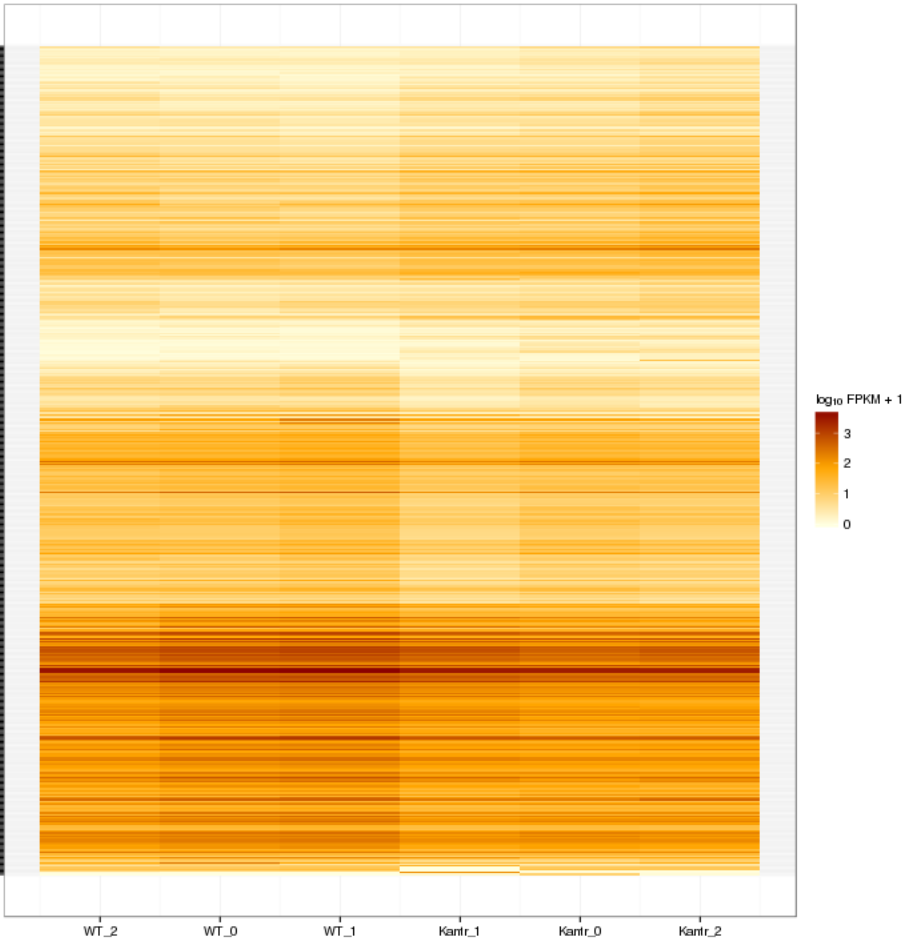

Isoform foldchange heatmap by isoform:

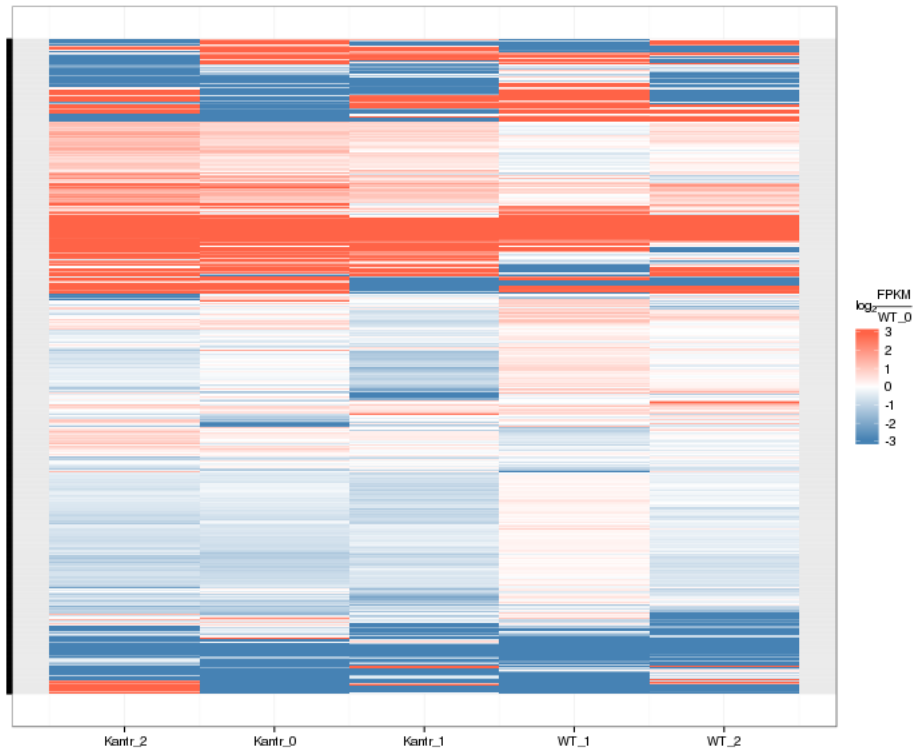

## Differential Splicing between conditions

(eval false for first pass)

Per condition differences in isoforms (Does gene have diff piechart between conditions?)

These genes are:

Splicing heatmap by isoform:

Splicing heatmap by gene

The following are significantly differentially spliced genes (relative portion of isoform per condition):

## Gene/Pathway Analysis

### GSEA

Enrichment and zscores are calculated based on expression in KO vs WT ( $\text{fpkmKO}/\text{fpkmWT}$ ), so genes that are down regulated in KO are shown in blue, while upregulation is shown in red.

KO/WT Blue = down in KO Red = Up in KO

Biocarta enrichment:

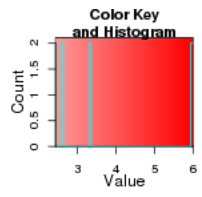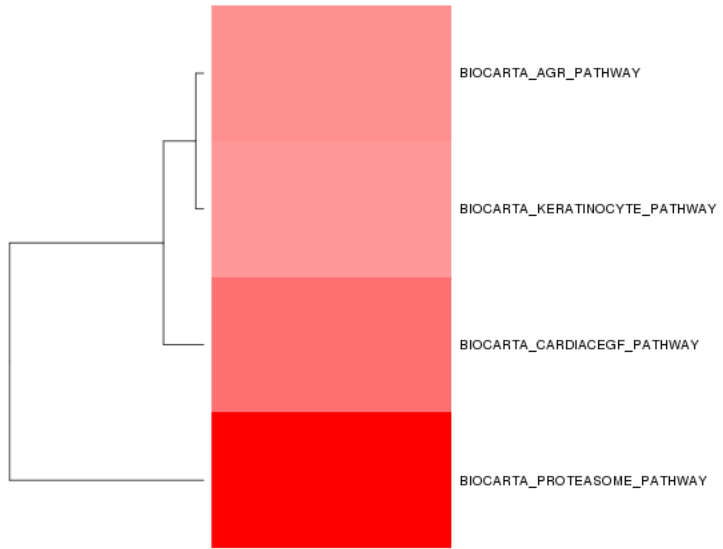

Biocarta zscore:



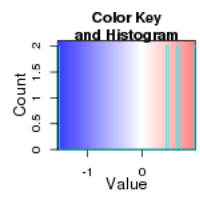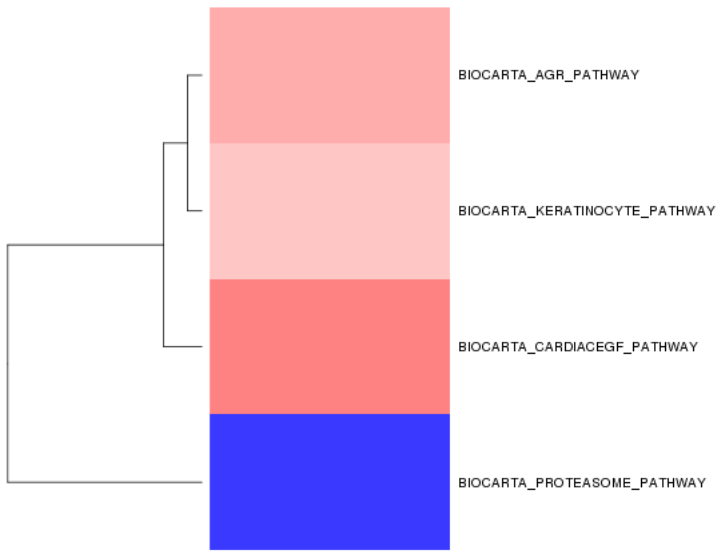

Reactome enrichment:

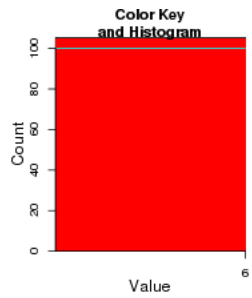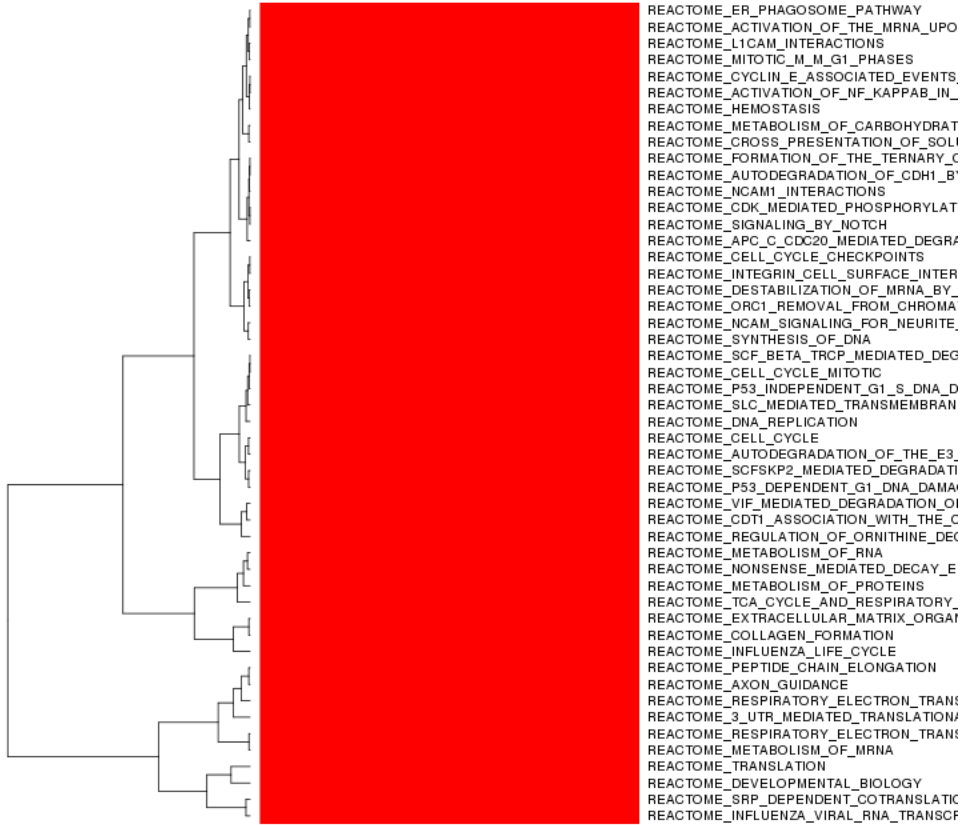

Reactome zscore:

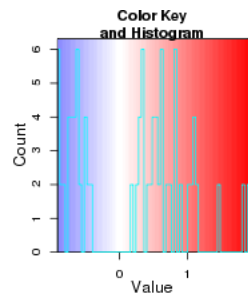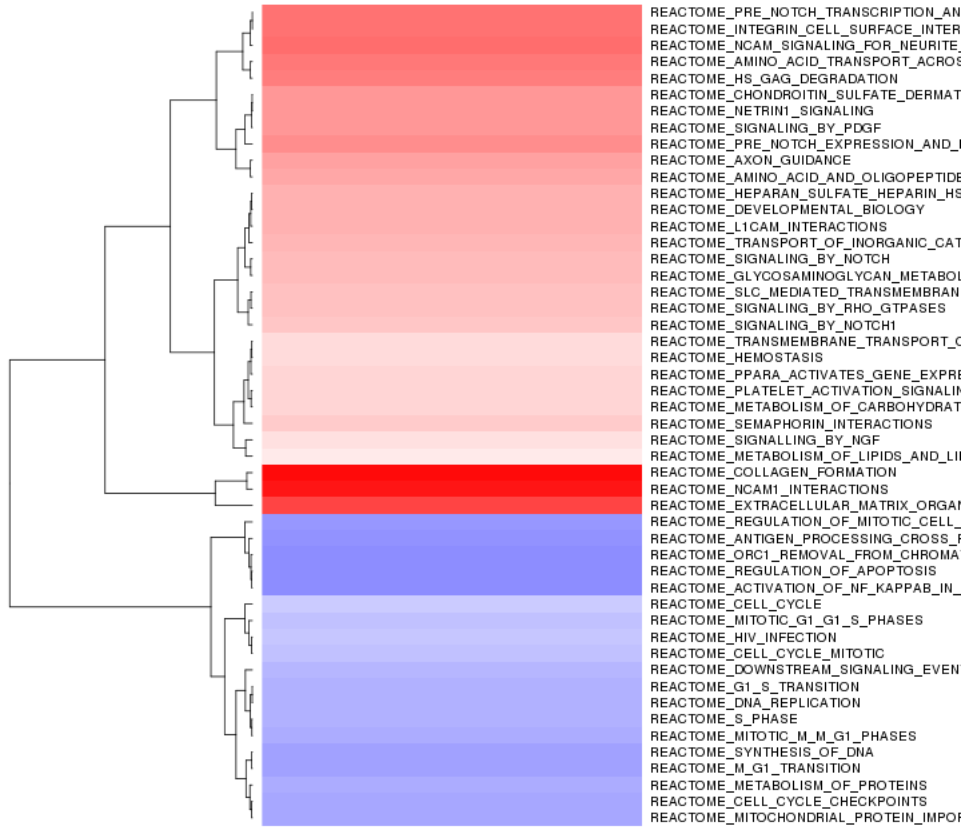

Kegg enrichment:

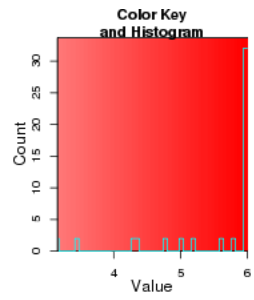

\_\_\_\_\_

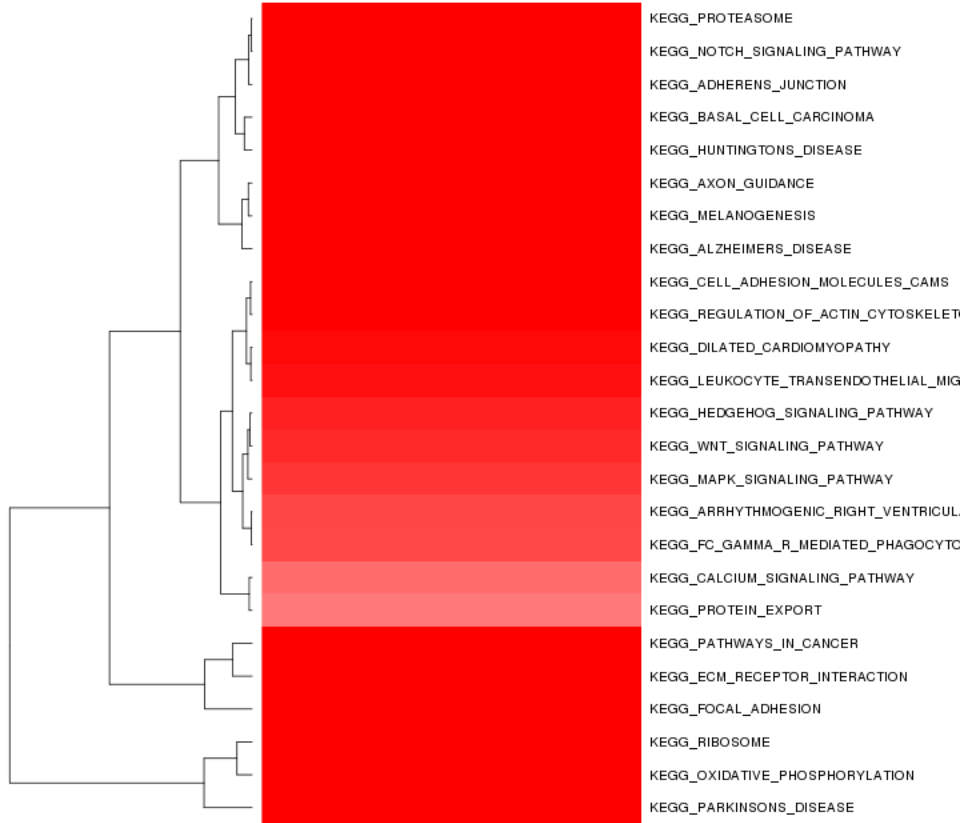

Kegg zscore:

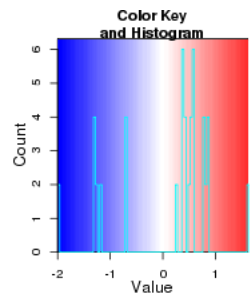

\_\_\_\_\_

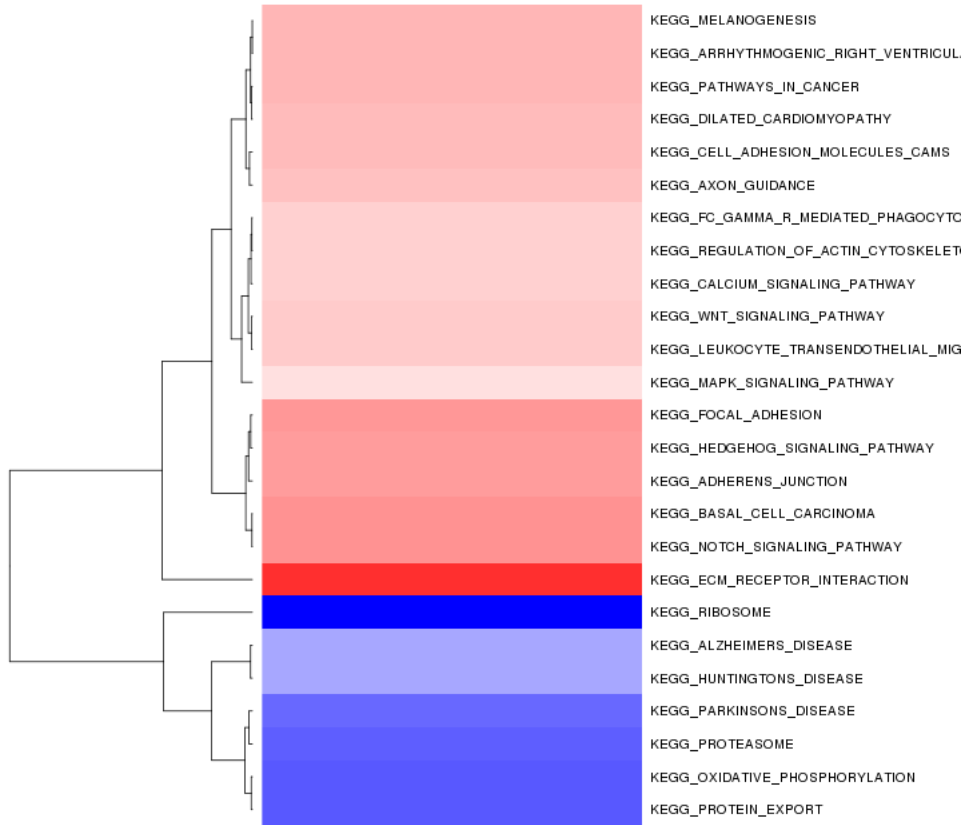

Interneuron enrichment:

```
## Error: argument is of length zero
```

Interneuron zscore:

```
## Error: incorrect number of dimensions
```

```
## Error: object 'x_ordered' not found
```

```
## Error: error in evaluating the argument 'x' in selecting a method for function 'as.matrix': Error: object 'x_ordered' not found
```

```
## Error: object 'x_ordered' not found
```

Oncogene enrichment:

```
## Error: subscript out of bounds
```

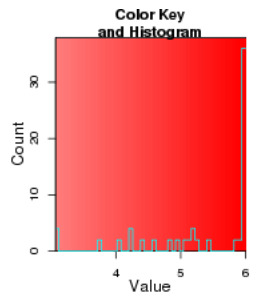

\_\_\_\_\_

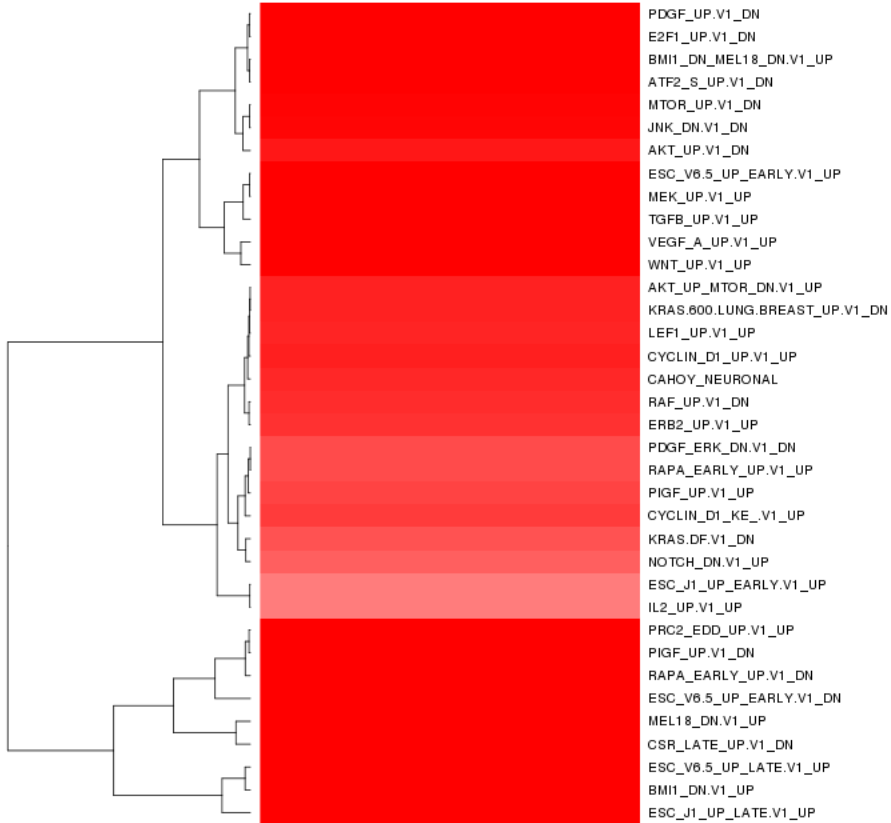

Oncogene zscore:

## Error: subscript out of bounds

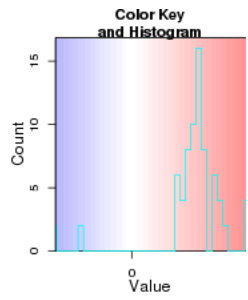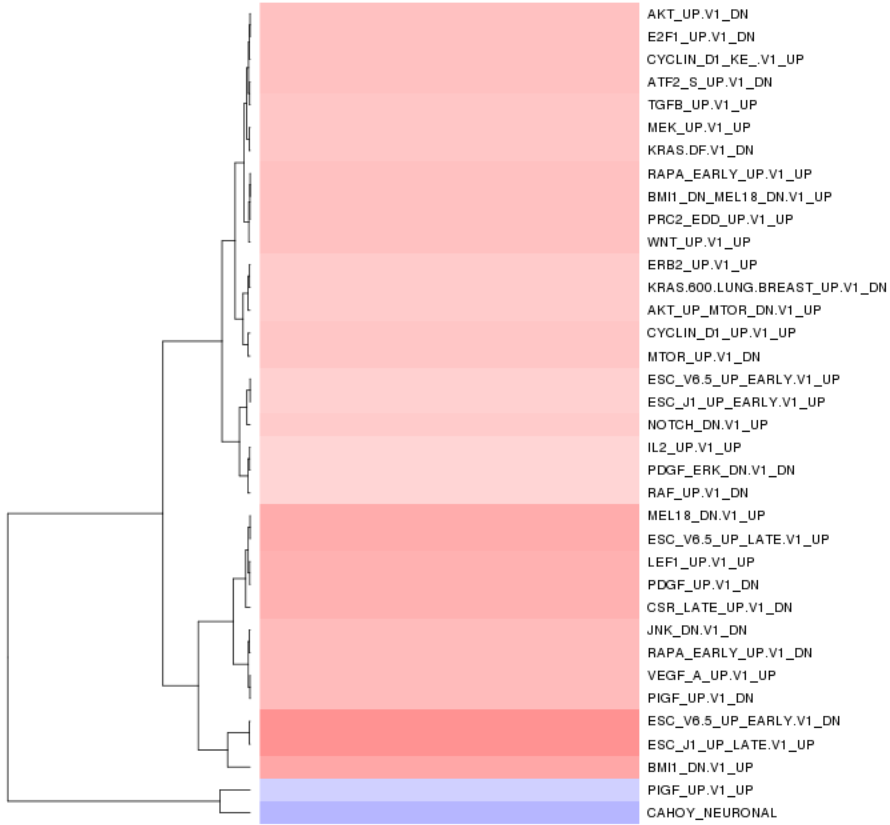

Immuno enrichment:

## Error: no locations are finite





\_\_\_\_\_

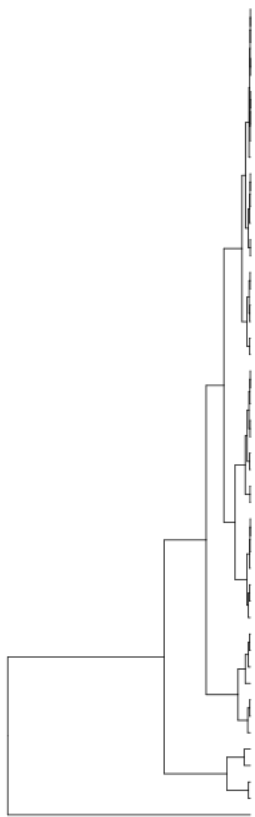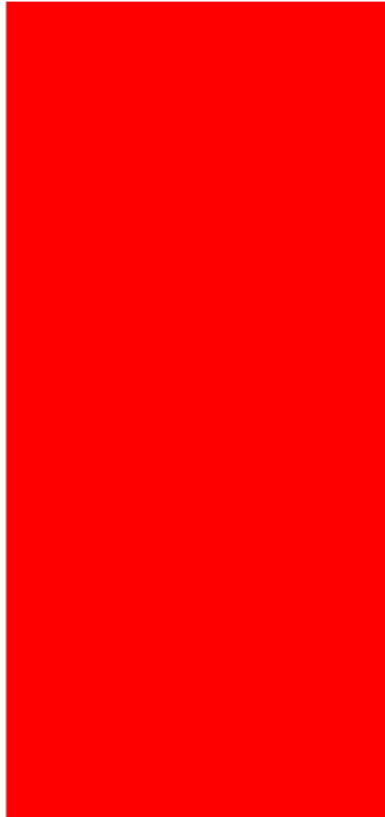

GSE11057\_CD4\_CENT\_MEM\_VS\_PBMC\_UP  
GSE22886\_CD8\_VS\_CD4\_NAIVE\_TCELL\_UP  
GSE22886\_IL2\_VS\_IL15\_STIM\_NKCELL\_DN  
GSE15750\_WT\_TRAF6KO\_DAY10\_EFF\_CD8  
GSE17721\_LPS\_VS\_PAM3CSK4\_1H\_BMDM\_UP  
GSE17974\_CTRL\_VS\_ACT\_IL4\_AND\_ANTI\_IL12  
GSE17721\_CPG\_VS\_GARDIQUIMOD\_0.5H\_BMC  
GSE24142\_DN2\_VS\_DN3\_THYMOCYTE\_DN  
GSE8515\_IL1\_VS\_IL6\_4H\_STIM\_MAC\_DN  
GSE15930\_NAIVE\_VS\_48H\_IN\_VITRO\_STIM\_IF  
GSE15930\_NAIVE\_VS\_48H\_IN\_VITRO\_STIM\_CI  
GSE26669\_CTRL\_VS\_COSTIM\_BLOCK\_MLR\_CI  
GSE15215\_CD2\_POS\_VS\_NEG\_PDC\_UP  
GSE29618\_BCELL\_VS\_MONOCYTE\_DAY7\_FLU  
GSE15930\_NAIVE\_VS\_48H\_IN\_VITRO\_STIM\_IL  
GSE15930\_NAIVE\_VS\_48H\_IN\_VITRO\_STIM\_IF  
GSE24634\_TREG\_VS\_TCONV\_POST\_DAYS\_IL4  
GSE13485\_DAY3\_VS\_DAY21\_YF17D\_VACCINE  
GSE22886\_NAIVE\_CD4\_TCELL\_VS\_MEMORY\_T  
GSE9988\_LOW\_LPS\_VS\_CTRL\_TREATED\_MONO  
GSE17721\_CPG\_VS\_GARDIQUIMOD\_4H\_BMDM  
GSE360\_HIGH\_DOSE\_B\_MALAYI\_VS\_M\_TUBE1  
GSE9988\_ANTI\_TREM1\_VS\_CTRL\_TREATED\_M  
GSE36392\_TYPE\_2\_MYELOID\_VS\_NEUTROPHI  
GSE6269\_E\_COLL\_VS\_STREP\_AUREUS\_INF\_P  
GSE9988\_LPS\_VS\_VEHICLE\_TREATED\_MONO  
GSE9988\_LPS\_VS\_CTRL\_TREATED\_MONOCYT  
GSE6269\_HEALTHY\_VS\_E\_COLL\_INF\_PBMC\_U  
GSE3982\_MAC\_VS\_NEUTROPHIL\_LPS\_STIM\_U  
GSE7400\_CTRL\_VS\_CSF3\_IN\_VIVO\_TREATED  
GSE6269\_FLU\_VS\_E\_COLL\_INF\_PBMC\_UP  
GSE17721\_PAM3CSK4\_VS\_CPG\_0.5H\_BMDM\_I  
GSE13485\_DAY7\_VS\_DAY21\_YF17D\_VACCINE  
GSE9988\_LOW\_LPS\_VS\_VEHICLE\_TREATED\_I  
GSE7400\_WT\_VS\_FOXP3\_HET\_ACT\_WITH\_TG1  
GSE8515\_CTRL\_VS\_IL6\_4H\_STIM\_MAC\_DN  
GSE17721\_LPS\_VS\_PAM3CSK4\_1H\_BMDM\_DN  
GSE22886\_NAIVE\_CD4\_TCELL\_VS\_48H\_ACT\_T  
GSE9988\_ANTI\_TREM1\_VS\_VEHICLE\_TREAT  
GSE6269\_HEALTHY\_VS\_FLU\_INF\_PBMC\_DN  
GSE9988\_ANTI\_TREM1\_AND\_LPS\_VS\_VEHICLI  
GSE14000\_TRANSLATED\_RNA\_VS\_MRNA\_4H  
GSE13485\_DAY1\_VS\_DAY21\_YF17D\_VACCINE  
GSE14000\_TRANSLATED\_RNA\_VS\_MRNA\_16H  
GSE9988\_ANTI\_TREM1\_AND\_LPS\_VS\_CTRL\_T  
GSE29617\_CTRL\_VS\_DAY3\_TIV\_FLU\_VACCINE  
GSE15930\_NAIVE\_VS\_48H\_IN\_VITRO\_STIM\_CI  
GSE15750\_DAY6\_VS\_DAY10\_EFF\_CD8\_TCELL  
GSE29617\_CTRL\_VS\_TIV\_FLU\_VACCINE\_PBMC  
GSE13485\_DAY1\_VS\_DAY21\_YF17D\_VACCINE

Immuno zscore:

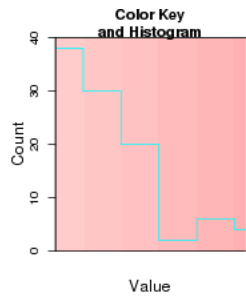

\_\_\_\_\_

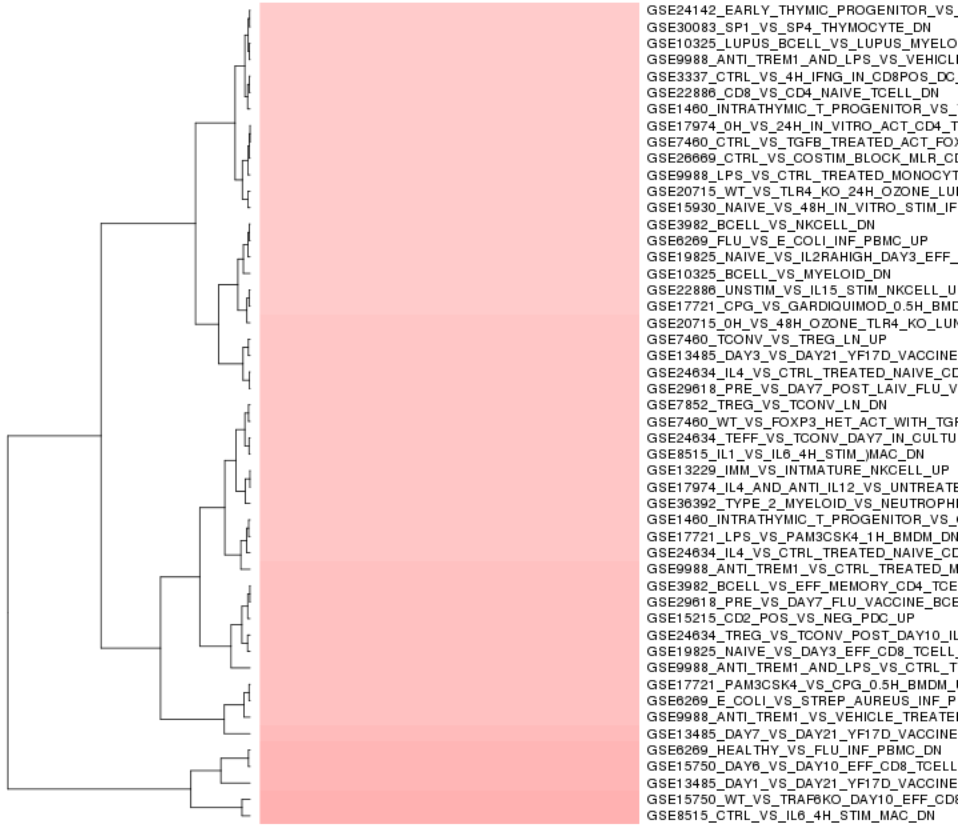

TF enrichment:

## Error: no locations are finite

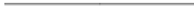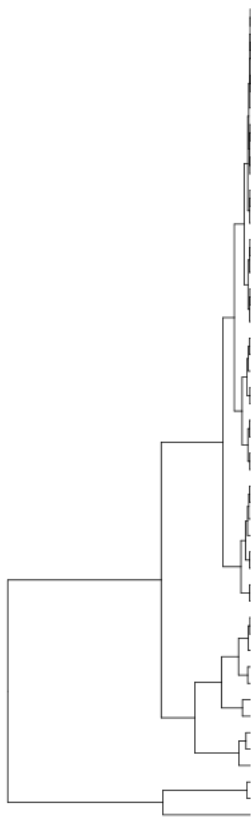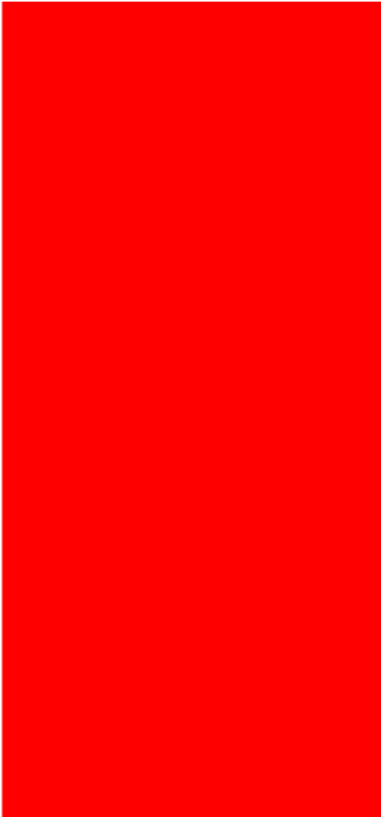

V\$LMO2COM\_01  
V\$ZIC3\_01  
V\$NFKAPPAB05\_01  
V\$HEN1\_01  
V\$HNF4\_DR1\_Q3  
V\$LYF1\_01  
V\$PAX4\_03  
TGCCAAAR\_V\$NFI\_Q6  
V\$E12\_Q6  
V\$PAX4\_01  
V\$AP1\_Q6  
CAGGTA\_V\$AREB6\_01  
TAATTA\_V\$CHX10\_01  
GCCNNNWTAAR\_UNKNOWN  
V\$PUI\_Q6  
V\$RP58\_01  
V\$NFKAPPAB\_01  
V\$AP2ALPHA\_01  
CTTTGA\_V\$LEF1\_Q2  
V\$LEF1\_Q6  
CTTTAAR\_UNKNOWN  
RNGTGGGC\_UNKNOWN  
V\$AP2GAMMA\_01  
GGGYGTGNY\_UNKNOWN  
V\$AP2\_Q3  
WGGAAATGY\_V\$TEF1\_Q6  
V\$CREL\_01  
TGCTGAY\_UNKNOWN  
GGGCGGR\_V\$SP1\_Q6  
CTGCAGY\_UNKNOWN  
GCANCTGNY\_V\$MYOD\_Q6  
V\$SP3\_Q3  
V\$HEB\_Q6  
V\$CP2\_01  
TTGTTT\_V\$FOXO4\_01  
RGAGGAARY\_V\$PUI\_Q6  
V\$SREBP1\_Q6  
TGANTCA\_V\$AP1\_C  
V\$AP2\_Q6\_01  
AACTTT\_UNKNOWN  
TGTTTG\_V\$HNF3\_Q6  
TGGAAA\_V\$NFAT\_Q4\_01  
CCCNNGGAR\_V\$OLF1\_01  
TGGNNNNNNKCCAR\_UNKNOWN  
CAGCTG\_V\$AP4\_Q5  
CTTTGT\_V\$LEF1\_Q2  
RYTTCCTG\_V\$ETS2\_B  
CAGGTG\_V\$E12\_Q6  
GGGAGGRR\_V\$MAZ\_Q6  
GGGTGRRR\_V\$PAX4\_Q3

TF zscore:

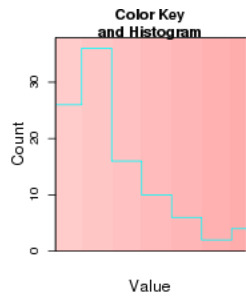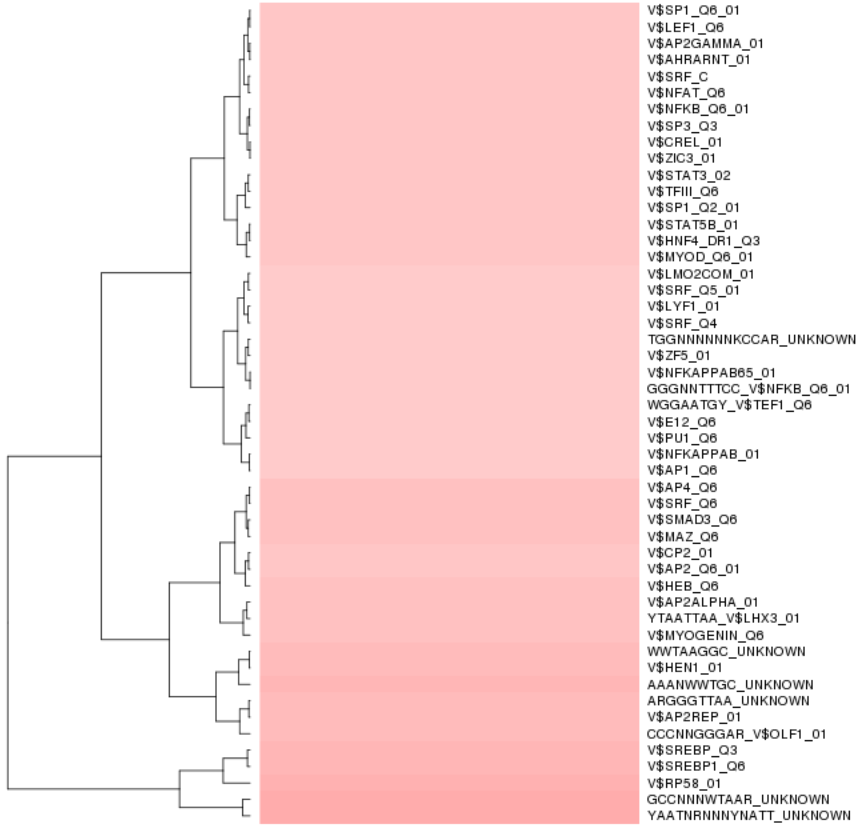

## GO enrichment

Cluster profiler used to call enrichments of significantly differentially regulated genes that map to Entrez IDs.



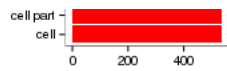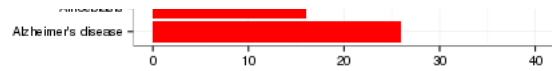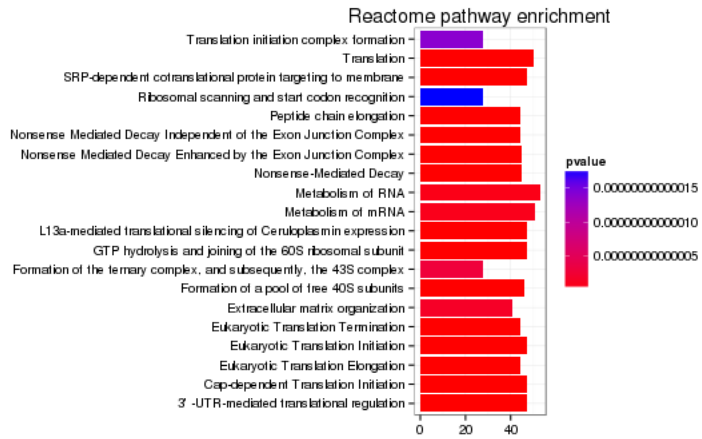

## Enrichment or depletion for stage-specific cell cycle markers

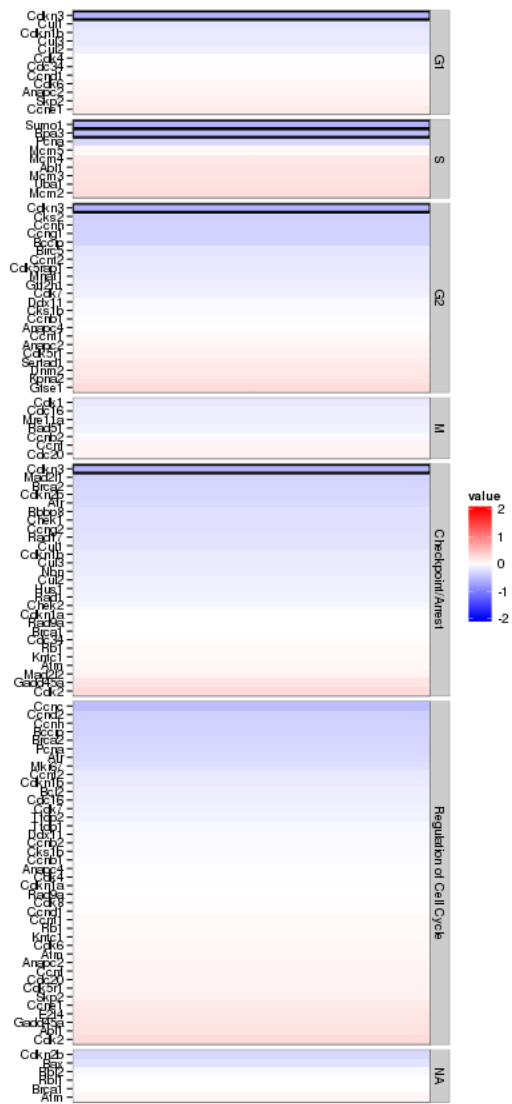

Enrichment or depletion for markers of specific cortical layers

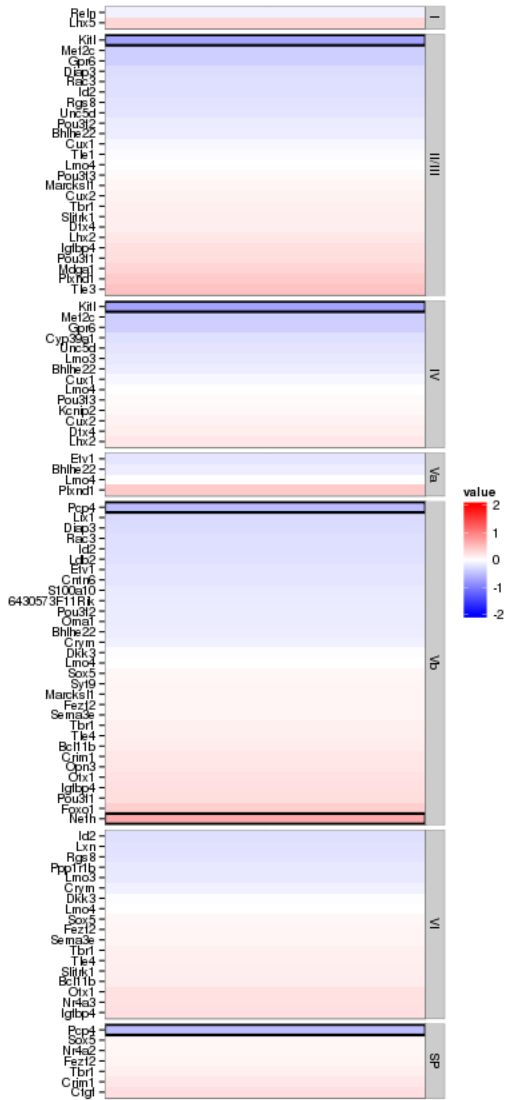

Enrichment or depletion for specific neural cell types



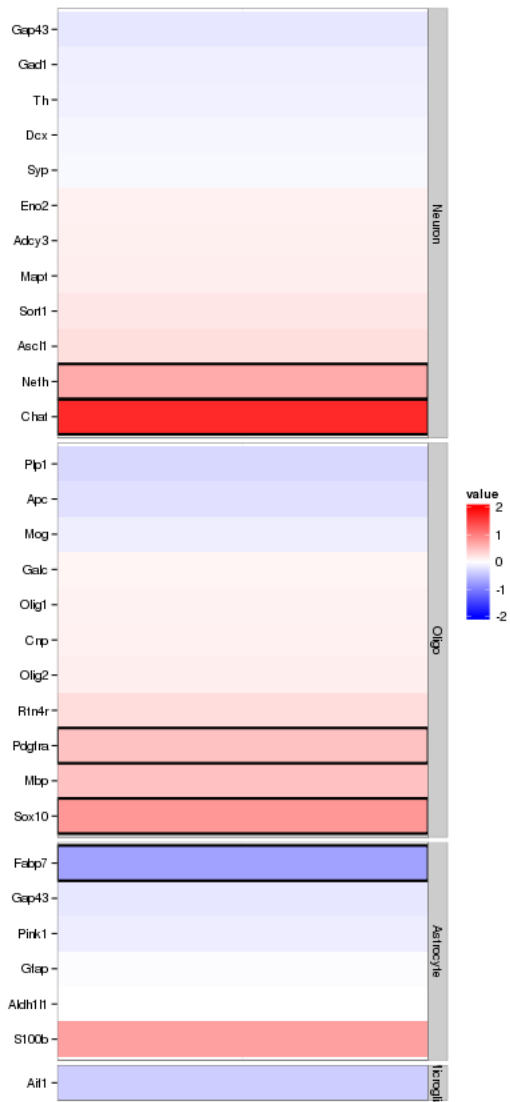

**Enrichment or Depletion of neural differentiation markers**

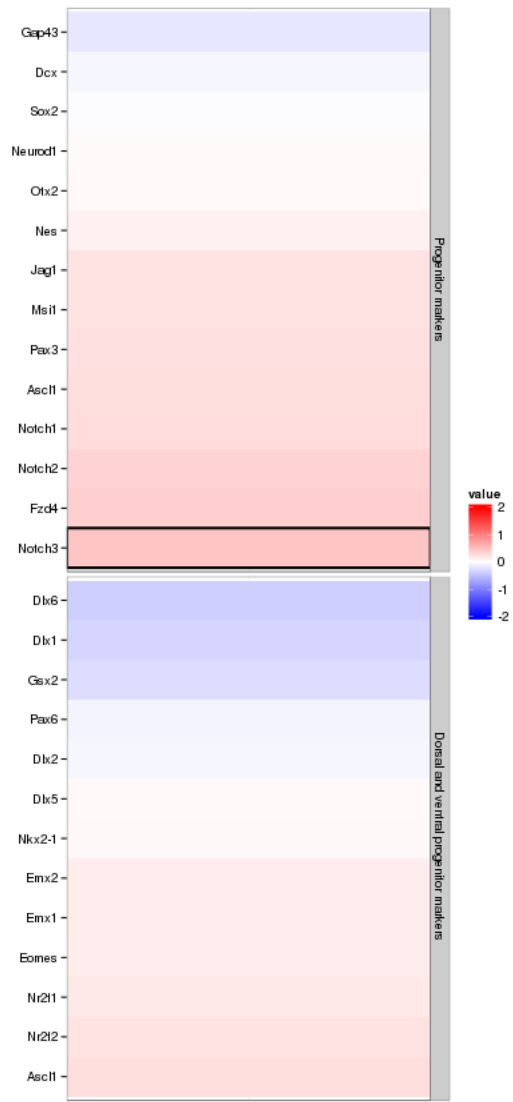

## Cis vs Trans (locally)

$\log_2$  Foldchange and test statistic are calculated with the ratio of  $\text{fpkm(KO)}/\text{fpkm(WT)}$ , thus the  $\text{test\_stat}$  is positive if a gene is higher in the KO and negative if a gene has lower expression in the KO

The pvalue for 3 genes significantly regulated in a region this size is: 0.3615

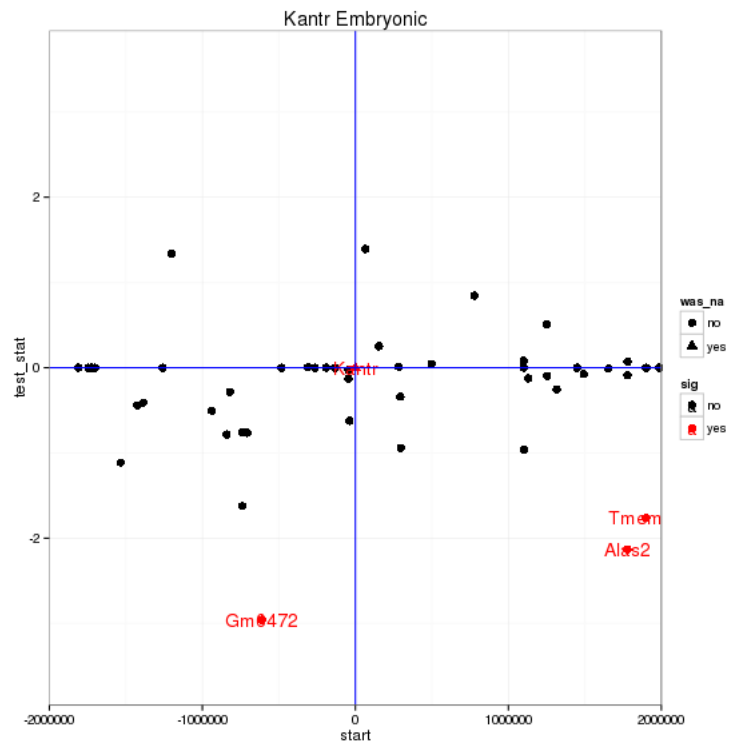

## Notes

Samples used are:

10

- 1 JR762
- 2 JR774
- 3 JR746
- 4 JR775
- 5 JR747
- 6 JR812

## Replicates

| file                                                                         | sample_name | replicate | rep_name | total_mass  | norm_mass   | internal_scale | external_scale |
|------------------------------------------------------------------------------|-------------|-----------|----------|-------------|-------------|----------------|----------------|
| 1 /n/rinn_data1/seq/igoff/Projects/BrainMap/data/quants/JR762/abundances.cxb | WT          | 0         | WT_0     | 32218100.00 | 33340200.00 | 0.95           | 1.00           |
| 2 /n/rinn_data1/seq/igoff/Projects/BrainMap/data/quants/JR774/abundances.cxb | WT          | 1         | WT_1     | 32505000.00 | 33340200.00 | 0.95           | 1.00           |
| 3 /n/rinn_data1/seq/igoff/Projects/BrainMap/data/quants/JR746/abundances.cxb | WT          | 2         | WT_2     | 27986400.00 | 33340200.00 | 0.83           | 1.00           |
| 4 /n/rinn_data1/seq/igoff/Projects/BrainMap/data/quants/JR775/abundances.cxb | Kantr       | 0         | Kantr_0  | 41486000.00 | 33340200.00 | 1.27           | 1.00           |

5 /n/rinn\_data1/seq/Igoff/Projects/BrainMap/data/quants/JR747/abundances.cxb Kantr  
6 /n/rinn\_data1/seq/Igoff/Projects/BrainMap/data/quants/JR812/abundances.cxb Kantr

|           |             |             |      |      |
|-----------|-------------|-------------|------|------|
| 1 Kantr_1 | 33582200.00 | 33340200.00 | 1.03 | 1.00 |
| 2 Kantr_2 | 34934000.00 | 33340200.00 | 1.08 | 1.00 |

## Session Info

```
## R version 3.0.2 (2013-09-25)
## Platform: x86_64-unknown-linux-gnu (64-bit)
##
## locale:
## [1] LC_CTYPE=en_US.UTF-8      LC_NUMERIC=C
## [3] LC_TIME=en_US.UTF-8      LC_COLLATE=en_US.UTF-8
## [5] LC_MONETARY=en_US.UTF-8  LC_MESSAGES=en_US.UTF-8
## [7] LC_PAPER=en_US.UTF-8    LC_NAME=C
## [9] LC_ADDRESS=C            LC_TELEPHONE=C
## [11] LC_MEASUREMENT=en_US.UTF-8 LC_IDENTIFICATION=C
##
## attached base packages:
## [1] grid      parallel  methods  stats    graphics grDevices utils
## [8] datasets base
##
## other attached packages:
## [1] plyr_1.8.1
## [2] stringr_0.6.2
## [3] seqbias_1.10.0
## [4] BSgenome.Mmusculus.UCSC.mm10_1.3.19
## [5] BSgenome_1.30.0
## [6] Biostrings_2.30.1
## [7] gdata_2.13.3
## [8] GO.db_2.10.1
## [9] org.Mm.eg.db_2.10.1
## [10] clusterProfiler_1.13.1
## [11] DOSE_2.0.0
## [12] ReactomePA_1.6.1
## [13] AnnotationDbi_1.24.0
## [14] Biobase_2.22.0
## [15] mgcv_1.7-29
## [16] nlme_3.1-117
## [17] RMySQL_0.9-3
## [18] RColorBrewer_1.0-5
## [19] gridExtra_0.9.1
## [20] gtable_0.1.2
## [21] marray_1.40.0
## [22] gplots_2.13.0
## [23] GSA_1.03
## [24] limma_3.18.13
## [25] xtable_1.7-3
## [26] cummeRbund_2.7.2
## [27] Gviz_1.6.0
## [28] rtracklayer_1.22.7
## [29] GenomicRanges_1.14.4
## [30] XVector_0.2.0
```

```

## [31] IRanges_1.20.7
## [32] fastcluster_1.1.13
## [33] reshape2_1.4
## [34] ggplot2_1.0.0
## [35] RSQLite_0.11.4
## [36] DBI_0.2-7
## [37] BiocGenerics_0.8.0
## [38] knitr_1.6
##
## loaded via a namespace (and not attached):
## [1] biomaRT_2.18.0      biovizBase_1.10.8  bitops_1.0-6
## [4] caTools_1.17       cluster_1.15.2     colorspace_1.2-4
## [7] dichromat_2.0-0    digest_0.6.4       DO.db_2.7
## [10] evaluate_0.5.5     formatR_0.10       Formula_1.1-1
## [13] GenomicFeatures_1.14.5 GOsemSim_1.20.3    graph_1.40.1
## [16] graphite_1.8.1     gtools_3.4.1       Hmisc_3.14-4
## [19] igraph_0.7.1       KEGG.db_2.10.1     KernSmooth_2.23-12
## [22] labeling_0.2       lattice_0.20-29    latticeExtra_0.6-26
## [25] MASS_7.3-33        Matrix_1.1-3       munsell_0.4.2
## [28] org.Hs.eg.db_2.10.1 proto_0.3-10       qvalue_1.36.0
## [31] Rcpp_0.11.2        RCurl_1.95-4.1     reactome.db_1.46.1
## [34] Rsamtools_1.14.3  scales_0.2.4       splines_3.0.2
## [37] stats4_3.0.2       survival_2.37-7    tcltk_3.0.2
## [40] tools_3.0.2        XML_3.98-1.1       zlibbioc_1.8.0

```

## Run Info

```

##      param
## 1    cmd_line
## 2    version
## 3  SVN_revision
## 4  boost_version
## 5    genome
##
## 1 cuffdiff -p 10 -L WT,Kantr -o /n/rinn_data1/seq/lgooff/Projects/BrainMap/data/diffs/Kantr_vs_WT_Embryonic /n/rinn_data1/seq/lgooff/Projects/BrainMap/dat
## 2
## 3
## 4
## 5

```

# linc-Brn1a KO vs WT (Adult)

This file shows the wt-v-ko comparison for linc-Brn1a.

Cuff overview:

```
## CuffSet instance with:  
## 2 samples  
## 26754 genes  
## 77524 isoforms  
## 0 TSS  
## 23066 CDS  
## 0 promoters  
## 0 splicing  
## 19954 relCDS
```

## QC

### Dispersion

Dispersion plot for genes in cuff: (Overdispersion can lead to innacurate quants)

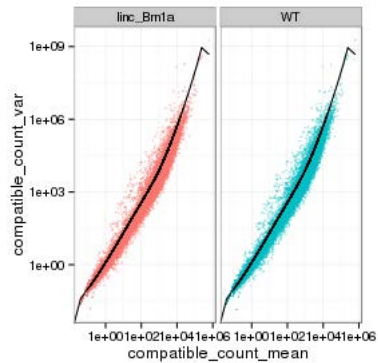

### Cross-replicate variability (fpkmSCVplot)

Differences in CV 2 can result in lower numbers of differentially expressed genes due to a higher degree of variability between replicate fpkm estimates.

Genes:

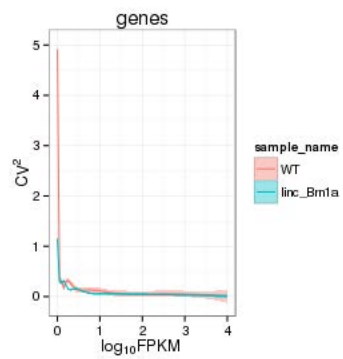

Isoforms:

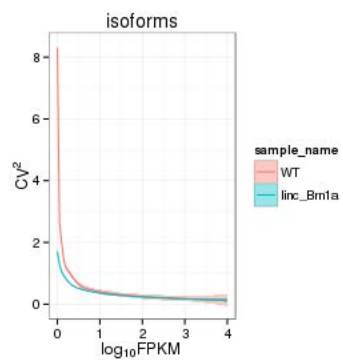

MvA plot

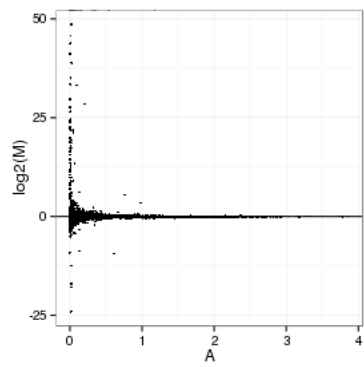

MvA plot counts

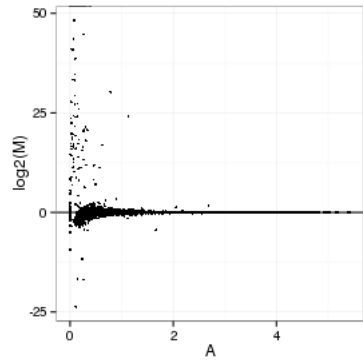

## Scatterplot matrix

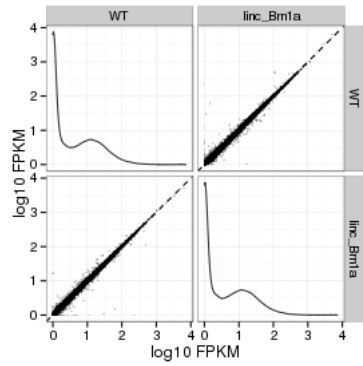

## Distributions

### Boxplots

Boxplot (genes)



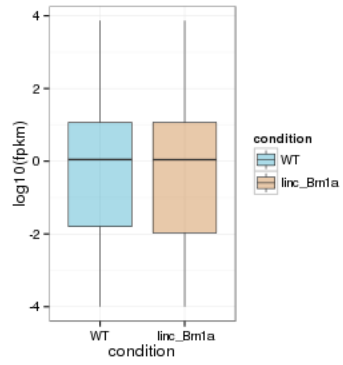

Boxplot (genes, replicates)

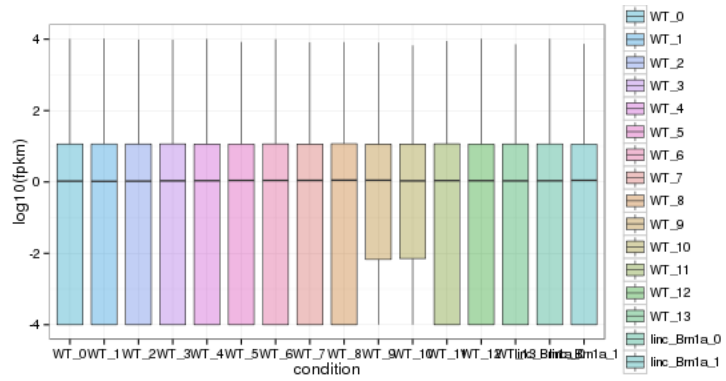

Boxplot (isoforms)

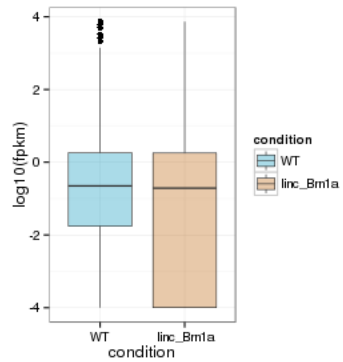

Boxplot (isoforms, replicates)

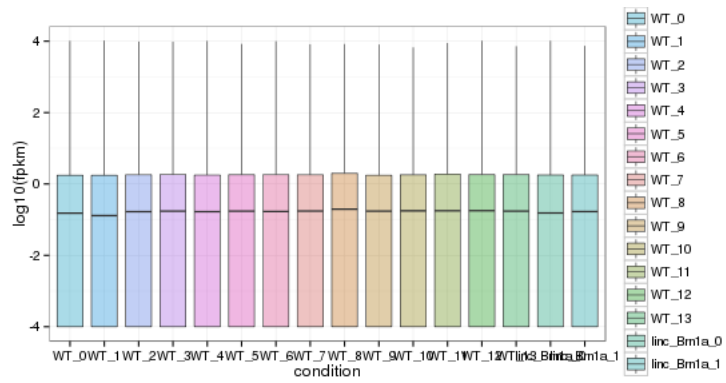

## Density

Density (genes)

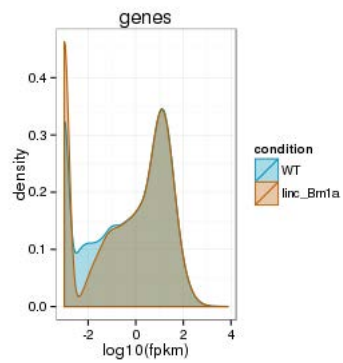

Density (genes, replicates)

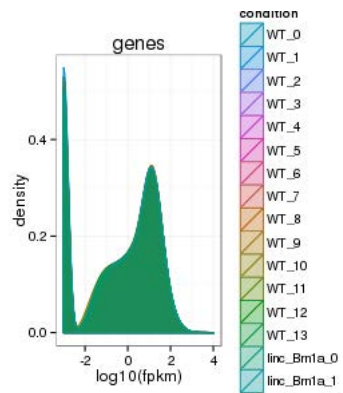

# Clustering

## Replicate Clusters

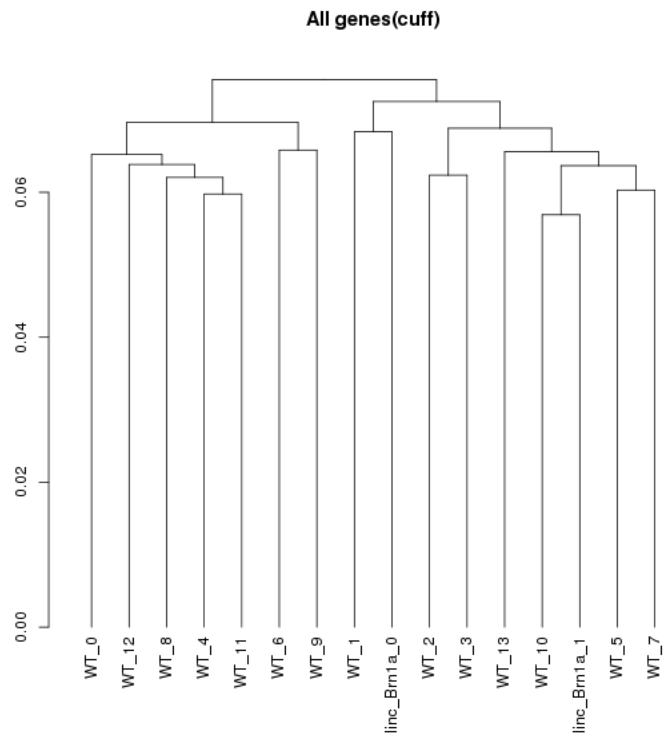

## NULL

## PCA (genes)

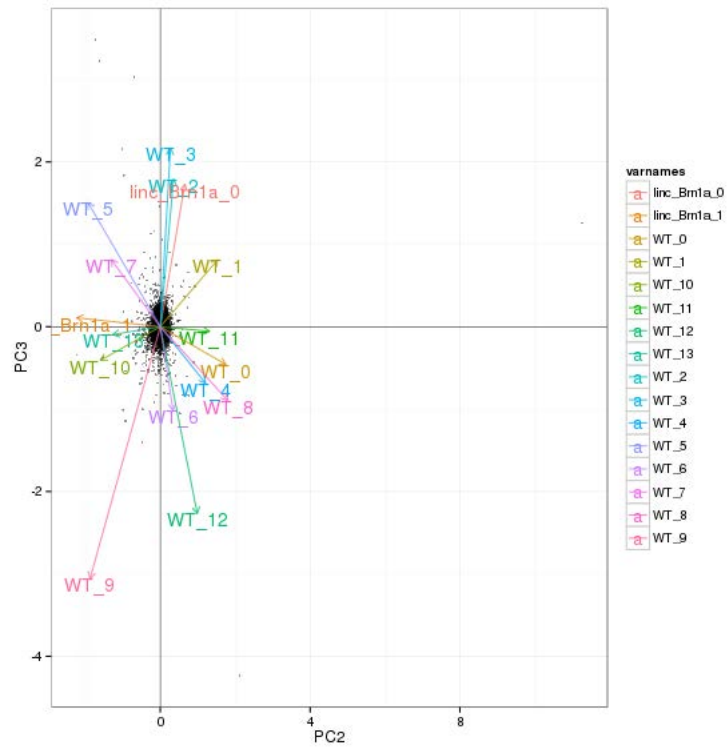

**MDS (genes)**

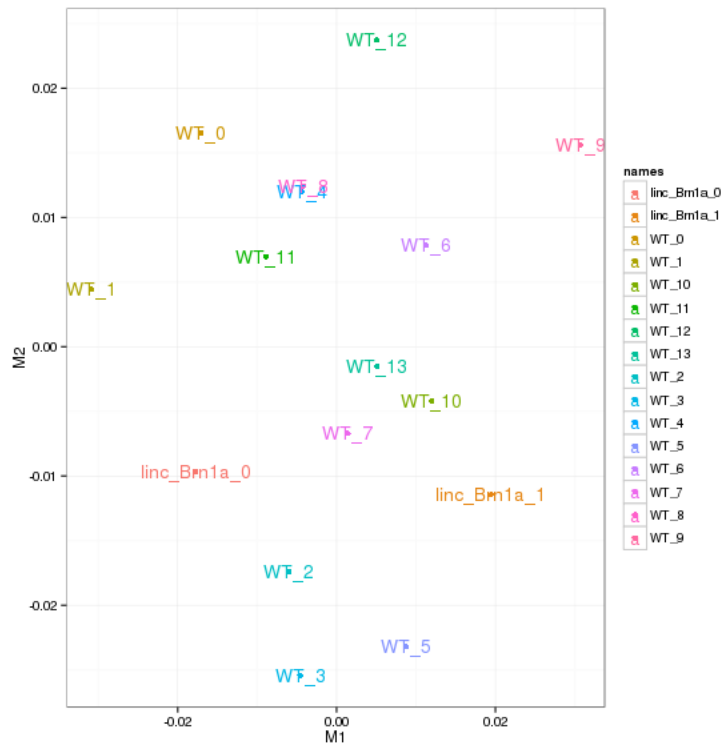

**KO assessment**  
**Endogenous lncRNA expression**

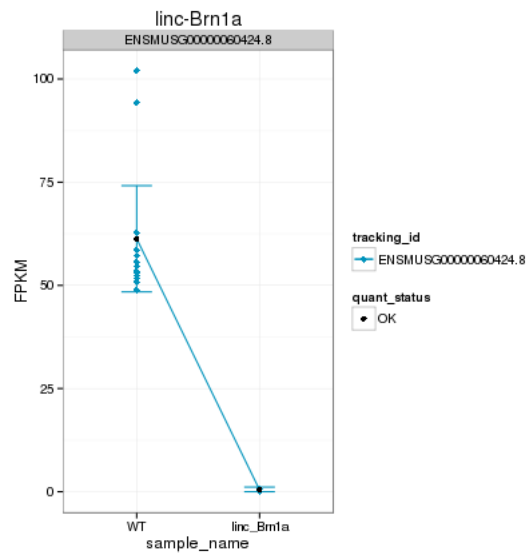

Endogenous expression of linc-Brn1a isoforms:

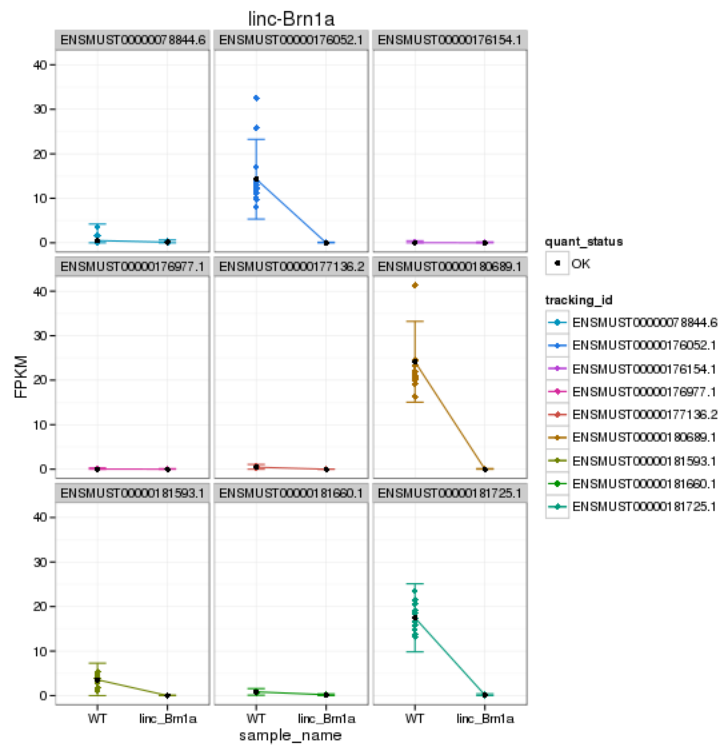

Barplot of gene expression:

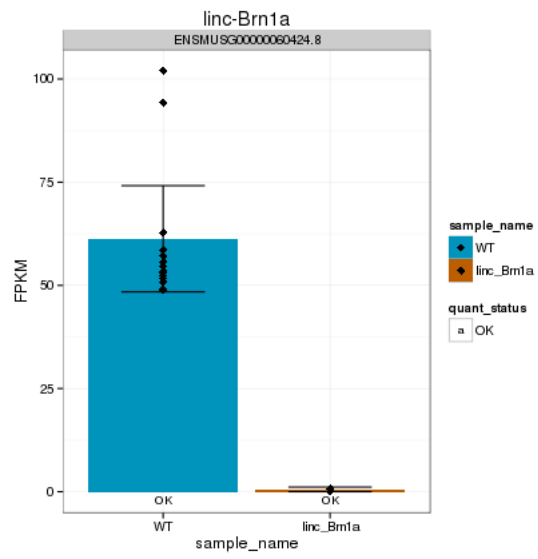

Barplot of isoform expression:



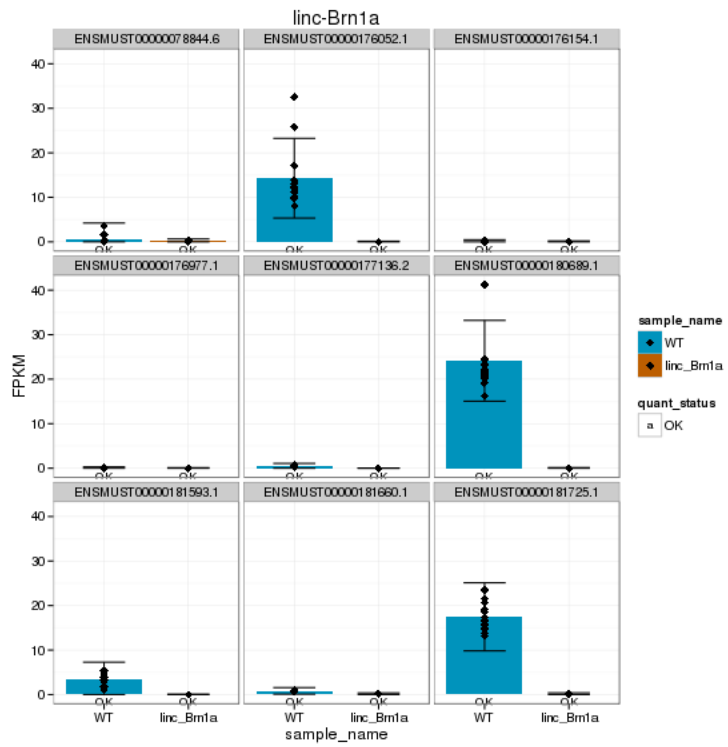

## LacZ expression

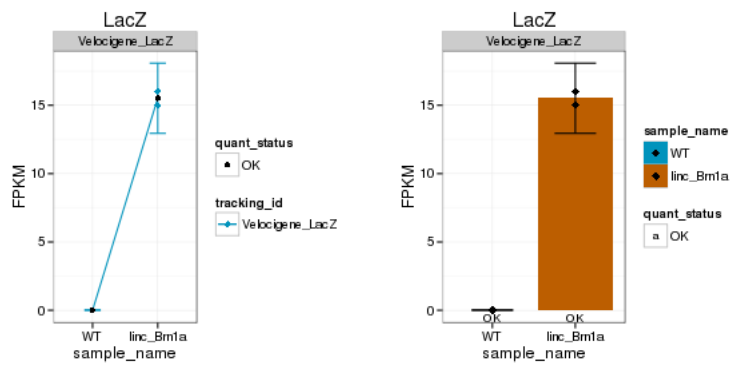

## Digital Genotyping (LacZ vs Endogenous lincRNA and Sex)

Eif2s3y is a y-expressed gene, Xist is an x-expressed gene Expression plot (endogenous linc, lacZ, Y-expressed gene):

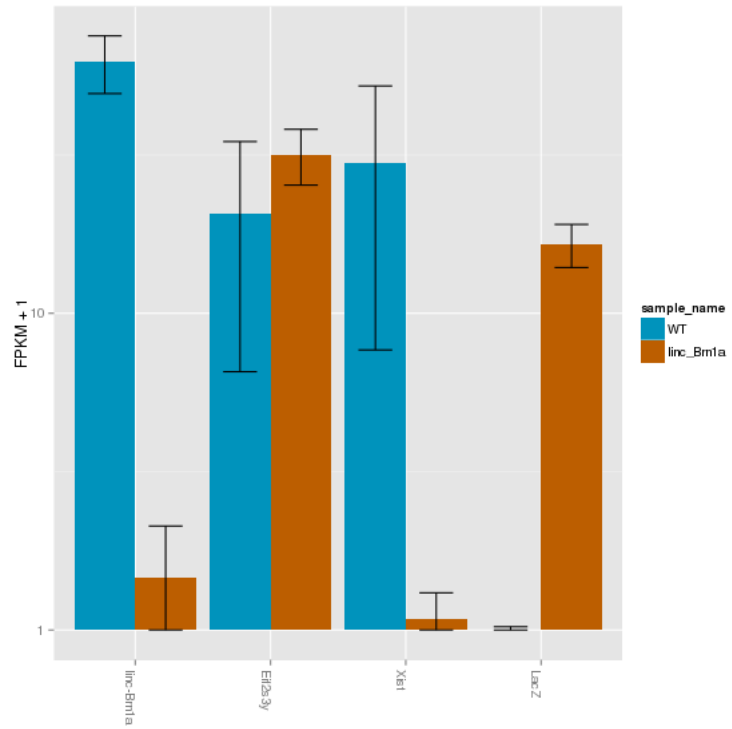

Expression heatmap:

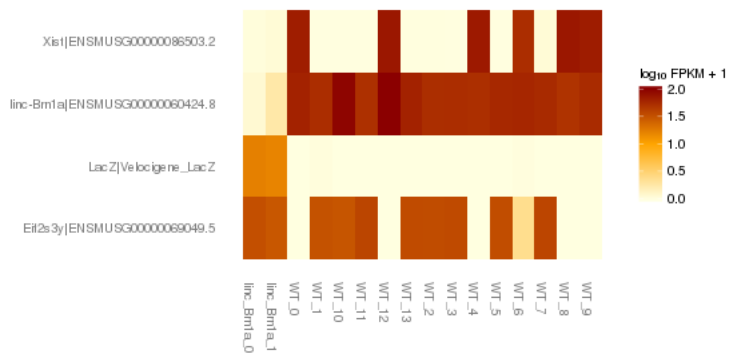

Track visualization

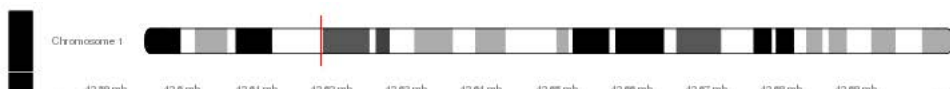

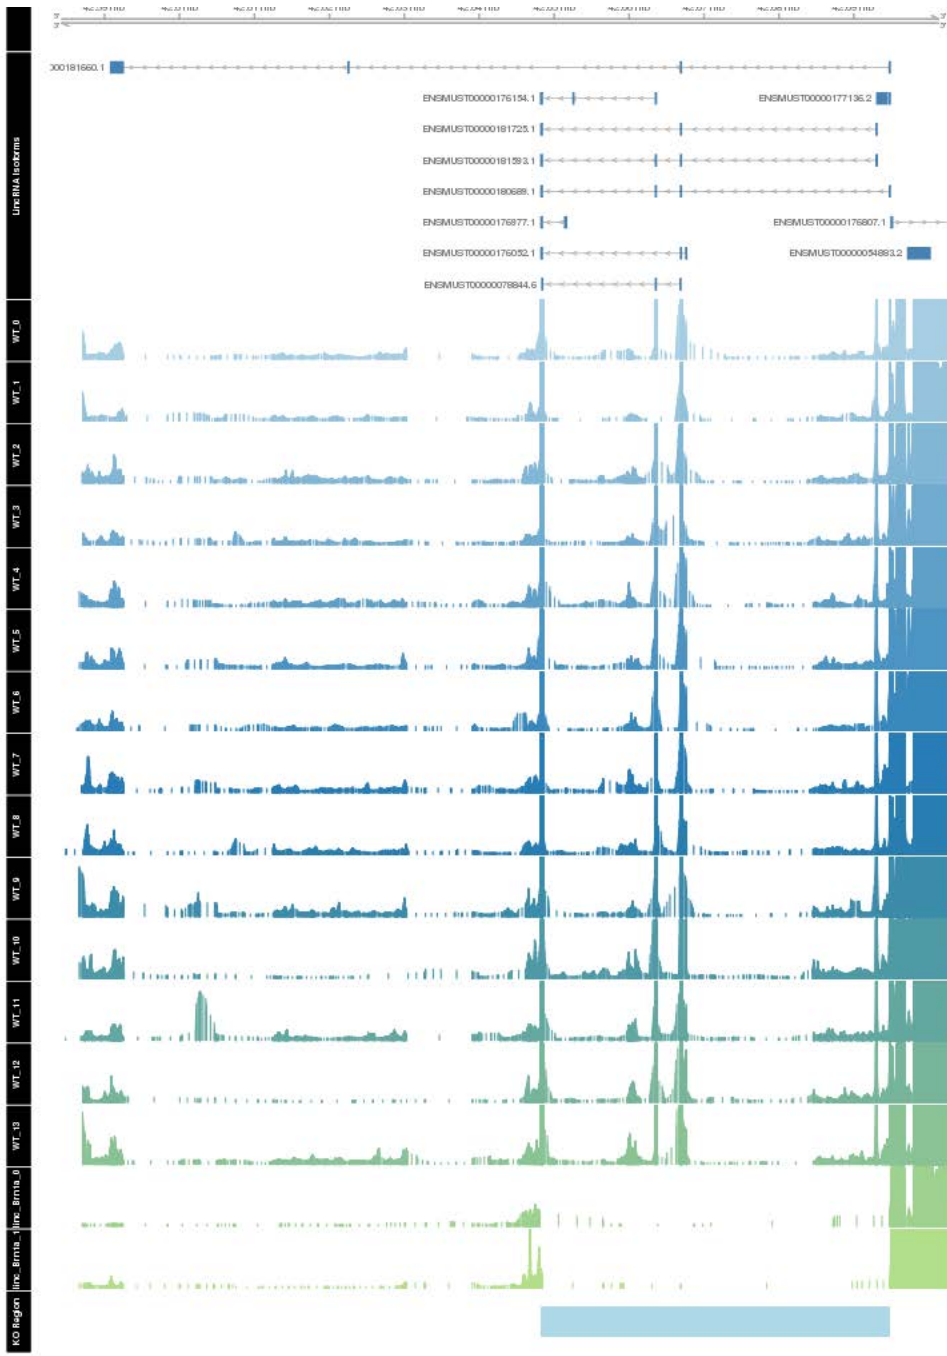

# Differential Analysis

## Differential Genes

There are 74 significantly differentially expressed genes. They are:

```
geneAnnot$gene_short_name
1 Rec8
2 Arrdc2
3 Fosb
4 Dio2
5 Mertk
6 Hspa8
7 Vip
8 Fabp7
9 Sgk1
10 Mybpc1
11 Btg2
12 Xbp1
13 Fos
14 Rgcc
15 Dnajc3
16 Arc
17 Sdf2l1
18 Nr4a1
19 Cdkn1a
20 Sik1
21 Xdh
22 Dusp1
23 Fkbp5
24 Il33
25 Pdia4
26 Paqr8
27 Mcm6
28 Tfcp2l1
29 Hspa5
30 Cyr61
31 Nr4a3
32 Alad
33 Slc2a1
34 Mfsd2a
35 Adipor2
36 Abcc9
37 Pglyrp1
```

38 Hddc3  
39 Tsc22d3  
40 Cryab  
41 Ldlr  
42 Ndn  
43 Igsf9b  
  
44 Cbl  
45 Nostrin  
46 Lars2  
47 Anln  
48 Tob1  
49 Egr2  
50 Smim3  
51 Egr1  
52 Hdhd3  
53 Daam2  
54 Tlr7  
55 Npas4  
56 Nrros  
57 Ccdc171  
58 Jun  
59 Junb  
60 Ier2  
61 Per2  
62 Kdm5d  
63 linc-Bm1a  
64 Usp31  
65 Zbtb16  
66 Ddx3y  
67 Kihl9  
68 Egr4  
69 Gm7292  
70 Xist  
  
71 Cdr1  
72 AA465934  
73 Gm6472  
74 Gm26924

## Matrix of gene significant differences between conditions

(skip for Brainmap wt-v-ko comparisons)

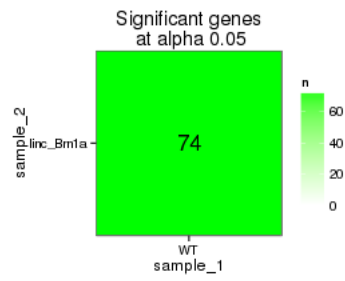

## Significant gene expression differences between conditions

Expression plot (genes):(turned off)

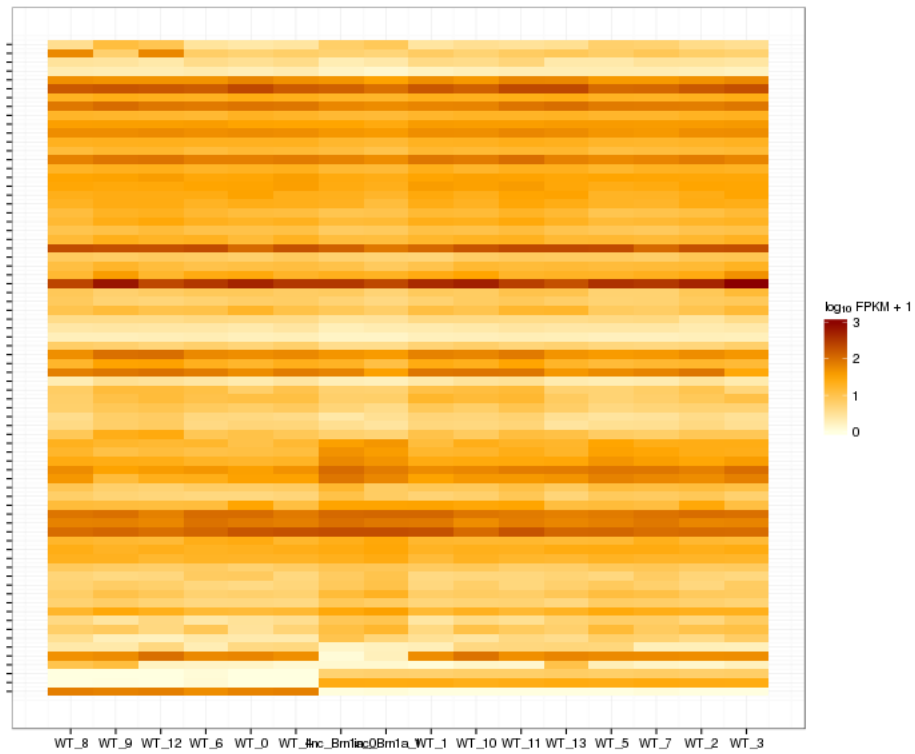

Significant genes with expression >50fpkm (any condition):(turned off)

An individual look at each of the highly expressed significantly differentially regulated genes: (eval=false for first pass)

# Expression-level/significance relationship

Scatter plot of significant genes only:

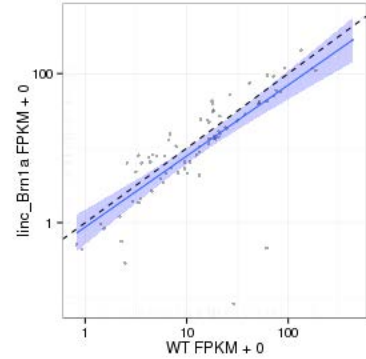

Volcano Plot

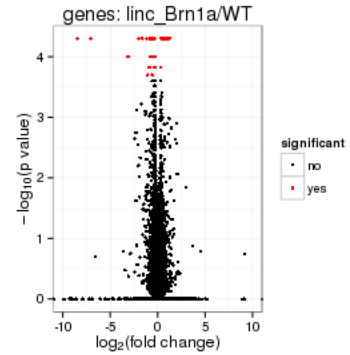

Volcano plot with significant genes only:





Per isoform difference between conditions:

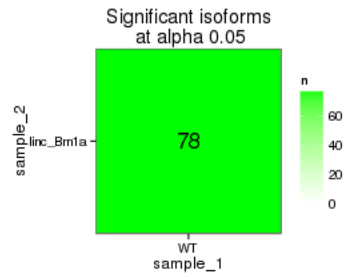

These isoforms are:

**isoAnnot\$gene\_short\_name**

- 1 Rec8
- 2 Arrdc2
- 3 Fosb
- 4 Hif3a
- 5 Dio2
- 6 Mertk
- 7 Hspa8
- 8 Vip
- 9 Fabp7
  
- 10 Cpm
- 11 Tns3
- 12 Btg2
- 13 Xbp1
- 14 Atp2a3
- 15 Fos
- 16 Arc
- 17 Zbtb20
- 18 Sdf2l1
- 19 Nr4a1
- 20 Cdkn1a
- 21 Sik1
- 22 Xdh
- 23 Atp6v0c
- 24 Dusp1
- 25 Fkbp5
- 26 Il33

27 Pdia4  
28 Paqr8  
29 Tfcp2l1  
30 Hspa5  
31 Cyr61  
32 Alad  
33 Slc2a1  
34 Mfsd2a  
35 Ago3  
36 Map3k6  
  
37 Ccnl2  
38 Adipor2  
39 Pglyrp1  
40 Hddc3  
41 Tsc22d3  
42 Cryab  
43 Kdm4a  
44 Ndn  
45 Vps8  
46 Igsf9b  
47 Cbl  
48 Anln  
49 Kirrel2  
50 Egr2  
51 Smim3  
52 Egr1  
53 Hdhd3  
54 Eltd1  
55 Daam2  
56 Dmtf1  
57 Npas4  
58 Ezr  
59 Jun  
60 Junb  
61 Ier2  
62 Per2  
63 Kdm5d  
  
64 Usp31  
  
65 Sepp1  
66 Zbtb16  
67 Ddx3y  
68 Ahnak

- 69 Kihl9
- 70 Egr4
- 71 Gm7292
- 72 Xist
- 73 Cdr1
- 74 Malat1
- 75 Gm6472
- 76 Gm26924

Gene-level DE isoform heatmap

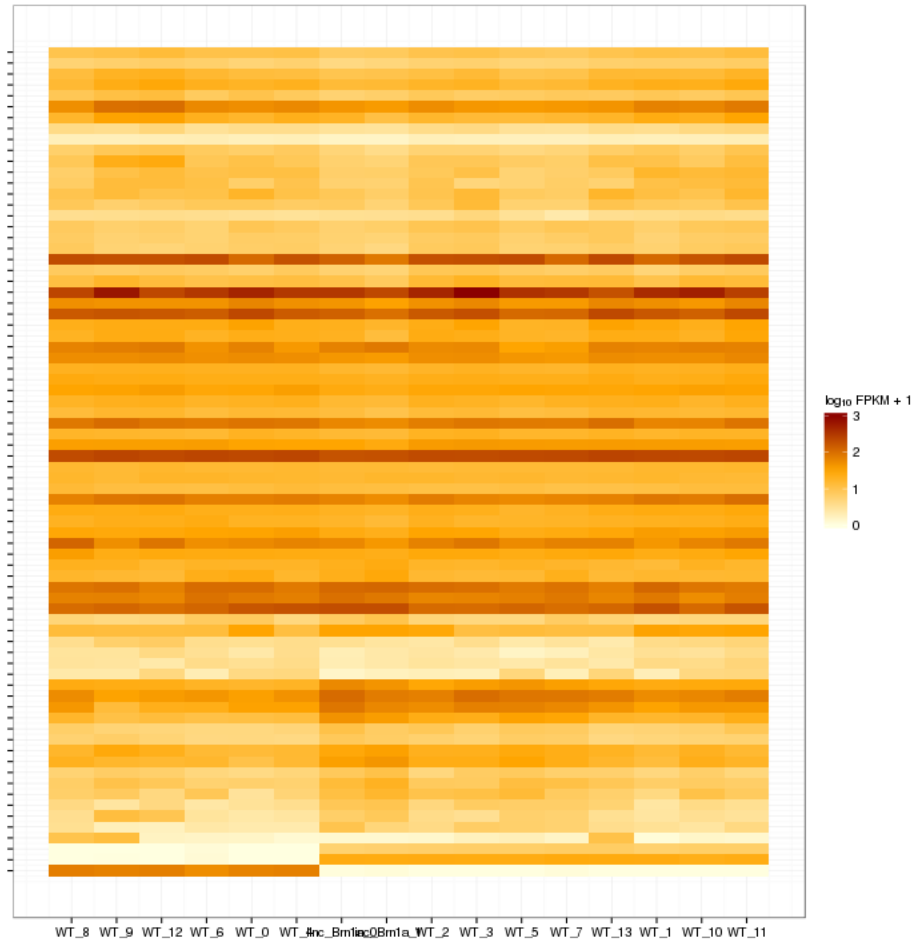

Isoform foldchange heatmap by isoform:

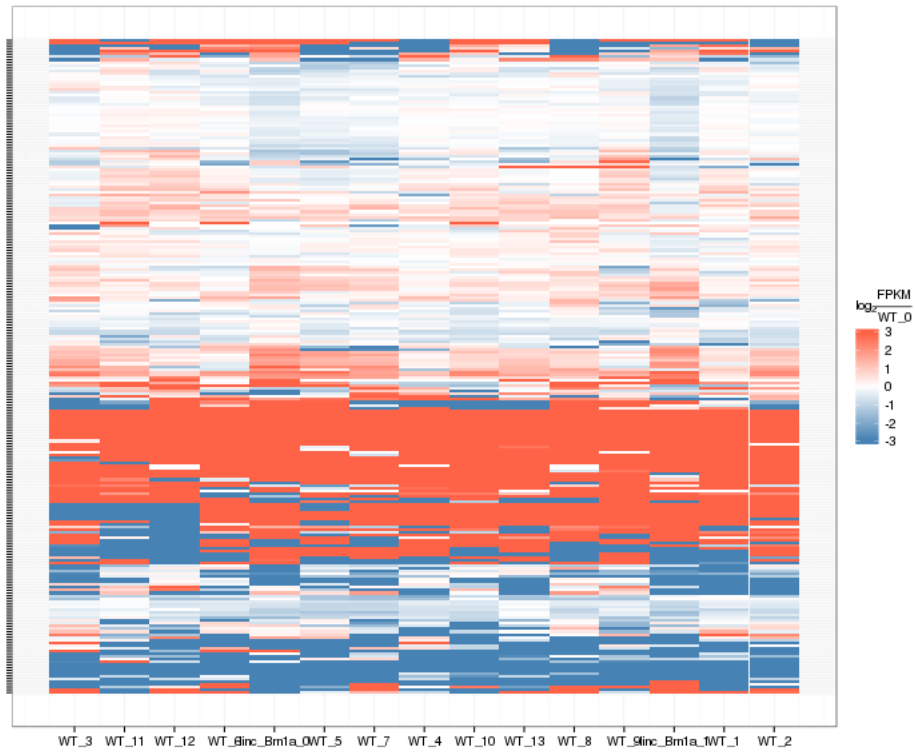

## Differential Splicing between conditions

(eval false for first pass)

Per condition differences in isoforms (Does gene have diff piechart between conditions?)

These genes are:

Splicing heatmap by isoform:

Splicing heatmap by gene

The following are significantly differentially spliced genes (relative portion of isoform per condition):

## Gene/Pathway Analysis

### GSEA

Enrichment and zscores are calculated based on expression in KO vs WT ( $\text{fpkm}_{\text{KO}}/\text{fpkm}_{\text{WT}}$ ), so genes that are down regulated in KO are shown in blue, while upregulation is shown in red.

KO/WT Blue = down in KO Red = Up in KO

Biocarta enrichment:

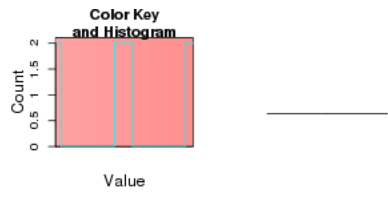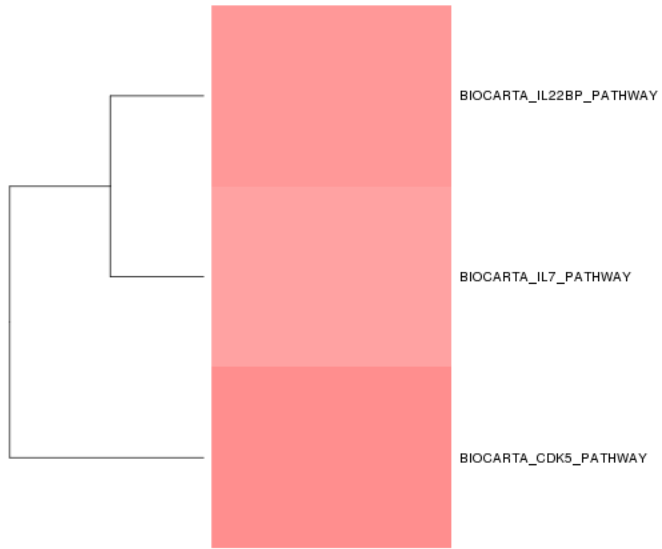

Biocarta zscore:

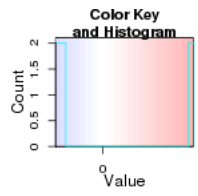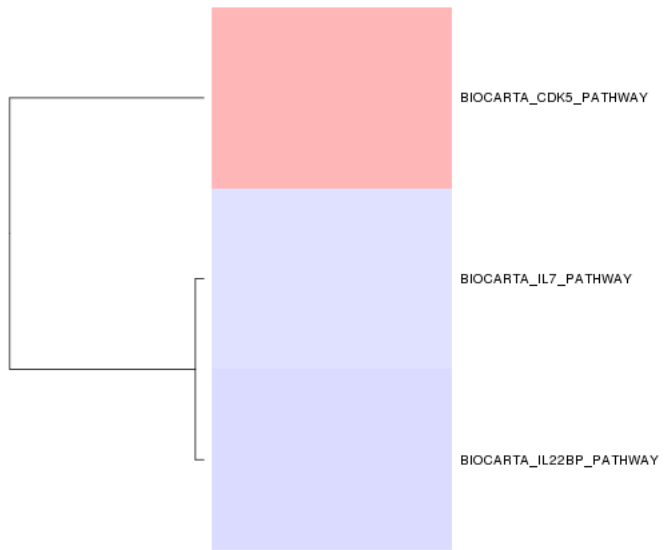

Reactome enrichment:

```
## Error: subscript out of bounds
```

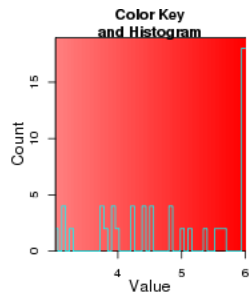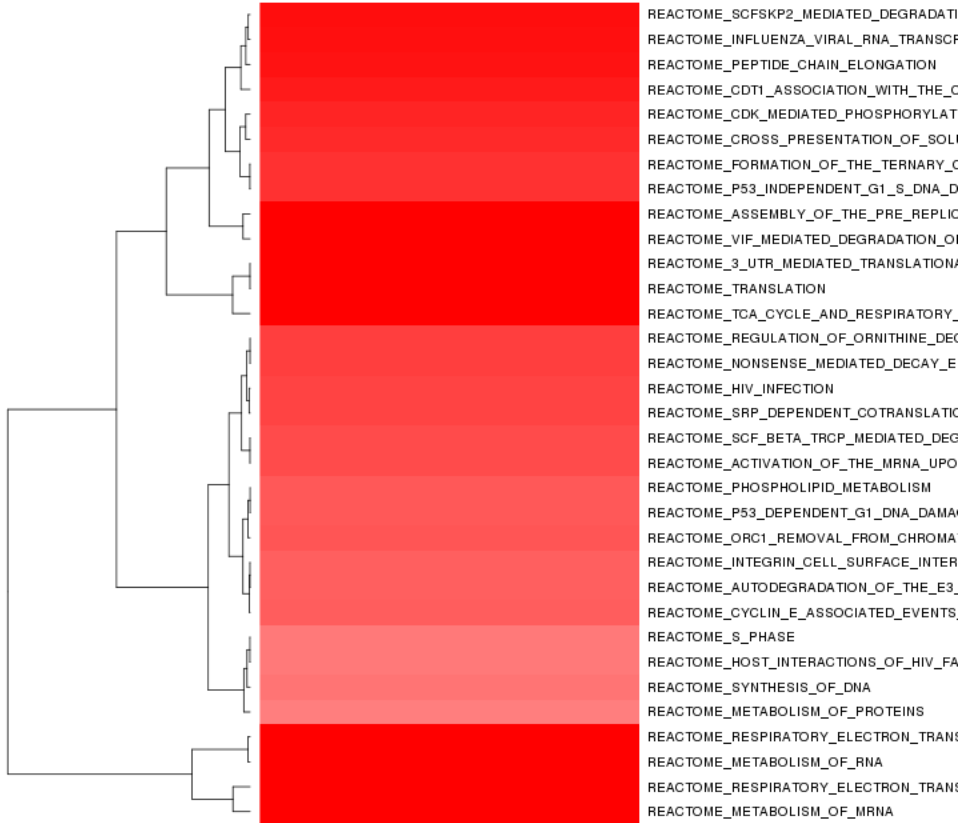

Reactome zscore:

## Error: subscript out of bounds

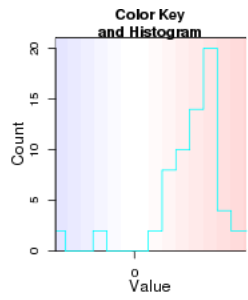

\_\_\_\_\_

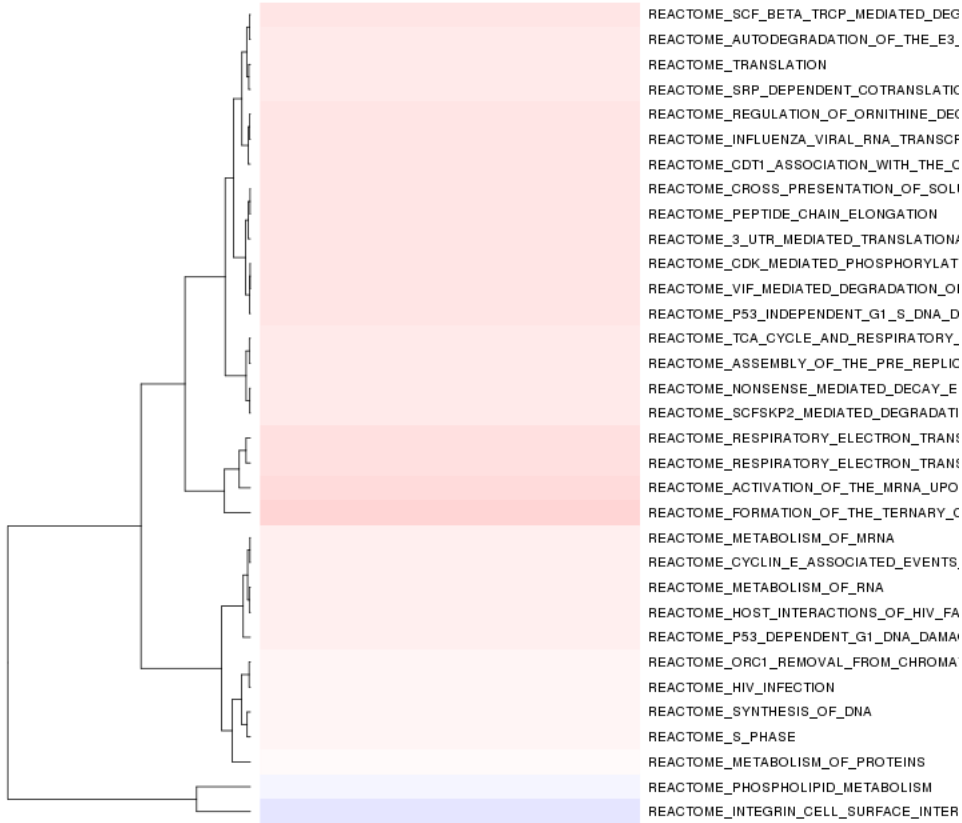

Kegg enrichment:



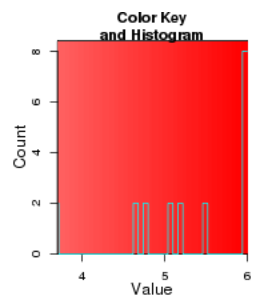

\_\_\_\_\_

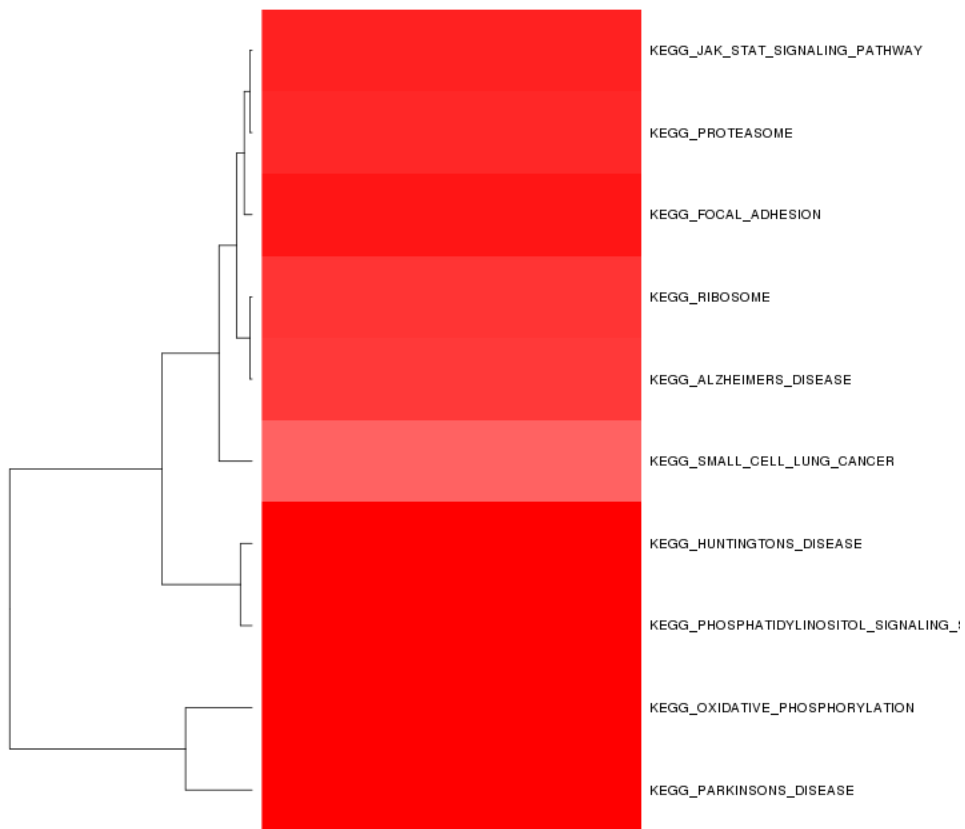

Kegg zscore:

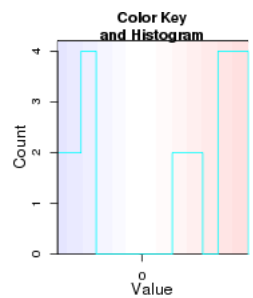

\_\_\_\_\_

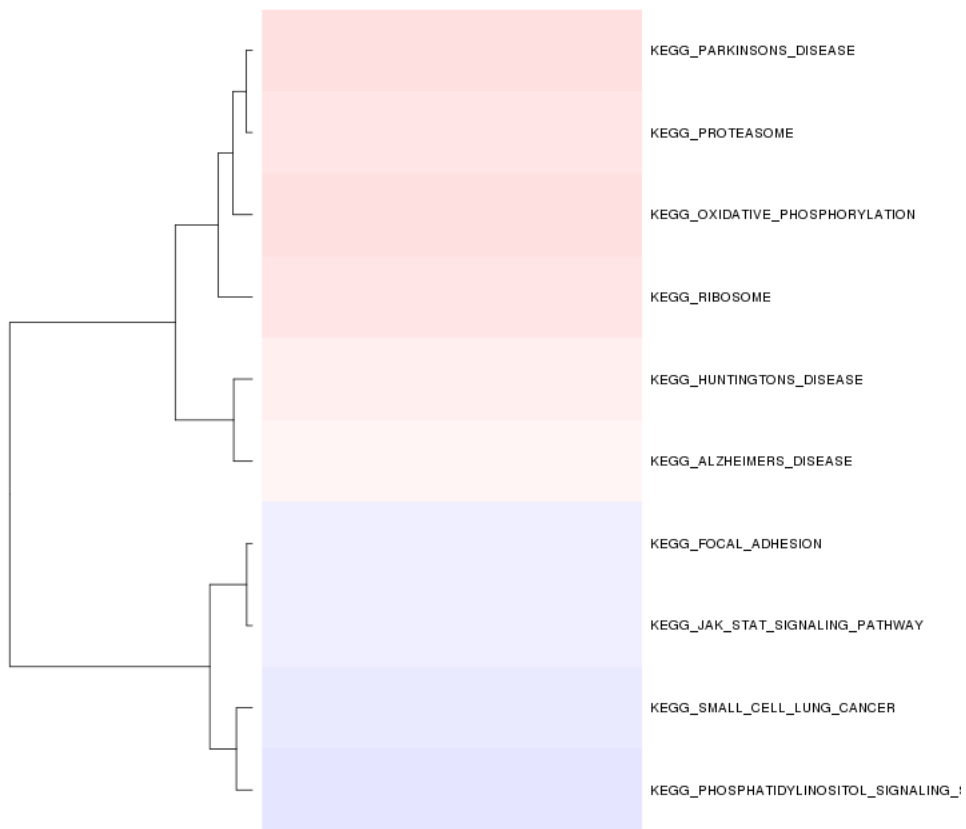

Interneuron enrichment:

## Error: no locations are finite



5HT\_genes

Lhx6\_genes

Interneuron zscore:

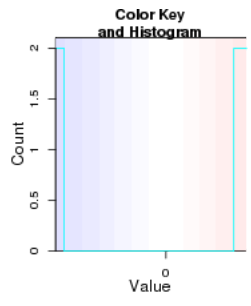

—

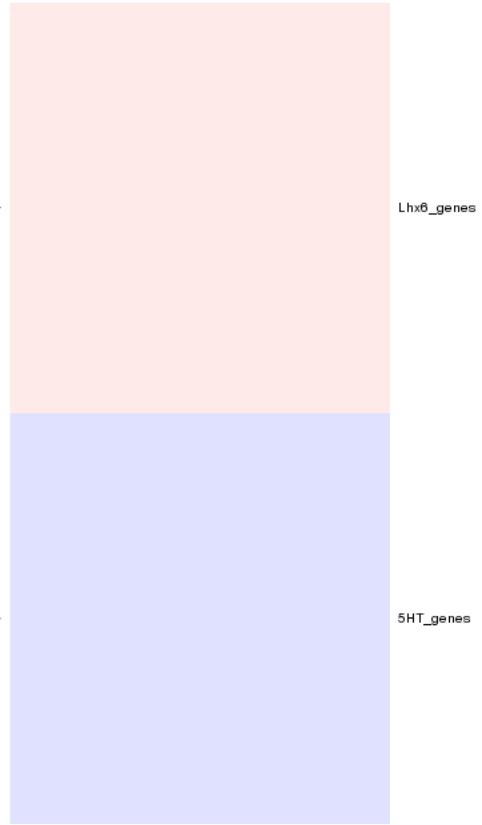

Oncogene enrichment:

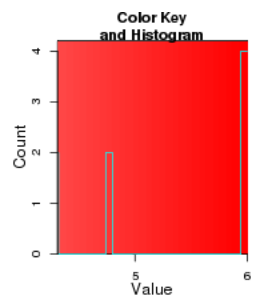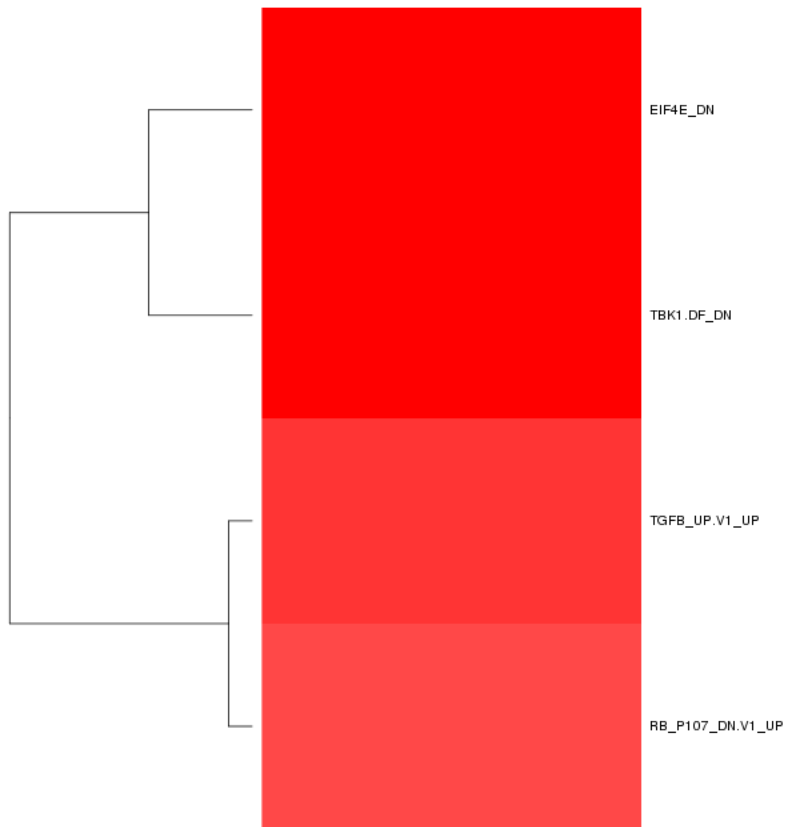

Oncogene zscore:

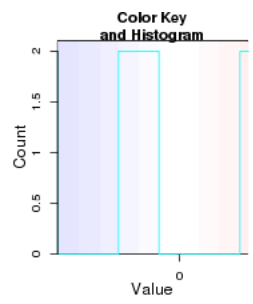

\_\_\_\_\_

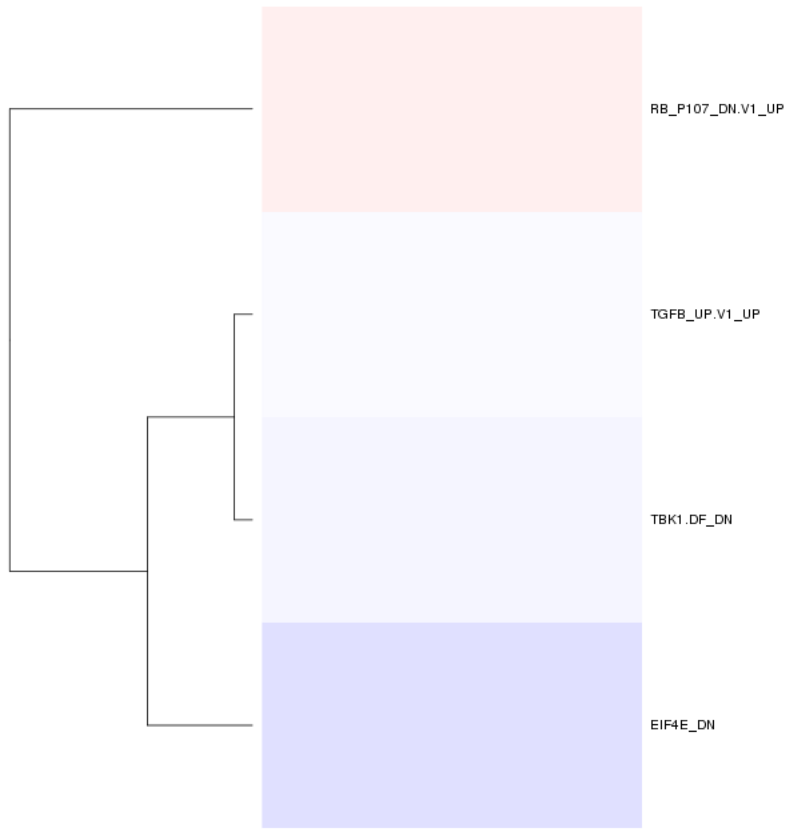

Immuno enrichment:

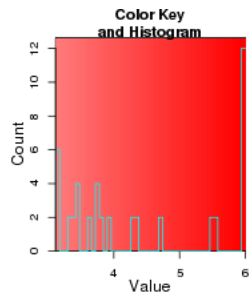

\_\_\_\_\_

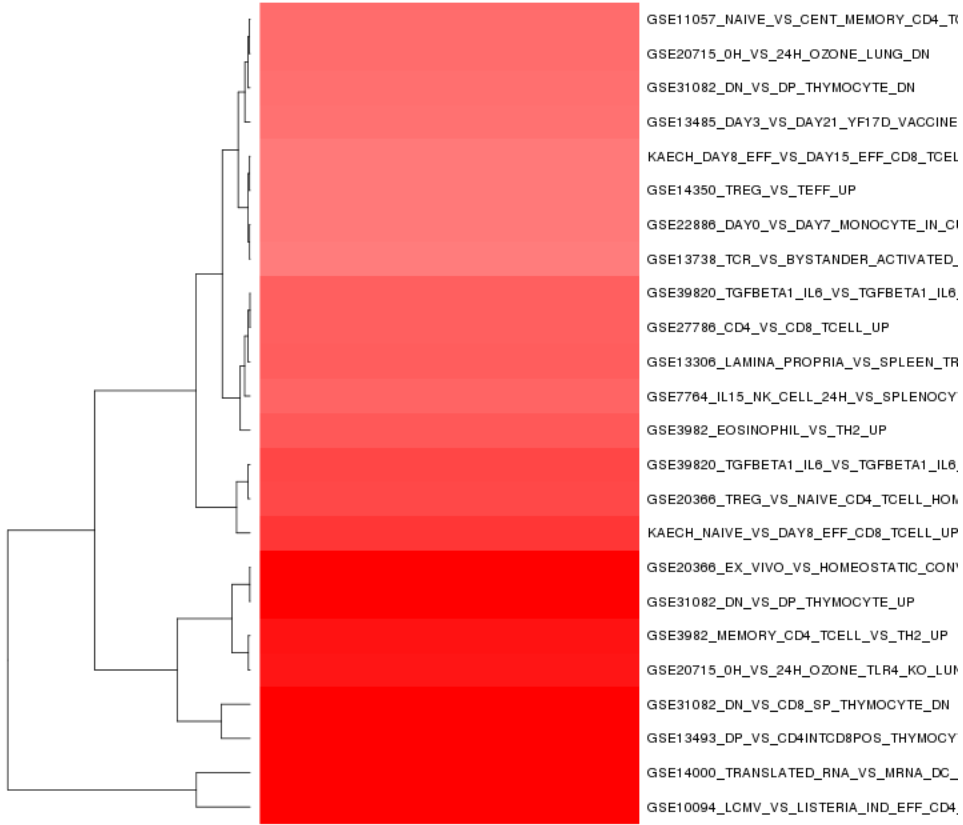

Immuno zscore:





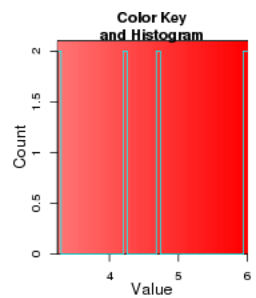

\_\_\_\_\_

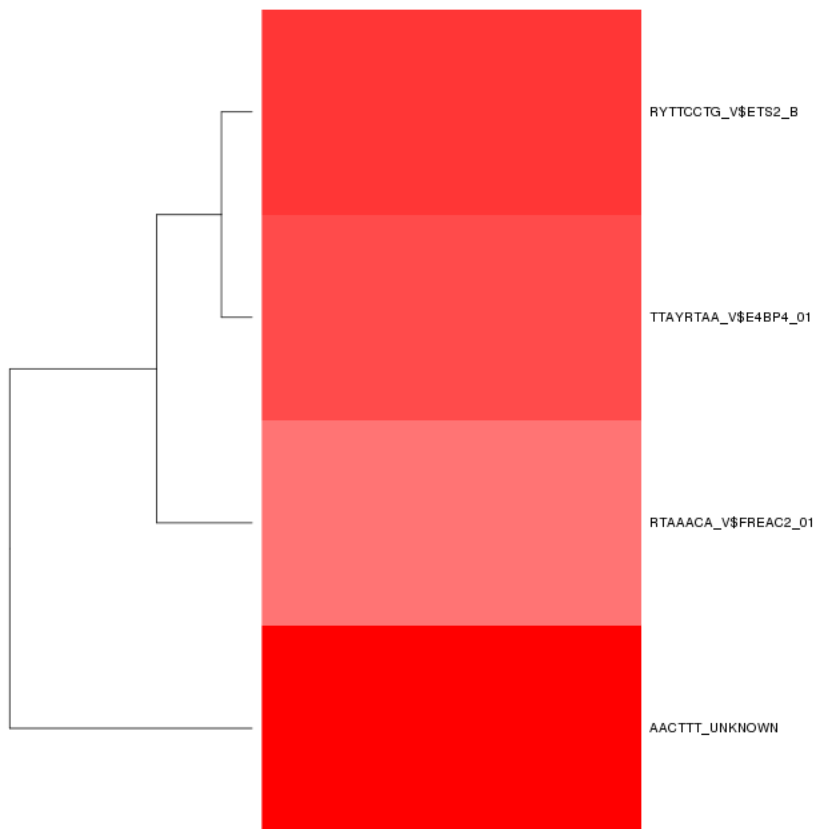

TF zscore:

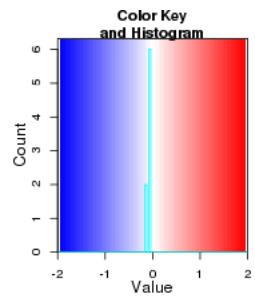

\_\_\_\_\_

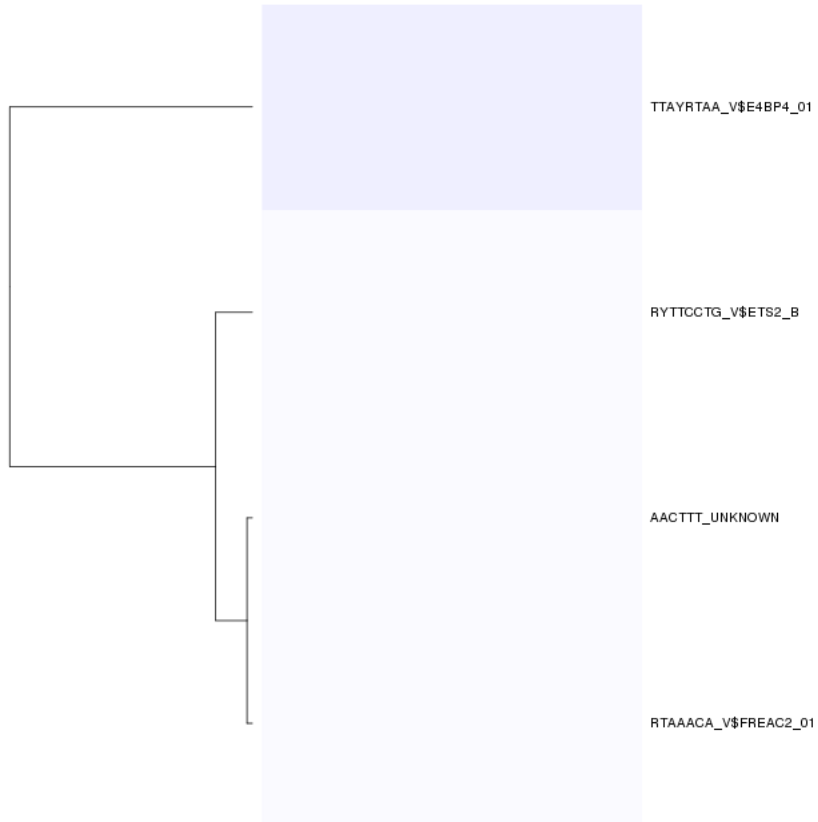

## GO enrichment

Cluster profiler used to call enrichments of significantly differentially regulated genes that map to Entrez IDs.

```
## [1] "ERROR: The estimated pi0 <= 0. Check that you have valid p-values or use another lambda method."
```

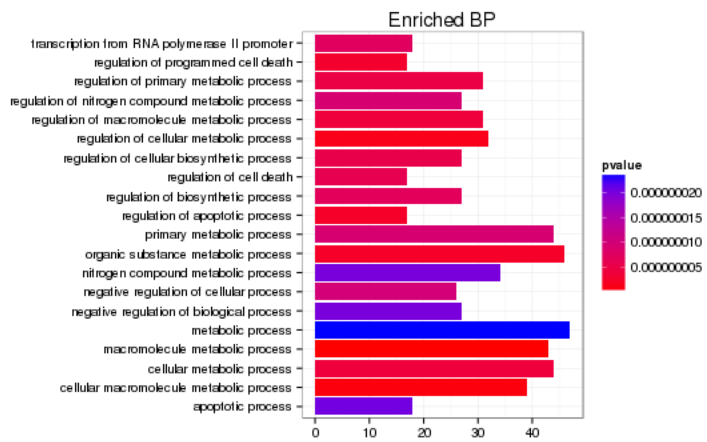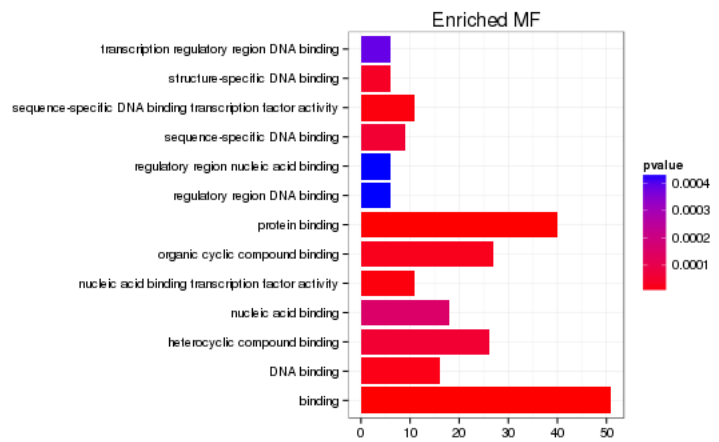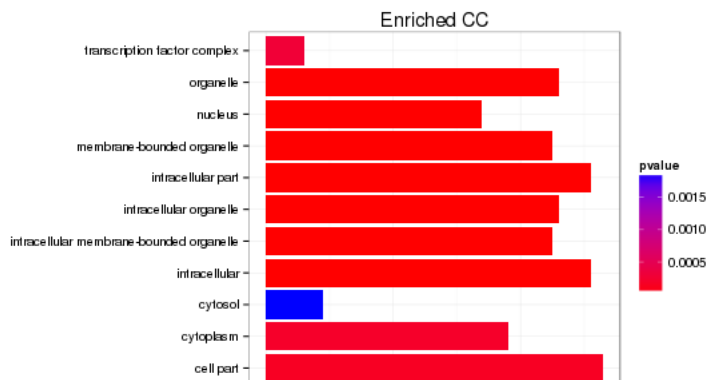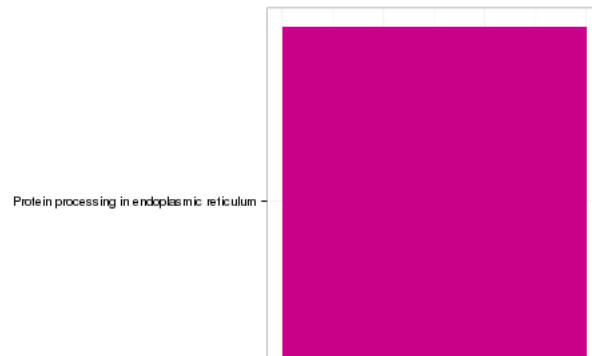

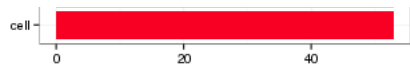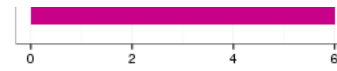

```
## Error: 'x' and 'units' must have length > 0
```

## Enrichment or depletion for stage-specific cell cycle markers



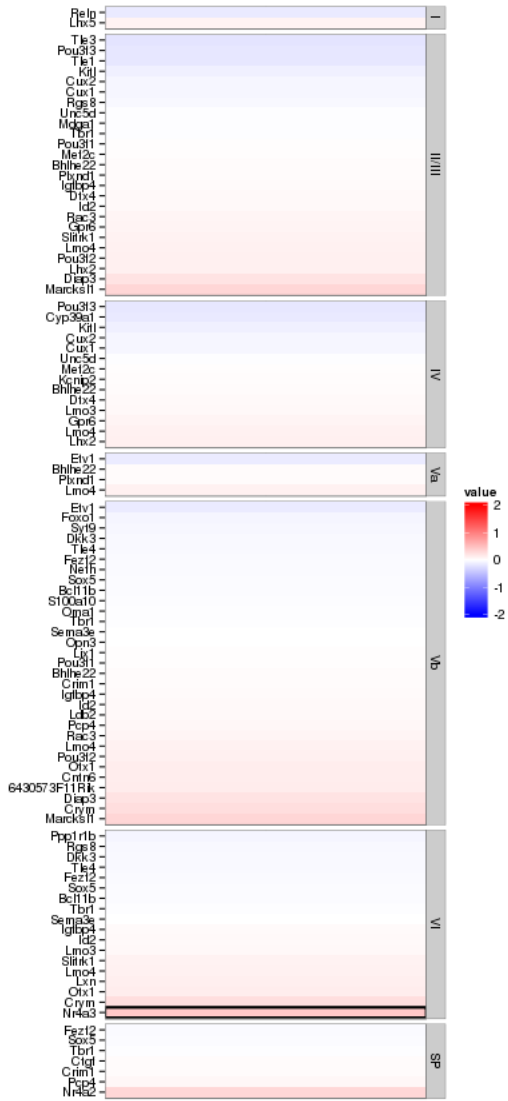

Enrichment or depletion for specific neural cell types

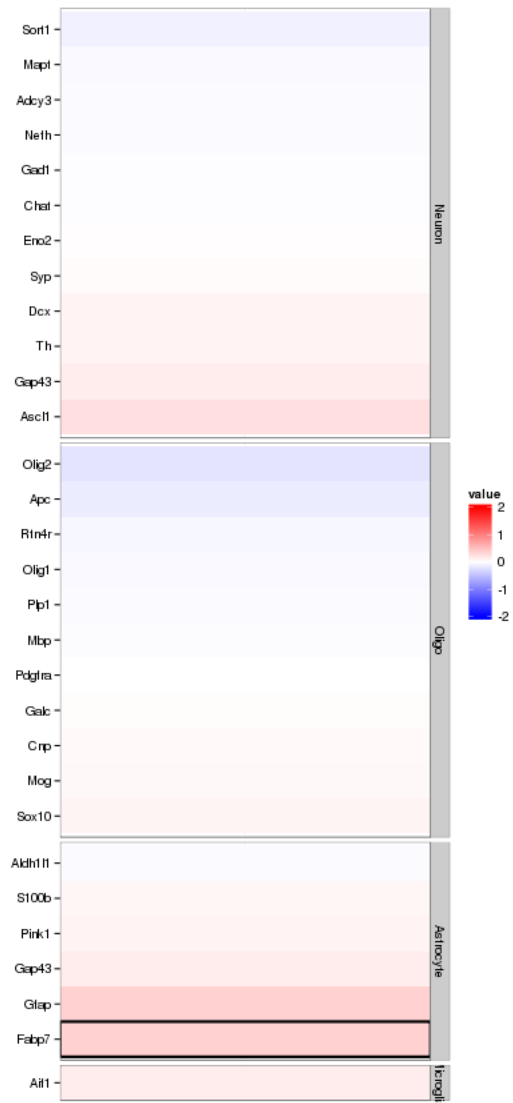

**Enrichment or Depletion of neural differentiation markers**

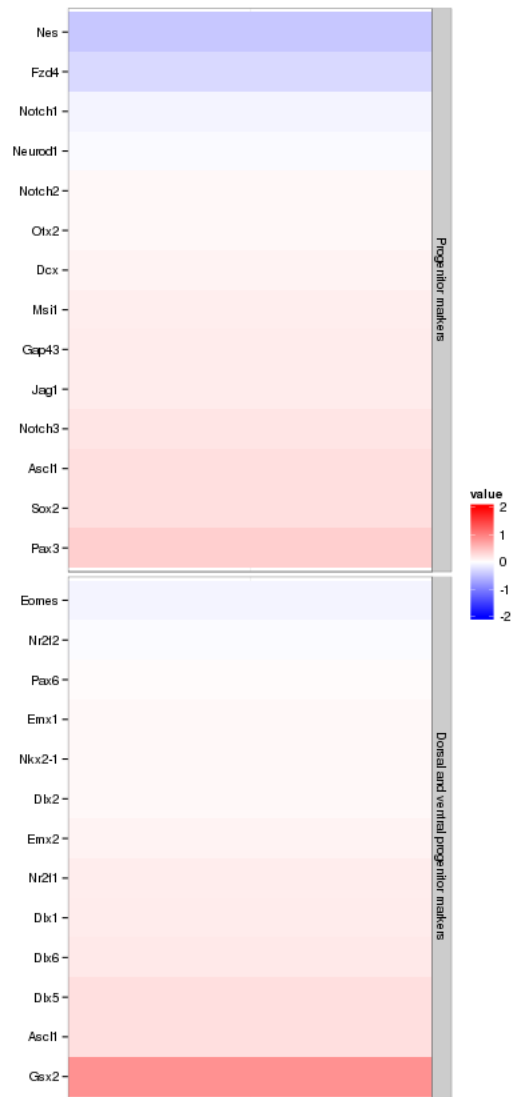

## Cis vs Trans (locally)

$\log_2$  Foldchange and test statistic are calculated with the ratio of  $\text{fpm(KO)}/\text{fpm(WT)}$ , thus the test\_stat is positive if a gene is higher in the KO and negative if a gene has lower expression in the KO

The pvalue for 0 genes significantly regulated in a region this size is: 1



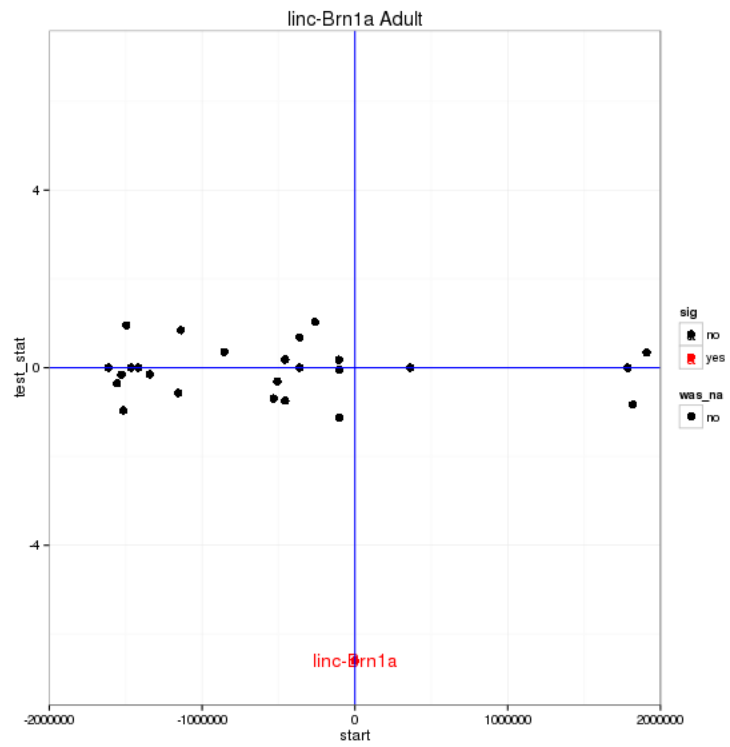

## Notes

Samples used are:

10

- 1 JR729
- 2 JR728
- 3 JR796
- 4 JR797
- 5 JR740
- 6 JR800
- 7 JR827
- 8 JR778
- 9 JR734
- 10 JR802
- 11 JR803
- 12 JR735
- 13 JR785
- 14 JR781

15 JR730

16 JR837

## Replicates

| file                                                                          | sample_name | replicate | rep_name     | total_mass  | norm_mass   | internal_scale | external_scale |
|-------------------------------------------------------------------------------|-------------|-----------|--------------|-------------|-------------|----------------|----------------|
| 1 /n/rinn_data1/seq/fgoff/Projects/BrainMap/data/quants/JR729/abundances.cxb  | WT          | 0         | WT_0         | 26334400.00 | 33756400.00 | 0.78           | 1.00           |
| 2 /n/rinn_data1/seq/fgoff/Projects/BrainMap/data/quants/JR728/abundances.cxb  | WT          | 1         | WT_1         | 20329200.00 | 33756400.00 | 0.60           | 1.00           |
| 3 /n/rinn_data1/seq/fgoff/Projects/BrainMap/data/quants/JR796/abundances.cxb  | WT          | 2         | WT_2         | 34089000.00 | 33756400.00 | 1.00           | 1.00           |
| 4 /n/rinn_data1/seq/fgoff/Projects/BrainMap/data/quants/JR797/abundances.cxb  | WT          | 3         | WT_3         | 28103300.00 | 33756400.00 | 0.82           | 1.00           |
| 5 /n/rinn_data1/seq/fgoff/Projects/BrainMap/data/quants/JR740/abundances.cxb  | WT          | 4         | WT_4         | 35808200.00 | 33756400.00 | 1.06           | 1.00           |
| 6 /n/rinn_data1/seq/fgoff/Projects/BrainMap/data/quants/JR800/abundances.cxb  | WT          | 5         | WT_5         | 37012200.00 | 33756400.00 | 1.10           | 1.00           |
| 7 /n/rinn_data1/seq/fgoff/Projects/BrainMap/data/quants/JR827/abundances.cxb  | WT          | 6         | WT_6         | 27786600.00 | 33756400.00 | 0.83           | 1.00           |
| 8 /n/rinn_data1/seq/fgoff/Projects/BrainMap/data/quants/JR778/abundances.cxb  | WT          | 7         | WT_7         | 39541900.00 | 33756400.00 | 1.18           | 1.00           |
| 9 /n/rinn_data1/seq/fgoff/Projects/BrainMap/data/quants/JR734/abundances.cxb  | WT          | 8         | WT_8         | 34480600.00 | 33756400.00 | 1.04           | 1.00           |
| 10 /n/rinn_data1/seq/fgoff/Projects/BrainMap/data/quants/JR802/abundances.cxb | WT          | 9         | WT_9         | 45467400.00 | 33756400.00 | 1.33           | 1.00           |
| 11 /n/rinn_data1/seq/fgoff/Projects/BrainMap/data/quants/JR803/abundances.cxb | WT          | 10        | WT_10        | 52130400.00 | 33756400.00 | 1.54           | 1.00           |
| 12 /n/rinn_data1/seq/fgoff/Projects/BrainMap/data/quants/JR735/abundances.cxb | WT          | 11        | WT_11        | 34994400.00 | 33756400.00 | 1.04           | 1.00           |
| 13 /n/rinn_data1/seq/fgoff/Projects/BrainMap/data/quants/JR785/abundances.cxb | WT          | 12        | WT_12        | 34173600.00 | 33756400.00 | 1.00           | 1.00           |
| 14 /n/rinn_data1/seq/fgoff/Projects/BrainMap/data/quants/JR781/abundances.cxb | WT          | 13        | WT_13        | 41538900.00 | 33756400.00 | 1.24           | 1.00           |
| 15 /n/rinn_data1/seq/fgoff/Projects/BrainMap/data/quants/JR730/abundances.cxb | linc_Brn1a  | 0         | linc_Brn1a_0 | 24947000.00 | 33756400.00 | 0.74           | 1.00           |
| 16 /n/rinn_data1/seq/fgoff/Projects/BrainMap/data/quants/JR837/abundances.cxb | linc_Brn1a  | 1         | linc_Brn1a_1 | 38529800.00 | 33756400.00 | 1.16           | 1.00           |

## Session Info

```
## R version 3.0.2 (2013-09-25)
## Platform: x86_64-unknown-linux-gnu (64-bit)
##
## locale:
## [1] LC_CTYPE=en_US.UTF-8      LC_NUMERIC=C
## [3] LC_TIME=en_US.UTF-8      LC_COLLATE=en_US.UTF-8
## [5] LC_MONETARY=en_US.UTF-8  LC_MESSAGES=en_US.UTF-8
## [7] LC_PAPER=en_US.UTF-8     LC_NAME=C
## [9] LC_ADDRESS=C             LC_TELEPHONE=C
## [11] LC_MEASUREMENT=en_US.UTF-8 LC_IDENTIFICATION=C
##
## attached base packages:
## [1] grid      parallel  methods  stats    graphics  grDevices  utils
## [8] datasets  base
##
## other attached packages:
## [1] plyr_1.8.1
## [2] stringr_0.6.2
## [3] seqbias_1.10.0
## [4] BSgenome.Mmusculus.UCSC.mm10_1.3.19
## [5] BSgenome_1.30.0
## [6] Biostings_2.30.1
```

```

## [7] gdata_2.13.3
## [8] GO.db_2.10.1
## [9] org.Mm.eg.db_2.10.1
## [10] clusterProfiler_1.13.1
## [11] DOSE_2.0.0
## [12] ReactomePA_1.6.1
## [13] AnnotationDbi_1.24.0
## [14] Biobase_2.22.0
## [15] mgcv_1.7-29
## [16] nlme_3.1-117
## [17] RMySQL_0.9-3
## [18] RColorBrewer_1.0-5
## [19] gridExtra_0.9.1
## [20] gtable_0.1.2
## [21] marray_1.40.0
## [22] gplots_2.13.0
## [23] GSA_1.03
## [24] limma_3.18.13
## [25] xtable_1.7-3
## [26] cummeRbund_2.7.2
## [27] Gviz_1.6.0
## [28] rtracklayer_1.22.7
## [29] GenomicRanges_1.14.4
## [30] XVector_0.2.0
## [31] IRanges_1.20.7
## [32] fastcluster_1.1.13
## [33] reshape2_1.4
## [34] ggplot2_1.0.0
## [35] RSQLite_0.11.4
## [36] DBI_0.2-7
## [37] BiocGenerics_0.8.0
## [38] knitr_1.6
##
## loaded via a namespace (and not attached):
## [1] biomaRt_2.18.0      biovizBase_1.10.8  bitops_1.0-6
## [4] caTools_1.17       cluster_1.15.2     colorspace_1.2-4
## [7] dichromat_2.0-0    digest_0.6.4       DO.db_2.7
## [10] evaluate_0.5.5     formatR_0.10       Formula_1.1-1
## [13] GenomicFeatures_1.14.5 GOSemSim_1.20.3    graph_1.40.1
## [16] graphite_1.8.1     gtools_3.4.1       Hmisc_3.14-4
## [19] igraph_0.7.1       KEGG.db_2.10.1    KernSmooth_2.23-12
## [22] labeling_0.2       lattice_0.20-29    latticeExtra_0.6-26
## [25] MASS_7.3-33       Matrix_1.1-3       munsell_0.4.2
## [28] org.Hs.eg.db_2.10.1 proto_0.3-10       qvalue_1.36.0
## [31] Rcpp_0.11.2        RCurl_1.95-4.1     reactome.db_1.46.1
## [34] Rsamtools_1.14.3  scales_0.2.4       splines_3.0.2
## [37] stats4_3.0.2      survival_2.37-7    tcltk_3.0.2
## [40] tools_3.0.2       XML_3.98-1.1      zlibbioc_1.8.0

```

## Run Info

```
##      param
## 1    cmd_line
## 2      version
## 3  SVN_revision
## 4  boost_version
## 5      genome
##
## 1 cuffdiff -p 10 -L WT,linc-Brn1a -o /n/rinn_data1/seq/lgoff/Projects/BrainMap/data/diffs/linc-Brn1a_vs_WT_Adult /n/rinn_data1/seq/lgoff/Projects/BrainM
## 2
## 3
## 4
## 5
```

# linc-Brn1a KO vs WT (Embryonic)

This file shows the wt-v-ko comparison for linc-Brn1a.

Cuff overview:

```
## CuffSet instance with:  
## 2 samples  
## 26754 genes  
## 77524 isoforms  
## 0 TSS  
## 23066 CDS  
## 0 promoters  
## 0 splicing  
## 19954 relCDS
```

## QC

### Dispersion

Dispersion plot for genes in cuff: (Overdispersion can lead to innacurate quants)

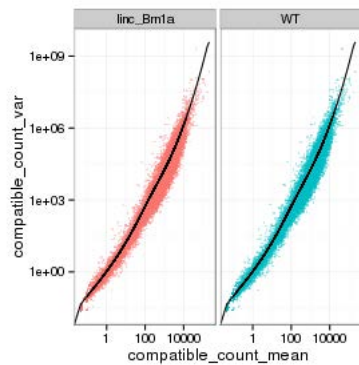

### Cross-replicate variability (fpkmSCVplot)

Differences in CV 2 can result in lower numbers of differentially expressed genes due to a higher degree of variability between replicate fpkm estimates.

Genes:

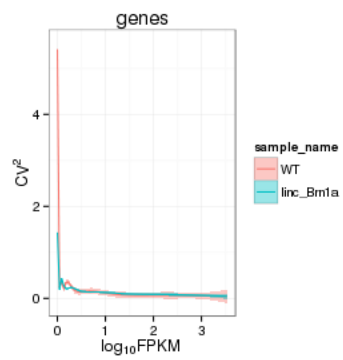

Isoforms:

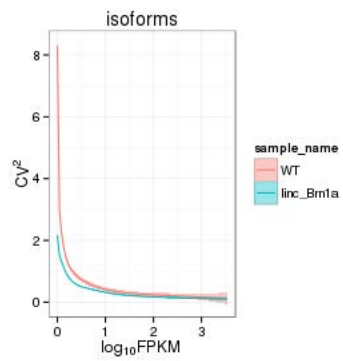

## MvA plot

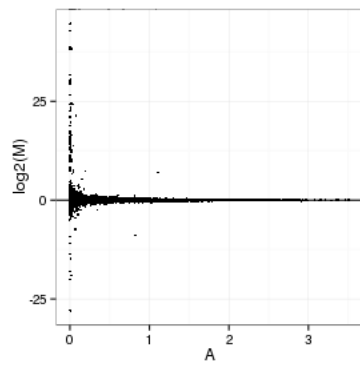

## MvA plot counts

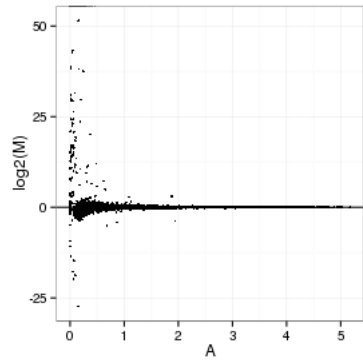

## Scatterplot matrix

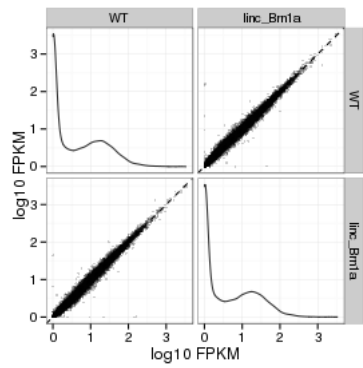

## Distributions

### Boxplots

Boxplot (genes)

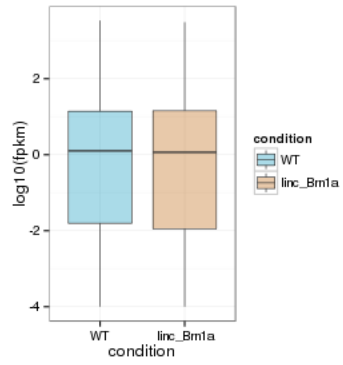

Boxplot (genes, replicates)

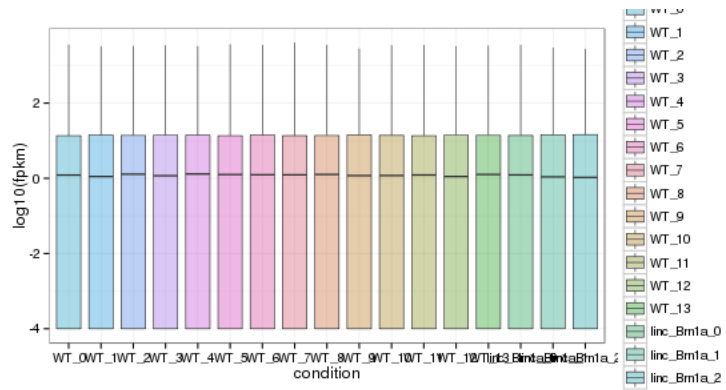

Boxplot (isoforms)

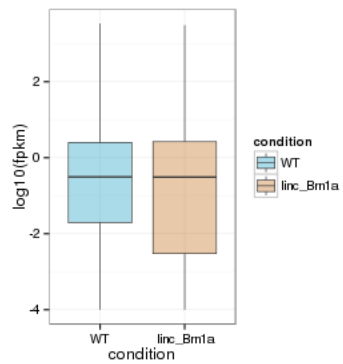

Boxplot (isoforms, replicates)



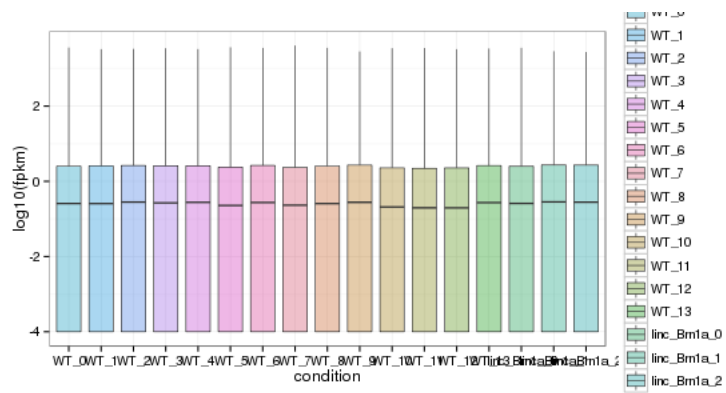

## Density

Density (genes)

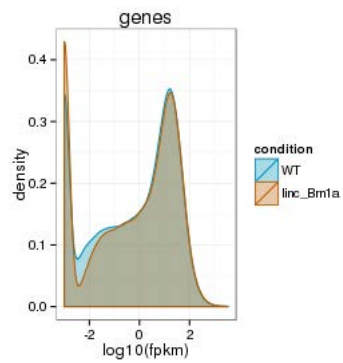

Density (genes, replicates)

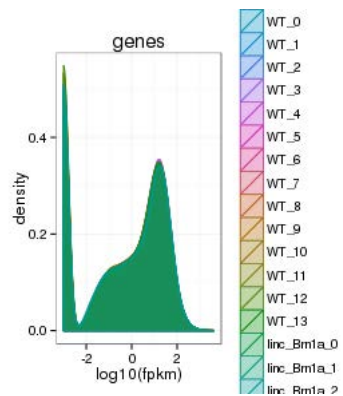

# Clustering

## Replicate Clusters

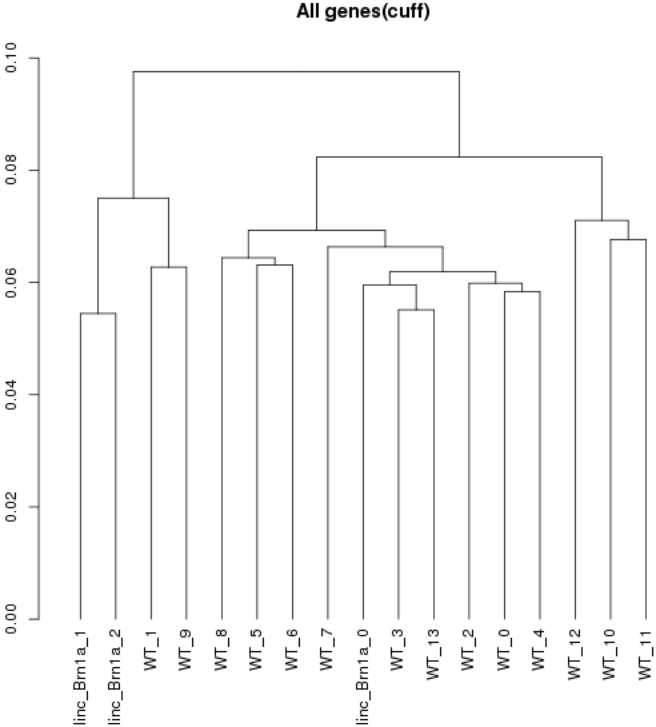

## NULL

## PCA (genes)

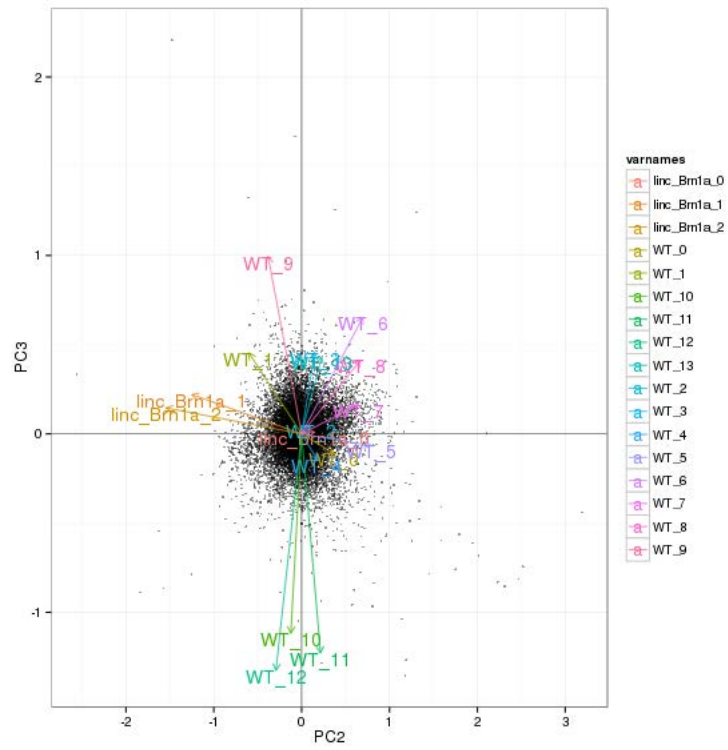

**MDS (genes)**

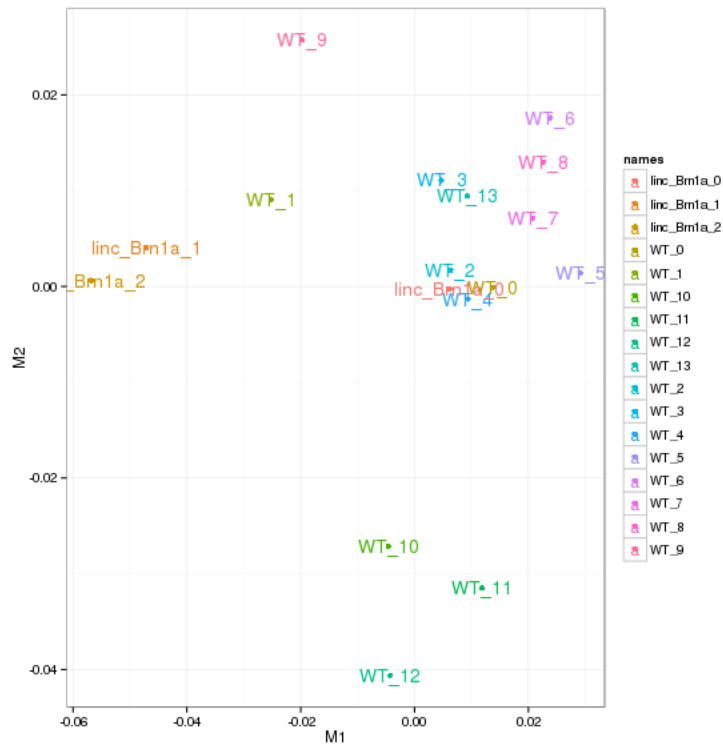

**KO assessment**  
**Endogenous lncRNA expression**

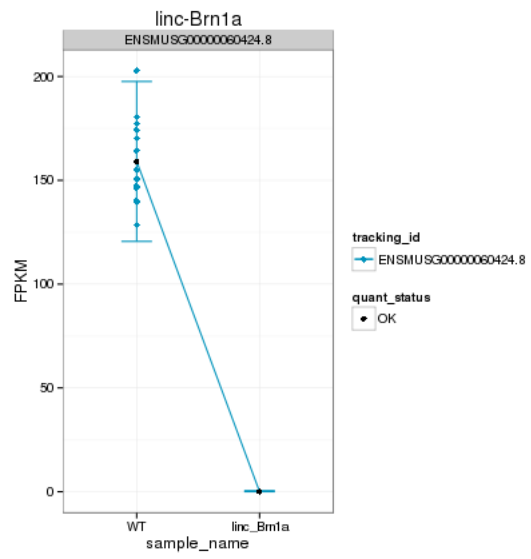

Endogenous expression of linc-Brn1a isoforms:

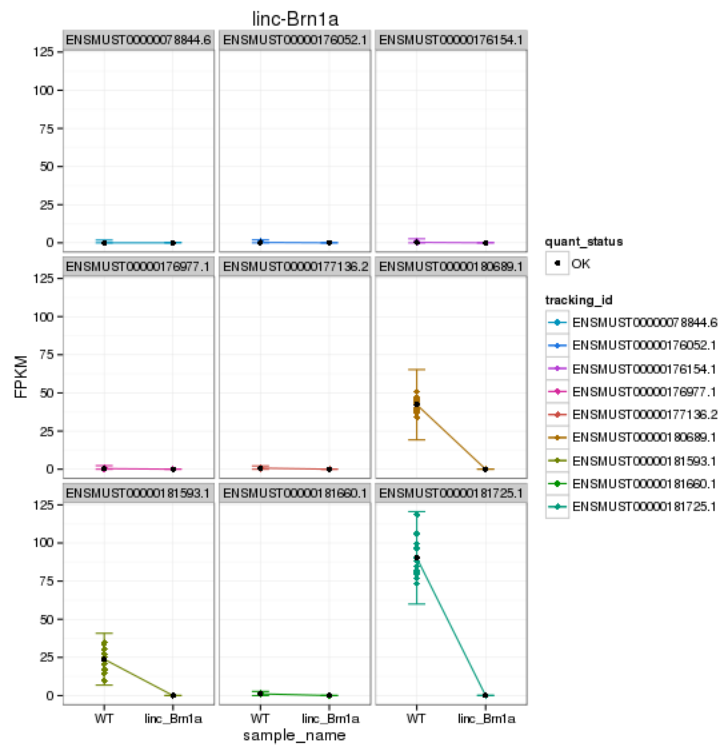

Barplot of gene expression:

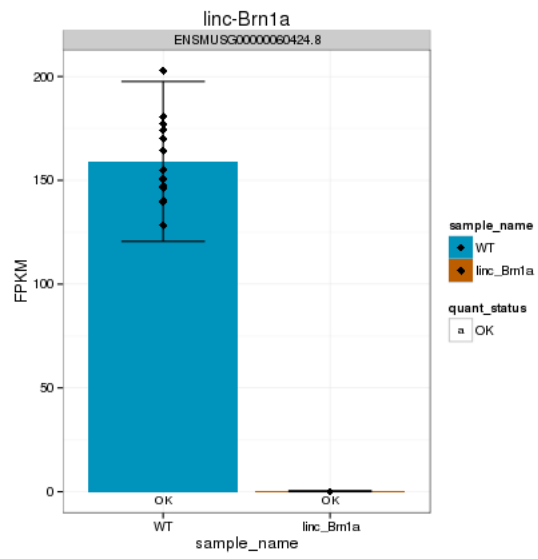

Barplot of isoform expression:

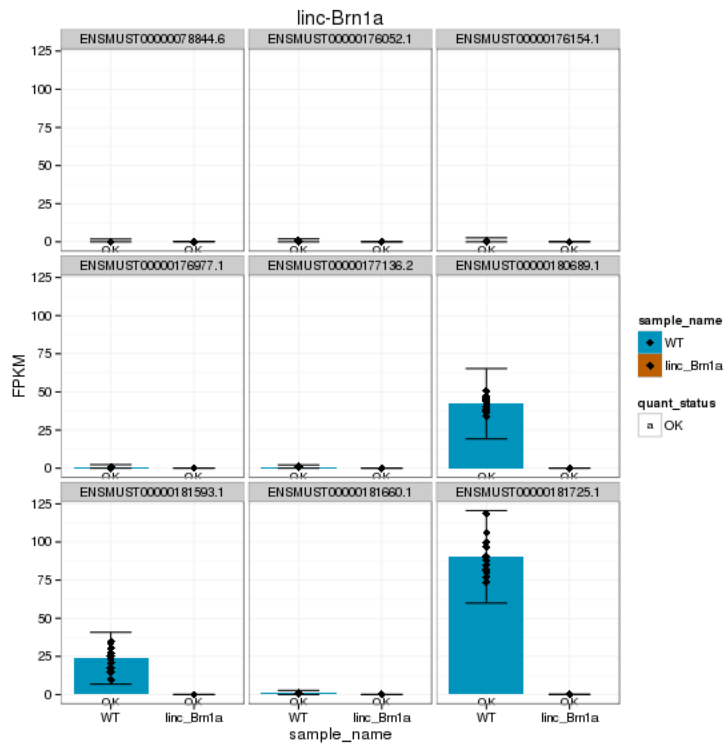

## LacZ expression

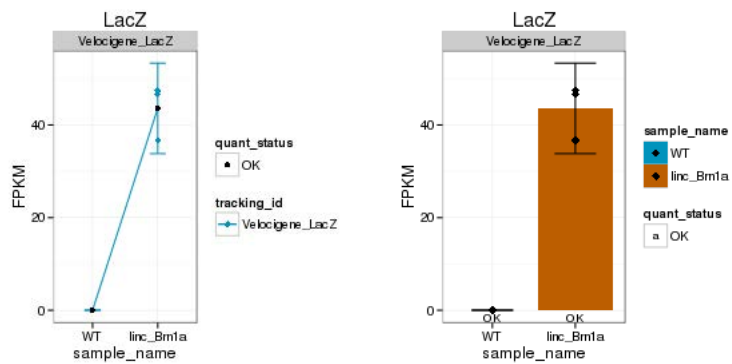

## Digital Genotyping (LacZ vs Endogenous lincRNA and Sex)

Eif2s3y is a y-expressed gene, Xist is an x-expressed gene Expression plot (endogenous linc, lacZ, Y-expressed gene):



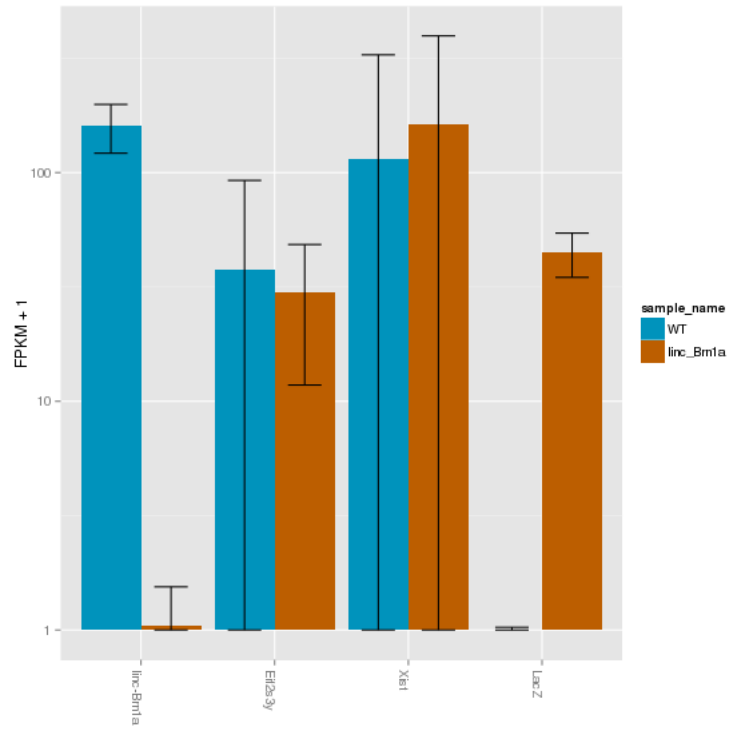

Expression heatmap:

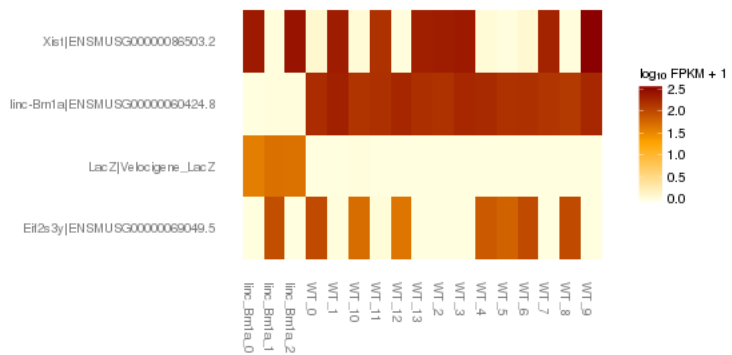

Track visualization

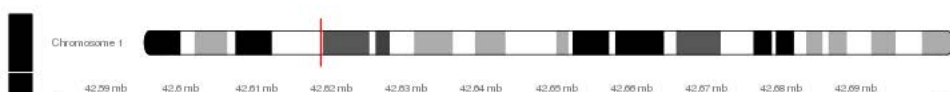



# Differential Analysis

## Differential Genes

There are 1536 significantly differentially expressed genes. They are:

```
geneAnnot$gene_short_name
1 H19
2 Nalcn
3 Lhx2
4 Cdh1
5 Ckmt1
6 Sox9
7 Sema4f
8 Hk2
9 Rpa1
10 S100a6
11 Col6a1
12 Pcnt
13 Uhrf1
14 Gabrg1
15 Ckb
16 Sp1
17 Fndc5
18 Ube2c
19 Nkx2-1
20 Col1a1
21 Foxm1
22 Smo
23 Fbxo7
24 Folr1
25 Slc1a5
26 Pnck
27 Spag5
28 Tead3
29 Dbf4
30 Rec8
31 Baz1b
32 Chaf1a
33 Mcm2
34 Kcnn1
35 Ppp1r17
36 Cd36
37 Apoe
```

38 Prkar2b  
39 Hmgn2  
40 Cdk12  
41 Slc2a3  
42 Dlgap1  
43 Plag1  
  
44 Fcgrt  
45 Dll3  
46 Phyh1p  
47 Ddr1  
48 Calb2  
49 Snmp200  
50 Man1a  
51 Hlf  
52 Grm3  
53 Brinp2  
54 Ptrf  
55 Dnmt1  
56 Cacna1e  
57 Kifc2  
58 Pax2  
59 Eno2  
60 Utp20  
61 9330159F19Rik  
62 Sst  
63 Ndrp2  
64 Aqp1  
65 Anid3b  
66 Emr1  
67 Chmp2b  
68 Pax3  
69 Lbr  
70 Crabp2  
  
71 Nes  
72 Bcan  
73 Slc25a18  
74 Matk  
75 Syt5  
76 Prkacb  
77 Chd5  
78 Wisp1  
79 Ndrp1  
80 Polr2a

81 Spc25  
82 Slc1a6  
83 Slc1a3  
84 Nid1  
85 Mcm5  
86 Asf1b  
87 Mef2c  
88 Pan2  
89 Ampd3  
90 Pvalb  
91 Slc30a4  
92 Reep5  
93 Otx1  
94 Fam131c  
95 Vax1  
96 Cdc20  
97 Neurl1a  
98 Epha2  
  
99 Slc4a1  
100 Nphs1  
101 Pola1  
102 Gmnn  
103 Cdk4  
104 B4galnt1  
105 Tph2  
106 Klk4  
107 Syng3  
108 Pole  
109 Pcdha2  
110 Tinf2  
111 Tgfbr1  
112 Khgrp  
113 Rplp1  
114 Fhl2  
115 Rbfox1  
116 Ewsr1  
117 Bcl2l13  
118 Fam163b  
119 Slc16a12  
120 Syn2  
121 Nuak2  
122 Slc38a3  
123 Pifo

124 Raver1  
125 Eya4  
126 Myt1  
127 Lmbr1  
128 Odc1  
129 Sptbn4  
130 Gltf  
131 Kif11  
132 Phox2b  
133 Enkd1  
134 Igf2bp1  
135 Aldh1a2  
136 Cad  
137 Dll1  
138 Ptgds  
139 Slc25a13  
140 Ube2i  
141 Nolc1  
142 Abca1  
143 Cd83  
144 Hivep2  
145 Anp32e  
146 Eps8  
147 Tnr  
148 Rxrg  
149 Ncapp  
150 Stk32c  
151 Celsr1  
  
152 Slc25a5  
153 Eef1a2  
  
154 Mapkapk2  
155 Phf21b  
156 Matn4  
157 Il13ra1  
158 Rnd3  
159 Brca1  
160 Vtn  
161 Traf4  
162 Aldoc  
163 Timp2  
164 Rarb  
165 Cdc6  
166 Atad5

167 Zfp334  
168 Rhbdl3  
169 Birc5  
170 Wfdc2  
171 Mmp9  
172 Slc12a7  
173 Mybl2  
174 Rac3  
175 Erbb3  
176 Mfng  
177 Pmp22  
178 Anxa6  
179 Kpna2  
180 Mapt  
181 Gira2  
182 Sparc  
183 Crrh1  
184 Ikzf1  
185 Cbx1  
186 Lhx1  
187 Sfrp5  
188 Sult4a1  
189 E2f2  
190 Cacng2  
191 Scn1b  
192 Lhx9  
193 Syne1  
194 Fbxo5  
195 Nr2e1  
196 Plagl1  
197 Grm1  
198 Perp  
199 Smpdl3a  
200 Fabp7  
201 Nts  
202 Slc6a15  
203 Sim1  
204 Dcn  
205 Cdk1  
206 Actr6  
207 Tmpo  
208 Kitl  
209 Ahi1

210 Nedd1  
211 Mtrf2  
212 Stx7  
213 Moxd1  
214 Usp44  
215 Ascl1  
216 Ptpr  
217 Mum1  
218 Meis1  
219 Tcf3  
220 Cobl  
221 Grb10  
222 E2f7  
223 Mdm1  
224 Col6a2  
225 Glyctk  
226 Hmnr  
227 Hcn2  
228 Slc22a4  
229 Rasgef1c  
230 Sar1b  
231 Nefh  
232 Btg2  
233 Igfbp3  
234 Adcy1  
235 Aebp1  
236 Prr11  
237 Gria1  
238 Shmt1  
239 Ligl1  
240 Pctp  
241 Fam49a  
242 Fam84a  
243 Id2  
244 Rrm2  
245 Ace  
246 Rasl10b  
247 Asic2  
248 Slc9a3r1  
249 Fam64a  
250 Cygb  
251 Pld2  
252 Slc6a4



253 Doc2b  
254 Prpf8  
255 Aurkb  
256 Pfas  
257 Top2a  
258 Higd1b  
259 Pole2  
  
260 Ptpn21  
261 Ngb  
262 Sptb  
263 Zfp3611  
  
264 Efcab11  
265 Ccdc88c  
266 Fbln5  
267 Lgmn  
268 Tshz3  
269 Rgs6  
270 Ppp1r13b  
271 Kif26a  
272 Gng4  
273 Ryr2  
274 Amph  
275 Gli3  
276 Dek  
277 Ogn  
278 Gadd45g  
279 Ror2  
280 Habp4  
281 Drd1a  
282 Adcy2  
283 Golm1  
284 Trip13  
285 Cep72  
286 Slc6a3  
287 Ocln  
288 Arhgef28  
289 Iqgap2  
290 Elovl7  
291 Depdc1b  
292 Rasgrf2  
293 Nln  
294 Rgs7bp  
295 Htr1a

296 Hcn1  
297 Cdhr1  
298 Dnajc9  
299 Otx2  
300 Slc35f4  
301 Rnase4  
302 Sh3bp5  
303 Arhgef3  
304 Gdf10  
305 Xpo4  
306 Ska3  
307 Ints9  
308 Cacna2d3  
309 Wnt5a  
310 Diap3  
311 Pbk  
312 Esco2  
313 Clu  
  
314 Ephx2  
315 Stmn4  
316 Ebf2  
317 Bora  
318 Kihl1  
  
319 Fgf17  
320 Osmr  
321 Haus4  
322 Ajuba  
323 Psmb5  
324 Efs  
325 Cpne6  
326 Sema5a  
327 Cmb1  
328 Rai14  
329 Baalc  
330 Csmc3  
331 Cdh10  
332 Shcbp1  
333 Matn2  
334 Kcnc1  
335 Atad2  
336 Sla  
337 Adcy8  
338 Gtse1

339 Syng1  
340 Dsc1  
341 Enpp2  
342 Col2a1  
343 Shisa9  
344 Emp2  
345 Cldn1  
346 Fgf12  
347 Hrasl  
348 Apod  
349 Ly6h  
350 Lynx1  
351 Mapk12  
352 Cd200  
353 Prkdc  
354 Mcm4  
355 Nde1  
356 Mpv17l  
357 Boc  
358 Sidt1  
359 Slc7a4  
360 Ncam2  
361 Itgb5  
362 Ccdc14  
363 Adcy5  
364 Grik1  
365 Chaf1b  
366 Clic6  
367 Gart  
368 Tmem50b  
369 Ifngr2  
370 Faim2  
371 Racgap1  
372 Krt18  
373 Sncg  
374 Rtn  
375 Serinc2  
376 Kcnk5  
377 Dlx2  
378 Prph  
379 Cdca3  
380 Tiam2  
381 Thbs2

382 Smoc2  
383 Pla2g7  
384 Slc5a7  
385 Enpp5  
386 Pim1  
387 Ndc80  
388 Crim1  
389 Cyp1b1  
390 Lhcgr  
391 Hn1l  
392 Syt4  
393 Kifc5b  
394 Aqp4  
395 Lama3  
396 Ndfip1  
397 Mal2  
398 Hbegf  
399 Ppp2r2b  
400 Rab27b  
401 Gnal  
402 Lox  
403 Cep192  
404 Slc14a2  
405 Lmnb1  
406 Megf10  
407 Slc22a6  
408 Anxa1  
409 Incenp  
410 Fads3  
411 Fen1  
412 Tmem2  
413 Stambpl1  
414 Cdca5  
415 Kif20b  
416 Htr7  
417 Glc  
418 Pola2  
419 Eif1ad  
420 Apba1  
421 Slc1a1  
422 Rcor2  
423 Cep55  
424 Rbp4

425 Hells  
426 Aldh18a1  
427 Lcor  
428 Maa  
  
429 Pdc11  
430 Nhrc2  
431 Afap1l2  
432 Ablm1  
433 Hspa12a  
434 Bhlhe22  
435 Arhgap19  
436 Lbx1  
437 Kcnp2  
438 Limd1  
439 Itga7  
440 Cdk2  
441 Cdh9  
442 Aatk  
443 Agap2  
444 Caly  
445 Ifitm3  
446 Lrdd  
447 Dock9  
448 Tk1  
449 Cbx2  
450 Klhl4  
451 Sdc3  
452 Tys  
453 Plk4  
454 Gdap1  
455 Itih5  
456 Clec3b  
457 Ccr1  
458 Nrp1  
459 Prkar1b  
460 Snca  
461 Gria4  
462 Paqr8  
463 Slco5a1  
464 Slc40a1  
465 Ica11  
466 Sgol2  
467 Col3a1

468 1500015O10Rik  
469 2010300C02Rik  
470 Tmeff2  
471 Sphkap  
472 Bard1  
473 2810459M11Rik  
474 Nppc  
475 Serpine2  
476 Lypd1  
477 Mcm6  
478 Cfh  
479 Epb4.1l5  
480 Dbi  
481 Cd55  
482 Tnni1  
483 Slc45a3  
  
484 Pik3c2b  
485 Ppfia4  
486 Lamc2  
487 Parp1  
488 Cnih3  
489 Rgs7  
490 Uck2  
491 Atp1b1  
492 Kifap3  
493 Cenpf  
494 Nek2  
495 Mcm10  
496 Optn  
497 Ddr2  
498 Hsd17b7  
499 Rgs5  
500 Nuf2  
501 Prdx6  
502 Mrc1  
503 Rabgap1l  
504 Nr5a1  
505 Prkcq  
506 Mastl  
507 Stxbp1  
508 Traf1  
509 Grb14  
510 Slc4a10

511 Notch1  
512 Sapcd2  
513 Grin1  
514 Hnmt  
515 Cybrd1  
516 Lrp2  
517 Slc43a1  
518 Kif18a  
519 Pax6  
520 Dut  
521 Mdk  
522 Wdr76  
523 Lrp4  
524 Lamp5  
525 Snap25  
526 Nusap1  
527 Gfra4  
528 Rad51  
529 Casc5  
  
530 Knstrn  
531 Pcn  
532 Bub1  
533 Pdyn  
534 Nkx2-2  
535 Acss1  
536 Gins1  
537 Tpx2  
538 E2f1  
  
539 Aurka  
540 Pkia  
541 Rbm38  
542 Snx16  
543 Atp9a  
544 Sall4  
545 Col9a3  
546 Map1lc3a  
547 Mmp24  
548 Dsn1  
549 Rbl1  
550 Tti1  
551 Fam83d  
552 Gnb4  
553 Ect2

554 Anxa5  
555 Ccna2  
556 Slc7a11  
557 Postn  
558 Tm4sf1  
559 Shox2  
560 Hsd3b6  
561 Hmgcs2  
562 Sypl2  
563 Slc6a17  
564 Kcnc4  
565 Neurog2  
566 Gucy1b3  
  
567 Glib  
568 Enpep  
569 Cks1b  
570 Pmf1  
571 Iqgap3  
572 Chd1l  
573 Them4  
574 Cdh17  
575 Smc2  
576 Anp32b  
577 Nr4a3  
578 Brinp1  
579 Tnc  
580 Pappa  
581 Bspry  
582 Mpdz  
583 Tal2  
  
584 Kif24  
585 Cntfr  
586 Sh3gl2  
587 Prkaa2  
588 Pde4b  
589 Dnajc6  
590 Jak1  
591 Usp1  
592 Dmrtb1  
593 Col9a2  
  
594 Tfp2c  
595 Slc2a1  
596 Ephb2



597 Kif2c  
598 Plk3  
599 Nasp  
600 Rad54l  
601 Stil  
602 Pax7  
603 HpcA  
604 Rspo1  
605 Cdca8  
606 Rpa2  
607 Rcc1  
608 Epb4.1  
609 Abcf2  
610 Prom1  
611 Kcnip4  
612 Gpr125  
613 Ablim2  
614 Ppp2r2c  
615 Stk32b  
616 Nsg1  
617 Rnf32  
618 Fosl2  
619 Cgref1  
620 Cenpa  
621 Rfc1  
622 Pds5a  
623 Gabra4  
624 Gabrb1  
625 Tec  
626 Pdgfra  
627 Tgfbr3  
628 Spp1  
629 Sparcl1  
630 Hsd17b11  
631 Nos1  
632 Dck  
633 Pf4  
634 Shroom3  
635 Cdkl2  
636 Abcb9  
637 Kntc1  
638 Rimbp2  
639 Uncx

640 Ung  
641 Lhx5  
642 Rph3a  
643 Col1a2  
644 Fam3c  
645 Eln  
646 Ezh2  
647 Fezf1  
648 Asns  
  
649 Dync1i1  
650 Akr1b8  
651 Igf2bp3  
652 Npy  
653 Ptn  
654 Slc13a4  
655 Kel  
656 Dbpht2  
657 Mad2l1  
658 Tgfa  
659 Fbxl14  
660 Cntn3  
661 Chl1  
662 Aldh1l1  
663 Cntn6  
664 Grip2  
665 Slc6a13  
666 Slc6a12  
667 Ret  
668 A2m  
669 Rasgef1a  
670 Dusp16  
671 Emp1  
672 Plbd1  
673 Mgp  
674 Slco1c1  
675 Rad18  
676 Tmtc1  
677 Slc6a11  
678 Cand2  
679 Mbd4  
680 Pianp  
681 Cd9  
682 Rad51ap1

683 Tspan11  
684 U2af2  
685 Dbx1  
686 Blm  
687 Hddc3  
688 Idh2  
689 Mfge8  
690 Ndufc2  
691 Ipo5  
  
692 Kif22  
693 Nupr1  
694 Syt3  
695 Dkk3  
696 Lyve1  
697 Tead2  
698 Plk1  
699 Rrm1  
700 Mki67  
701 Wee1  
702 Mrgprf  
703 Fgf15  
  
704 Ano1  
705 Fgf13  
706 Syp  
707 Slc38a5  
708 Msn  
709 Efnb1  
710 Magee1  
711 Itm2a  
712 2610002M06Rik  
713 Phka2  
714 Gabra3  
715 Ap1s2  
716 Zfp92  
717 Atp2b3  
718 Tceal6  
719 Rnf128  
720 Gas6  
721 Chma6  
722 Gpm6a  
723 Tmem66  
724 Plat  
725 Sfrp1

726 Scrg1  
727 Sall1  
728 Itfg1  
729 Irx3  
730 Irx5  
731 Il34  
732 Cenpn  
733 Mt3  
734 Cntnap4  
735 Gpr56  
736 Rab3a  
737 Cdh13  
738 BC021891  
739 Bean1  
740 Hsd11b2  
741 Jam3  
742 Pdgfd  
743 Thy1  
744 Kirrel3  
745 Cryab  
  
746 Mpzl2  
747 Robo3  
748 Olfm2  
749 Ldlr  
750 Ccnb2  
751 Anxa2  
752 Kif23  
753 Pkm  
754 1700017B05Rik  
755 Nptn  
756 Mlip  
757 Car12  
758 Igdcc3  
  
759 Tipin  
760 Zwlch  
761 Tfdp2  
762 Clstn2  
763 Cdc25a  
764 Cspg5  
765 DclK3  
766 Scn5a  
767 Slco2a1  
768 Topbp1

769 Thsd7a  
770 Colgalt2  
771 Ablim3  
772 Inpp1  
773 Chrm1  
774 Troap  
775 Pdxk  
776 Ccdc85a  
777 Rims3  
778 Itgbl1  
779 Camkv  
780 Nup93  
781 Rasgrp2  
782 Sox10  
783 Cdo1  
784 C330027C09Rik  
785 Cntnap3  
786 Gas7  
787 Mgl1  
788 S100b  
789 Ttf2  
790 Wnt6  
791 Ttll4  
792 Galnt9  
793 4833424O15Rik  
794 Snap91  
795 Adamts15  
796 Prss35  
797 Cdc14a  
798 Bai3  
799 Ndn  
  
800 Rfwd3  
801 Cplx1  
802 Gabrb3  
803 Adra2a  
804 Emx1  
805 Fndc3c1  
806 Recql4  
807 D930015E06Rik  
808 Map9  
809 Gucy1a3  
810 Zswim5  
811 Aspm

812 9430020K01Rik

813 Gria2

814 Kcnk1

815 Fancd2

816 Rpap1

817 Fstl5

818 Polq

819 Rhov

820 Slc25a37

821 Tmem132d

822 Kif4

823 Cbl

824 Smc4

825 Ramp1

826 Barhl2

827 Gbx2

828 Slc41a2

829 Pbx2

830 Tdg

831 Fras1

832 Mfrp

833 Pcdh11x

834 BC030867

835 Nrip3

836 Larp6

837 Plvap

838 Sncb

839 Ncaph

840 Htr2a

841 Dpp4

842 Ncapd3

843 Brinp3

844 Lars2

845 Rims4

846 Arx

847 Mid1

848 Lzts2

849 Tmem98

850 Fign1

851 Pcdh17

852 Lrln5

853 Zswim4

854 Melk

855 Mic1  
856 Ddx11  
857 Ids  
858 Syt1  
859 Tmem59l  
860 Colec12  
861 Prickle1  
862 Sostdc1  
863 Ska1  
864 Lrm3  
865 Cep135  
866 Npy1r  
867 March1  
868 Greb1  
  
869 Fxyd1  
870 Fxyd7  
871 Aaas  
872 Zcchc12  
873 Tubb4b  
874 Dner  
875 Kif15  
876 Anln  
877 Dpp10  
878 Plch1  
879 Wnt4  
880 Dna2  
881 C1qa  
882 C1qc  
883 Neto2  
884 Fzd8  
885 Slc39a12  
886 Wnt8b  
887 Spryd3  
888 Hk1  
889 Sstr4  
890 1110059M19Rik  
891 Mgarp  
892 Ppp1r14a  
893 Pacrg  
894 Islr  
895 Clic4  
896 Itih2  
897 Tacc3

898 Slc9a7  
899 Paqr7  
900 Nov  
901 Endod1  
902 Vgf  
903 4930427A07Rik  
904 Dtl  
905 Dlgap5  
906 Wdhd1  
907 Cldn11  
908 Ckap2  
909 Phyhipl  
910 Ppp1r16b  
911 Slc16a9  
912 Ctnna1  
913 Neurod6  
914 Rmi2  
915 Dhx38  
916 Igsf9  
917 Cramp1l  
918 Haus6  
919 2410066E13Rik  
920 Kcna6  
921 AW551984  
922 Cdon  
923 Camk4  
  
924 Notch3  
925 Cep250  
926 Ncapd2  
927 Glra3  
928 Fau  
929 Satb2  
930 Ttk  
931 Sv2a  
932 Rgs4  
933 Akap12  
934 Pold1  
935 Hoxb4  
936 Trhr  
937 Ephx1  
938 Prc1  
939 Tspyl5  
940 Bmp6



941 Cpq  
942 Myo16  
943 Anpep  
944 En2  
945 Htr5a  
946 F13a1  
947 Gpr126  
948 Prune2  
949 Camk1d  
950 Akna  
951 Tekt5  
952 Rbpj  
953 Suv39h1  
954 AF529169  
955 Rnf122  
956 March4  
957 Neil3  
958 Tspy14  
959 Cntn5  
960 Mmd2  
961 Grin3a  
962 Tmem246  
963 Strip2  
964 Kcne2  
965 Ncoa7  
966 Ldb2  
967 Raly1  
968 Slc6a5  
969 Exo1  
970 Cpeb2  
971 Gabbr2  
972 Xkr5  
973 Arhgap29  
974 Fam60a  
975 Timeless  
976 Baz2a  
977 Bub1b  
978 Gpr176  
  
979 Abcc8  
980 Kcns1  
981 2810417H13Rik  
982 Sema3d  
983 Dnm3

984 Hey1  
985 Cacng5  
986 Cdh18  
987 Cdh12  
988 Prdm13  
989 Necab1  
990 Pitpnm3  
991 C3ar1  
992 Abcb1a  
993 Ildr2  
994 Erc2  
995 Ppp1r14c  
996 Rad54l2  
997 St8sia4  
998 Il17rd  
999 Hnmpul1  
1000 Six5  
1001 Reps2  
1002 Atp1a3  
1003 Tet2  
1004 Rcc2  
1005 Slc22a2  
1006 Npnt  
1007 Nrg3  
1008 Fam117b  
1009 Pif1  
1010 Grid1  
1011 Nbl1  
1012 H2afv  
1013 Dnah7b  
1014 Brca2  
1015 Arhgap11a  
1016 Chd7  
1017 Rbbp8  
1018 Car8  
1019 Nkx6-2  
1020 Inhba  
1021 Atp1b2  
1022 Wrap53  
1023 Rap1gap  
1024 4930506M07Rik  
1025 Cldn5  
1026 Dicer1

1027 Pik3r1  
1028 Ccnb1  
1029 Gpr12  
1030 Kif14  
1031 Ago1  
1032 Fmod  
1033 Nlrp5-ps  
  
1034 Cdc42ep4  
1035 Rims1  
1036 Kcnj2  
1037 Mpped1  
1038 Trpc5  
1039 Kirrel  
1040 Plekha6  
1041 Myrip  
1042 Abca9  
1043 Ptpre  
1044 Mcm3  
1045 Ipo9  
1046 S100a10  
1047 Spidr  
1048 Elmod1  
1049 Foxn4  
1050 Ncapg2  
1051 Tbca  
1052 Bend6  
1053 Slc35f2  
1054 Specc1  
1055 Grap2  
1056 Dmrt3  
1057 Adora1  
1058 Clspn  
1059 Kcnj12  
1060 Golga7b  
1061 Jhdm1d  
1062 Mrap2  
1063 Hebp1  
1064 Smg7  
1065 Muc1  
1066 Egflam  
1067 Onecut1  
1068 Smco3  
1069 B3galnt1

1070 Kcnj6  
1071 Tmem130  
1072 E130012A19Rik  
1073 Eifn2  
1074 Acpl2  
1075 Adamts3  
1076 Diras1  
1077 Dmrt1  
1078 1700048O20Rik  
1079 Cim1  
1080 Fam19a2  
1081 Cdc25c  
1082 Snhg11  
1083 Shisa2  
1084 Fam46c  
1085 Rps2  
1086 Cnrip1  
1087 D3Bwg0562e  
1088 Fzd1  
  
1089 Cnpy1  
1090 Ccnjl  
1091 Kcnj10  
1092 Fads6  
1093 Syt16  
1094 Napepld  
1095 Ankrd34b  
1096 Prkce  
1097 Pcdhb7  
1098 Lingo2  
1099 Sox3  
1100 Shroom2  
1101 Lrrc3b  
1102 Cenph  
1103 Lhfpl2  
1104 Cenpe  
1105 Gprin3  
1106 Bhlhe23  
1107 Penk  
1108 Frrs1l  
1109 Olig3  
1110 Dbx2  
1111 Chrm2  
1112 Zfp629

1113 Vwc2l  
1114 Plekha7  
1115 Cdc42ep2  
1116 Mms22l  
1117 C2cd4c  
1118 Sdpr  
1119 Onecut2  
1120 Hpcal4  
1121 Chrm3  
1122 Olig1  
1123 Nxph1  
  
1124 E2f8  
1125 Gsg1l  
1126 Iqub  
1127 Hepacam  
1128 Ankle1  
1129 Hs3st2  
1130 Gjb2  
1131 Camk2n1  
1132 C77370  
1133 Ticrr  
1134 Hrk  
1135 Olfm12a  
1136 Hmga1  
1137 Nxph3  
1138 Ppp1r3b  
1139 Fam211b  
1140 Vat1l  
1141 Fbl  
1142 Spsb4  
1143 Zfp41  
  
1144 Fbxo41  
1145 Dmrt2  
1146 Helt  
1147 C2cd3  
1148 Mc4r  
1149 Gap43  
1150 Mettl21c  
1151 Fam180a  
1152 Rnf152  
1153 Mis18bp1  
1154 Cltb  
1155 Fgfbp3

1156 Lix1  
1157 Cdca4  
1158 Diras2  
1159 Tshz2  
1160 Hes5  
1161 Ldlrad3  
1162 Pirt  
1163 Tmem72  
1164 Rbm15  
1165 Col6a3  
1166 Dmrt2  
1167 Nwd1  
1168 Gpr85  
1169 Slitrk3  
1170 Ckap2l  
1171 Pou4f1  
1172 Arxes1  
1173 Fgfbp1  
1174 Gli2  
1175 Nhlh2  
1176 Sp8  
1177 Igf2  
1178 Myof  
1179 Rhno1  
1180 Rpl29  
1181 Lonrf2  
1182 Vstm2a  
1183 Neurog1  
1184 Cdca2  
1185 Atp13a5  
1186 Nrsn1  
1187 Rapgef4  
1188 Oxtr  
1189 Frmd3  
1190 Frmpd4  
1191 Lrp1b  
1192 Kcnk3  
1193 Scn3b  
1194 Zfp219  
1195 Rps23  
1196 Lingo1  
1197 Grm5  
1198 Crh

1199 Armcx4  
1200 Fam26e  
1201 2610318N02Rik  
1202 H2afx  
1203 Ankrd55  
1204 Hic2  
1205 Fzd2  
1206 Neto1  
1207 Lgals3  
1208 Tcf19  
1209 Pcdh20  
1210 Adra1b  
1211 Trhde  
1212 Vstm4  
1213 Emilin3  
1214 Scg2  
1215 Sgms2  
1216 Gja1  
1217 Kcns2  
1218 Lin28a  
1219 Olfm1  
1220 P4ha3  
1221 Lingo3  
1222 Mblac2  
1223 Sv2c  
1224 Ercc6l  
1225 Gen1  
1226 Msrb3  
1227 Nhlh1  
1228 4930422G04Rik  
1229 Gfod1  
1230 Ncald  
1231 Plagl2  
1232 Kcnj16  
1233 Arhgef39  
1234 Map3k19  
1235 Mest  
1236 Sox6  
1237 Xkr4  
1238 Slc6a7  
1239 Zfp217  
1240 Sema5b  
1241 Hbb-y

1242 Hbb-bh1  
1243 Gpr17  
1244 Hbb-bs  
1245 Dlg2  
1246 Lrrtm4  
1247 Jun  
1248 Reep1  
1249 Dnah6  
1250 Prkcb  
1251 Gas1  
1252 Ube2ql1  
1253 Sv2b  
  
1254 Yap1  
1255 E330013P04Rik  
1256 Rnf26  
1257 Gsx1  
1258 Mapk11  
1259 Ptprt  
1260 Arhgap20  
1261 Aldh1a1  
1262 Al854703  
1263 Phgdh  
1264 Kdm3a  
1265 Kcnp1  
1266 Plxnb1  
1267 Exoc6  
1268 Ppfia2  
1269 Cnn3  
1270 6330403A02Rik  
1271 Tmem179  
1272 Nt5dc3  
1273 Skp2  
1274 Spock3  
1275 4922502B01Rik  
1276 Fgfr3  
1277 Msi1  
1278 Cadps  
1279 Sytl5  
1280 Vsnl1  
1281 Slc8a1  
1282 Hmgb2  
1283 6330419J24Rik  
1284 Tmem158



1285 Nyap2  
1286 Lrtm2  
1287 Cntn1  
1288 Gabra5  
1289 Ntrk2  
1290 Nell1  
1291 Maf  
1292 Alk  
1293 Epha6  
1294 Hba-x  
1295 Cdca7  
1296 Gpc3  
1297 Nap1l3  
1298 Abcd2  
1299 Car10  
1300 Col8a2  
1301 Synpr  
1302 Lig1  
1303 Adap1  
1304 Pign  
1305 Mpz  
1306 Trnp1  
1307 Fry  
1308 Grm7  
  
1309 Hmga2  
1310 Pou3f4  
1311 Jakmip3  
1312 Hist3h2ba  
1313 Magel2  
1314 Slc35f3  
1315 Cep110  
1316 4922502B01Rik  
1317 Rit2  
1318 Gnai1  
1319 Ldoc1  
1320 A830018L16Rik  
1321 Lepr  
1322 Camk2b  
1323 Palld  
1324 Gm10036  
1325 Gstm1  
1326 Tspan7  
1327 Espl1

1328 Spock2  
1329 Nrf1  
1330 Znf2  
1331 Gpc6  
1332 Anks1b  
1333 Gda  
1334 Capn11  
1335 Samd12  
1336 Tubb2a  
1337 Zfp516  
1338 Pde1a  
1339 Skap2  
  
1340 Fam19a1  
1341 Il1rap12  
1342 Hopx  
1343 Fcgr3  
1344 Trp53  
1345 Rcan3  
1346 Zfp422  
1347 Ntm  
1348 Alox5ap  
1349 Cend1  
1350 Sct2  
1351 Caln1  
1352 Rnf14  
1353 Dcc  
1354 Hist1h4i  
1355 Kcnd2  
1356 Acyp2  
1357 Csmc1  
1358 Slc4a4  
1359 Cdh3  
1360 Gm10093  
1361 Maml3  
1362 Fiz1  
1363 Acvr2b  
  
1364 Hipk2  
1365 Snrpa  
1366 Sox21  
1367 Pclo  
1368 Mdc1  
1369 Tmem91  
1370 Ppp1r1b

1371 Tac1  
1372 Ttr  
1373 Suclg2  
1374 Galnt16  
1375 Myt1l  
1376 Unc13c  
1377 Tgif2  
1378 Cks2  
1379 Opcml  
1380 Trank1  
1381 Otof  
1382 Dgkk  
1383 Nsl1  
1384 Sim2  
1385 Mtap  
1386 Kcnma1  
1387 Tmem117  
1388 Luzp2  
1389 Cyp26b1  
1390 Sema3e  
1391 Jazf1  
1392 Unc5d  
1393 Sox11  
1394 Jakmip1  
1395 Crb1  
1396 Slc22a8  
1397 Alms1  
1398 Slc24a3  
1399 Gm7964  
1400 Fbln2  
1401 Ifi27  
1402 Cntn4  
1403 Clasp1  
1404 Scn1a  
1405 Sepp1  
1406 Dhrs3  
1407 Phactr4  
1408 Knkc1  
1409 Numa1  
1410 Lefty2  
1411 Psg16  
1412 Gm10184  
1413 Cntnap5b

1414 Hes6  
1415 Xpo5  
1416 Lgi1  
1417 Foxd3  
1418 Ppp1r3c  
  
1419 Cbln4  
1420 Pcnaps2  
1421 Cenpm  
1422 Ninl  
1423 Col8a1  
1424 Gm608  
1425 Slc4a5  
1426 Cep152  
1427 Gpr88  
1428 Trp53i11  
1429 Celsr2  
1430 Psrc1  
1431 Col28a1  
1432 Ddx3y  
1433 Slc7a14  
1434 Nxph2  
1435 Prdm6  
1436 Lyz2  
1437 Nkain2  
1438 Sifn9  
1439 Hba-a2  
1440 Ccnd1  
1441 Fam217b  
1442 Tmem132b  
1443 Peg12  
1444 Cntnap5a  
1445 Gm10282  
1446 Zfp804a  
1447 Jund  
  
1448 Syndig1l  
1449 2410004P03Rik  
1450 Rpl23  
1451 Grid2  
1452 Ccnf  
1453 Fam84b  
1454 Gm7292  
1455 Sod3  
1456 Drc1

1457 Arhgdig  
1458 Cep76  
1459 Wdfy1  
1460 5730409E04Rik  
1461 4632427E13Rik  
1462 Snmp40  
1463 Spc24  
1464 Mafb  
1465 Zcchc3  
1466 Thbd  
1467 Gas2l3  
1468 Ctxn2  
1469 Pak6  
1470 Ptar1  
1471 Fibin  
1472 Heg1  
1473 Pde11a  
  
1474 Scn2a1  
1475 Selm  
1476 2700094K13Rik  
1477 Gm16485  
1478 Gm12184  
1479 Nrap  
1480 Fam43b  
1481 Al593442  
1482 Aunip  
1483 Hs3st4  
1484 Rad54b  
1485 Slc8a3  
1486 Gm14446  
1487 Kifc1  
1488 Clec2l  
1489 Pprt4  
1490 Fzd10  
1491 Nap1l2  
1492 Ccdc85c  
1493 Gm12371  
1494 Gm14342  
1495 D030055H07Rik  
1496 9130020K20Rik  
1497 Mia  
1498 Ier5l  
1499 Gm16586

1500 3110047P20Rik  
1501 Pcp4  
  
1502 Mndal  
1503 Cdr1  
1504 Gm340  
1505 Hspa1b  
1506 Tcerg1l  
1507 Smim13  
1508 D17H6S56E-5  
1509 Gm19345  
1510 Six3os1  
1511 Gm9866  
1512 Pou3f2  
1513 Fignl2  
1514 Sox1  
1515 Kcnj11  
1516 H1f0  
1517 Fam181a  
1518 Galntl6  
1519 Gm26872  
1520 Al854517  
1521 Gm3764  
1522 1700037F24Rik  
1523 A930011O12Rik  
1524 Gm17388  
1525 Miat  
1526 Gm5101  
1527 Gm26809  
1528 2810011L19Rik  
  
1529 Gm26981  
1530 Gm27032  
1531 Gm17750  
1532 Gm27031  
1533 Pclo  
1534 RP23-45G16.5  
1535 KCTD12  
1536 RP24-312B12.1

## Matrix of gene significant differences between conditions

(skip for Brainmap wt-v-ko comparisons)

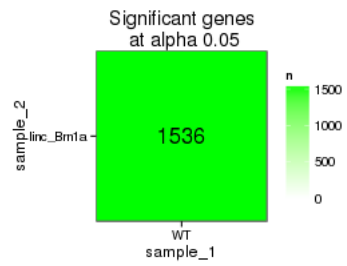

## Significant gene expression differences between conditions

Expression plot (genes):(turned off)

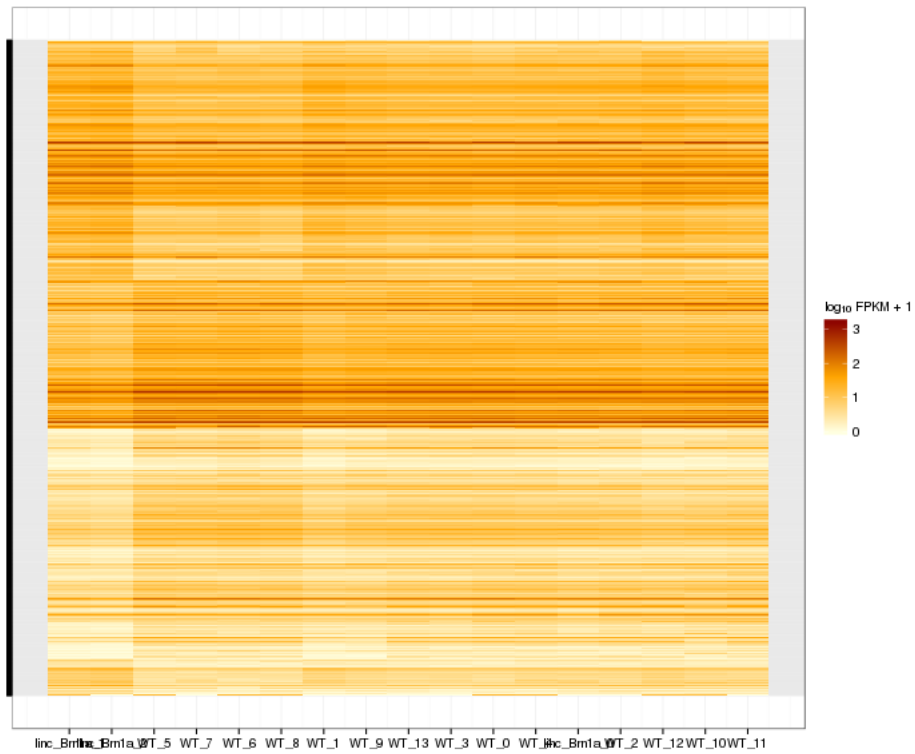

Significant genes with expression >50fpkm (any condition):(turned off)

An individual look at each of the highly expressed significantly differentially regulated genes: (eval=false for first pass)

## Expression-level/significance relationship

Scatter plot of significant genes only:

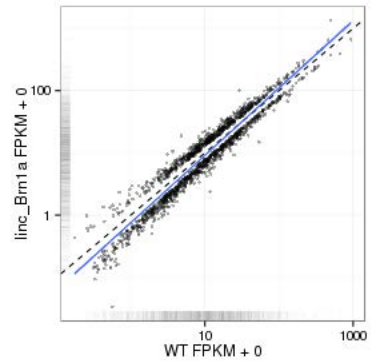

Volcano Plot

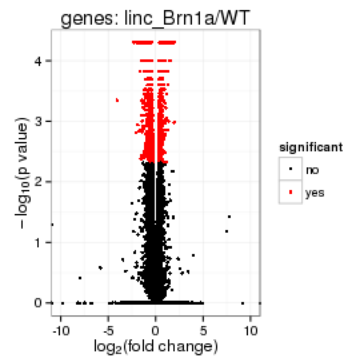

Volcano plot with significant genes only:



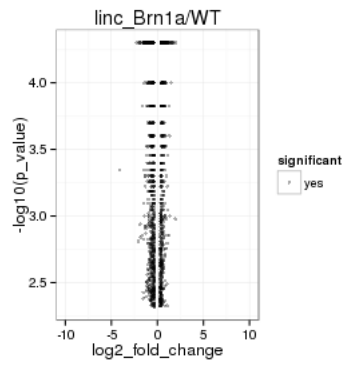

FoldChange Heatmap

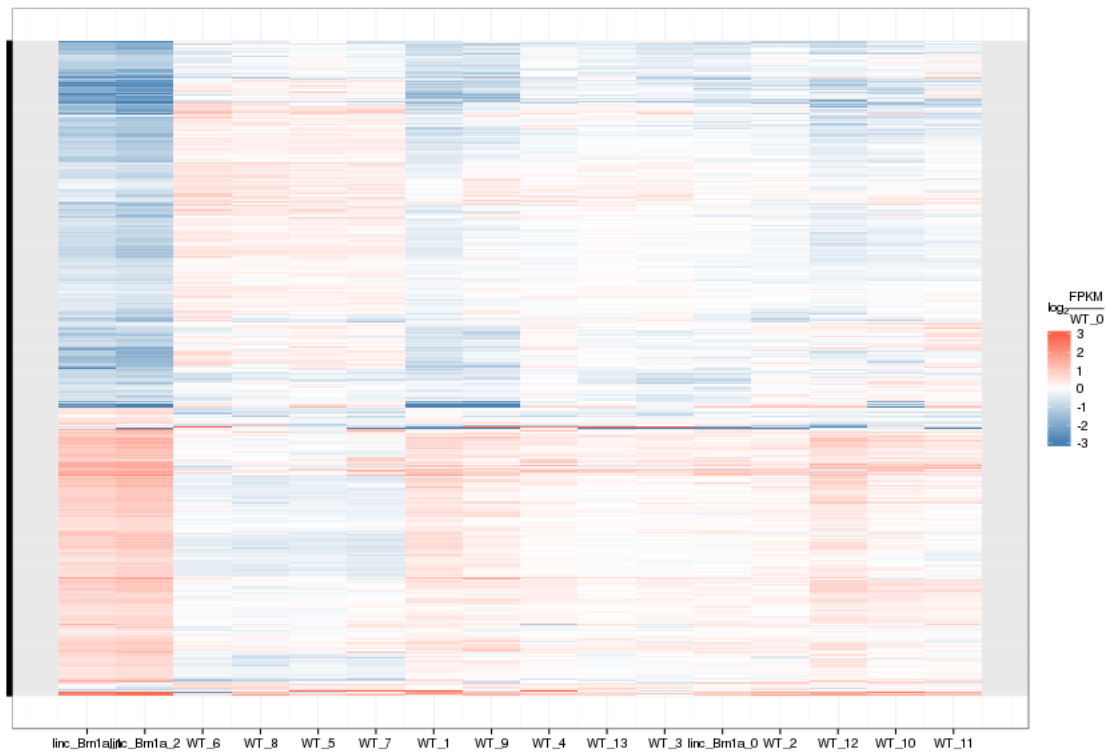

## Differential Splicing

Differential Isoforms between conditions

Per isoform difference between conditions:

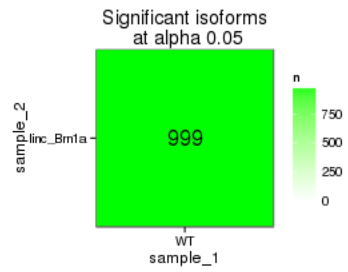

These isoforms are:

| isoAnnot | gene_short_name |
|----------|-----------------|
| 1        | H19             |
| 2        | Nalcn           |
| 3        | Lhx2            |
| 4        | Cdh1            |
| 5        | Ckmt1           |
| 6        | C1d             |
| 7        | Hk2             |
| 8        | Rpa1            |
| 9        | Snrpn           |
| 10       | S100a6          |
| 11       | Col6a1          |
| 12       | Pcnt            |
| 13       | Uhrf1           |
| 14       | Gabrg1          |
| 15       | Ckb             |
| 16       | Ube2c           |
| 17       | Col1a1          |
| 18       | Foxm1           |
| 19       | Smo             |
| 20       | Nfix            |
| 21       | Gria3           |
| 22       | Spag5           |
| 23       | Ccne1           |
| 24       | Rec8            |
| 25       | Grin2d          |
| 26       | Mcm2            |

27 Kcnn1  
28 Apoe  
29 Hmgn2  
30 Slc2a3  
31 Dlgap1  
32 Fcgrt  
33 Dll3  
34 Calb2  
35 Snmp200  
36 Man1a  
  
37 Hlf  
38 Grm3  
39 Ptrf  
40 Cacna1e  
41 Kifc2  
42 Eno2  
43 9330159F19Rik  
44 Sst  
45 Ndr2  
46 Aqp1  
47 Chmp2b  
48 Lbr  
49 Crabp2  
50 Nes  
51 Bcan  
52 Slc25a18  
53 Syt5  
54 Ndr1  
55 Polr2a  
56 Spc25  
57 Slc1a6  
58 Slc1a3  
59 Nid1  
60 Mcm5  
61 Asf1b  
62 Mef2c  
63 Ampd3  
  
64 Reep5  
  
65 Otx1  
66 Fam131c  
67 Cdc20  
68 Slc4a1

69 Nphs1  
70 Pola1  
71 Gmnn  
72 Tph2  
73 Syngn3  
74 Pole  
75 Stx1a  
76 Tinf2  
77 Khsrp  
78 Fhl2  
79 Rbfox1  
80 Fam163b  
81 Slc16a12  
82 Syn2  
83 Myt1  
84 Gabra1  
85 Odc1  
86 Kif11  
87 Phox2b  
88 Igf2bp1  
89 Aldh1a2  
90 Cad  
91 Dll1  
92 Slc25a13  
93 Abca1  
94 Cd83  
95 Hivep2  
96 Rxrg  
97 Celsr1  
98 Eef1a2  
99 E2f3  
100 Mapkapk2  
101 Brca1  
102 Vtn  
103 Timp2  
104 Rarb  
105 Cdc6  
106 Zfp334  
107 Rhbdl3  
108 Birc5  
109 Wfdc2  
110 Mmp9  
111 Slc12a5  
112 Slc12a7

113 Mybl2  
114 Rac3  
115 Erbb3  
116 Mfng  
117 Pmp22  
118 Kpna2  
119 Mapt  
  
120 G3bp1  
121 Gira2  
122 Cchr1  
123 Lhx1  
124 Abca5  
125 Sfrp5  
126 Sult4a1  
127 E2f2  
128 Scn1b  
129 Chtf18  
130 Syne1  
131 Fbxo5  
132 Rgs17  
133 Nr2e1  
134 Plagl1  
135 Grm1  
136 Perp  
137 Fabp7  
138 Nts  
139 Slc6a15  
140 Sim1  
141 Dcn  
142 Cdk1  
143 Tmpo  
144 Kittl  
145 Nedd1  
146 Stx7  
147 Moxd1  
148 Usp44  
149 Ascl1  
150 Igf1  
151 Egfr  
152 Grb10  
153 E2f7  
154 Col6a2  
155 Hmnr

156 Rasgef1c  
157 Nefh  
158 Btg2  
159 Igfbp3  
160 Adcy1  
161 Aebp1  
162 Prr11  
163 Gria1  
164 Fam49a  
165 Fam84a  
166 Id2  
167 Rrm2  
168 Ace  
169 Fam64a  
170 Pld2  
171 Doc2b  
  
172 Aurkb  
173 Pfas  
174 Top2a  
  
175 Sptb  
176 Cdca7l  
177 Efcab11  
178 Fbln5  
179 Tshz3  
180 Ppp1r13b  
181 Kif26a  
182 Gng4  
183 Amph  
184 Gli3  
185 Gadd45g  
186 Drd1a  
187 Adcy2  
188 Golm1  
189 Slc6a3  
190 Iqgap2  
191 Depdc1b  
192 Rasgrf2  
193 Nln  
194 Rgs7bp  
195 Htr1a  
196 Cdhr1  
197 Sh3bp5  
198 Arhgef3

199 Gdf10  
200 Ska3  
201 Cacna2d3  
202 Pbk  
203 Esco2  
204 Clu  
205 Bora  
206 Fgf17  
207 Haus4  
208 Ajuba  
209 Efs  
210 Sema5a  
211 Cmb1  
212 Rai14  
213 Cdh10  
214 Shcbp1  
215 Kcnv1  
216 Atad2  
217 Adcy8  
218 Gtse1  
219 Syng1  
220 Enpp2  
221 Shisa9  
222 Emp2  
223 Cldn1  
224 Fgf12  
225 Apod  
  
226 Scrib  
227 Lynx1  
228 Mapk12  
229 Alcam  
  
230 Pvr13  
231 Cd200  
232 Slc35a5  
233 Mcm4  
234 Nde1  
235 Boc  
236 Sidt1  
237 Ncam2  
238 Itgb5  
239 Adcy5  
240 Chaf1b  
241 Clic6

242 Tmem50b  
243 Faim2  
244 Racgap1  
245 Krt18  
246 Rttm  
247 Serinc2  
248 Kcnk5  
249 Dlx2  
250 Prph  
251 Cdca3  
252 Tiam2  
253 Thbs2  
254 Smoc2  
255 Pla2g7  
256 Sgol1  
257 Slc5a7  
258 Enpp5  
259 Pim1  
260 Ndc80  
261 Cyp1b1  
262 Lhcgr  
263 Nrxa1  
264 Hn1l  
265 Syt4  
266 Kifc5b  
267 Ndfip1  
268 Mal2  
269 Ppp2r2b  
270 Gnal  
271 Lox  
272 Cep192  
273 Lmnb1  
274 Slc22a6  
275 Anxa1  
276 Incenp  
277 Fads3  
278 Tmem2  
279 Cdca5  
280 Kif20b  
281 Gldc  
282 Pola2  
283 Apba1  
284 Slc1a1



285 Cep55  
286 Hells  
287 Lcor  
288 Afap112  
289 Ablim1  
290 Hspa12a  
291 Bhlhe22  
292 Arhgap19  
293 Lbx1  
294 Cdk2  
295 Cdh9  
296 Cbx2  
297 Gdap1  
298 Clec3b  
299 Ccr1  
300 Prkar1b  
301 Snca  
302 Paqr8  
303 Slc40a1  
304 Lancl1  
305 Ica1l  
306 Sgol2  
307 1500015O10Rik  
308 Sphkap  
309 Bard1  
310 2810459M11Rik  
311 Serpine2  
312 Ngef  
313 Asb1  
314 Lypd1  
315 Mcm6  
316 Cfh  
317 Dbi  
318 Slc45a3  
319 Pik3c2b  
320 Ppfia4  
321 Lamc2  
322 Parp1  
323 Vangl2  
324 Atp1b1  
325 Cenpf  
326 Nek2  
327 Mcm10  
328 Ddr2

329 Rgs5  
330 Mrc1  
331 Rabgap1l  
332 Prkcq  
333 Mastl  
  
334 Grb14  
335 Notch1  
336 Nacc2  
337 Grin1  
338 Rbms1  
339 Cybrd1  
  
340 Lrp2  
341 Traf6  
342 Cd82  
343 Mdk  
344 Wdr76  
345 Lrp4  
346 Lamp5  
347 Snap25  
348 Nusap1  
349 Casc5  
350 Pcna  
351 Bub1  
352 Pdyn  
353 Acss1  
354 Pkia  
355 Snx16  
356 Sall4  
357 Col9a3  
358 Mmp24  
359 Dsn1  
360 Rbl1  
361 Fam83d  
362 Ccna2  
363 Slc7a11  
364 Serpini1  
365 Hmgcs2  
366 Gpsm2  
367 Slc6a17  
368 Kcnc4  
369 Neurog2  
370 Gucy1b3  
371 Glrb

372 Enpep  
373 Cks1b  
374 Pmf1  
375 Iqgap3  
376 Sh3d19  
377 Them4  
378 Cdh17  
379 Anp32b  
380 Brinp1  
381 Zfp618  
382 Tnc  
383 Pappa  
384 Mpdz  
385 Tal2  
386 Kif24  
387 Sh3gl2  
388 Pde4b  
389 Orc1  
390 Col9a2  
391 Hivep3  
392 Kif2c  
393 Nasp  
394 Stil  
  
395 Pax7  
396 Sema3c  
397 Hpca  
398 Cdca8  
399 Sema3a  
400 Rpa2  
401 Mthfr  
402 Prom1  
403 Ppp2r2c  
404 Stk32b  
405 Fosl2  
406 Cgref1  
407 Ppargc1a  
408 Cenpa  
409 Gabra4  
410 Gabrb1  
411 Pdgfra  
412 Sparcl1  
413 Hsd17b11  
414 Cds1

415 Nos1  
416 Kntc1  
417 Uncx  
418 Tmem106b  
419 Lhx5  
420 Rph3a  
421 Col1a2  
422 Fam3c  
423 Eln  
424 Fezf1  
425 Asns  
426 Dync1i1  
427 Akr1b8  
428 Igf2bp3  
429 Npy  
430 Slc13a4  
431 Kel  
432 C130060K24Rik  
433 Tgfa  
434 Cntn3  
435 Chl1  
436 Aldh1l1  
437 Grip2  
438 Slc6a13  
439 Ret  
440 A2m  
441 Rasgef1a  
442 Emp1  
443 Grin2b  
444 Slco1c1  
445 Slco1a4  
446 Slc6a11  
447 Cand2  
448 Cd9  
449 Tspan11  
  
450 Oca2  
451 Dbx1  
452 Blm  
453 Hddc3  
454 Mfge8  
455 Ndufc2  
456 Kif22  
457 Nupr1

458 Tead2  
459 Plk1  
460 Rrm1  
461 Mki67  
462 Wee1  
463 Mrgprf  
464 Fgf15  
465 Syp  
466 Slc38a5  
467 Msn  
468 Efnb1  
469 Itm2a  
470 Gabra3  
471 Gas6  
472 Plat  
473 Sfrp1  
474 Plekha2  
475 Scrg1  
476 Sall1  
477 Irx3  
478 Irx5  
479 Cenpn  
480 Mt3  
481 Cntnap4  
482 Gpr56  
483 Cdh13  
484 Hsd11b2  
485 Jam3  
486 Thy1  
487 Acat1  
488 Cryab  
489 Mpzl2  
490 Robo3  
491 Olfm2  
492 Ccnb2  
493 Anxa2  
494 Kif23  
495 Pkm  
496 Stra6  
497 Nptn  
498 Rasgrf1  
499 Igdcc3  
500 Tipin

501 Zwilch  
502 Clstn2  
503 Cdc25a  
504 Cspg5  
  
505 Dclk3  
506 Topbp1  
507 Cpne4  
508 Ablim3  
509 Inpp1  
510 Cntrob  
511 Troap  
512 Pdxk  
513 Ccdc85a  
514 Camkv  
515 Sox10  
516 C330027C09Rik  
517 Gas7  
518 Ttf2  
519 Wnt6  
520 Szt2  
521 Tll4  
522 Galnt9  
523 4833424O15Rik  
524 Snap91  
525 Adamts15  
526 Cdc14a  
527 Rfwd3  
528 Cplx1  
529 Emx1  
530 Fndc3c1  
531 Recql4  
532 Map9  
533 Gucy1a3  
534 Zswim5  
535 Aspm  
536 Kcnk1  
537 Fancd2  
538 Wbscr17  
539 Fstl5  
540 Tmem132d  
541 Kif4  
542 Brip1  
543 Cbl

544 Ramp1  
545 Barhl2  
546 Six4  
547 Gbx2  
548 Slc41a2  
549 Fras1  
  
550 Pcdh11x  
551 BC030867  
552 Larp6  
553 Sncb  
554 Ncaph  
555 Htr2a  
556 Dpp4  
557 Baz1a  
558 Rims4  
559 Kihl35  
  
560 Pcdh17  
561 Lfn5  
562 Zswim4  
563 Melk  
564 Ddx11  
565 Syt1  
566 Tmem59l  
567 Zranb3  
568 Sostdc1  
569 Csgalnact1  
570 Gng12  
571 Npy1r  
572 Ndr4  
573 Fxyd7  
574 Aaas  
575 Zcchc12  
576 Dner  
577 Kif15  
578 Anln  
579 Dpp10  
580 Wnt4  
581 Dna2  
582 Fzd8  
583 Slc39a12  
584 Wnt8b  
585 Spry3  
586 1110059M19Rik

587 Ppp1r14a  
588 Islr  
589 Clic4  
590 Itih2  
591 Tacc3  
592 Nov  
593 Endod1  
594 4930427A07Rik  
595 Dtl  
596 Zmat4  
597 Dlgap5  
598 Wdhd1  
599 Cldn11  
600 Ckap2  
601 Slc16a9  
602 Neurod6  
603 Rmi2  
604 Igsf9  
605 Cramp1l  
606 Haus6  
607 AW551984  
608 Camk4  
609 Notch3  
610 Ncapd2  
611 Ttk  
612 Rgs4  
613 Pold1  
614 Hoxb4  
  
615 Trhr  
616 Bmp6  
617 Cpq  
618 En2  
619 Htr5a  
620 F13a1  
621 Gpr126  
622 Akna  
623 Cdk5rap2  
624 AF529169  
625 March4  
626 Neil3  
627 Tspyl4  
628 Cntn5  
629 Mmd2



630 Grin3a  
631 Rbms3  
632 Strip2  
633 Kcne2  
634 Ldb2  
635 Raly1  
636 Slc6a5  
637 Bahcc1  
638 Exo1  
639 Cpeb2  
640 Gabbr2  
641 Negr1  
642 Gjb6  
643 Bub1b  
644 Gramd1b  
645 Abcc8  
646 Kcns1  
647 2810417H13Rik  
648 Sema3d  
649 Dnm3  
650 Pacsin1  
651 Hey1  
652 Cdh18  
653 Cdh12  
654 Necab1  
655 Erc2  
656 Ppp1r14c  
657 Hnmpul1  
658 Six5  
659 Erf  
660 Atp1a3  
661 Rcc2  
662 Slc22a2  
663 Npnt  
664 Nrg3  
665 Map7d2  
666 Nbl1  
667 H2afv  
668 Dnah7b  
669 Brca2  
  
670 Chd7  
671 Rbbp8  
672 Car8

673 Nkx6-2  
674 Atp1b2  
675 Cldn5  
676 Gpr12  
677 Kif14  
678 Ago1  
679 Fmod  
680 Nlrp5-ps  
681 Cdc42ep4  
682 Mpped1  
683 Trpc5  
684 Myrip  
685 Abca9  
686 Mcm3  
687 S100a10  
688 Foxn4  
689 Ncapg2  
690 Bend6  
691 Grap2  
692 Dmrt3  
693 Adora1  
694 Clspn  
695 Kcnj12  
696 Jhdm1d  
697 Hebp1  
698 Muc1  
699 Lrrtm3  
700 Onecut1  
701 Tmem130  
702 A030009H04Rik  
703 Eln2  
704 Acpl2  
705 Dmrt1  
706 Emx2  
707 Fam19a2  
708 Rnf182  
709 Cdc25c  
710 Snhg11  
711 Shisa2  
712 Fam46c  
713 Cnrip1  
714 D3Bwg0562e  
715 Fzd1

716 Cnpy1  
717 Ccnjl  
718 Kcnj10  
719 Syt16  
720 Ankrd34b  
721 Prkce  
722 Lingo2  
723 Sox3  
724 Shroom2  
  
725 Cenph  
726 Cenpe  
727 Bhlhe23  
728 Penk  
729 Frrs1l  
730 Olig3  
731 Dbx2  
732 Chm2  
733 Mms22l  
734 Sdpr  
735 Hpcal4  
736 Chm3  
737 Olig1  
738 Iqub  
739 Hepacam  
740 Hs3st2  
741 Gjb2  
742 C77370  
743 Ticrr  
744 Hrk  
745 Olfml2a  
746 Nxph3  
747 Ppp1r3b  
748 Vat1l  
749 Spsb4  
750 Zfp41  
751 Dmrta2  
752 Cyp4x1  
753 Helt  
754 C2cd3  
755 Mc4r  
756 Gap43  
757 Mettl21c  
758 Rnf152

759 Lix1  
760 Cdca4  
761 Diras2  
762 Hes5  
763 Tmem72  
764 Rbm15  
765 Col6a3  
766 Nwd1  
767 Ckap2l  
768 Pou4f1  
769 Fgfbp1  
770 Gli2  
771 Nhlh2  
772 Sp8  
773 Igf2  
774 Lonrf2  
775 Vstm2a  
776 Neurog1  
777 Cdca2  
778 Atp13a5  
779 Rapgef4  
  
780 Pcdh10  
781 Frmd3  
782 Zfp219  
783 Htr1b  
784 Rps23  
785 Grm5  
786 2610318N02Rik  
787 H2afx  
788 Fzd2  
789 Neto1  
790 Trhde  
791 Scg2  
792 Gja1  
793 Kcns2  
794 Prkca  
795 Lin28a  
796 Lingo3  
797 Mblac2  
798 Sv2c  
799 Plcb1  
800 Ercc6l  
801 Gen1

802 Msrb3  
803 Nhlh1  
804 4930422G04Rik  
805 Ncald  
806 Plagl2  
807 Mest  
808 Klhdc1  
809 Slc6a7  
810 Hbb-y  
811 Hbb-bh1  
812 Gpr17  
813 Nup188  
814 Gas1  
815 Jam2  
816 E330013P04Rik  
817 Gsx1  
818 Mapk11  
819 Arhgap20  
820 Aldh1a1  
821 Kdm3a  
822 Plxnb1  
823 Ppfia2  
824 6330403A02Rik  
825 Tmem179  
826 Nt5dc3  
827 Skp2  
828 4922502B01Rik  
829 Msi1  
830 Vsnl1  
831 Adam12  
832 Srsf12  
833 Tmem158  
834 Nyap2  
  
835 Lrtm2  
836 Gabrg3  
837 Gabra5  
838 Ntrk2  
839 Nell1  
840 Maf  
841 Alk  
842 Hba-x  
843 Cdca7  
844 Gpc3

845 Nap113  
846 Abcd2  
847 9330182L06Rik  
848 Car10  
849 Col8a2  
850 Synpr  
851 Adap1  
852 Pign  
853 Mpz  
854 Tmp1  
855 Fry  
856 Grm7  
857 Hmga2  
858 Pou3f4  
859 Jakmip3  
860 Magel2  
861 Rit2  
862 Gnai1  
863 Ldoc1  
864 Lepr  
865 Camk2b  
866 Gm10036  
867 Tspan7  
868 Espl1  
869 Spock2  
870 Znf2  
871 Gda  
872 Capn11  
873 Tubb2a  
874 Fam19a1  
875 Hopx  
876 Ntm  
877 Scrt2  
878 Dcc  
879 Hist1h4i  
880 Slc9a6  
881 Kcnd2  
882 Csm1  
883 Slc4a4  
884 Cdh3  
885 Gm10093  
886 Lsamp  
887 Naca

888 Tmem151a  
889 Sox21  
  
890 Mdc1  
891 Ttr  
892 Unc13c  
893 Cks2  
894 Opcml  
895 Trank1  
896 Nsl1  
897 Sim2  
898 Tmem117  
899 Luzp2  
900 Cyp26b1  
901 Jazf1  
902 Sox11  
903 Jakmip1  
904 Alms1  
905 Slc24a3  
906 Nlgn1  
907 Cadm2  
908 Sepp1  
909 Knkc1  
910 Gm10184  
911 Cntnap5b  
912 Hes6  
913 Xpo5  
914 Lgi1  
915 Ppp1r3c  
916 Cbln4  
917 Pdna-ps2  
918 Zic3  
919 Nini  
920 Col8a1  
921 Slc4a5  
922 Cep152  
923 Gpr88  
924 Celsr2  
925 Psrc1  
926 Col28a1  
927 Ddx3y  
  
928 Slc7a14  
929 Nxph2  
930 Gpr98

931 Lyz2  
932 Nkain2  
933 Hba-a2  
934 Ccnd1  
935 Fam217b  
936 Tmem132b  
937 Peg12  
938 Cntnap5a  
939 Gm10282  
940 Zfp804a  
941 Jund  
942 Syndig1l  
943 Grid2  
944 Ccnf  
  
945 Sod3  
946 Arhgdig  
947 Mob3b  
948 4632427E13Rik  
949 Spc24  
950 Mafb  
951 Zcchc3  
952 Thbd  
953 Ctxn2  
954 Pak6  
955 Fbin  
956 Gm12184  
957 Nrarp  
958 Fam43b  
959 AI593442  
960 Aunip  
961 Hs3st4  
962 Kifc1  
963 Clec2l  
964 Fzd10  
965 Gm12371  
966 Gm14342  
967 D030055H07Rik  
968 9130020K20Rik  
969 Ier5l  
970 Gm16586  
971 3110047P20Rik  
972 Pcp4  
973 Mndal



974 Cdr1  
975 Tcerg1l  
976 D17H6S56E-5  
977 Smim17  
978 Pou3f2  
979 H1f0  
980 Fam181a  
981 Galntl6  
982 Gm26872  
983 Miat  
984 Gm5101  
985 Gm26981  
986 Gm17750  
987 Gm27031  
988 Pclo  
989 KCTD12  
990 RP24-312B12.1

Gene-level DE isoform heatmap

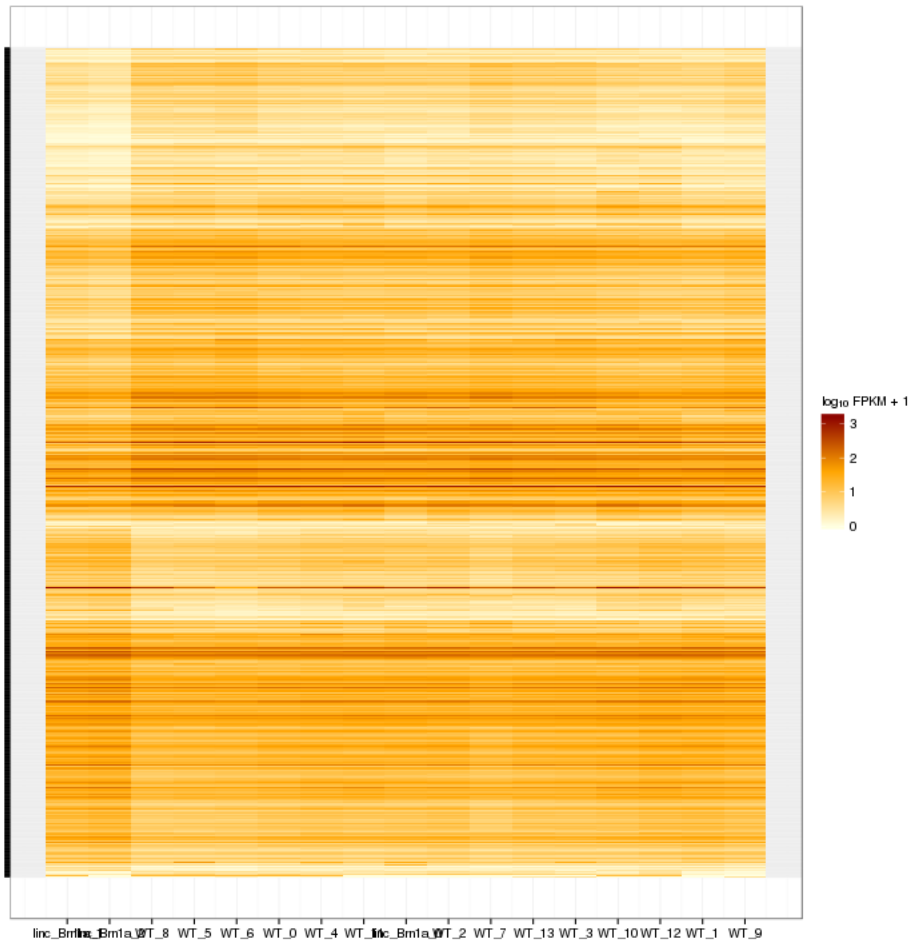

Isoform foldchange heatmap by isoform:

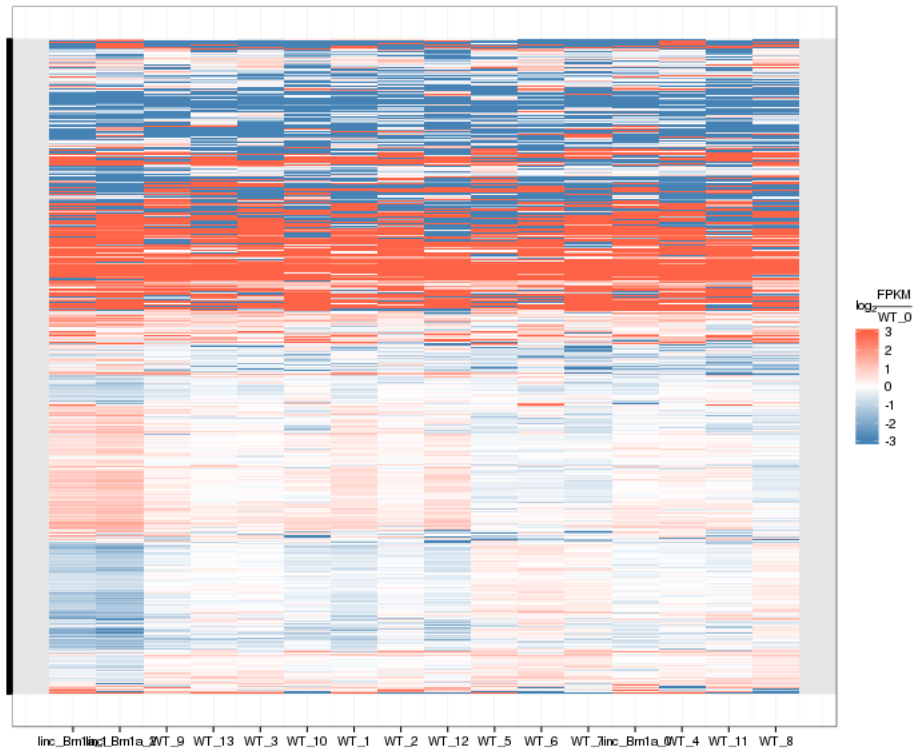

## Differential Splicing between conditions

(eval false for first pass)

Per condition differences in isoforms (Does gene have diff piechart between conditions?)

These genes are:

Splicing heatmap by isoform:

Splicing heatmap by gene

The following are significantly differentially spliced genes (relative portion of isoform per condition):

## Gene/Pathway Analysis

### GSEA

Enrichment and zscores are calculated based on expression in KO vs WT ( $\text{fpkmKO}/\text{fpkmWT}$ ), so genes that are down regulated in KO are shown in blue, while upregulation is shown in red.

KO/WT Blue = down in KO Red = Up in KO

Biocarta enrichment:

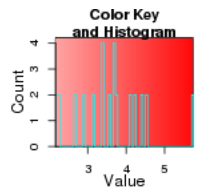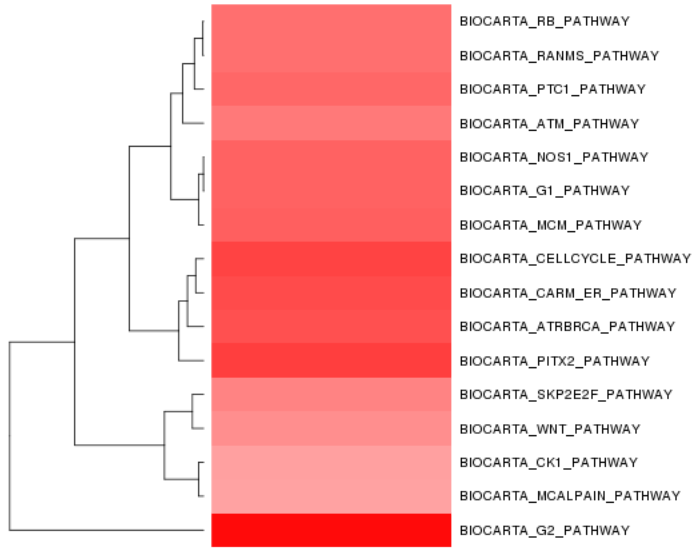

Biocarta zscore:

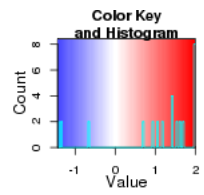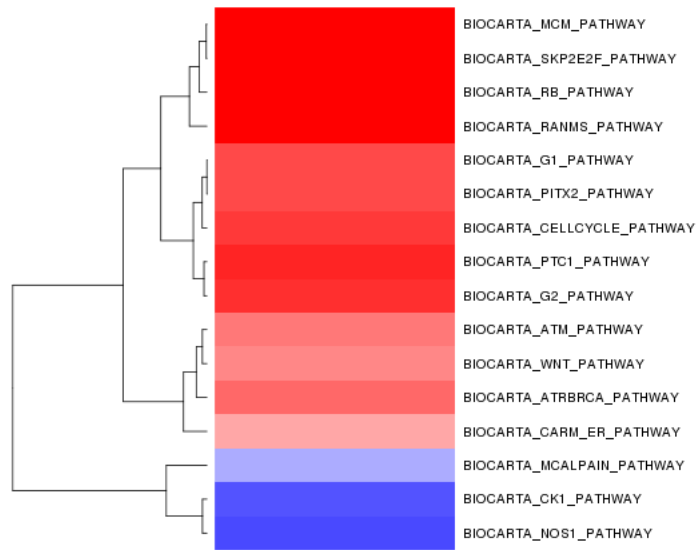

Reactome enrichment:

## Error: no locations are finite

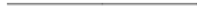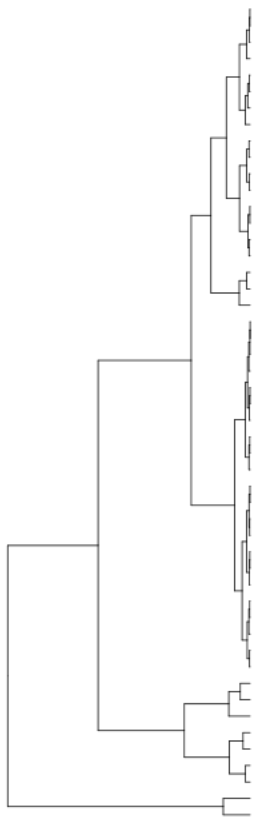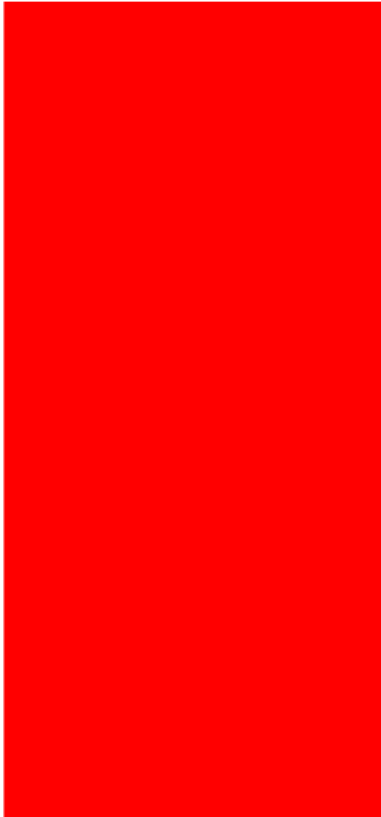

REACTOME\_CHROMOSOME\_MAINTENANCE  
REACTOME\_SIGNALING\_BY\_GPCR  
REACTOME\_GPCR\_DOWNSTREAM\_SIGNALING  
REACTOME\_TRANSCRIPTION  
REACTOME\_METABOLISM\_OF\_MRNA  
REACTOME\_TRANSPORT\_OF\_MATURE\_TRANS  
REACTOME\_TRANSMISSION\_ACROSS\_CHEMIC  
REACTOME\_HIV\_LIFE\_CYCLE  
REACTOME\_LATE\_PHASE\_OF\_HIV\_LIFE\_CYCL  
REACTOME\_S\_PHASE  
REACTOME\_METABOLISM\_OF\_NON\_CODING\_F  
REACTOME\_G2\_M\_CHECKPOINTS  
REACTOME\_DNA\_STRAND\_ELONGATION  
REACTOME\_CELL\_CYCLE\_CHECKPOINTS  
REACTOME\_RNA\_POL\_I\_TRANSCRIPTION  
REACTOME\_G1\_S\_TRANSITION  
REACTOME\_DNA\_REPAIR  
REACTOME\_MITOTIC\_G1\_G1\_S\_PHASES  
REACTOME\_MITOTIC\_PROMETAPHASE  
REACTOME\_TRANSPORT\_OF\_MATURE\_MRNA  
REACTOME\_INFLUENZA\_LIFE\_CYCLE  
REACTOME\_EXTENSION\_OF\_TELOMERES  
REACTOME\_ACTIVATION\_OF\_ATR\_IN\_RESPON  
REACTOME\_SYNTHESIS\_OF\_DNA  
REACTOME\_POTASSIUM\_CHANNELS  
REACTOME\_MITOTIC\_G2\_G2\_M\_PHASES  
REACTOME\_TELOMERE\_MAINTENANCE  
REACTOME\_ACTIVATION\_OF\_THE\_PRE\_REPLI  
REACTOME\_HIV\_INFECTION  
REACTOME\_TRANSPORT\_OF\_RIBONUCLEOPR  
REACTOME\_CLEAVAGE\_OF\_GROWING\_TRANS  
REACTOME\_G0\_AND\_EARLY\_G1  
REACTOME\_NEUROTRANSMITTER\_RECEPTOR  
REACTOME\_PLATELET\_ACTIVATION\_SIGNALIN  
REACTOME\_INTERACTIONS\_OF\_VPR\_WITH\_HC  
REACTOME\_DEADENYLATION\_DEPENDENT\_MI  
REACTOME\_TRANSMEMBRANE\_TRANSPORT\_C  
REACTOME\_NEP\_NS2\_INTERACTS\_WITH\_THE  
REACTOME\_GPCR\_LIGAND\_BINDING  
REACTOME\_CLASS\_A1\_RHODOPSIN\_LIKE\_RE  
REACTOME\_M\_G1\_TRANSITION  
REACTOME\_PROCESSING\_OF\_CAPPED\_INTRC  
REACTOME\_MRNA\_PROCESSING  
REACTOME\_DNA\_REPLICATION  
REACTOME\_MITOTIC\_M\_M\_G1\_PHASES  
REACTOME\_MRNA\_SPLICING  
REACTOME\_METABOLISM\_OF\_RNA  
REACTOME\_NEURONAL\_SYSTEM  
REACTOME\_CELL\_CYCLE  
REACTOME\_CELL\_CYCLE\_MITOTIC

Reactome zscore:

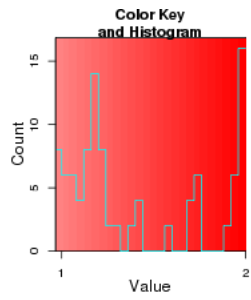

\_\_\_\_\_

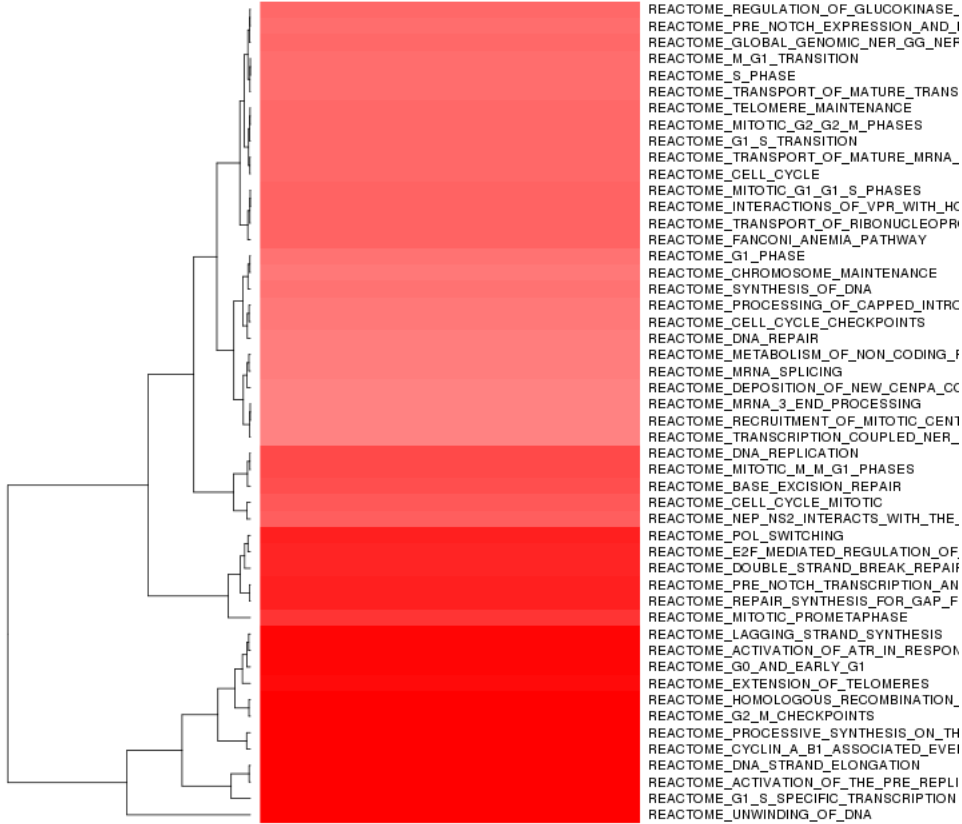

Kegg enrichment:

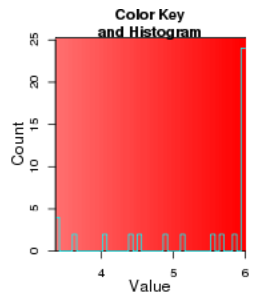

\_\_\_\_\_

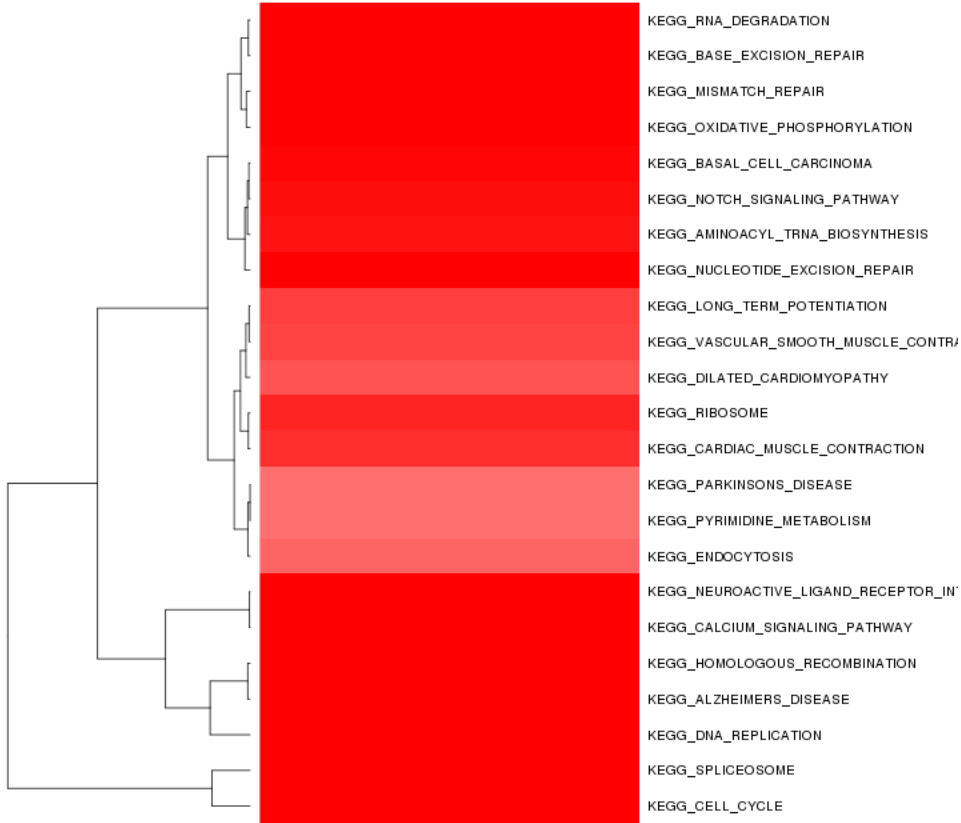

Kegg zscore:



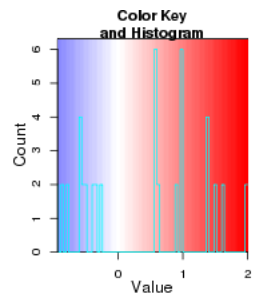

\_\_\_\_\_

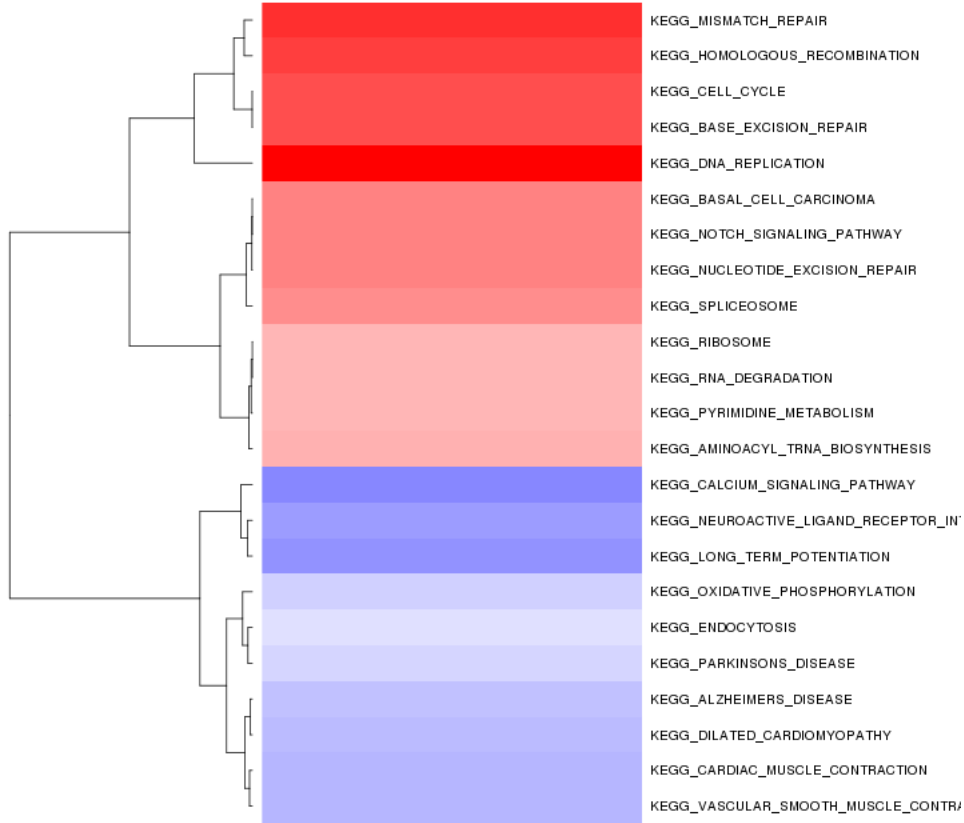

Interneuron enrichment:

## Error: no locations are finite



Lhx6\_genes

5HT\_genes

Interneuron zscore:

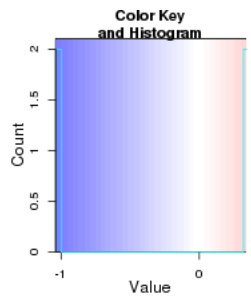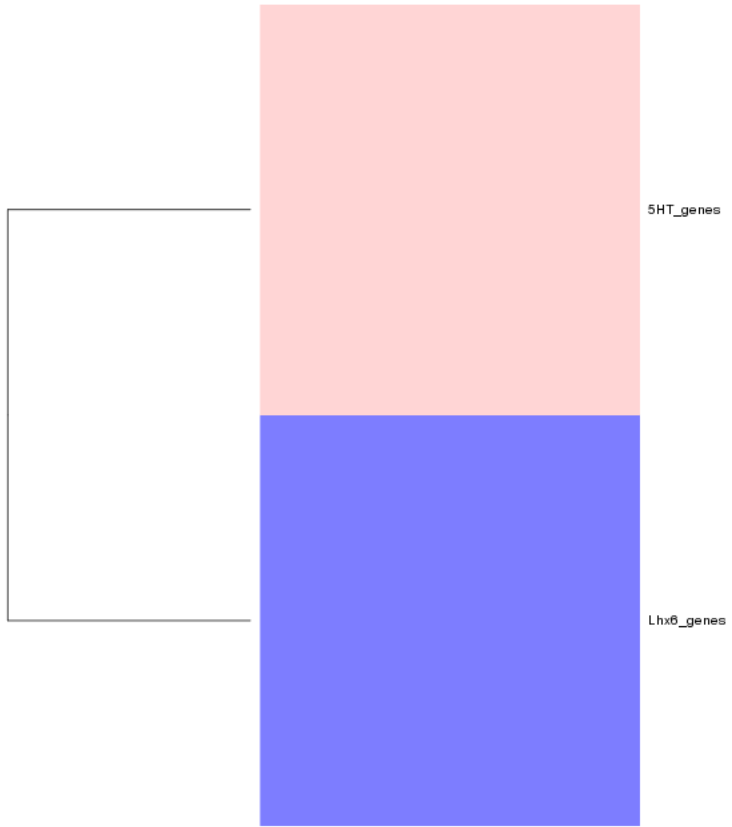

Oncogene enrichment:

```
## Error: subscript out of bounds
```

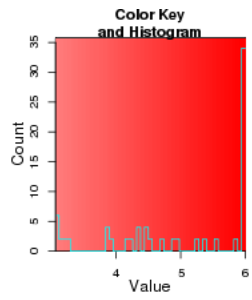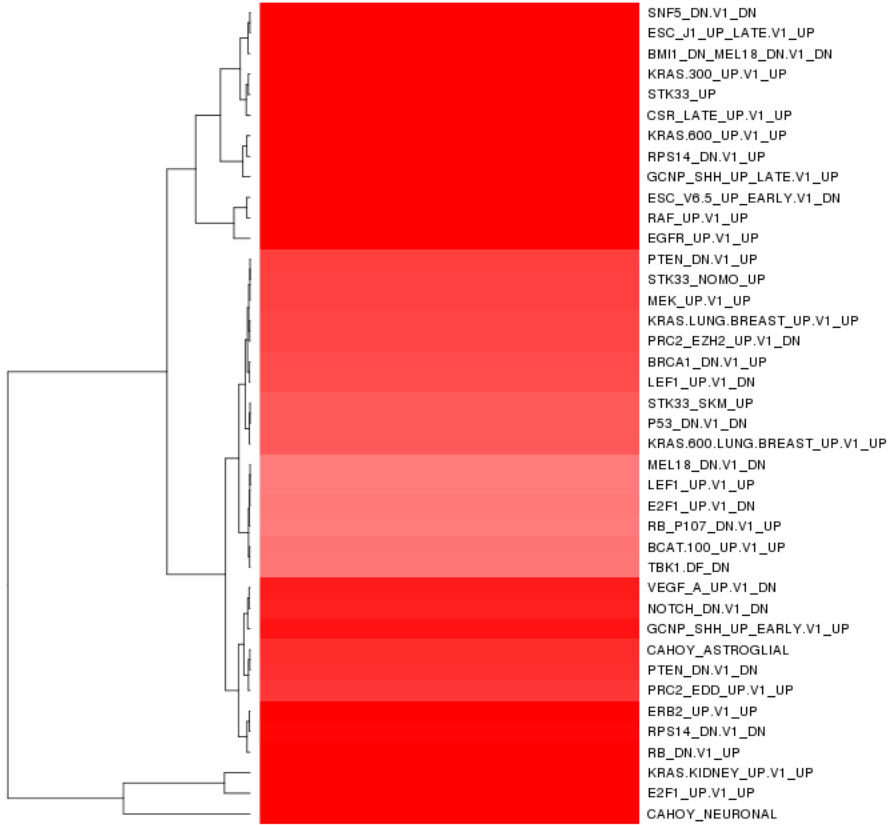

Oncogene zscore:

## Error: subscript out of bounds

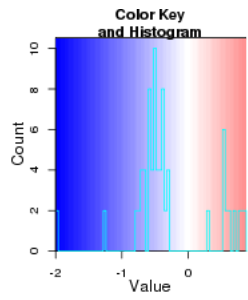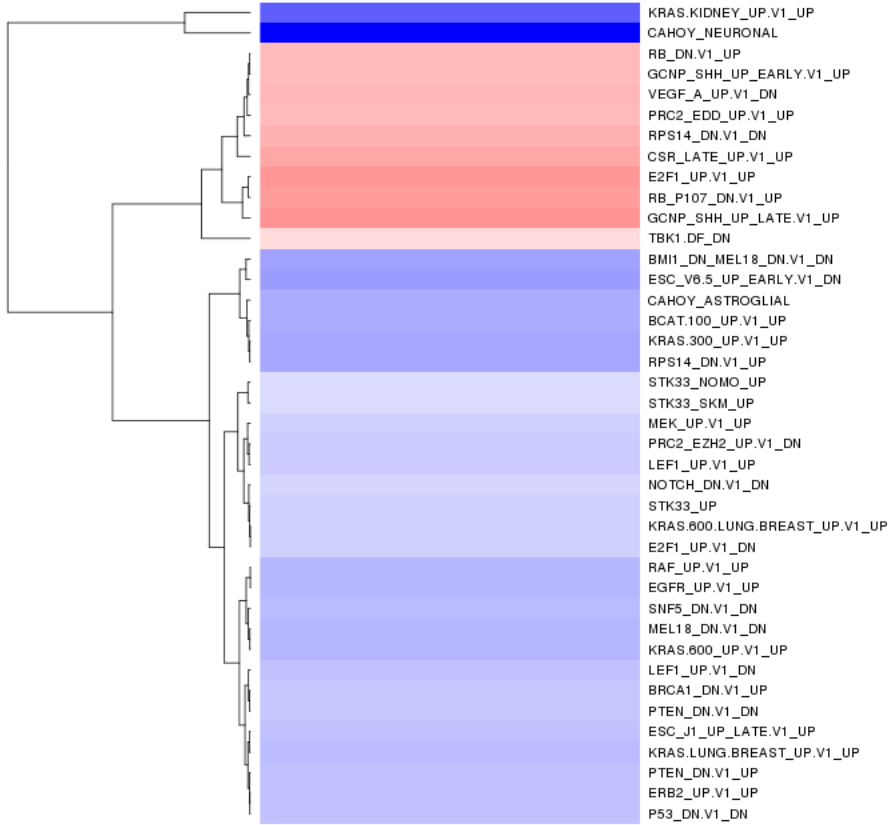

Immuno enrichment:

## Error: no locations are finite



\_\_\_\_\_

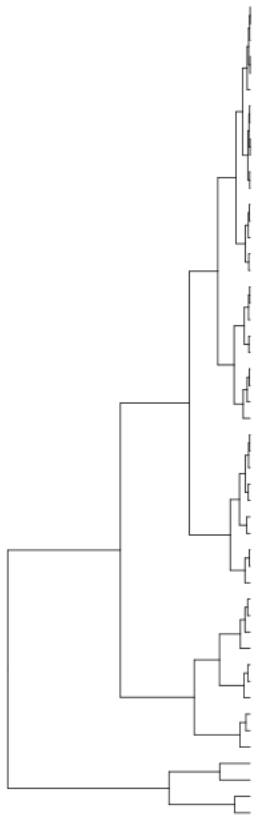

GSE15930\_NAIVE\_VS\_72H\_IN\_VITRO\_STIM\_TF  
GSE19825\_NAIVE\_VS\_IL2RAHIGH\_DAY3\_EFF\_  
GSE22886\_UNSTIM\_VS\_STIM\_MEMORY\_TCELL  
GSE17974\_0H\_VS\_24H\_IN\_VITRO\_ACT\_CD4\_T  
GOLDRATH\_EFF\_VS\_MEMORY\_CD8\_TCELL\_UF  
GSE15930\_NAIVE\_VS\_72H\_IN\_VITRO\_STIM\_IF  
GSE10239\_MEMORY\_VS\_KLRG1INT\_EFF\_CD8\_  
GSE3982\_MAST\_CELL\_VS\_TH2\_DN  
GSE27786\_LIN\_NEG\_VS\_MONO\_MAC\_UP  
GSE31082\_DP\_VS\_CD8\_SP\_THYMOCYTE\_UP  
GSE10239\_NAIVE\_VS\_DAY4.5\_EFF\_CD8\_TCEL  
GSE3982\_NKCELL\_VS\_TH2\_DN  
GSE10325\_LUPUS\_CD4\_TCELL\_VS\_LUPUS\_M  
GSE12845\_IGD\_POS\_BLOOD\_VS\_DARKZONE\_  
GSE1460\_INTRATHYMIC\_T\_PROGENITOR\_VS\_  
GSE12845\_IGD\_NEG\_BLOOD\_VS\_PRE\_GC\_TO  
GSE15767\_MED\_VS\_SCS\_MAC\_LN\_UP  
GSE31082\_DN\_VS\_CD4\_SP\_THYMOCYTE\_UP  
GSE12845\_IGD\_NEG\_BLOOD\_VS\_DARKZONE\_  
GSE24634\_TREG\_VS\_TCONV\_POST\_DAY3\_IL4  
GSE15930\_NAIVE\_VS\_48H\_IN\_VITRO\_STIM\_IL  
GSE19825\_CD24LOW\_VS\_IL2RA\_HIGH\_DAY3\_  
GSE7852\_LN\_VS\_THYMUS\_TCONV\_DN  
GSE9006\_TYPE\_1\_VS\_TYPE\_2\_DIABETES\_PB  
GSE12845\_IGD\_POS\_BLOOD\_VS\_PRE\_GC\_TO  
GSE7460\_CD8\_TCELL\_VS\_TREG\_ACT\_DN  
GSE24634\_TEFF\_VS\_TCONV\_DAY3\_IN\_CULTU  
GSE24634\_TREG\_VS\_TCONV\_POST\_DAYS\_IL4  
GSE15930\_NAIVE\_VS\_24H\_IN\_VITRO\_STIM\_IN  
GSE14000\_TRANSLATED\_RNA\_VS\_MRNA\_4H\_  
GSE15930\_NAIVE\_VS\_48H\_IN\_VITRO\_STIM\_IF  
GSE1460\_INTRATHYMIC\_T\_PROGENITOR\_VS\_  
GSE15930\_NAIVE\_VS\_48H\_IN\_VITRO\_STIM\_CI  
GSE15930\_NAIVE\_VS\_24H\_IN\_VITRO\_STIM\_IL  
GSE24634\_TEFF\_VS\_TCONV\_DAYS\_IN\_CULTU  
GSE15930\_NAIVE\_VS\_24H\_IN\_VITRO\_STIM\_CI  
GSE24634\_TREG\_VS\_TCONV\_POST\_DAY3\_IL4  
GSE36476\_CTRL\_VS\_TSST\_ACT\_40H\_MEMOR  
GSE22886\_UNSTIM\_VS\_IL15\_STIM\_NKCELL\_D  
GSE7764\_IL15\_TREATED\_VS\_CTRL\_NK\_CELL\_  
GSE24634\_TEFF\_VS\_TCONV\_DAY7\_IN\_CULTU  
GSE24634\_TREG\_VS\_TCONV\_POST\_DAY7\_IL4  
GSE24026\_PDI\_LIGATION\_VS\_CTRL\_IN\_ACT\_  
GSE36476\_CTRL\_VS\_TSST\_ACT\_40H\_MEMOR  
GSE36476\_CTRL\_VS\_TSST\_ACT\_72H\_MEMOR  
GSE36476\_CTRL\_VS\_TSST\_ACT\_72H\_MEMOR  
GSE15750\_DAY6\_VS\_DAY10\_TRAF6KO\_EFF\_C  
GSE15750\_DAY6\_VS\_DAY10\_EFF\_CD8\_TCELL  
GSE22886\_UNSTIM\_VS\_IL2\_STIM\_NKCELL\_DN  
GSE30962\_PRIMARY\_VS\_SECONDARY\_ACUTE

Immuno zscore:

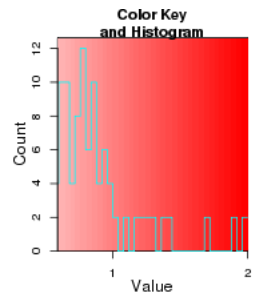

\_\_\_\_\_

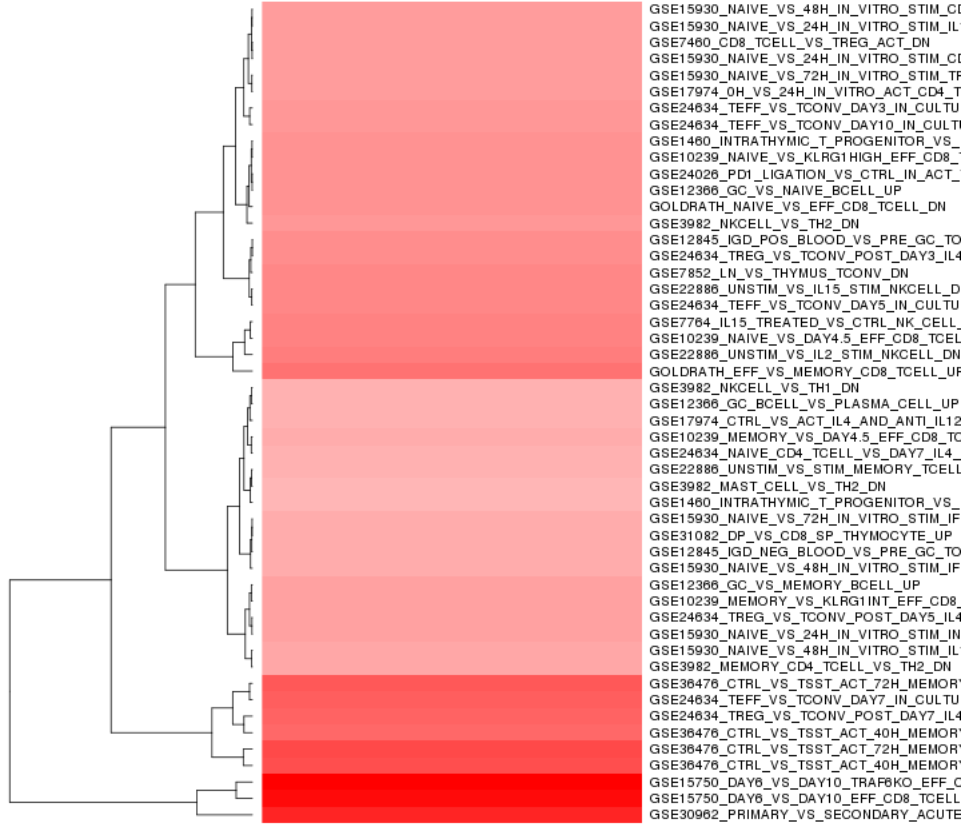

TF enrichment:

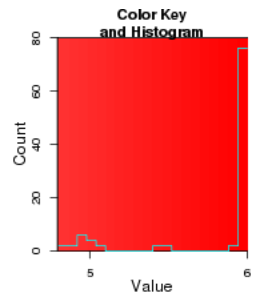

\_\_\_\_\_

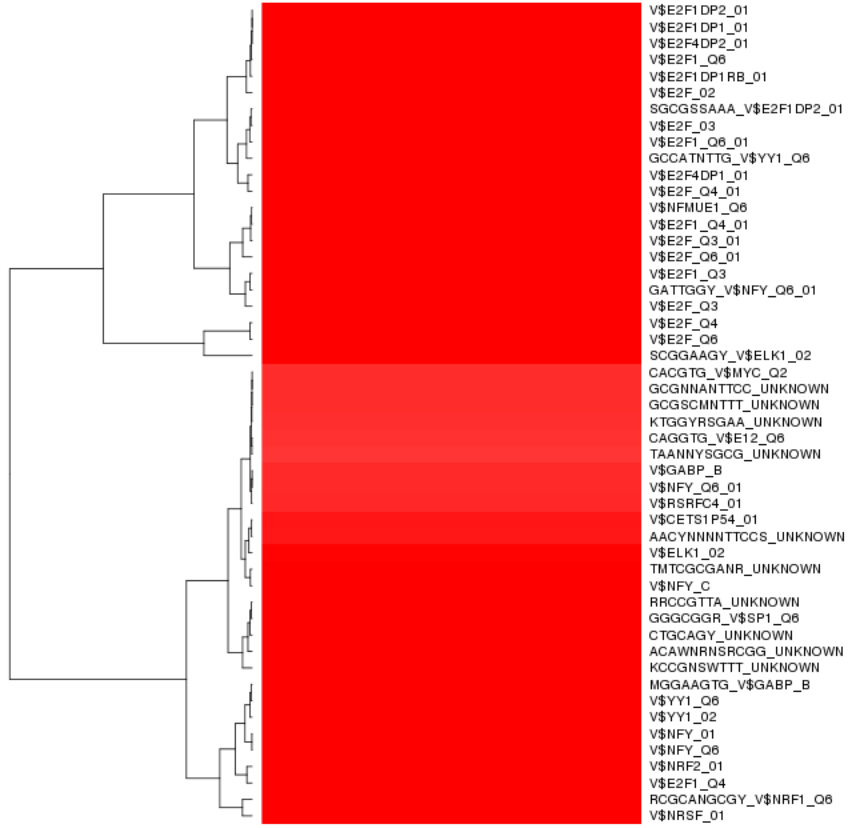

TF zscore:



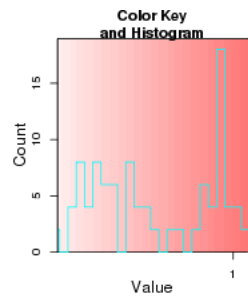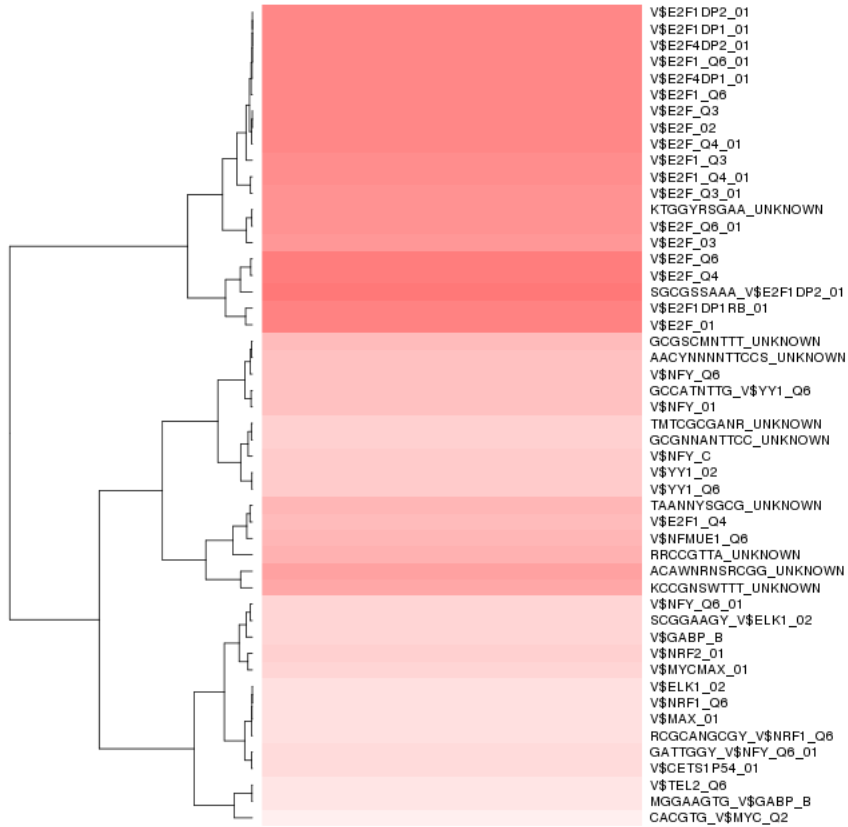

## GO enrichment

Cluster profiler used to call enrichments of significantly differentially regulated genes that map to Entrez IDs.



cell part  
cell  
GO

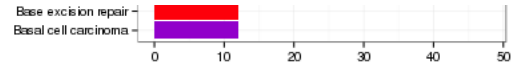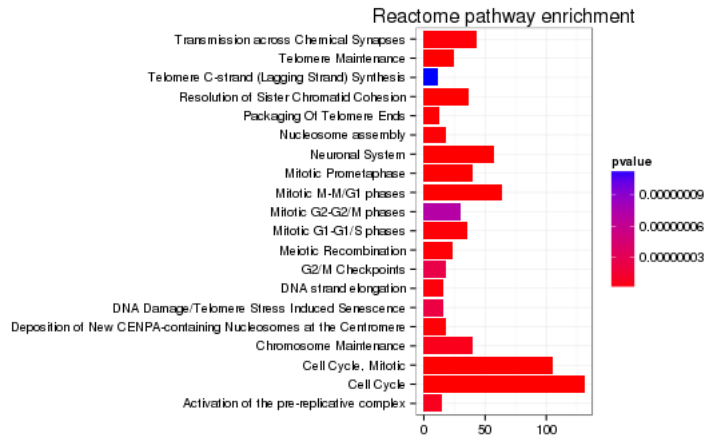

## Enrichment or depletion for stage-specific cell cycle markers

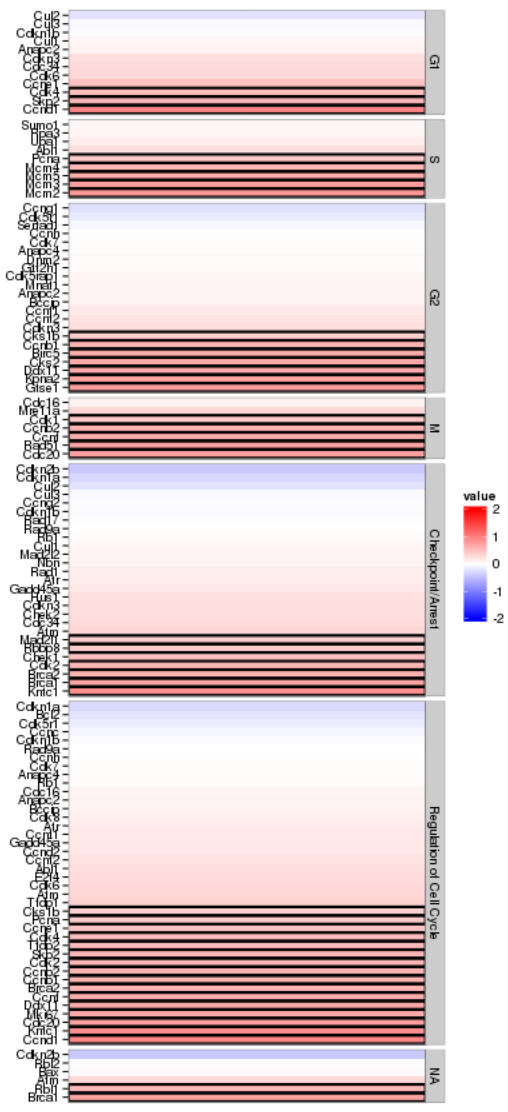

Enrichment or depletion for markers of specific cortical layers

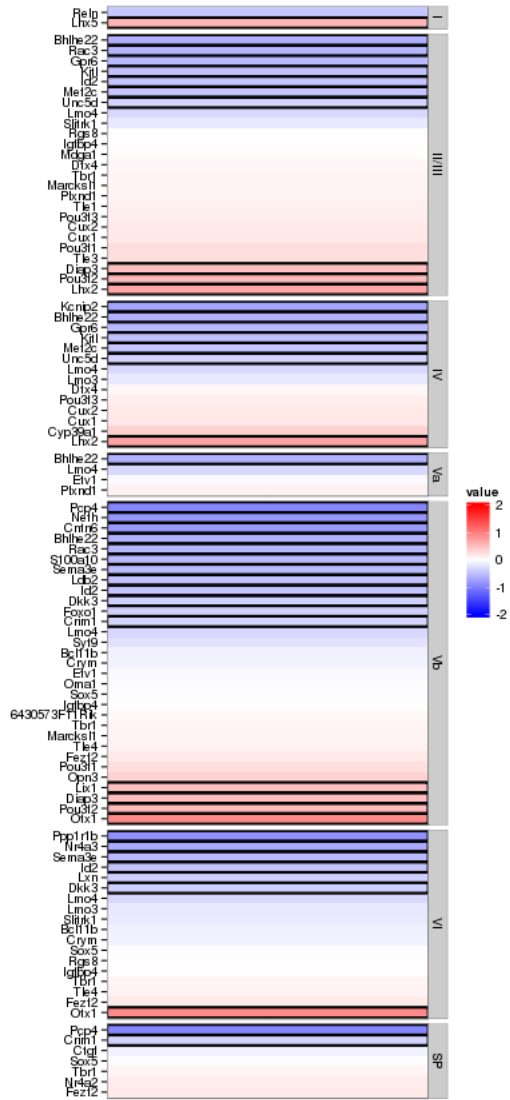

Enrichment or depletion for specific neural cell types

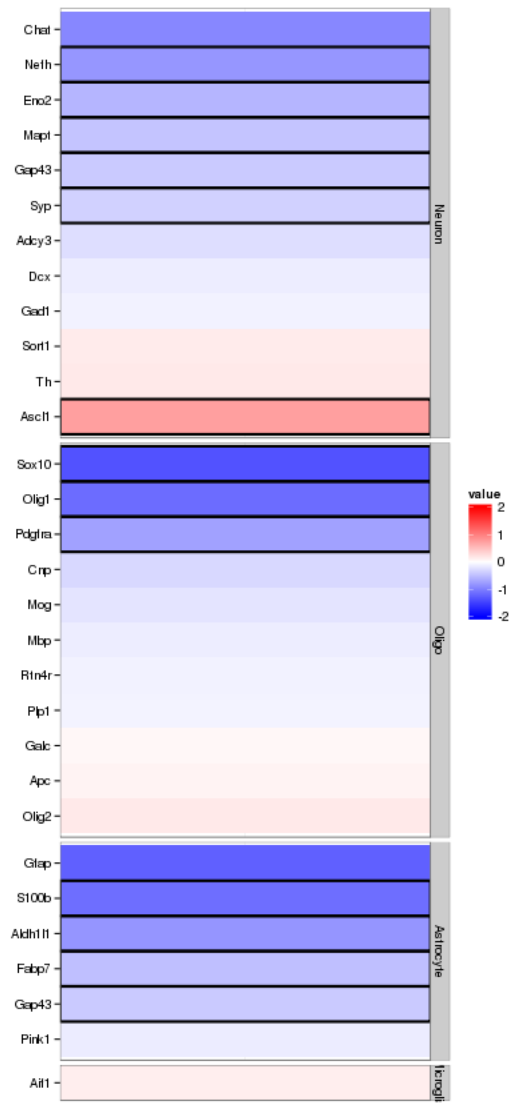

Enrichment or Depletion of neural differentiation markers

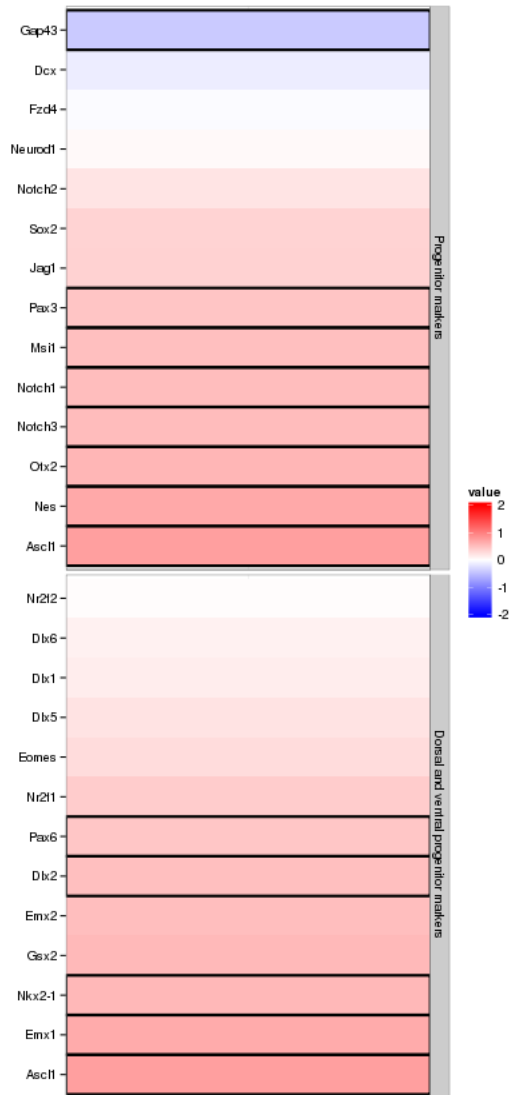

## Cis vs Trans (locally)

$\log_2$  Foldchange and test statistic are calculated with the ratio of  $\text{fpm(KO)}/\text{fpm(WT)}$ , thus the test\_stat is positive if a gene is higher in the KO and negative if a gene has lower expression in the KO

The pvalue for 3 genes significantly regulated in a region this size is: 0.6938

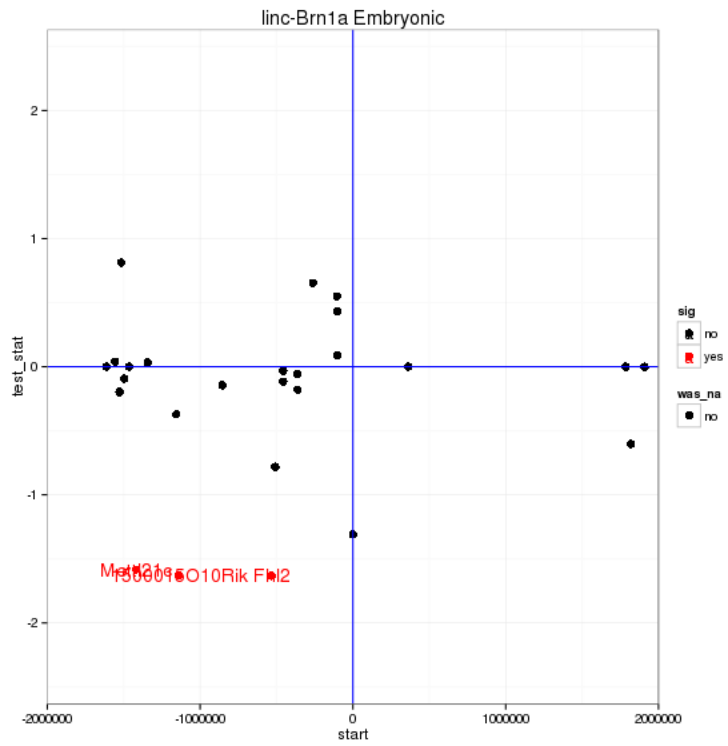

## Notes

Samples used are:

10

- 1 JR753
- 2 JR750
- 3 JR771
- 4 JR755
- 5 JR811
- 6 JR768
- 7 JR761
- 8 JR815
- 9 JR789
- 10 JR748
- 11 JR716
- 12 JR717
- 13 JR719
- 14 JR756



15 JR858  
16 JR859  
17 JR860

## Replicates

| file                                                                          | sample_name | replicate | rep_name    | total_mass  | norm_mass   | internal_scale | external_scale |
|-------------------------------------------------------------------------------|-------------|-----------|-------------|-------------|-------------|----------------|----------------|
| 1 /n/rinn_data1/seq/fgoff/Projects/BrainMap/data/quants/JR753/abundances.cxb  | WT          | 0         | WT_0        | 39331900.00 | 33371600.00 | 1.23           | 1.00           |
| 2 /n/rinn_data1/seq/fgoff/Projects/BrainMap/data/quants/JR750/abundances.cxb  | WT          | 1         | WT_1        | 36031100.00 | 33371600.00 | 1.07           | 1.00           |
| 3 /n/rinn_data1/seq/fgoff/Projects/BrainMap/data/quants/JR771/abundances.cxb  | WT          | 2         | WT_2        | 38857100.00 | 33371600.00 | 1.19           | 1.00           |
| 4 /n/rinn_data1/seq/fgoff/Projects/BrainMap/data/quants/JR755/abundances.cxb  | WT          | 3         | WT_3        | 41811300.00 | 33371600.00 | 1.25           | 1.00           |
| 5 /n/rinn_data1/seq/fgoff/Projects/BrainMap/data/quants/JR811/abundances.cxb  | WT          | 4         | WT_4        | 38172800.00 | 33371600.00 | 1.16           | 1.00           |
| 6 /n/rinn_data1/seq/fgoff/Projects/BrainMap/data/quants/JR768/abundances.cxb  | WT          | 5         | WT_5        | 28375200.00 | 33371600.00 | 0.87           | 1.00           |
| 7 /n/rinn_data1/seq/fgoff/Projects/BrainMap/data/quants/JR761/abundances.cxb  | WT          | 6         | WT_6        | 31706200.00 | 33371600.00 | 0.94           | 1.00           |
| 8 /n/rinn_data1/seq/fgoff/Projects/BrainMap/data/quants/JR815/abundances.cxb  | WT          | 7         | WT_7        | 29733100.00 | 33371600.00 | 0.90           | 1.00           |
| 9 /n/rinn_data1/seq/fgoff/Projects/BrainMap/data/quants/JR789/abundances.cxb  | WT          | 8         | WT_8        | 27681500.00 | 33371600.00 | 0.84           | 1.00           |
| 10 /n/rinn_data1/seq/fgoff/Projects/BrainMap/data/quants/JR748/abundances.cxb | WT          | 9         | WT_9        | 32367000.00 | 33371600.00 | 0.93           | 1.00           |
| 11 /n/rinn_data1/seq/fgoff/Projects/BrainMap/data/quants/JR716/abundances.cxb | WT          | 10        | WT_10       | 26144700.00 | 33371600.00 | 0.78           | 1.00           |
| 12 /n/rinn_data1/seq/fgoff/Projects/BrainMap/data/quants/JR717/abundances.cxb | WT          | 11        | WT_11       | 25565400.00 | 33371600.00 | 0.78           | 1.00           |
| 13 /n/rinn_data1/seq/fgoff/Projects/BrainMap/data/quants/JR719/abundances.cxb | WT          | 12        | WT_12       | 22697800.00 | 33371600.00 | 0.67           | 1.00           |
| 14 /n/rinn_data1/seq/fgoff/Projects/BrainMap/data/quants/JR756/abundances.cxb | WT          | 13        | WT_13       | 38948900.00 | 33371600.00 | 1.18           | 1.00           |
| 15 /n/rinn_data1/seq/fgoff/Projects/BrainMap/data/quants/JR858/abundances.cxb | linc_Bm1a   | 0         | linc_Bm1a_0 | 34867700.00 | 33371600.00 | 1.08           | 1.00           |
| 16 /n/rinn_data1/seq/fgoff/Projects/BrainMap/data/quants/JR859/abundances.cxb | linc_Bm1a   | 1         | linc_Bm1a_1 | 45282400.00 | 33371600.00 | 1.30           | 1.00           |
| 17 /n/rinn_data1/seq/fgoff/Projects/BrainMap/data/quants/JR860/abundances.cxb | linc_Bm1a   | 2         | linc_Bm1a_2 | 41604700.00 | 33371600.00 | 1.20           | 1.00           |

## Session Info

```
## R version 3.0.2 (2013-09-25)
## Platform: x86_64-unknown-linux-gnu (64-bit)
##
## locale:
## [1] LC_CTYPE=en_US.UTF-8      LC_NUMERIC=C
## [3] LC_TIME=en_US.UTF-8      LC_COLLATE=en_US.UTF-8
## [5] LC_MONETARY=en_US.UTF-8  LC_MESSAGES=en_US.UTF-8
## [7] LC_PAPER=en_US.UTF-8     LC_NAME=C
## [9] LC_ADDRESS=C             LC_TELEPHONE=C
## [11] LC_MEASUREMENT=en_US.UTF-8 LC_IDENTIFICATION=C
##
## attached base packages:
## [1] grid      parallel  methods  stats    graphics  grDevices  utils
## [8] datasets  base
##
## other attached packages:
## [1] plyr_1.8.1
## [2] stringr_0.6.2
## [3] seqbias_1.10.0
```

```

## [4] BSgenome.Mmusculus.UCSC.mm10_1.3.19
## [5] BSgenome_1.30.0
## [6] Biostrings_2.30.1
## [7] gdata_2.13.3
## [8] GO.db_2.10.1
## [9] org.Mm.eg.db_2.10.1
## [10] clusterProfiler_1.13.1
## [11] DOSE_2.0.0
## [12] ReactomePA_1.6.1
## [13] AnnotationDbi_1.24.0
## [14] Biobase_2.22.0
## [15] mgcv_1.7-29
## [16] nlme_3.1-117
## [17] RMySQL_0.9-3
## [18] RColorBrewer_1.0-5
## [19] gridExtra_0.9.1
## [20] gtable_0.1.2
## [21] marray_1.40.0
## [22] gplots_2.13.0
## [23] GSA_1.03
## [24] limma_3.18.13
## [25] xtable_1.7-3
## [26] cummeRbund_2.7.2
## [27] Gviz_1.6.0
## [28] rtracklayer_1.22.7
## [29] GenomicRanges_1.14.4
## [30] XVector_0.2.0
## [31] IRanges_1.20.7
## [32] fastcluster_1.1.13
## [33] reshape2_1.4
## [34] ggplot2_1.0.0
## [35] RSQLite_0.11.4
## [36] DBI_0.2-7
## [37] BiocGenerics_0.8.0
## [38] knitr_1.6
##
## loaded via a namespace (and not attached):
## [1] biomaRt_2.18.0      biovizBase_1.10.8   bitops_1.0-6
## [4] caTools_1.17        cluster_1.15.2      colorspace_1.2-4
## [7] dichromat_2.0-0     digest_0.6.4        DO.db_2.7
## [10] evaluate_0.5.5      formatR_0.10        Formula_1.1-1
## [13] GenomicFeatures_1.14.5 GOSemSim_1.20.3     graph_1.40.1
## [16] graphite_1.8.1      gtools_3.4.1        Hmisc_3.14-4
## [19] igraph_0.7.1        KEGG.db_2.10.1      KernSmooth_2.23-12
## [22] labeling_0.2        lattice_0.20-29     latticeExtra_0.6-26
## [25] MASS_7.3-33         Matrix_1.1-3        munsell_0.4.2
## [28] org.Hs.eg.db_2.10.1 proto_0.3-10        qvalue_1.36.0
## [31] Rcpp_0.11.2         RCurl_1.95-4.1      reactome.db_1.46.1
## [34] Rsamtools_1.14.3    scales_0.2.4        splines_3.0.2
## [37] stats4_3.0.2        survival_2.37-7     tcltk_3.0.2
## [40] tools_3.0.2         XML_3.98-1.1        zlibbioc_1.8.0

```

## Run Info

```
##          param
## 1      cmd_line
## 2          version
## 3  SVN_revision
## 4  boost_version
## 5          genome
##
## 1 cuffdiff -p 10 -L WT,linc-Brn1a -o /n/rinn_data1/seq/lgoff/Projects/BrainMap/data/diffs/linc-Brn1a_vs_WT_Embryonic /n/rinn_data1/seq/lgoff/Projects/Br
## 2
## 3
## 4
## 5
```

# linc-Brn1b KO vs WT (Adult)

This file shows the wt-v-ko comparison for linc-Brn1b.

Cuff overview:

```
## CuffSet instance with:  
## 2 samples  
## 26754 genes  
## 77524 isoforms  
## 0 TSS  
## 23066 CDS  
## 0 promoters  
## 0 splicing  
## 19954 relCDS
```

## QC

### Dispersion

Dispersion plot for genes in cuff: (Overdispersion can lead to innacurate quants)

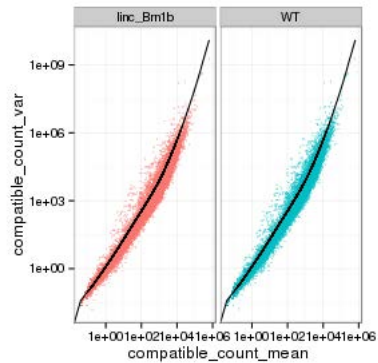

### Cross-replicate variability (fpkmSCVplot)

Differences in CV 2 can result in lower numbers of differentially expressed genes due to a higher degree of variability between replicate fpkm estimates.

Genes:

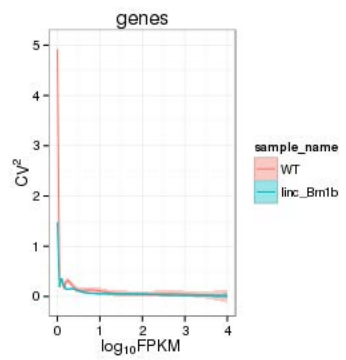

Isoforms:

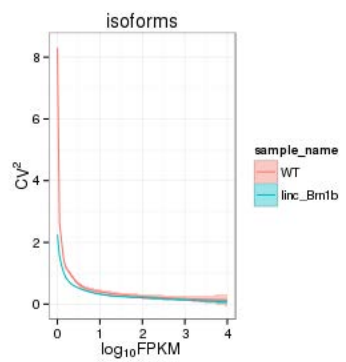

## MvA plot

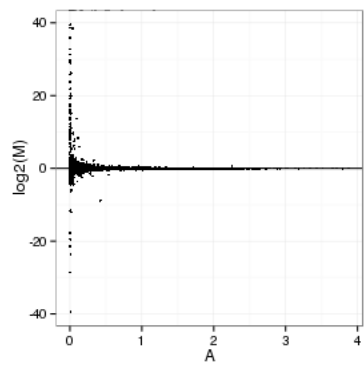

## MvA plot counts

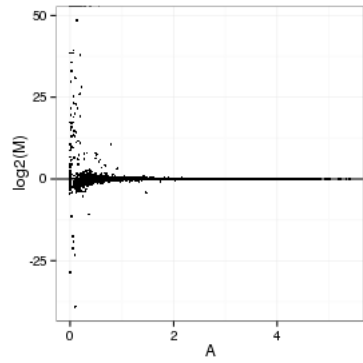

## Scatterplot matrix

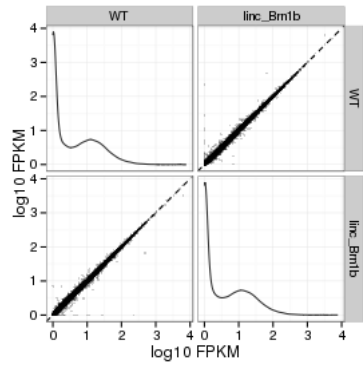

## Distributions

### Boxplots

Boxplot (genes)

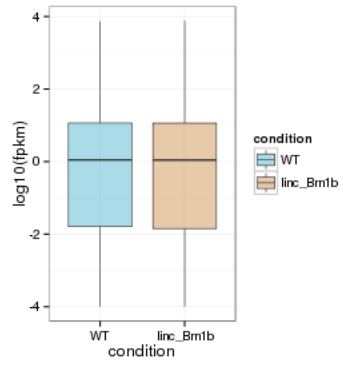

Boxplot (genes, replicates)

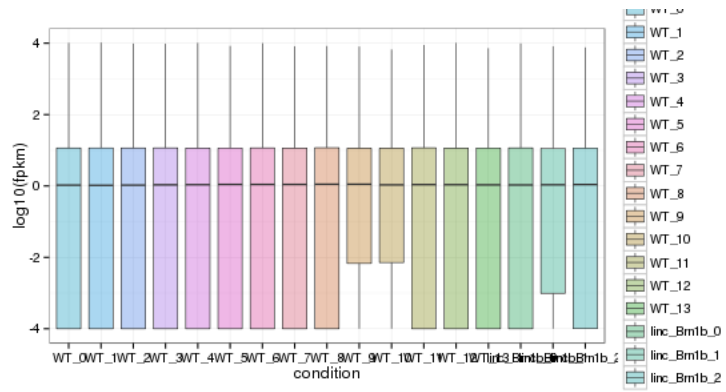

Boxplot (isoforms)

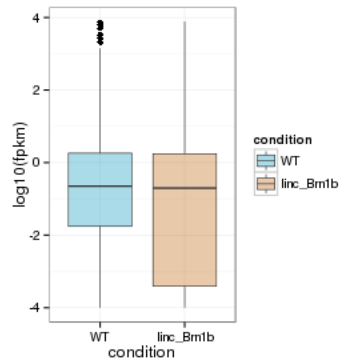

Boxplot (isoforms, replicates)

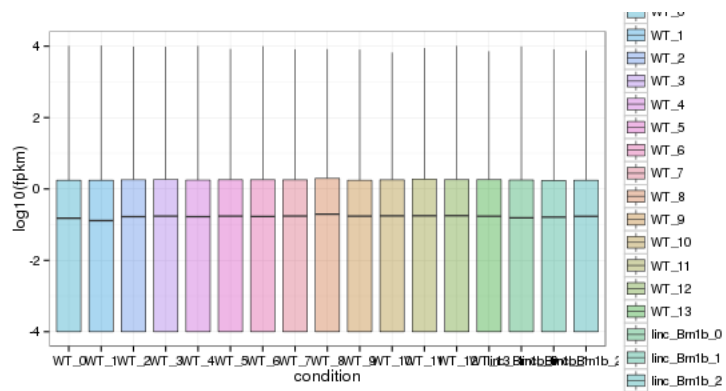

## Density

Density (genes)

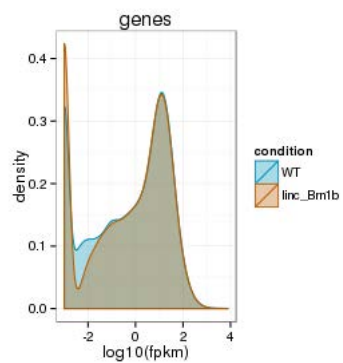

Density (genes, replicates)

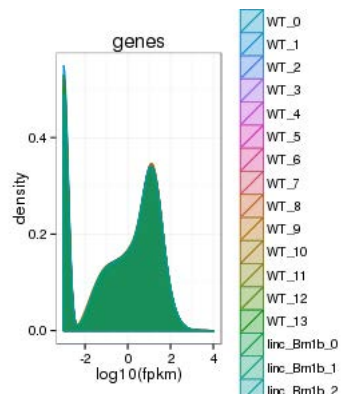



# Clustering

## Replicate Clusters

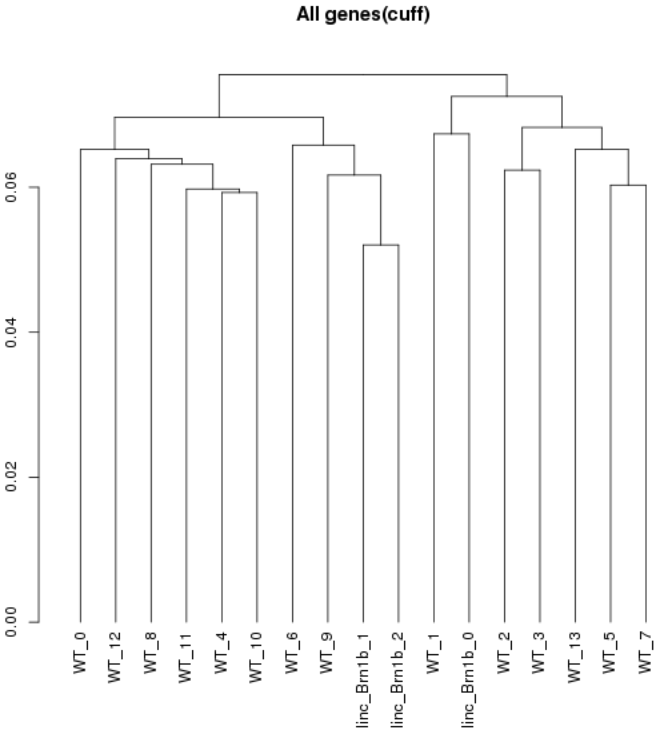

## NULL

## PCA (genes)

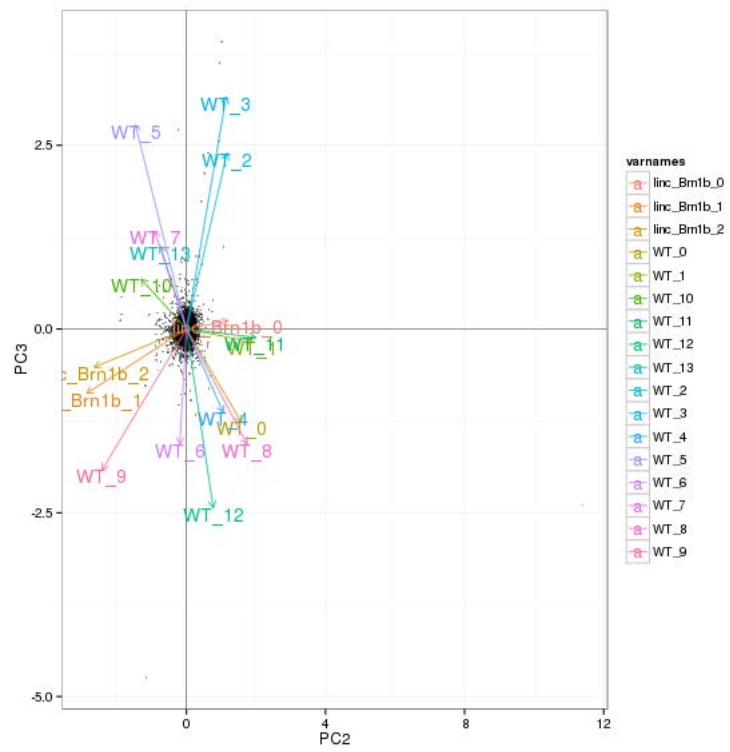

**MDS (genes)**

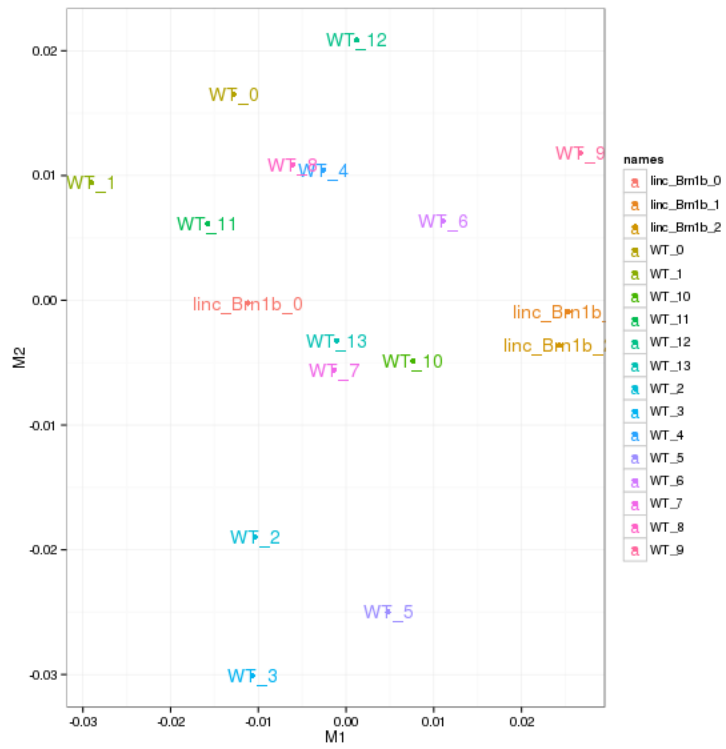

## KO assessment

Endogenous lincRNA expression

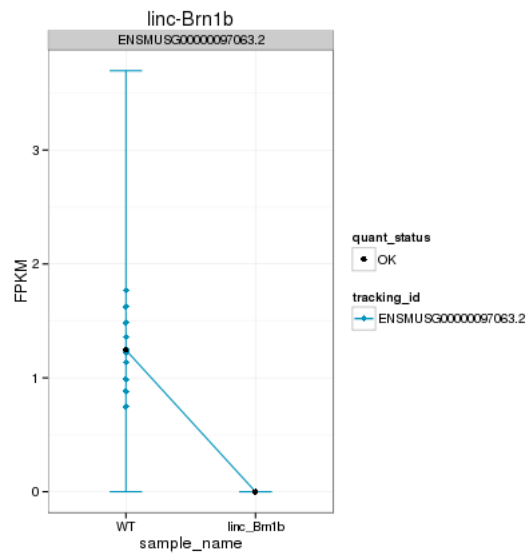

Endogenous expression of linc-Brn1b isoforms:

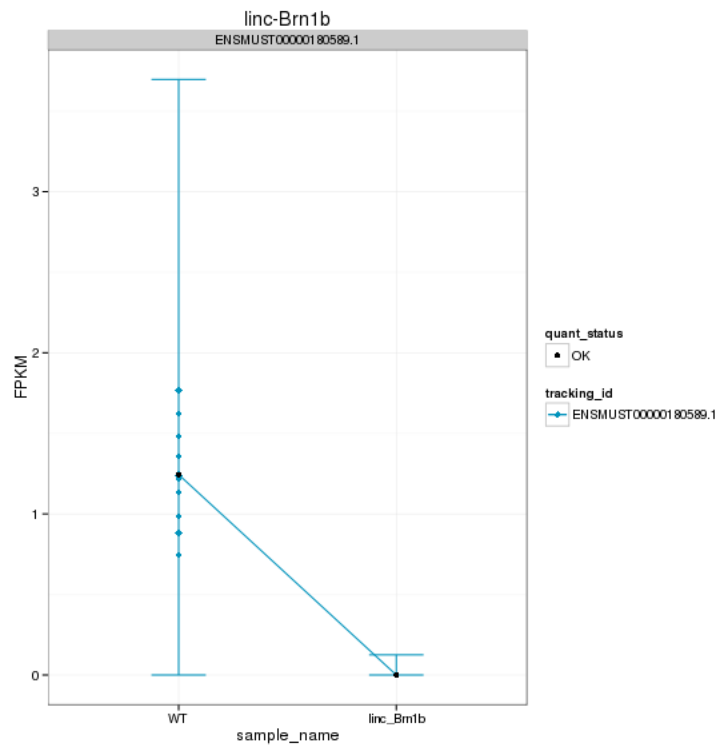

Barplot of gene expression:

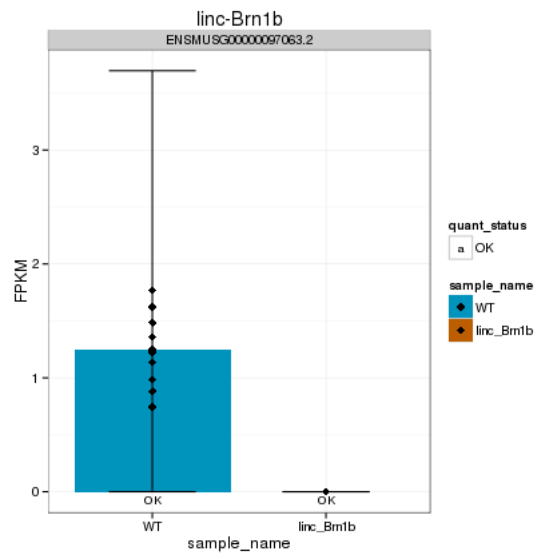

Barplot of isoform expression:

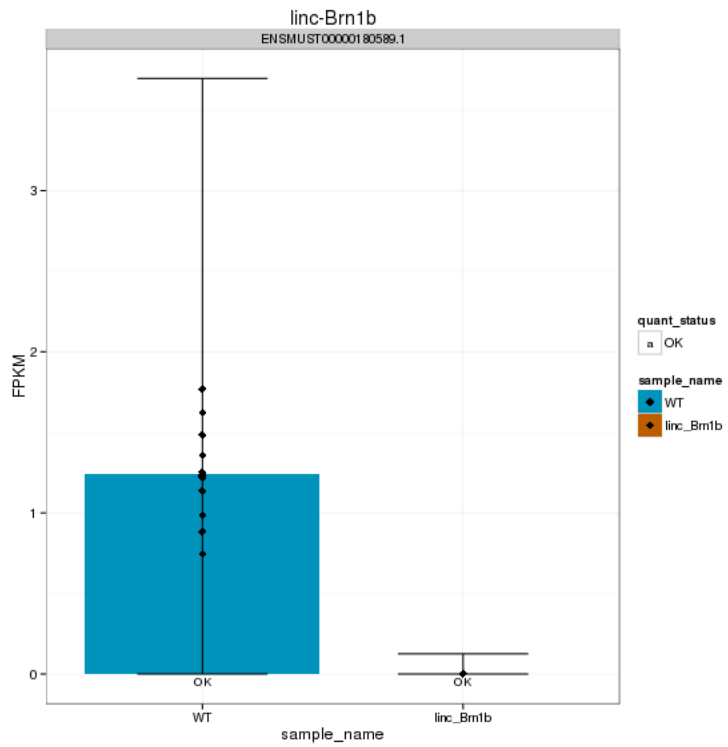

## LacZ expression

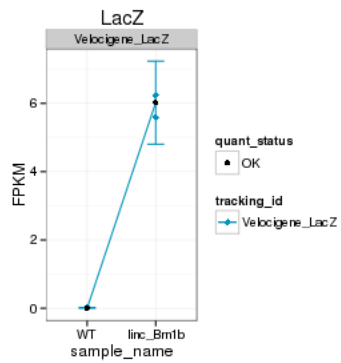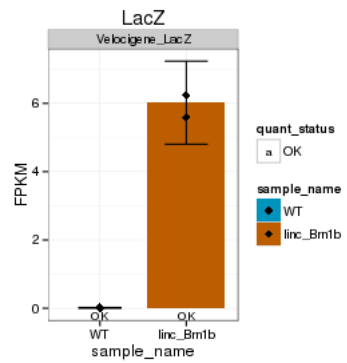

## Digital Genotyping (LacZ vs Endogenous lincRNA and Sex)

Eif2s3y is a y-expressed gene, Xist is an x-expressed gene Expression plot (endogenous linc, lacZ, Y-expressed gene):

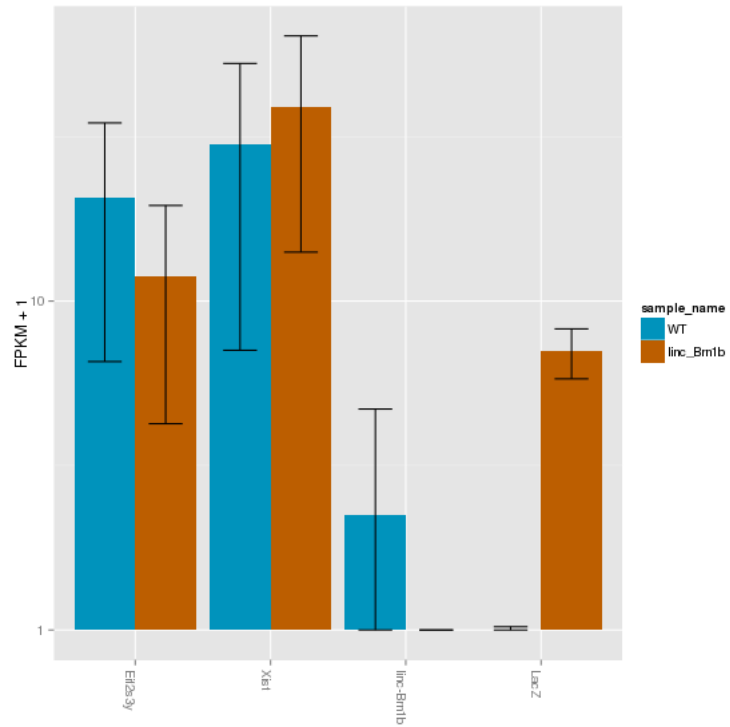

Expression heatmap:

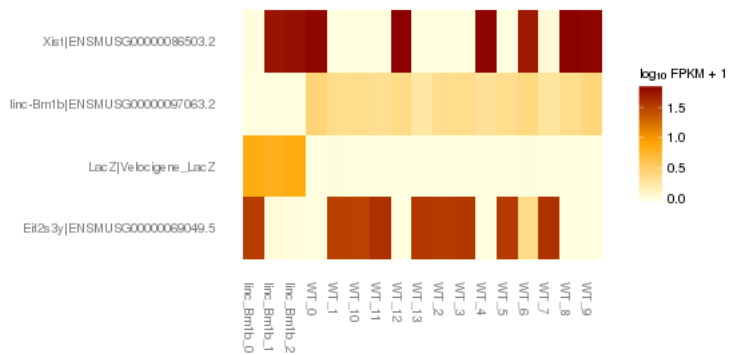

Track visualization

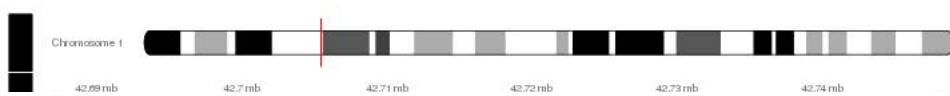



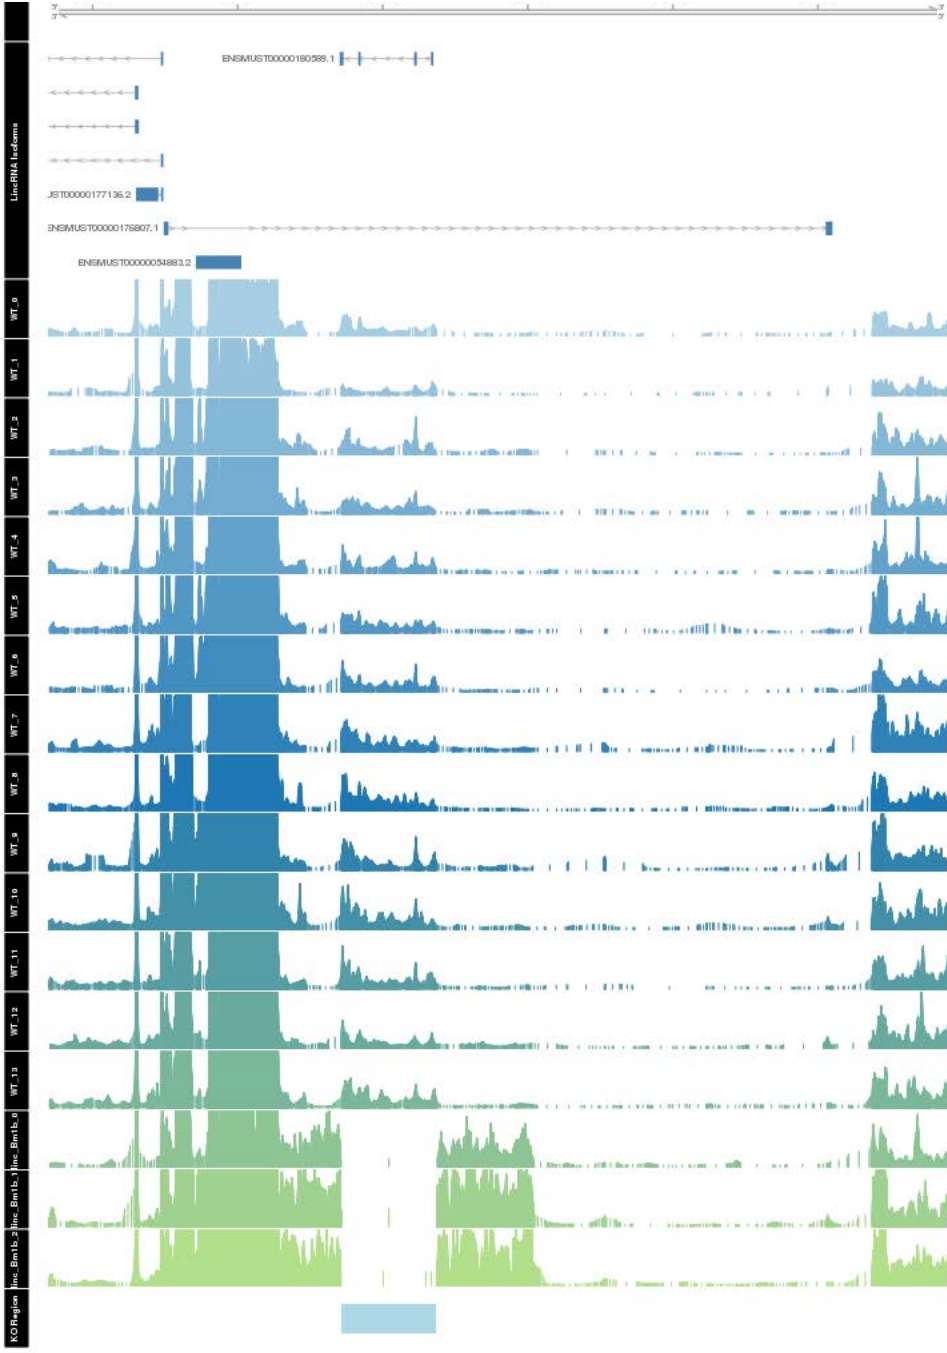

# Differential Analysis

## Differential Genes

There are 193 significantly differentially expressed genes. They are:

|    | <b>geneAnnot\$gene_short_name</b> |
|----|-----------------------------------|
| 1  | Gabra2                            |
| 2  | Sox9                              |
| 3  | Folh1                             |
| 4  | Kmt2a                             |
| 5  | Rec8                              |
| 6  | Arrdc2                            |
| 7  | Calr                              |
| 8  | Gpx6                              |
| 9  | Pde1c                             |
| 10 | Nes                               |
| 11 | Epha2                             |
| 12 | Homer1                            |
| 13 | Dio2                              |
| 14 | Hnmpa0                            |
| 15 | Ttc9b                             |
| 16 | Carhsp1                           |
| 17 | Tppp3                             |
| 18 | Etnppl                            |
| 19 | Pdk4                              |
| 20 | P4ha1                             |
| 21 | Arid5b                            |
| 22 | Sgk1                              |
| 23 | Timp3                             |
| 24 | Ddit4                             |
| 25 | Btg2                              |
| 26 | Xbp1                              |
| 27 | Pdia6                             |
| 28 | Pxdn                              |
| 29 | Nfkbia                            |
| 30 | Serpina3n                         |
| 31 | Fos                               |
| 32 | Gpr137b                           |
| 33 | Zkscan3                           |
| 34 | Esd                               |
| 35 | Dnajc3                            |
| 36 | Slc38a2                           |
| 37 | Bcl6                              |

38 Sdf2l1  
39 Cdkn1a  
40 Creld2  
41 Glo1  
42 Xdh  
43 Atp6v0c  
  
44 Dusp1  
45 Fkbp5  
46 Syt4  
47 Rps24  
48 Pdia4  
49 Slc40a1  
50 Clk1  
51 2810459M11Rik  
52 Bok  
53 Mlph  
54 Serpinb8  
55 Dbi  
56 Atf3  
57 Lcn2  
58 Hspa5  
59 Itpka  
60 Spred1  
61 F3  
62 Trp53inp1  
63 Nr4a3  
64 Slc2a1  
65 Tinagl1  
66 Errfi1  
67 Ccnl2  
68 Fosl2  
69 Uncx  
70 Klf15  
  
71 Adipor2  
72 Pglyrp1  
73 Tmem238  
74 Hddc3  
75 Polr3e  
76 Tsc22d3  
77 Plat  
78 Mt2  
79 Tdgf1  
80 Mlh1

81 Cck  
82 Trf  
83 Ugt8a  
84 Tbc1d4  
85 Egr3  
86 Tlr13  
87 Slc25a37  
88 Arhgap27  
89 Pla2g3  
90 Tiparp  
91 Prr7  
92 Nostrin  
93 Filip1  
94 Arl4d  
95 Cox8a  
96 H2-Q4  
97 Anln  
  
98 Tob1  
  
99 Avp  
100 Vstm2l  
101 Smim3  
102 Camk4  
103 Txnip  
104 Foxq1  
105 Akap12  
106 Irs2  
107 Pcsk1n  
108 Tnfsf10  
109 Zfp189  
110 Slc6a5  
111 C1qtnf4  
112 Nkx6-2  
113 Cldn5  
114 Kcnj2  
115 Maff  
116 Tuba1c  
117 Lor  
118 Nxpe4  
119 Ctla2a  
120 Snhg11  
121 Rps2  
122 Hjurp  
123 Pcdhb7

124 Cirbp  
125 Nudt18  
126 Pcdhb3  
127 Zfp36l2  
128 Npas4  
129 Clec14a  
130 Plaur  
131 Mpeg1  
132 Cdh19  
133 Gimap6  
134 Hes5  
135 Tmem252  
136 Ctxn1  
137 Ccdc6  
138 Dact2  
139 Chchd10  
140 Rasd1  
141 Rasl11b  
142 Klk6  
143 Kcnk12  
144 Plekho2  
145 Pcdhb6  
146 Hbb-bs  
147 Junb  
148 Ier2  
149 Mat2a  
150 Iigp1  
151 Tmem158  
152 5033411D12Rik  
153 Zcchc24  
  
154 Pign  
155 Kdm5d  
156 Ero1lb  
157 Mex3b  
158 C030014I23Rik  
159 Cox5b  
160 Rpl34  
161 Scoc  
162 BC048507  
163 Zbtb16  
164 Bpifb9b  
165 Bpifb3  
166 Ddx3y

167 Irgm2  
168 Gm1673  
169 Junb  
170 Egr4  
171 Gm7292  
172 Gpr27  
173 H2-BI  
174 Wdfy1  
175 Plekha7  
176 Arrdc3  
177 Fjx1  
178 Rpm1  
179 Nrarp  
180 Gbp4  
181 Gm11273  
182 Slc5a3  
183 Cdr1  
184 Apold1  
185 Hspa1b  
186 Malat1  
187 AA465934  
188 Gm21967  
189 Ccdc85b  
190 Gm6472  
191 Al848285  
192 4930480K23Rik  
193 Gpr137b-ps

## Matrix of gene significant differences between conditions

(skip for Brainmap wt-v-ko comparisons)

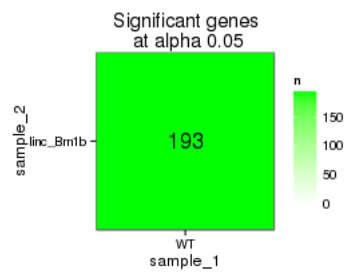

## Significant gene expression differences between conditions

Expression plot (genes):(turned off)

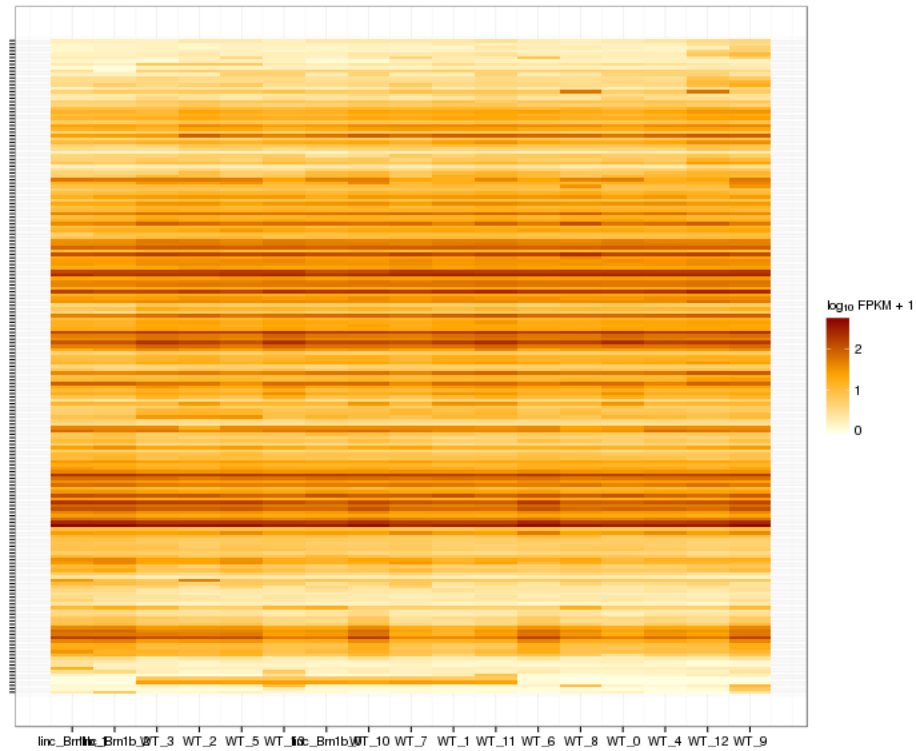

Significant genes with expression >50fpm (any condition):(turned off)

An individual look at each of the highly expressed significantly differentially regulated genes: (eval=false for first pass)

## Expression-level/significance relationship

Scatter plot of significant genes only:

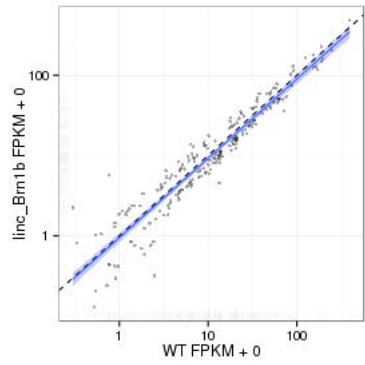

Volcano Plot

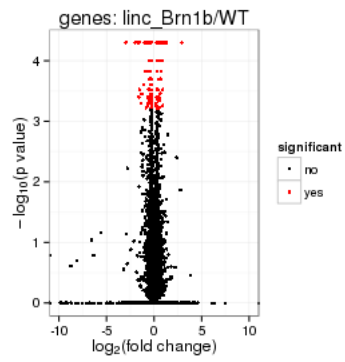

Volcano plot with significant genes only:

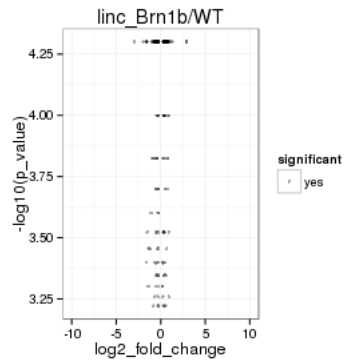

FoldChange Heatmap



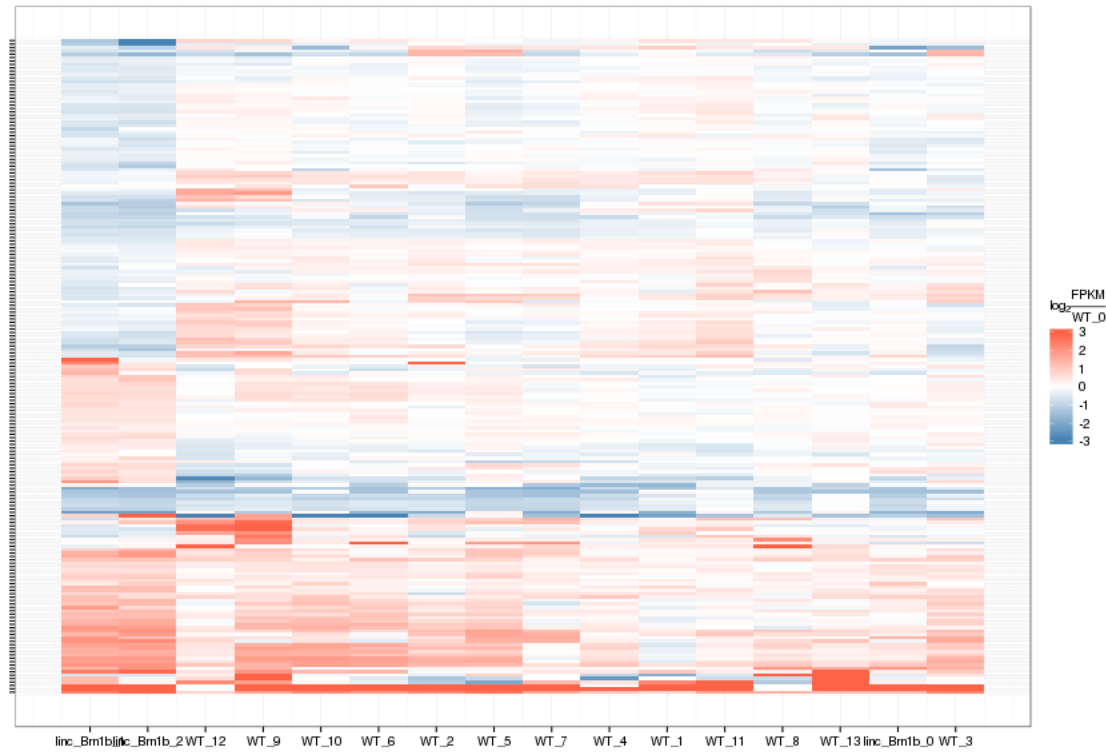

## Differential Splicing

### Differential Isoforms between conditions

Per isoform difference between conditions:

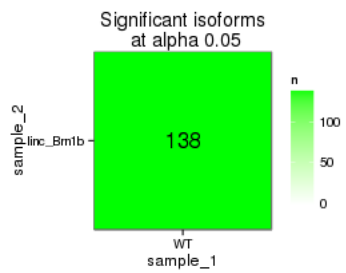

These isoforms are:

**isoAnnot\$gene\_short\_name**

- 1 Gabra2
- 2 Sox9
- 3 Rec8
- 4 Arrdc2
- 5 Calr
- 6 Hif3a
- 7 Nes
- 8 Ndrg1
- 9 Dio2
  
- 10 Ttc9b
- 11 Pdk4
- 12 Sgk1
- 13 Tmcc3
- 14 Timp3
- 15 Ddit4
- 16 Cpm
- 17 Tns3
- 18 Btg2
- 19 Xbp1
- 20 Pxdn
- 21 Nfkbia
- 22 Serpina3n
- 23 Fos
- 24 Gpr137b
- 25 Thbs4
- 26 Kat6b
- 27 Dnajc3
- 28 Slc38a2
- 29 Bcl6
- 30 Sdf2l1
- 31 Tfrc
- 32 Cdkn1a
- 33 Glo1
- 34 Xdh
- 35 Atp6v0c
- 36 Dusp1
  
- 37 Fkbp5
- 38 Rps24
- 39 Pdia4
- 40 Bok

41 Mlph  
42 Hspa5  
43 Spred1  
44 F3  
45 Slc2a1  
46 Ago3  
47 Map3k6  
48 Errfi1  
49 Ccnl2  
50 Fosl2  
51 Adipor2  
52 Pglyrp1  
53 Hddc3  
54 Tsc22d3  
55 Mt2  
56 Mlh1  
57 Cck  
58 Ugt8a  
59 Fndc3a  
60 Akr1c14  
61 Egr3  
62 Slc25a37  
63 Tiparp  
64 Prr7  
  
65 Arl4d  
66 Cox8a  
67 Anln  
68 Tob1  
69 Avp  
70 Vstm2l  
71 Acer2  
72 Smim3  
73 Camk4  
74 Slc43a2  
75 Aox4  
76 Txnip  
77 Foxq1  
78 Akap12  
79 Pcsk1n  
80 Tnfsf10  
81 Slc6a5  
82 Gjb6  
83 C1qtnf4

84 Nkx6-2  
85 Cldn5  
86 Kcnj2  
87 Ctla2a  
88 Shhg11  
89 Acp1  
90 Hjurp  
91 Pcdhb7  
92 Nudt18  
93 Zfp36l2  
94 Npas4  
95 Cdh19  
96 Hes5  
97 Dact2  
98 Chchd10  
99 Kcnk12  
100 Pcdhb6  
101 Adarb2  
102 Junb  
103 Ier2  
104 Mat2a  
105 Zfp771  
106 Tmem158  
107 5033411D12Rik  
108 Pign  
109 Kdm5d  
110 Ero1lb  
111 Mex3b  
112 Zbtb16  
113 Bpifb9b  
114 Ddx3y  
115 Ahnak  
116 Jund  
117 Egr4  
  
118 Gm7292  
119 Gpr27  
  
120 Wdfy1  
121 Plekha7  
122 Arrdc3  
123 Fjx1  
124 Rprm  
125 Nrarp  
126 Gbp4

- 127 Gm11273
- 128 Cdr1
- 129 Apold1
- 130 Hspa1b
- 131 Malat1
- 132 Ccdc85b
- 133 Gm6472
- 134 Al848285
- 135 4930480K23Rik
- 136 Gpr137b-ps

Gene-level DE isoform heatmap

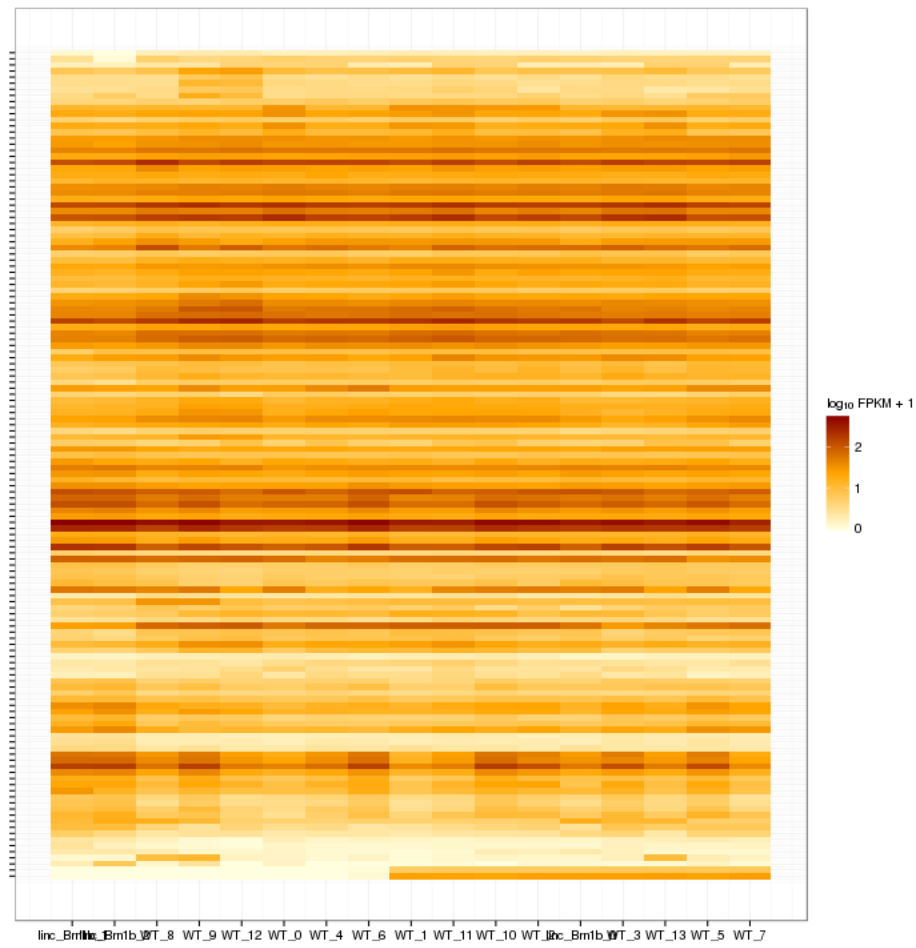

Isoform foldchange heatmap by isoform:

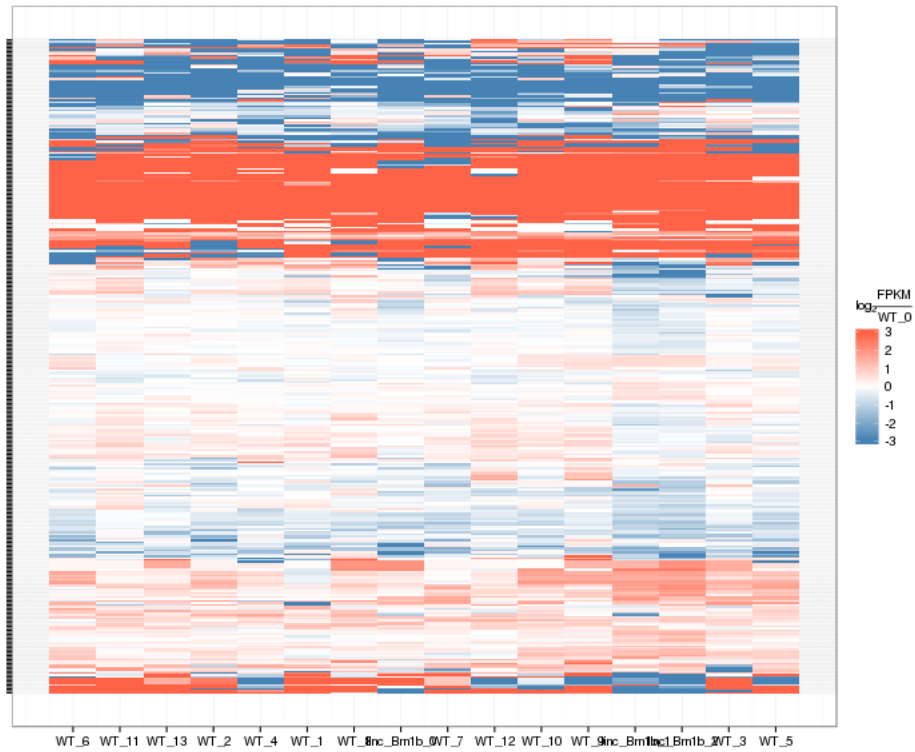

## Differential Splicing between conditions

(eval false for first pass)

Per condition differences in isoforms (Does gene have diff piechart between conditions?)

These genes are:

Splicing heatmap by isoform:

Splicing heatmap by gene

The following are significantly differentially spliced genes (relative portion of isoform per condition):

## Gene/Pathway Analysis

### GSEA

Enrichment and zscores are calculated based on expression in KO vs WT (fpkmKO/fpkmWT), so genes that are down regulated in KO are shown in blue, while upregulation is shown in red.

KO/WT Blue = down in KO Red = Up in KO

Biocarta enrichment:

```
## [1] "Not enough significant categories to print a heatmap!"
```

Biocarta zscore:

```
## [1] "Not enough significant categories to print a heatmap!"
```

Reactome enrichment:

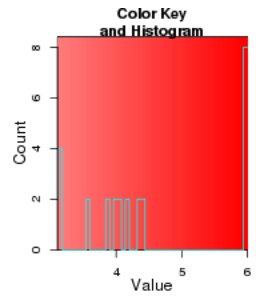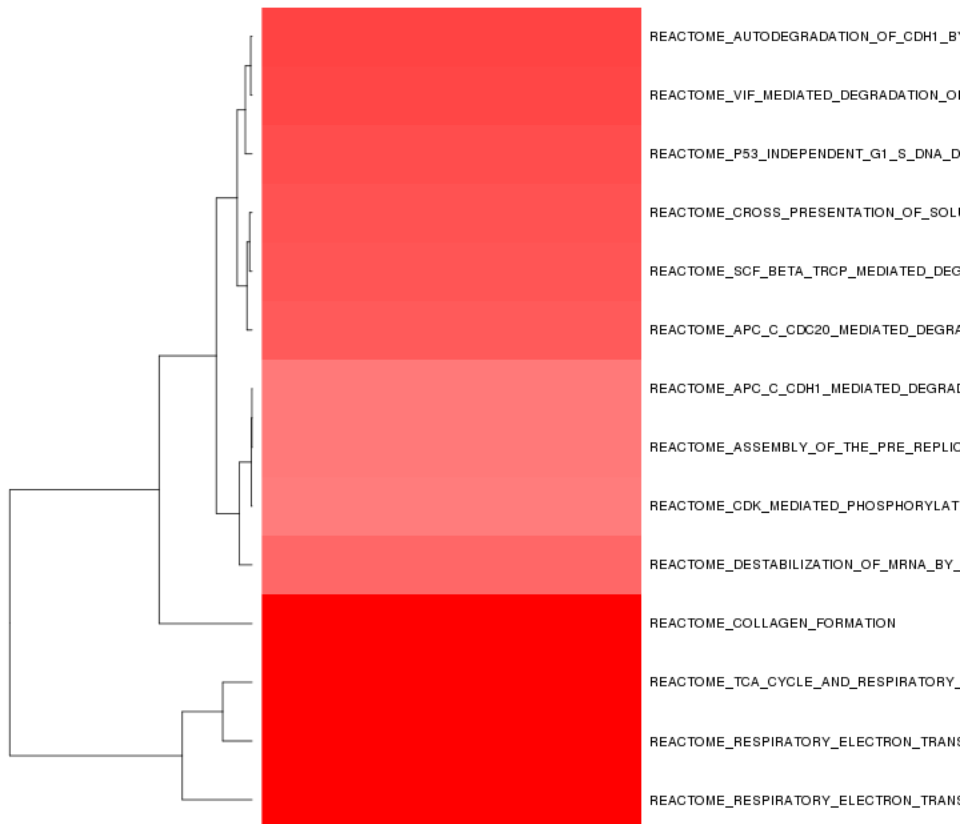

Reactome zscore:

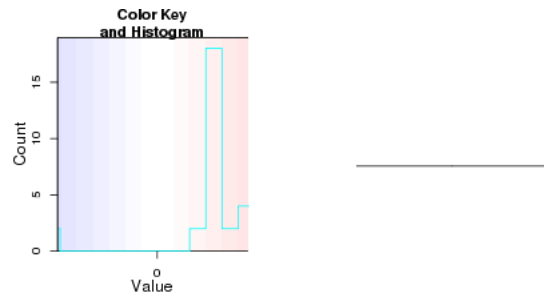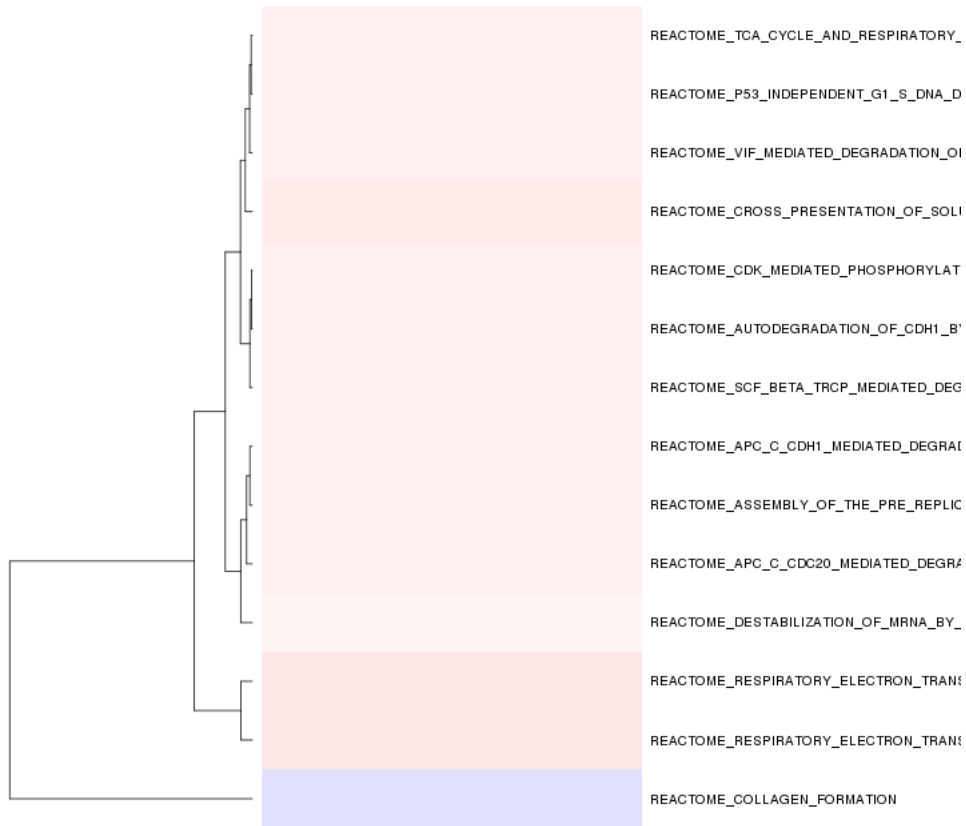

Kegg enrichment:



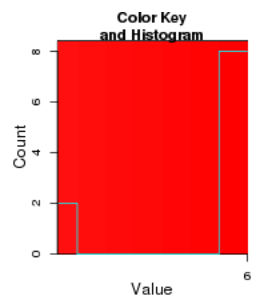

\_\_\_\_\_

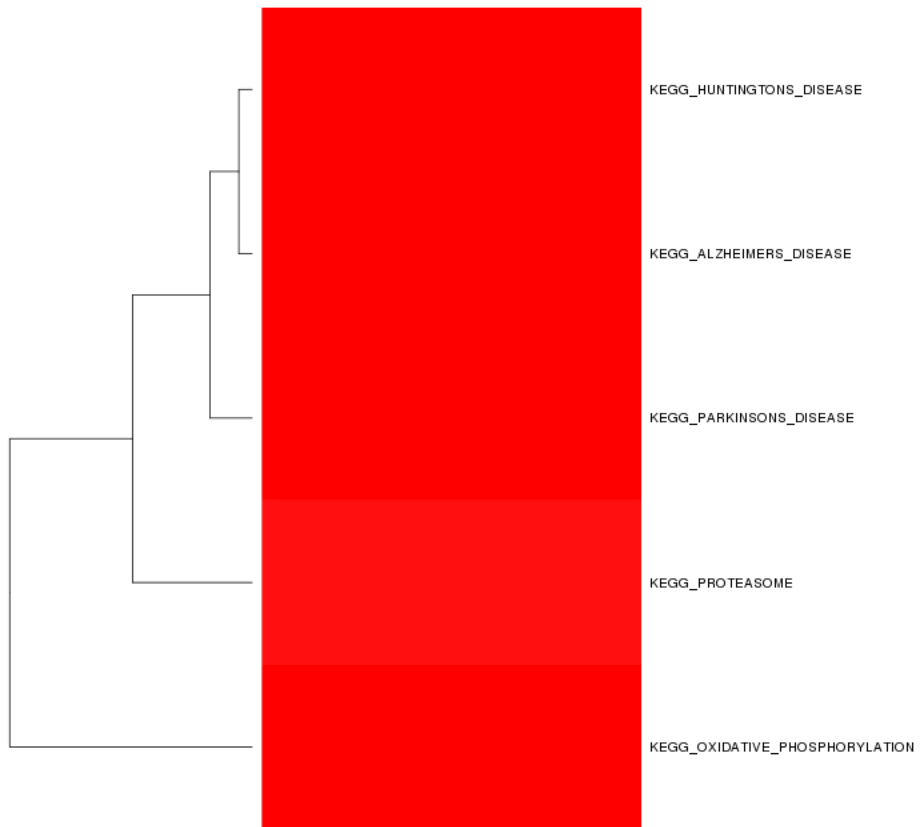

Kegg zscore:

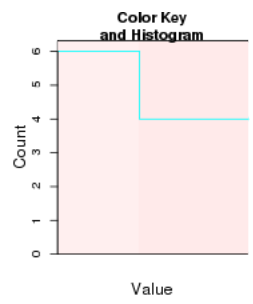

\_\_\_\_\_

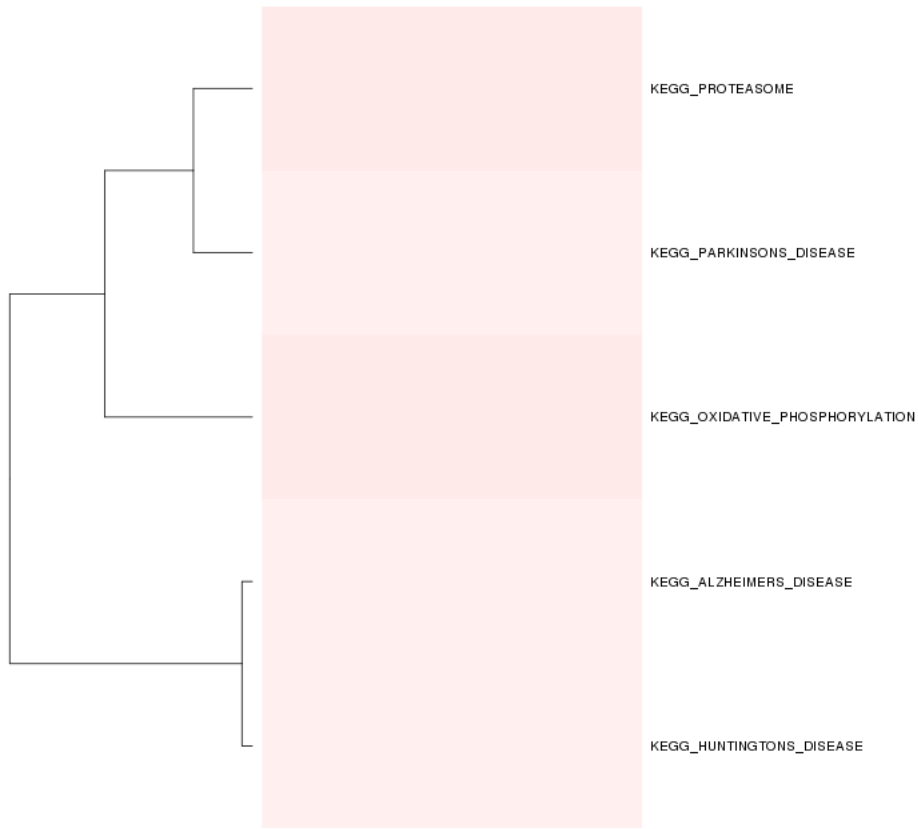

Interneuron enrichment:

## Error: no locations are finite



Lhx6\_genes

5HT\_genes

Interneuron zscore:

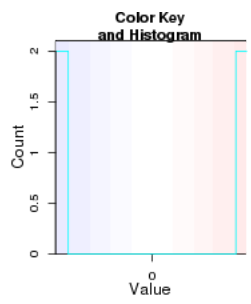

—

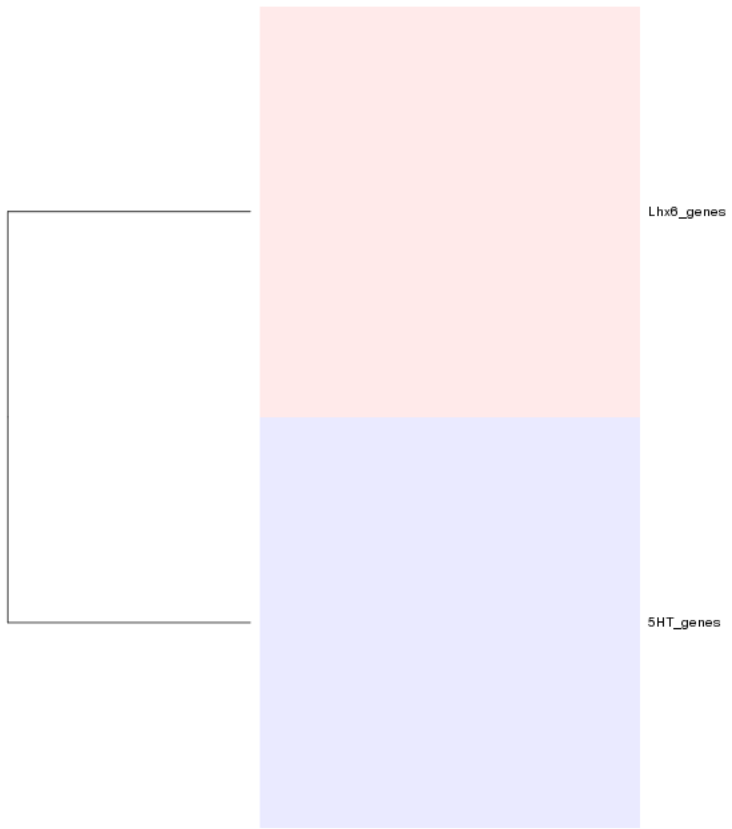

Oncogene enrichment:

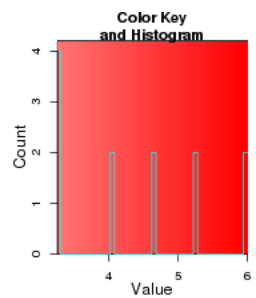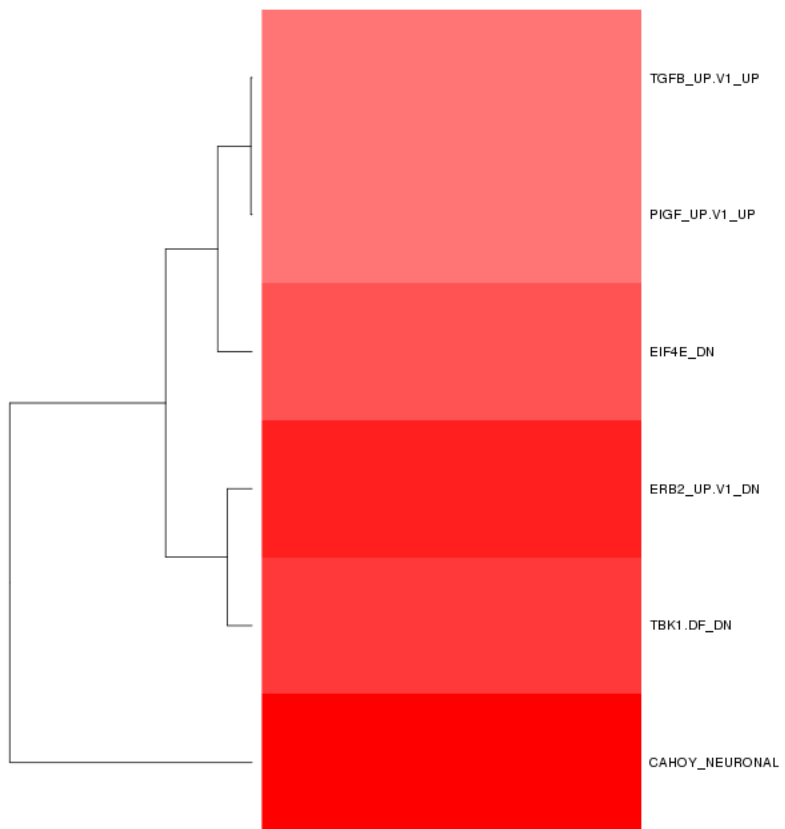

Oncogene zscore:

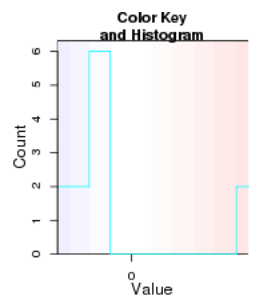

\_\_\_\_\_

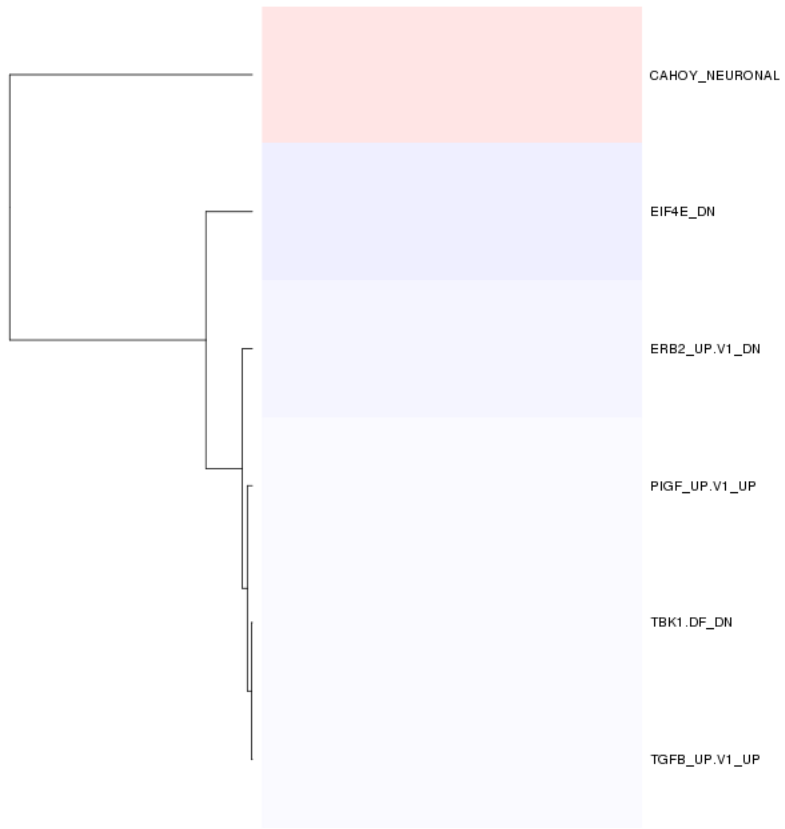

Immuno enrichment:



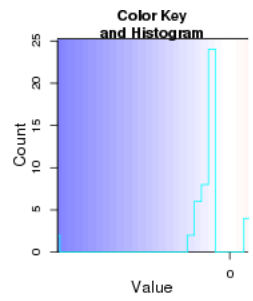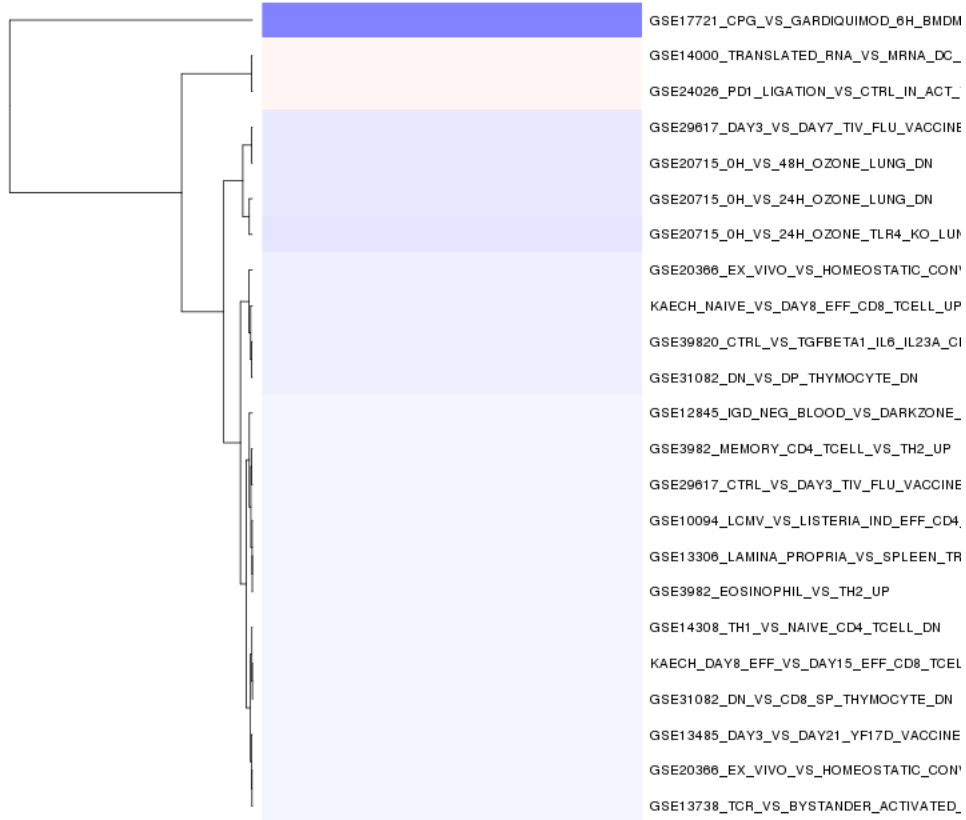

TF enrichment:



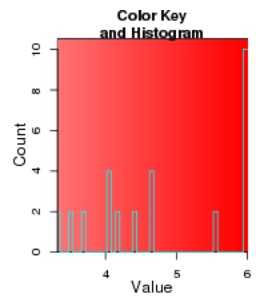

\_\_\_\_\_

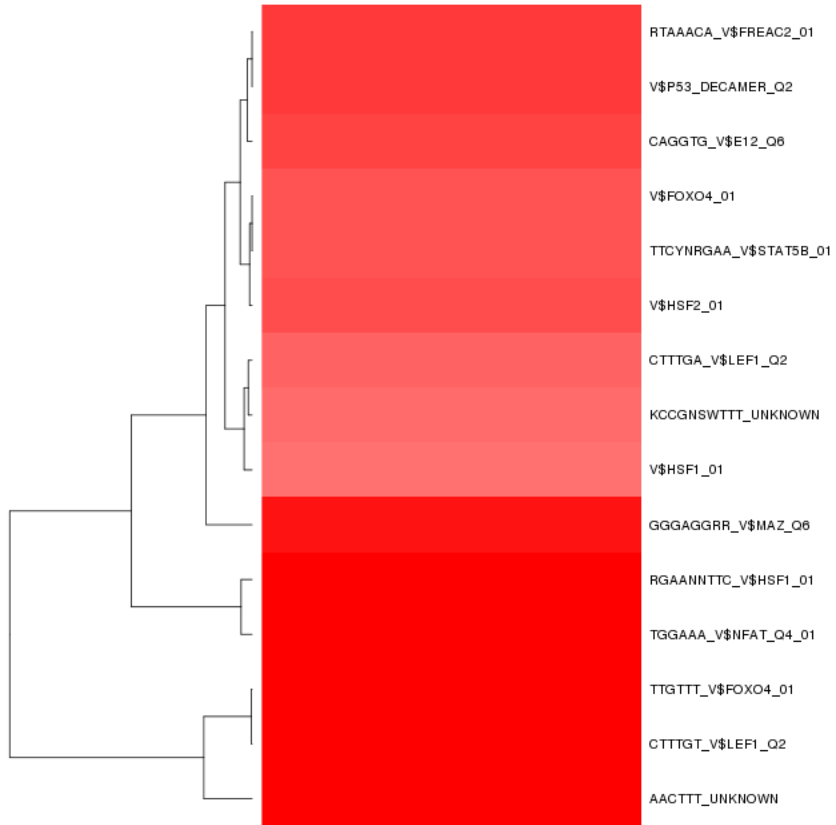

TF zscore:

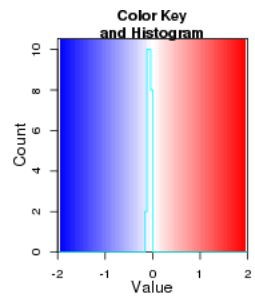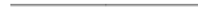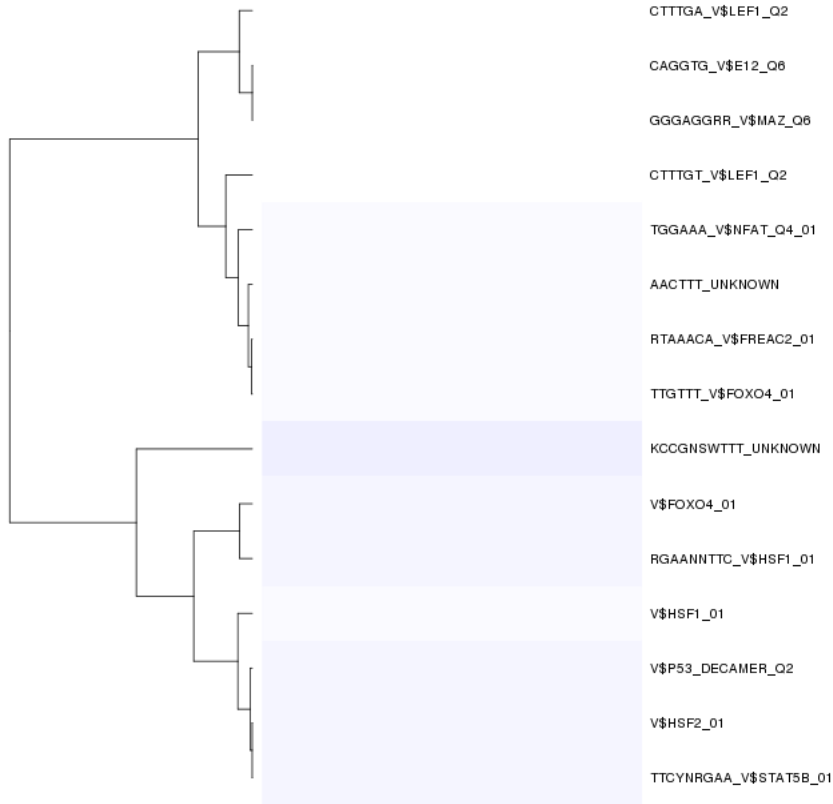

## GO enrichment

Cluster profiler used to call enrichments of significantly differentially regulated genes that map to Entrez IDs.

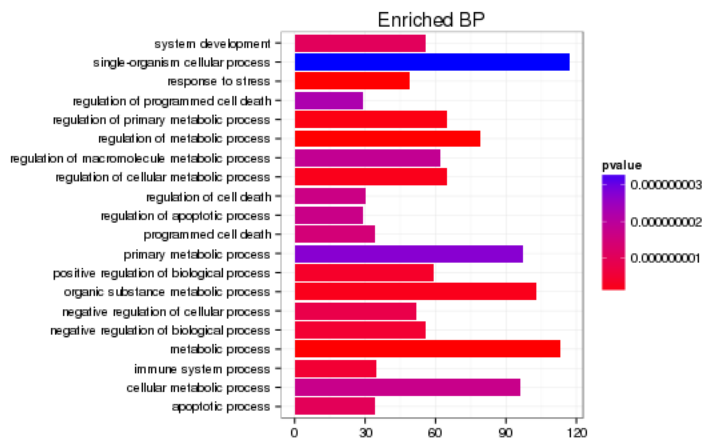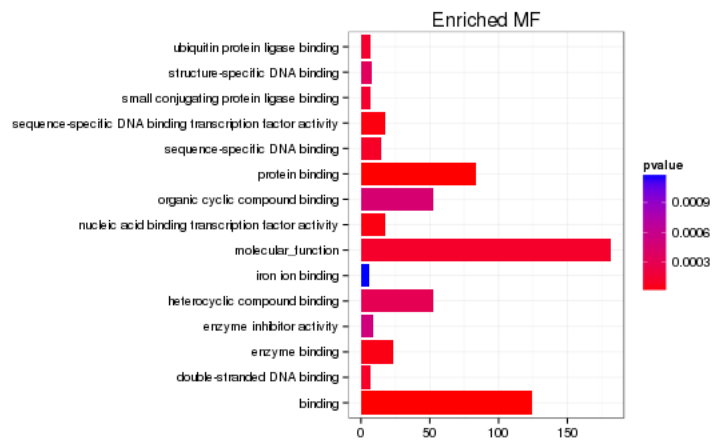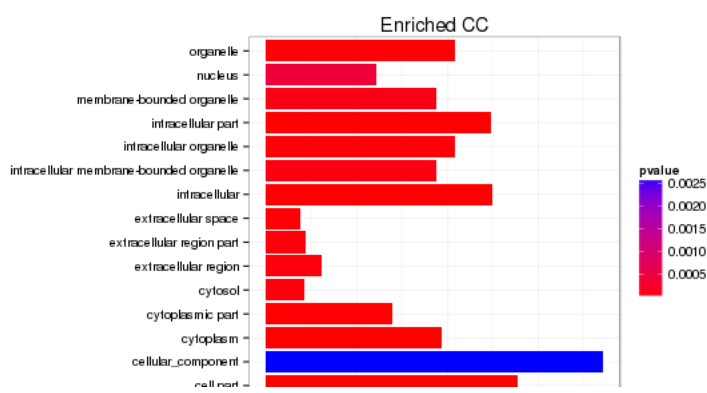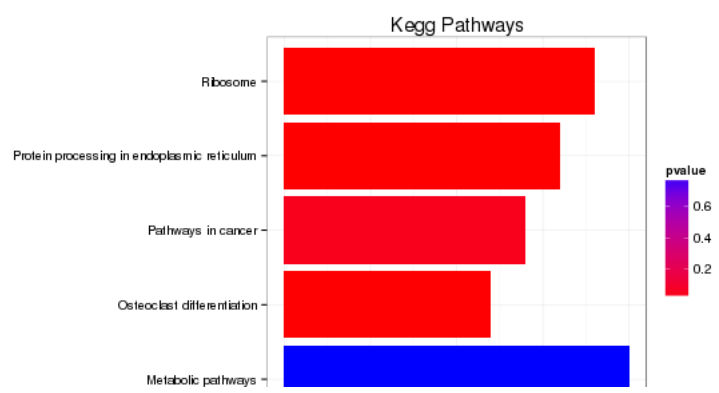

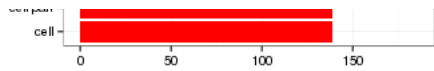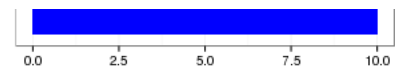

### Reactome pathway enrichment

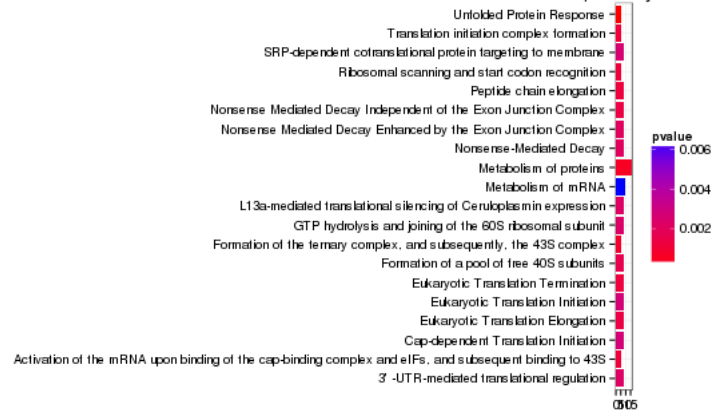

## Enrichment or depletion for stage-specific cell cycle markers

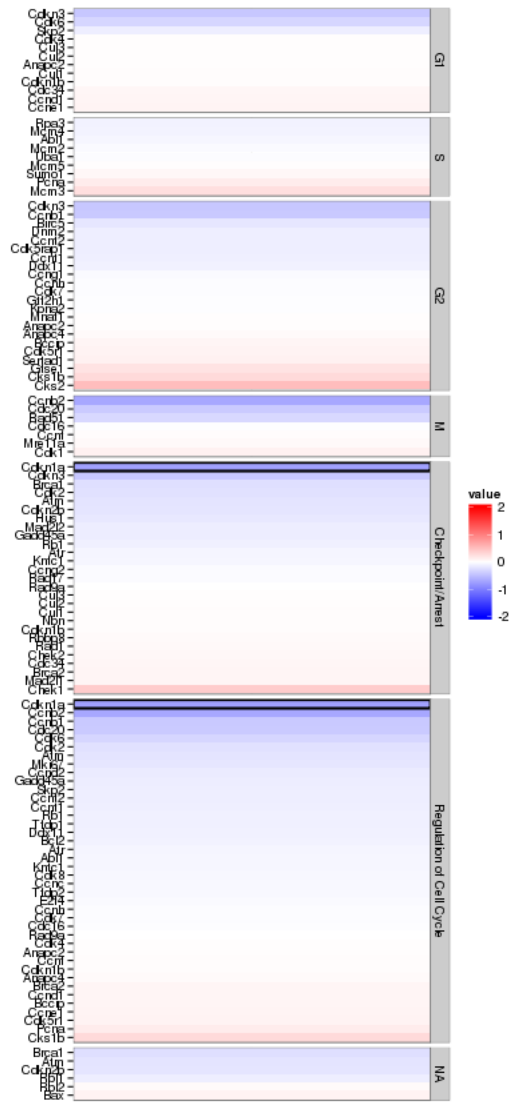

Enrichment or depletion for markers of specific cortical layers

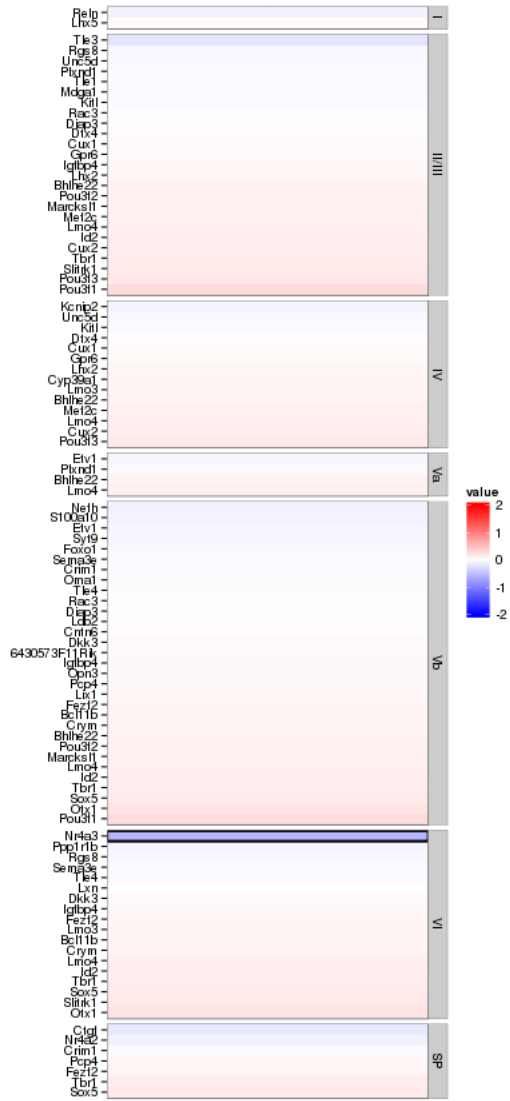

Enrichment or depletion for specific neural cell types

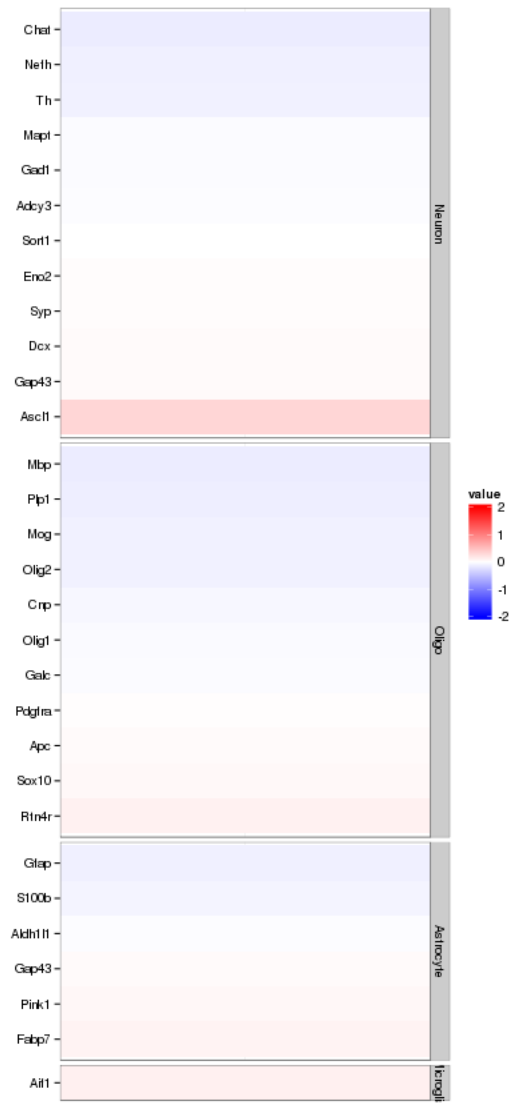

**Enrichment or Depletion of neural differentiation markers**

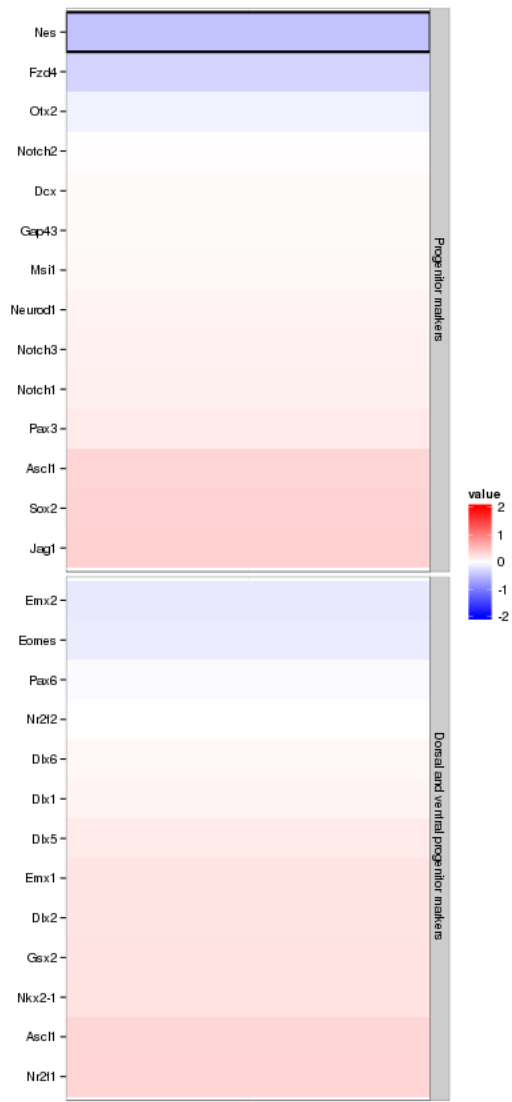

## Cis vs Trans (locally)

$\log_2$  Foldchange and test statistic are calculated with the ratio of  $\text{fpm(KO)}/\text{fpm(WT)}$ , thus the test\_stat is positive if a gene is higher in the KO and negative if a gene has lower expression in the KO

The pvalue for 0 genes significantly regulated in a region this size is: 1



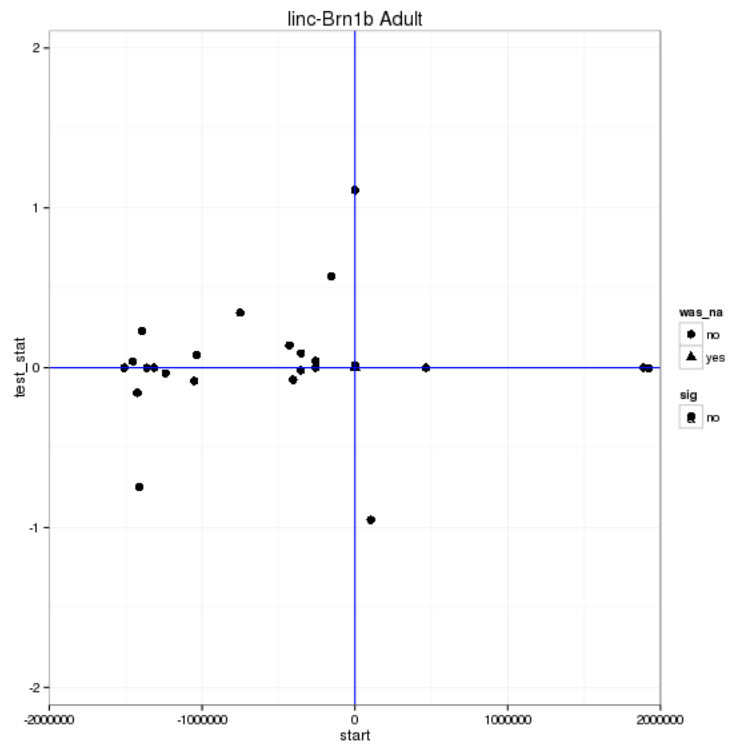

## Notes

Samples used are:

10

- 1 JR729
- 2 JR728
- 3 JR796
- 4 JR797
- 5 JR740
- 6 JR800
- 7 JR827
- 8 JR778
- 9 JR734
- 10 JR802
- 11 JR803
- 12 JR735
- 13 JR785
- 14 JR781

15 JR731  
16 JR835  
17 JR836

## Replicates

| file                                                                          | sample_name | replicate | rep_name    | total_mass  | norm_mass   | internal_scale | external_scale |
|-------------------------------------------------------------------------------|-------------|-----------|-------------|-------------|-------------|----------------|----------------|
| 1 /n/rinn_data1/seq/fgoff/Projects/BrainMap/data/quants/JR729/abundances.cxb  | WT          | 0         | WT_0        | 26334400.00 | 34504400.00 | 0.76           | 1.00           |
| 2 /n/rinn_data1/seq/fgoff/Projects/BrainMap/data/quants/JR728/abundances.cxb  | WT          | 1         | WT_1        | 20329200.00 | 34504400.00 | 0.59           | 1.00           |
| 3 /n/rinn_data1/seq/fgoff/Projects/BrainMap/data/quants/JR796/abundances.cxb  | WT          | 2         | WT_2        | 34089000.00 | 34504400.00 | 0.98           | 1.00           |
| 4 /n/rinn_data1/seq/fgoff/Projects/BrainMap/data/quants/JR797/abundances.cxb  | WT          | 3         | WT_3        | 28103300.00 | 34504400.00 | 0.80           | 1.00           |
| 5 /n/rinn_data1/seq/fgoff/Projects/BrainMap/data/quants/JR740/abundances.cxb  | WT          | 4         | WT_4        | 35808200.00 | 34504400.00 | 1.04           | 1.00           |
| 6 /n/rinn_data1/seq/fgoff/Projects/BrainMap/data/quants/JR800/abundances.cxb  | WT          | 5         | WT_5        | 37012200.00 | 34504400.00 | 1.07           | 1.00           |
| 7 /n/rinn_data1/seq/fgoff/Projects/BrainMap/data/quants/JR827/abundances.cxb  | WT          | 6         | WT_6        | 27786600.00 | 34504400.00 | 0.81           | 1.00           |
| 8 /n/rinn_data1/seq/fgoff/Projects/BrainMap/data/quants/JR778/abundances.cxb  | WT          | 7         | WT_7        | 39541900.00 | 34504400.00 | 1.16           | 1.00           |
| 9 /n/rinn_data1/seq/fgoff/Projects/BrainMap/data/quants/JR734/abundances.cxb  | WT          | 8         | WT_8        | 34480600.00 | 34504400.00 | 1.01           | 1.00           |
| 10 /n/rinn_data1/seq/fgoff/Projects/BrainMap/data/quants/JR802/abundances.cxb | WT          | 9         | WT_9        | 45467400.00 | 34504400.00 | 1.30           | 1.00           |
| 11 /n/rinn_data1/seq/fgoff/Projects/BrainMap/data/quants/JR803/abundances.cxb | WT          | 10        | WT_10       | 52130400.00 | 34504400.00 | 1.51           | 1.00           |
| 12 /n/rinn_data1/seq/fgoff/Projects/BrainMap/data/quants/JR735/abundances.cxb | WT          | 11        | WT_11       | 34994400.00 | 34504400.00 | 1.02           | 1.00           |
| 13 /n/rinn_data1/seq/fgoff/Projects/BrainMap/data/quants/JR785/abundances.cxb | WT          | 12        | WT_12       | 34173600.00 | 34504400.00 | 0.98           | 1.00           |
| 14 /n/rinn_data1/seq/fgoff/Projects/BrainMap/data/quants/JR781/abundances.cxb | WT          | 13        | WT_13       | 41538900.00 | 34504400.00 | 1.21           | 1.00           |
| 15 /n/rinn_data1/seq/fgoff/Projects/BrainMap/data/quants/JR731/abundances.cxb | linc_Bm1b   | 0         | linc_Bm1b_0 | 24288100.00 | 34504400.00 | 0.70           | 1.00           |
| 16 /n/rinn_data1/seq/fgoff/Projects/BrainMap/data/quants/JR835/abundances.cxb | linc_Bm1b   | 1         | linc_Bm1b_1 | 44561200.00 | 34504400.00 | 1.30           | 1.00           |
| 17 /n/rinn_data1/seq/fgoff/Projects/BrainMap/data/quants/JR836/abundances.cxb | linc_Bm1b   | 2         | linc_Bm1b_2 | 43675800.00 | 34504400.00 | 1.27           | 1.00           |

## Session Info

```
## R version 3.0.2 (2013-09-25)
## Platform: x86_64-unknown-linux-gnu (64-bit)
##
## locale:
## [1] LC_CTYPE=en_US.UTF-8      LC_NUMERIC=C
## [3] LC_TIME=en_US.UTF-8      LC_COLLATE=en_US.UTF-8
## [5] LC_MONETARY=en_US.UTF-8  LC_MESSAGES=en_US.UTF-8
## [7] LC_PAPER=en_US.UTF-8     LC_NAME=C
## [9] LC_ADDRESS=C             LC_TELEPHONE=C
## [11] LC_MEASUREMENT=en_US.UTF-8 LC_IDENTIFICATION=C
##
## attached base packages:
## [1] grid      parallel  methods  stats    graphics  grDevices  utils
## [8] datasets  base
##
## other attached packages:
## [1] plyr_1.8.1
## [2] stringr_0.6.2
## [3] seqbias_1.10.0
```

```

## [4] BSgenome.Mmusculus.UCSC.mm10_1.3.19
## [5] BSgenome_1.30.0
## [6] Biostrings_2.30.1
## [7] gdata_2.13.3
## [8] GO.db_2.10.1
## [9] org.Mm.eg.db_2.10.1
## [10] clusterProfiler_1.13.1
## [11] DOSE_2.0.0
## [12] ReactomePA_1.6.1
## [13] AnnotationDbi_1.24.0
## [14] Biobase_2.22.0
## [15] mgcv_1.7-29
## [16] nlme_3.1-117
## [17] RMySQL_0.9-3
## [18] RColorBrewer_1.0-5
## [19] gridExtra_0.9.1
## [20] gtable_0.1.2
## [21] marray_1.40.0
## [22] gplots_2.13.0
## [23] GSA_1.03
## [24] limma_3.18.13
## [25] xtable_1.7-3
## [26] cummeRbund_2.7.2
## [27] Gviz_1.6.0
## [28] rtracklayer_1.22.7
## [29] GenomicRanges_1.14.4
## [30] XVector_0.2.0
## [31] IRanges_1.20.7
## [32] fastcluster_1.1.13
## [33] reshape2_1.4
## [34] ggplot2_1.0.0
## [35] RSQLite_0.11.4
## [36] DBI_0.2-7
## [37] BiocGenerics_0.8.0
## [38] knitr_1.6
##
## loaded via a namespace (and not attached):
## [1] biomaRt_2.18.0      biovizBase_1.10.8   bitops_1.0-6
## [4] caTools_1.17        cluster_1.15.2      colorspace_1.2-4
## [7] dichromat_2.0-0     digest_0.6.4        DO.db_2.7
## [10] evaluate_0.5.5      formatR_0.10        Formula_1.1-1
## [13] GenomicFeatures_1.14.5 GOSemSim_1.20.3     graph_1.40.1
## [16] graphite_1.8.1      gtools_3.4.1        Hmisc_3.14-4
## [19] igraph_0.7.1        KEGG.db_2.10.1     KernSmooth_2.23-12
## [22] labeling_0.2        lattice_0.20-29     latticeExtra_0.6-26
## [25] MASS_7.3-33         Matrix_1.1-3        munsell_0.4.2
## [28] org.Hs.eg.db_2.10.1 proto_0.3-10        qvalue_1.36.0
## [31] Rcpp_0.11.2         RCurl_1.95-4.1     reactome.db_1.46.1
## [34] Rsamtools_1.14.3    scales_0.2.4        splines_3.0.2
## [37] stats4_3.0.2        survival_2.37-7     tcltk_3.0.2
## [40] tools_3.0.2         XML_3.98-1.1       zlibbioc_1.8.0

```

## Run Info

```
##          param
## 1      cmd_line
## 2          version
## 3  SVN_revision
## 4  boost_version
## 5          genome
##
## 1 cuffdiff -p 10 -L WT,linc-Brn1b -o /n/rinn_data1/seq/lgoff/Projects/BrainMap/data/diffs/linc-Brn1b_vs_WT_Adult /n/rinn_data1/seq/lgoff/Projects/BrainV
## 2
## 3
## 4
## 5
```

# linc-Brn1b KO vs WT (Embryonic)

This file shows the wt-v-ko comparison for linc-Brn1b.

Cuff overview:

```
## CuffSet instance with:  
## 2 samples  
## 26754 genes  
## 77524 isoforms  
## 0 TSS  
## 23066 CDS  
## 0 promoters  
## 0 splicing  
## 19954 relCDS
```

## QC

### Dispersion

Dispersion plot for genes in cuff: (Overdispersion can lead to innacurate quants)

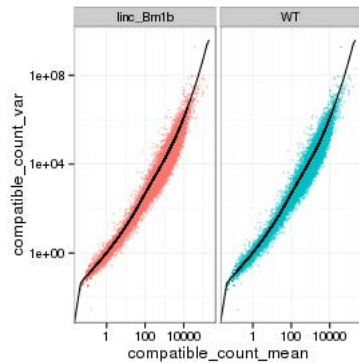

### Cross-replicate variability (fpkmSCVplot)

Differences in CV 2 can result in lower numbers of differentially expressed genes due to a higher degree of variability between replicate fpkm estimates.

Genes:

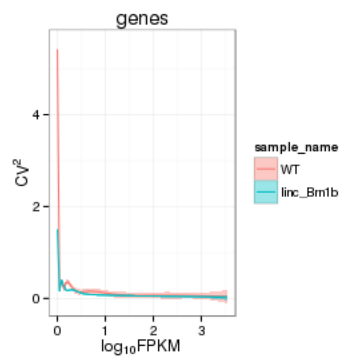

Isoforms:

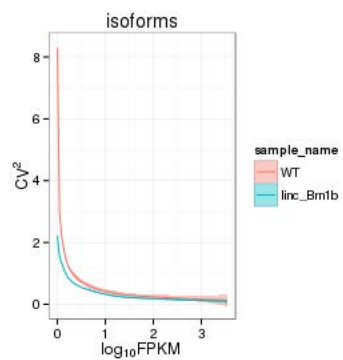

MvA plot

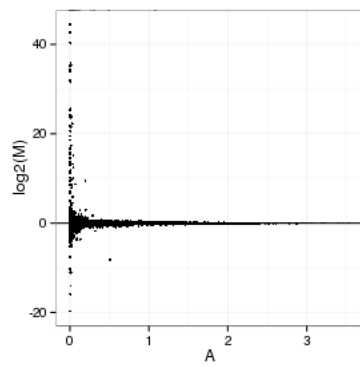

MvA plot counts

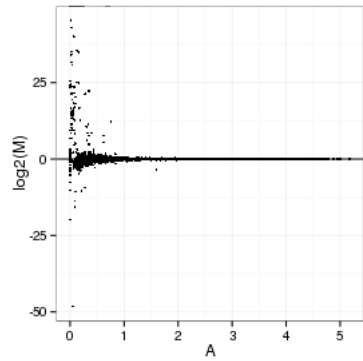

## Scatterplot matrix

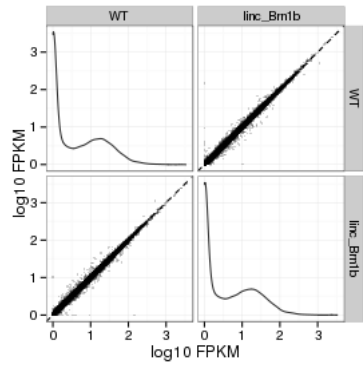

## Distributions

### Boxplots

Boxplot (genes)

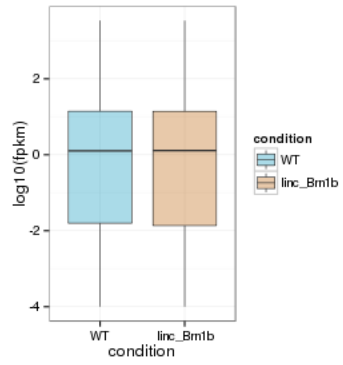

Boxplot (genes, replicates)

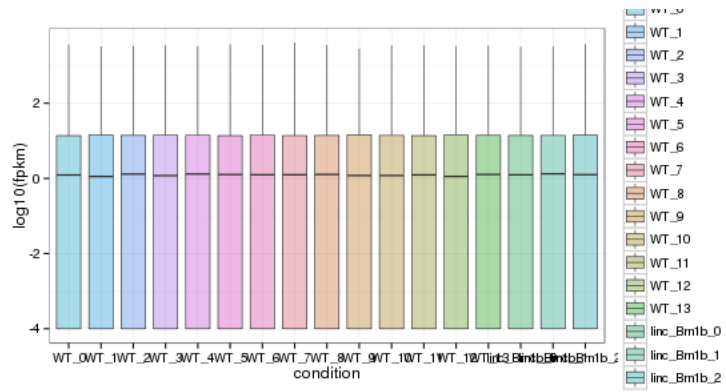

Boxplot (isoforms)

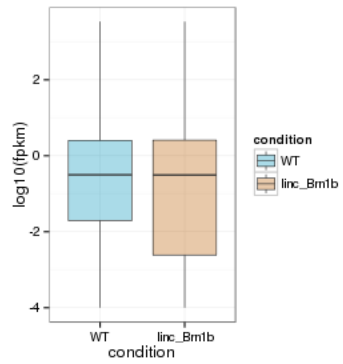

Boxplot (isoforms, replicates)



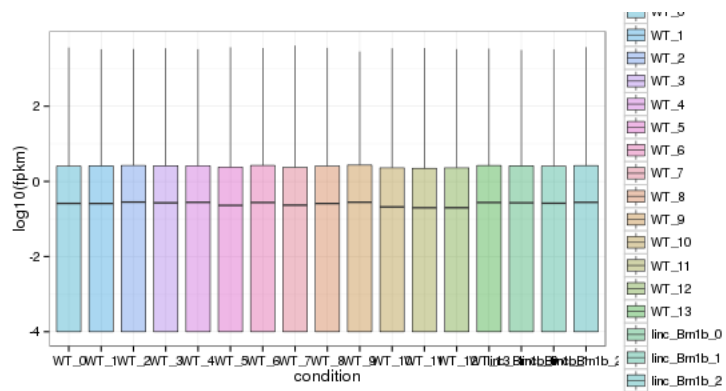

## Density

Density (genes)

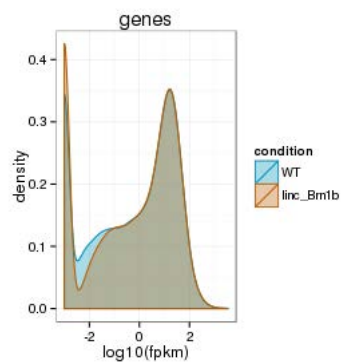

Density (genes, replicates)

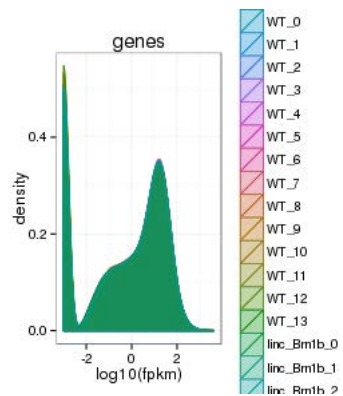

# Clustering

## Replicate Clusters

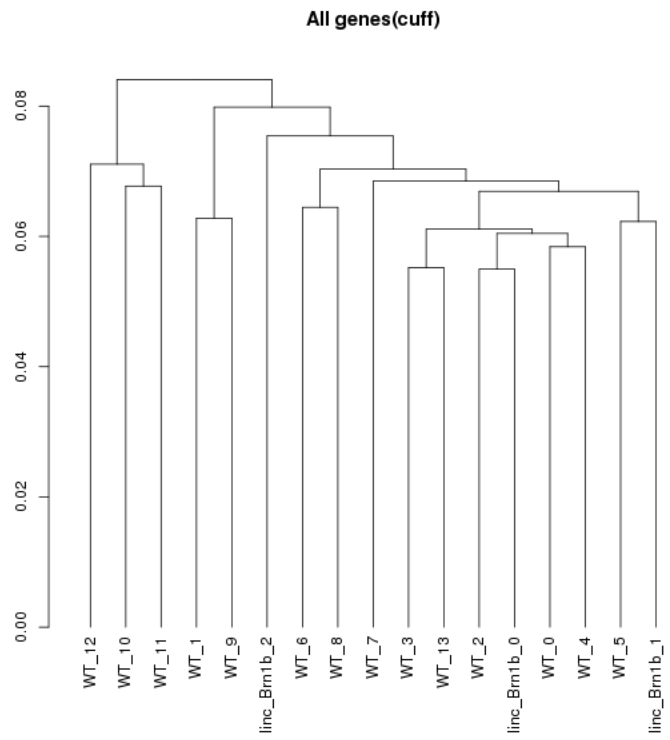

## NULL

## PCA (genes)

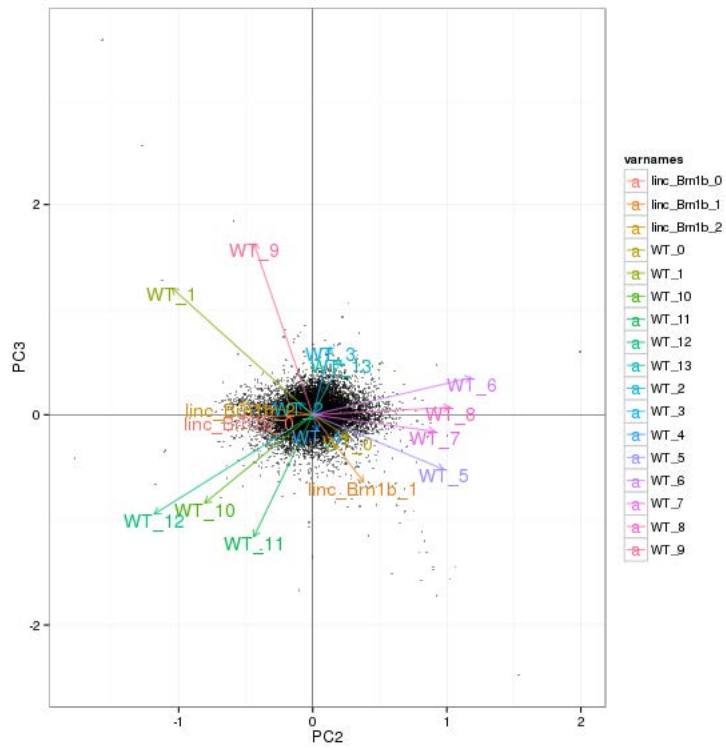

**MDS (genes)**

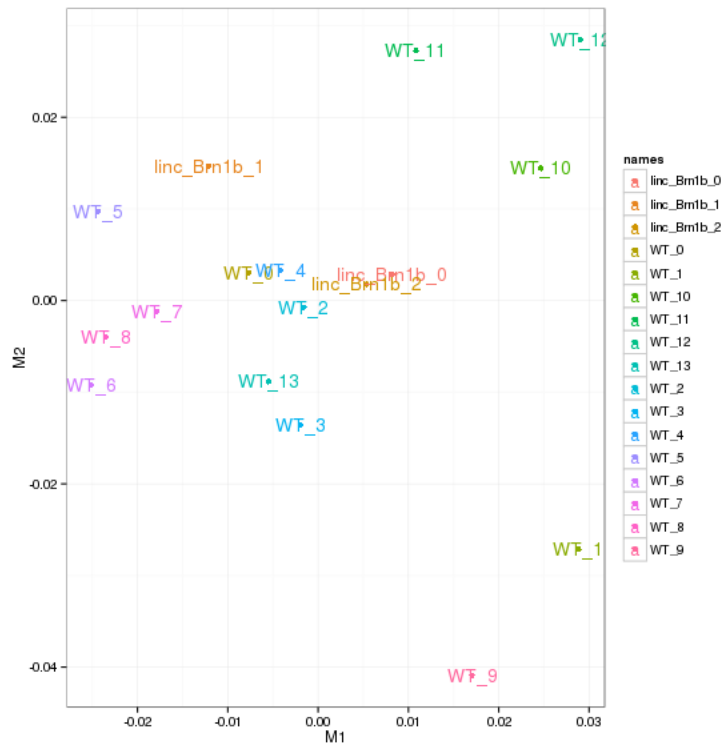

## KO assessment

Endogenous lincRNA expression

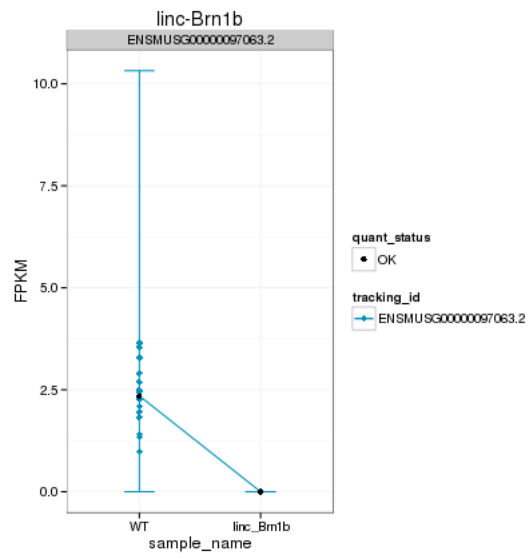

Endogenous expression of linc-Brn1b isoforms:

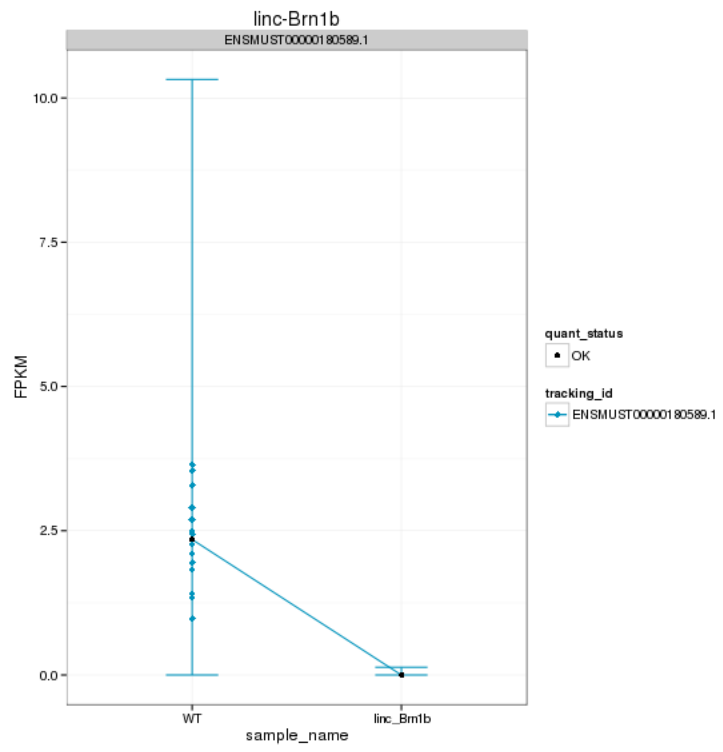

Barplot of gene expression:

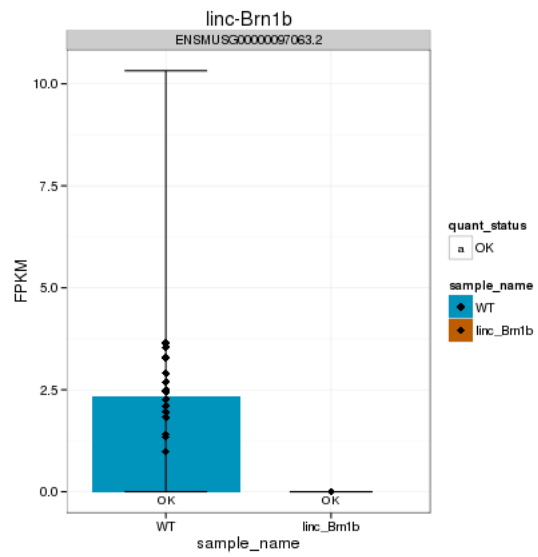

Barplot of isoform expression:

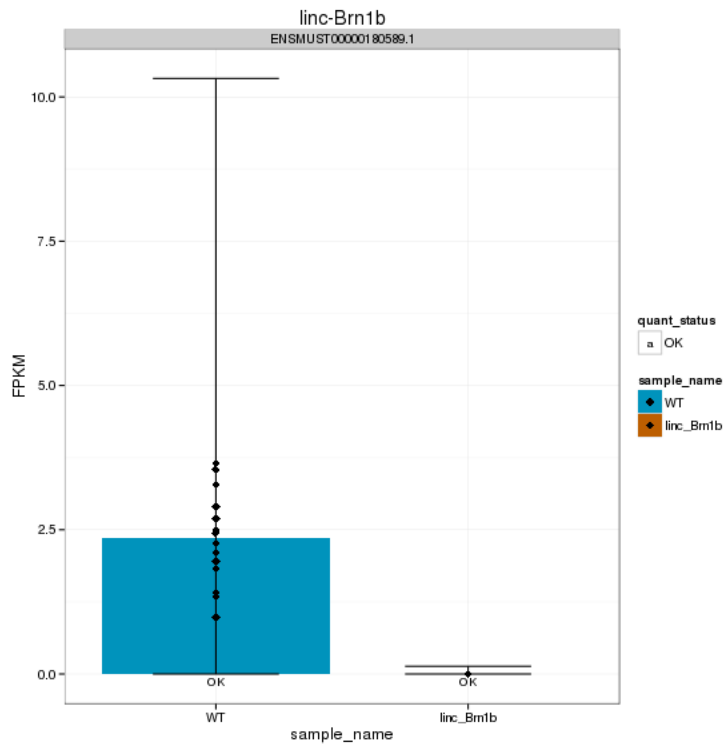

## LacZ expression

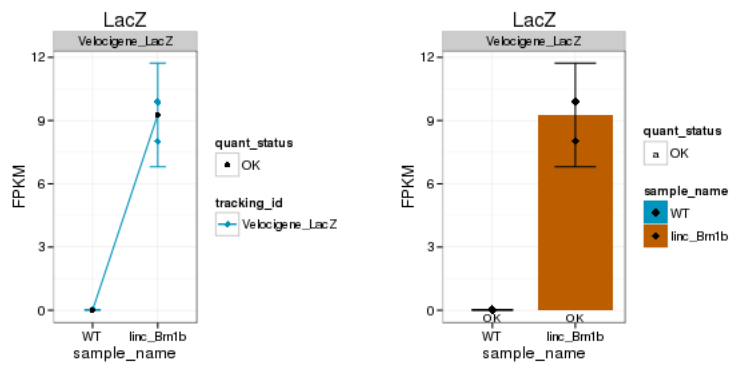

## Digital Genotyping (LacZ vs Endogenous lincRNA and Sex)

Eif2s3y is a y-expressed gene, Xist is an x-expressed gene Expression plot (endogenous linc, lacZ, Y-expressed gene):



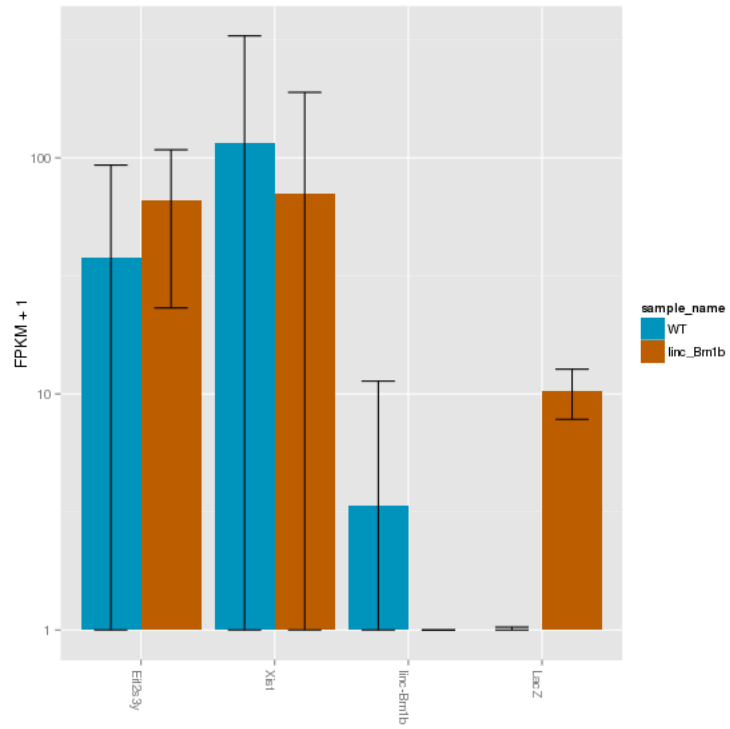

Expression heatmap:

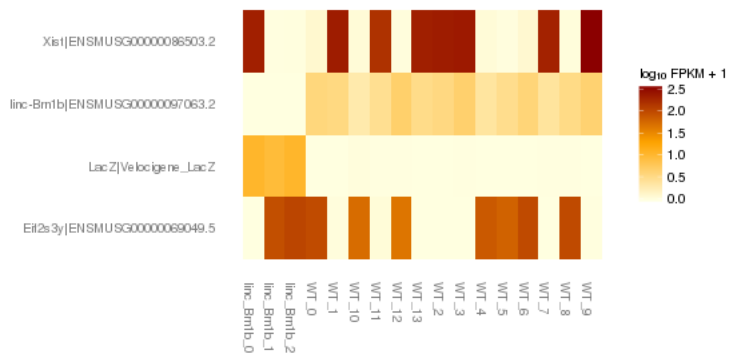

Track visualization



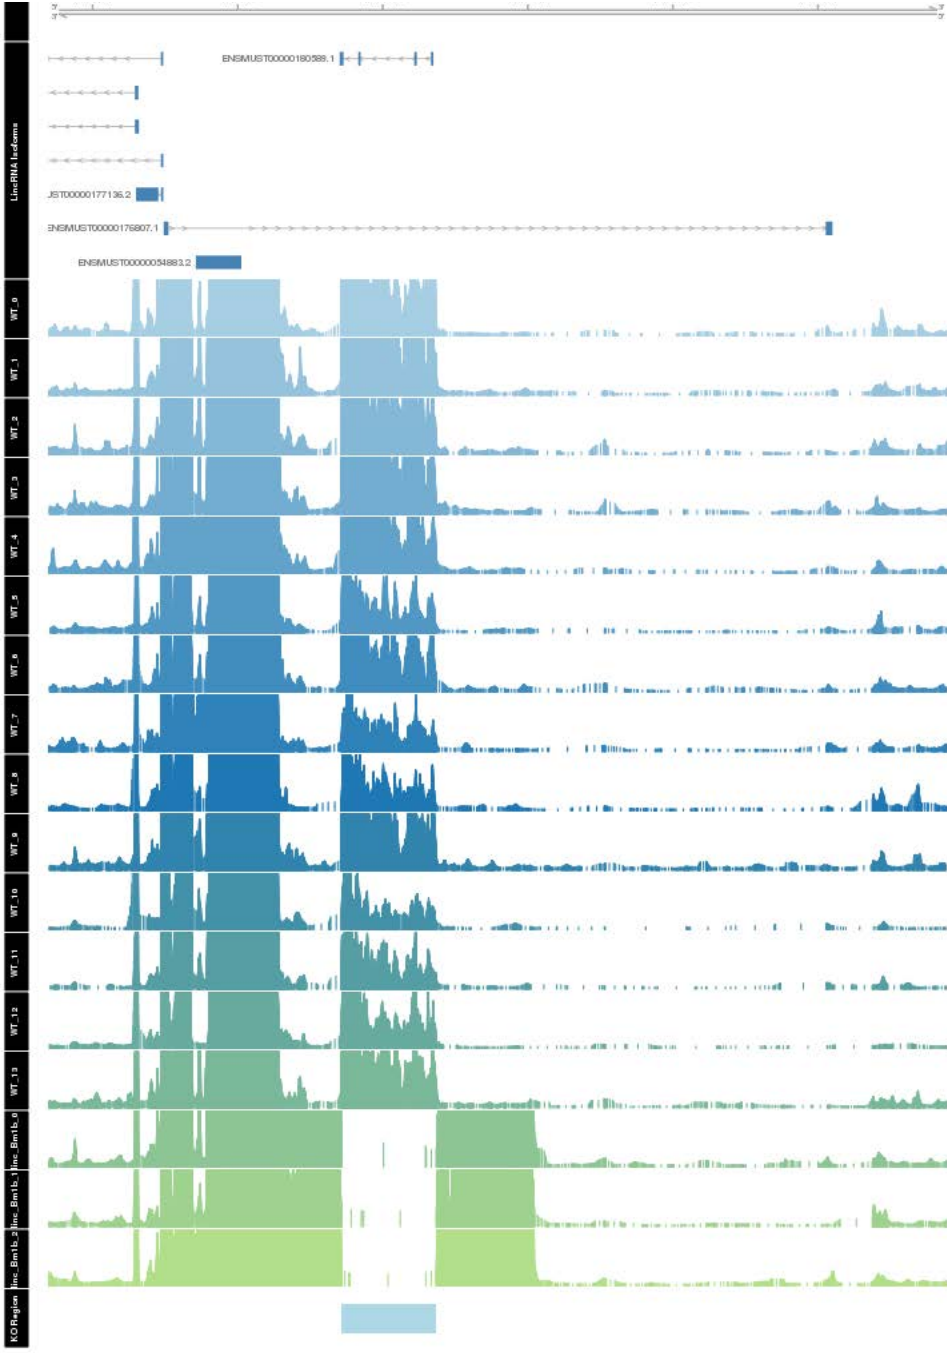

# Differential Analysis

## Differential Genes

There are 130 significantly differentially expressed genes. They are:

**geneAnnot\$gene\_short\_name**

- 1 Gira1
- 2 Sez6
- 3 Nfix
- 4 Grik3
- 5 Dlgap1
- 6 Cacna1e
- 7 Pax2
- 8 Sst
- 9 Crabp2
- 10 Ndrg1
- 11 Mef2c
- 12 Syngn3
- 13 Syn2
- 14 Prox1
- 15 Ebf3
- 16 Phox2b
- 17 Ptgds
- 18 Hivep2
- 19 Rxrg
- 20 Celsr1
- 21 Lhx1
- 22 Kitl
- 23 Gria1
- 24 Fam49a
- 25 Foxg1
- 26 Tfp2a
- 27 Fezf2
- 28 Skor1
- 29 Sla
- 30 Sncg
- 31 Dlx2
- 32 Prph
- 33 Tiam2
- 34 Lbx1
- 35 Nnt
- 36 Msx3
- 37 Asb1

38 Plxna2  
39 Lhx6  
40 Syt13  
41 Chst1  
42 Lamp5  
43 Ntsr1  
  
44 Hsd3b6  
45 Nr4a3  
46 Tal2  
47 Ppp2r2c  
48 Fosl2  
49 Nos1  
50 Mmp17  
51 Uncx  
52 Rph3a  
53 Dlx5  
54 Dync1i1  
55 Rasgef1a  
56 Hdcd3  
57 Mfge8  
58 Tbx20  
59 Thy1  
60 Kirrel3  
61 Dscaml1  
62 Robo3  
63 Camkv  
64 Cntnap3  
65 Gas7  
66 Tbc1d4  
67 Ttc28  
68 4833424O15Rik  
69 Gucy1a3  
70 Snca  
  
71 Arl4d  
72 Tbr1  
73 Lars2  
74 Arx  
75 Vgf  
76 Kcnh3  
77 Neurod6  
78 Neurod2  
79 Satb2  
80 Ttk

81 Hoxb4  
82 Slc6a5  
83 Abcc8  
84 Zfp704  
85 Tlx3  
86 Mpped1  
87 Dlx1  
88 Adamts3  
89 Gm9493  
90 D3Bwg0562e  
91 Cnpy1  
92 Prkce  
93 Hpcal4  
94 Olig1  
95 Nxph3  
96 Fat4  
97 Mc4r  
  
98 Pirt  
  
99 Bcl11b  
100 Pou4f1  
101 Rpl29  
102 Pla2g4e  
103 Slc6a7  
104 Hbb-y  
105 Hbb-bh1  
106 Adamts18  
107 Hba-x  
108 Pign  
109 Kdm5d  
110 Sez6l  
111 Gda  
112 Ppp1r1b  
113 Trank1  
114 Zbtb18  
115 D430041D05Rik  
116 Gpr88  
117 Ptprz1  
118 Ddx3y  
119 Slc17a7  
120 Gm9008  
121 Wdfy1  
122 Gm10709  
123 Kcng1

- 124 Hs3st4
- 125 Dlx6os1
- 126 Myl6
- 127 Skor2
- 128 Lhx8
- 129 Gm26924
- 130 RP24-312G4.2

### Matrix of gene significant differences between conditions

(skip for Brainmap wt-v-ko comparisons)

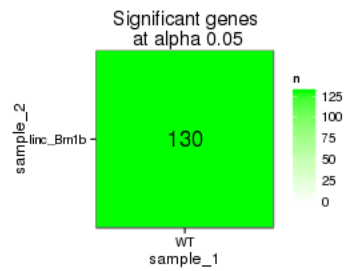

### Significant gene expression differences between conditions

Expression plot (genes):(turned off)

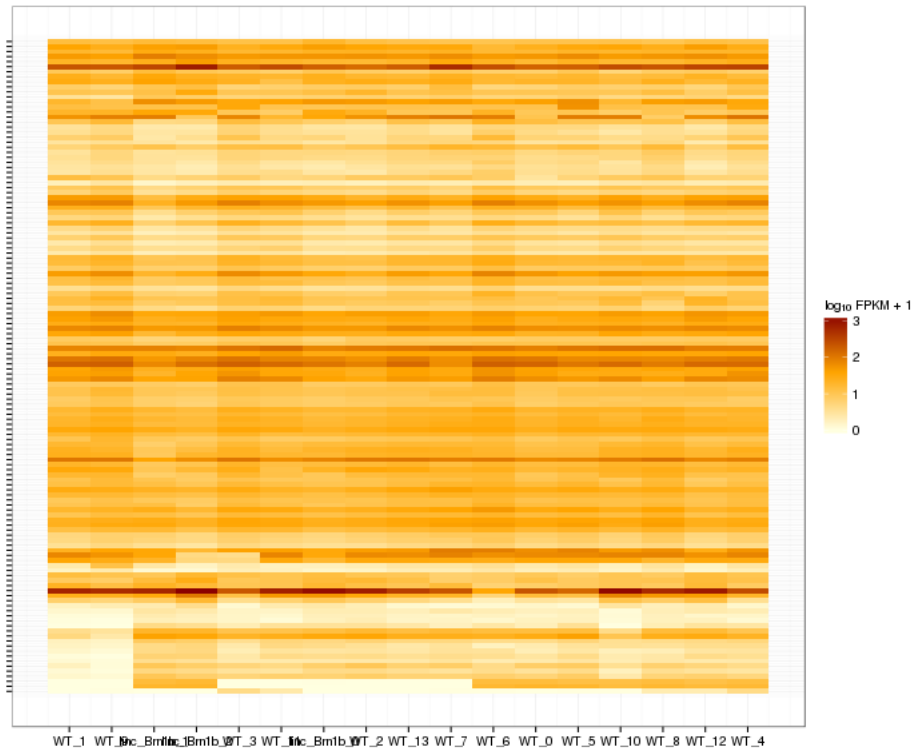

Significant genes with expression >50fpm (any condition):(turned off)

An individual look at each of the highly expressed significantly differentially regulated genes: (eval=false for first pass)

### Expression-level/significance relationship

Scatter plot of significant genes only:

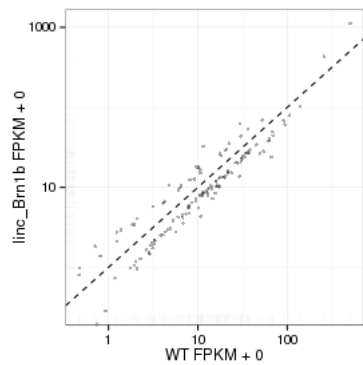

### Volcano Plot

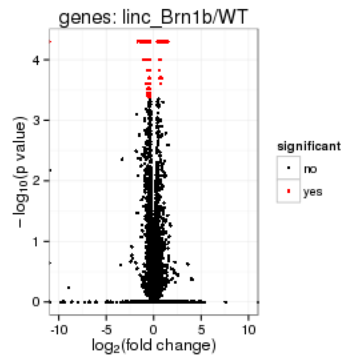

### Volcano plot with significant genes only:

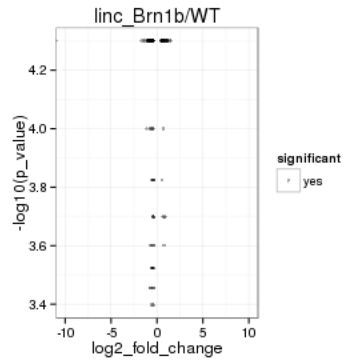

### FoldChange Heatmap



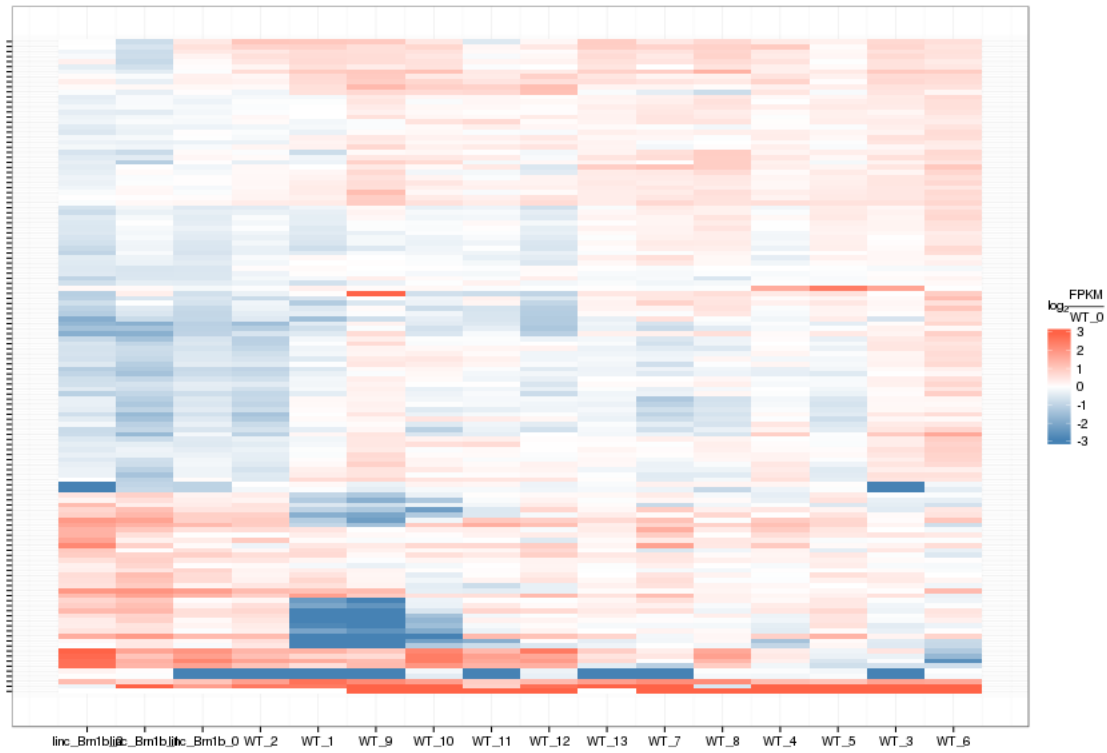

## Differential Splicing

### Differential Isoforms between conditions

Per isoform difference between conditions:

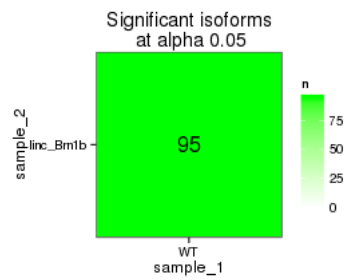

These isoforms are:

**isoAnnot\$gene\_short\_name**

- 1 Nfix
- 2 Grik3
- 3 Rec8
- 4 Crabp2
- 5 Ndrp1
- 6 Mef2c
- 7 Phox2b
- 8 Hivep2
- 9 Celsr1
  
- 10 Lhx1
- 11 Kitl
- 12 Foxg1
- 13 Fezf2
- 14 Sla
- 15 Sncg
- 16 Dlx2
- 17 Prph
- 18 Tiam2
- 19 Lbx1
- 20 Nnt
- 21 Lancl1
- 22 Ngef
- 23 Asb1
- 24 Lypd1
- 25 Lhx6
- 26 Syt13
- 27 Ntsr1
- 28 Tal2
- 29 Fosl2
- 30 Nos1
- 31 Dlx5
- 32 Dync111
- 33 Rasgef1a
- 34 Hddc3
- 35 Thy1
- 36 Kirrel3
  
- 37 Dscaml1
- 38 Camkv
- 39 Gas7
- 40 Fndc3c1

41 Gucy1a3  
42 Sncb  
43 Arl4d  
44 Tbr1  
45 Lars2  
46 Arx  
47 Kcnh3  
48 Neurod6  
49 Sh3rf3  
50 Satb2  
51 Ttk  
52 Hoxb4  
53 Slc6a5  
54 Abcc8  
55 Tlx3  
56 Sox5  
57 Mpped1  
58 Dlx1  
59 Reln  
60 Adamts3  
61 Prkce  
62 Olig1  
63 Nxph3  
64 Fat4  
  
65 Mc4r  
66 Pirt  
67 Bcl11b  
68 Pou4f1  
69 Rpl29  
70 Pla2g4e  
71 Slc6a7  
72 Hbb-y  
73 Hbb-bh1  
74 C130021120Rik  
75 Adamts18  
76 Hba-x  
77 Kcnq3  
78 Pign  
79 Kdm5d  
80 Gda  
81 Opcml  
82 Ptprz1  
83 Ddx3y

84 Tmem132b  
85 Slc17a7  
86 Gm9008  
87 D2hgdh  
88 Wdfy1  
89 Gm10709  
90 Kcng1  
91 Hs3st4  
92 Myl6  
93 Gm26924  
94 RP24-312G4.2

Gene-level DE isoform heatmap

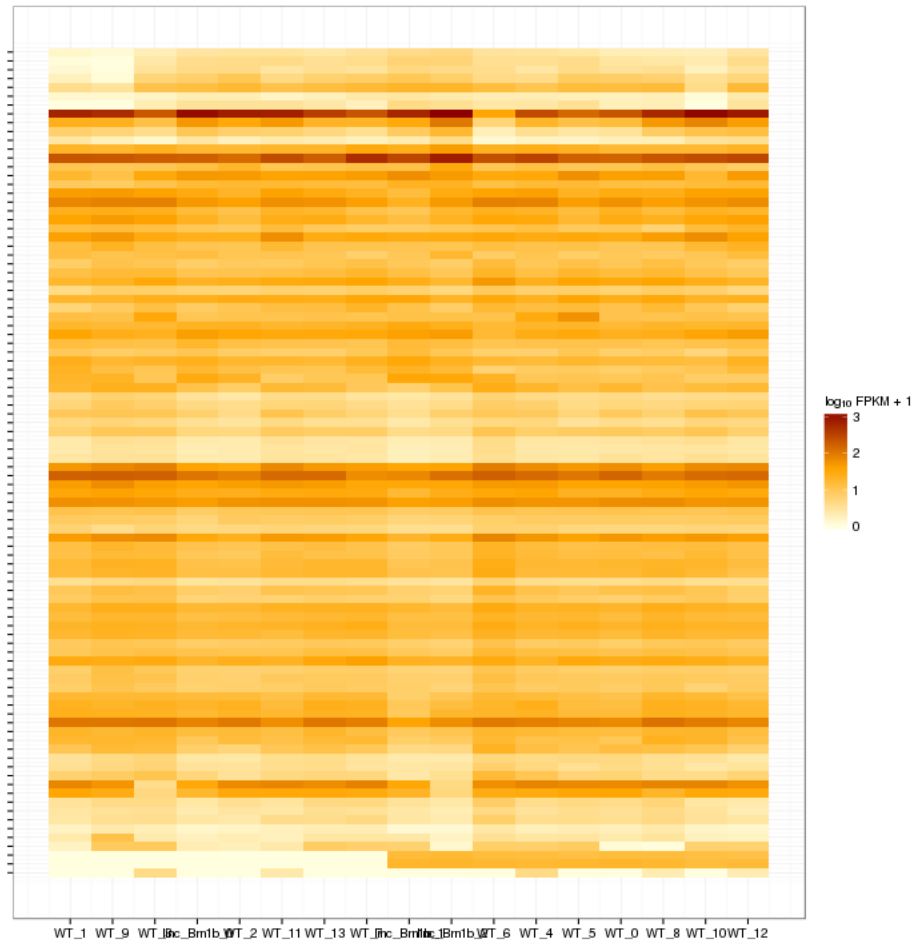

Isoform foldchange heatmap by isoform:

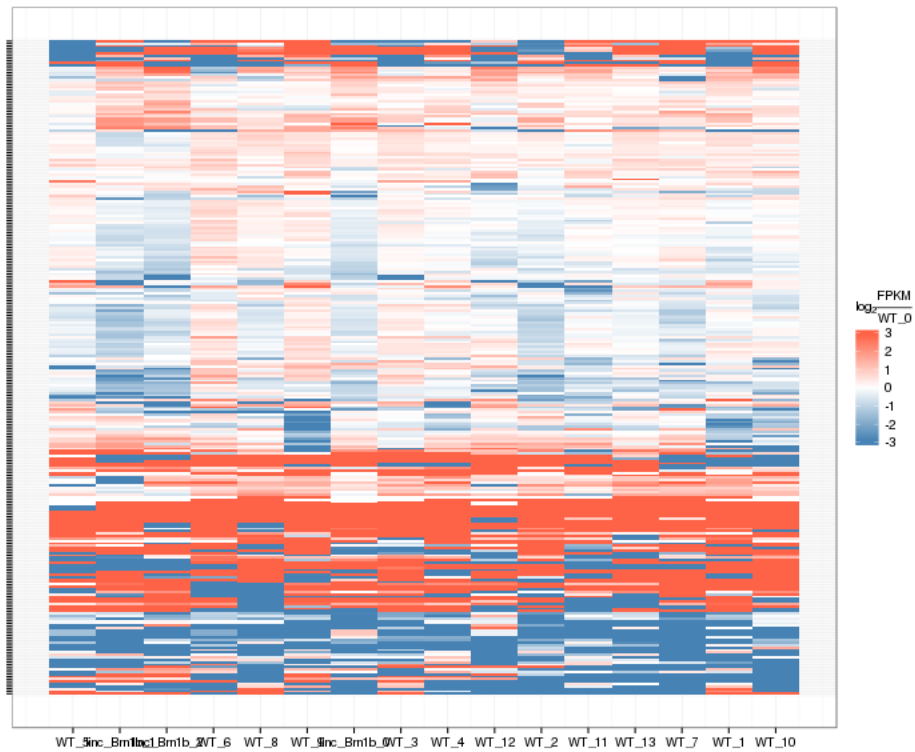

## Differential Splicing between conditions

(eval false for first pass)

Per condition differences in isoforms (Does gene have diff piechart between conditions?)

These genes are:

Splicing heatmap by isoform:

Splicing heatmap by gene

The following are significantly differentially spliced genes (relative portion of isoform per condition):

## Gene/Pathway Analysis

### GSEA

Enrichment and zscores are calculated based on expression in KO vs WT (fpkmKO/fpkmWT), so genes that are down regulated in KO are shown in blue, while upregulation is shown in red.

KO/WT Blue = down in KO Red = Up in KO

Biocarta enrichment:

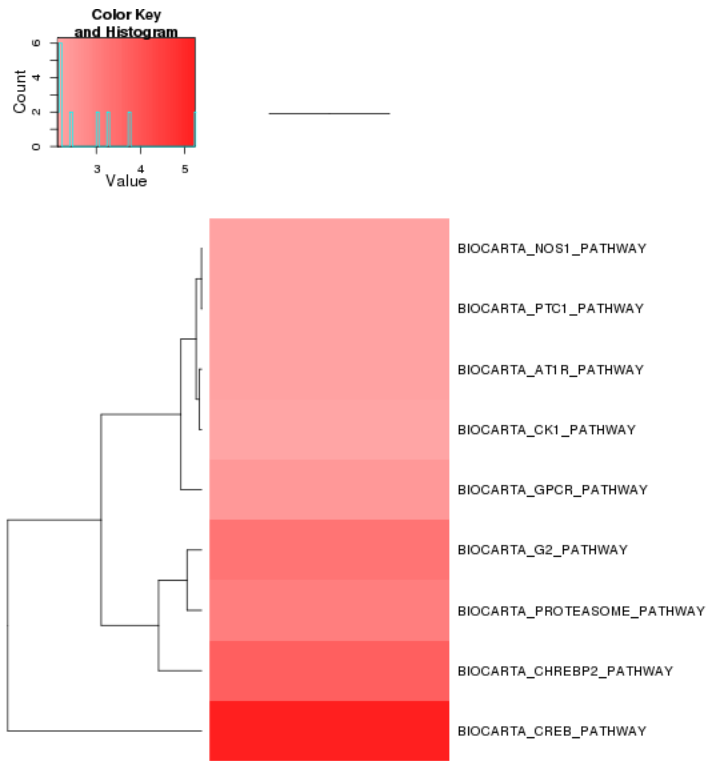

Biocarta zscore:

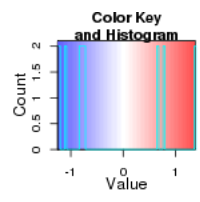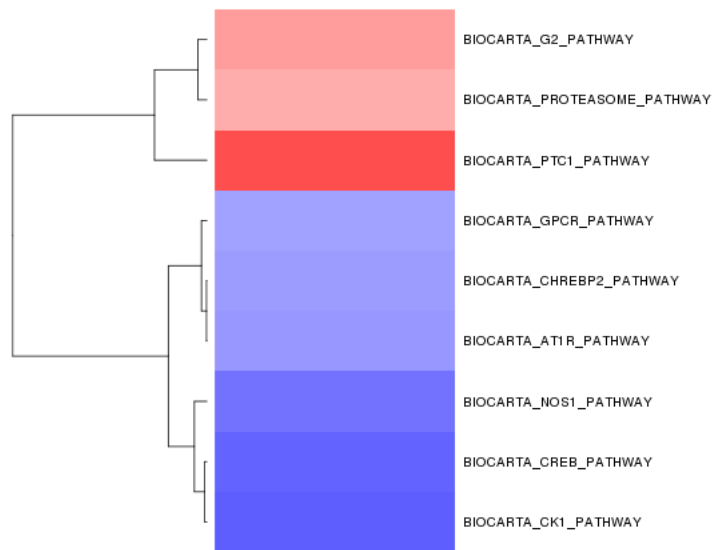

Reactome enrichment:

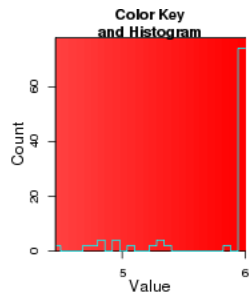

\_\_\_\_\_

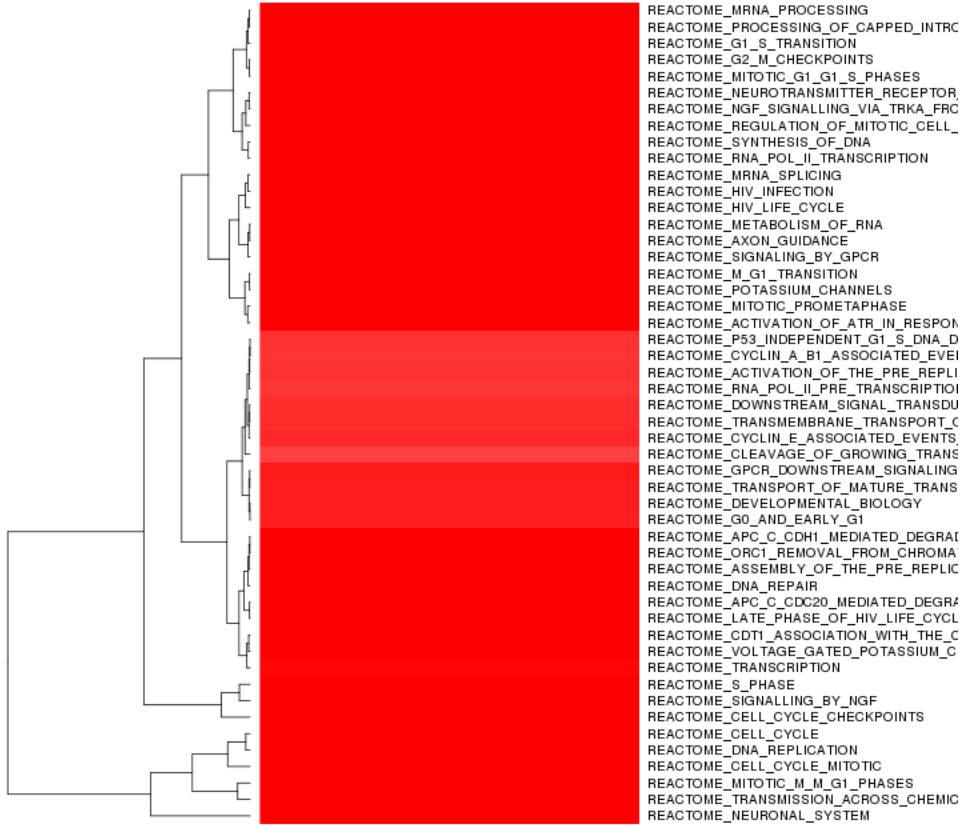

Reactome zscore:



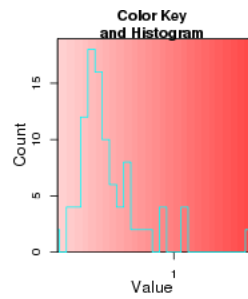

\_\_\_\_\_

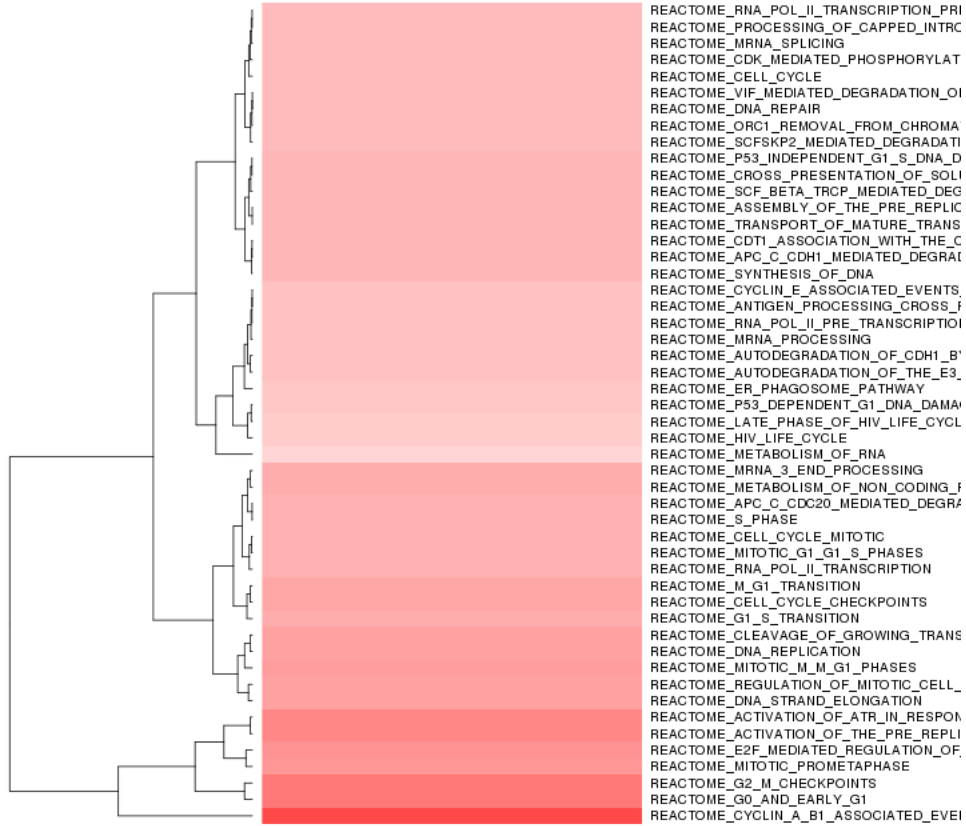

Kegg enrichment:

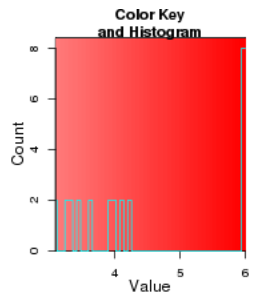

\_\_\_\_\_

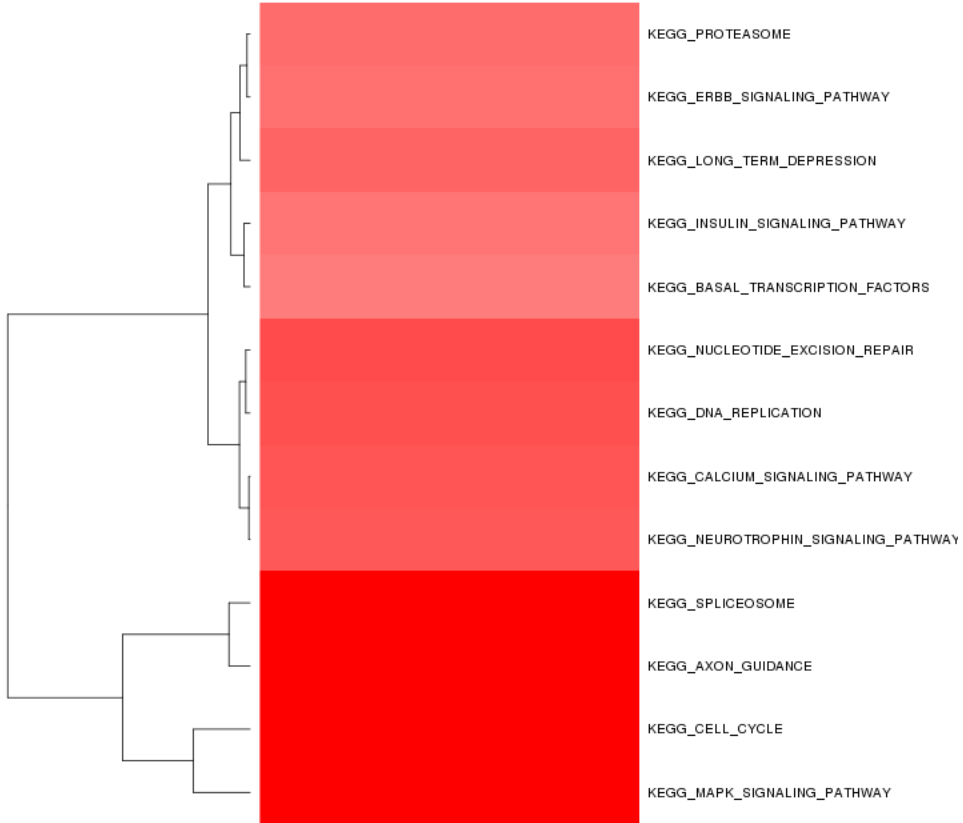

Kegg zscore:

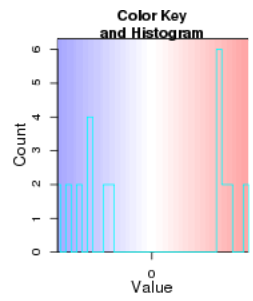

\_\_\_\_\_

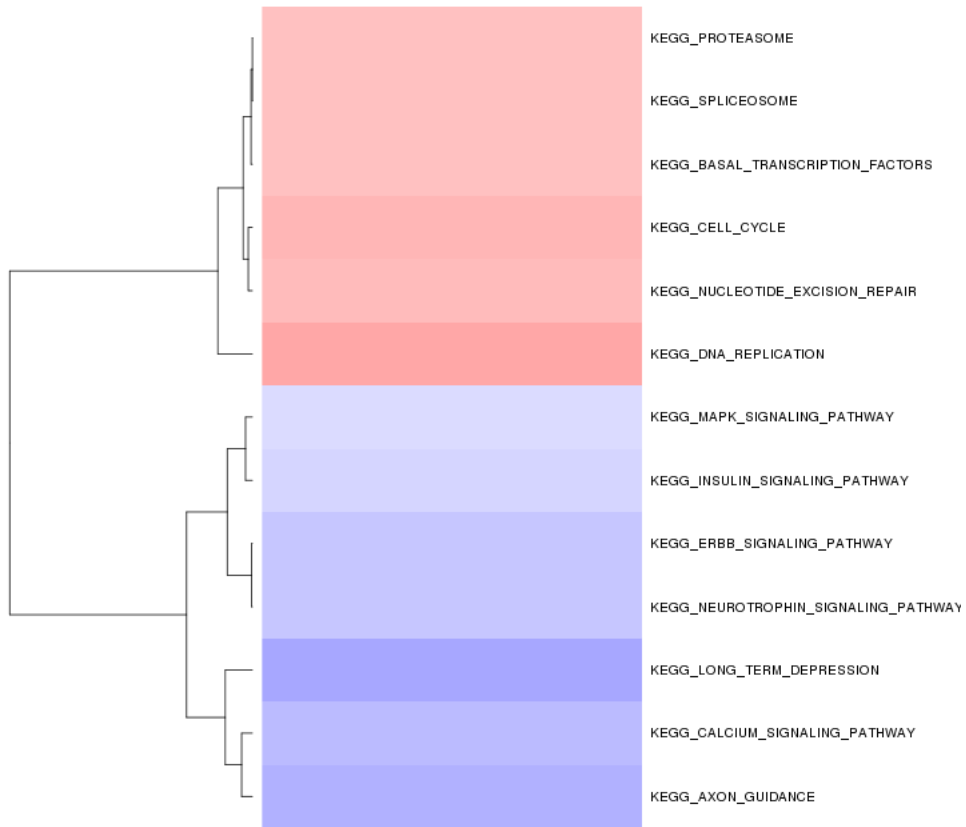

Interneuron enrichment:

## Error: argument is of length zero

Interneuron zscore:

## Error: incorrect number of dimensions

```
## Error: object 'x_ordered' not found
```

```
## Error: error in evaluating the argument 'x' in selecting a method for function 'as.matrix': Error: object 'x_ordered' not found
```

```
## Error: object 'x_ordered' not found
```

Oncogene enrichment:

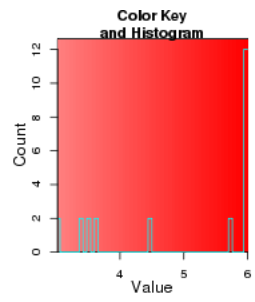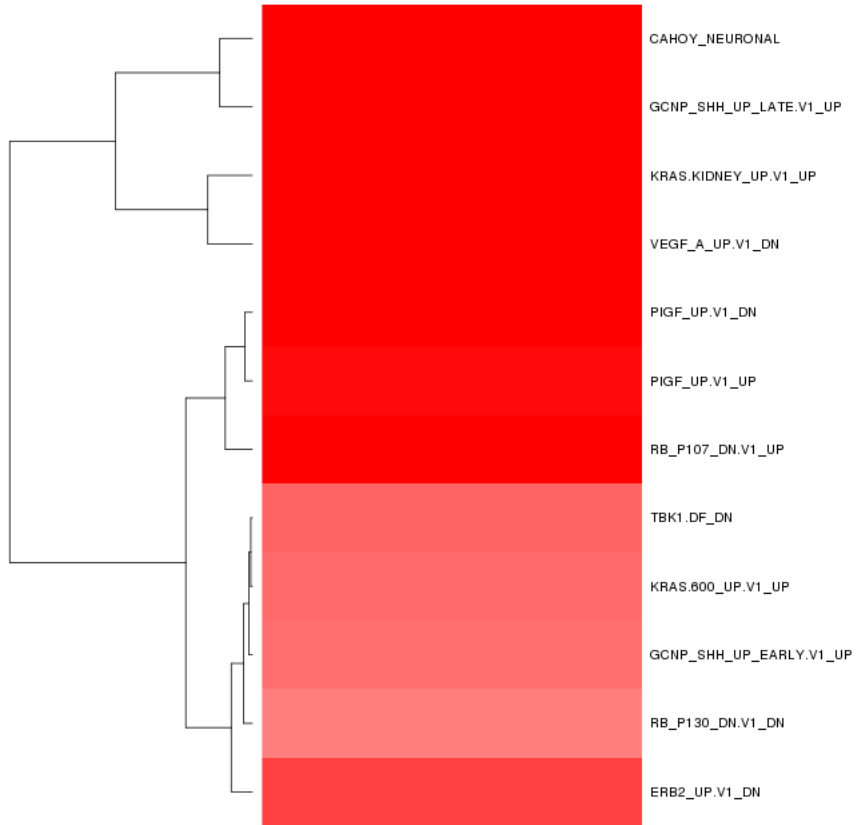

Oncogene zscore:

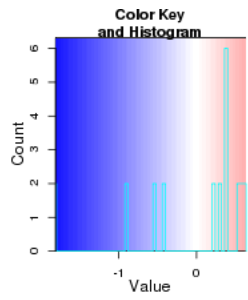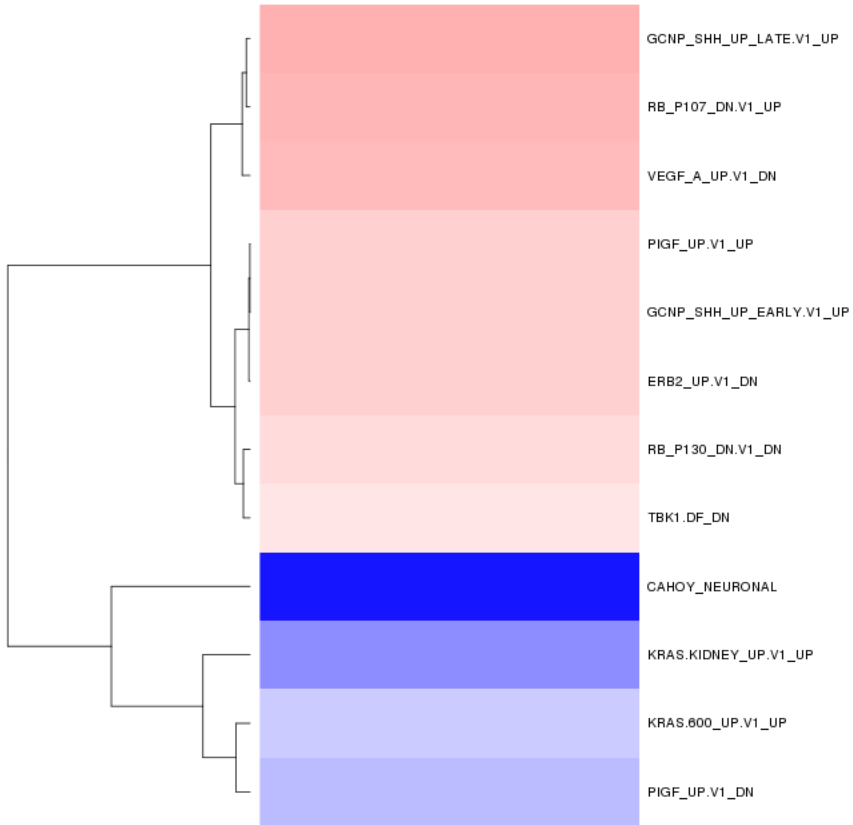

Immuno enrichment:

## Error: no locations are finite

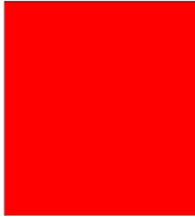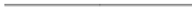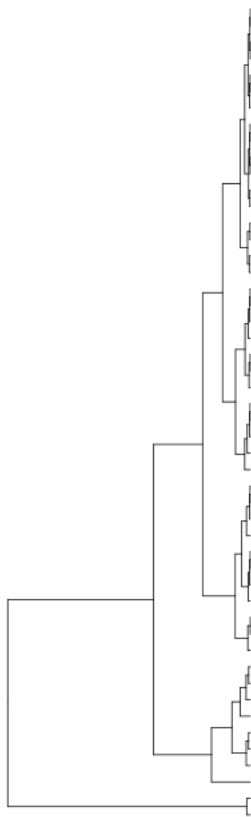

GSE19825\_CD24LOW\_VS\_IL2RA\_HIGH\_DAY3\_  
GSE24634\_IL4\_VS\_CTRL\_TREATED\_NAIVE\_CI  
GSE15930\_STIM\_VS\_STIM\_AND\_IL12\_24H\_CD  
GSE13485\_DAY1\_VS\_DAY3\_YF17D\_VACCINE\_  
GSE30962\_ACUTE\_VS\_CHRONIC\_LCMV\_SECO  
GSE30962\_PRIMARY\_VS\_SECONDARY\_CHRON  
GSE22886\_UNSTIM\_VS\_IL2\_STIM\_NKCELL\_DN  
GSE13485\_DAY1\_VS\_DAY7\_YF17D\_VACCINE\_  
GSE15930\_NAIVE\_VS\_48H\_IN\_VITRO\_STIM\_IF  
GSE3982\_NKCELL\_VS\_TH2\_DN  
GSE30962\_ACUTE\_VS\_CHRONIC\_LCMV\_PRIMA  
GSE24634\_TREG\_VS\_TCONV\_POST\_DAY10\_IL  
GSE15930\_NAIVE\_VS\_24H\_IN\_VITRO\_STIM\_IN  
KAECH\_DAY8\_EFF\_VS\_MEMORY\_CD8\_TCELL\_  
GSE15930\_NAIVE\_VS\_24H\_IN\_VITRO\_STIM\_IL  
GSE15930\_STIM\_VS\_STIM\_AND\_IFNAB\_72H\_C  
GSE24634\_NAIVE\_CD4\_TCELL\_VS\_DAY3\_IL4\_  
GSE22886\_UNSTIM\_VS\_STIM\_MEMORY\_TCELL  
GSE15930\_NAIVE\_VS\_24H\_IN\_VITRO\_STIM\_IN  
GSE7460\_CTRL\_VS\_TGFB\_TREATED\_ACT\_TRE  
GSE24634\_TREG\_VS\_TCONV\_POST\_DAYS\_IL4  
GSE15930\_NAIVE\_VS\_72H\_IN\_VITRO\_STIM\_IF  
GSE12845\_NAIVE\_VS\_PRE\_GC\_TONSIL\_BCEL  
GSE10239\_MEMORY\_VS\_KLRG1INT\_EFF\_CD8\_  
GSE24634\_TEFF\_VS\_TCONV\_DAY10\_IN\_CULTI  
GSE22886\_NAIVE\_CD4\_TCELL\_VS\_48H\_ACT\_  
GSE22886\_NEUTROPHIL\_VS\_DC\_DN  
GSE24634\_TREG\_VS\_TCONV\_POST\_DAY7\_IL4  
GSE29617\_CTRL\_VS\_TIV\_FLU\_VACCINE\_PBMK  
GSE1460\_INTRATHYMIC\_T\_PROGENITOR\_VS\_  
GSE15930\_NAIVE\_VS\_48H\_IN\_VITRO\_STIM\_IL  
GSE15930\_NAIVE\_VS\_48H\_IN\_VITRO\_STIM\_CI  
GSE3982\_MEMORY\_CD4\_TCELL\_VS\_TH2\_DN  
GSE10239\_MEMORY\_VS\_DAY4.5\_EFF\_CD8\_TC  
GSE36476\_CTRL\_VS\_TSST\_ACT\_72H\_MEMOR'  
GSE15930\_NAIVE\_VS\_24H\_IN\_VITRO\_STIM\_CI  
GSE7764\_IL15\_TREATED\_VS\_CTRL\_NK\_CELL  
GSE30962\_PRIMARY\_VS\_SECONDARY\_ACUTE  
GSE24634\_TEFF\_VS\_TCONV\_DAY7\_IN\_CULTU  
GOLDRATH\_NAIVE\_VS\_EFF\_CD8\_TCELL\_DN  
GSE24634\_TEFF\_VS\_TCONV\_DAYS\_IN\_CULTU  
GSE36476\_CTRL\_VS\_TSST\_ACT\_40H\_MEMOR'  
GSE36476\_CTRL\_VS\_TSST\_ACT\_72H\_MEMOR'  
GSE36476\_CTRL\_VS\_TSST\_ACT\_40H\_MEMOR'  
GSE10239\_NAIVE\_VS\_DAY4.5\_EFF\_CD8\_TCEL  
GSE22886\_UNSTIM\_VS\_IL15\_STIM\_NKCELL\_D  
GSE13485\_DAY1\_VS\_DAY21\_YF17D\_VACCINE  
GOLDRATH\_EFF\_VS\_MEMORY\_CD8\_TCELL\_UF  
GSE15750\_DAY6\_VS\_DAY10\_TRAFKO\_EFF\_C  
GSE15750\_DAY6\_VS\_DAY10\_EFF\_CD8\_TCELL

Immuno zscore:

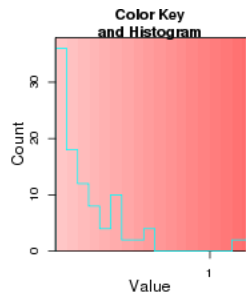

\_\_\_\_\_

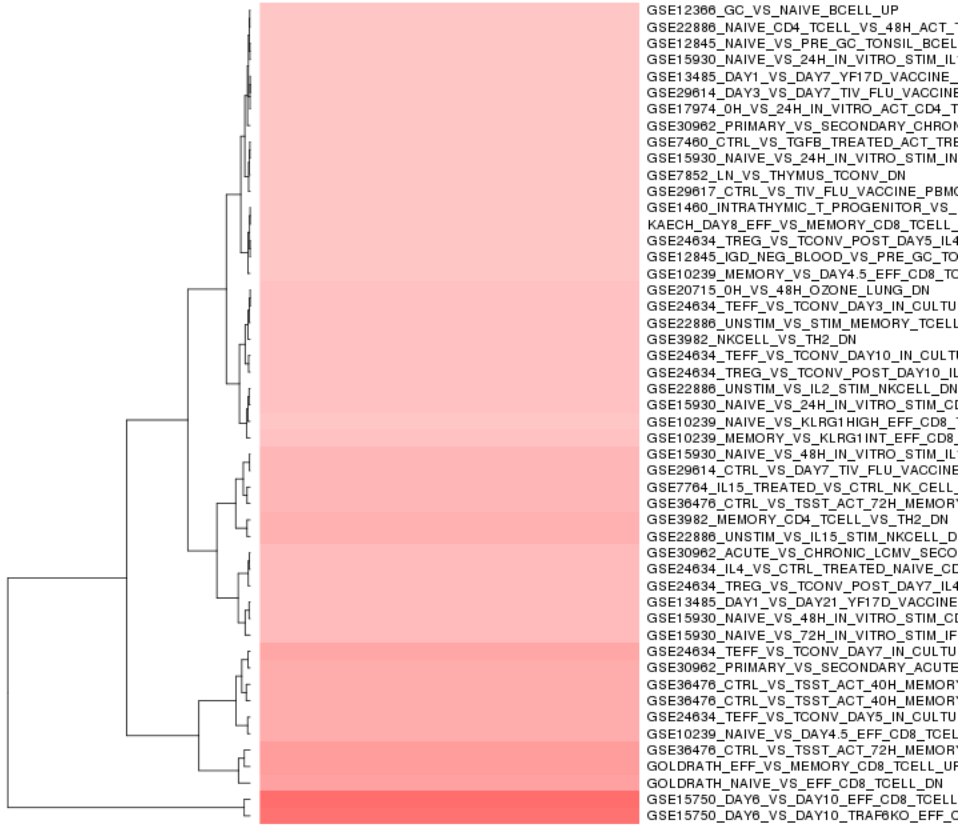

TF enrichment:

## Error: subscript out of bounds



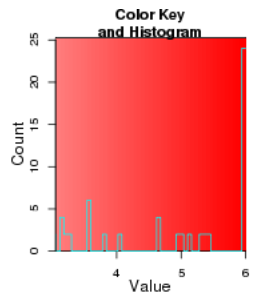

\_\_\_\_\_

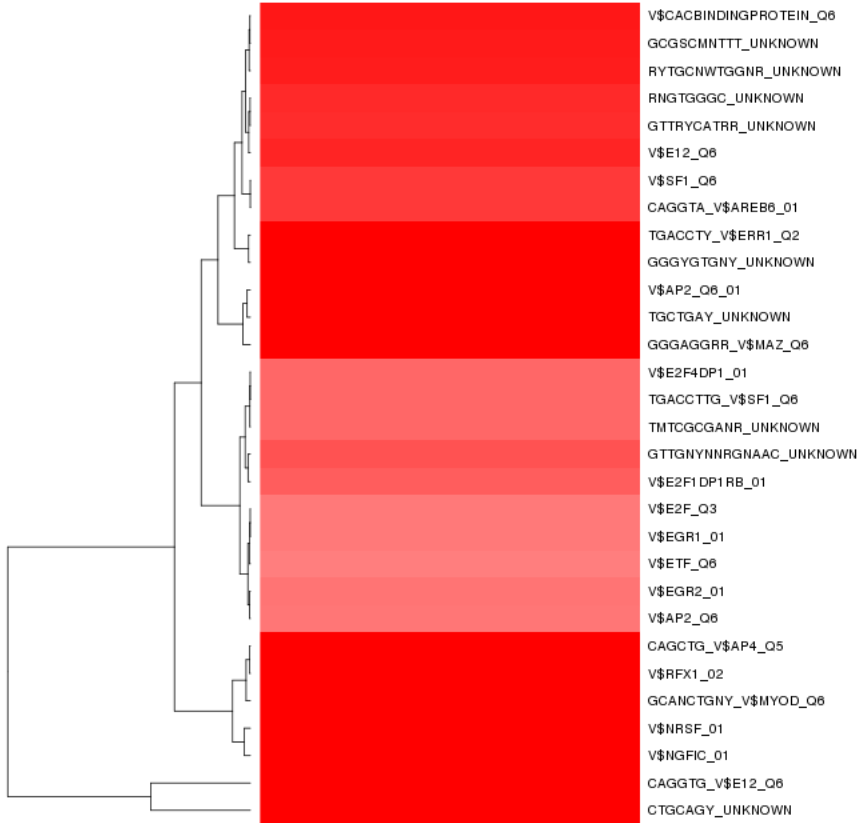

TF zscore:

## Error: subscript out of bounds

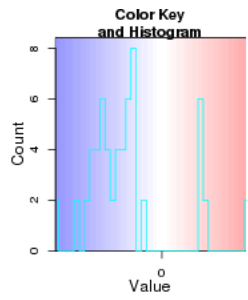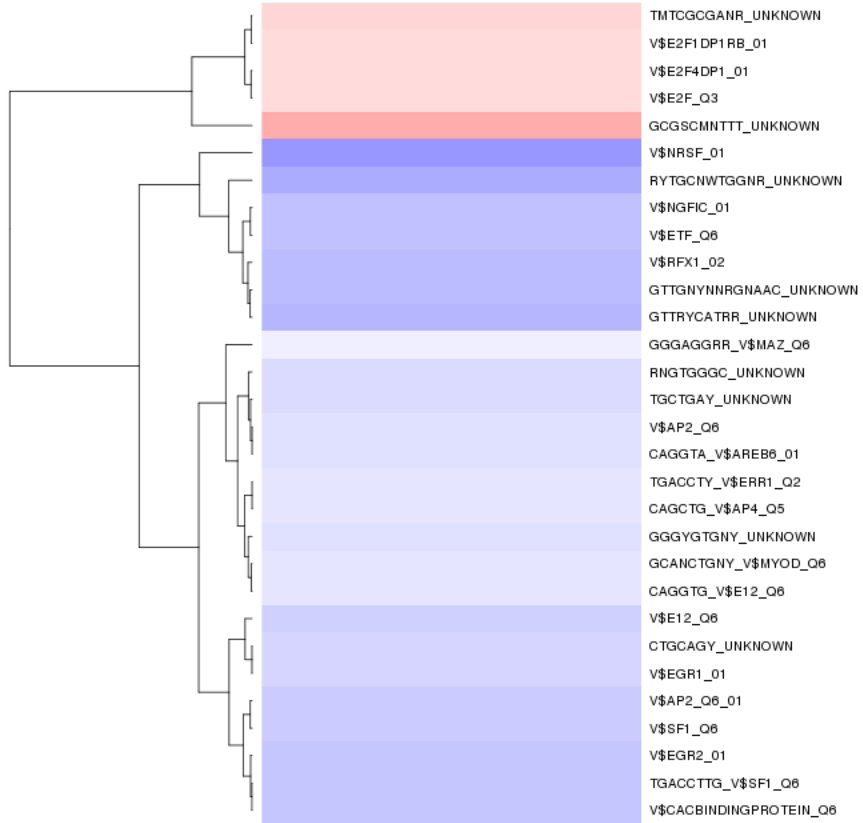

## GO enrichment

Cluster profiler used to call enrichments of significantly differentially regulated genes that map to Entrez IDs.

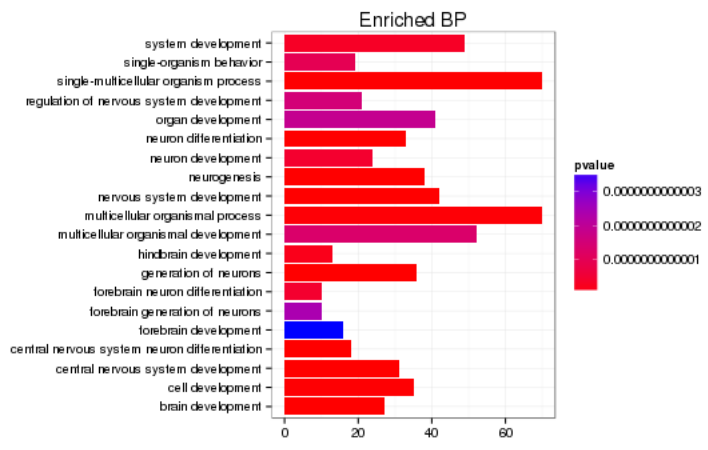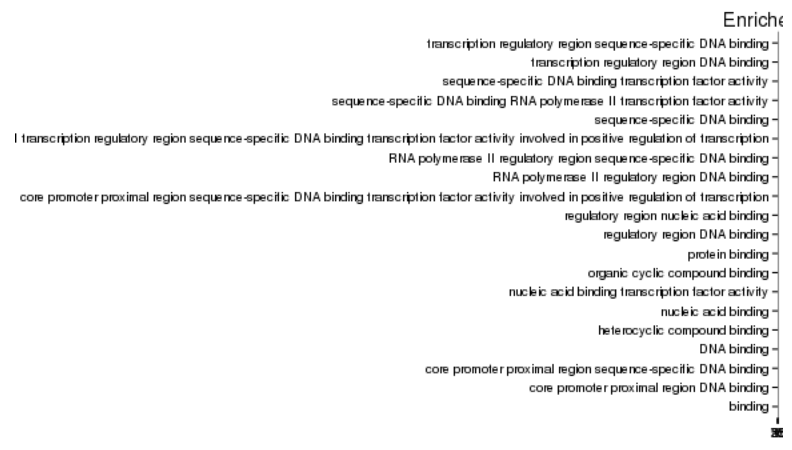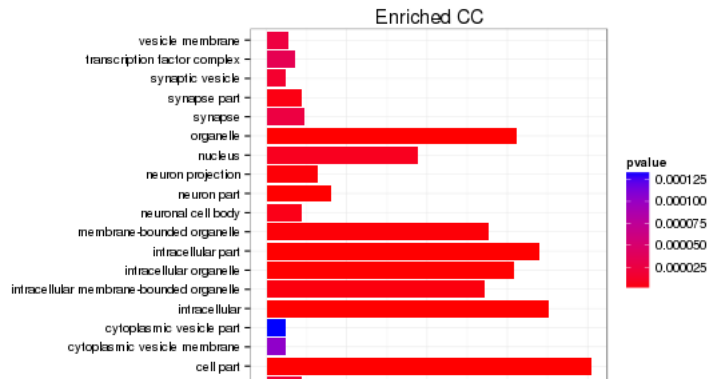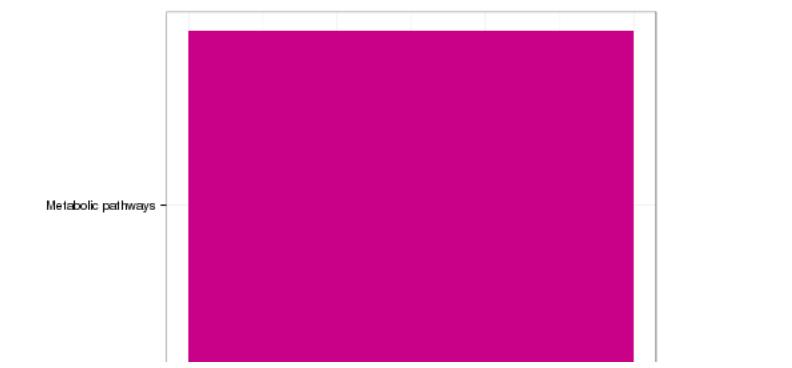

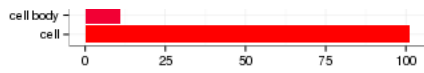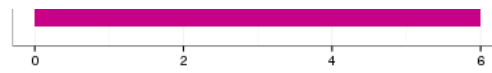

```
## Error: 'x' and 'units' must have length > 0
```

## Enrichment or depletion for stage-specific cell cycle markers

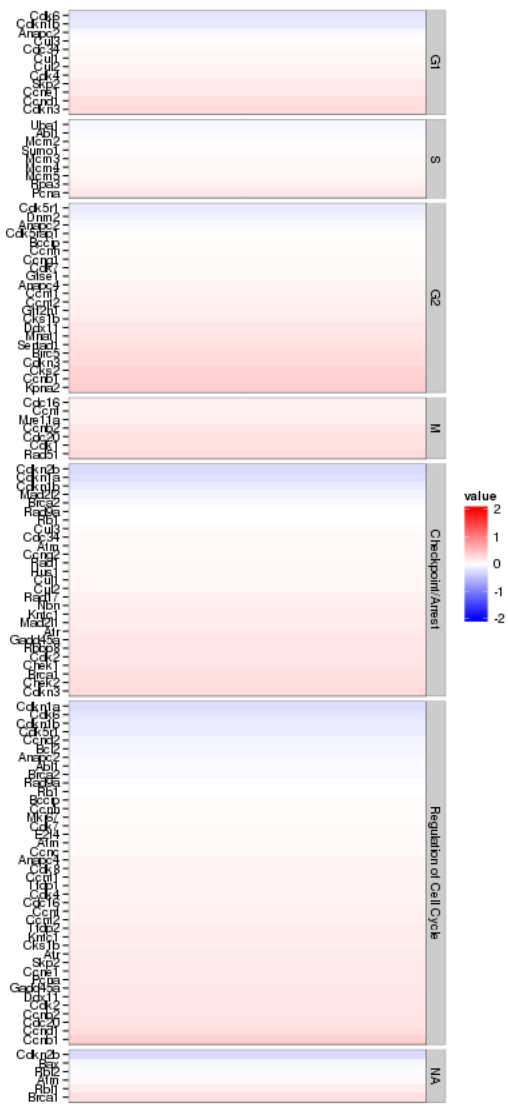

Enrichment or depletion for markers of specific cortical layers

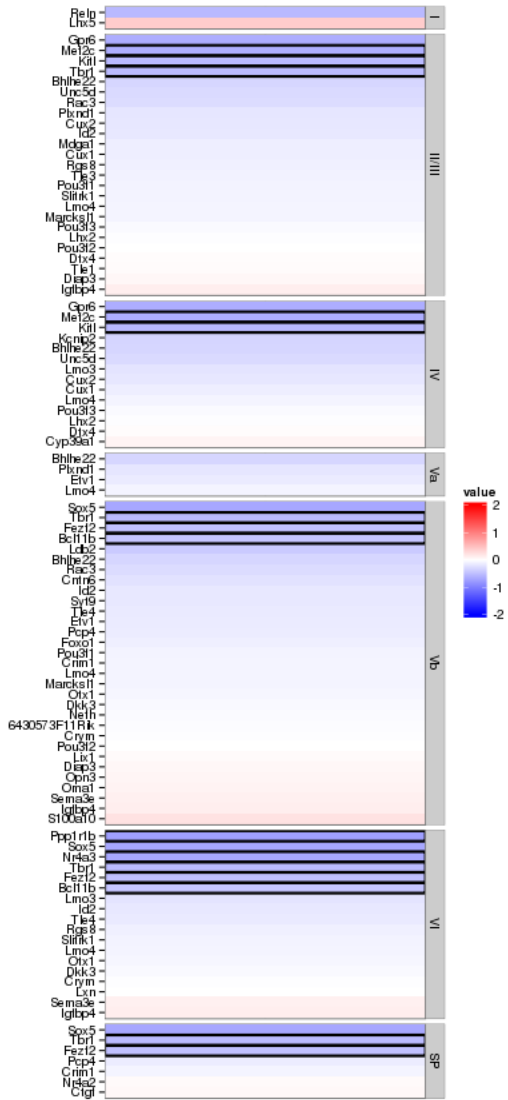

Enrichment or depletion for specific neural cell types

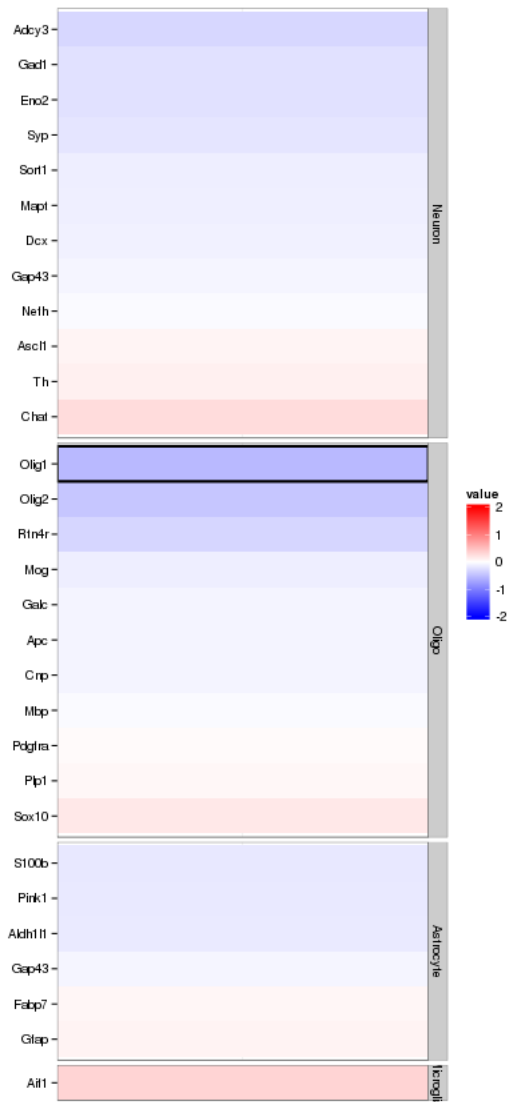

**Enrichment or Depletion of neural differentiation markers**

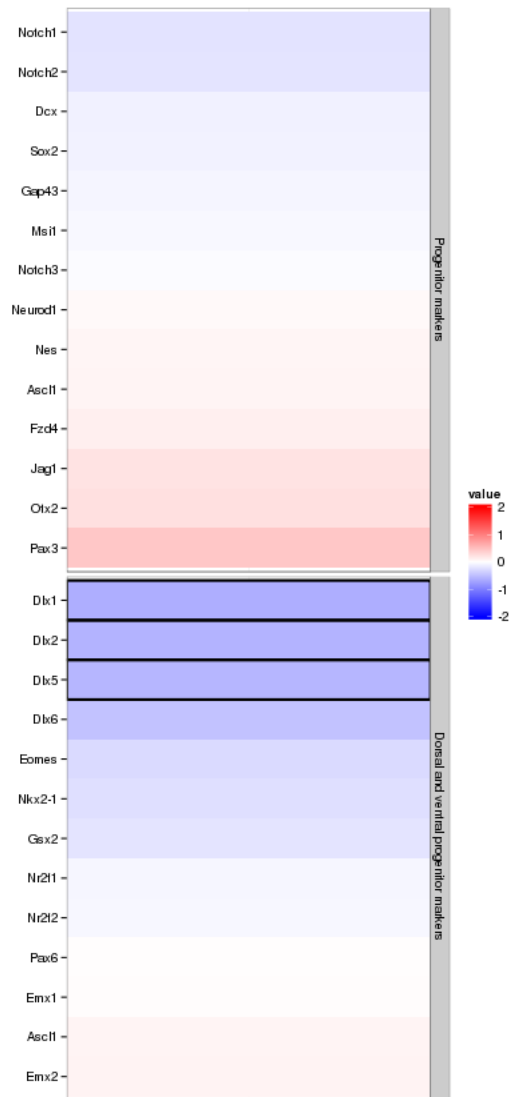

## Cis vs Trans (locally)

$\log_2$  Foldchange and test statistic are calculated with the ratio of  $\text{fpkm(KO)}/\text{fpkm(WT)}$ , thus the  $\text{test\_stat}$  is positive if a gene is higher in the KO and negative if a gene has lower expression in the KO

The pvalue for 0 genes significantly regulated in a region this size is: 1



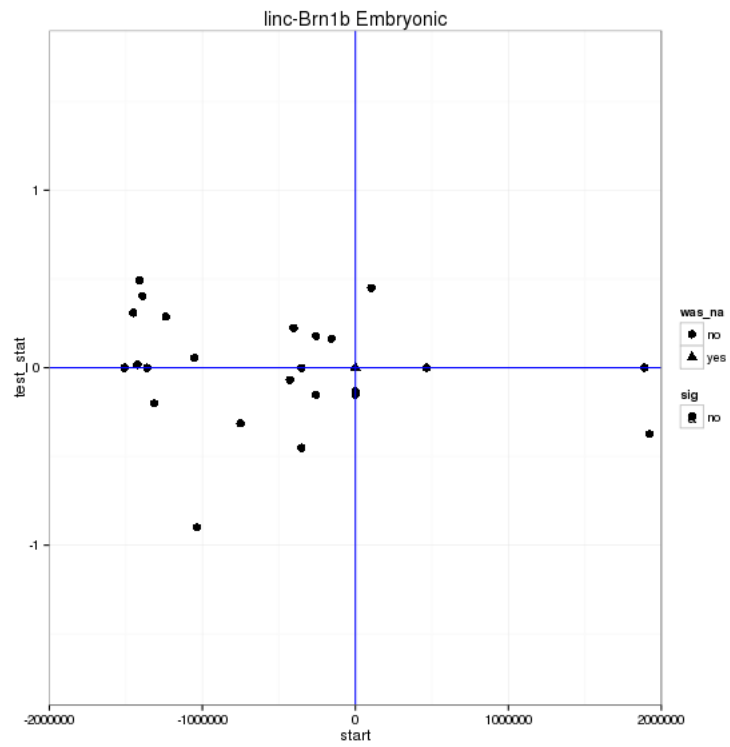

## Notes

Samples used are:

10

- 1 JR753
- 2 JR750
- 3 JR771
- 4 JR755
- 5 JR811
- 6 JR768
- 7 JR761
- 8 JR815
- 9 JR789
- 10 JR748
- 11 JR716
- 12 JR717
- 13 JR719
- 14 JR756

15 JR758  
16 JR764  
17 JR808

## Replicates

| file                                                                          | sample_name | replicate | rep_name    | total_mass  | norm_mass   | internal_scale | external_scale |
|-------------------------------------------------------------------------------|-------------|-----------|-------------|-------------|-------------|----------------|----------------|
| 1 /n/rinn_data1/seq/Igoff/Projects/BrainMap/data/quants/JR753/abundances.cxb  | WT          | 0         | WT_0        | 39331900.00 | 32398700.00 | 1.25           | 1.00           |
| 2 /n/rinn_data1/seq/Igoff/Projects/BrainMap/data/quants/JR750/abundances.cxb  | WT          | 1         | WT_1        | 36031100.00 | 32398700.00 | 1.09           | 1.00           |
| 3 /n/rinn_data1/seq/Igoff/Projects/BrainMap/data/quants/JR771/abundances.cxb  | WT          | 2         | WT_2        | 38857100.00 | 32398700.00 | 1.22           | 1.00           |
| 4 /n/rinn_data1/seq/Igoff/Projects/BrainMap/data/quants/JR755/abundances.cxb  | WT          | 3         | WT_3        | 41811300.00 | 32398700.00 | 1.28           | 1.00           |
| 5 /n/rinn_data1/seq/Igoff/Projects/BrainMap/data/quants/JR811/abundances.cxb  | WT          | 4         | WT_4        | 38172800.00 | 32398700.00 | 1.19           | 1.00           |
| 6 /n/rinn_data1/seq/Igoff/Projects/BrainMap/data/quants/JR768/abundances.cxb  | WT          | 5         | WT_5        | 28375200.00 | 32398700.00 | 0.89           | 1.00           |
| 7 /n/rinn_data1/seq/Igoff/Projects/BrainMap/data/quants/JR761/abundances.cxb  | WT          | 6         | WT_6        | 31706200.00 | 32398700.00 | 0.97           | 1.00           |
| 8 /n/rinn_data1/seq/Igoff/Projects/BrainMap/data/quants/JR815/abundances.cxb  | WT          | 7         | WT_7        | 29733100.00 | 32398700.00 | 0.91           | 1.00           |
| 9 /n/rinn_data1/seq/Igoff/Projects/BrainMap/data/quants/JR789/abundances.cxb  | WT          | 8         | WT_8        | 27681500.00 | 32398700.00 | 0.85           | 1.00           |
| 10 /n/rinn_data1/seq/Igoff/Projects/BrainMap/data/quants/JR748/abundances.cxb | WT          | 9         | WT_9        | 32367000.00 | 32398700.00 | 0.95           | 1.00           |
| 11 /n/rinn_data1/seq/Igoff/Projects/BrainMap/data/quants/JR716/abundances.cxb | WT          | 10        | WT_10       | 26144700.00 | 32398700.00 | 0.80           | 1.00           |
| 12 /n/rinn_data1/seq/Igoff/Projects/BrainMap/data/quants/JR717/abundances.cxb | WT          | 11        | WT_11       | 25565400.00 | 32398700.00 | 0.79           | 1.00           |
| 13 /n/rinn_data1/seq/Igoff/Projects/BrainMap/data/quants/JR719/abundances.cxb | WT          | 12        | WT_12       | 22697800.00 | 32398700.00 | 0.68           | 1.00           |
| 14 /n/rinn_data1/seq/Igoff/Projects/BrainMap/data/quants/JR756/abundances.cxb | WT          | 13        | WT_13       | 38948900.00 | 32398700.00 | 1.20           | 1.00           |
| 15 /n/rinn_data1/seq/Igoff/Projects/BrainMap/data/quants/JR758/abundances.cxb | linc_Bm1b   | 0         | linc_Bm1b_0 | 41595700.00 | 32398700.00 | 1.31           | 1.00           |
| 16 /n/rinn_data1/seq/Igoff/Projects/BrainMap/data/quants/JR764/abundances.cxb | linc_Bm1b   | 1         | linc_Bm1b_1 | 30294500.00 | 32398700.00 | 0.95           | 1.00           |
| 17 /n/rinn_data1/seq/Igoff/Projects/BrainMap/data/quants/JR808/abundances.cxb | linc_Bm1b   | 2         | linc_Bm1b_2 | 31223700.00 | 32398700.00 | 0.97           | 1.00           |

## Session Info

```
## R version 3.0.2 (2013-09-25)
## Platform: x86_64-unknown-linux-gnu (64-bit)
##
## locale:
## [1] LC_CTYPE=en_US.UTF-8      LC_NUMERIC=C
## [3] LC_TIME=en_US.UTF-8      LC_COLLATE=en_US.UTF-8
## [5] LC_MONETARY=en_US.UTF-8  LC_MESSAGES=en_US.UTF-8
## [7] LC_PAPER=en_US.UTF-8     LC_NAME=C
## [9] LC_ADDRESS=C             LC_TELEPHONE=C
## [11] LC_MEASUREMENT=en_US.UTF-8 LC_IDENTIFICATION=C
##
## attached base packages:
## [1] grid      parallel  methods  stats    graphics grDevices utils
## [8] datasets base
##
## other attached packages:
## [1] plyr_1.8.1
## [2] stringr_0.6.2
## [3] seqbias_1.10.0
```

```

## [4] BSgenome.Mmusculus.UCSC.mm10_1.3.19
## [5] BSgenome_1.30.0
## [6] Biostrings_2.30.1
## [7] gdata_2.13.3
## [8] GO.db_2.10.1
## [9] org.Mm.eg.db_2.10.1
## [10] clusterProfiler_1.13.1
## [11] DOSE_2.0.0
## [12] ReactomePA_1.6.1
## [13] AnnotationDbi_1.24.0
## [14] Biobase_2.22.0
## [15] mgcv_1.7-29
## [16] nlme_3.1-117
## [17] RMySQL_0.9-3
## [18] RColorBrewer_1.0-5
## [19] gridExtra_0.9.1
## [20] gtable_0.1.2
## [21] marray_1.40.0
## [22] gplots_2.13.0
## [23] GSA_1.03
## [24] limma_3.18.13
## [25] xtable_1.7-3
## [26] cummeRbund_2.7.2
## [27] Gviz_1.6.0
## [28] rtracklayer_1.22.7
## [29] GenomicRanges_1.14.4
## [30] XVector_0.2.0
## [31] IRanges_1.20.7
## [32] fastcluster_1.1.13
## [33] reshape2_1.4
## [34] ggplot2_1.0.0
## [35] RSQLite_0.11.4
## [36] DBI_0.2-7
## [37] BiocGenerics_0.8.0
## [38] knitr_1.6
##
## loaded via a namespace (and not attached):
## [1] biomaRt_2.18.0      biovizBase_1.10.8   bitops_1.0-6
## [4] caTools_1.17        cluster_1.15.2      colorspace_1.2-4
## [7] dichromat_2.0-0     digest_0.6.4        DO.db_2.7
## [10] evaluate_0.5.5      formatR_0.10        Formula_1.1-1
## [13] GenomicFeatures_1.14.5 GOsemSim_1.20.3     graph_1.40.1
## [16] graphite_1.8.1      gtools_3.4.1        Hmisc_3.14-4
## [19] igrph_0.7.1         KEGG.db_2.10.1     KernSmooth_2.23-12
## [22] labeling_0.2        lattice_0.20-29     latticeExtra_0.6-26
## [25] MASS_7.3-33         Matrix_1.1-3        munsell_0.4.2
## [28] org.Hs.eg.db_2.10.1 proto_0.3-10        qvalue_1.36.0
## [31] Rcpp_0.11.2         RCurl_1.95-4.1     reactome.db_1.46.1
## [34] Rsamtools_1.14.3    scales_0.2.4        splines_3.0.2
## [37] stats4_3.0.2        survival_2.37-7     tcltk_3.0.2
## [40] tools_3.0.2         XML_3.98-1.1       zlibbioc_1.8.0

```

## Run Info

```
##          param
## 1      cmd_line
## 2          version
## 3  SVN_revision
## 4  boost_version
## 5          genome
##
## 1 cuffdiff -p 10 -L WT,linc-Brn1b -o /n/rinn_data1/seq/lgoff/Projects/BrainMap/data/diffs/linc-Brn1b_vs_WT_Embryonic /n/rinn_data1/seq/lgoff/Projects/Br
## 2
## 3
## 4
## 5
```

# linc-Cox2 KO vs WT (Adult)

This file shows the wt-v-ko comparison for linc-Cox2.

Cuff overview:

```
## CuffSet instance with:  
## 2 samples  
## 26754 genes  
## 77524 isoforms  
## 0 TSS  
## 23066 CDS  
## 0 promoters  
## 0 splicing  
## 19954 relCDS
```

## QC

### Dispersion

Dispersion plot for genes in cuff: (Overdispersion can lead to innacurate quants)

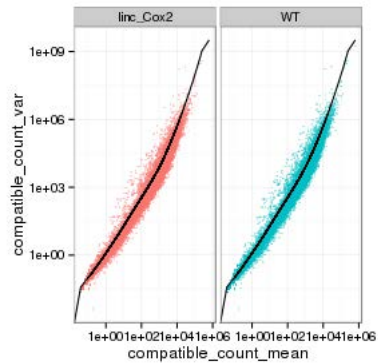

### Cross-replicate variability (fpkmSCVplot)

Differences in CV 2 can result in lower numbers of differentially expressed genes due to a higher degree of variability between replicate fpkm estimates.

Genes:

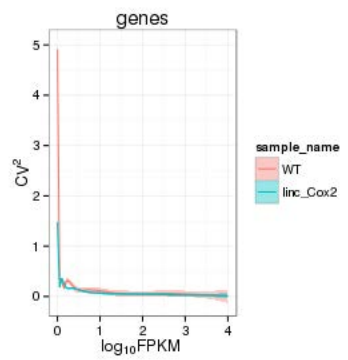

Isoforms:

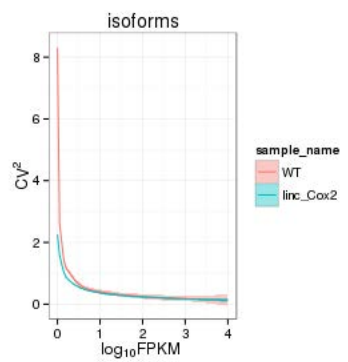

## MvA plot

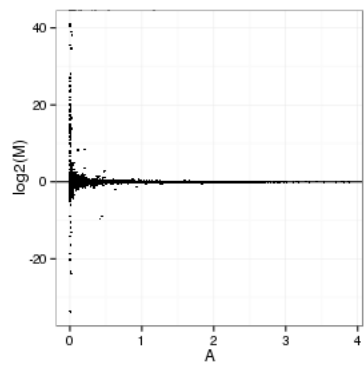

MvA plot counts

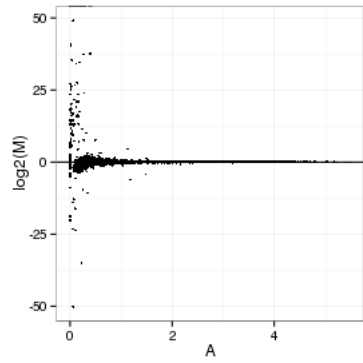

## Scatterplot matrix

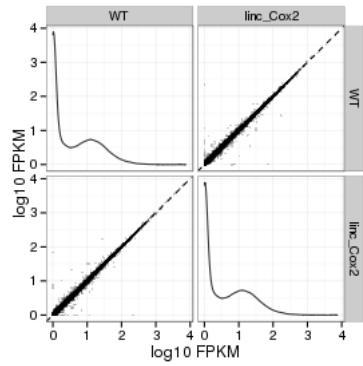

## Distributions

### Boxplots

Boxplot (genes)

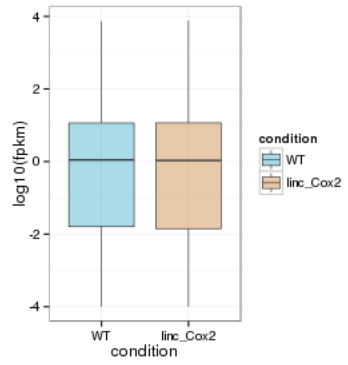

Boxplot (genes, replicates)

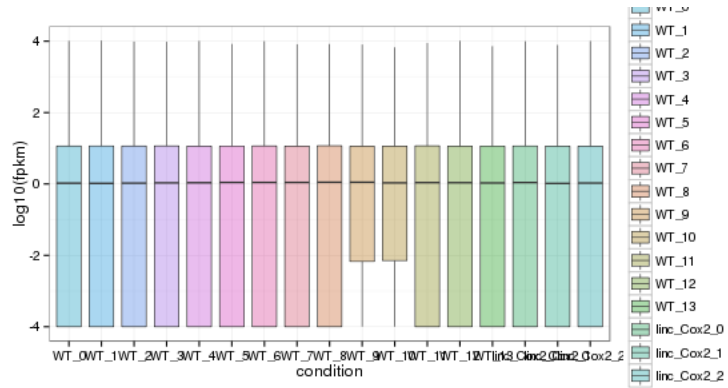

Boxplot (isoforms)

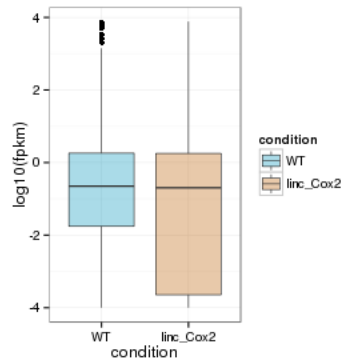

Boxplot (isoforms, replicates)



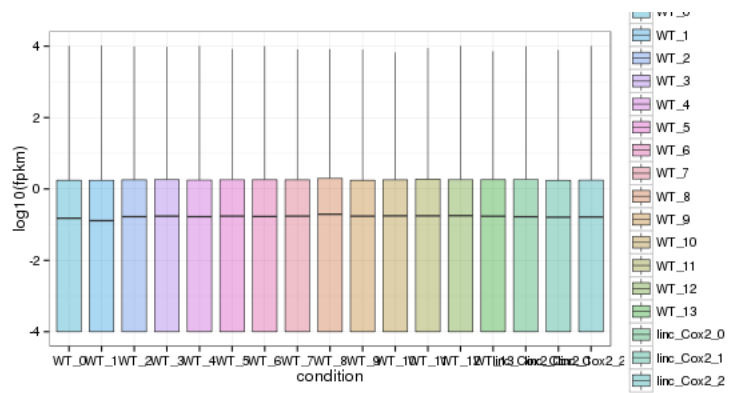

## Density

Density (genes)

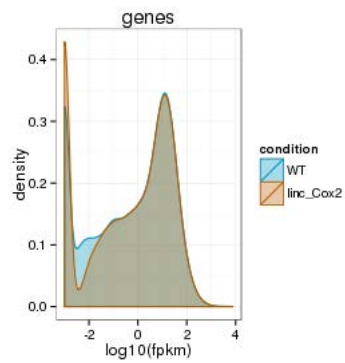

Density (genes, replicates)

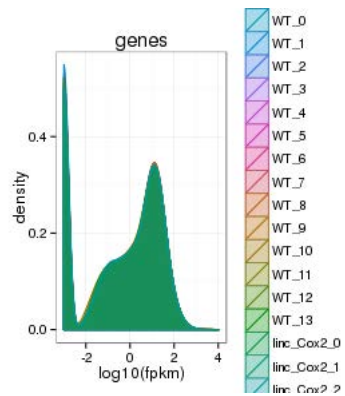

# Clustering

## Replicate Clusters

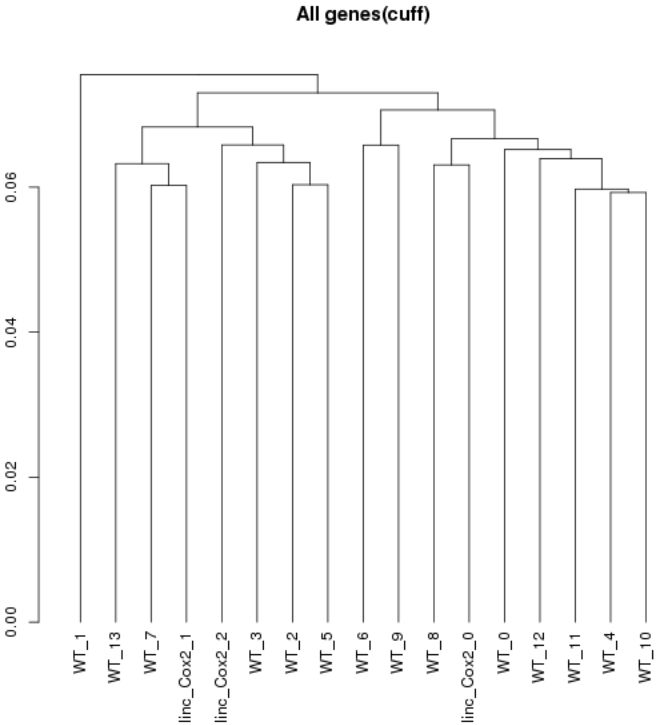

## NULL

## PCA (genes)

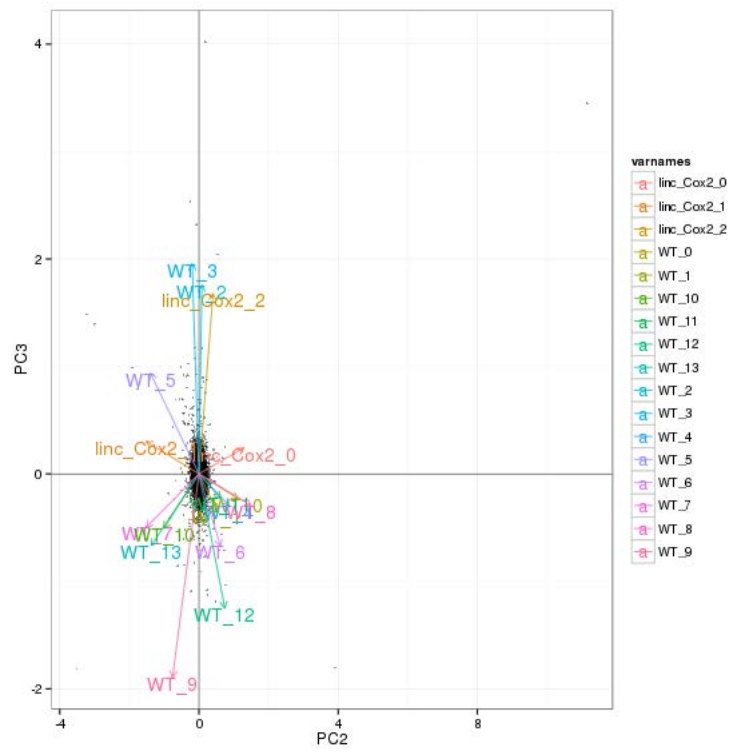

**MDS (genes)**

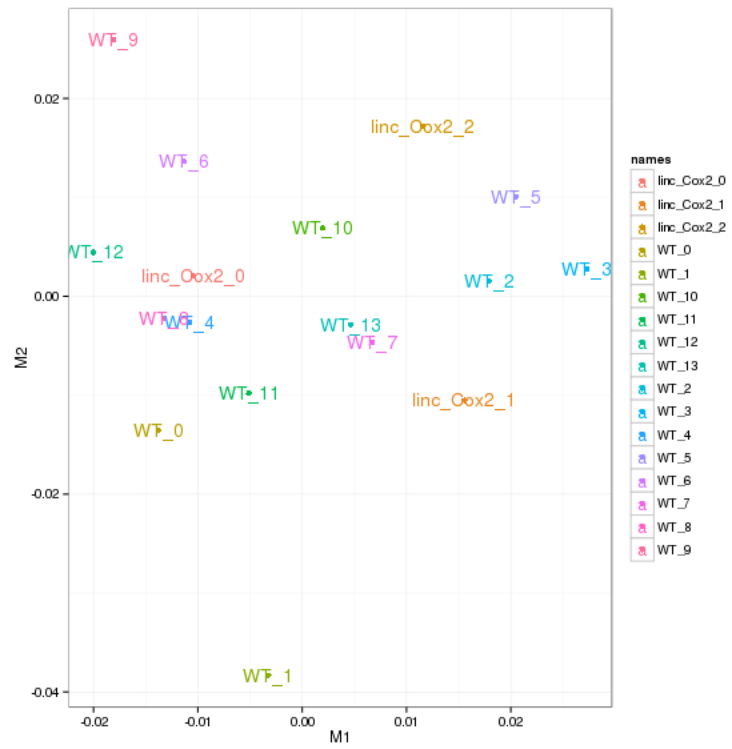

**KO assessment**  
**Endogenous lincRNA expression**

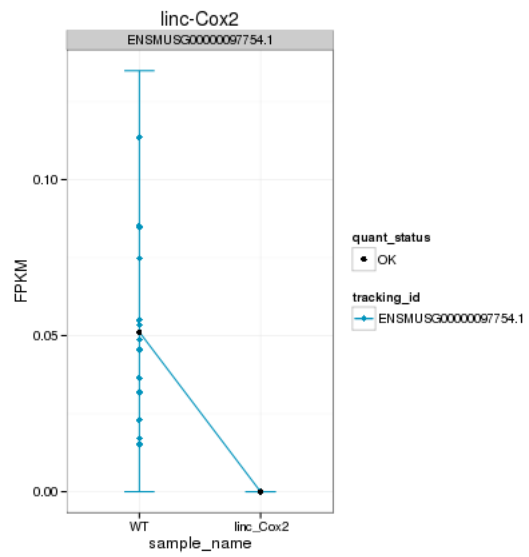

Endogenous expression of linc-Cox2 isoforms:

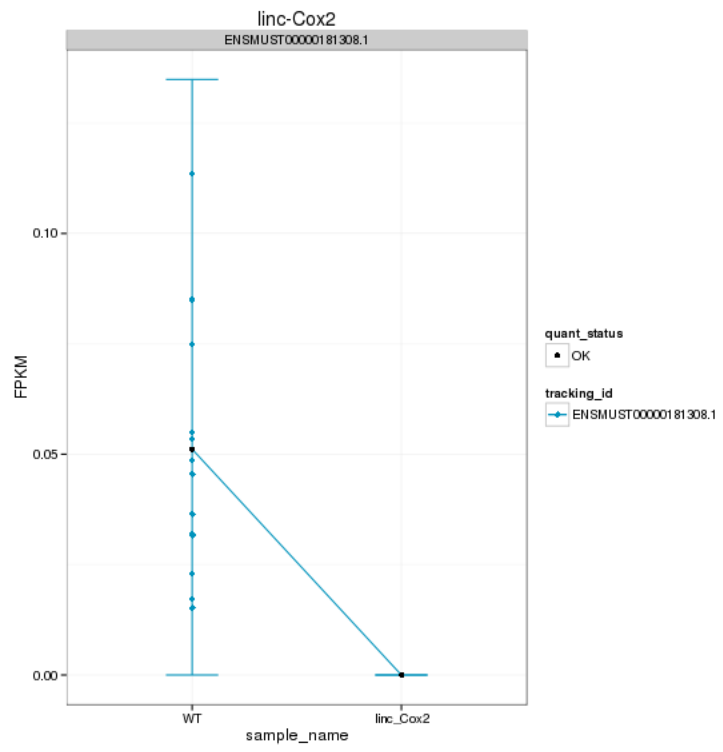

Barplot of gene expression:

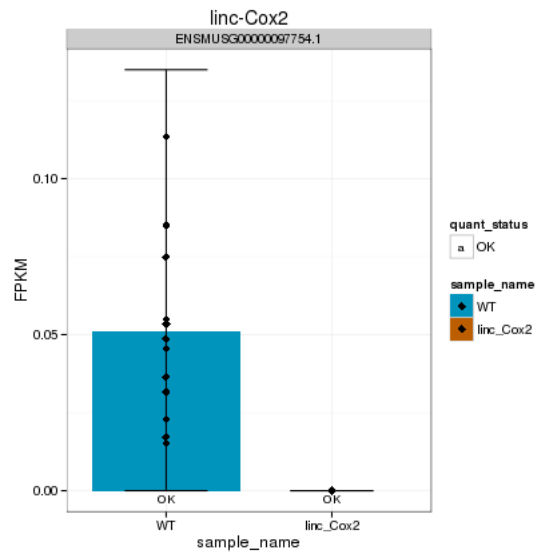

Barplot of isoform expression:

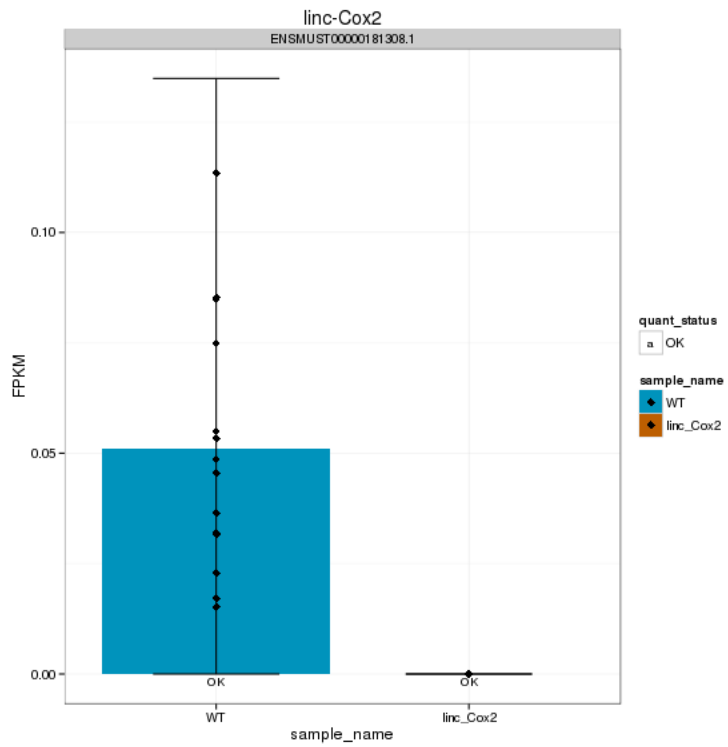

## LacZ expression

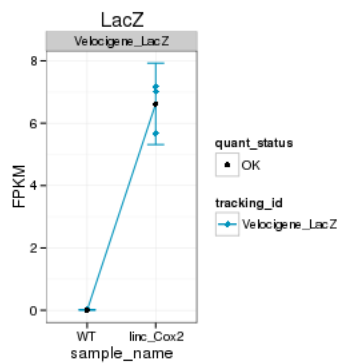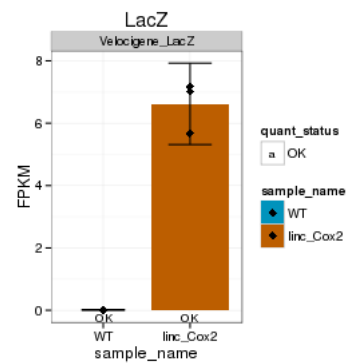

## Digital Genotyping (LacZ vs Endogenous lincRNA and Sex)

Eif2s3y is a y-expressed gene, Xist is an x-expressed gene Expression plot (endogenous linc, lacZ, Y-expressed gene):



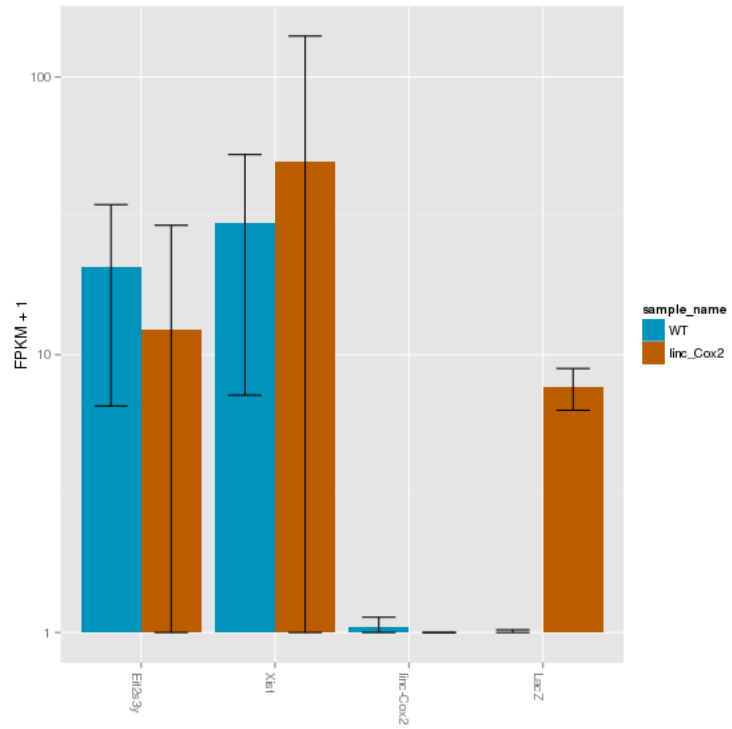

Expression heatmap:

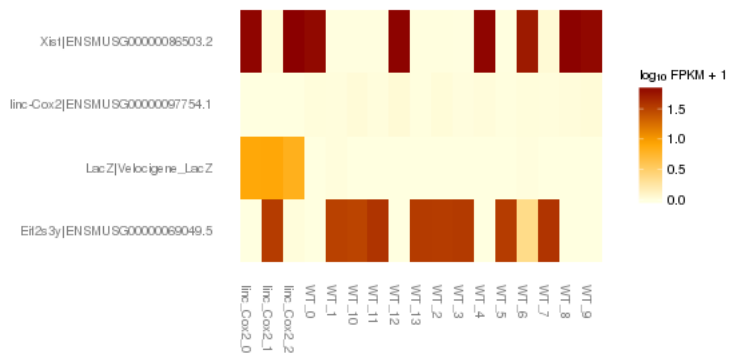

Track visualization

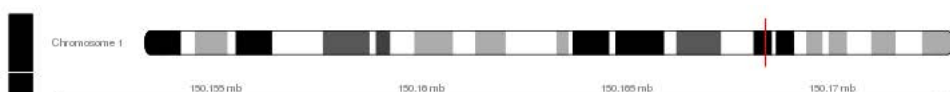

NO Region | line\_Coord\_1 | line\_Coord\_2 | line\_Coord\_3 | WT\_0 | WT\_1 | WT\_2 | WT\_3 | WT\_4 | WT\_5 | WT\_6 | WT\_7 | WT\_8 | WT\_9 | WT\_10 | WT\_11 | WT\_12 | WT\_13

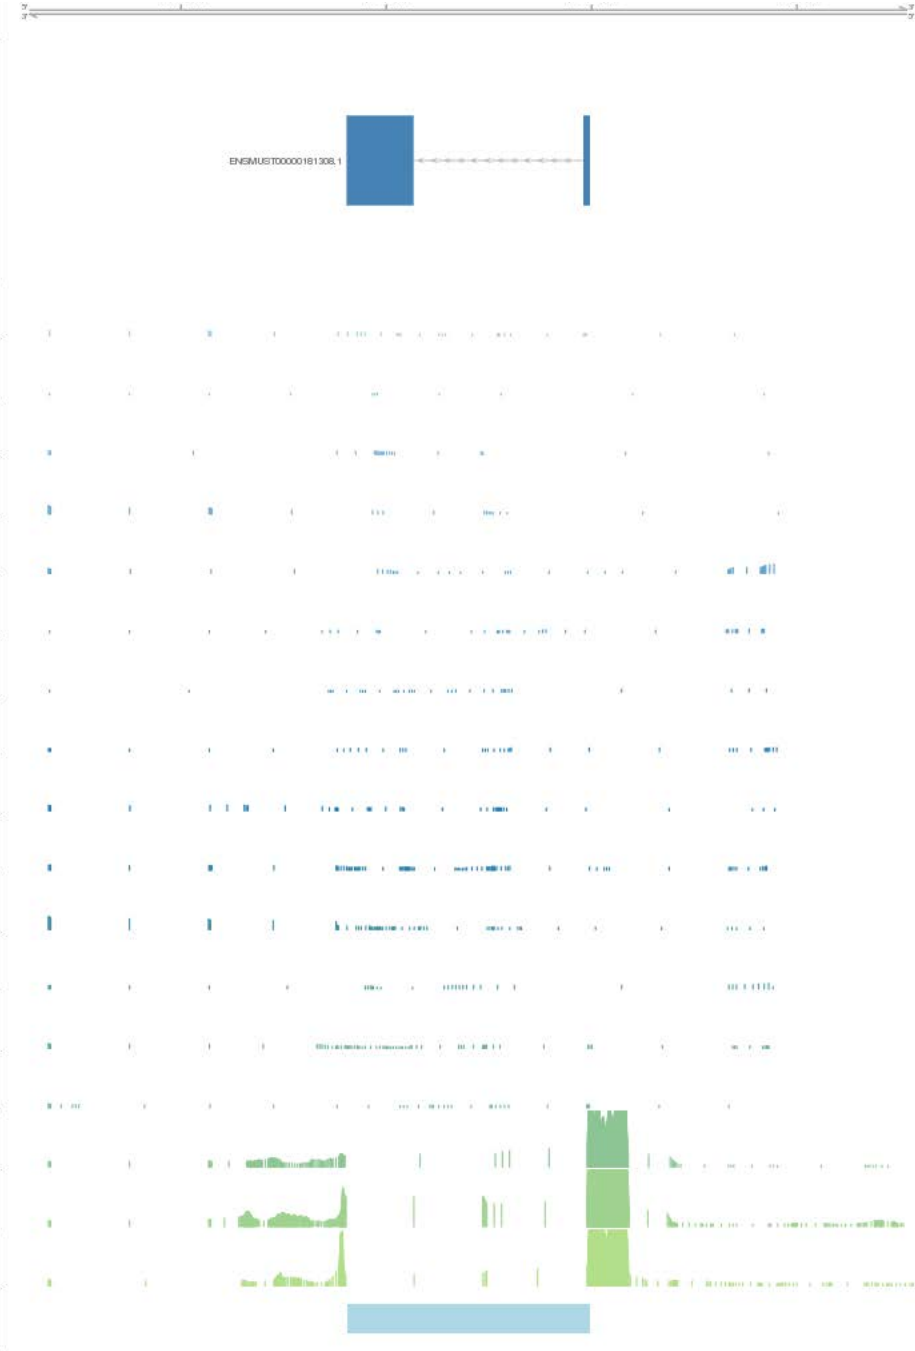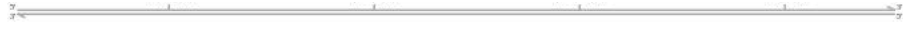

# Differential Analysis

## Differential Genes

There are 94 significantly differentially expressed genes. They are:

```
geneAnnot$gene_short_name
1 Tubb6
2 Folh1
3 Nes
4 Epha2
5 Nav1
6 Vtn
7 Fabp7
8 Adi1
9 Serpina3n
10 Fos
11 Emp2
12 Arc
13 Sdf2l1
14 Nr4a1
15 Cdkn1a
16 Park2
17 Glo1
18 Prss41
19 Atp6v0c
20 Eci1
21 Lars
22 Camk2a
23 Cnksr2
24 Mcm6
25 Dbi
26 Tnni1
27 Lamc2
28 Rgs5
29 Myoc
30 Lypd6b
31 Lcn2
32 Hspa5
33 Olfm13
34 Rps3a1
35 Nr4a3
36 Tinagl1
37 Padi2
```

38 Hes3  
39 Fbxo44  
40 Fosl2  
41 Gkn3  
42 Hddc3  
43 Col4a1  
  
44 Ptgs2  
45 Ndn  
46 Arhgap27  
47 Rnps1  
48 Prr7  
49 Zranb3  
50 Arl5a  
51 Mgat5  
52 Decr2  
53 Psenen  
54 Egr1  
55 Akap12  
56 Pcsk1n  
57 Trub2  
58 Fmo2  
59 Slc25a34  
60 Cldn5  
61 Gucy1a2  
62 Kif21b  
63 Shisa4  
64 Maff  
65 Id1  
66 Acp1  
67 4930503L19Rik  
68 Pcdhb3  
69 Olfml2a  
70 Tnrc6b  
  
71 Lmod1  
72 Tagap1  
73 Aldh7a1  
74 Per2  
75 S100a9  
76 Kcnq3  
77 Pign  
78 Kdm5d  
79 Tpm3-rs7  
80 Capn11

- 81 Gm5506
- 82 Pyroxd2
- 83 Eno1
- 84 Chi3l1
- 85 Clasp1
- 86 Ddx3y
- 87 Gm7292
- 88 Wdfy1
- 89 Apold1
- 90 Hspa1b
- 91 Scnm1
- 92 AA465934
- 93 Gm10524
- 94 RP24-390G17.1

### Matrix of gene significant differences between conditions

(skip for Brainmap wt-v-ko comparisons)

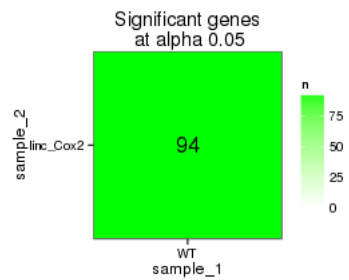

### Significant gene expression differences between conditions

Expression plot (genes):(turned off)

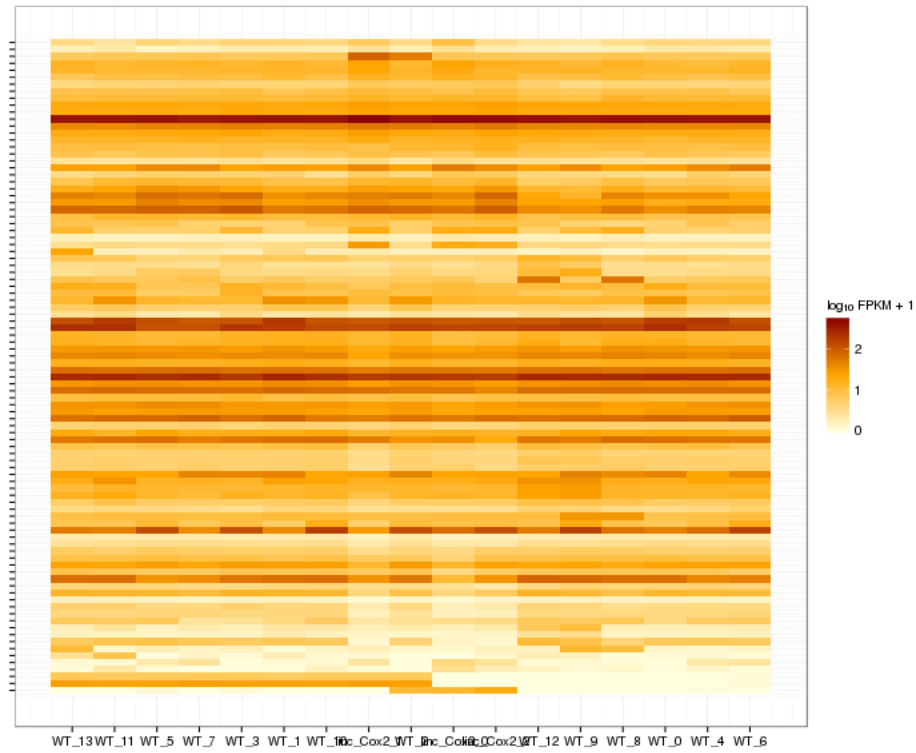

Significant genes with expression >50fpm (any condition):(turned off)

An individual look at each of the highly expressed significantly differentially regulated genes: (eval=false for first pass)

### Expression-level/significance relationship

Scatter plot of significant genes only:

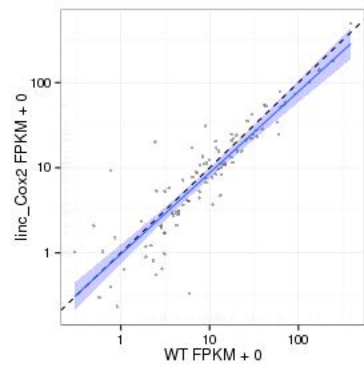

### Volcano Plot

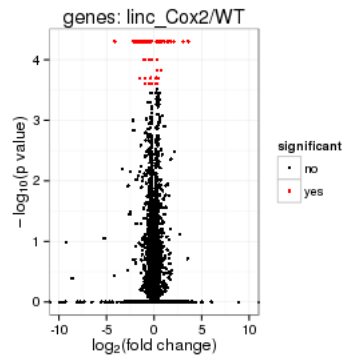

### Volcano plot with significant genes only:

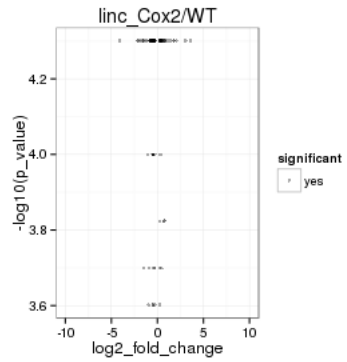

### FoldChange Heatmap

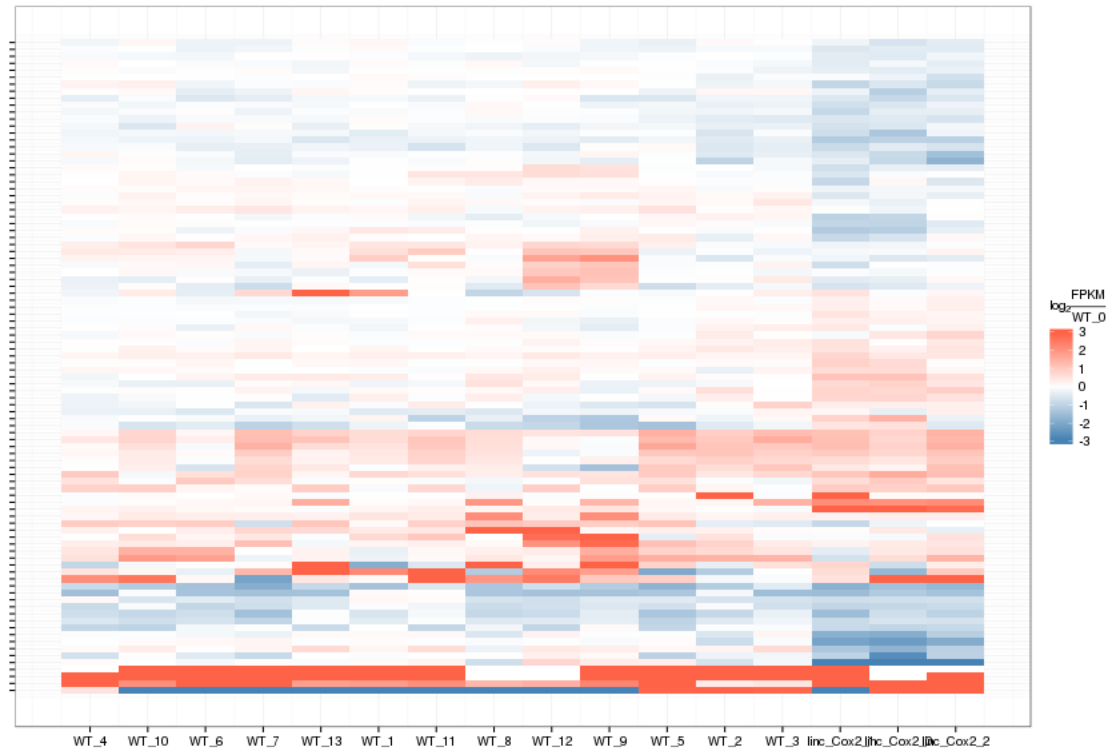

## Differential Splicing

### Differential Isoforms between conditions

Per isoform difference between conditions:

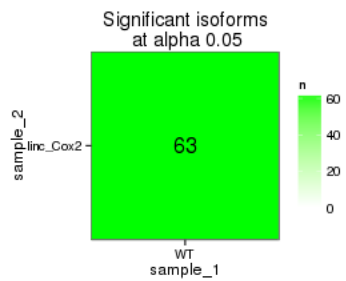



These isoforms are:

| <b>isoAnnot</b> | <b>gene_short_name</b> |
|-----------------|------------------------|
| 1               | Tubb6                  |
| 2               | Rec8                   |
| 3               | Nes                    |
| 4               | Vtn                    |
| 5               | Fabp7                  |
| 6               | Serpina3n              |
| 7               | Fos                    |
| 8               | Emp2                   |
| 9               | Arc                    |
| 10              | Sdf2l1                 |
| 11              | Nr4a1                  |
| 12              | Cdkn1a                 |
| 13              | Glo1                   |
| 14              | Atp6v0c                |
| 15              | Eci1                   |
| 16              | Lars                   |
| 17              | Cdh7                   |
| 18              | Mcm6                   |
| 19              | Dbi                    |
| 20              | Lamc2                  |
| 21              | Rgs5                   |
| 22              | Myoc                   |
| 23              | Lypd6b                 |
| 24              | Olfml3                 |
| 25              | Tpm3                   |
| 26              | Rps3a1                 |
| 27              | Arhgef19               |
| 28              | Padi2                  |
| 29              | Hes3                   |
| 30              | Fosl2                  |
| 31              | Gkn3                   |
| 32              | Hddc3                  |
| 33              | Ptgs2                  |
| 34              | Ndn                    |
| 35              | Rnps1                  |
| 36              | Arl5a                  |
| 37              | Decr2                  |
| 38              | Egr1                   |
| 39              | Akap12                 |
| 40              | Pcsk1n                 |

41 Cercam  
42 Trub2  
43 Fmo2  
44 Zfp236  
45 Cldn5  
46 Kif21b  
47 Pm20d1  
48 Olfm12a  
49 Tagap1  
50 Per2  
51 Kcnq3  
52 Kdm5d  
53 Tpm3-rs7  
54 Capn11  
55 Gm5506  
56 Ddx3y  
57 Gm7292  
58 Wdfy1  
59 Apold1  
60 Hspa1b  
61 Ptpv

Gene-level DE isoform heatmap

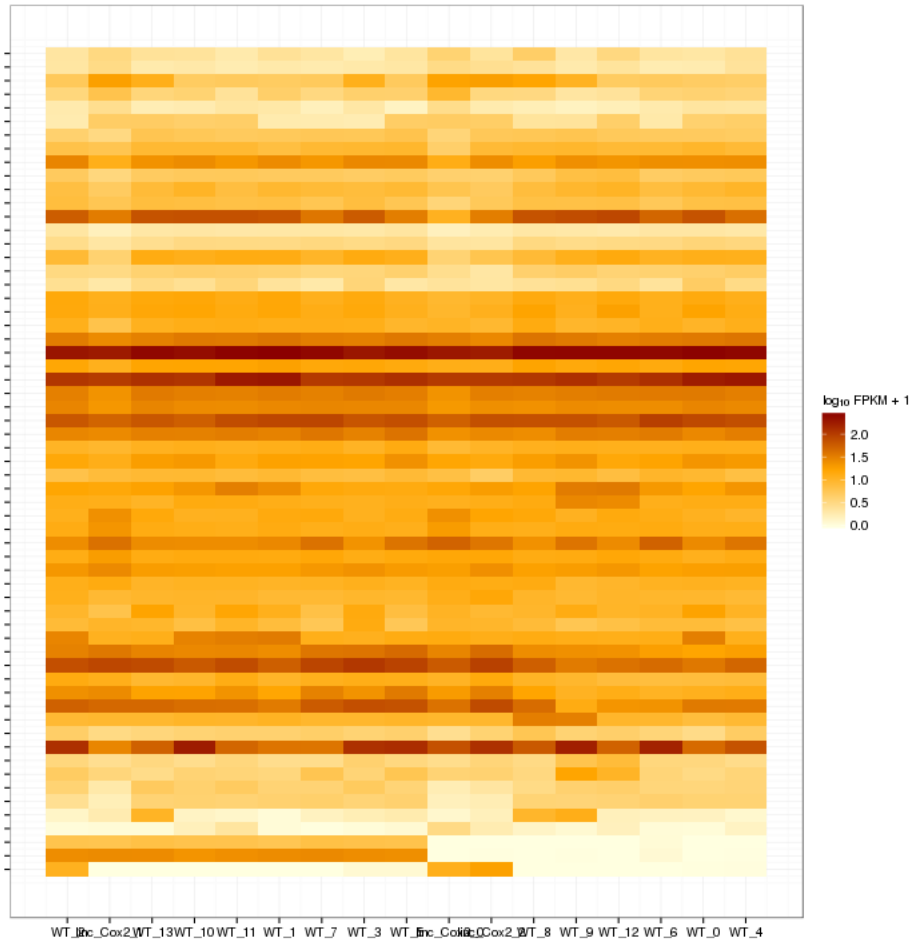

Isoform foldchange heatmap by isoform:

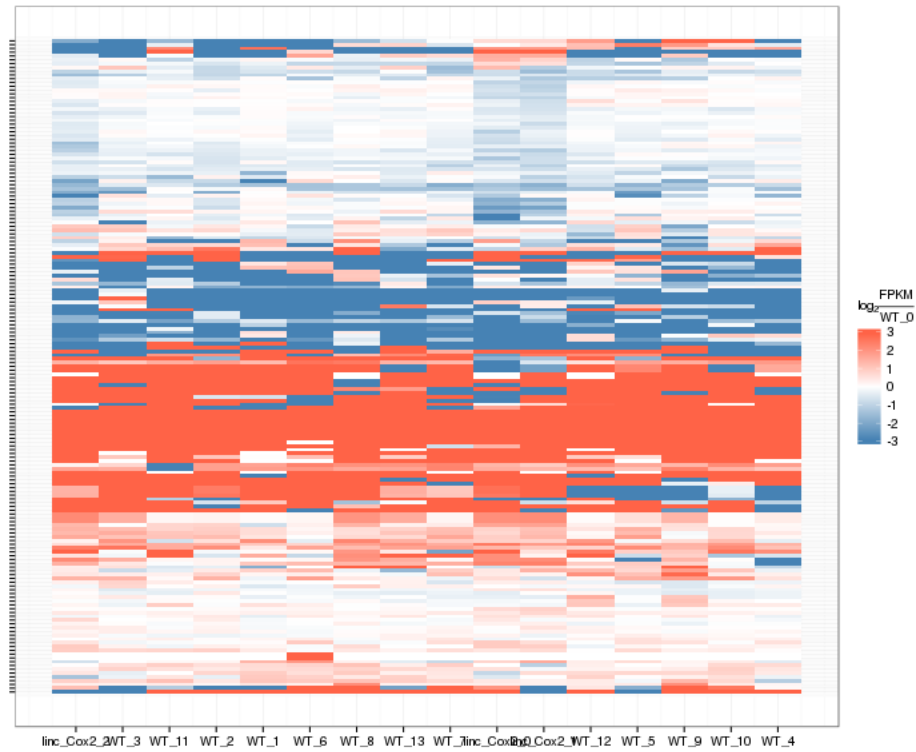

## Differential Splicing between conditions

(eval false for first pass)

Per condition differences in isoforms (Does gene have diff piechart between conditions?)

These genes are:

Splicing heatmap by isoform:

Splicing heatmap by gene

The following are significantly differentially spliced genes (relative portion of isoform per condition):

## Gene/Pathway Analysis

### GSEA

Enrichment and zscores are calculated based on expression in KO vs WT (fpkmKO/fpkmWT), so genes that are down regulated in KO are shown in blue, while upregulation is shown in red.

KOWT Blue = down in KO Red = Up in KO

Biocarta enrichment:

```
## [1] "Not enough significant categories to print a heatmap!"
```

Biocarta zscore:

```
## [1] "Not enough significant categories to print a heatmap!"
```

Reactome enrichment:

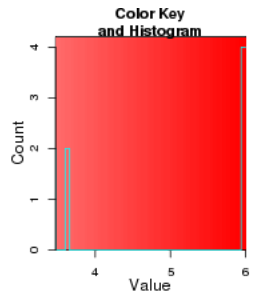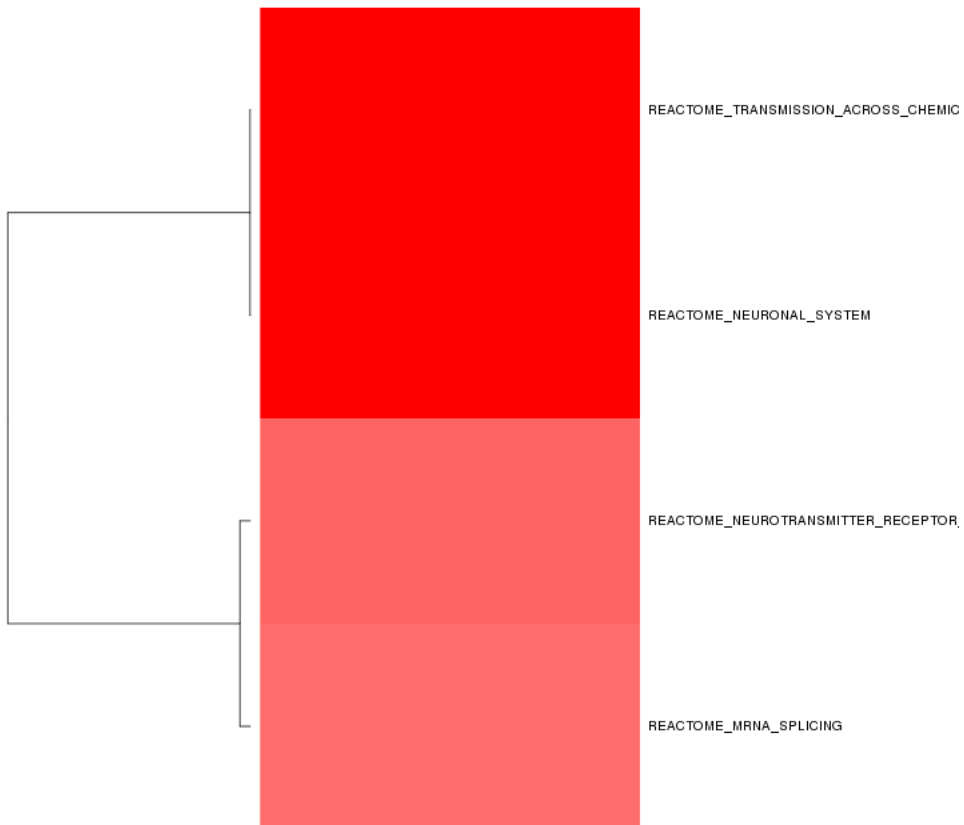

Reactome zscore:

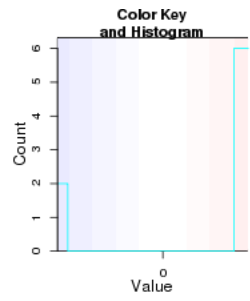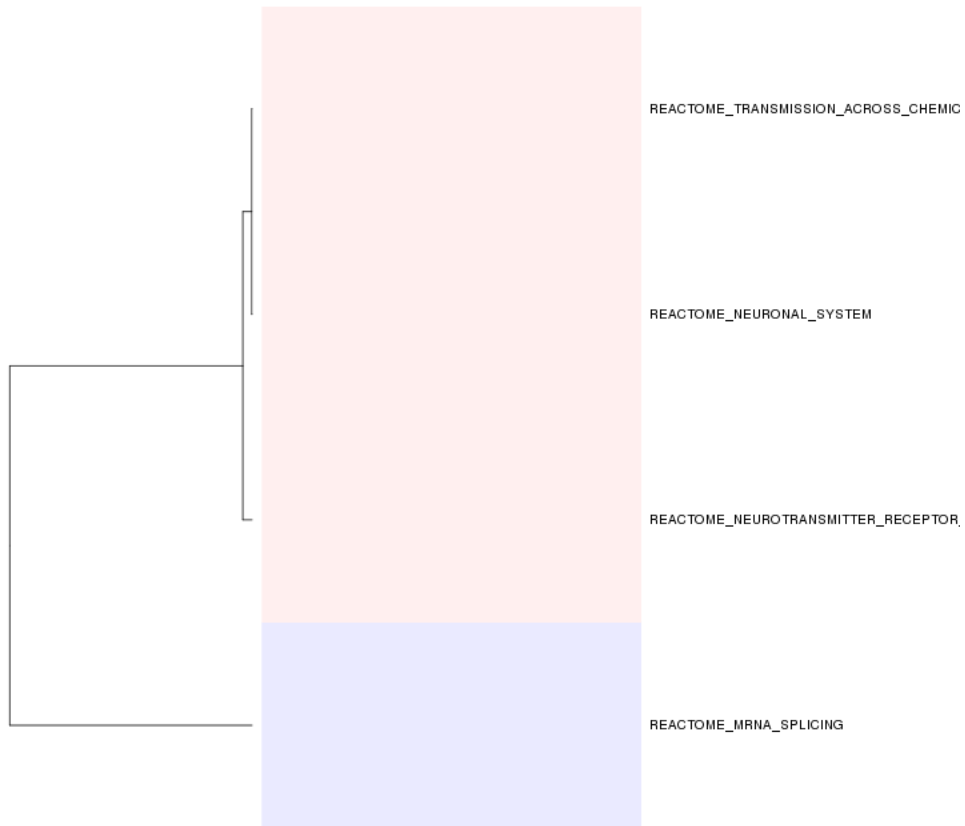

Kegg enrichment:

```
## Error: argument is of length zero
```

Kegg zscore:

```
## Error: incorrect number of dimensions
```

```
## Error: object 'x_ordered' not found
```

```
## Error: error in evaluating the argument 'x' in selecting a method for function 'as.matrix': Error: object 'x_ordered' not found
```

```
## Error: object 'x_ordered' not found
```

Interneuron enrichment:

```
## Error: argument is of length zero
```

Interneuron zscore:

```
## Error: incorrect number of dimensions
```

```
## Error: object 'x_ordered' not found
```

```
## Error: error in evaluating the argument 'x' in selecting a method for function 'as.matrix': Error: object 'x_ordered' not found
```

```
## Error: object 'x_ordered' not found
```

Oncogene enrichment:

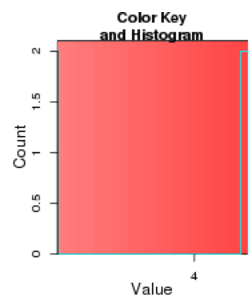

\_\_\_\_\_

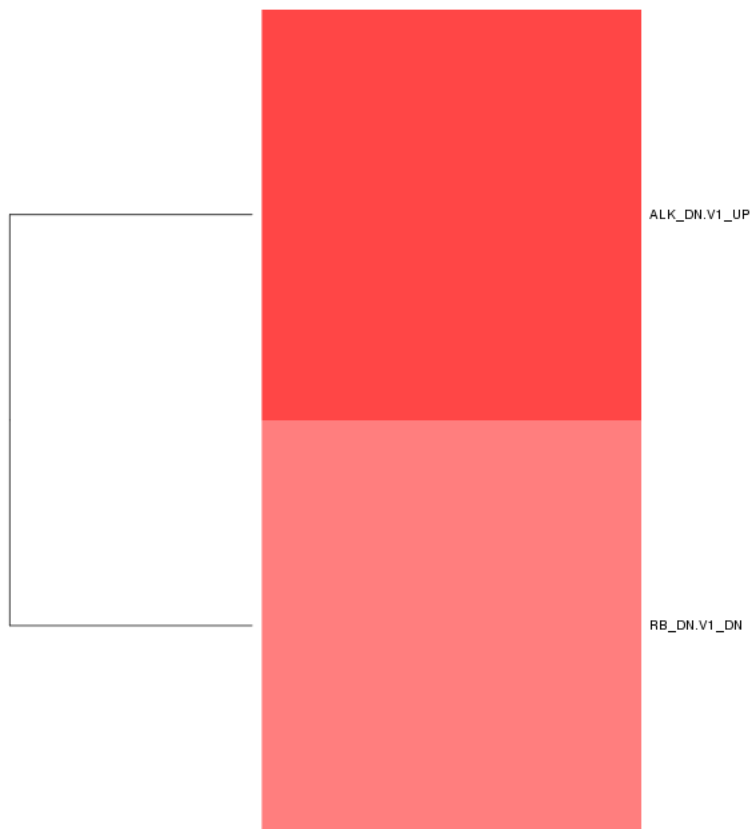

Oncogene zscore:



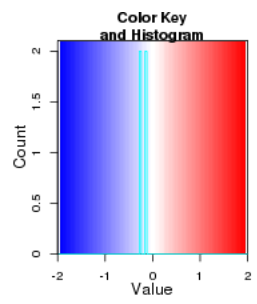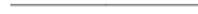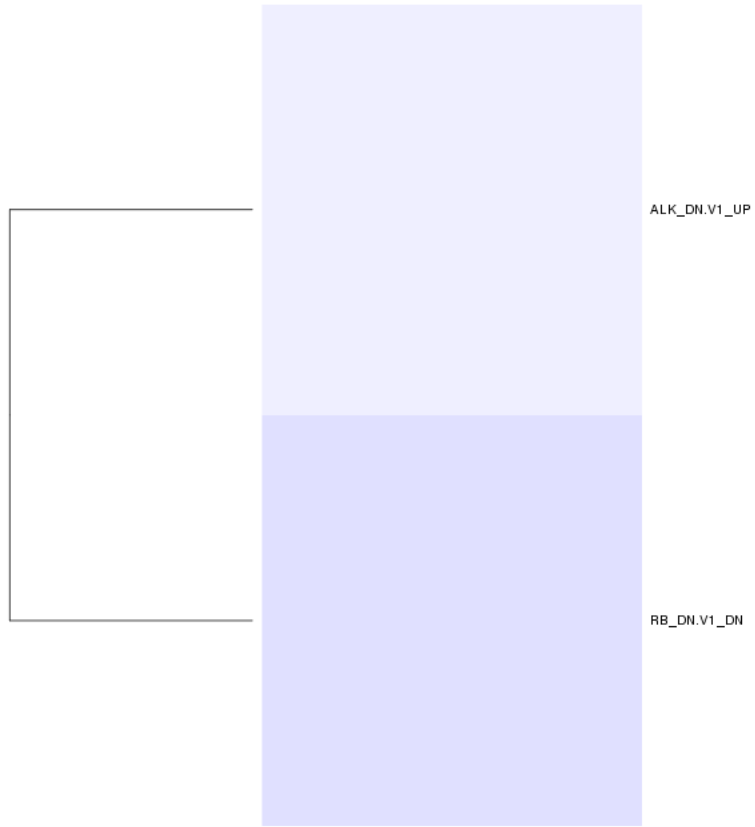

Immuno enrichment:

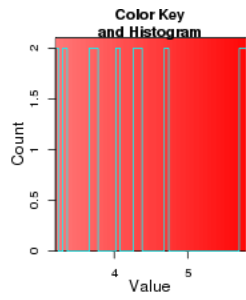

\_\_\_\_\_

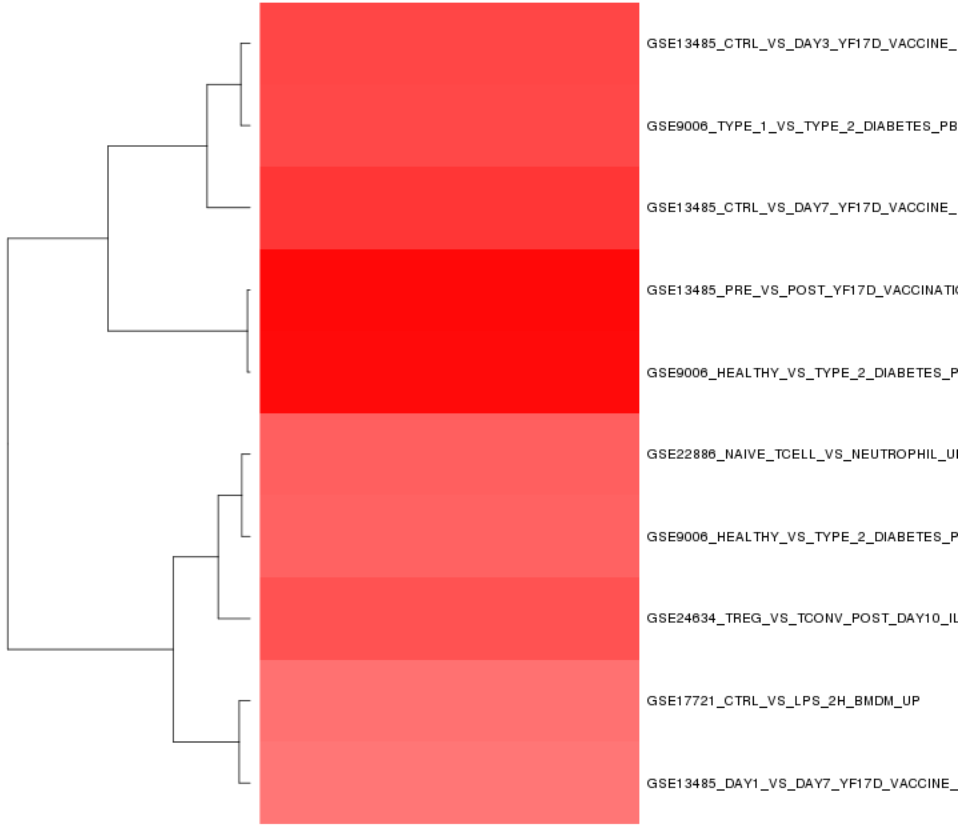

Immuno zscore:

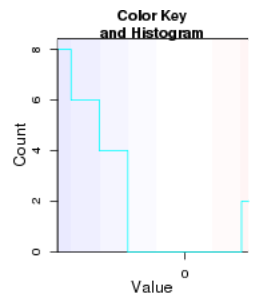

\_\_\_\_\_

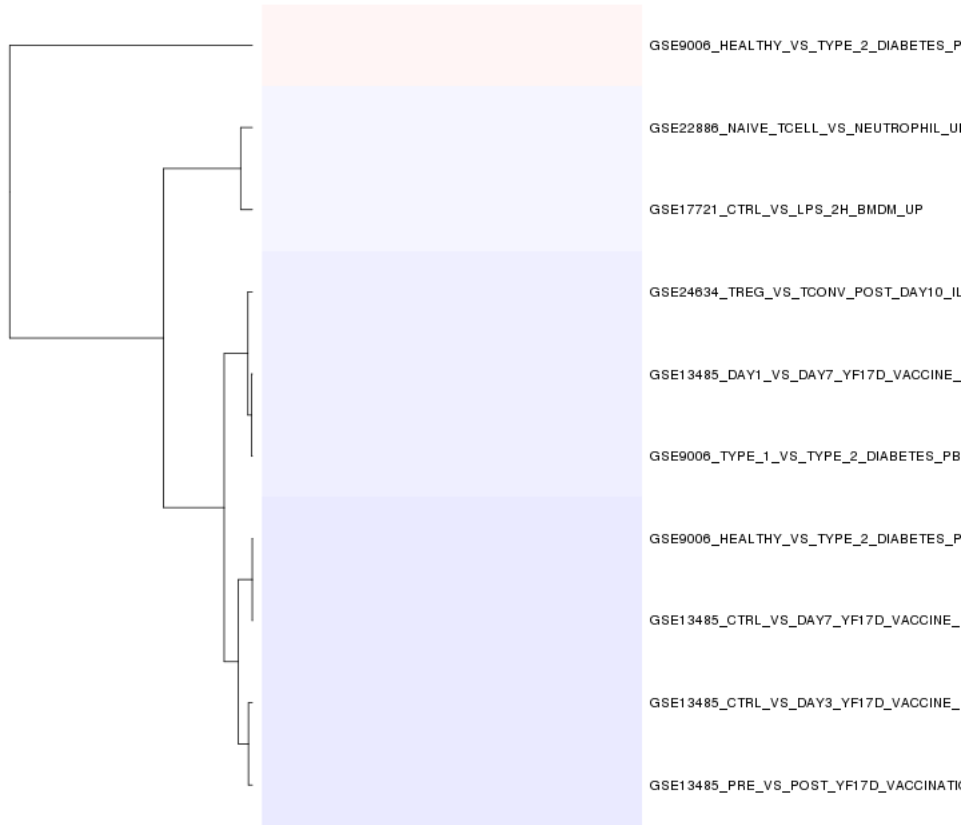

TF enrichment:

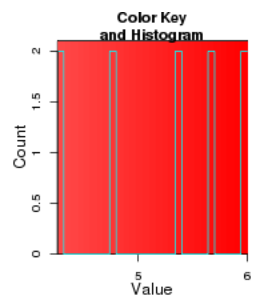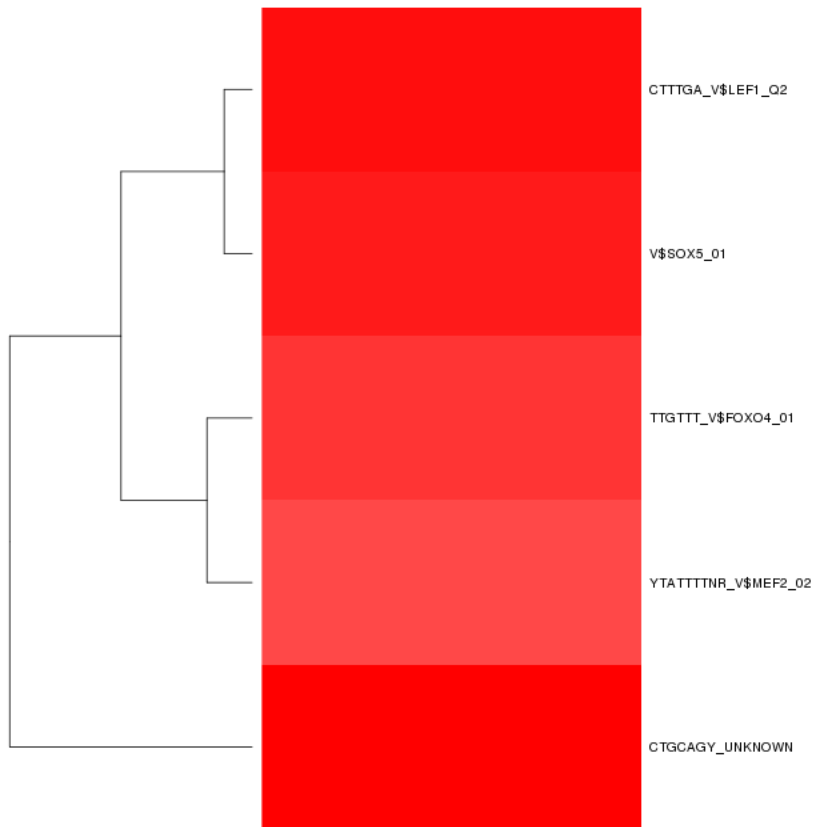

TF zscore:

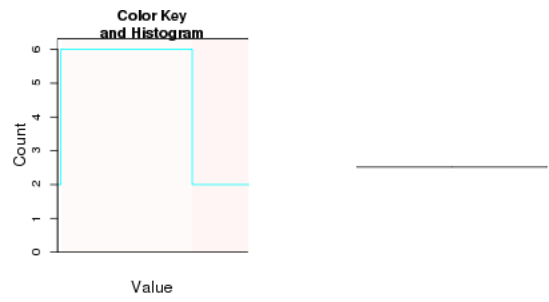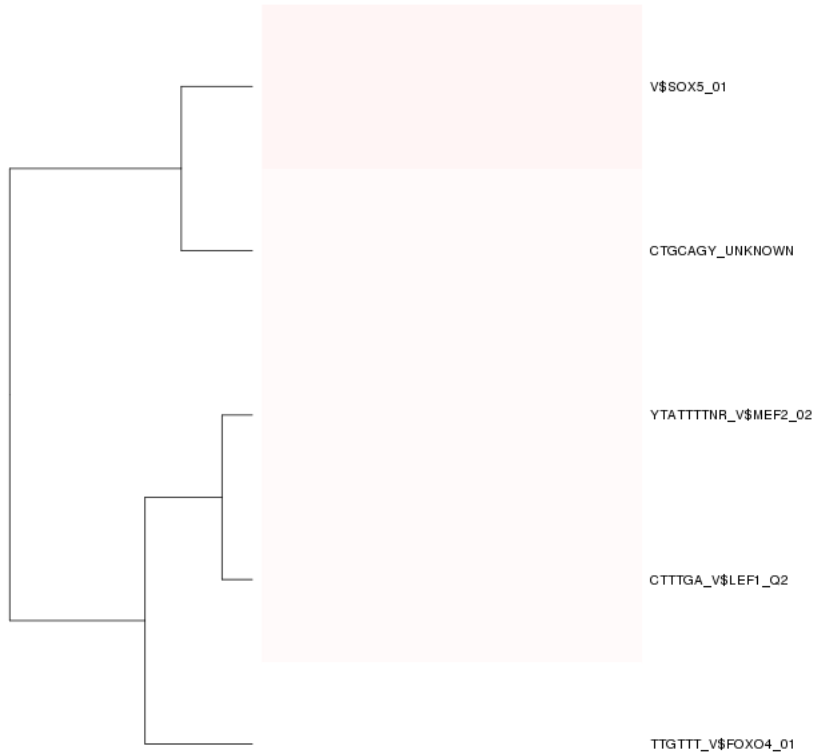

## GO enrichment

Cluster profiler used to call enrichments of significantly differentially regulated genes that map to Entrez IDs.

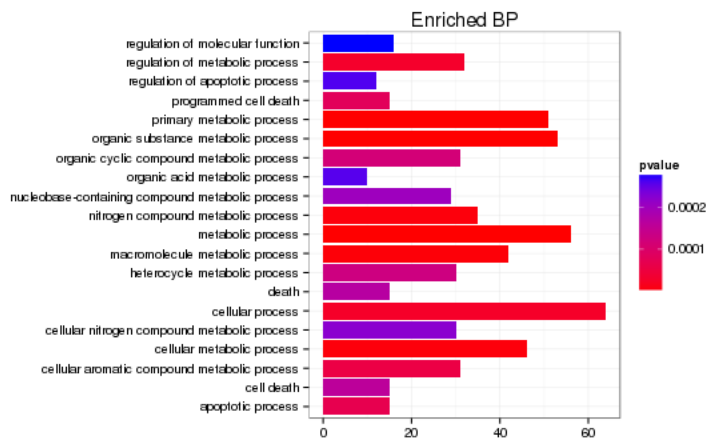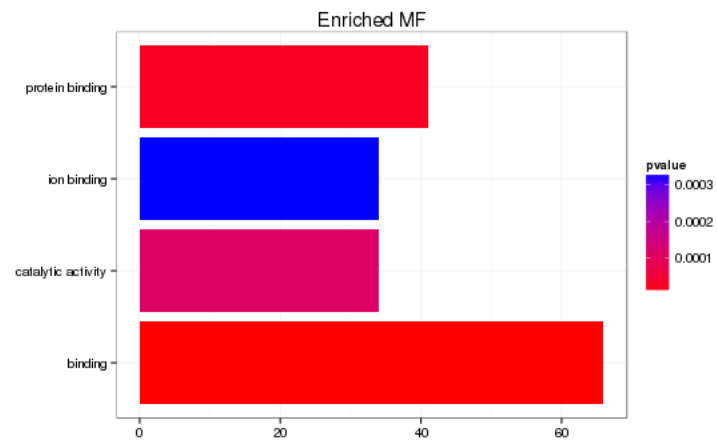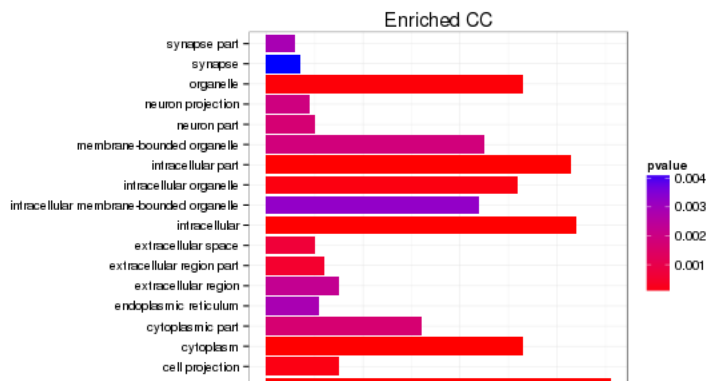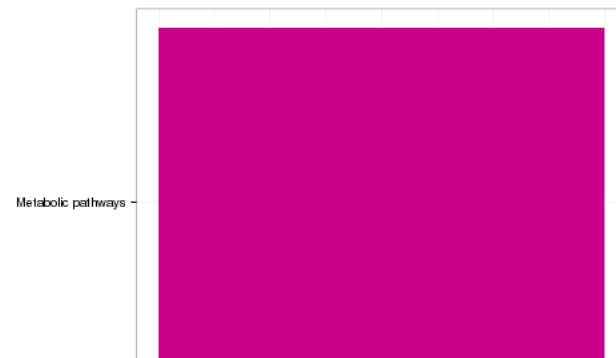

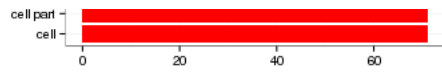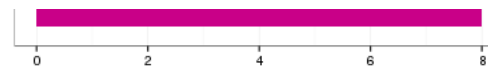

```
## Error: 'x' and 'units' must have length > 0
```

## Enrichment or depletion for stage-specific cell cycle markers





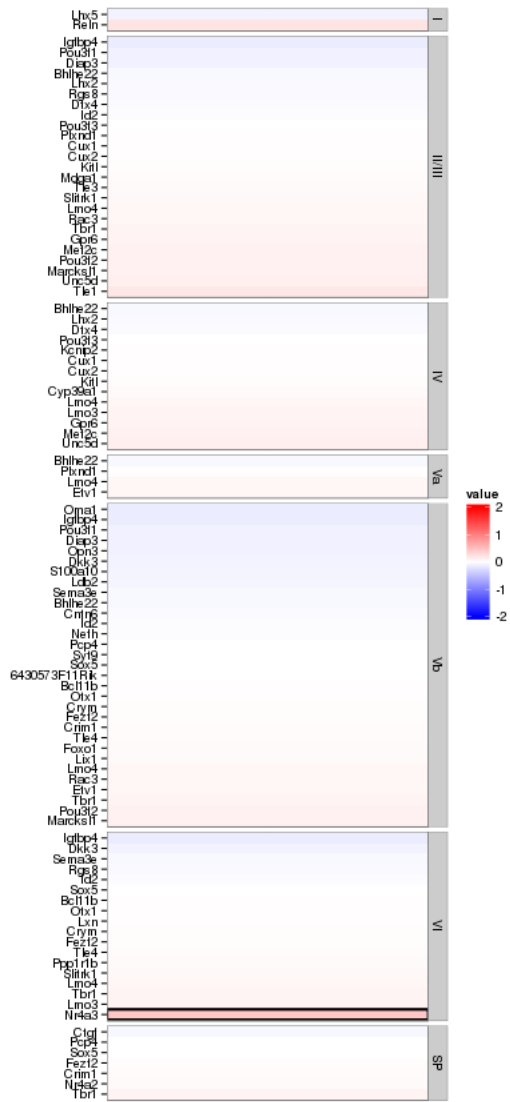

Enrichment or depletion for specific neural cell types

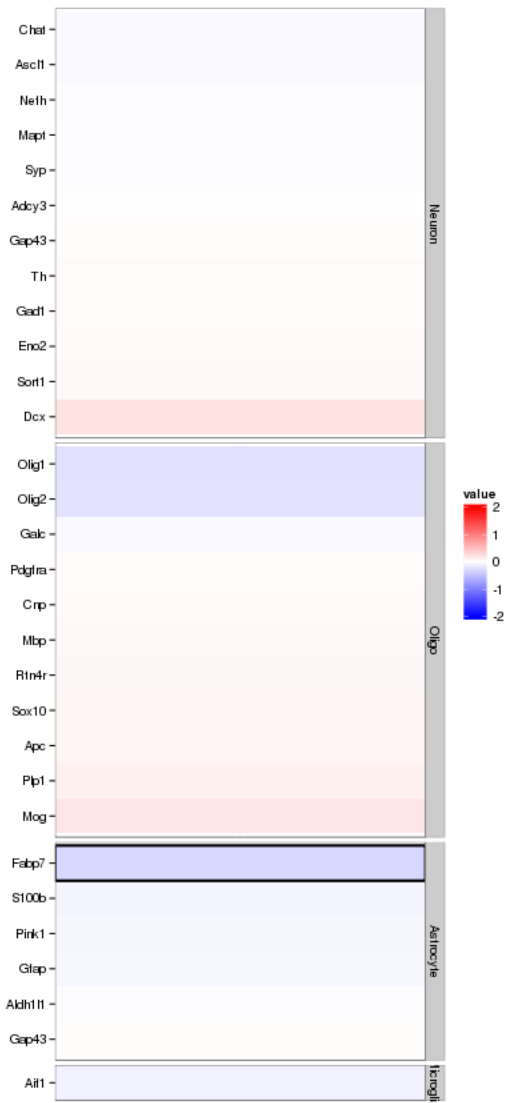

**Enrichment or Depletion of neural differentiation markers**

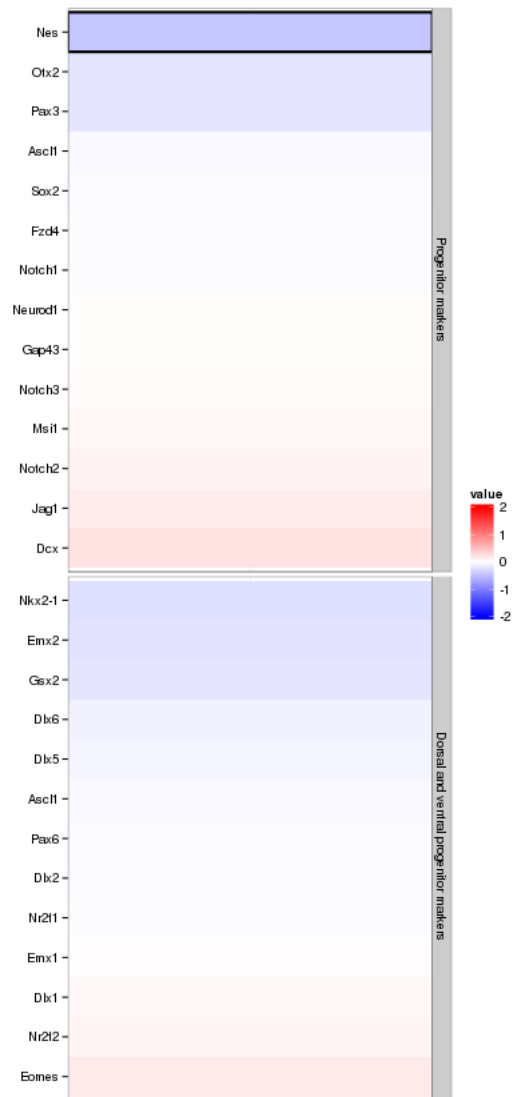

## Cis vs Trans (locally)

$\log_2$  Foldchange and test statistic are calculated with the ratio of  $\text{fpm(KO)}/\text{fpm(WT)}$ , thus the test\_stat is positive if a gene is higher in the KO and negative if a gene has lower expression in the KO

The pvalue for 1 genes significantly regulated in a region this size is: 0.1821

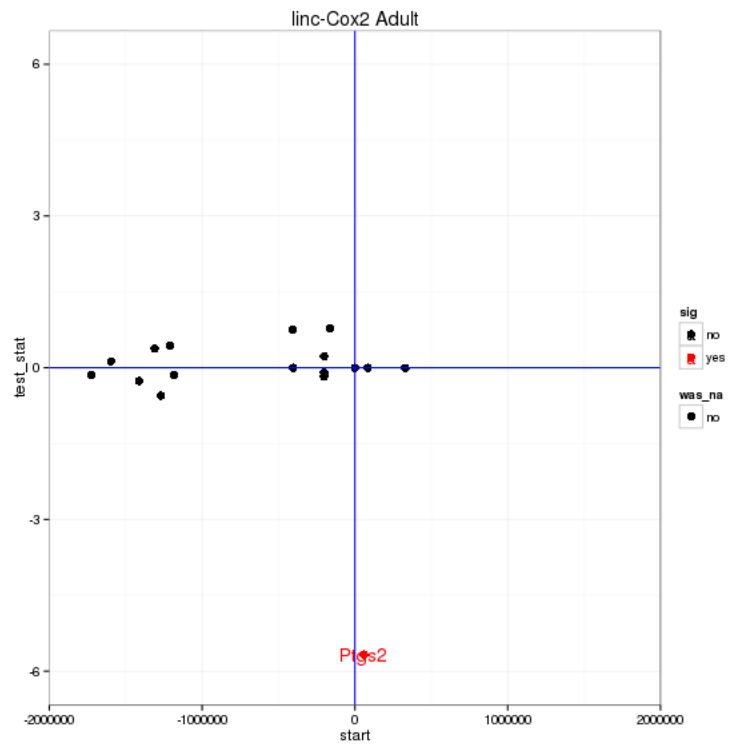

## Notes

Samples used are:

10

- 1 JR729
- 2 JR728
- 3 JR796
- 4 JR797
- 5 JR740
- 6 JR800
- 7 JR827
- 8 JR778
- 9 JR734
- 10 JR802
- 11 JR803
- 12 JR735
- 13 JR785
- 14 JR781

15 JR732  
16 JR776  
17 JR798

## Replicates

| file                                                                          | sample_name | replicate | rep_name    | total_mass  | norm_mass   | internal_scale | external_scale |
|-------------------------------------------------------------------------------|-------------|-----------|-------------|-------------|-------------|----------------|----------------|
| 1 /n/rinn_data1/seq/fgoff/Projects/BrainMap/data/quants/JR729/abundances.cxb  | WT          | 0         | WT_0        | 26334400.00 | 34095400.00 | 0.77           | 1.00           |
| 2 /n/rinn_data1/seq/fgoff/Projects/BrainMap/data/quants/JR728/abundances.cxb  | WT          | 1         | WT_1        | 20329200.00 | 34095400.00 | 0.59           | 1.00           |
| 3 /n/rinn_data1/seq/fgoff/Projects/BrainMap/data/quants/JR796/abundances.cxb  | WT          | 2         | WT_2        | 34089000.00 | 34095400.00 | 1.00           | 1.00           |
| 4 /n/rinn_data1/seq/fgoff/Projects/BrainMap/data/quants/JR797/abundances.cxb  | WT          | 3         | WT_3        | 28103300.00 | 34095400.00 | 0.82           | 1.00           |
| 5 /n/rinn_data1/seq/fgoff/Projects/BrainMap/data/quants/JR740/abundances.cxb  | WT          | 4         | WT_4        | 35808200.00 | 34095400.00 | 1.05           | 1.00           |
| 6 /n/rinn_data1/seq/fgoff/Projects/BrainMap/data/quants/JR800/abundances.cxb  | WT          | 5         | WT_5        | 37012200.00 | 34095400.00 | 1.09           | 1.00           |
| 7 /n/rinn_data1/seq/fgoff/Projects/BrainMap/data/quants/JR827/abundances.cxb  | WT          | 6         | WT_6        | 27786600.00 | 34095400.00 | 0.82           | 1.00           |
| 8 /n/rinn_data1/seq/fgoff/Projects/BrainMap/data/quants/JR778/abundances.cxb  | WT          | 7         | WT_7        | 39541900.00 | 34095400.00 | 1.18           | 1.00           |
| 9 /n/rinn_data1/seq/fgoff/Projects/BrainMap/data/quants/JR734/abundances.cxb  | WT          | 8         | WT_8        | 34480600.00 | 34095400.00 | 1.03           | 1.00           |
| 10 /n/rinn_data1/seq/fgoff/Projects/BrainMap/data/quants/JR802/abundances.cxb | WT          | 9         | WT_9        | 45467400.00 | 34095400.00 | 1.32           | 1.00           |
| 11 /n/rinn_data1/seq/fgoff/Projects/BrainMap/data/quants/JR803/abundances.cxb | WT          | 10        | WT_10       | 52130400.00 | 34095400.00 | 1.53           | 1.00           |
| 12 /n/rinn_data1/seq/fgoff/Projects/BrainMap/data/quants/JR735/abundances.cxb | WT          | 11        | WT_11       | 34994400.00 | 34095400.00 | 1.03           | 1.00           |
| 13 /n/rinn_data1/seq/fgoff/Projects/BrainMap/data/quants/JR785/abundances.cxb | WT          | 12        | WT_12       | 34173600.00 | 34095400.00 | 0.99           | 1.00           |
| 14 /n/rinn_data1/seq/fgoff/Projects/BrainMap/data/quants/JR781/abundances.cxb | WT          | 13        | WT_13       | 41538900.00 | 34095400.00 | 1.23           | 1.00           |
| 15 /n/rinn_data1/seq/fgoff/Projects/BrainMap/data/quants/JR732/abundances.cxb | linc_Cox2   | 0         | linc_Cox2_0 | 27439100.00 | 34095400.00 | 0.81           | 1.00           |
| 16 /n/rinn_data1/seq/fgoff/Projects/BrainMap/data/quants/JR776/abundances.cxb | linc_Cox2   | 1         | linc_Cox2_1 | 39517800.00 | 34095400.00 | 1.14           | 1.00           |
| 17 /n/rinn_data1/seq/fgoff/Projects/BrainMap/data/quants/JR798/abundances.cxb | linc_Cox2   | 2         | linc_Cox2_2 | 35636800.00 | 34095400.00 | 1.03           | 1.00           |

## Session Info

```
## R version 3.0.2 (2013-09-25)
## Platform: x86_64-unknown-linux-gnu (64-bit)
##
## locale:
## [1] LC_CTYPE=en_US.UTF-8      LC_NUMERIC=C
## [3] LC_TIME=en_US.UTF-8      LC_COLLATE=en_US.UTF-8
## [5] LC_MONETARY=en_US.UTF-8  LC_MESSAGES=en_US.UTF-8
## [7] LC_PAPER=en_US.UTF-8     LC_NAME=C
## [9] LC_ADDRESS=C             LC_TELEPHONE=C
## [11] LC_MEASUREMENT=en_US.UTF-8 LC_IDENTIFICATION=C
##
## attached base packages:
## [1] grid      parallel  methods  stats    graphics  grDevices  utils
## [8] datasets  base
##
## other attached packages:
## [1] plyr_1.8.1
## [2] stringr_0.6.2
## [3] seqbias_1.10.0
```

```

## [4] BSgenome.Mmusculus.UCSC.mm10_1.3.19
## [5] BSgenome_1.30.0
## [6] Biostrings_2.30.1
## [7] gdata_2.13.3
## [8] GO.db_2.10.1
## [9] org.Mm.eg.db_2.10.1
## [10] clusterProfiler_1.13.1
## [11] DOSE_2.0.0
## [12] ReactomePA_1.6.1
## [13] AnnotationDbi_1.24.0
## [14] Biobase_2.22.0
## [15] mgcv_1.7-29
## [16] nlme_3.1-117
## [17] RMySQL_0.9-3
## [18] RColorBrewer_1.0-5
## [19] gridExtra_0.9.1
## [20] gtable_0.1.2
## [21] marray_1.40.0
## [22] gplots_2.13.0
## [23] GSA_1.03
## [24] limma_3.18.13
## [25] xtable_1.7-3
## [26] cummeRbund_2.7.2
## [27] Gviz_1.6.0
## [28] rtracklayer_1.22.7
## [29] GenomicRanges_1.14.4
## [30] XVector_0.2.0
## [31] IRanges_1.20.7
## [32] fastcluster_1.1.13
## [33] reshape2_1.4
## [34] ggplot2_1.0.0
## [35] RSQLite_0.11.4
## [36] DBI_0.2-7
## [37] BiocGenerics_0.8.0
## [38] knitr_1.6
##
## loaded via a namespace (and not attached):
## [1] biomaRt_2.18.0      biovizBase_1.10.8  bitops_1.0-6
## [4] caTools_1.17        cluster_1.15.2     colorspace_1.2-4
## [7] dichromat_2.0-0     digest_0.6.4       DO.db_2.7
## [10] evaluate_0.5.5      formatR_0.10       Formula_1.1-1
## [13] GenomicFeatures_1.14.5 GOSemSim_1.20.3    graph_1.40.1
## [16] graphite_1.8.1      gtools_3.4.1       Hmisc_3.14-4
## [19] igraph_0.7.1        KEGG.db_2.10.1     KernSmooth_2.23-12
## [22] labeling_0.2        lattice_0.20-29    latticeExtra_0.6-26
## [25] MASS_7.3-33         Matrix_1.1-3       munsell_0.4.2
## [28] org.Hs.eg.db_2.10.1 proto_0.3-10       qvalue_1.36.0
## [31] Rcpp_0.11.2         RCurl_1.95-4.1     reactome.db_1.46.1
## [34] Rsamtools_1.14.3    scales_0.2.4       splines_3.0.2
## [37] stats4_3.0.2        survival_2.37-7    tcltk_3.0.2
## [40] tools_3.0.2         XML_3.98-1.1       zlibbioc_1.8.0

```

## Run Info

```
##          param
## 1      cmd_line
## 2          version
## 3  SVN_revision
## 4  boost_version
## 5          genome
##
## 1 cuffdiff -p 10 -L WT,linc-Cox2 -o /n/rinn_data1/seq/lgoff/Projects/BrainMap/data/diffs/linc-Cox2_vs_WT_Adult /n/rinn_data1/seq/lgoff/Projects/BrainMap
## 2
## 3
## 4
## 5
```

# linc-Cox2 KO vs WT (Embryonic)

This file shows the wt-v-ko comparison for linc-Cox2.

Cuff overview:

```
## CuffSet instance with:  
## 2 samples  
## 26754 genes  
## 77524 isoforms  
## 0 TSS  
## 23066 CDS  
## 0 promoters  
## 0 splicing  
## 19954 relCDS
```

## QC

### Dispersion

Dispersion plot for genes in cuff: (Overdispersion can lead to innacurate quants)

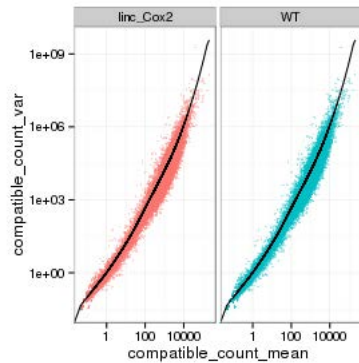

### Cross-replicate variability (fpkmSCVplot)

Differences in CV 2 can result in lower numbers of differentially expressed genes due to a higher degree of variability between replicate fpkm estimates.

Genes:



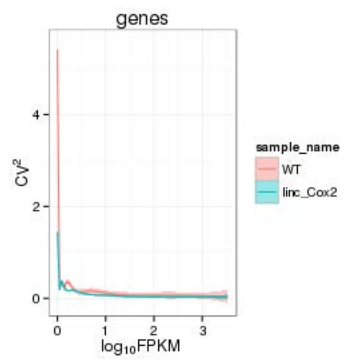

Isoforms:

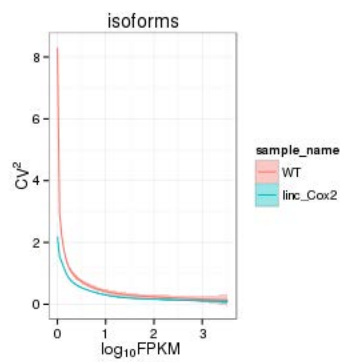

## MvA plot

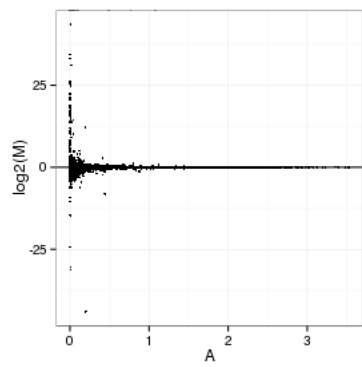

MvA plot counts

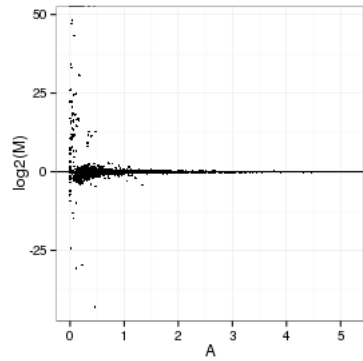

## Scatterplot matrix

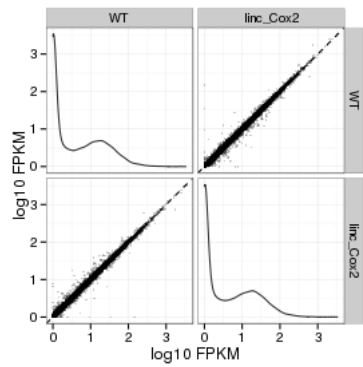

## Distributions

### Boxplots

Boxplot (genes)

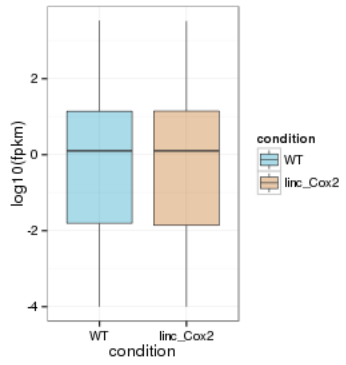

Boxplot (genes, replicates)

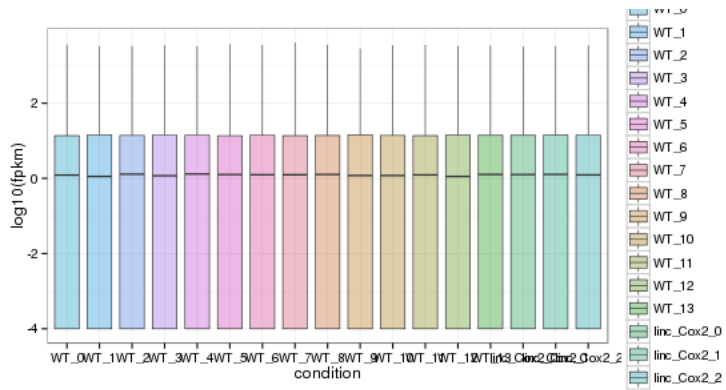

Boxplot (isoforms)

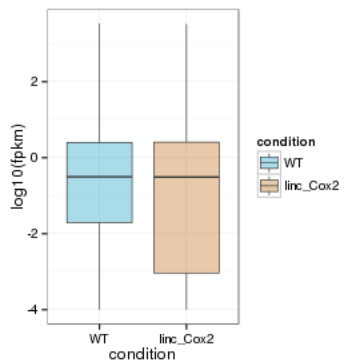

Boxplot (isoforms, replicates)

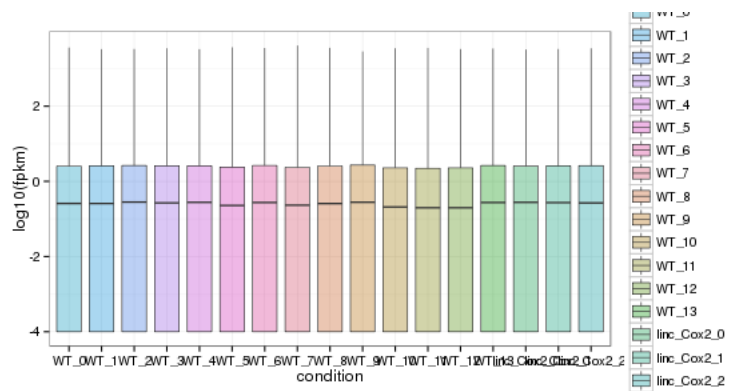

## Density

Density (genes)

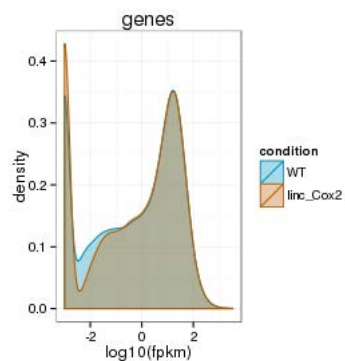

Density (genes, replicates)

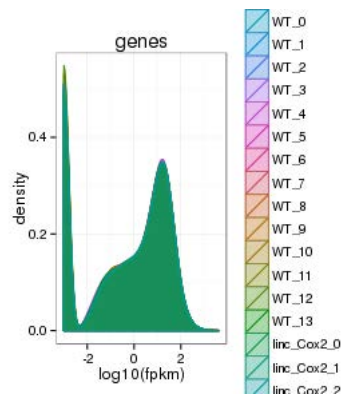

# Clustering

## Replicate Clusters

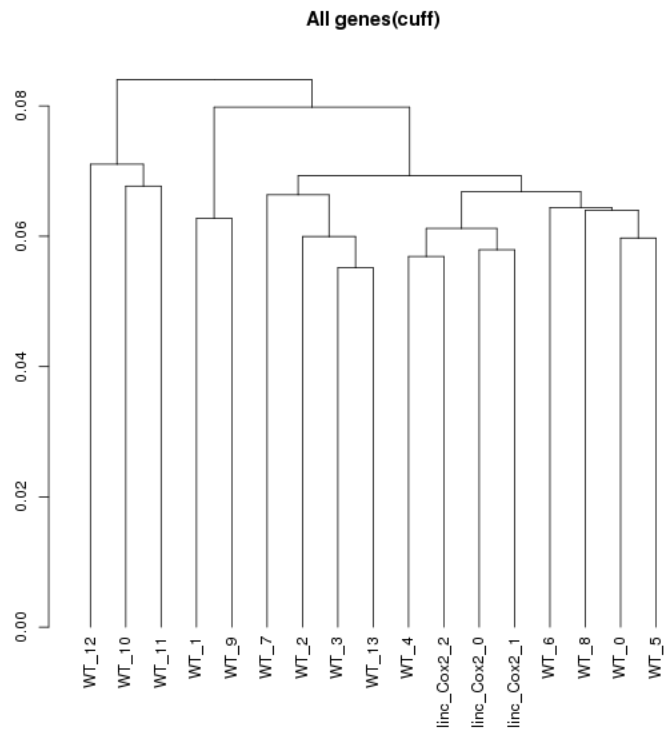

## NULL

## PCA (genes)



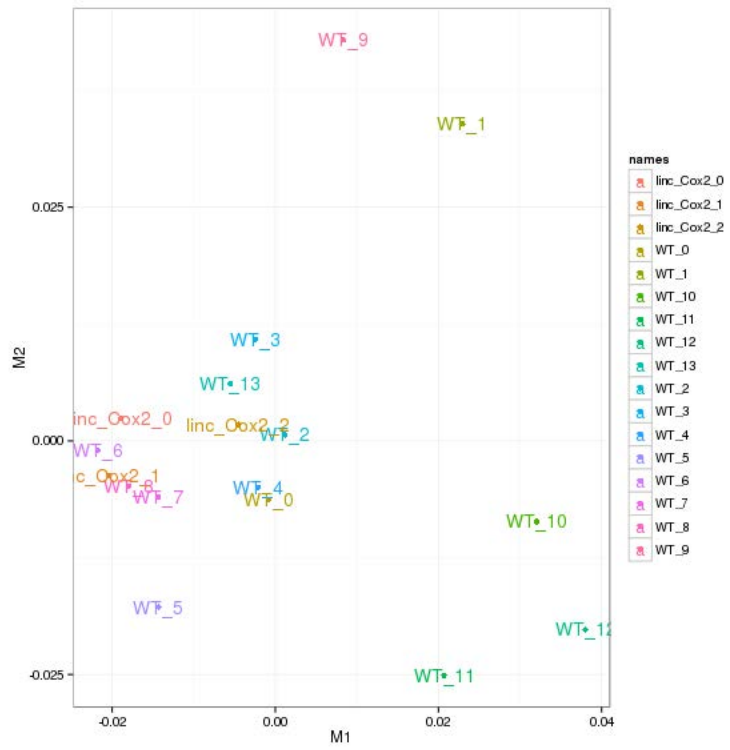

## KO assessment

Endogenous lincRNA expression

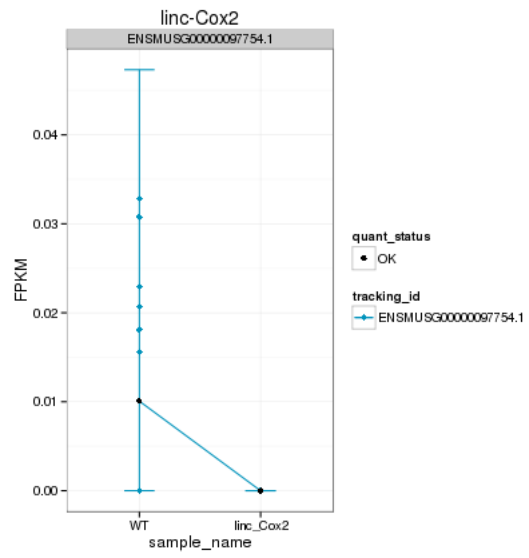

Endogenous expression of linc-Cox2 isoforms:



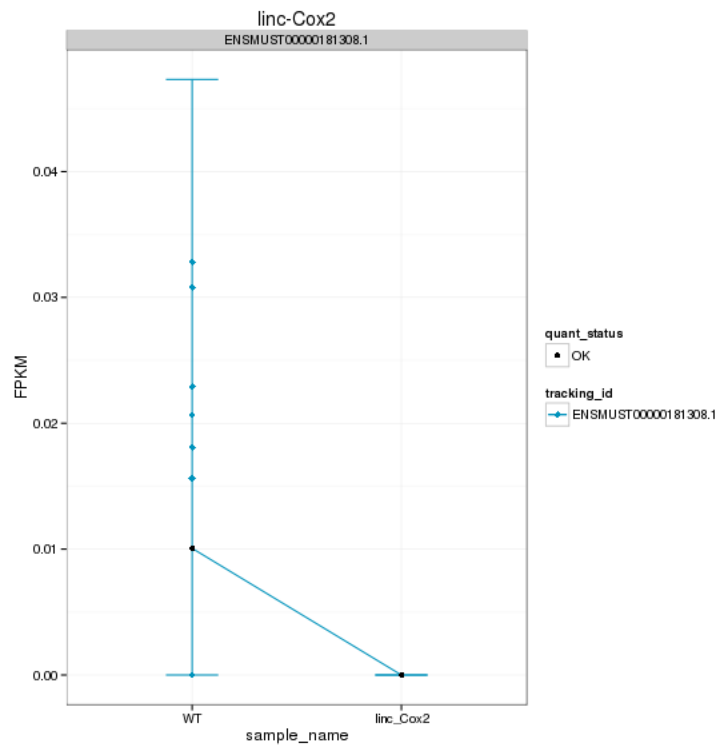

Barplot of gene expression:

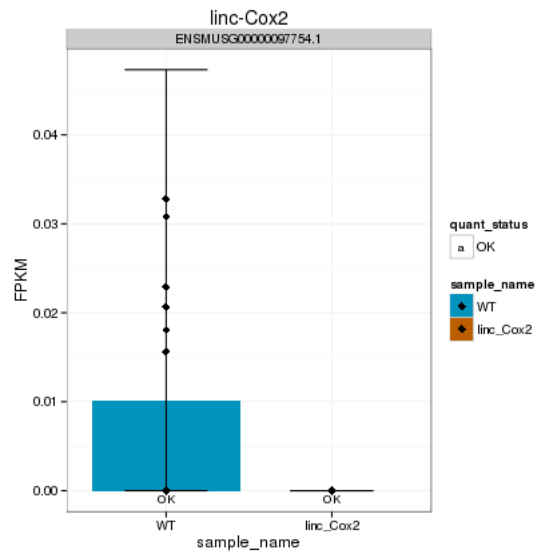

Barplot of isoform expression:

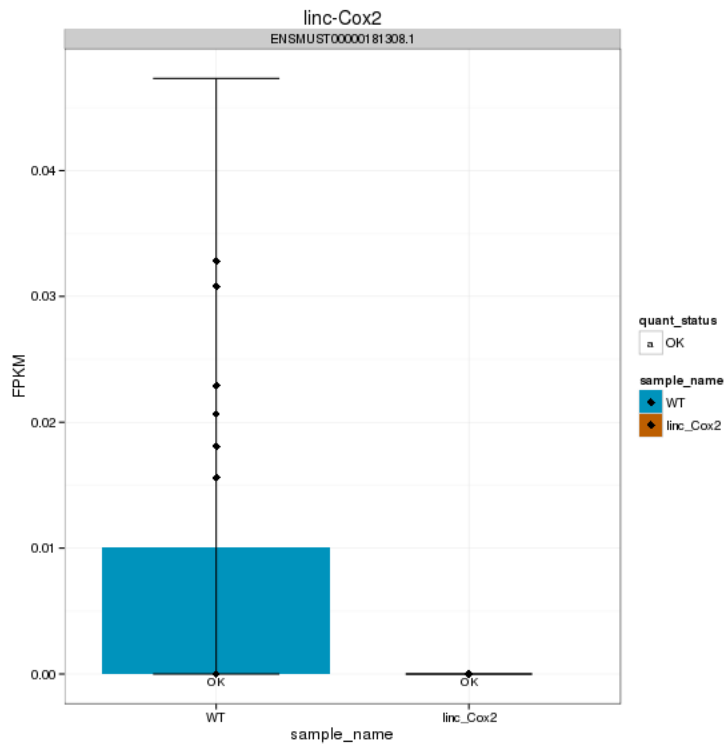

## LacZ expression

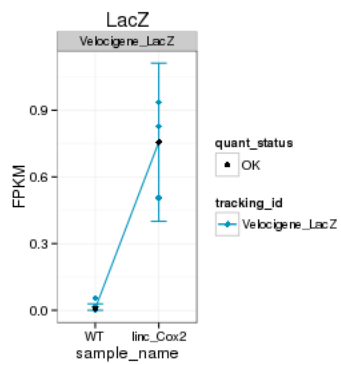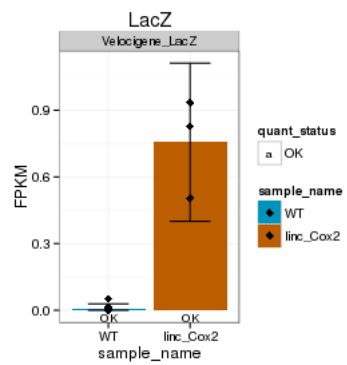

## Digital Genotyping (LacZ vs Endogenous lincRNA and Sex)

Eif2s3y is a y-expressed gene, Xist is an x-expressed gene Expression plot (endogenous linc, lacZ, Y-expressed gene):

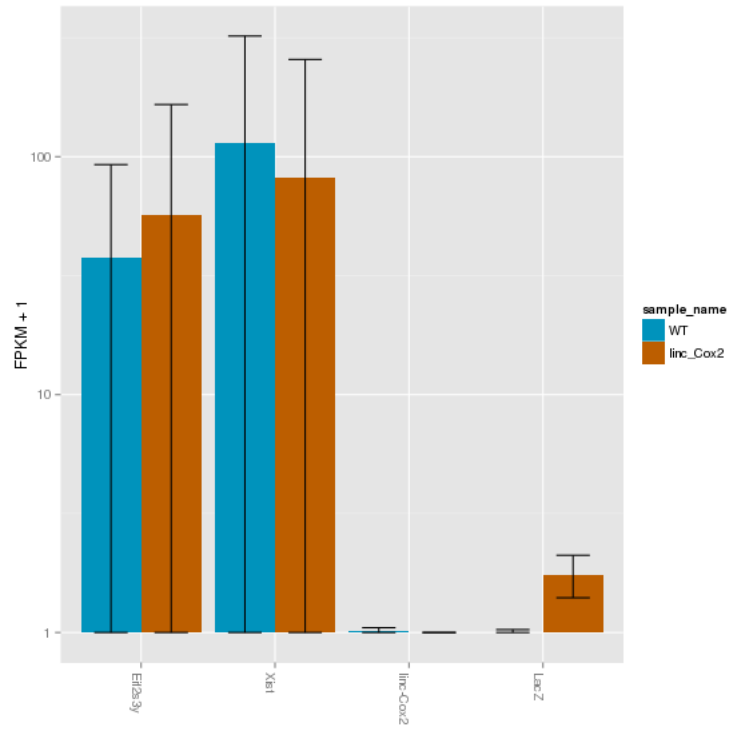

Expression heatmap:

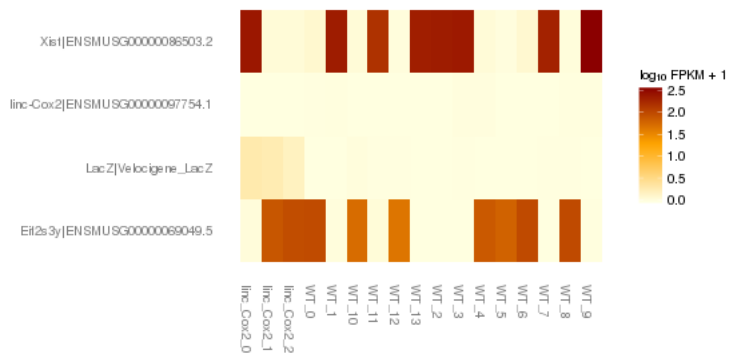

Track visualization

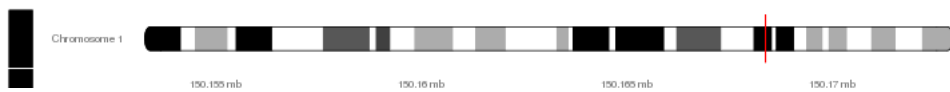

RG Region | line\_Coord\_1 | line\_Coord\_2 | line\_Coord\_3 | WT\_0 | WT\_1 | WT\_2 | WT\_3 | WT\_4 | WT\_5 | WT\_6 | WT\_7 | WT\_8 | WT\_9 | WT\_10 | WT\_11 | WT\_12 | WT\_13

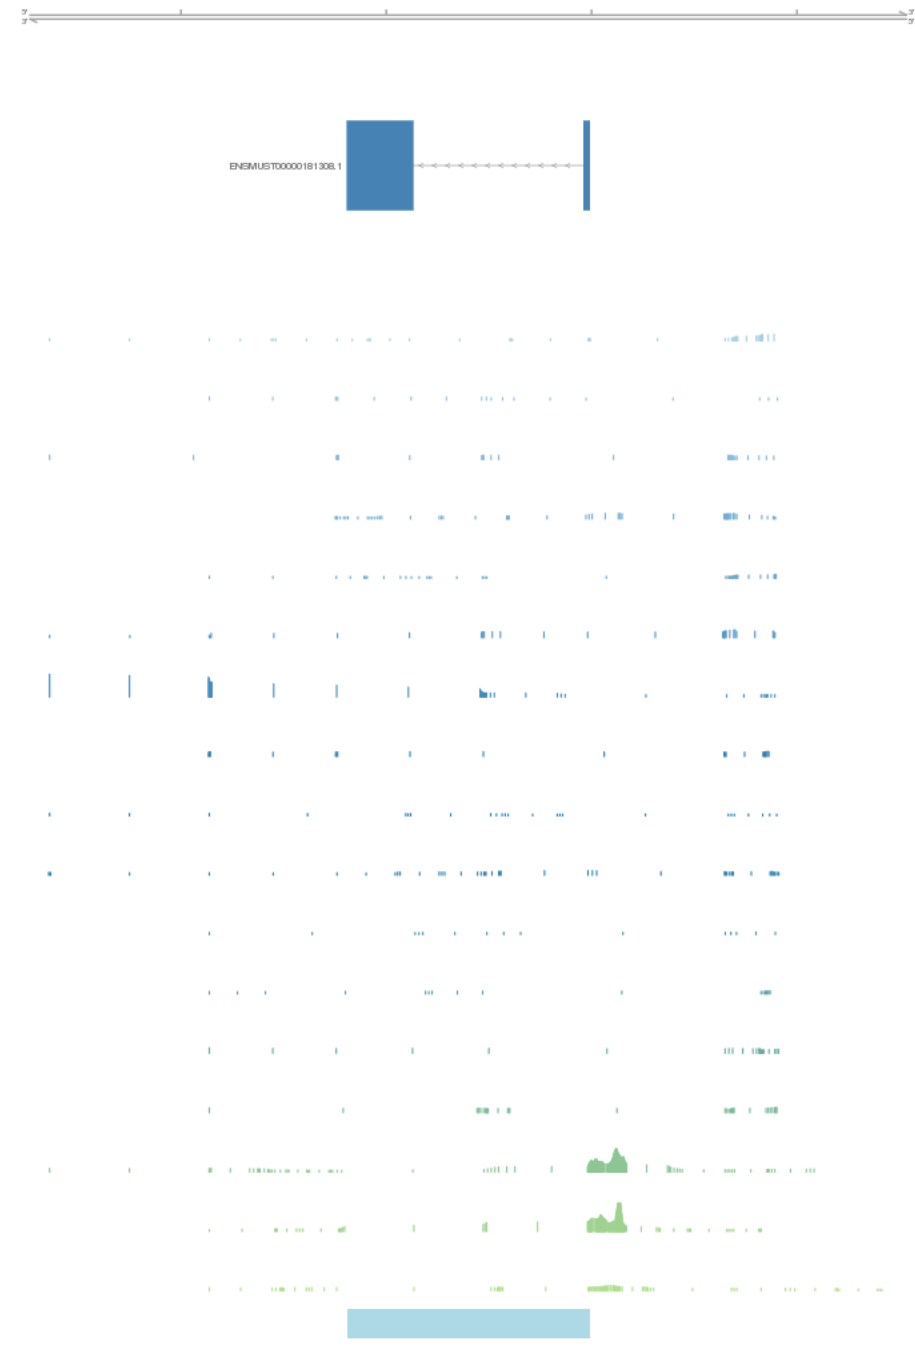

# Differential Analysis

## Differential Genes

There are 97 significantly differentially expressed genes. They are:

```
geneAnnot$gene_short_name
1 Col1a1
2 Rec8
3 Zfp40
4 Fam131c
5 Vax1
6 Ttc9b
7 Lama2
8 Snrpf
9 Skor1
10 Dlx2
11 Park2
12 Glo1
13 Prss41
14 Atp6v0c
15 Hn1l
16 Lox
17 Fbn2
18 Rps14
19 Lbx1
20 Col3a1
21 Fn1
22 Bok
23 Mcm6
24 Dbi
25 Fbn1
26 Syt13
27 Rps3a1
28 Svep1
29 Uncx
30 Emp1
31 Dera
32 Hddc3
33 Pgl3
34 Col12a1
35 Dnah8
36 Irf2bpl
37 Arhgap27
```

38 Gbx2  
39 Rnps1  
40 Prr7  
41 Lars2  
42 Arx  
43 3110052M02Rik  
  
44 Mgat5  
45 Lum  
46 Decr2  
47 Cldn11  
48 Vstm2l  
49 Hoxb4  
50 Shank1  
51 Pcsk1n  
52 Tlx3  
53 C1qtnf4  
54 2310036O22Rik  
55 Fmod  
56 Shisa4  
57 Hebp1  
58 Pgp  
59 Gm9493  
60 Rps2  
61 Acp1  
62 Olfml2a  
63 Hmga1  
64 Lrrc4b  
65 Dmrt2  
66 Mafa  
67 Tagap1  
68 Hbb-y  
69 Zfp771  
70 Pign  
  
71 Kdm5d  
72 Capn11  
73 H2afj  
74 Alox5ap  
75 Rpl26  
76 Sox11  
77 Zfp428  
78 Sp9  
79 Nkain2  
80 Ssbp4

- 81 Gm1673
- 82 Jund
- 83 Gpr27
- 84 9030025P20Rik
- 85 Wdfy1
- 86 Hbb-bt
- 87 Rpl39
- 88 Gm11273
- 89 Ccdc85c
- 90 Ier5l
- 91 Myl6
- 92 Rnaset2b
- 93 Ccdc85b
- 94 Gm6472
- 95 Gm9825
- 96 Gm26917
- 97 Gm26924

### Matrix of gene significant differences between conditions

(skip for Brainmap wt-v-ko comparisons)

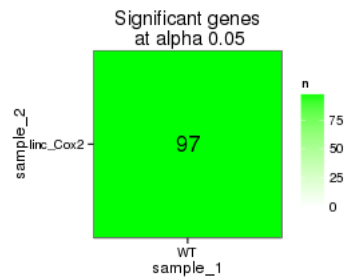

### Significant gene expression differences between conditions

Expression plot (genes):(turned off)



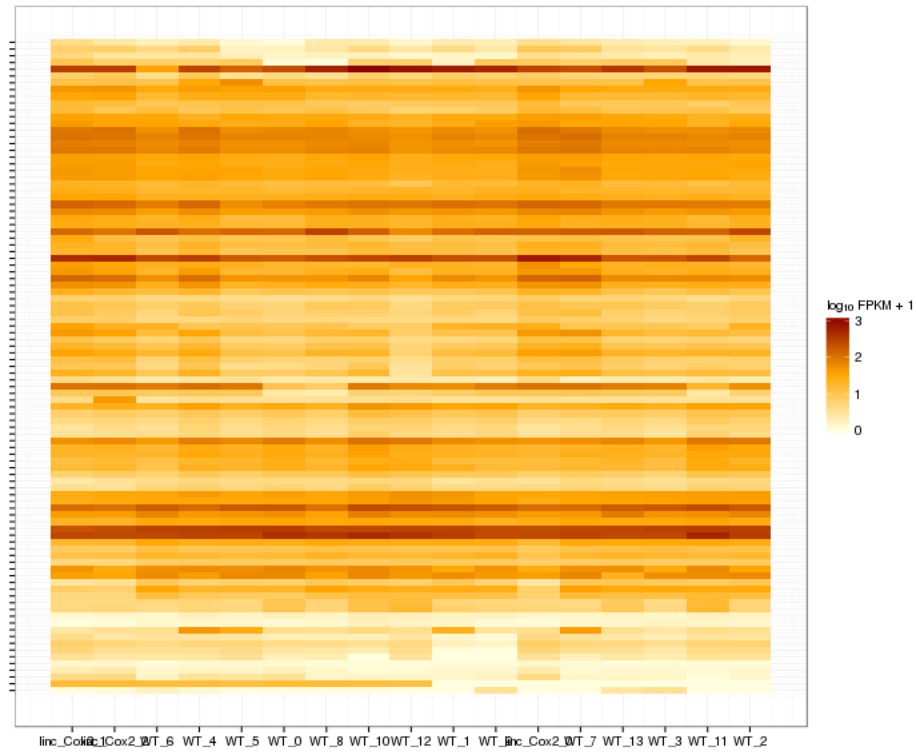

Significant genes with expression >50fpm (any condition):(turned off)

An individual look at each of the highly expressed significantly differentially regulated genes: (eval=false for first pass)

### Expression-level/significance relationship

Scatter plot of significant genes only:

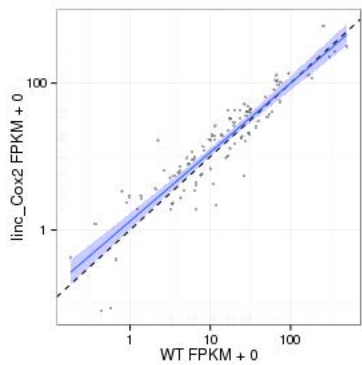

### Volcano Plot

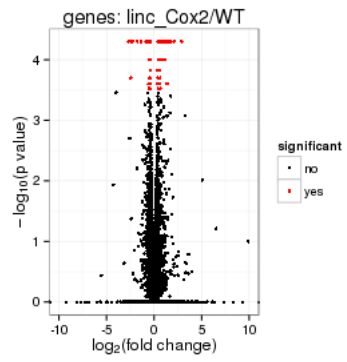

### Volcano plot with significant genes only:

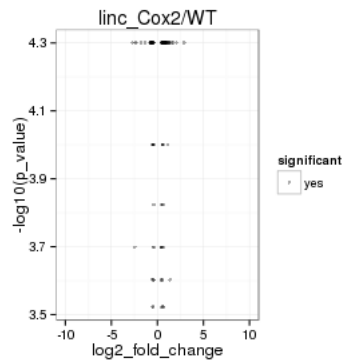

### FoldChange Heatmap

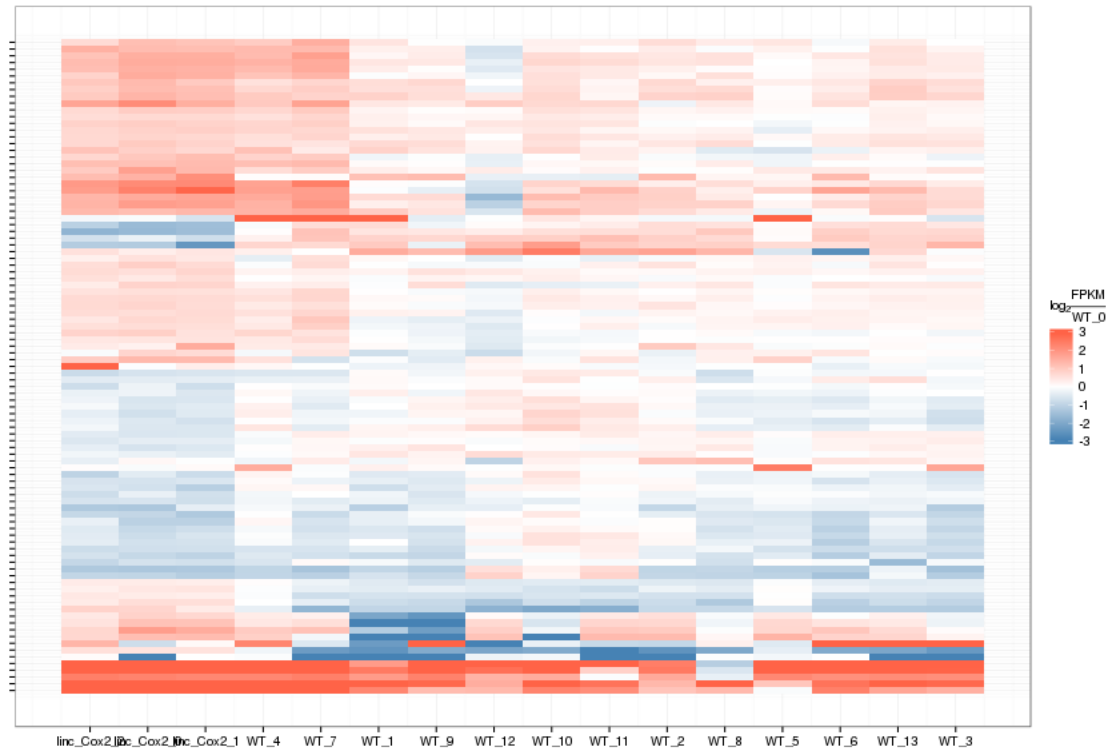

## Differential Splicing

### Differential Isoforms between conditions

Per isoform difference between conditions:

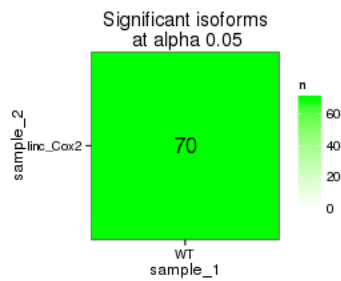

These isoforms are:

**isoAnnot\$gene\_short\_name**

- 1 Dynl1c
- 2 Col1a1
- 3 Rec8
- 4 Zfp40
- 5 Lama2
- 6 Snrpf
- 7 Prpf8
- 8 Dlx2
- 9 Hcfc1r1
  
- 10 Glo1
- 11 Prss41
- 12 Atp6v0c
- 13 Hn1l
- 14 Lox
- 15 Rps14
- 16 Lbx1
- 17 Fn1
- 18 Bok
- 19 Asb1
- 20 Mcm6
- 21 Dbi
- 22 Lrp2
- 23 Rps3a1
- 24 Svep1
- 25 Ski
- 26 Dera
- 27 Hddc3
- 28 Dnah8
- 29 Gbx2
- 30 Rnps1
- 31 Fam171a2
- 32 Prr7
- 33 Lars2
- 34 3110052M02Rik
- 35 Cldn11
- 36 Vstm2l
  
- 37 Pcsk1n
- 38 Dgkz
- 39 Tlx3
- 40 C1qtnf4

41 2310036O22Rik  
42 Fmod  
43 Dlgap3  
44 Reln  
45 Hebp1  
46 Olfm12a  
47 Hmga1  
48 Dmrta2  
49 Mafa  
50 Col6a3  
51 Tagap1  
52 Hbb-y  
53 Zfp771  
54 Pign  
55 Capn11  
56 Sox11  
57 Sp9  
58 Gpr98  
59 Ssbp4  
60 Jund  
61 Gpr27  
62 9030025P20Rik  
63 Gm11273  
64 Ccdc85c  
  
65 Myl6  
66 Ccdc85b  
67 Gm6472  
68 Gm9825  
69 Gm26917  
70 Gm26924

Gene-level DE isoform heatmap

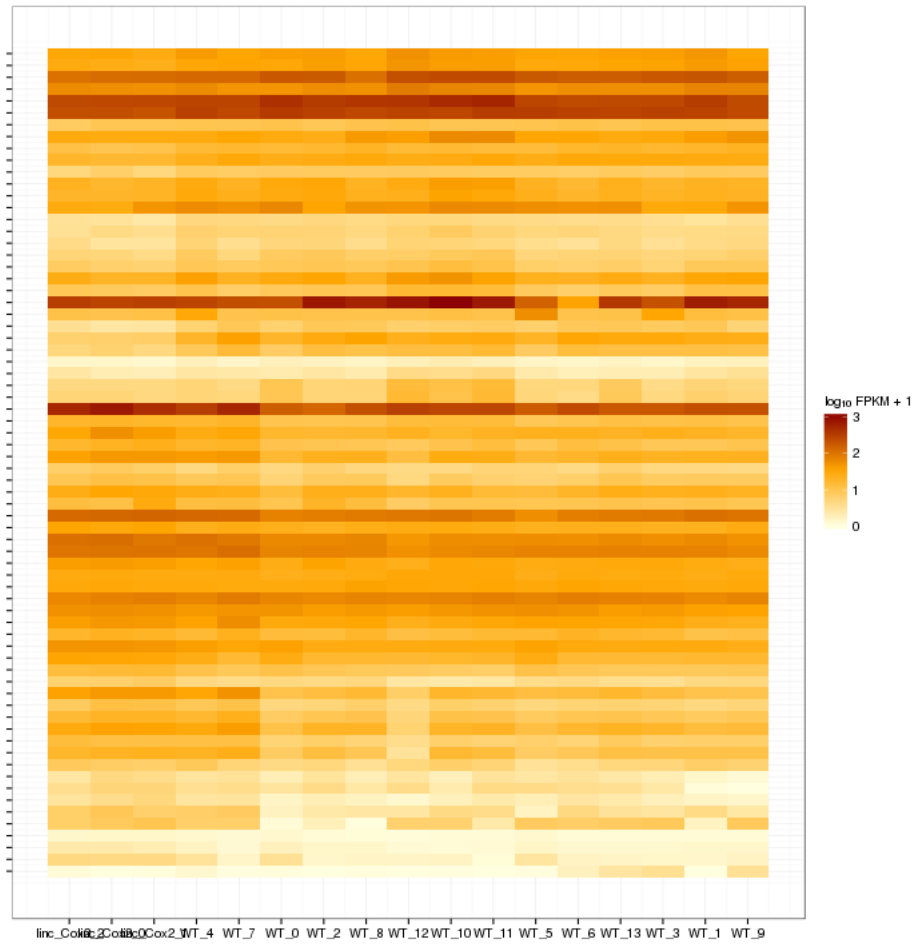

Isoform foldchange heatmap by isoform:

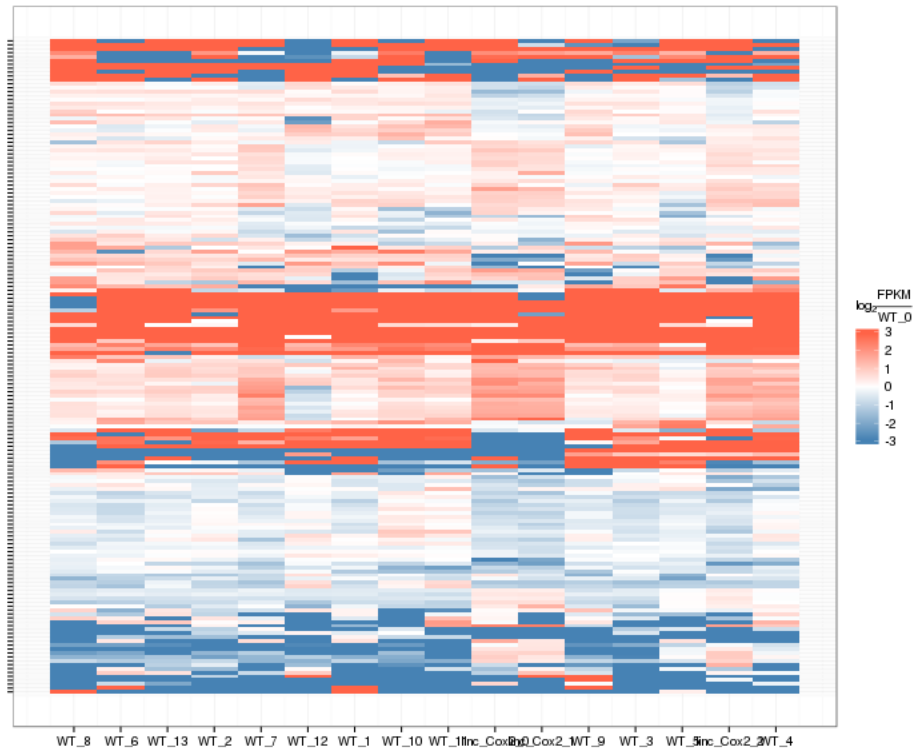

## Differential Splicing between conditions

(eval false for first pass)

Per condition differences in isoforms (Does gene have diff piechart between conditions?)

These genes are:

Splicing heatmap by isoform:

Splicing heatmap by gene

The following are significantly differentially spliced genes (relative portion of isoform per condition):

## Gene/Pathway Analysis

### GSEA

Enrichment and zscores are calculated based on expression in KO vs WT ( $\text{fpkmKO}/\text{fpkmWT}$ ), so genes that are down regulated in KO are shown in blue, while upregulation is shown in red.

KOWT Blue = down in KO Red = Up in KO

Biocarta enrichment:

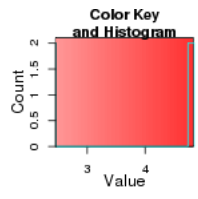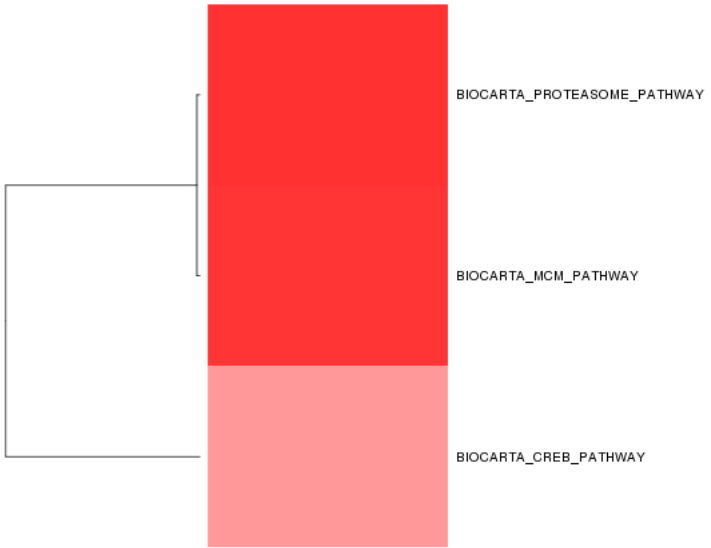

Biocarta zscore:



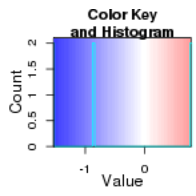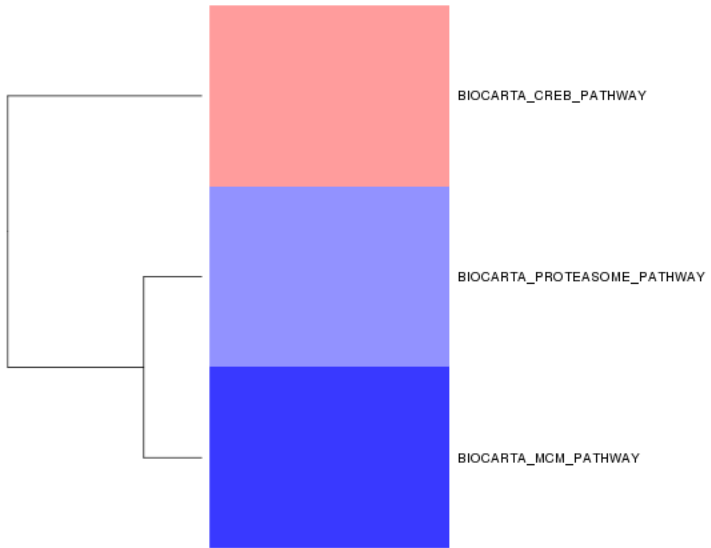

Reactome enrichment:

```
## Error: no locations are finite
```

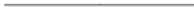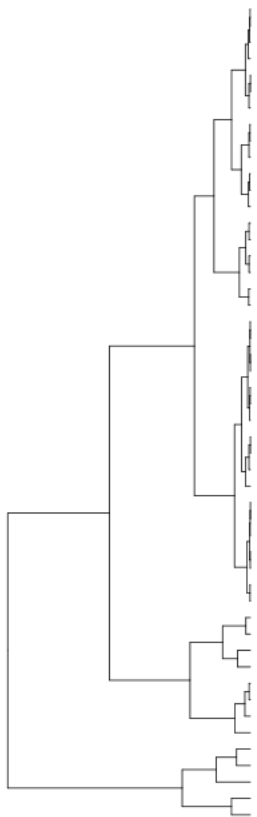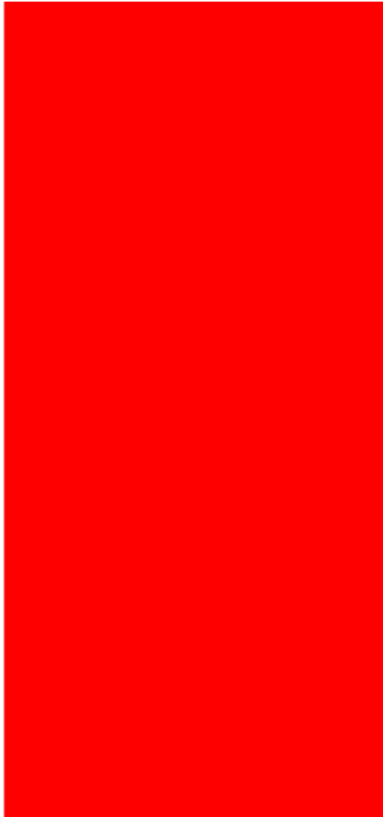

REACTOME\_REGULATION\_OF\_MITOTIC\_CELL\_  
REACTOME\_DNA\_STRAND\_ELONGATION  
REACTOME\_DNA\_REPAIR  
REACTOME\_MRNA\_SPLICING  
REACTOME\_CYCLIN\_E\_ASSOCIATED\_EVENTS  
REACTOME\_INFLUENZA\_LIFE\_CYCLE  
REACTOME\_COLLAGEN\_FORMATION  
REACTOME\_ACTIVATION\_OF\_THE\_PRE\_REPLI  
REACTOME\_G2\_M\_CHECKPOINTS  
REACTOME\_TRANSLATION  
REACTOME\_ASSEMBLY\_OF\_THE\_PRE\_REPLIC  
REACTOME\_SRP\_DEPENDENT\_COTRANSLATI  
REACTOME\_HIV\_INFECTION  
REACTOME\_METABOLISM\_OF\_MRNA  
REACTOME\_PROCESSING\_OF\_CAPPED\_INTRC  
REACTOME\_MITOTIC\_PROMETAPHASE  
REACTOME\_ORC1\_REMOVAL\_FROM\_CHROMA  
REACTOME\_MRNA\_PROCESSING  
REACTOME\_NEUROTRANSMITTER\_RECEPTOR  
REACTOME\_METABOLISM\_OF\_PROTEINS  
REACTOME\_GABA\_SYNTHESIS\_RELEASE\_REI  
REACTOME\_HIV\_LIFE\_CYCLE  
REACTOME\_INFLUENZA\_VIRAL\_RNA\_TRANSCF  
REACTOME\_ANTIGEN\_PROCESSING\_CROSS\_f  
REACTOME\_SCF5KP2\_MEDIATED\_DEGRADATI  
REACTOME\_NEUROTRANSMITTER\_RELEASE\_C  
REACTOME\_ER\_PHAGOSOME\_PATHWAY  
REACTOME\_RESPIRATORY\_ELECTRON\_TRANF  
REACTOME\_CDT1\_ASSOCIATION\_WITH\_THE\_C  
REACTOME\_ACTIVATION\_OF\_ATR\_IN\_RESPON  
REACTOME\_RNA\_POL\_II\_TRANSCRIPTION  
REACTOME\_TCA\_CYCLE\_AND\_RESPIRATORY\_  
REACTOME\_RNA\_POL\_II\_TRANSCRIPTION\_PRI  
REACTOME\_REGULATION\_OF\_MRNA\_STABILIT  
REACTOME\_TRANSCRIPTION\_COUPLED\_NER\_  
REACTOME\_METABOLISM\_OF\_AMINO\_ACIDS\_  
REACTOME\_CROSS\_PRESENTATION\_OF\_SOLI  
REACTOME\_S\_PHASE  
REACTOME\_TRANSMISSION\_ACROSS\_CHEMIC  
REACTOME\_G1\_S\_TRANSITION  
REACTOME\_SYNTHESIS\_OF\_DNA  
REACTOME\_METABOLISM\_OF\_RNA  
REACTOME\_CELL\_CYCLE\_CHECKPOINTS  
REACTOME\_M\_G1\_TRANSITION  
REACTOME\_MITOTIC\_G1\_G1\_S\_PHASES  
REACTOME\_MITOTIC\_M\_M\_G1\_PHASES  
REACTOME\_NEURONAL\_SYSTEM  
REACTOME\_CELL\_CYCLE  
REACTOME\_DNA\_REPLICATION  
REACTOME\_CELL\_CYCLE\_MITOTIC

Reactome zscore:

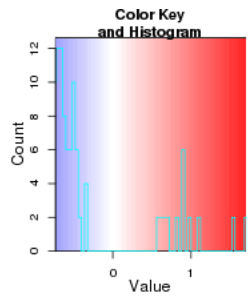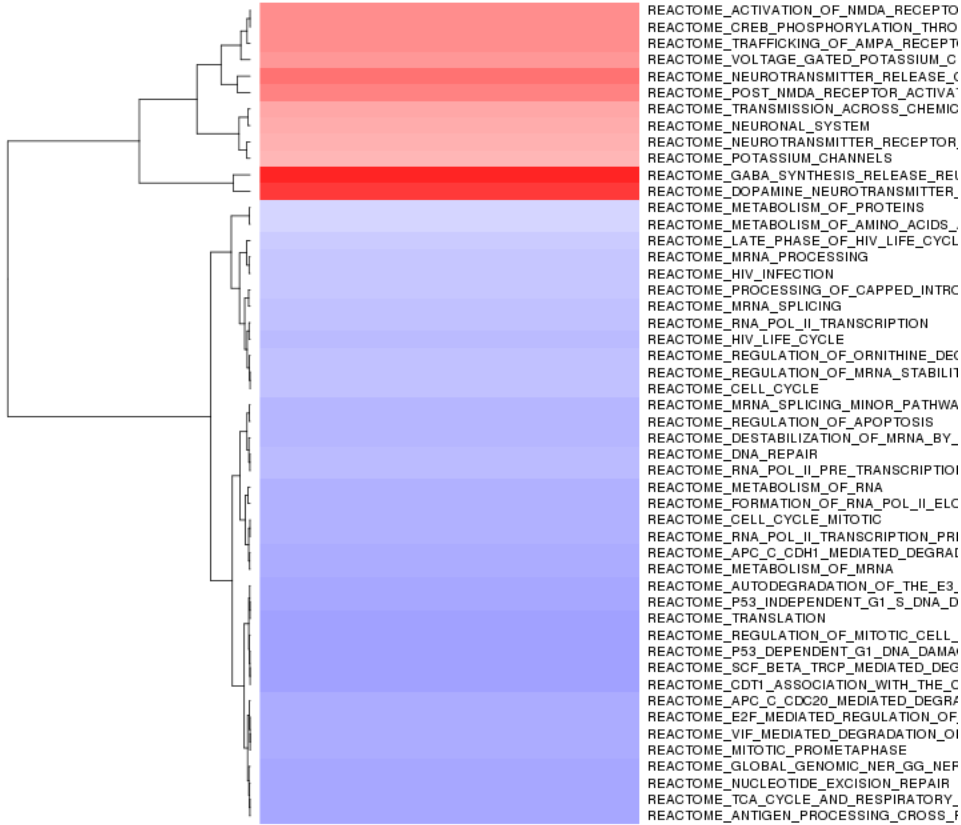

Kegg enrichment:

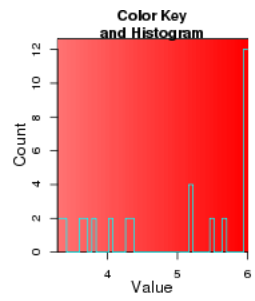

\_\_\_\_\_

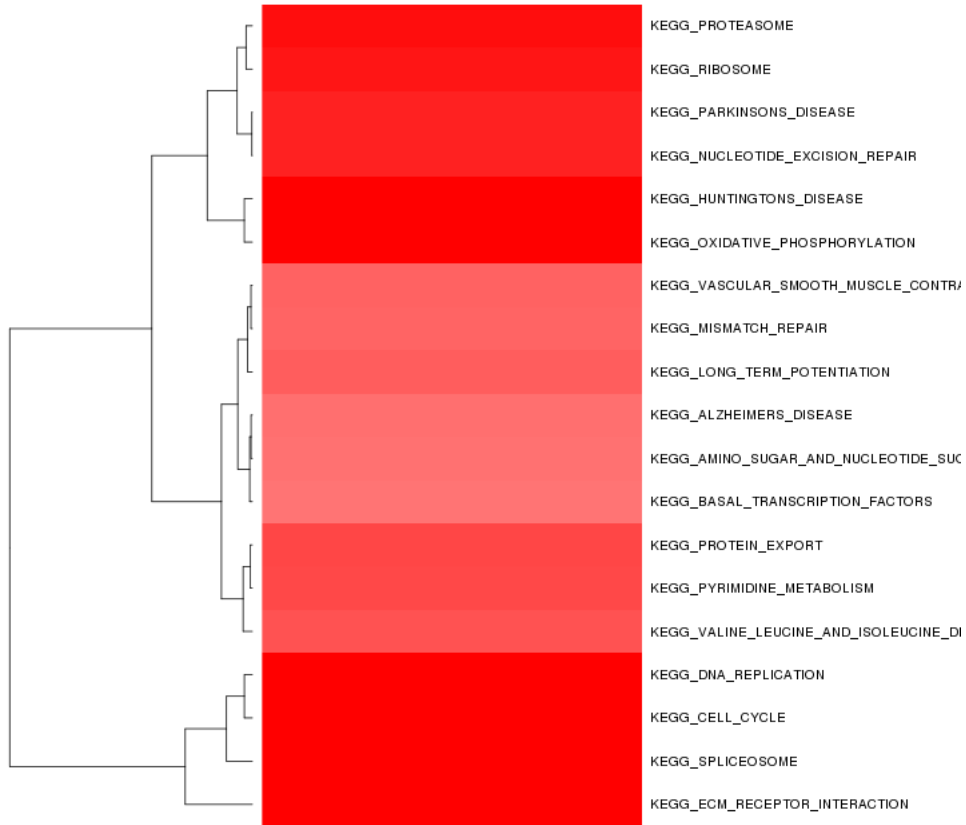

Kegg zscore:

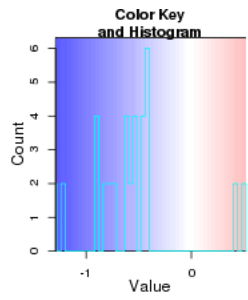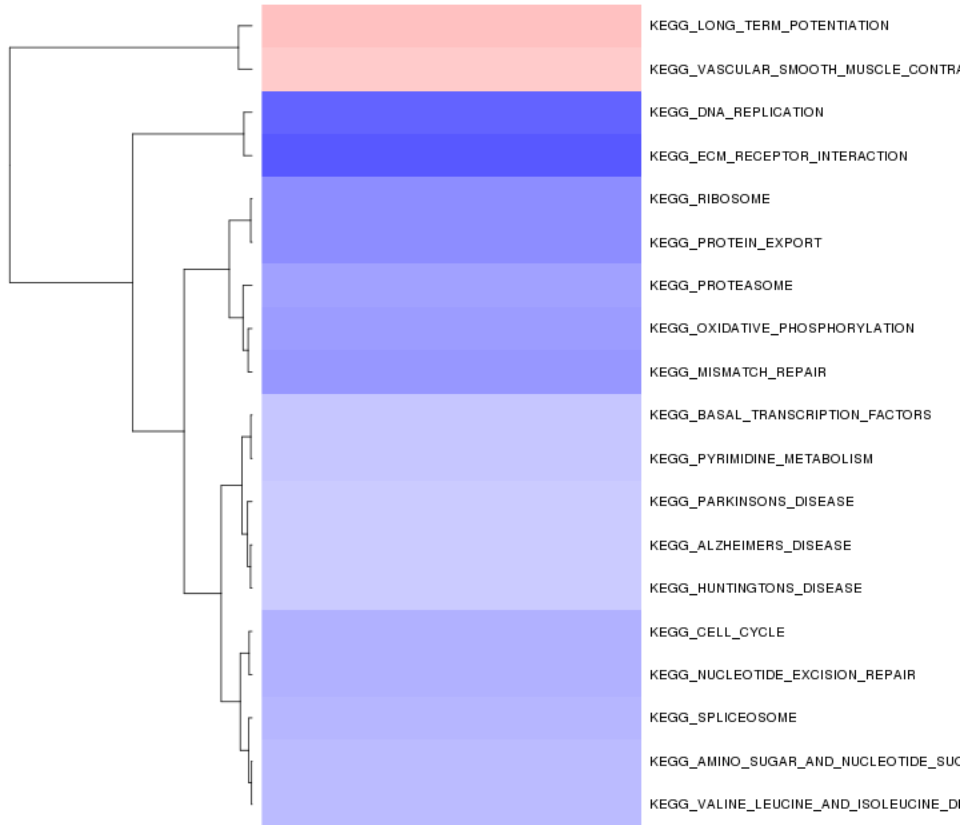

Interneuron enrichment:

```
## Error: argument is of length zero
```

Interneuron zscore:

```
## Error: incorrect number of dimensions
```

```
## Error: object 'x_ordered' not found
```

```
## Error: error in evaluating the argument 'x' in selecting a method for function 'as.matrix': Error: object 'x_ordered' not found
```

```
## Error: object 'x_ordered' not found
```

Oncogene enrichment:

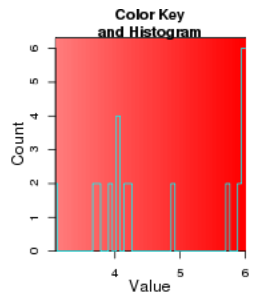

\_\_\_\_\_

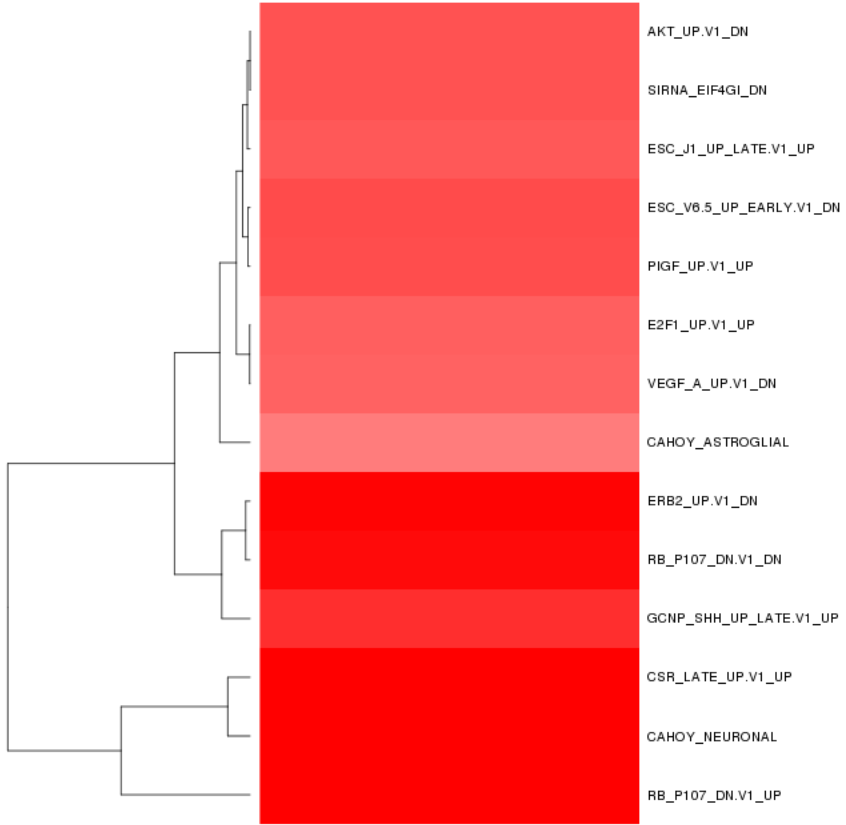

Oncogene zscore:

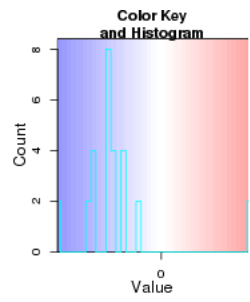

\_\_\_\_\_

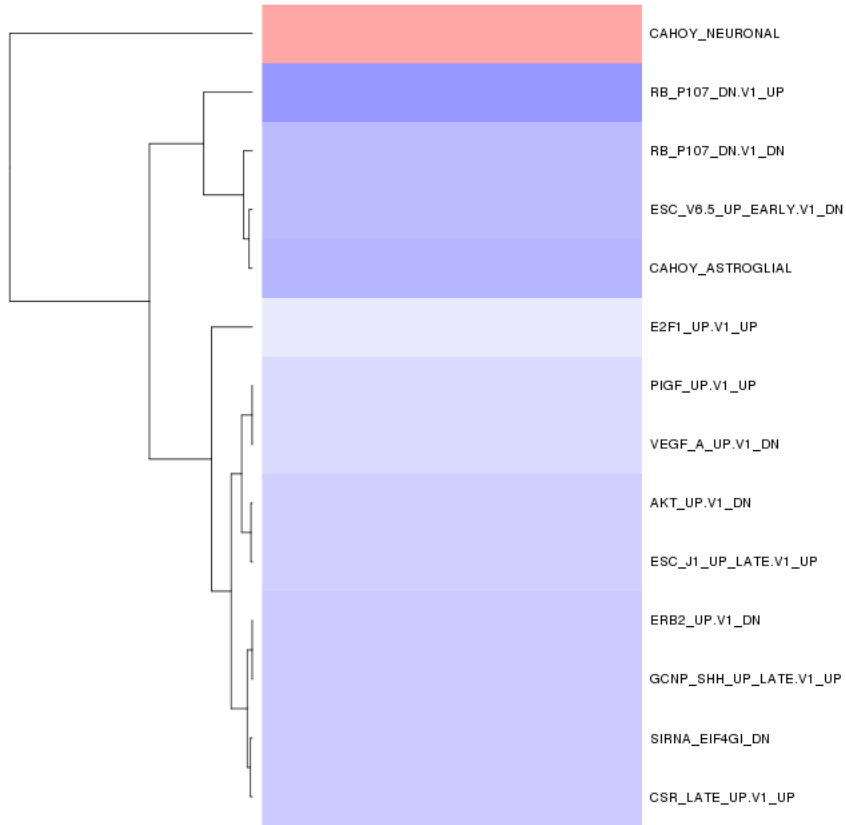

Immuno enrichment:

## Error: no locations are finite





\_\_\_\_\_

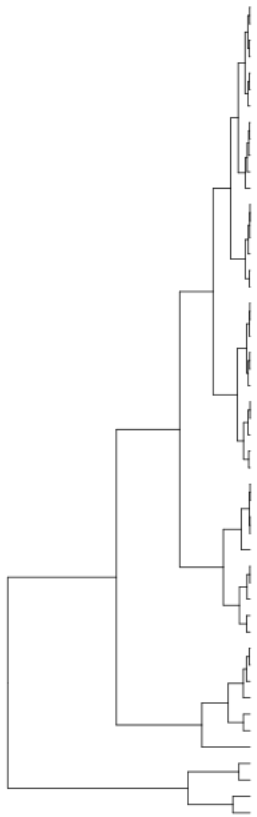

GSE17974\_0H\_VS\_24H\_IN\_VITRO\_ACT\_CD4\_T  
GSE20609\_CTRL\_VS\_COSTIM\_BLOCK\_MLR\_CI  
GSE3337\_4H\_VS\_16H\_IFNG\_IN\_CD8POS\_DC\_I  
GSE30962\_ACUTE\_VS\_CHRONIC\_LCMV\_SECO  
GSE24634\_TREG\_VS\_TCONV\_POST\_DAYS\_IL4  
GSE31082\_DN\_VS\_CD8\_SP\_THYMOCYTE\_UP  
GSE15930\_NAIVE\_VS\_72H\_IN\_VITRO\_STIM\_TF  
GOLDRATH\_EFF\_VS\_MEMORY\_CD8\_TCELL\_UP  
GSE15930\_NAIVE\_VS\_24H\_IN\_VITRO\_STIM\_IL  
GSE29617\_CTRL\_VS\_DAY3\_TIV\_FLU\_VACCINE  
GSE24634\_NAIVE\_CD4\_TCELL\_VS\_DAY3\_IL4\_  
GSE30476\_CTRL\_VS\_TSST\_ACT\_16H\_MEMOR  
GSE9050\_NAIVE\_VS\_EFF\_CD8\_TCELL\_DN  
GSE31082\_DN\_VS\_CD4\_SP\_THYMOCYTE\_UP  
GSE10239\_NAIVE\_VS\_DAY4.5\_EFF\_CD8\_TCEL  
GSE22886\_UNSTIM\_VS\_IL2\_STIM\_NKCELL\_DN  
GSE17974\_CTRL\_VS\_ACT\_IL4\_AND\_ANTI\_IL12  
GSE14000\_TRANSLATED\_RNA\_VS\_MRNA\_DC\_  
GSE15930\_NAIVE\_VS\_24H\_IN\_VITRO\_STIM\_CI  
GSE24634\_TEFF\_VS\_TCONV\_DAYS\_IN\_CULTU  
KAECH\_NAIVE\_VS\_DAY8\_EFF\_CD8\_TCELL\_DN  
GSE24634\_NAIVE\_CD4\_TCELL\_VS\_DAY7\_IL4\_  
GSE29617\_CTRL\_VS\_TIV\_FLU\_VACCINE\_PBM  
GSE3982\_CENT\_MEMORY\_CD4\_TCELL\_VS\_TH  
GSE3982\_MAC\_VS\_NEUTROPHIL\_LPS\_STIM\_U  
GSE24634\_TEFF\_VS\_TCONV\_DAY10\_IN\_CULTI  
GSE3982\_MEMORY\_CD4\_TCELL\_VS\_TH2\_DN  
GSE15930\_NAIVE\_VS\_48H\_IN\_VITRO\_STIM\_IL  
GSE30962\_PRIMARY\_VS\_SECONDARY\_ACUTE  
GSE15930\_NAIVE\_VS\_48H\_IN\_VITRO\_STIM\_IF  
GSE9050\_EFFECTOR\_VS\_MEMORY\_CD8\_TCEL  
GSE22886\_NAIVE\_CD4\_TCELL\_VS\_48H\_ACT\_  
GSE7764\_IL15\_TREATED\_VS\_CTRL\_NK\_CELL\_  
GSE29614\_CTRL\_VS\_DAY7\_TIV\_FLU\_VACCINE  
GSE24634\_TREG\_VS\_TCONV\_POST\_DAY10\_IL  
GSE12845\_NAIVE\_VS\_PRE\_GC\_TONSIL\_BCEL  
GSE22886\_UNSTIM\_VS\_STIM\_MEMORY\_TCELL  
GSE30476\_CTRL\_VS\_TSST\_ACT\_40H\_MEMOR  
GSE22886\_UNSTIM\_VS\_IL15\_STIM\_NKCELL\_D  
KAECH\_DAY8\_EFF\_VS\_MEMORY\_CD8\_TCELL\_  
GSE30476\_CTRL\_VS\_TSST\_ACT\_72H\_MEMOR  
GSE22886\_NAIVE\_CD4\_TCELL\_VS\_48H\_ACT\_  
GSE30476\_CTRL\_VS\_TSST\_ACT\_72H\_MEMOR  
GSE17974\_CTRL\_VS\_ACT\_IL4\_AND\_ANTI\_IL12  
GSE30476\_CTRL\_VS\_TSST\_ACT\_40H\_MEMOR  
GSE13485\_DAY1\_VS\_DAY21\_YF17D\_VACCINE  
GSE15750\_DAY6\_VS\_DAY10\_EFF\_CD8\_TCELL  
GSE15750\_DAY6\_VS\_DAY10\_TRAF6KO\_EFF\_C  
KAECH\_DAY8\_EFF\_VS\_DAY15\_EFF\_CD8\_TCEL  
GSE15930\_NAIVE\_VS\_48H\_IN\_VITRO\_STIM\_CI

Immuno zscore:

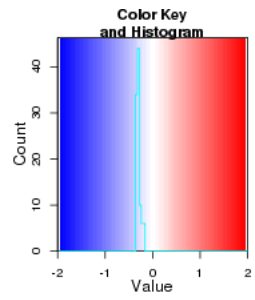

\_\_\_\_\_

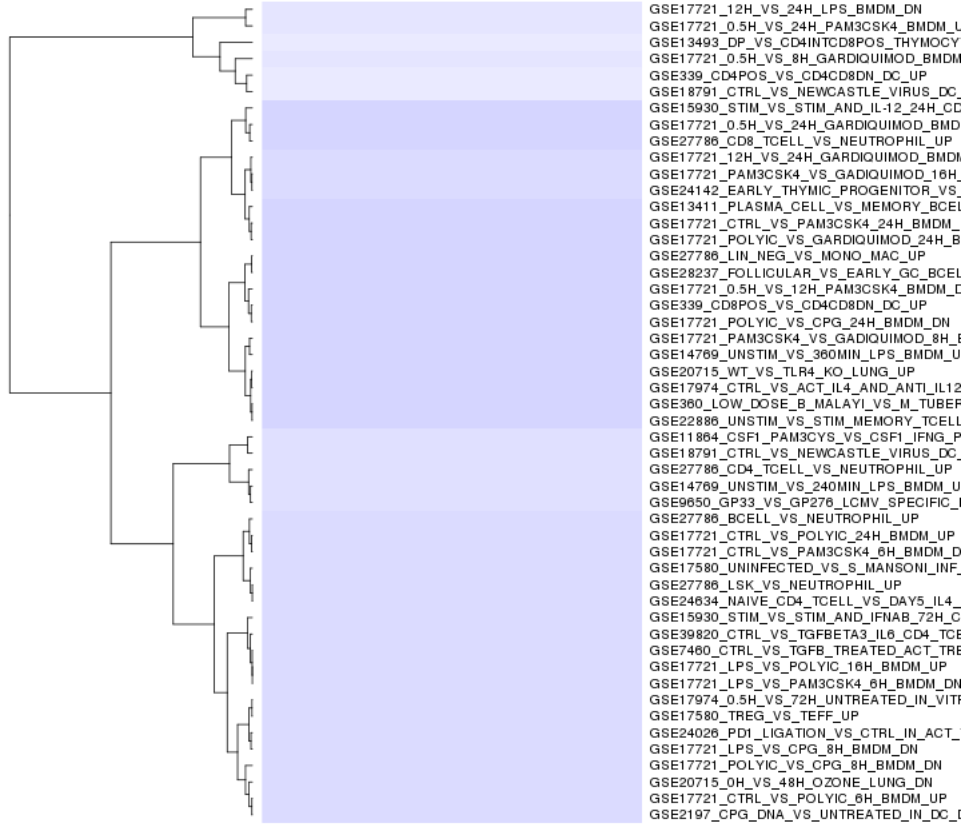

TF enrichment:

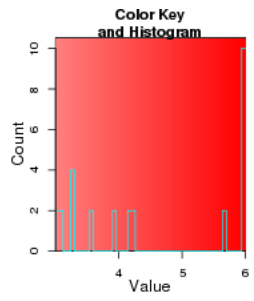

\_\_\_\_\_

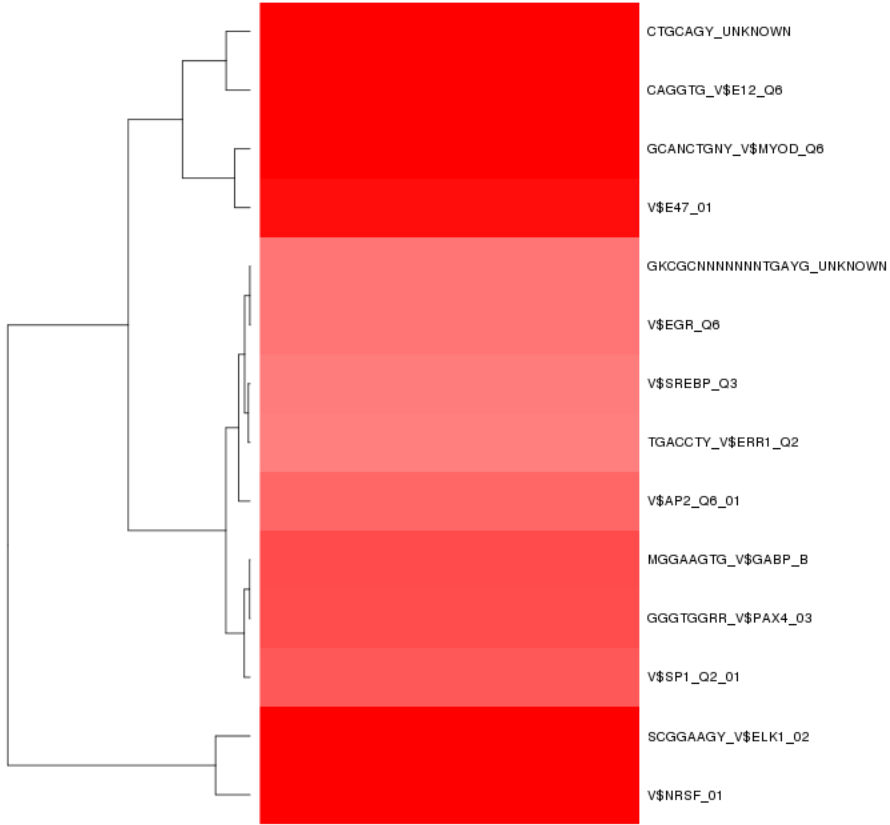

TF zscore:

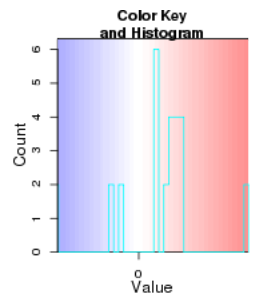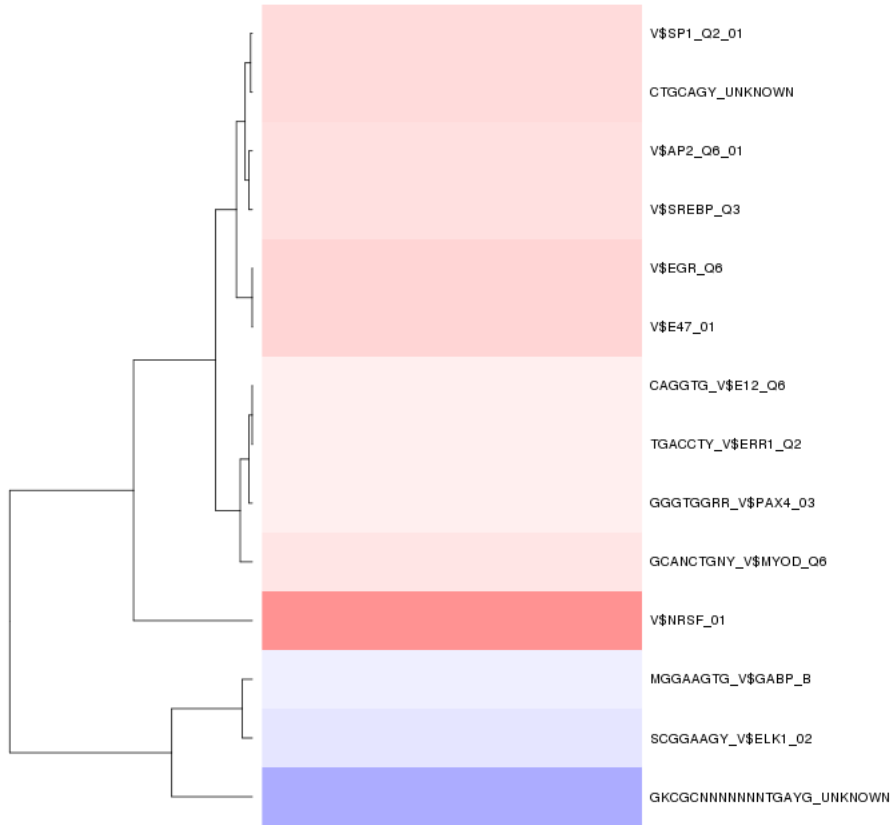

## GO enrichment

Cluster profiler used to call enrichments of significantly differentially regulated genes that map to Entrez IDs.

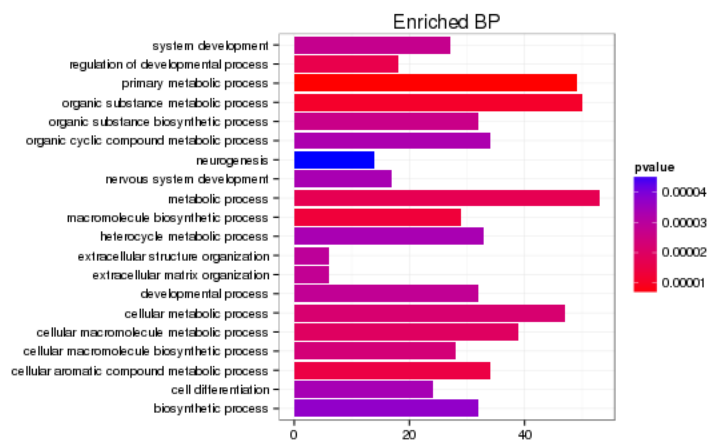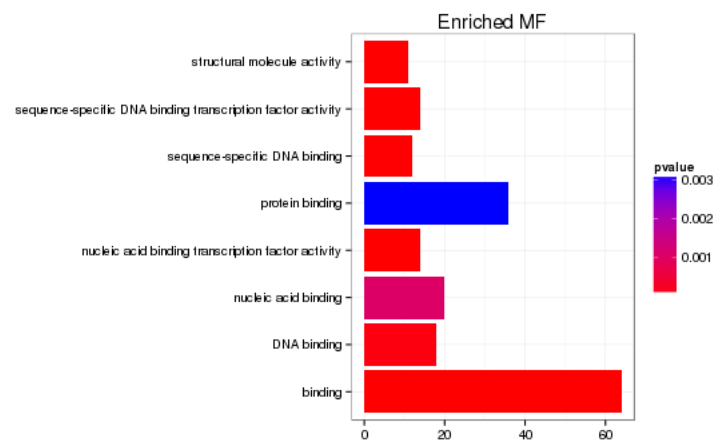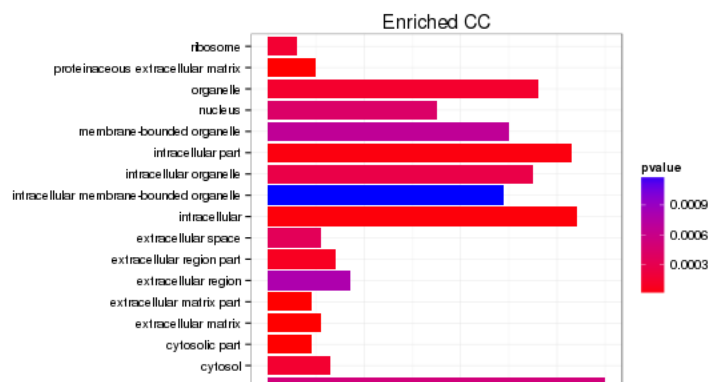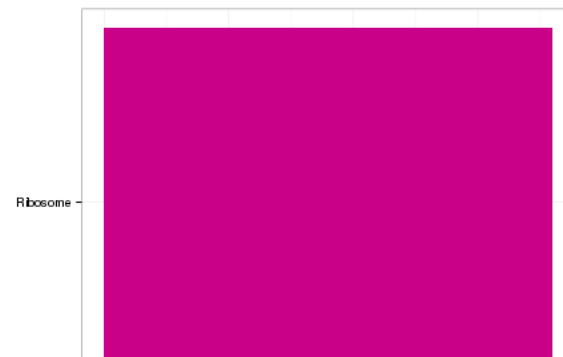

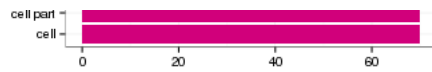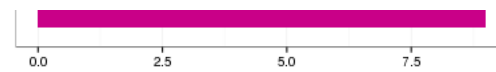

### Reactome pathway enrichment

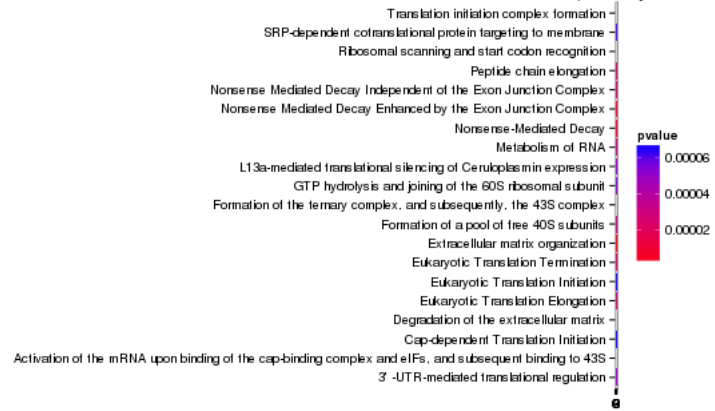

## Enrichment or depletion for stage-specific cell cycle markers

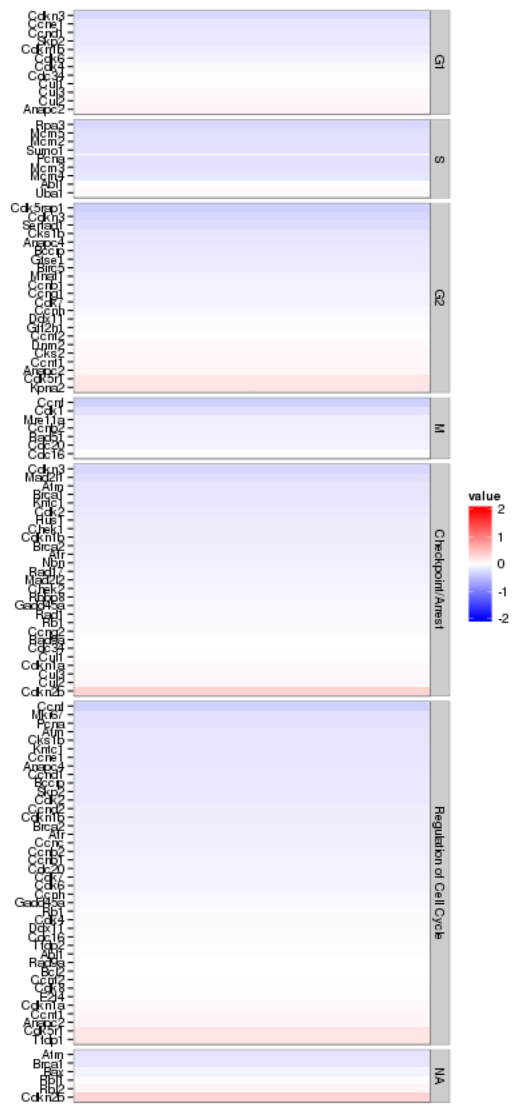

Enrichment or depletion for markers of specific cortical layers

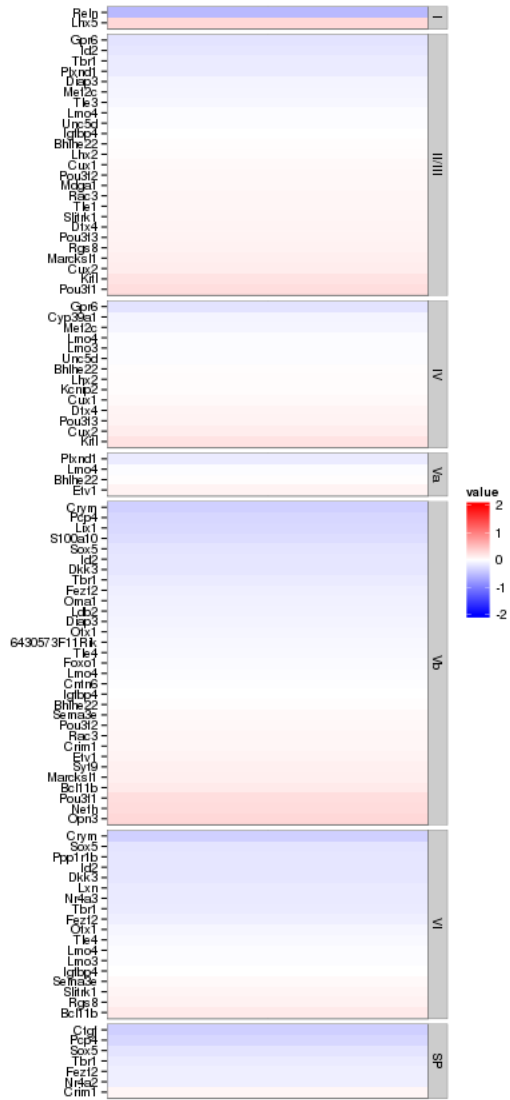

Enrichment or depletion for specific neural cell types



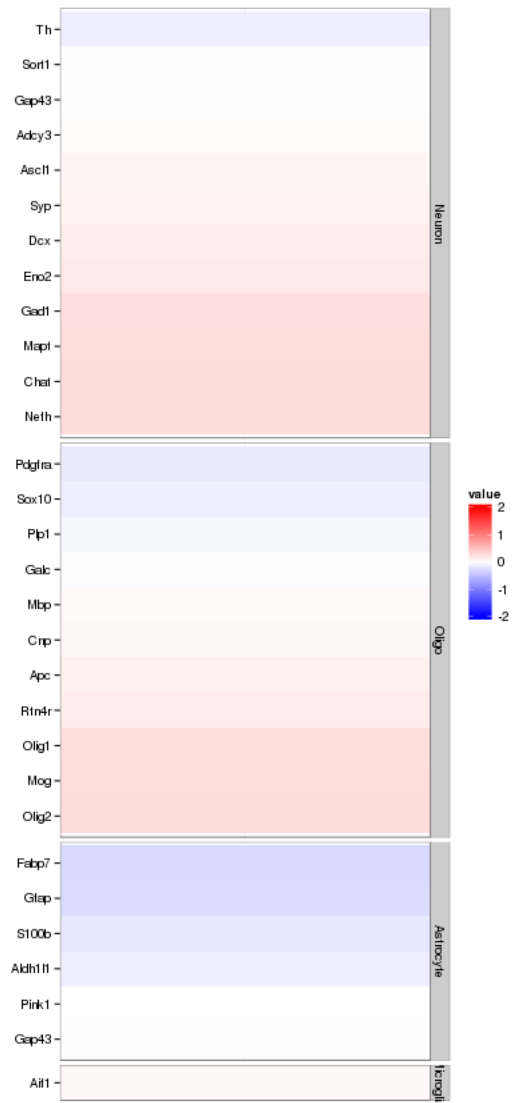

**Enrichment or Depletion of neural differentiation markers**

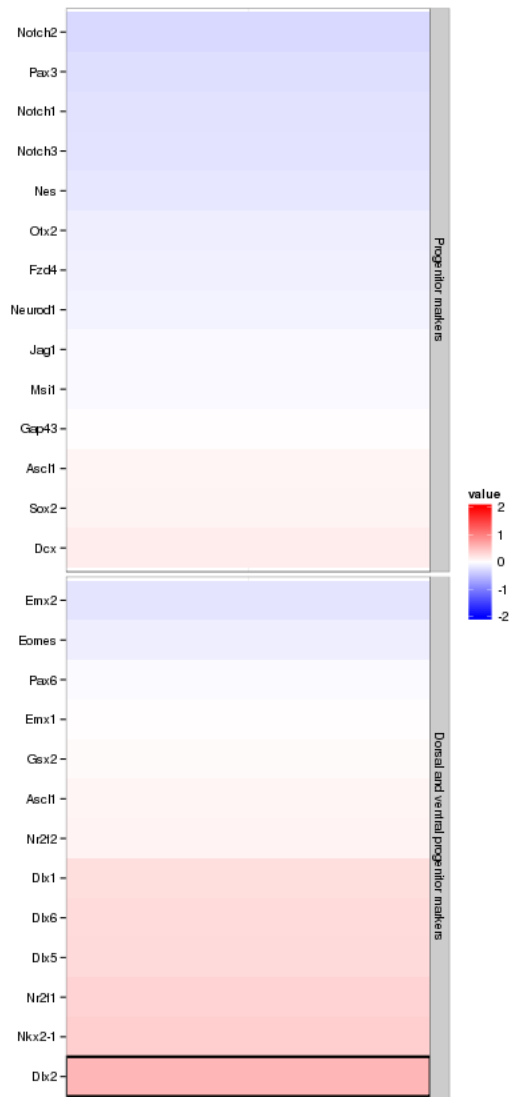

## Cis vs Trans (locally)

$\log_2$  Foldchange and test statistic are calculated with the ratio of  $\text{fpm(KO)}/\text{fpm(WT)}$ , thus the  $\text{test\_stat}$  is positive if a gene is higher in the KO and negative if a gene has lower expression in the KO

The pvalue for 0 genes significantly regulated in a region this size is: 1

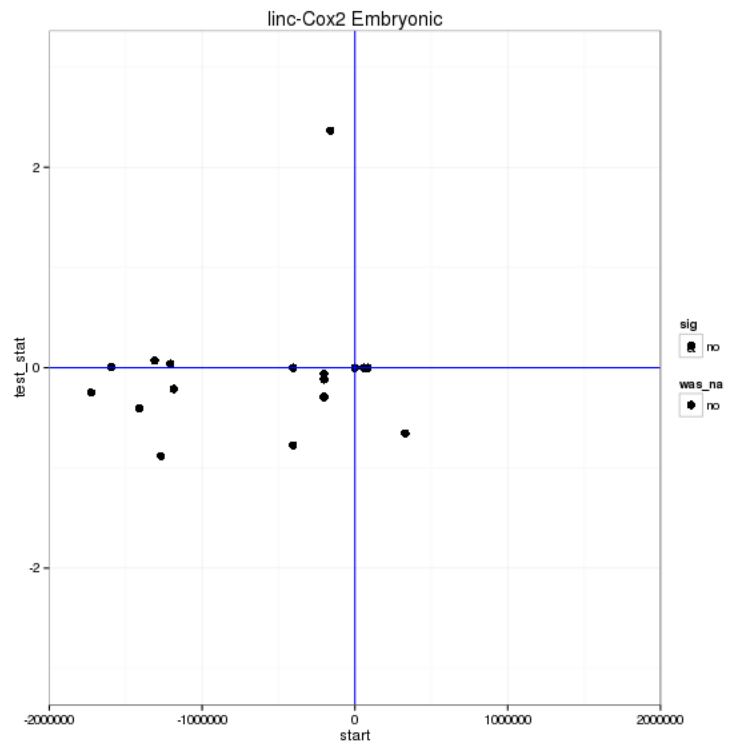

## Notes

Samples used are:

10

- 1 JR753
- 2 JR750
- 3 JR771
- 4 JR755
- 5 JR811
- 6 JR768
- 7 JR761
- 8 JR815
- 9 JR789
- 10 JR748
- 11 JR716
- 12 JR717
- 13 JR719
- 14 JR756

15 JR809  
16 JR816  
17 JR829

## Replicates

| file                                                                          | sample_name | replicate | rep_name    | total_mass  | norm_mass   | internal_scale | external_scale |
|-------------------------------------------------------------------------------|-------------|-----------|-------------|-------------|-------------|----------------|----------------|
| 1 /n/rinn_data1/seq/lgoft/Projects/BrainMap/data/quants/JR753/abundances.cxb  | WT          | 0         | WT_0        | 39331900.00 | 32194900.00 | 1.27           | 1.00           |
| 2 /n/rinn_data1/seq/lgoft/Projects/BrainMap/data/quants/JR750/abundances.cxb  | WT          | 1         | WT_1        | 36031100.00 | 32194900.00 | 1.10           | 1.00           |
| 3 /n/rinn_data1/seq/lgoft/Projects/BrainMap/data/quants/JR771/abundances.cxb  | WT          | 2         | WT_2        | 38857100.00 | 32194900.00 | 1.23           | 1.00           |
| 4 /n/rinn_data1/seq/lgoft/Projects/BrainMap/data/quants/JR755/abundances.cxb  | WT          | 3         | WT_3        | 41811300.00 | 32194900.00 | 1.29           | 1.00           |
| 5 /n/rinn_data1/seq/lgoft/Projects/BrainMap/data/quants/JR811/abundances.cxb  | WT          | 4         | WT_4        | 38172800.00 | 32194900.00 | 1.21           | 1.00           |
| 6 /n/rinn_data1/seq/lgoft/Projects/BrainMap/data/quants/JR768/abundances.cxb  | WT          | 5         | WT_5        | 28375200.00 | 32194900.00 | 0.90           | 1.00           |
| 7 /n/rinn_data1/seq/lgoft/Projects/BrainMap/data/quants/JR761/abundances.cxb  | WT          | 6         | WT_6        | 31706200.00 | 32194900.00 | 0.98           | 1.00           |
| 8 /n/rinn_data1/seq/lgoft/Projects/BrainMap/data/quants/JR815/abundances.cxb  | WT          | 7         | WT_7        | 29733100.00 | 32194900.00 | 0.93           | 1.00           |
| 9 /n/rinn_data1/seq/lgoft/Projects/BrainMap/data/quants/JR789/abundances.cxb  | WT          | 8         | WT_8        | 27681500.00 | 32194900.00 | 0.86           | 1.00           |
| 10 /n/rinn_data1/seq/lgoft/Projects/BrainMap/data/quants/JR748/abundances.cxb | WT          | 9         | WT_9        | 32367000.00 | 32194900.00 | 0.96           | 1.00           |
| 11 /n/rinn_data1/seq/lgoft/Projects/BrainMap/data/quants/JR716/abundances.cxb | WT          | 10        | WT_10       | 26144700.00 | 32194900.00 | 0.81           | 1.00           |
| 12 /n/rinn_data1/seq/lgoft/Projects/BrainMap/data/quants/JR717/abundances.cxb | WT          | 11        | WT_11       | 25565400.00 | 32194900.00 | 0.80           | 1.00           |
| 13 /n/rinn_data1/seq/lgoft/Projects/BrainMap/data/quants/JR719/abundances.cxb | WT          | 12        | WT_12       | 22697800.00 | 32194900.00 | 0.69           | 1.00           |
| 14 /n/rinn_data1/seq/lgoft/Projects/BrainMap/data/quants/JR756/abundances.cxb | WT          | 13        | WT_13       | 38948900.00 | 32194900.00 | 1.22           | 1.00           |
| 15 /n/rinn_data1/seq/lgoft/Projects/BrainMap/data/quants/JR809/abundances.cxb | linc_Cox2   | 0         | linc_Cox2_0 | 36051200.00 | 32194900.00 | 1.11           | 1.00           |
| 16 /n/rinn_data1/seq/lgoft/Projects/BrainMap/data/quants/JR816/abundances.cxb | linc_Cox2   | 1         | linc_Cox2_1 | 31829200.00 | 32194900.00 | 0.98           | 1.00           |
| 17 /n/rinn_data1/seq/lgoft/Projects/BrainMap/data/quants/JR829/abundances.cxb | linc_Cox2   | 2         | linc_Cox2_2 | 30833100.00 | 32194900.00 | 0.95           | 1.00           |

## Session Info

```
## R version 3.0.2 (2013-09-25)
## Platform: x86_64-unknown-linux-gnu (64-bit)
##
## locale:
## [1] LC_CTYPE=en_US.UTF-8      LC_NUMERIC=C
## [3] LC_TIME=en_US.UTF-8      LC_COLLATE=en_US.UTF-8
## [5] LC_MONETARY=en_US.UTF-8  LC_MESSAGES=en_US.UTF-8
## [7] LC_PAPER=en_US.UTF-8     LC_NAME=C
## [9] LC_ADDRESS=C             LC_TELEPHONE=C
## [11] LC_MEASUREMENT=en_US.UTF-8 LC_IDENTIFICATION=C
##
## attached base packages:
## [1] grid      parallel  methods  stats     graphics  grDevices  utils
## [8] datasets  base
##
## other attached packages:
## [1] plyr_1.8.1
## [2] stringr_0.6.2
## [3] seqbias_1.10.0
```

```

## [4] BSgenome.Mmusculus.UCSC.mm10_1.3.19
## [5] BSgenome_1.30.0
## [6] Biostrings_2.30.1
## [7] gdata_2.13.3
## [8] GO.db_2.10.1
## [9] org.Mm.eg.db_2.10.1
## [10] clusterProfiler_1.13.1
## [11] DOSE_2.0.0
## [12] ReactomePA_1.6.1
## [13] AnnotationDbi_1.24.0
## [14] Biobase_2.22.0
## [15] mgcv_1.7-29
## [16] nlme_3.1-117
## [17] RMySQL_0.9-3
## [18] RColorBrewer_1.0-5
## [19] gridExtra_0.9.1
## [20] gtable_0.1.2
## [21] marray_1.40.0
## [22] gplots_2.13.0
## [23] GSA_1.03
## [24] limma_3.18.13
## [25] xtable_1.7-3
## [26] cummeRbund_2.7.2
## [27] Gviz_1.6.0
## [28] rtracklayer_1.22.7
## [29] GenomicRanges_1.14.4
## [30] XVector_0.2.0
## [31] IRanges_1.20.7
## [32] fastcluster_1.1.13
## [33] reshape2_1.4
## [34] ggplot2_1.0.0
## [35] RSQLite_0.11.4
## [36] DBI_0.2-7
## [37] BiocGenerics_0.8.0
## [38] knitr_1.6
##
## loaded via a namespace (and not attached):
## [1] biomaRt_2.18.0      biovizBase_1.10.8   bitops_1.0-6
## [4] caTools_1.17        cluster_1.15.2      colorspace_1.2-4
## [7] dichromat_2.0-0     digest_0.6.4        DO.db_2.7
## [10] evaluate_0.5.5      formatR_0.10        Formula_1.1-1
## [13] GenomicFeatures_1.14.5 GOSemSim_1.20.3     graph_1.40.1
## [16] graphite_1.8.1      gtools_3.4.1        Hmisc_3.14-4
## [19] igraph_0.7.1        KEGG.db_2.10.1     KernSmooth_2.23-12
## [22] labeling_0.2        lattice_0.20-29     latticeExtra_0.6-26
## [25] MASS_7.3-33         Matrix_1.1-3        munsell_0.4.2
## [28] org.Hs.eg.db_2.10.1 proto_0.3-10        qvalue_1.36.0
## [31] Rcpp_0.11.2         RCurl_1.95-4.1     reactome.db_1.46.1
## [34] Rsamtools_1.14.3    scales_0.2.4        splines_3.0.2
## [37] stats4_3.0.2        survival_2.37-7     tcltk_3.0.2
## [40] tools_3.0.2         XML_3.98-1.1       zlibbioc_1.8.0

```

## Run Info

```
##          param
## 1      cmd_line
## 2          version
## 3  SVN_revision
## 4  boost_version
## 5          genome
##
## 1 cuffdiff -p 10 -L WT,linc-Cox2 -o /n/rinn_data1/seq/lgoff/Projects/BrainMap/data/diffs/linc-Cox2_vs_WT_Embryonic /n/rinn_data1/seq/lgoff/Projects/Brai
## 2
## 3
## 4
## 5
```

# linc-Enc1 KO vs WT (Adult)

This file shows the wt-v-ko comparison for linc-Enc1.

Cuff overview:

```
## CuffSet instance with:  
## 2 samples  
## 26754 genes  
## 77524 isoforms  
## 0 TSS  
## 23066 CDS  
## 0 promoters  
## 0 splicing  
## 19954 relCDS
```

## QC

### Dispersion

Dispersion plot for genes in cuff: (Overdispersion can lead to innacurate quants)

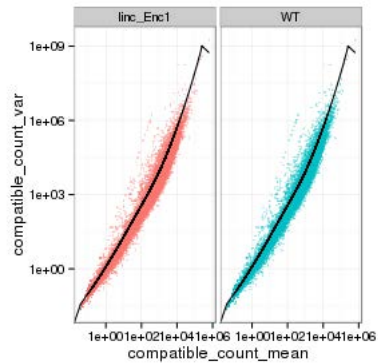

### Cross-replicate variability (fpkmSCVplot)

Differences in CV 2 can result in lower numbers of differentially expressed genes due to a higher degree of variability between replicate fpkm estimates.

Genes:

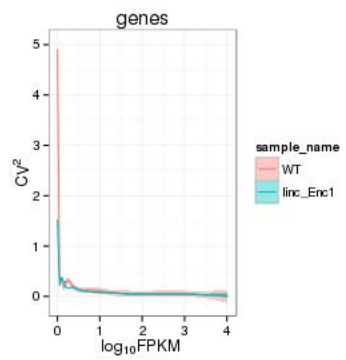

Isoforms:

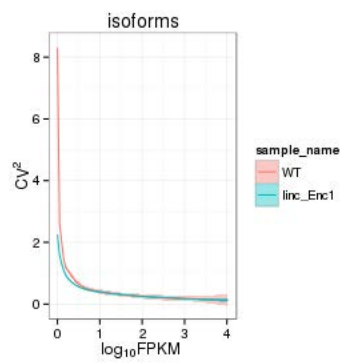

## MvA plot

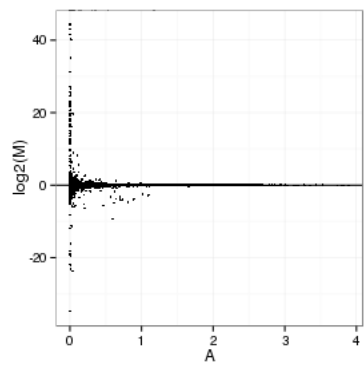

MvA plot counts



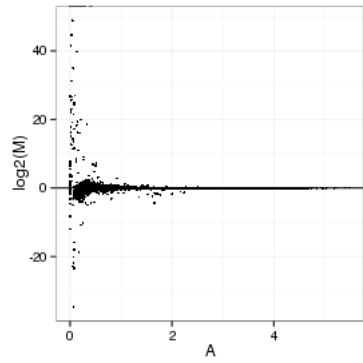

## Scatterplot matrix

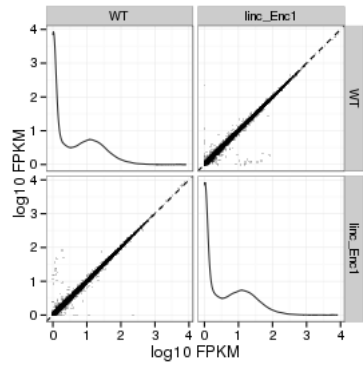

## Distributions

### Boxplots

Boxplot (genes)

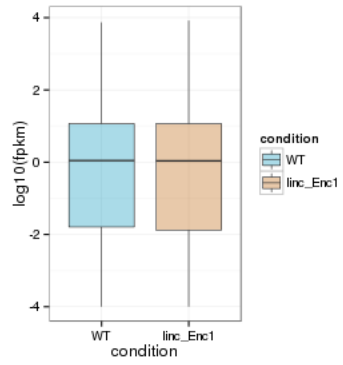

Boxplot (genes, replicates)

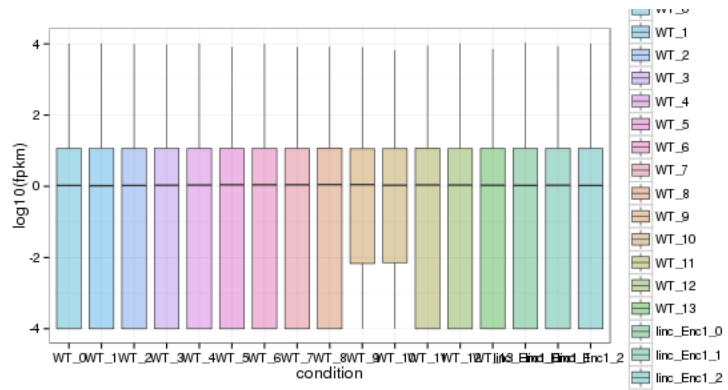

Boxplot (isoforms)

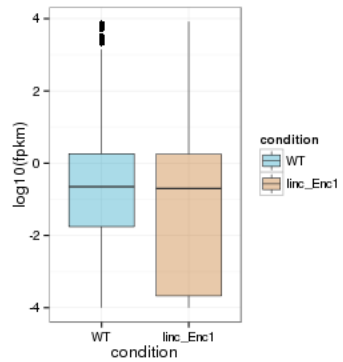

Boxplot (isoforms, replicates)

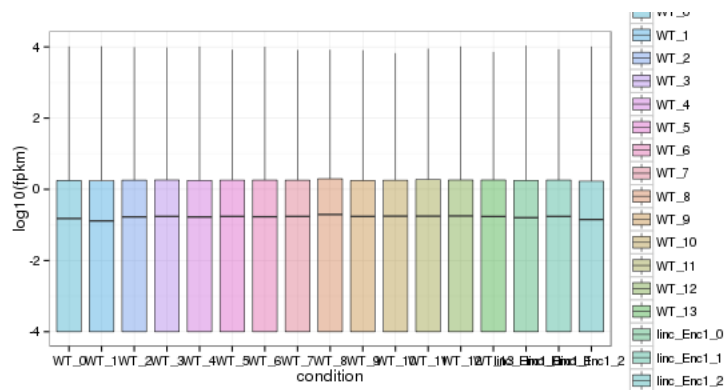

## Density

Density (genes)

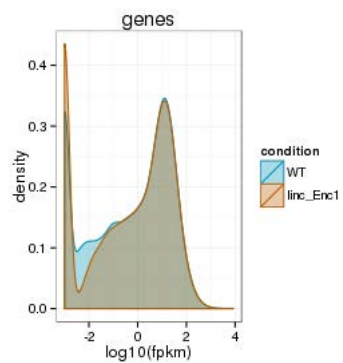

Density (genes, replicates)

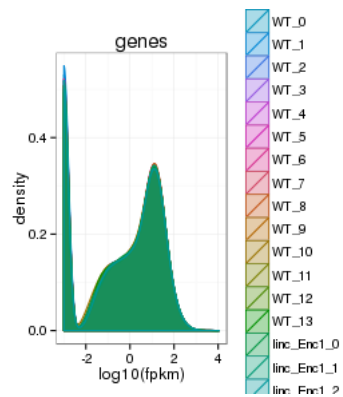

# Clustering

## Replicate Clusters

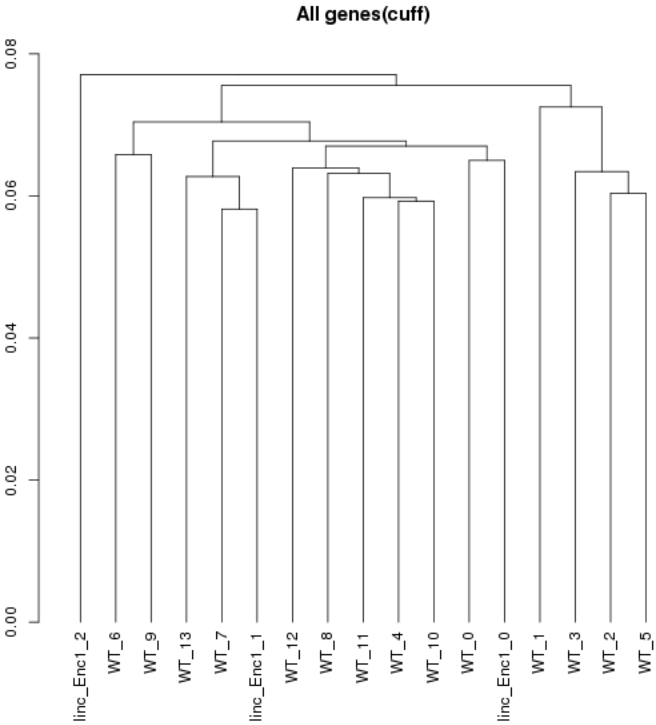

## NULL

## PCA (genes)



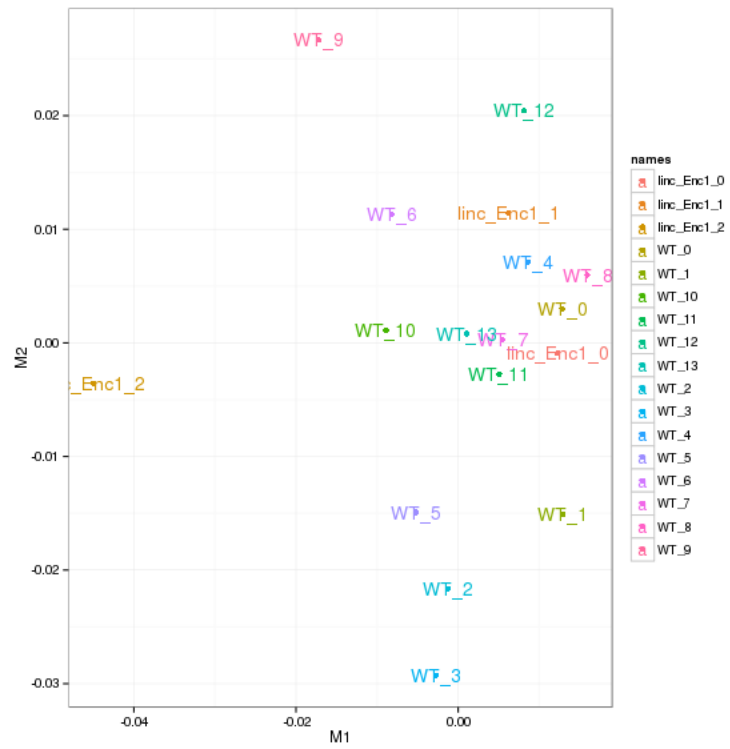

**KO assessment**  
**Endogenous lincRNA expression**

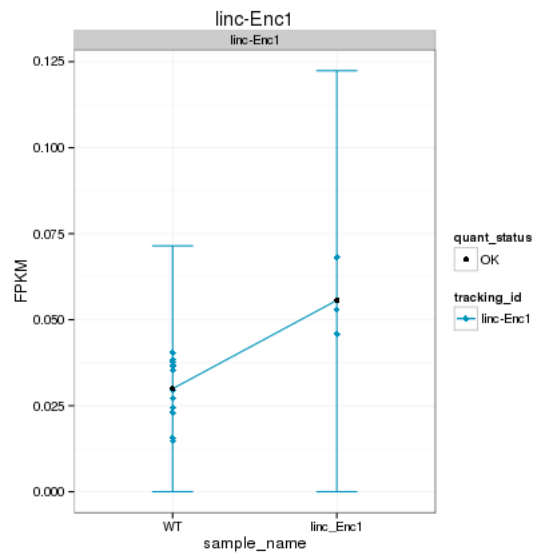

Endogenous expression of linc-Enc1 isoforms:

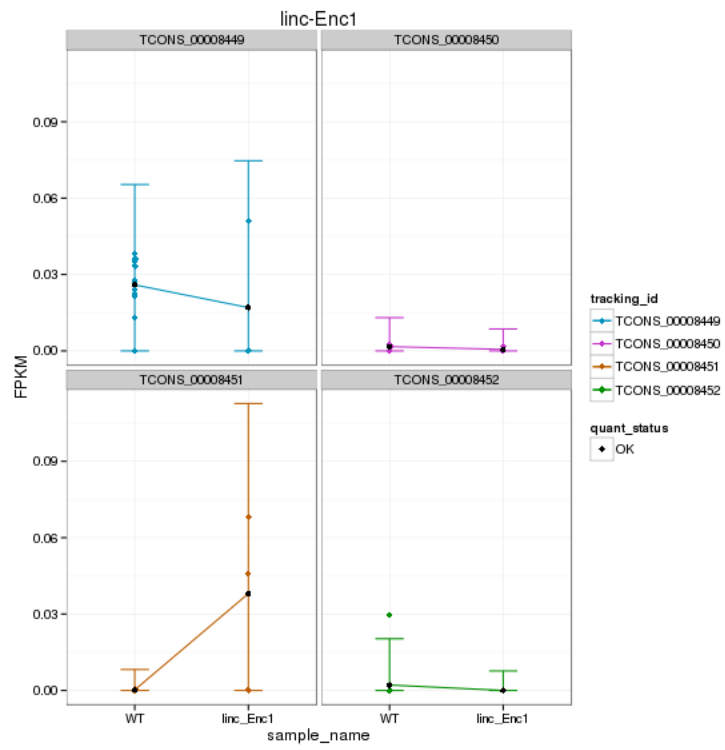

Barplot of gene expression:



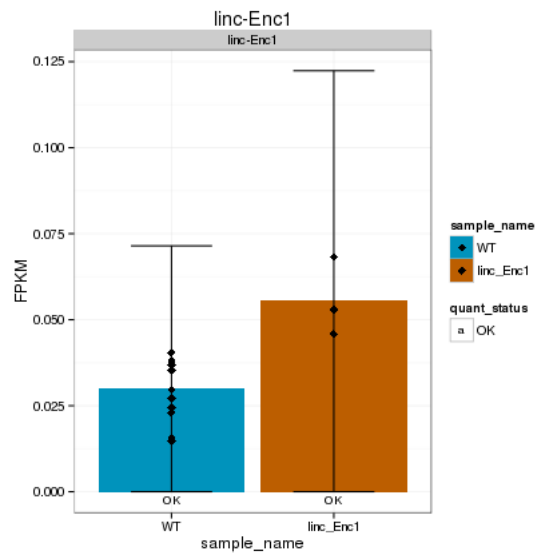

Barplot of isoform expression:

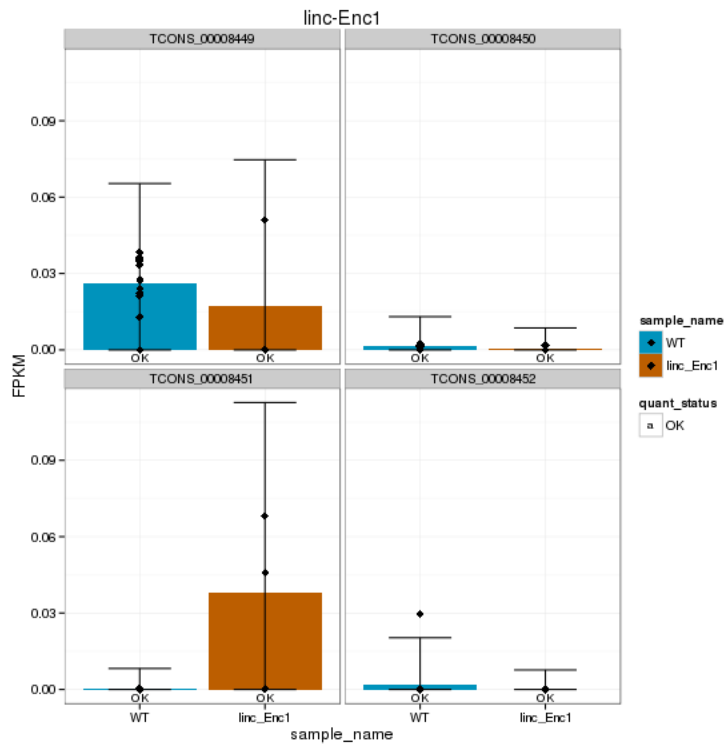

## LacZ expression

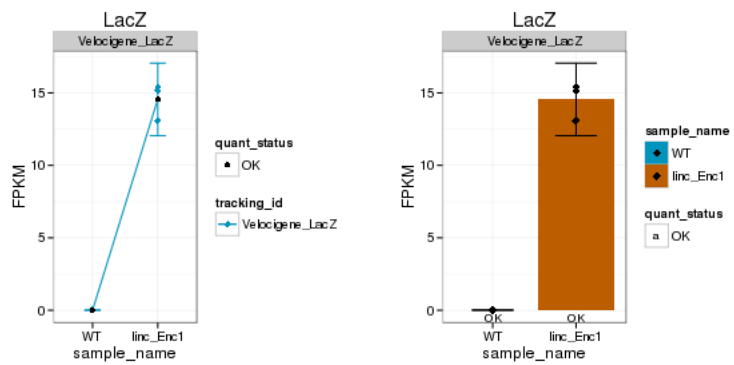

## Digital Genotyping (LacZ vs Endogenous IncRNA and Sex)

Eif2s3y is a y-expressed gene, Xist is an x-expressed gene Expression plot (endogenous linc, lacZ, Y-expressed gene):

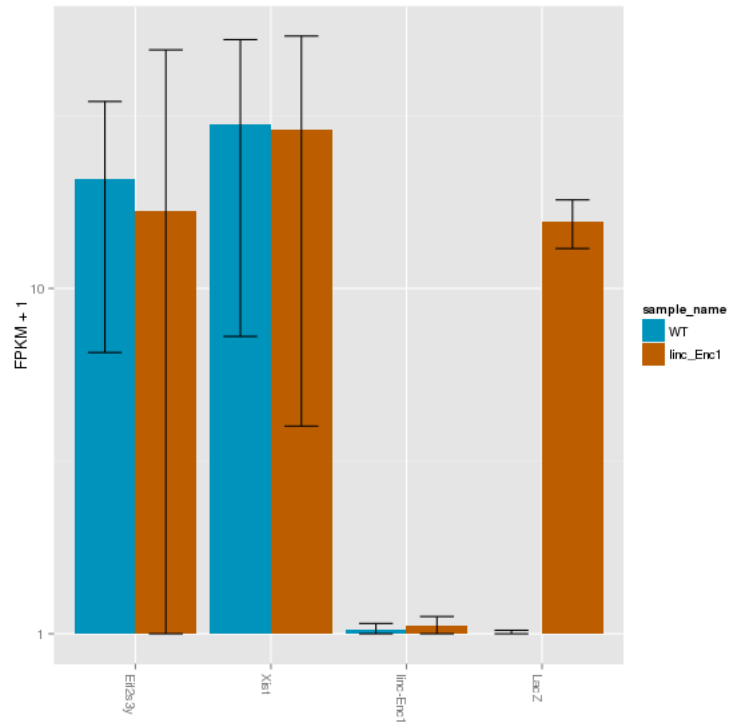

Expression heatmap:

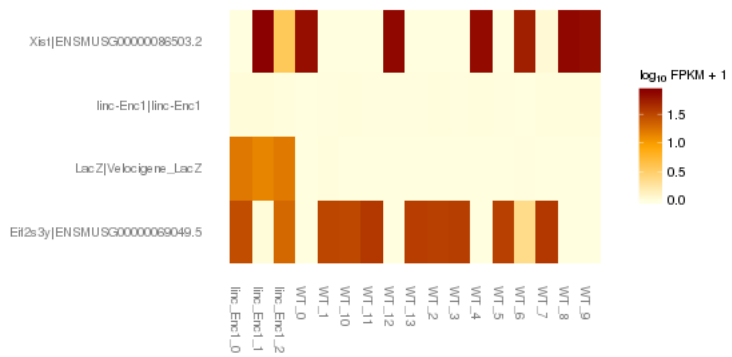

Track visualization

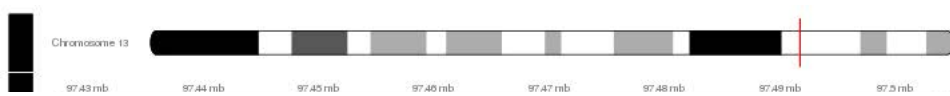

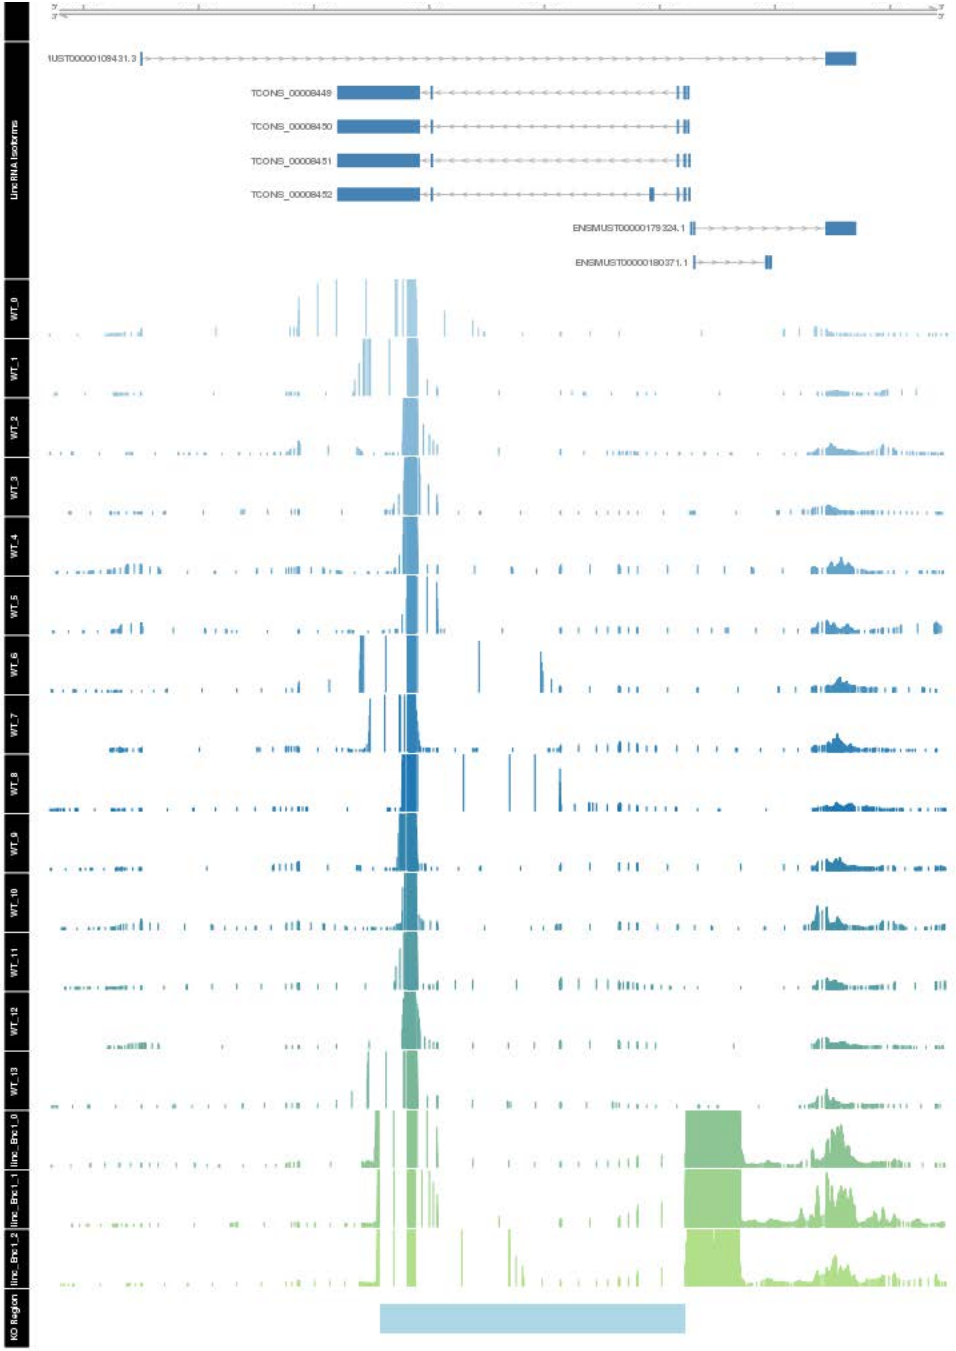

# Differential Analysis

## Differential Genes

There are 52 significantly differentially expressed genes. They are:

```
geneAnnot$gene_short_name
1 Nes
2 Dnajb1
3 Pttg1
4 Adi1
5 Psmb5
6 Arc
7 Mut
8 Glo1
9 Flnb
10 Nnt
11 Lcn2
12 Cyr61
13 Alad
14 Ugt2a1
15 Hddc3
16 Arhgap27
17 Tmem260
18 Hdhd3
19 Car8
20 Mup4
21 Enc1
22 Tuba1c
23 5430402E10Rik
24 Gm9493
25 Zfp488
26 Acp1
27 Cd24a
28 BC048546
29 Myh7
30 BC051076
31 Mup5
32 Cox5b
33 Rpl34
34 Obp2a
35 Obp1b
36 Obp1a
37 Bpifb9b
```

- 38 Bpifb3
- 39 Ppp1r3e
- 40 Gm7292
- 41 H2-BI
- 42 Ccl28
- 43 Gm2373
  
- 44 Gm14744
- 45 Obp2b
- 46 4930412C18Rik
- 47 Hspa1b
- 48 Hspa1a
- 49 AA465934
- 50 4930480K23Rik
- 51 Gm26825
- 52 Gm26924

### Matrix of gene significant differences between conditions

(skip for Brainmap wt-v-ko comparisons)

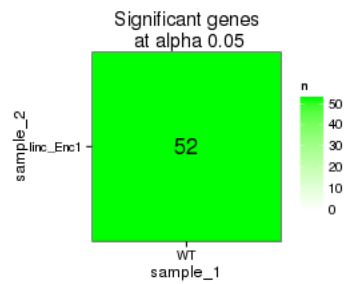

### Significant gene expression differences between conditions

Expression plot (genes):(turned off)

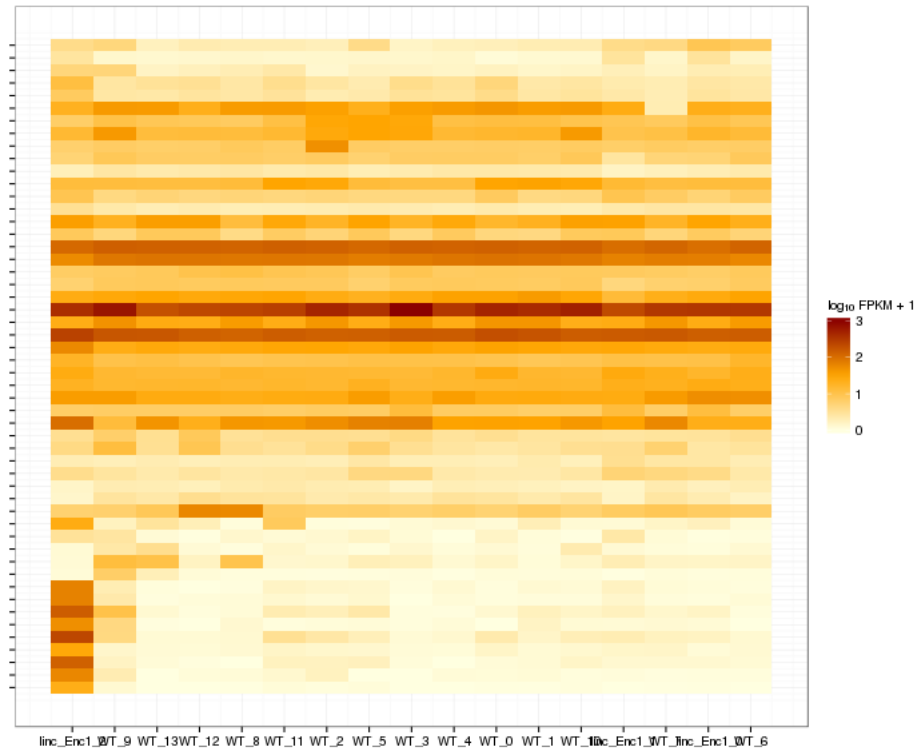

Significant genes with expression >50fpm (any condition):(turned off)

An individual look at each of the highly expressed significantly differentially regulated genes: (eval=false for first pass)

### Expression-level/significance relationship

Scatter plot of significant genes only:

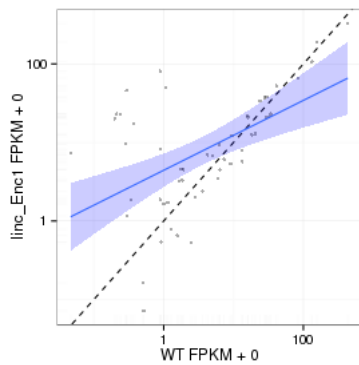

### Volcano Plot

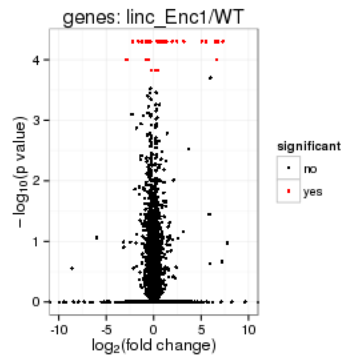

### Volcano plot with significant genes only:

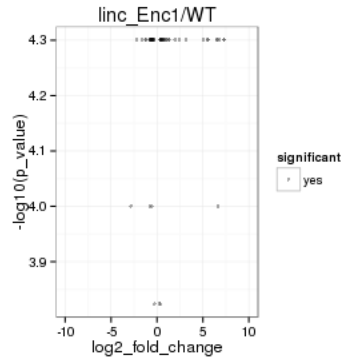

### FoldChange Heatmap



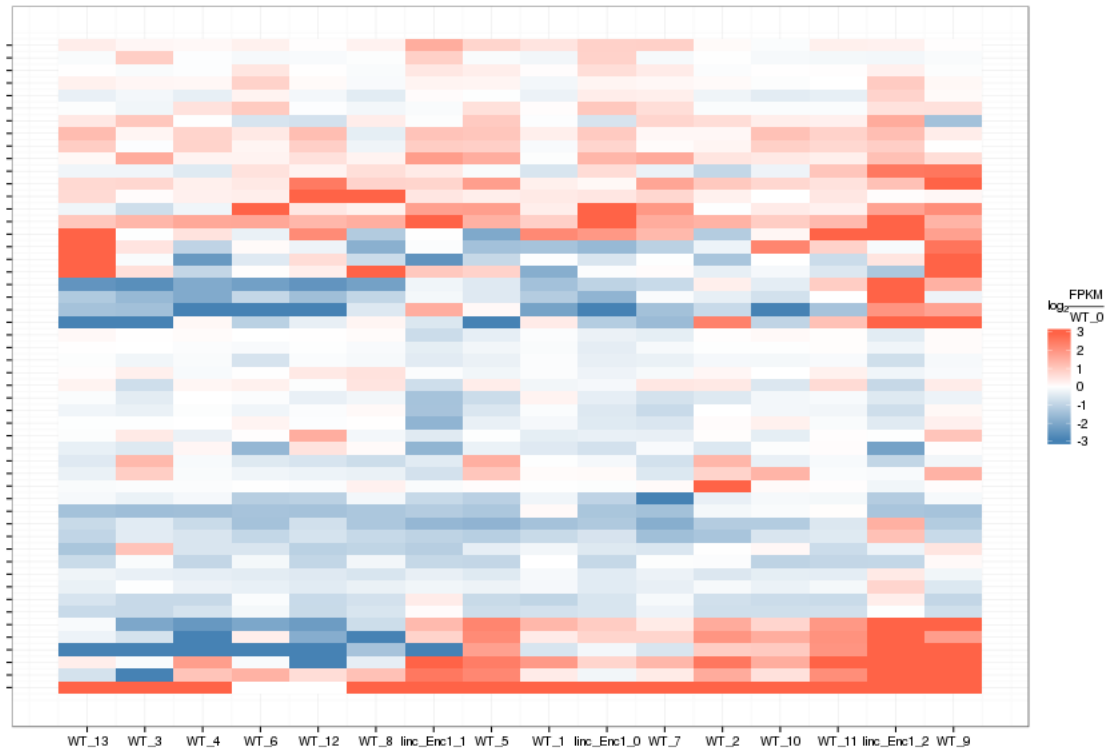

## Differential Splicing

### Differential Isoforms between conditions

Per isoform difference between conditions:

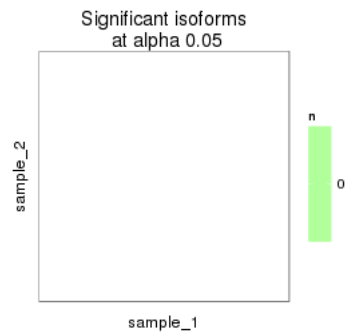

These isoforms are:

[1] "no sig isoforms"

Gene-level DE isoform heatmap

```
## [1] "no sig isoforms"
```

Isoform foldchange heatmap by isoform:

```
## [1] "no sig isoforms"
```

## Differential Splicing between conditions

(eval false for first pass)

Per condition differences in isoforms (Does gene have diff piechart between conditions?)

These genes are:

Splicing heatmap by isoform:

Splicing heatmap by gene

The following are significantly differentially spliced genes (relative portion of isoform per condition):

# Gene/Pathway Analysis

## GSEA

Enrichment and zscores are calculated based on expression in KO vs WT (fpkmKO/fpkmWT), so genes that are down regulated in KO are shown in blue, while upregulation is shown in red.

KO/WT Blue = down in KO Red = Up in KO

Biocarta enrichment:

```
## Error: `x` must have at least 2 rows and 2 columns
```

Biocarta zscore:

```
## Error: incorrect number of dimensions
```

```
## Error: object 'x_ordered' not found
```

```
## Error: error in evaluating the argument 'x' in selecting a method for function 'as.matrix': Error: object 'x_ordered' not found
```

```
## Error: object 'x_ordered' not found
```

Reactome enrichment:

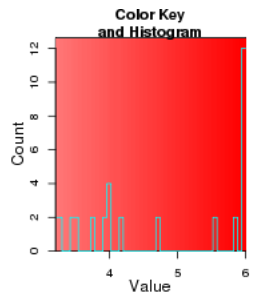

\_\_\_\_\_

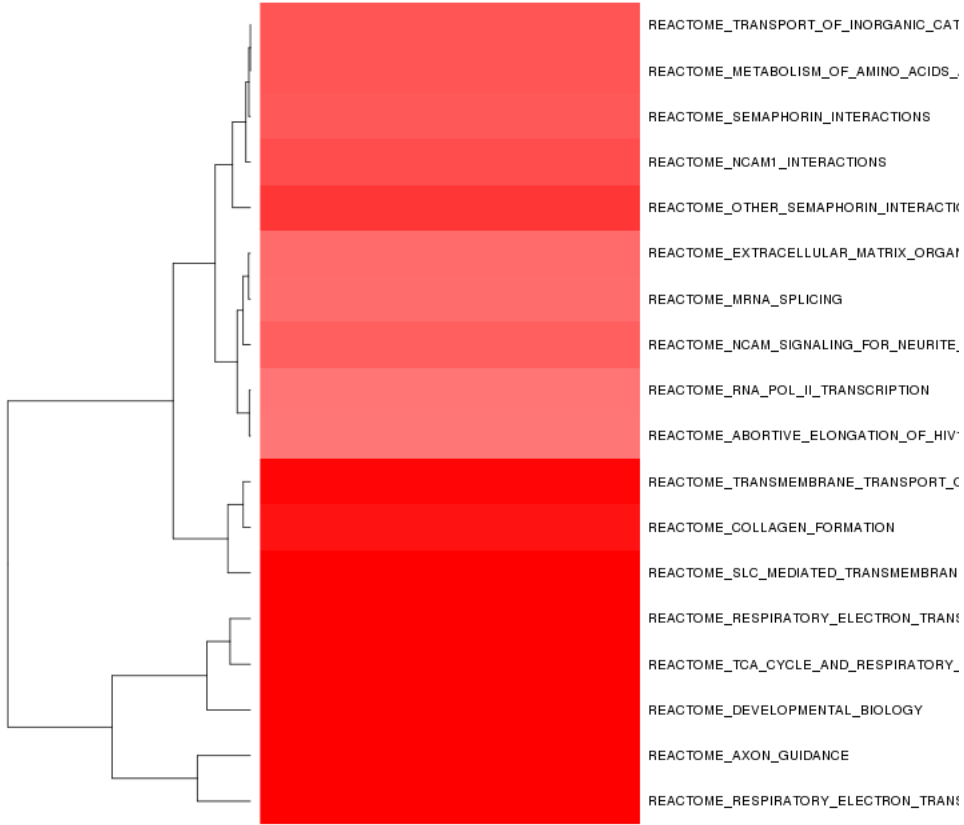

Reactome zscore:

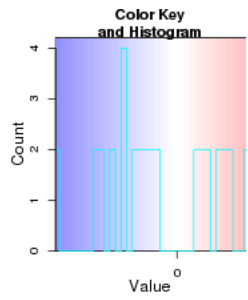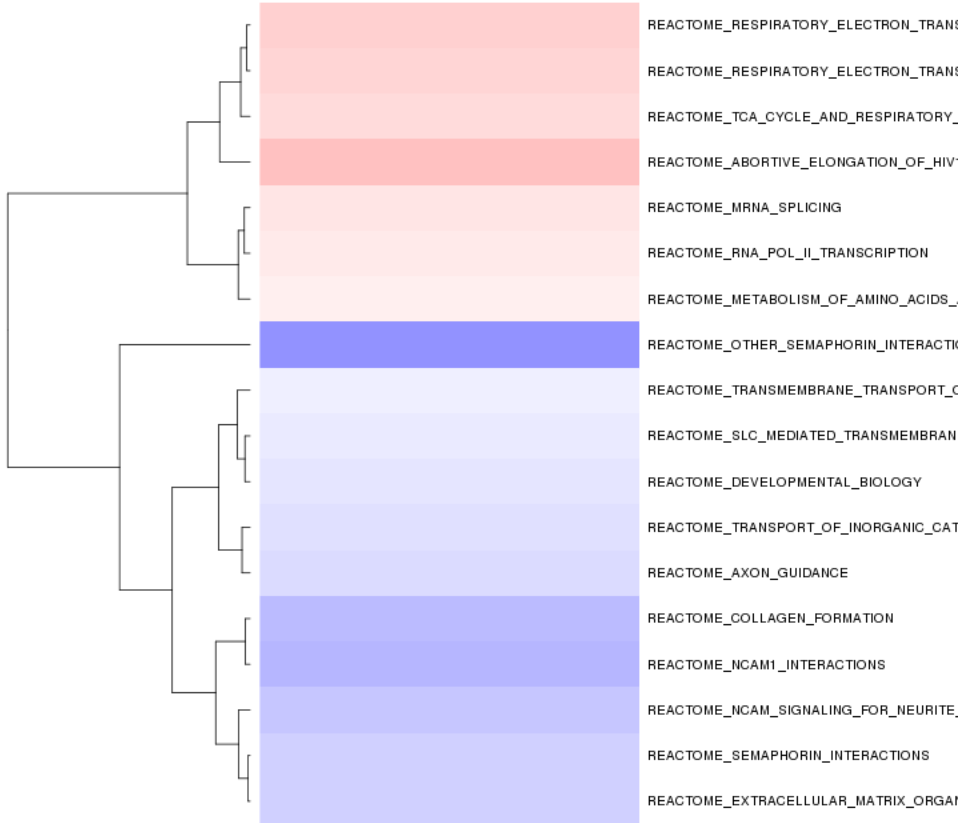

Kegg enrichment:

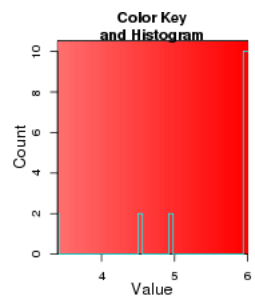

\_\_\_\_\_

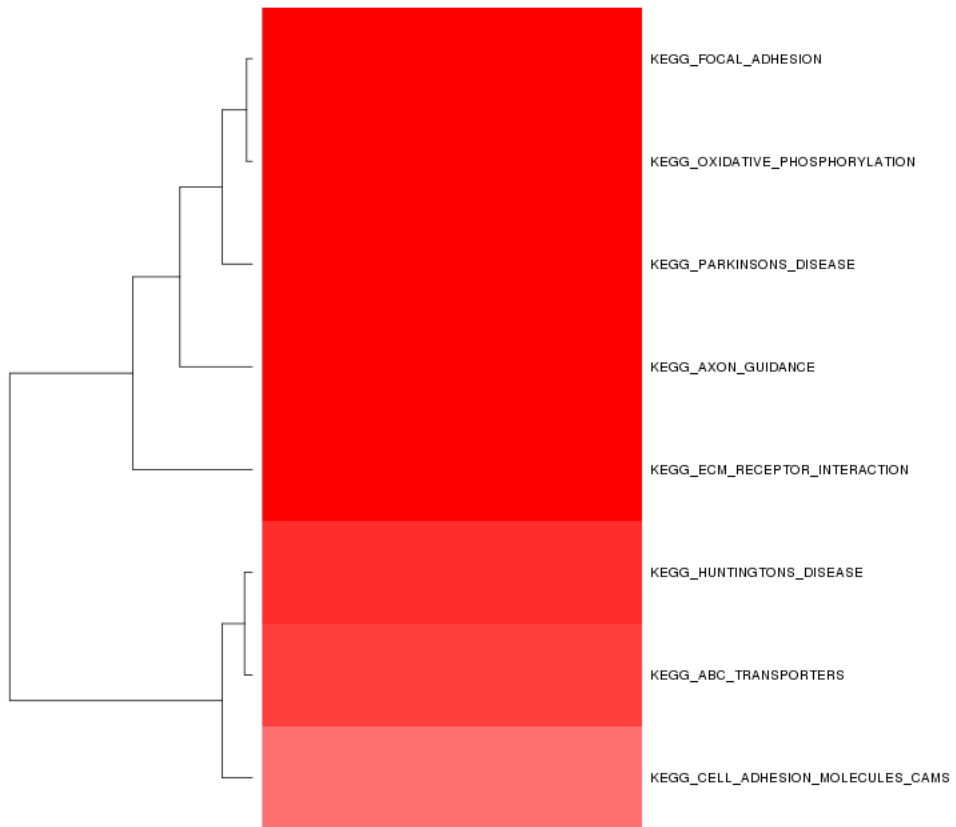

Kegg zscore:

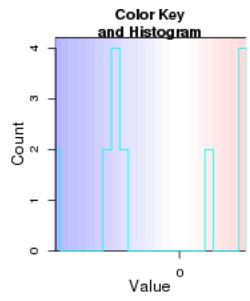

\_\_\_\_\_

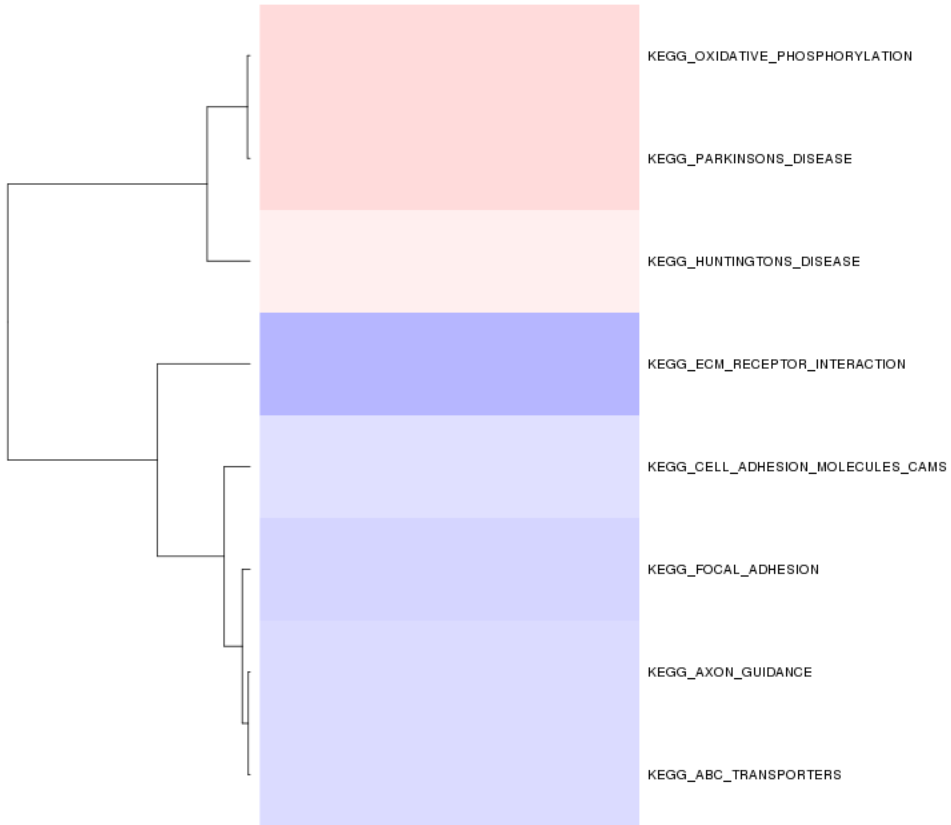

Interneuron enrichment:

## Error: no locations are finite

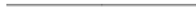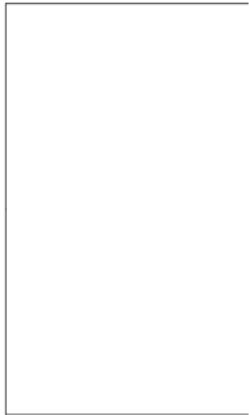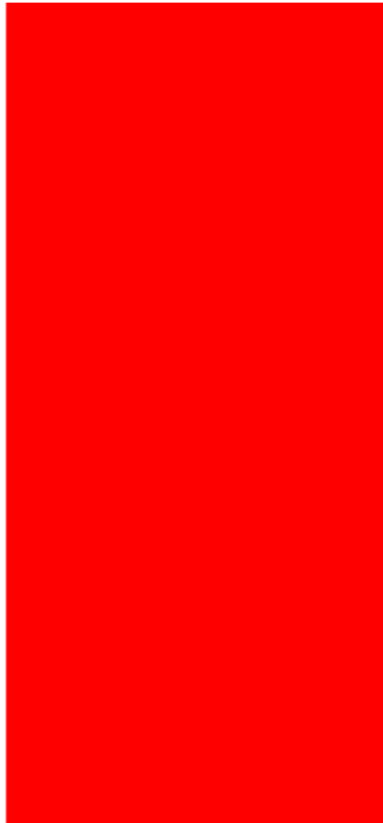

5HT\_genes

Lhx0\_genes

Interneuron zscore:

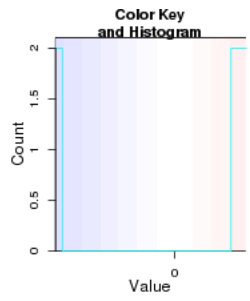

\_\_\_\_\_

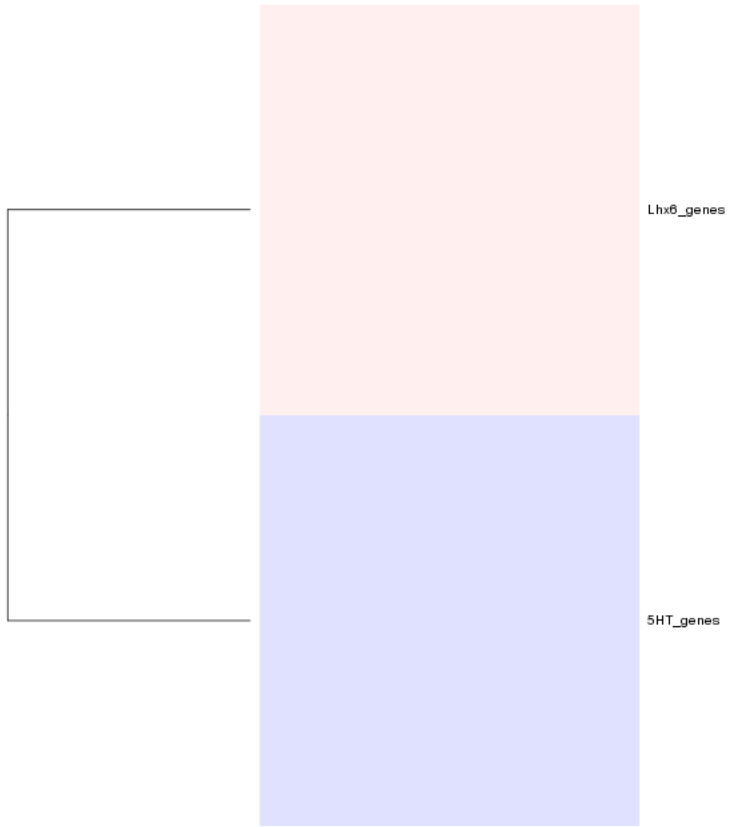

Oncogene enrichment:



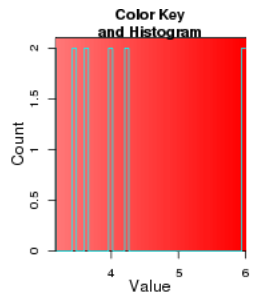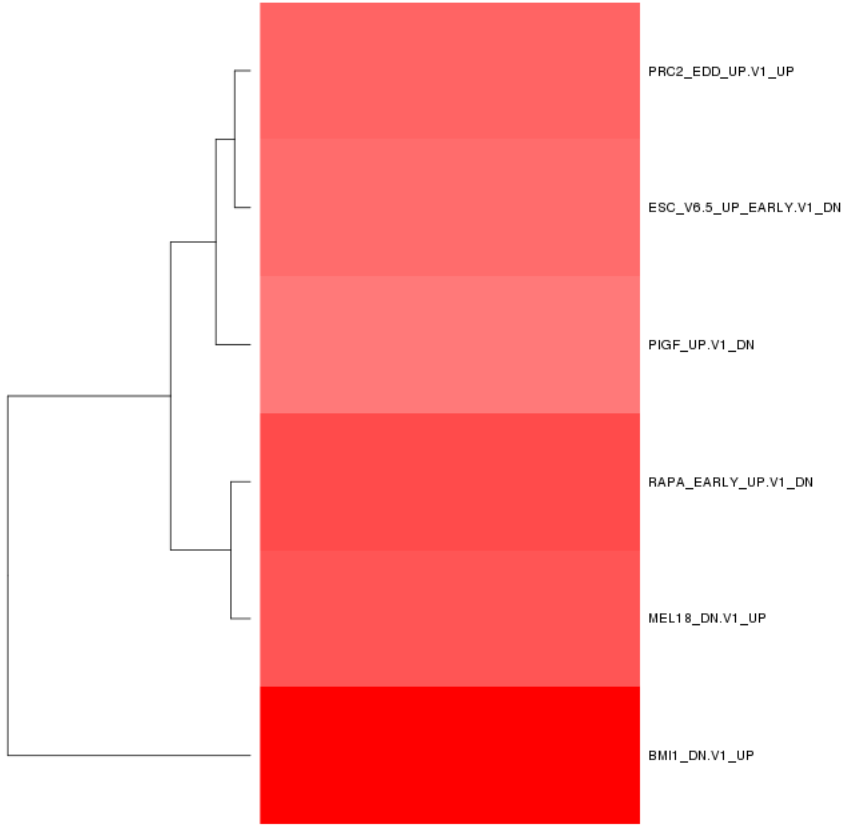

Oncogene zscore:

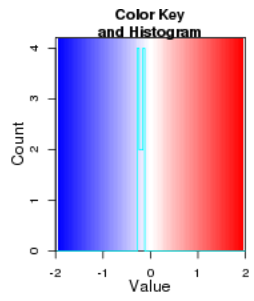

\_\_\_\_\_

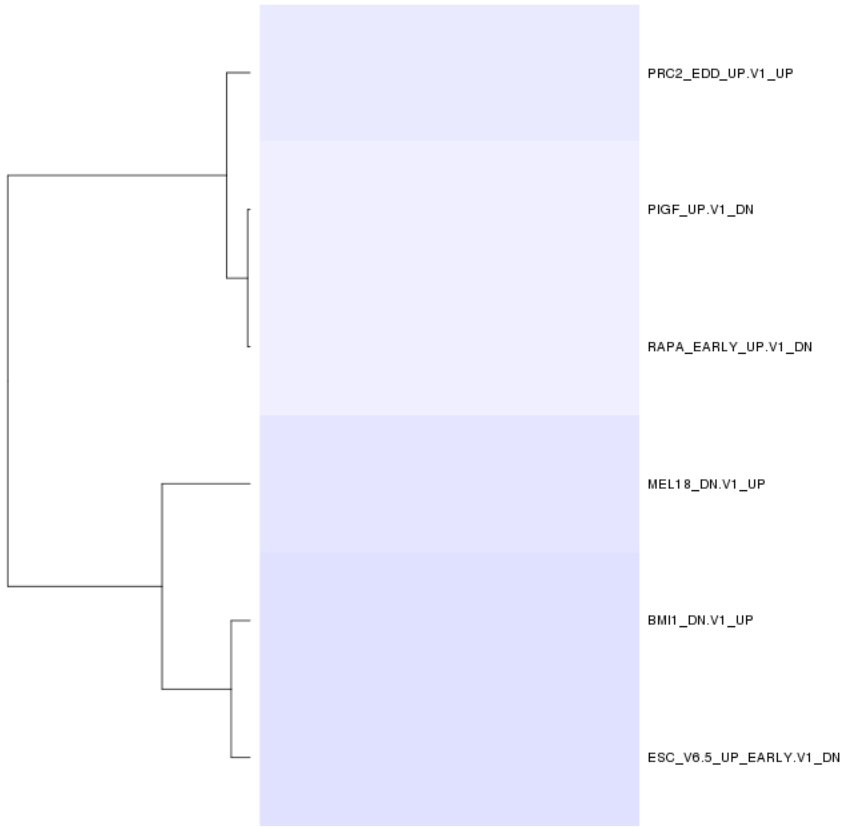

Immuno enrichment:

## Error: subscript out of bounds



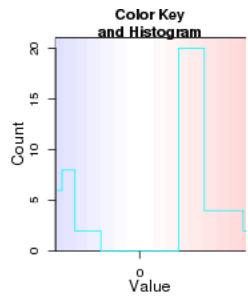

\_\_\_\_\_

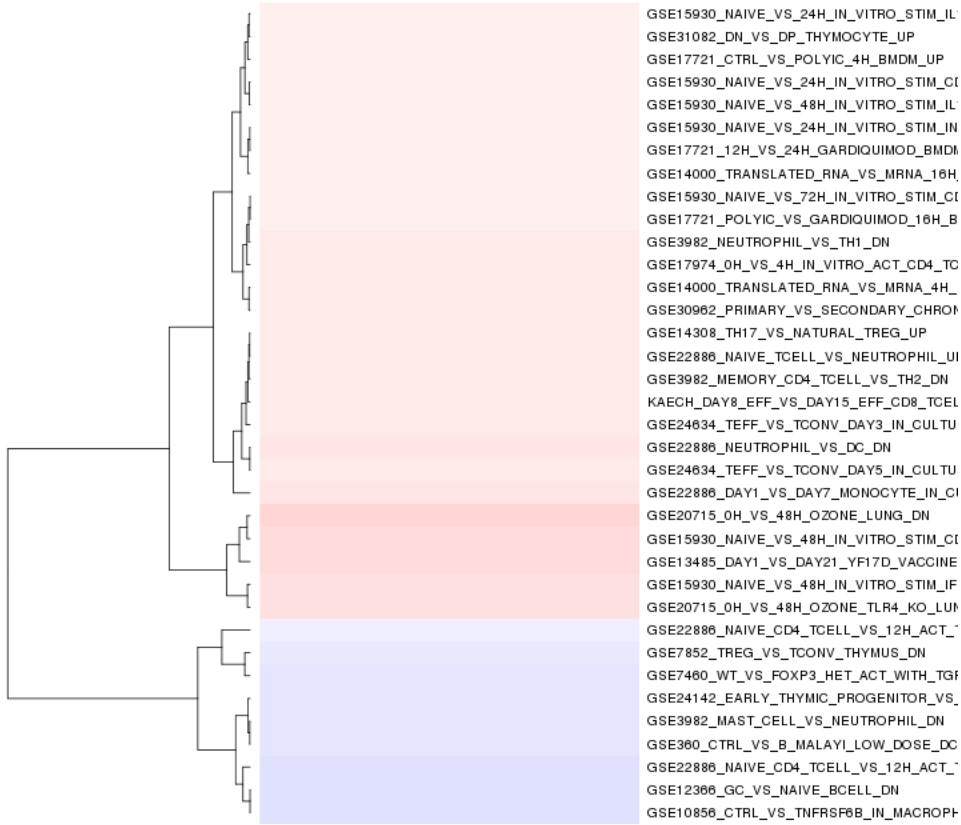

TF enrichment:

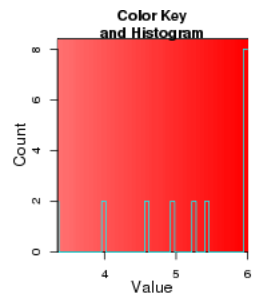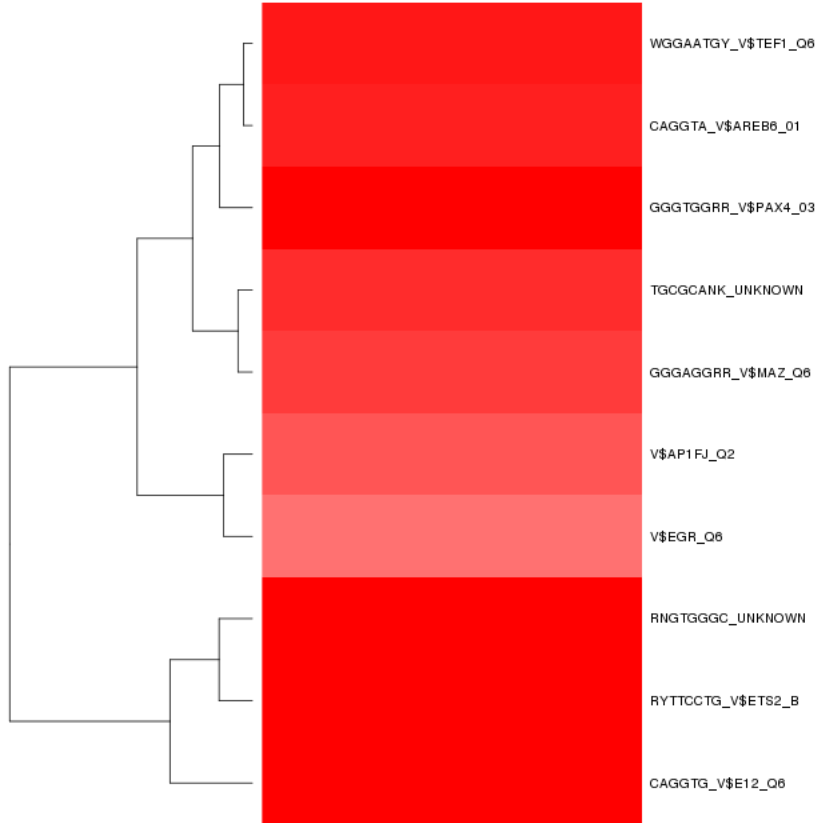

TF zscore:

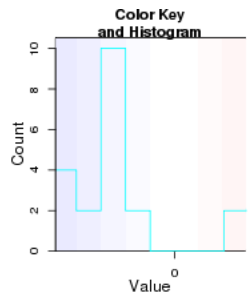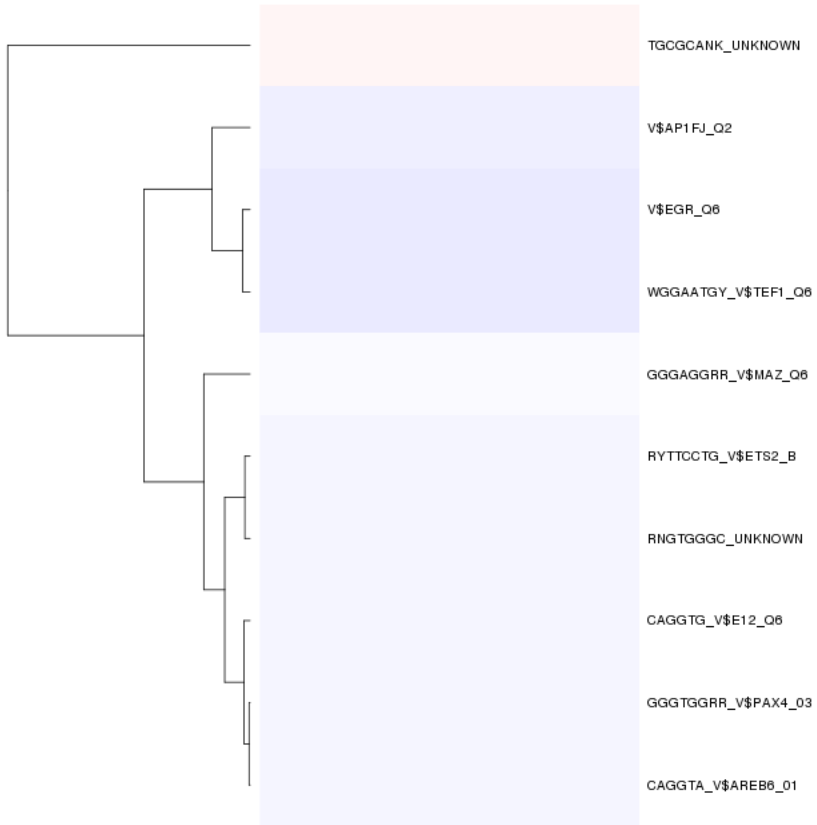

## GO enrichment

Cluster profiler used to call enrichments of significantly differentially regulated genes that map to Entrez IDs.

```
## Error: 'x' and 'units' must have length > 0
```

```
## Error: 'x' and 'units' must have length > 0
```

```
## Error: 'x' and 'units' must have length > 0
```

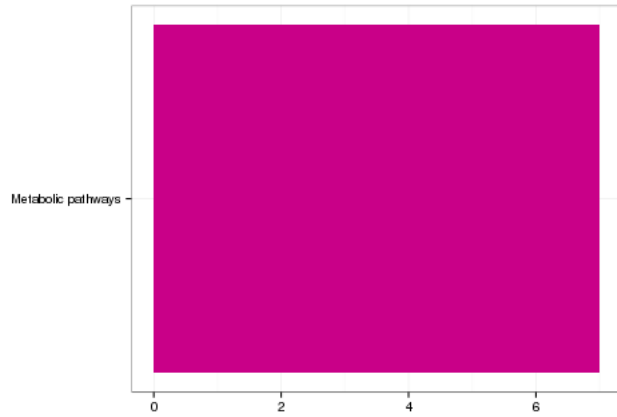

```
## Error: 'x' and 'units' must have length > 0
```

**Enrichment or depletion for stage-specific cell cycle markers**





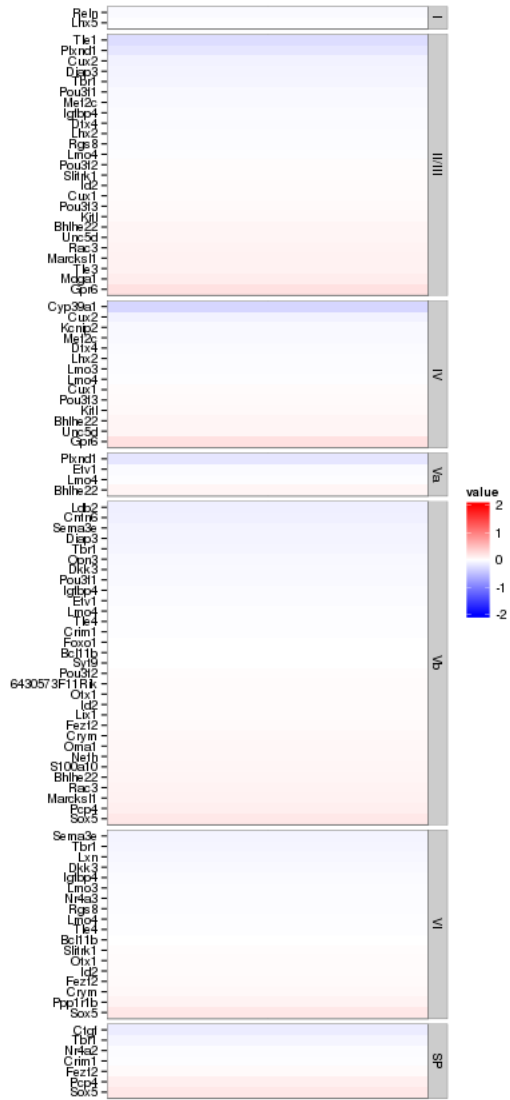

Enrichment or depletion for specific neural cell types

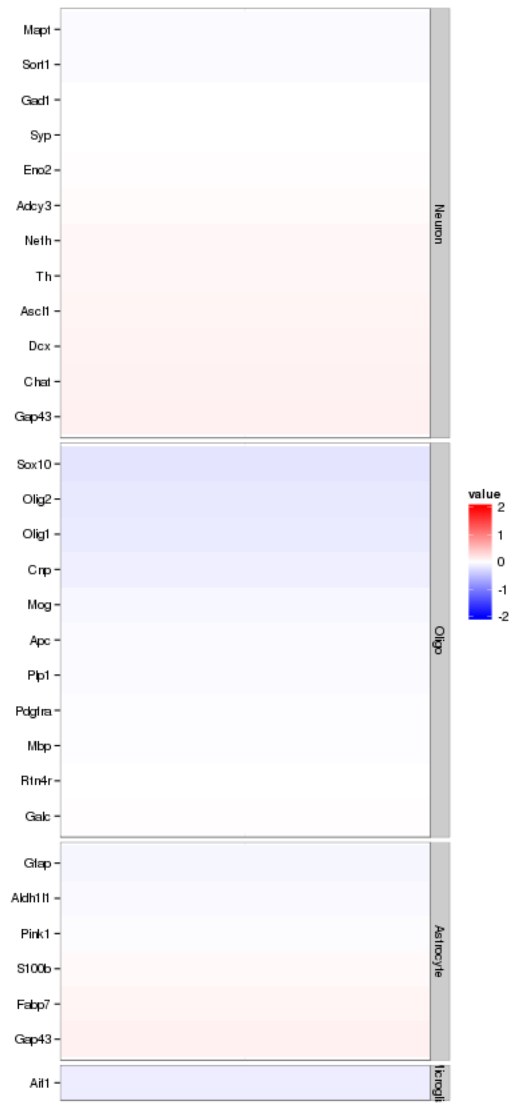

**Enrichment or Depletion of neural differentiation markers**

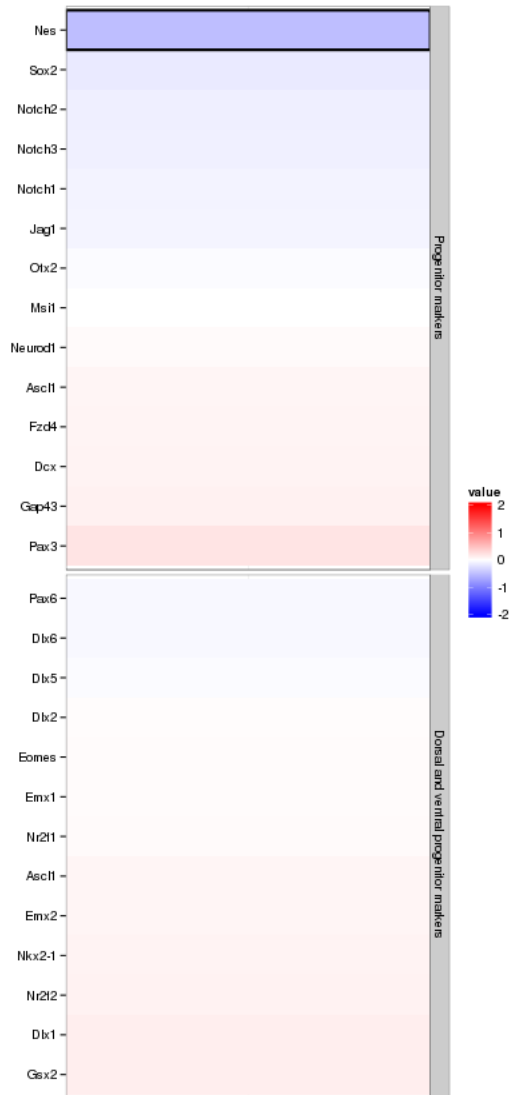

## Cis vs Trans (locally)

$\log_2$  Foldchange and test statistic are calculated with the ratio of  $\text{fpkm(KO)}/\text{fpkm(WT)}$ , thus the test\_stat is positive if a gene is higher in the KO and negative if a gene has lower expression in the KO

The pvalue for 1 genes significantly regulated in a region this size is: 0.0947

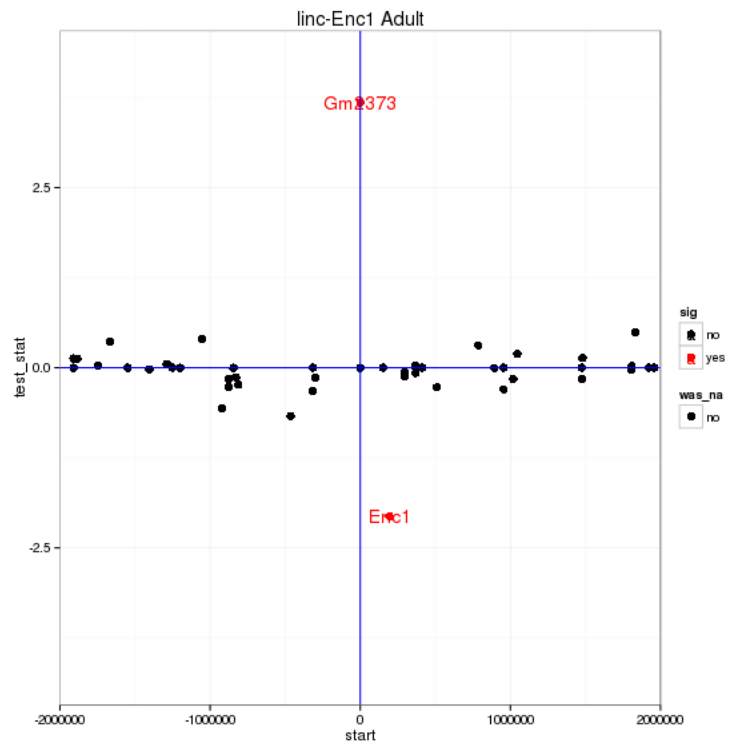

## Notes

Samples used are:

10

- 1 JR729
- 2 JR728
- 3 JR796
- 4 JR797
- 5 JR740
- 6 JR800
- 7 JR827
- 8 JR778
- 9 JR734
- 10 JR802
- 11 JR803
- 12 JR735
- 13 JR785
- 14 JR781

15 JR736  
16 JR779  
17 JR825

## Replicates

| file                                                                          | sample_name | replicate | rep_name    | total_mass  | norm_mass   | internal_scale | external_scale |
|-------------------------------------------------------------------------------|-------------|-----------|-------------|-------------|-------------|----------------|----------------|
| 1 /n/rinn_data1/seq/Igoff/Projects/BrainMap/data/quants/JR729/abundances.cxb  | WT          | 0         | WT_0        | 26334400.00 | 34110000.00 | 0.77           | 1.00           |
| 2 /n/rinn_data1/seq/Igoff/Projects/BrainMap/data/quants/JR728/abundances.cxb  | WT          | 1         | WT_1        | 20329200.00 | 34110000.00 | 0.59           | 1.00           |
| 3 /n/rinn_data1/seq/Igoff/Projects/BrainMap/data/quants/JR796/abundances.cxb  | WT          | 2         | WT_2        | 34089000.00 | 34110000.00 | 1.00           | 1.00           |
| 4 /n/rinn_data1/seq/Igoff/Projects/BrainMap/data/quants/JR797/abundances.cxb  | WT          | 3         | WT_3        | 28103300.00 | 34110000.00 | 0.82           | 1.00           |
| 5 /n/rinn_data1/seq/Igoff/Projects/BrainMap/data/quants/JR740/abundances.cxb  | WT          | 4         | WT_4        | 35808200.00 | 34110000.00 | 1.05           | 1.00           |
| 6 /n/rinn_data1/seq/Igoff/Projects/BrainMap/data/quants/JR800/abundances.cxb  | WT          | 5         | WT_5        | 37012200.00 | 34110000.00 | 1.09           | 1.00           |
| 7 /n/rinn_data1/seq/Igoff/Projects/BrainMap/data/quants/JR827/abundances.cxb  | WT          | 6         | WT_6        | 27786600.00 | 34110000.00 | 0.82           | 1.00           |
| 8 /n/rinn_data1/seq/Igoff/Projects/BrainMap/data/quants/JR778/abundances.cxb  | WT          | 7         | WT_7        | 39541900.00 | 34110000.00 | 1.17           | 1.00           |
| 9 /n/rinn_data1/seq/Igoff/Projects/BrainMap/data/quants/JR734/abundances.cxb  | WT          | 8         | WT_8        | 34480600.00 | 34110000.00 | 1.03           | 1.00           |
| 10 /n/rinn_data1/seq/Igoff/Projects/BrainMap/data/quants/JR802/abundances.cxb | WT          | 9         | WT_9        | 45467400.00 | 34110000.00 | 1.32           | 1.00           |
| 11 /n/rinn_data1/seq/Igoff/Projects/BrainMap/data/quants/JR803/abundances.cxb | WT          | 10        | WT_10       | 52130400.00 | 34110000.00 | 1.53           | 1.00           |
| 12 /n/rinn_data1/seq/Igoff/Projects/BrainMap/data/quants/JR735/abundances.cxb | WT          | 11        | WT_11       | 34994400.00 | 34110000.00 | 1.03           | 1.00           |
| 13 /n/rinn_data1/seq/Igoff/Projects/BrainMap/data/quants/JR785/abundances.cxb | WT          | 12        | WT_12       | 34173600.00 | 34110000.00 | 0.99           | 1.00           |
| 14 /n/rinn_data1/seq/Igoff/Projects/BrainMap/data/quants/JR781/abundances.cxb | WT          | 13        | WT_13       | 41538900.00 | 34110000.00 | 1.23           | 1.00           |
| 15 /n/rinn_data1/seq/Igoff/Projects/BrainMap/data/quants/JR736/abundances.cxb | linc_Enc1   | 0         | linc_Enc1_0 | 30101500.00 | 34110000.00 | 0.88           | 1.00           |
| 16 /n/rinn_data1/seq/Igoff/Projects/BrainMap/data/quants/JR779/abundances.cxb | linc_Enc1   | 1         | linc_Enc1_1 | 38936900.00 | 34110000.00 | 1.14           | 1.00           |
| 17 /n/rinn_data1/seq/Igoff/Projects/BrainMap/data/quants/JR825/abundances.cxb | linc_Enc1   | 2         | linc_Enc1_2 | 33174000.00 | 34110000.00 | 0.96           | 1.00           |

## Session Info

```
## R version 3.0.2 (2013-09-25)
## Platform: x86_64-unknown-linux-gnu (64-bit)
##
## locale:
## [1] LC_CTYPE=en_US.UTF-8      LC_NUMERIC=C
## [3] LC_TIME=en_US.UTF-8      LC_COLLATE=en_US.UTF-8
## [5] LC_MONETARY=en_US.UTF-8  LC_MESSAGES=en_US.UTF-8
## [7] LC_PAPER=en_US.UTF-8     LC_NAME=C
## [9] LC_ADDRESS=C             LC_TELEPHONE=C
## [11] LC_MEASUREMENT=en_US.UTF-8 LC_IDENTIFICATION=C
##
## attached base packages:
## [1] grid      parallel  methods  stats    graphics  grDevices  utils
## [8] datasets  base
##
## other attached packages:
## [1] plyr_1.8.1
## [2] stringr_0.6.2
## [3] seqbias_1.10.0
```

```

## [4] BSgenome.Mmusculus.UCSC.mm10_1.3.19
## [5] BSgenome_1.30.0
## [6] Biostrings_2.30.1
## [7] gdata_2.13.3
## [8] GO.db_2.10.1
## [9] org.Mm.eg.db_2.10.1
## [10] clusterProfiler_1.13.1
## [11] DOSE_2.0.0
## [12] ReactomePA_1.6.1
## [13] AnnotationDbi_1.24.0
## [14] Biobase_2.22.0
## [15] mgcv_1.7-29
## [16] nlme_3.1-117
## [17] RMySQL_0.9-3
## [18] RColorBrewer_1.0-5
## [19] gridExtra_0.9.1
## [20] gtable_0.1.2
## [21] marray_1.40.0
## [22] gplots_2.13.0
## [23] GSA_1.03
## [24] limma_3.18.13
## [25] xtable_1.7-3
## [26] cummeRbund_2.7.2
## [27] Gviz_1.6.0
## [28] rtracklayer_1.22.7
## [29] GenomicRanges_1.14.4
## [30] XVector_0.2.0
## [31] IRanges_1.20.7
## [32] fastcluster_1.1.13
## [33] reshape2_1.4
## [34] ggplot2_1.0.0
## [35] RSQLite_0.11.4
## [36] DBI_0.2-7
## [37] BiocGenerics_0.8.0
## [38] knitr_1.6
##
## loaded via a namespace (and not attached):
## [1] biomaRt_2.18.0      biovizBase_1.10.8  bitops_1.0-6
## [4] caTools_1.17        cluster_1.15.2     colorspace_1.2-4
## [7] dichromat_2.0-0     digest_0.6.4       DO.db_2.7
## [10] evaluate_0.5.5      formatR_0.10       Formula_1.1-1
## [13] GenomicFeatures_1.14.5 GOSemSim_1.20.3    graph_1.40.1
## [16] graphite_1.8.1      gtools_3.4.1       Hmisc_3.14-4
## [19] igraph_0.7.1        KEGG.db_2.10.1     KernSmooth_2.23-12
## [22] labeling_0.2        lattice_0.20-29    latticeExtra_0.6-26
## [25] MASS_7.3-33         Matrix_1.1-3       munsell_0.4.2
## [28] org.Hs.eg.db_2.10.1 proto_0.3-10       qvalue_1.36.0
## [31] Rcpp_0.11.2         RCurl_1.95-4.1     reactome.db_1.46.1
## [34] Rsamtools_1.14.3    scales_0.2.4       splines_3.0.2
## [37] stats4_3.0.2        survival_2.37-7    tcltk_3.0.2
## [40] tools_3.0.2         XML_3.98-1.1       zlibbioc_1.8.0

```

## Run Info

```
##          param
## 1      cmd_line
## 2          version
## 3  SVN_revision
## 4  boost_version
## 5          genome
##
## 1 cuffdiff -p 10 -L WT,linc-Enc1 -o /n/rinn_data1/seq/lgoff/Projects/BrainMap/data/diffs/linc-Enc1_vs_WT_Adult /n/rinn_data1/seq/lgoff/Projects/BrainMap
## 2
## 3
## 4
## 5
```

# linc-Enc1 KO vs WT (Embryonic)

This file shows the wt-v-ko comparison for linc-Enc1.

Cuff overview:

```
## CuffSet instance with:  
## 2 samples  
## 26754 genes  
## 77524 isoforms  
## 0 TSS  
## 23066 CDS  
## 0 promoters  
## 0 splicing  
## 19954 relCDS
```

## QC

### Dispersion

Dispersion plot for genes in cuff: (Overdispersion can lead to innacurate quants)

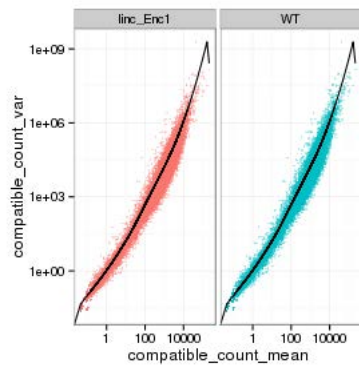

### Cross-replicate variability (fpkmSCVplot)

Differences in CV 2 can result in lower numbers of differentially expressed genes due to a higher degree of variability between replicate fpkm estimates.

Genes:



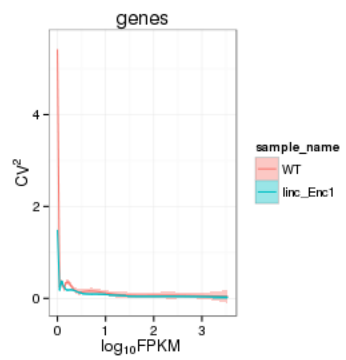

Isoforms:

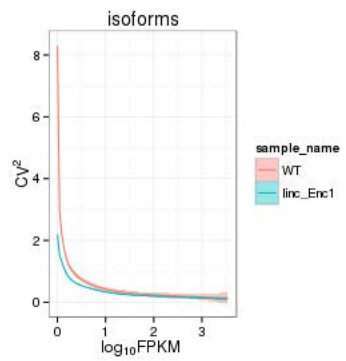

## MvA plot

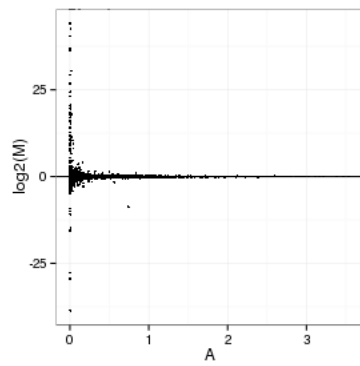

## MvA plot counts

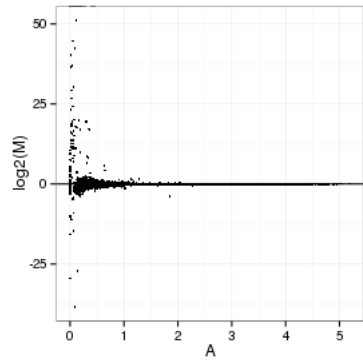

## Scatterplot matrix

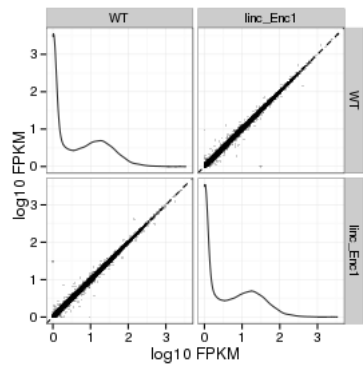

## Distributions

### Boxplots

Boxplot (genes)

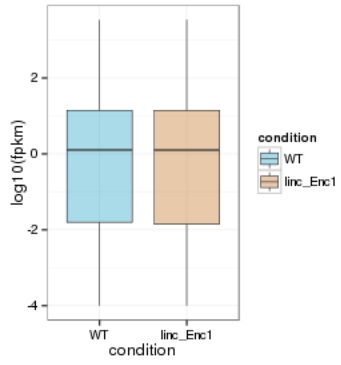

Boxplot (genes, replicates)

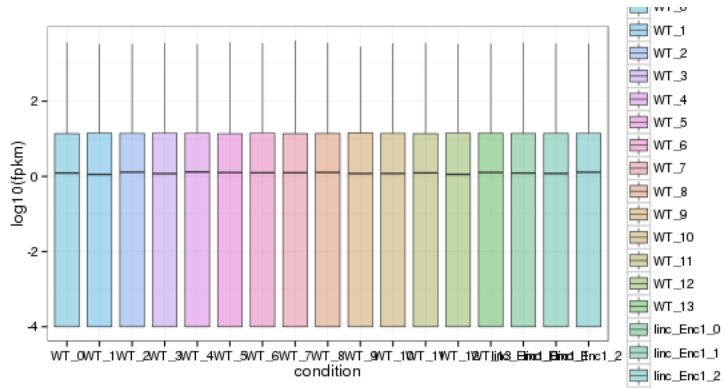

Boxplot (isoforms)

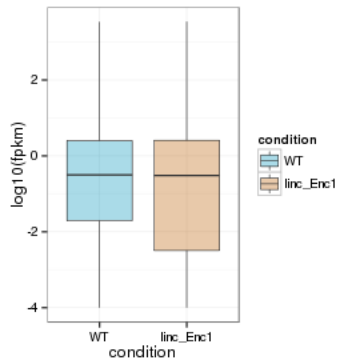

Boxplot (isoforms, replicates)

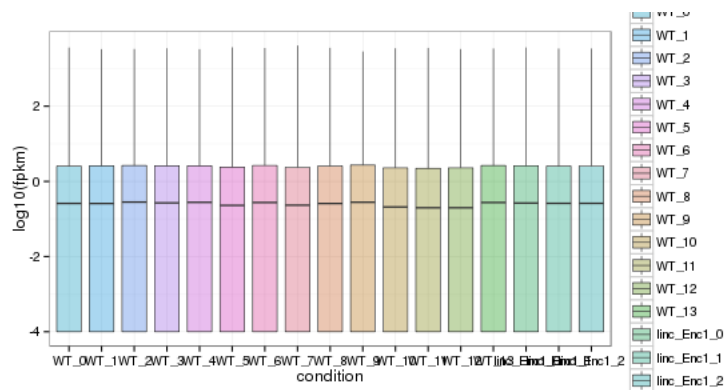

## Density

Density (genes)

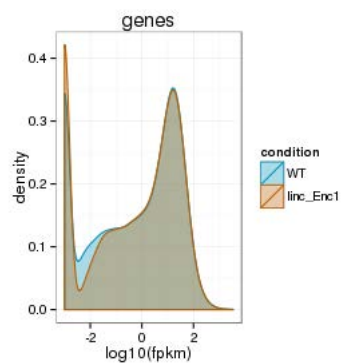

Density (genes, replicates)

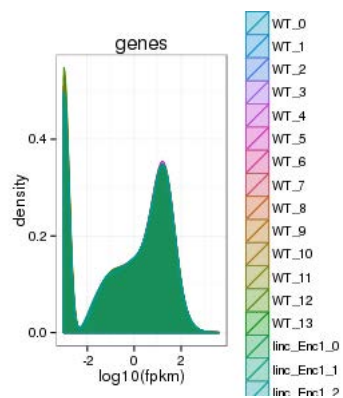

# Clustering

## Replicate Clusters

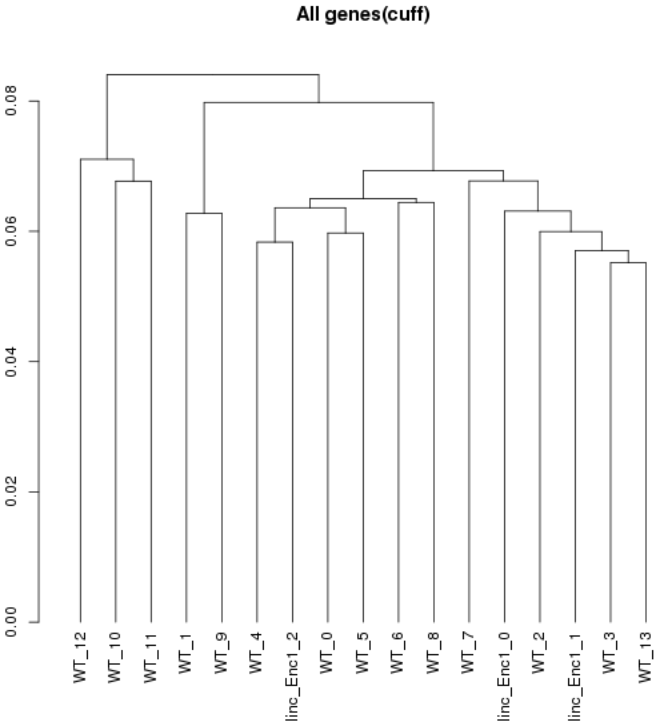

## NULL

## PCA (genes)

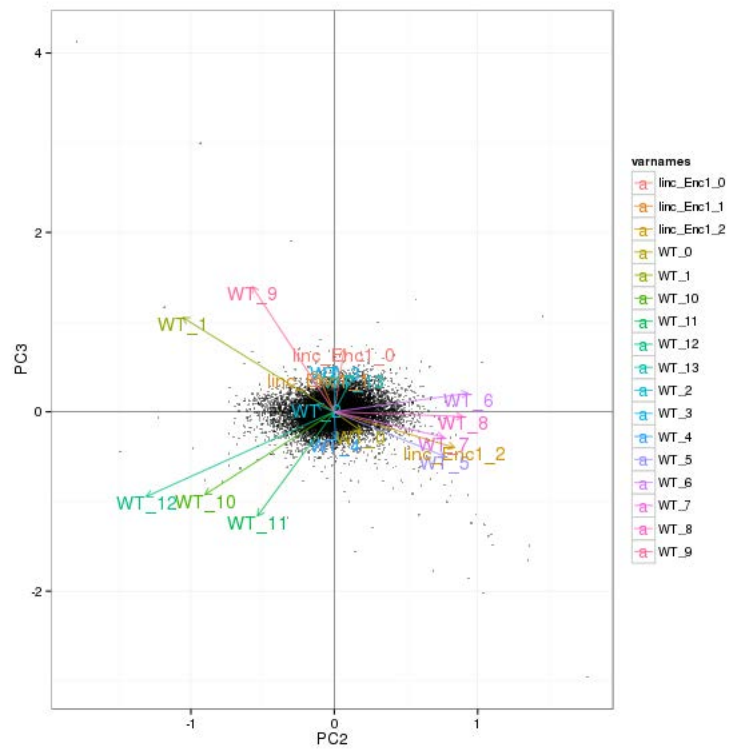

**MDS (genes)**



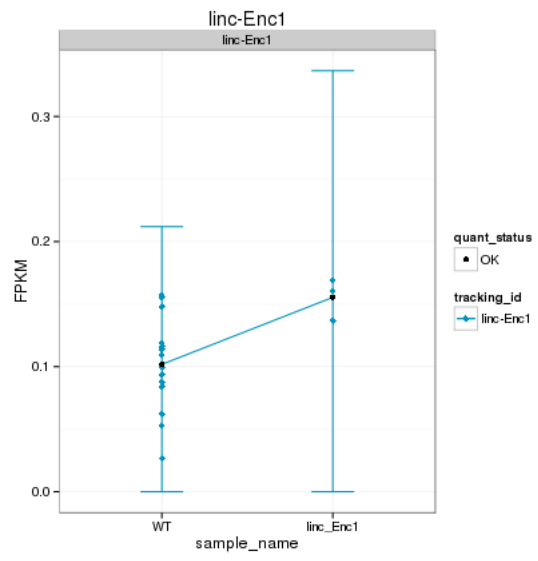

Endogenous expression of linc-Enc1 isoforms:



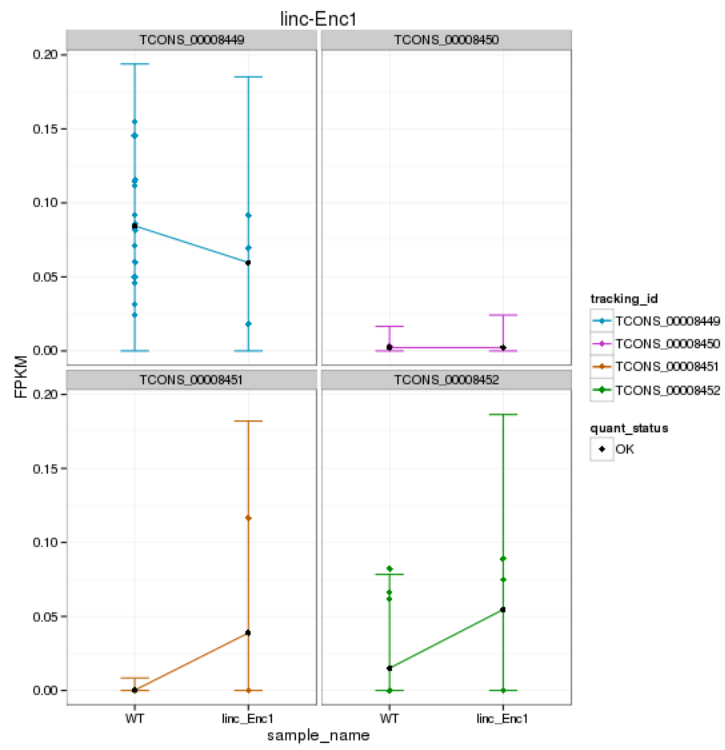

Barplot of gene expression:

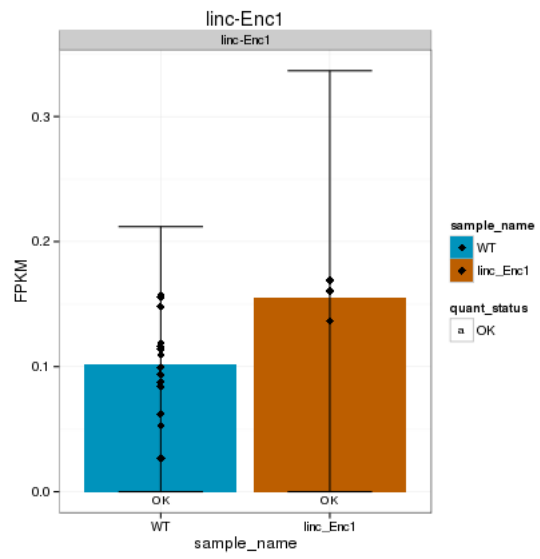

Barplot of isoform expression:

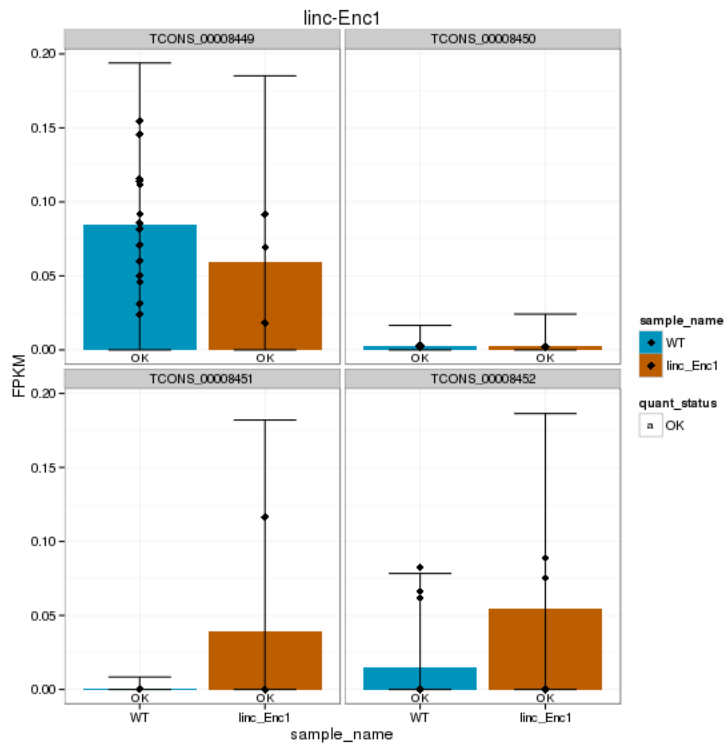

## LacZ expression

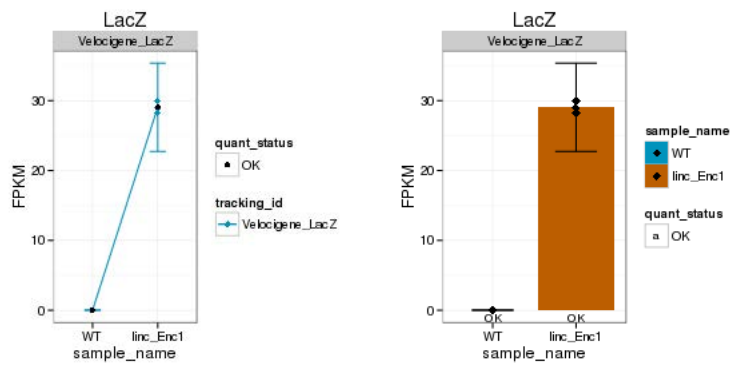

## Digital Genotyping (LacZ vs Endogenous lincRNA and Sex)

Eif2s3y is a y-expressed gene, Xist is an x-expressed gene Expression plot (endogenous linc, lacZ, Y-expressed gene):

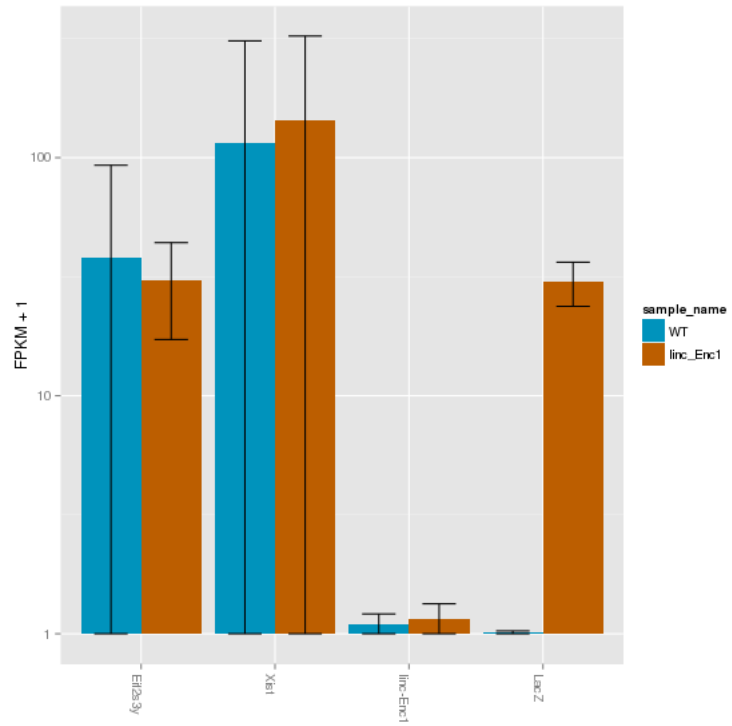

Expression heatmap:

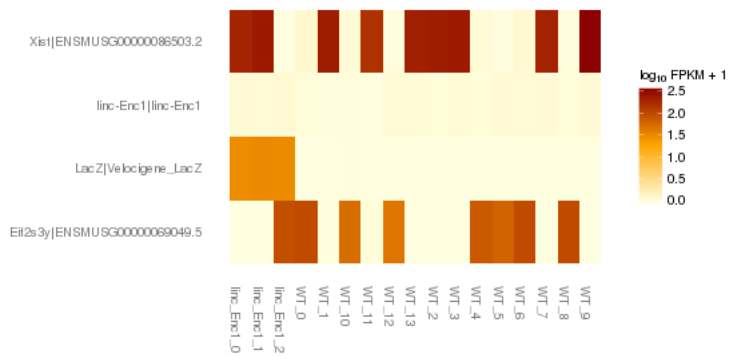

Track visualization



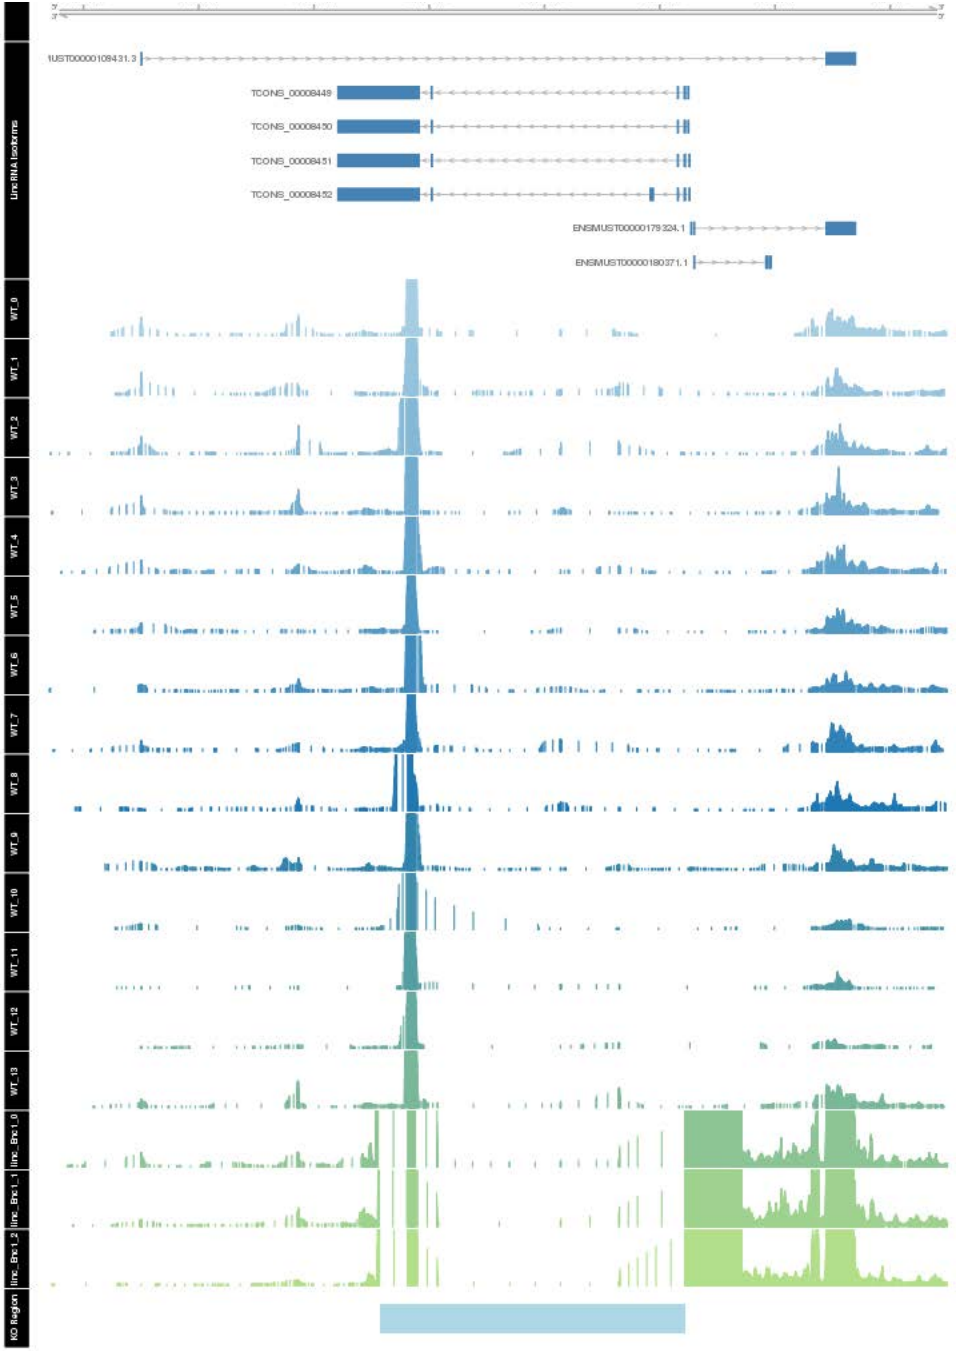

# Differential Analysis

## Differential Genes

There are 16 significantly differentially expressed genes. They are:

```
geneAnnot$gene_short_name
1 Rec8
2 Nnt
3 Fn1
4 Bspry
5 Hddc3
6 Foxj1
7 Enc1
8 Gm9493
9 Fat4
10 Hbb-y
11 Hbb-bh1
12 Hba-x
13 Alox5ap
14 Gstm6
15 Fat1
16 Gm2373
```

### Matrix of gene significant differences between conditions

(skip for Brainmap wt-v-ko comparisons)

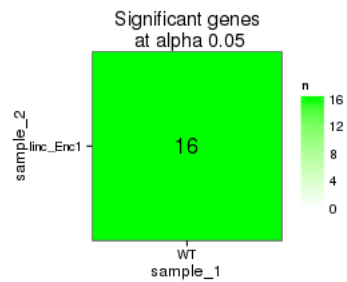

### Significant gene expression differences between conditions

Expression plot (genes):(turned off)

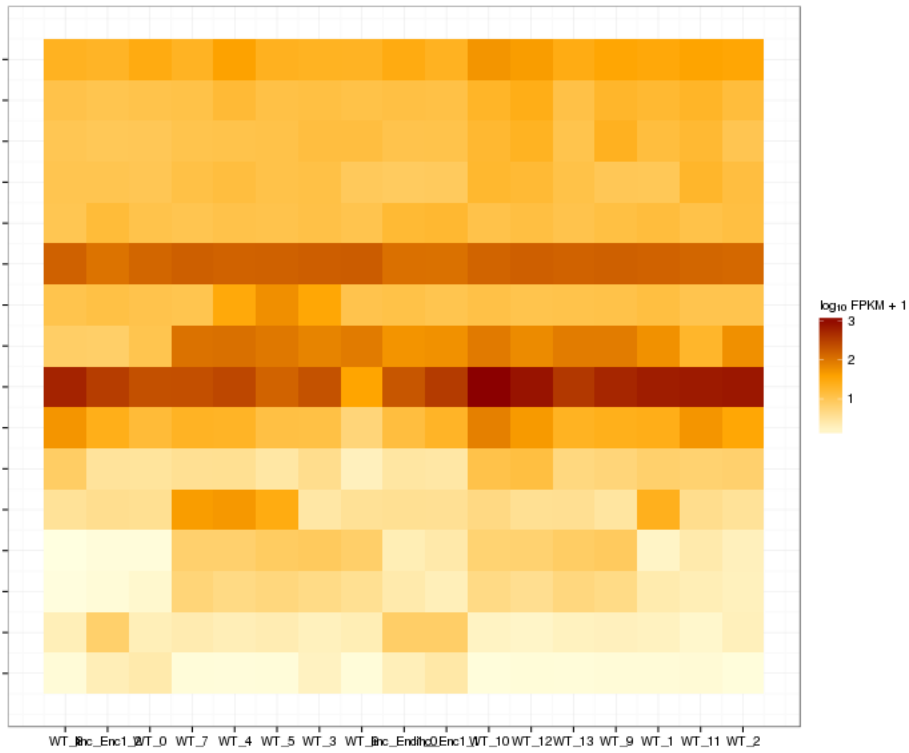

Significant genes with expression >50fpm (any condition):(turned off)

An individual look at each of the highly expressed significantly differentially regulated genes: (eval=false for first pass)

### Expression-level/significance relationship

Scatter plot of significant genes only:

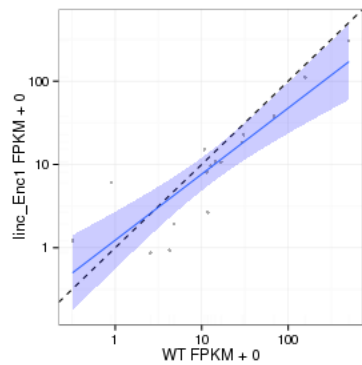

### Volcano Plot

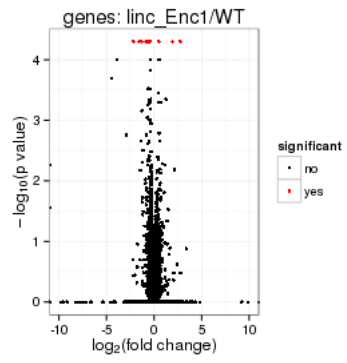

### Volcano plot with significant genes only:

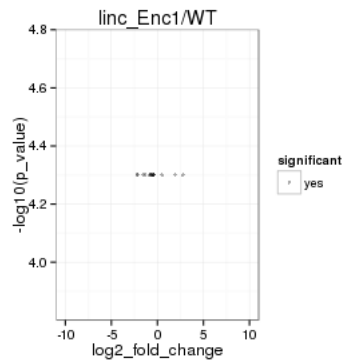

### FoldChange Heatmap



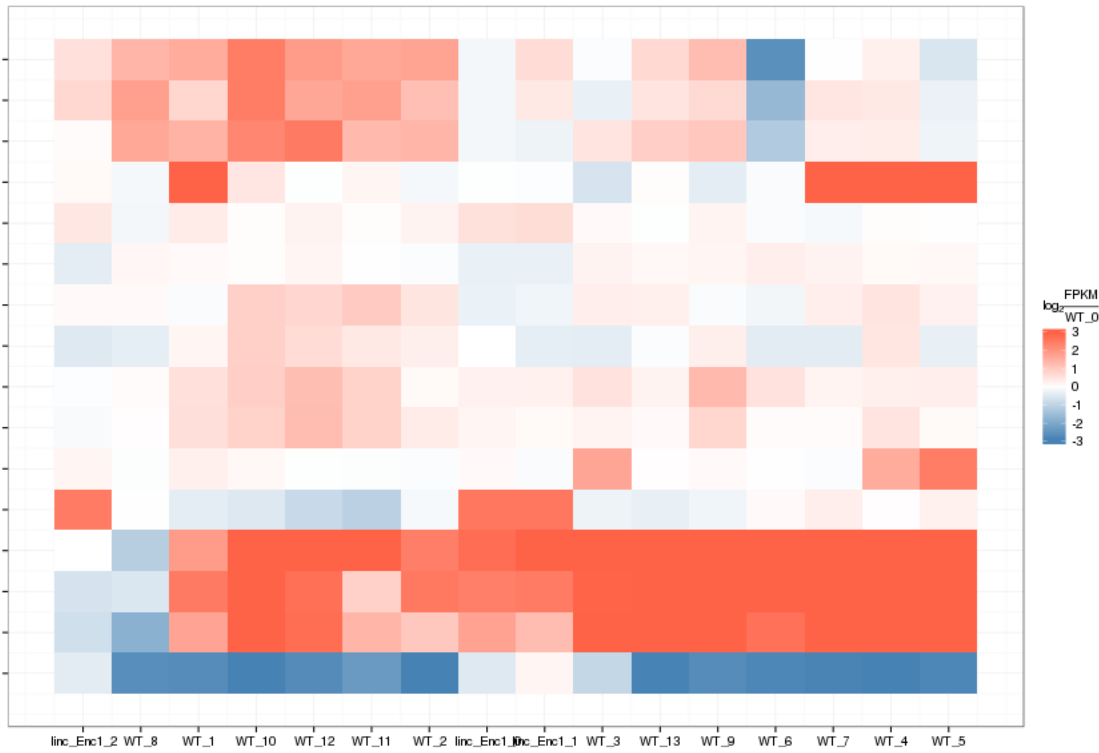

## Differential Splicing

### Differential Isoforms between conditions

Per isoform difference between conditions:

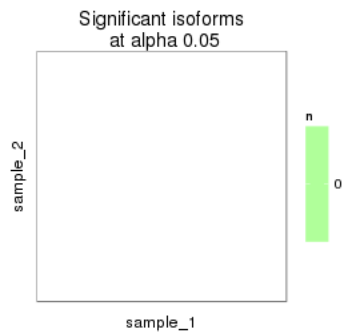

These isoforms are:

[1] "no sig isoforms"

Gene-level DE isoform heatmap

```
## [1] "no sig isoforms"
```

Isoform foldchange heatmap by isoform:

```
## [1] "no sig isoforms"
```

## Differential Splicing between conditions

(eval false for first pass)

Per condition differences in isoforms (Does gene have diff piechart between conditions?)

These genes are:

Splicing heatmap by isoform:

Splicing heatmap by gene

The following are significantly differentially spliced genes (relative portion of isoform per condition):

# Gene/Pathway Analysis

## GSEA

Enrichment and zscores are calculated based on expression in KO vs WT ( $\text{fpkmKO}/\text{fpkmWT}$ ), so genes that are down regulated in KO are shown in blue, while upregulation is shown in red.

KO/WT Blue = down in KO Red = Up in KO

Biocarta enrichment:

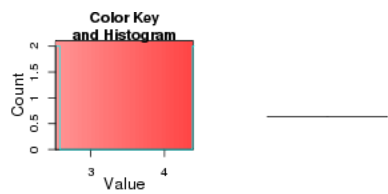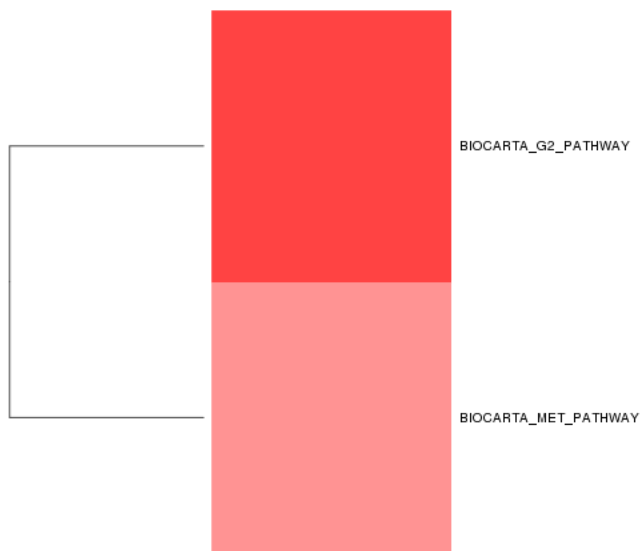

Biocarta zscore:

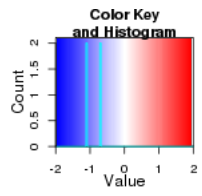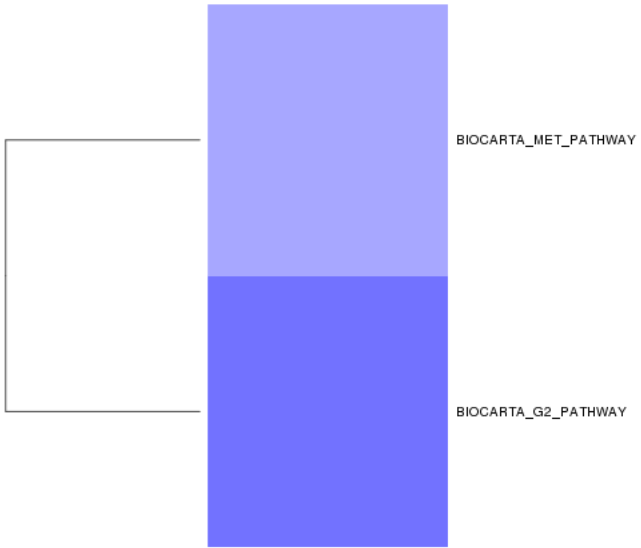

Reactome enrichment:

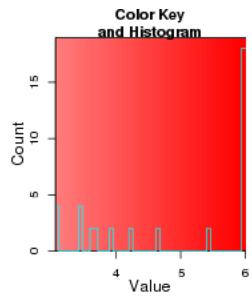

\_\_\_\_\_

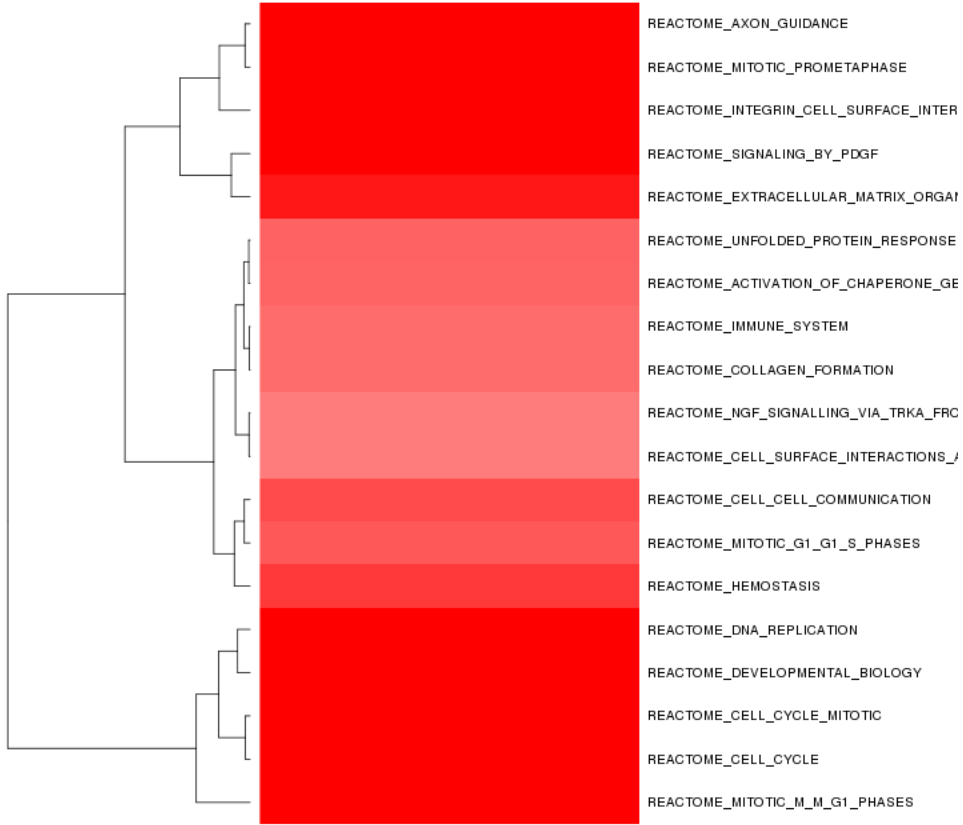

Reactome zscore:

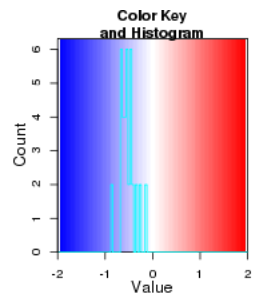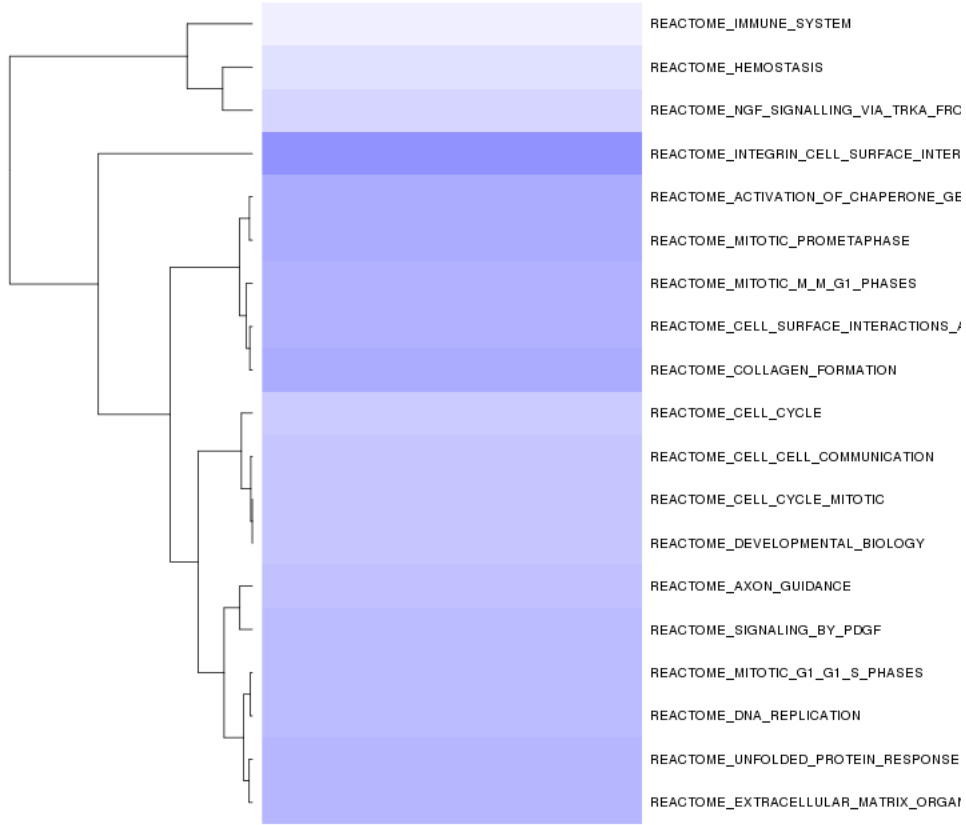

Kegg enrichment:

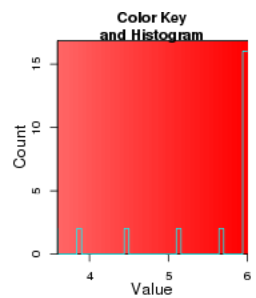

\_\_\_\_\_

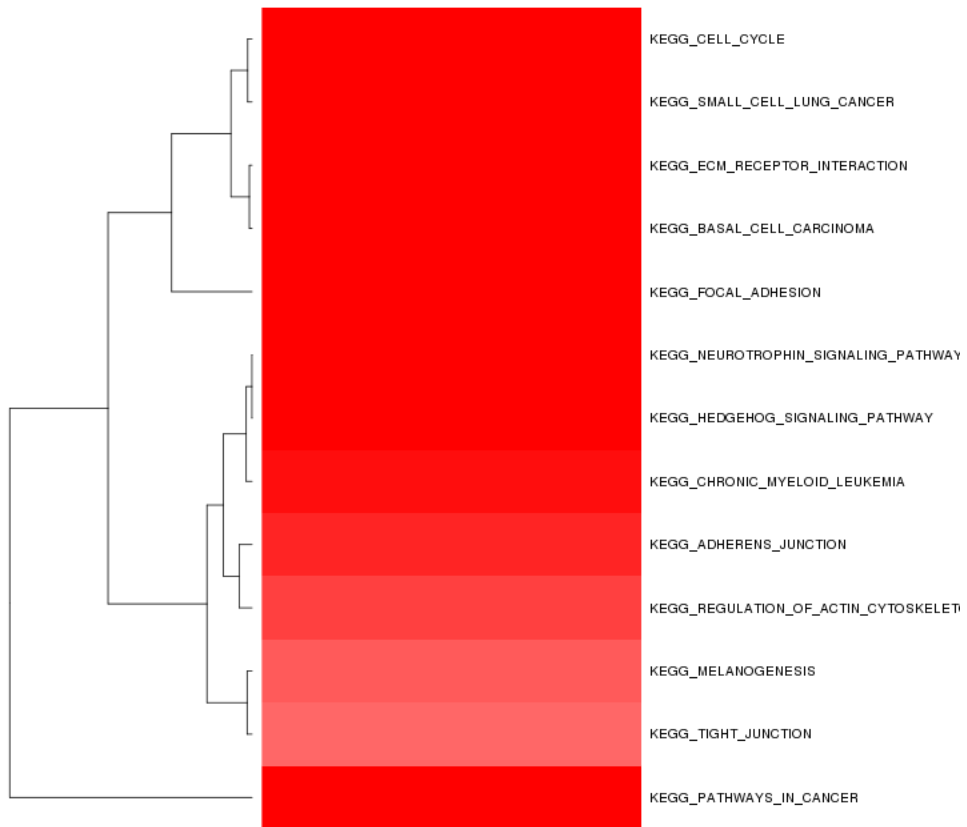

Kegg zscore:

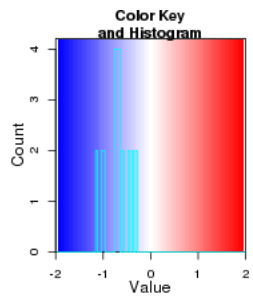

\_\_\_\_\_

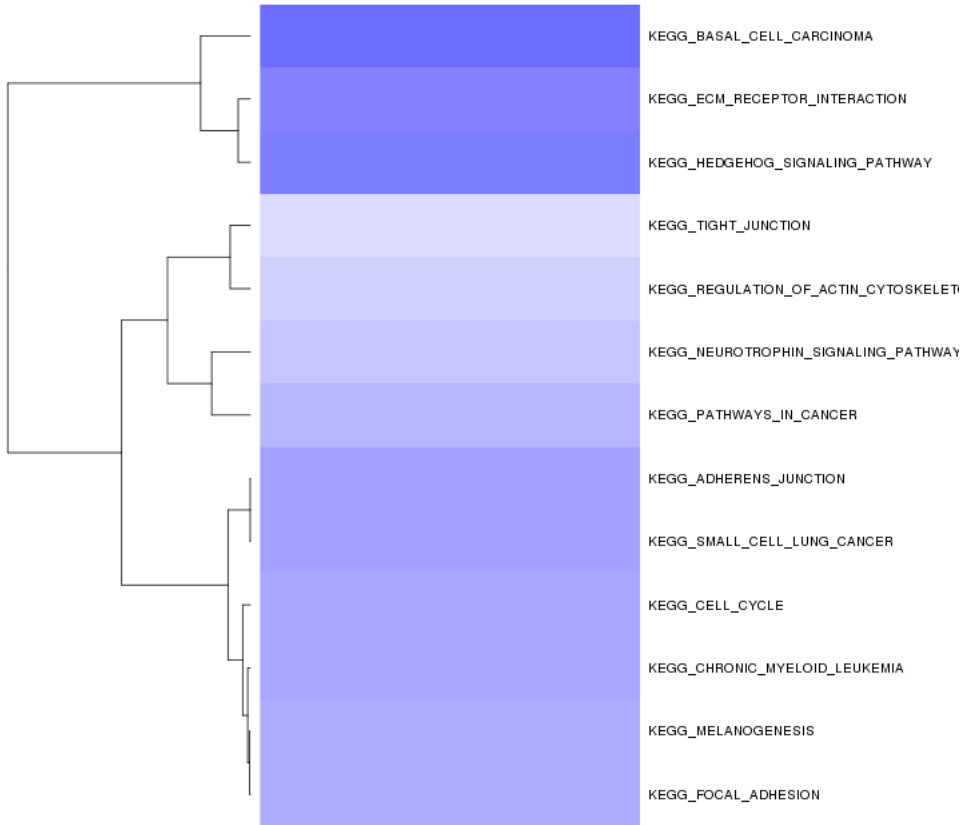

Interneuron enrichment:

## Error: argument is of length zero

Interneuron zscore:

## Error: incorrect number of dimensions



```
## Error: object 'x_ordered' not found
```

```
## Error: error in evaluating the argument 'x' in selecting a method for function 'as.matrix': Error: object 'x_ordered' not found
```

```
## Error: object 'x_ordered' not found
```

Oncogene enrichment:

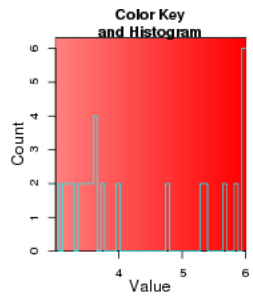

\_\_\_\_\_

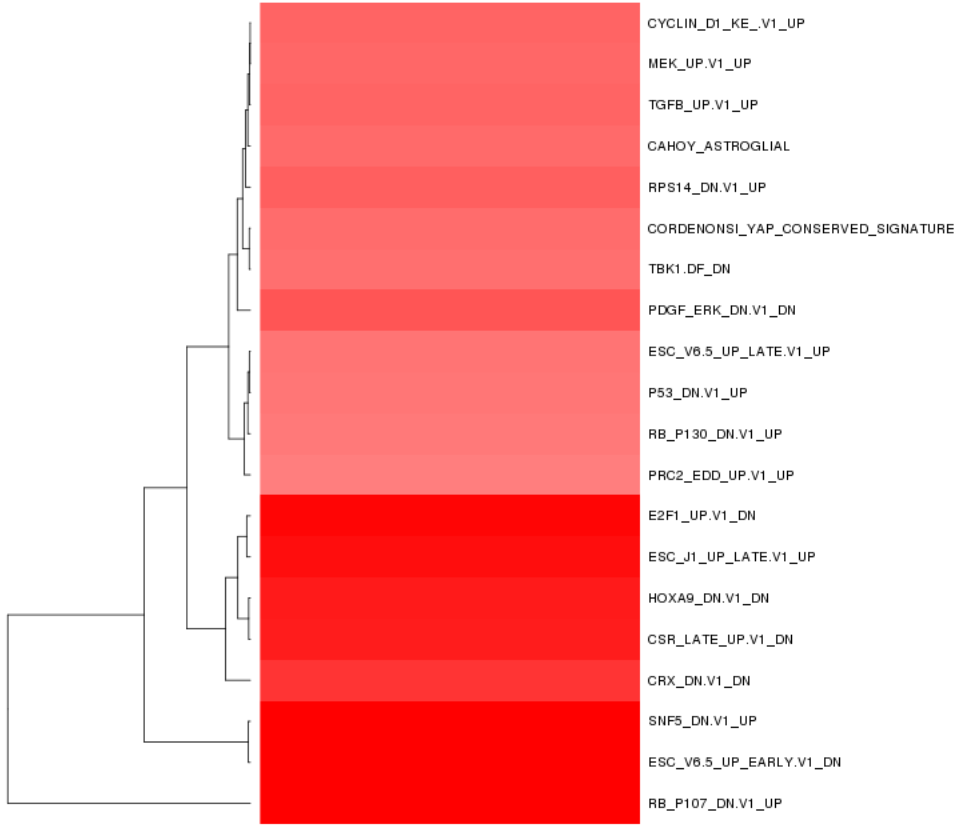

Oncogene zscore:

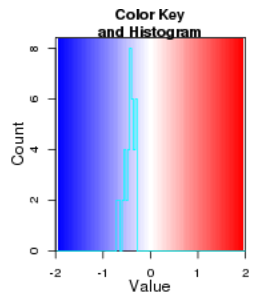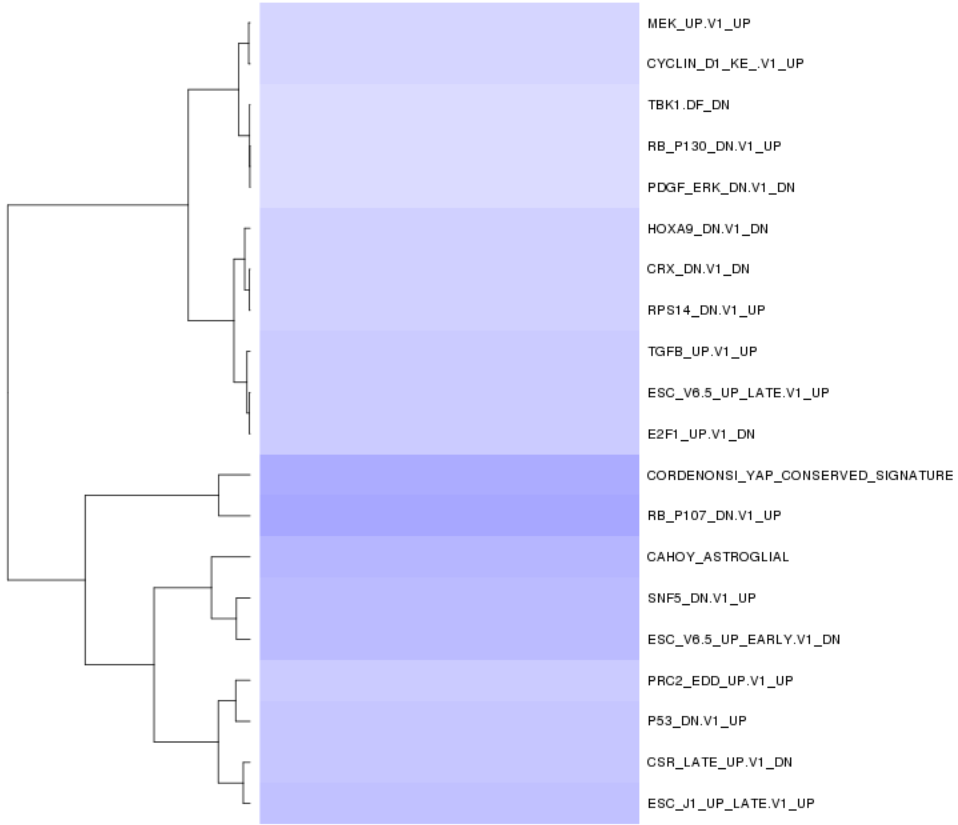

Immuno enrichment:

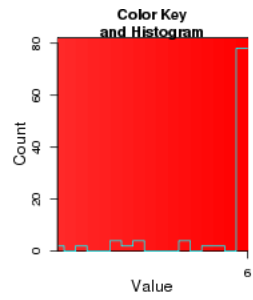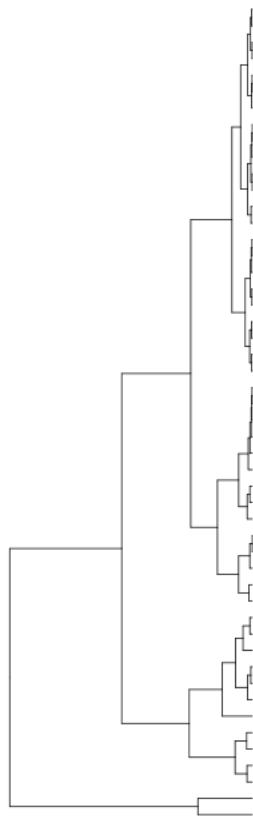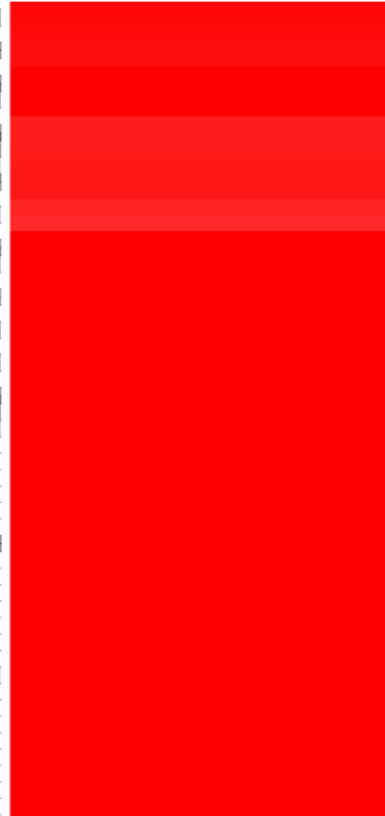

GSE339\_EX\_VIVO\_VS\_IN\_CULTURE\_CD8POS\_  
 GSE15930\_NAIVE\_VS\_72H\_IN\_VITRO\_STIM\_TF  
 GSE10325\_LUPUS\_BCELL\_VS\_LUPUS\_MYELO  
 GSE2826\_WT\_VS\_BTK\_KO\_BCELL\_DN  
 GSE24634\_TEFF\_VS\_TCONV\_DAY10\_IN\_CULTI  
 GSE29614\_CTRL\_VS\_TIV\_FLU\_VACCINE\_PBMK  
 GSE13485\_DAY7\_VS\_DAY21\_YF17D\_VACCINE  
 GSE9988\_ANTI\_TREM1\_VS\_CTRL\_TREATED\_M  
 GSE14350\_TREG\_VS\_TEFF\_IN\_IL2RB\_KO\_DN  
 GSE15215\_CD2\_POS\_VS\_NEG\_PDC\_UP  
 GSE11057\_NAIVE\_VS\_CENT\_MEMORY\_CD4\_TI  
 GSE1432\_1H\_VS\_24H\_IFNG\_MICROGLIA\_UP  
 GSE339\_CD4POS\_VS\_CD4CD8DN\_DC\_DN  
 GSE2706\_R848\_VS\_LPS\_8H\_STIM\_DC\_DN  
 GSE9988\_ANTI\_TREM1\_AND\_LPS\_VS\_CTRL\_T  
 GSE29618\_MONOCYTE\_VS\_MDC\_UP  
 GSE9988\_LOW\_LPS\_VS\_CTRL\_TREATED\_MON  
 GSE22886\_NAIVE\_CD8\_TCELL\_VS\_MONOCYTE  
 GSE20715\_0H\_VS\_24H\_OZONE\_TLR4\_KO\_LUM  
 GSE29618\_MONOCYTE\_VS\_MDC\_DAY7\_FLU\_V  
 GSE12366\_GC\_VS\_MEMORY\_BCELL\_UP  
 GSE22886\_NAIVE\_CD8\_TCELL\_VS\_NKCELL\_D  
 GSE29614\_DAY3\_VS\_DAY7\_TIV\_FLU\_VACCINE  
 GSE17721\_0.5H\_VS\_4H\_CPG\_BMDM\_UP  
 GSE22886\_NAIVE\_TCELL\_VS\_NKCELL\_DN  
 GSE22886\_NAIVE\_BCELL\_VS\_MONOCYTE\_DN  
 GSE9650\_EFFECTOR\_VS\_MEMORY\_CD8\_TCEL  
 GSE9650\_NAIVE\_VS\_EFF\_CD8\_TCELL\_DN  
 GSE3982\_DC\_VS\_MAC\_DN  
 GSE8289\_HEALTHY\_VS\_STREP\_AUREUS\_INF  
 GSE14000\_4H\_VS\_16H\_LPS\_DC\_TRANSLATEC  
 GSE36476\_CTRL\_VS\_TSST\_ACT\_40H\_MEMOR  
 KAECH\_NAIVE\_VS\_DAY8\_EFF\_CD8\_TCELL\_DN  
 GSE20715\_0H\_VS\_48H\_OZONE\_LUNG\_DN  
 KAECH\_DAY8\_EFF\_VS\_MEMORY\_CD8\_TCELL\_  
 GSE24634\_TREG\_VS\_TCONV\_POST\_DAY10\_IL  
 GSE29618\_MONOCYTE\_VS\_PDC\_UP  
 GOLDRATH\_NAIVE\_VS\_EFF\_CD8\_TCELL\_DN  
 GSE9988\_ANTI\_TREM1\_AND\_LPS\_VS\_VEHICLI  
 GSE9988\_LOW\_LPS\_VS\_VEHICLE\_TREATED\_I  
 KAECH\_DAY8\_EFF\_VS\_DAY15\_EFF\_CD8\_TCEL  
 GSE9988\_ANTI\_TREM1\_VS\_VEHICLE\_TREATEI  
 GSE36476\_CTRL\_VS\_TSST\_ACT\_72H\_MEMOR  
 GSE9988\_LPS\_VS\_VEHICLE\_TREATED\_MONO  
 GSE29614\_CTRL\_VS\_DAY7\_TIV\_FLU\_VACCINE  
 GSE8289\_HEALTHY\_VS\_STREP\_PNEUMO\_INF  
 GOLDRATH\_EFF\_VS\_MEMORY\_CD8\_TCELL\_UF  
 GSE15750\_DAY6\_VS\_DAY10\_EFF\_CD8\_TCELL  
 GSE15750\_DAY6\_VS\_DAY10\_TRAFKO\_EFF\_C  
 GSE30962\_PRIMARY\_VS\_SECONDARY\_ACUTE

Immuno zscore:

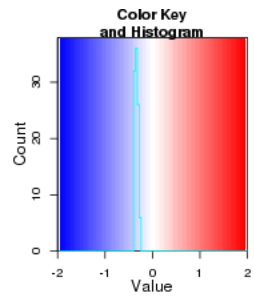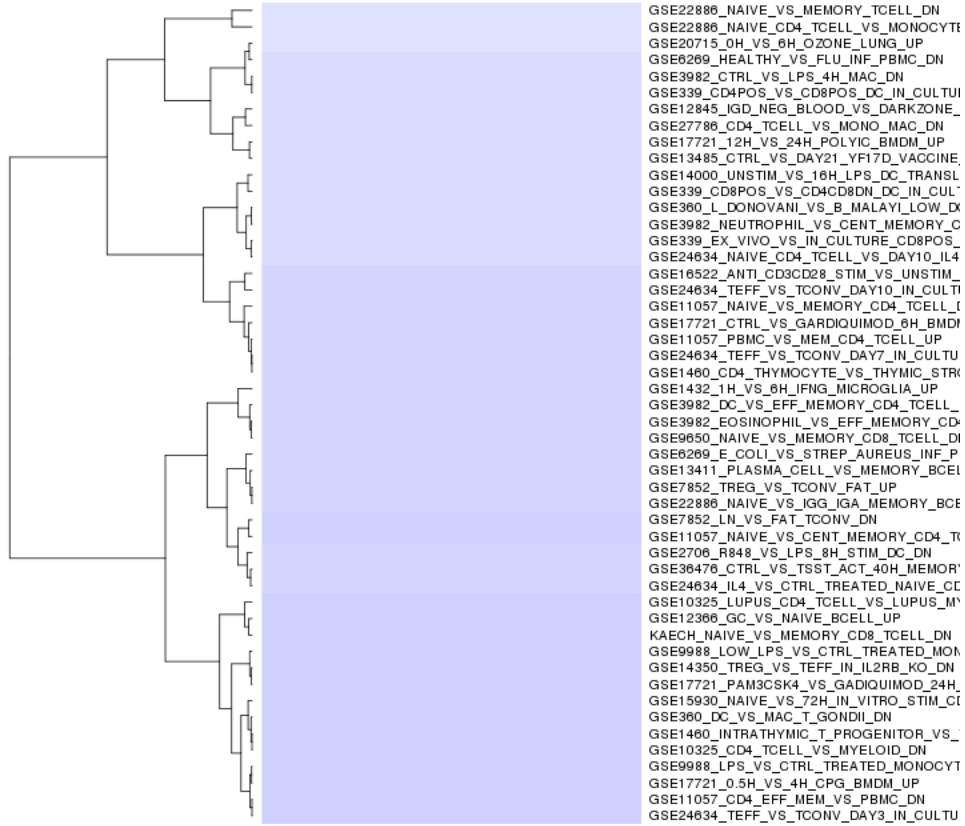

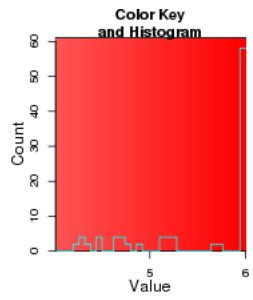

\_\_\_\_\_

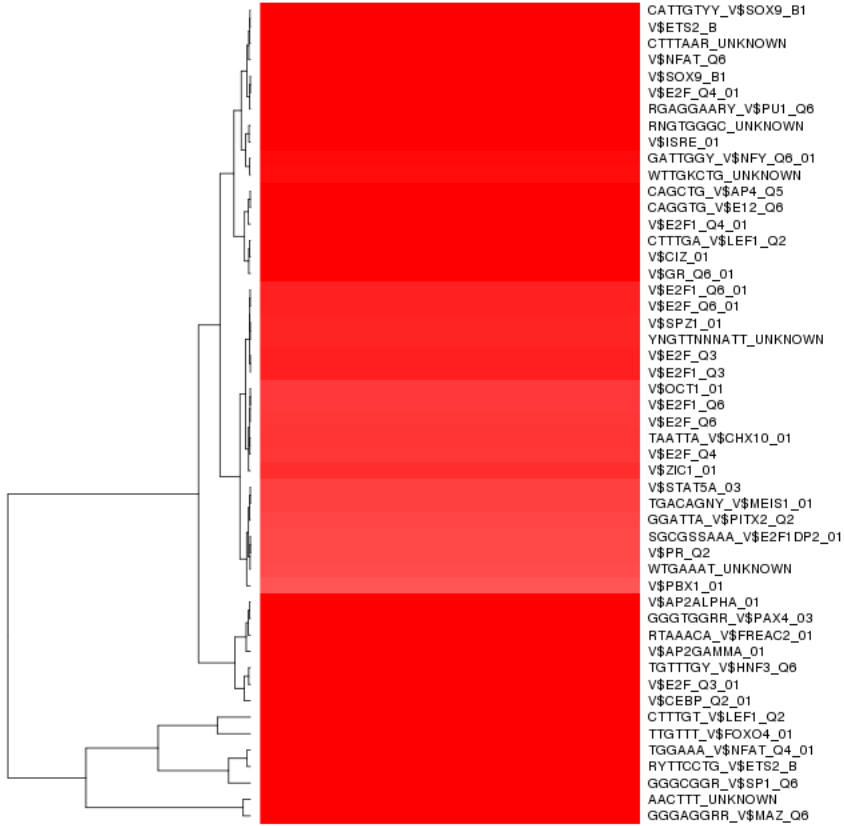

TF zscore:

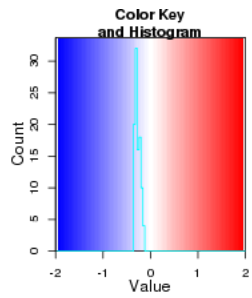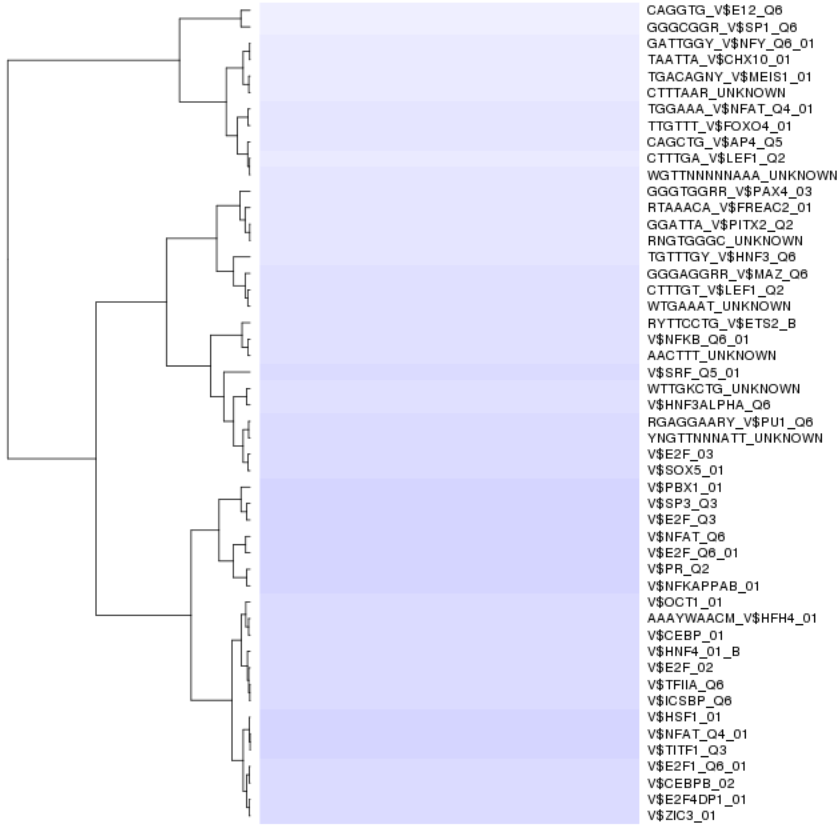

## GO enrichment

Cluster profiler used to call enrichments of significantly differentially regulated genes that map to Entrez IDs.

```
## Error: 'x' and 'units' must have length > 0
```

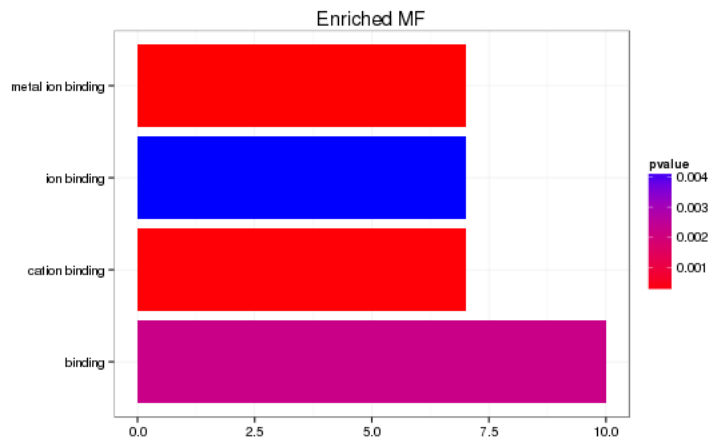

```
## Error: 'x' and 'units' must have length > 0
```

```
## Error: need finite 'xlim' values
```

```
## Error: need finite 'xlim' values
```

**Enrichment or depletion for stage-specific cell cycle markers**



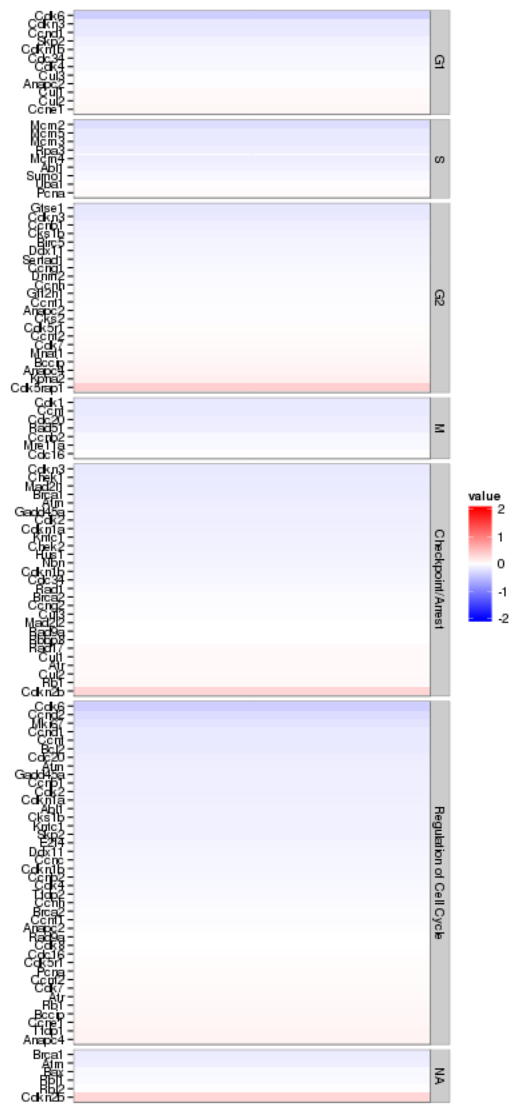

Enrichment or depletion for markers of specific cortical layers

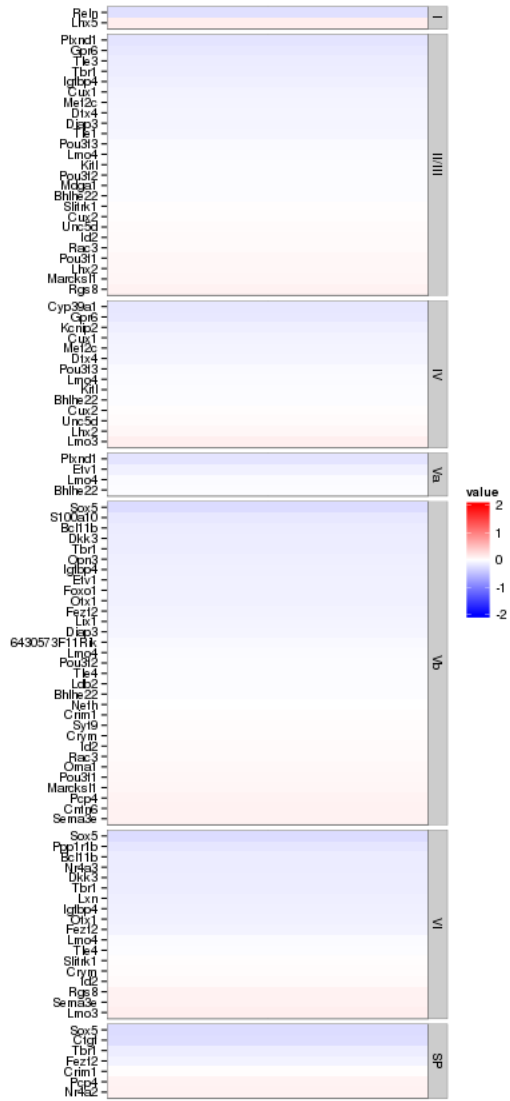

Enrichment or depletion for specific neural cell types

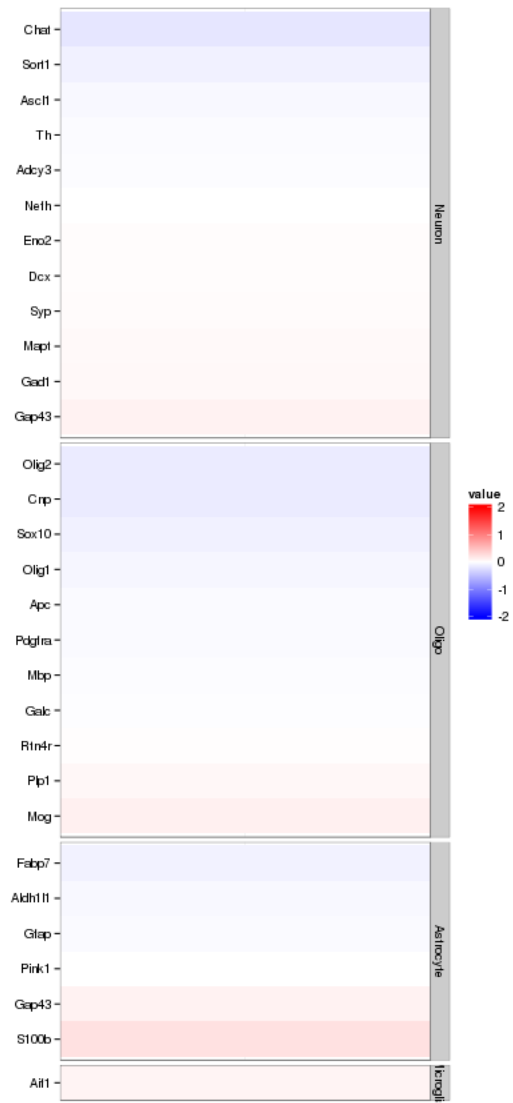

**Enrichment or Depletion of neural differentiation markers**

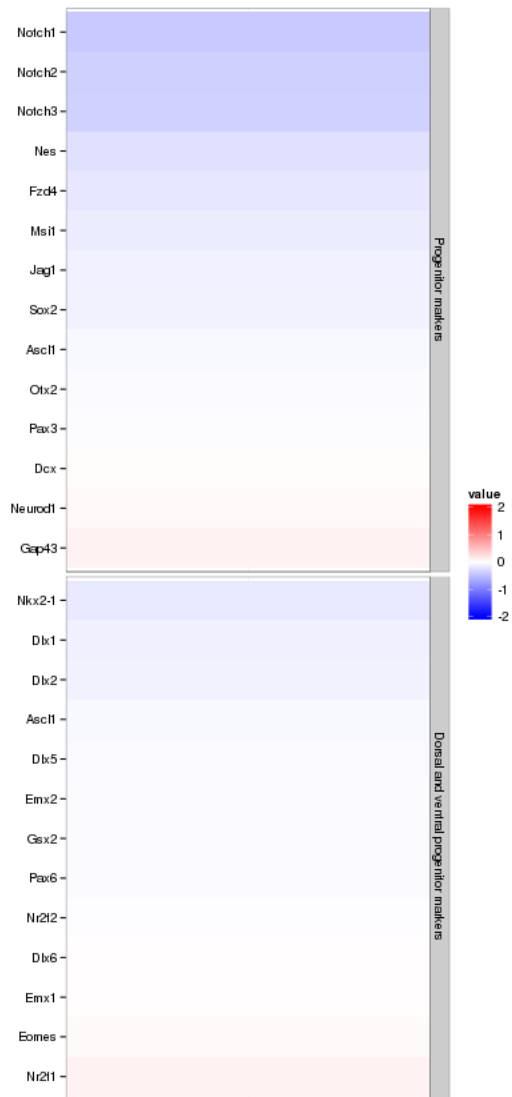

## Cis vs Trans (locally)

$\log_2$  Foldchange and test statistic are calculated with the ratio of  $\text{fpm(KO)}/\text{fpm(WT)}$ , thus the test\_stat is positive if a gene is higher in the KO and negative if a gene has lower expression in the KO

The pvalue for 1 genes significantly regulated in a region this size is: 0.0409

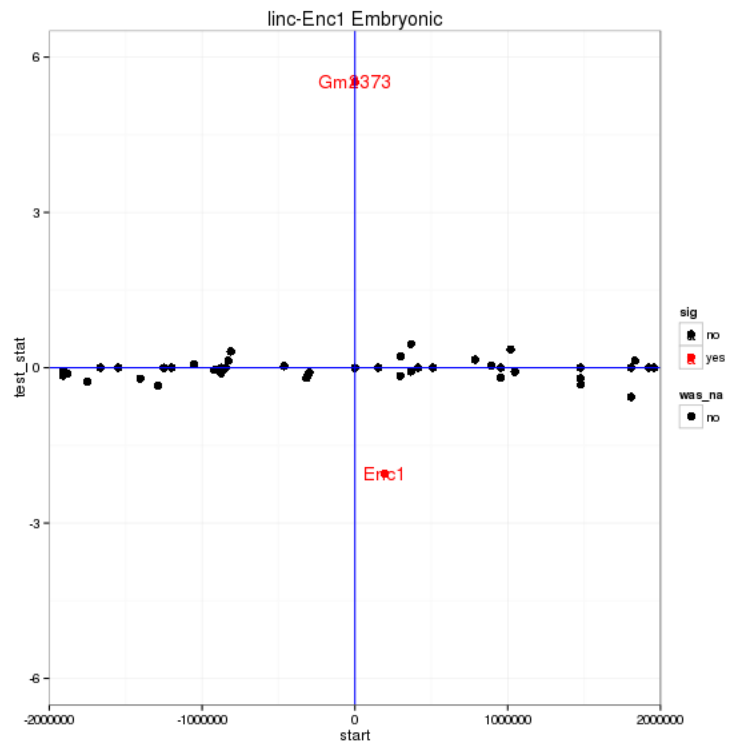

## Notes

Samples used are:

10

- 1 JR753
- 2 JR750
- 3 JR771
- 4 JR755
- 5 JR811
- 6 JR768
- 7 JR761
- 8 JR815
- 9 JR789
- 10 JR748
- 11 JR716
- 12 JR717
- 13 JR719
- 14 JR756

15 JR752  
16 JR770  
17 JR839

## Replicates

| file                                                                           | sample_name | replicate | rep_name    | total_mass  | norm_mass   | internal_scale | external_scale |
|--------------------------------------------------------------------------------|-------------|-----------|-------------|-------------|-------------|----------------|----------------|
| 1 /n/rinn_data1/seq/lgooff/Projects/BrainMap/data/quants/JR753/abundances.cxb  | WT          | 0         | WT_0        | 39331900.00 | 33003900.00 | 1.23           | 1.00           |
| 2 /n/rinn_data1/seq/lgooff/Projects/BrainMap/data/quants/JR750/abundances.cxb  | WT          | 1         | WT_1        | 36031100.00 | 33003900.00 | 1.07           | 1.00           |
| 3 /n/rinn_data1/seq/lgooff/Projects/BrainMap/data/quants/JR771/abundances.cxb  | WT          | 2         | WT_2        | 38857100.00 | 33003900.00 | 1.20           | 1.00           |
| 4 /n/rinn_data1/seq/lgooff/Projects/BrainMap/data/quants/JR755/abundances.cxb  | WT          | 3         | WT_3        | 41811300.00 | 33003900.00 | 1.26           | 1.00           |
| 5 /n/rinn_data1/seq/lgooff/Projects/BrainMap/data/quants/JR811/abundances.cxb  | WT          | 4         | WT_4        | 38172800.00 | 33003900.00 | 1.17           | 1.00           |
| 6 /n/rinn_data1/seq/lgooff/Projects/BrainMap/data/quants/JR768/abundances.cxb  | WT          | 5         | WT_5        | 28375200.00 | 33003900.00 | 0.87           | 1.00           |
| 7 /n/rinn_data1/seq/lgooff/Projects/BrainMap/data/quants/JR761/abundances.cxb  | WT          | 6         | WT_6        | 31706200.00 | 33003900.00 | 0.95           | 1.00           |
| 8 /n/rinn_data1/seq/lgooff/Projects/BrainMap/data/quants/JR815/abundances.cxb  | WT          | 7         | WT_7        | 29733100.00 | 33003900.00 | 0.90           | 1.00           |
| 9 /n/rinn_data1/seq/lgooff/Projects/BrainMap/data/quants/JR789/abundances.cxb  | WT          | 8         | WT_8        | 27681500.00 | 33003900.00 | 0.84           | 1.00           |
| 10 /n/rinn_data1/seq/lgooff/Projects/BrainMap/data/quants/JR748/abundances.cxb | WT          | 9         | WT_9        | 32367000.00 | 33003900.00 | 0.94           | 1.00           |
| 11 /n/rinn_data1/seq/lgooff/Projects/BrainMap/data/quants/JR716/abundances.cxb | WT          | 10        | WT_10       | 26144700.00 | 33003900.00 | 0.79           | 1.00           |
| 12 /n/rinn_data1/seq/lgooff/Projects/BrainMap/data/quants/JR717/abundances.cxb | WT          | 11        | WT_11       | 25565400.00 | 33003900.00 | 0.78           | 1.00           |
| 13 /n/rinn_data1/seq/lgooff/Projects/BrainMap/data/quants/JR719/abundances.cxb | WT          | 12        | WT_12       | 22697800.00 | 33003900.00 | 0.67           | 1.00           |
| 14 /n/rinn_data1/seq/lgooff/Projects/BrainMap/data/quants/JR756/abundances.cxb | WT          | 13        | WT_13       | 38948900.00 | 33003900.00 | 1.18           | 1.00           |
| 15 /n/rinn_data1/seq/lgooff/Projects/BrainMap/data/quants/JR752/abundances.cxb | linc_Enc1   | 0         | linc_Enc1_0 | 37182200.00 | 33003900.00 | 1.13           | 1.00           |
| 16 /n/rinn_data1/seq/lgooff/Projects/BrainMap/data/quants/JR770/abundances.cxb | linc_Enc1   | 1         | linc_Enc1_1 | 42845600.00 | 33003900.00 | 1.30           | 1.00           |
| 17 /n/rinn_data1/seq/lgooff/Projects/BrainMap/data/quants/JR839/abundances.cxb | linc_Enc1   | 2         | linc_Enc1_2 | 33810100.00 | 33003900.00 | 1.03           | 1.00           |

## Session Info

```
## R version 3.0.2 (2013-09-25)
## Platform: x86_64-unknown-linux-gnu (64-bit)
##
## locale:
## [1] LC_CTYPE=en_US.UTF-8      LC_NUMERIC=C
## [3] LC_TIME=en_US.UTF-8      LC_COLLATE=en_US.UTF-8
## [5] LC_MONETARY=en_US.UTF-8  LC_MESSAGES=en_US.UTF-8
## [7] LC_PAPER=en_US.UTF-8     LC_NAME=C
## [9] LC_ADDRESS=C             LC_TELEPHONE=C
## [11] LC_MEASUREMENT=en_US.UTF-8 LC_IDENTIFICATION=C
##
## attached base packages:
## [1] grid      parallel  methods  stats    graphics  grDevices  utils
## [8] datasets  base
##
## other attached packages:
## [1] plyr_1.8.1
## [2] stringr_0.6.2
## [3] seqbias_1.10.0
```

```

## [4] BSgenome.Mmusculus.UCSC.mm10_1.3.19
## [5] BSgenome_1.30.0
## [6] Biostrings_2.30.1
## [7] gdata_2.13.3
## [8] GO.db_2.10.1
## [9] org.Mm.eg.db_2.10.1
## [10] clusterProfiler_1.13.1
## [11] DOSE_2.0.0
## [12] ReactomePA_1.6.1
## [13] AnnotationDbi_1.24.0
## [14] Biobase_2.22.0
## [15] mgcv_1.7-29
## [16] nlme_3.1-117
## [17] RMySQL_0.9-3
## [18] RColorBrewer_1.0-5
## [19] gridExtra_0.9.1
## [20] gtable_0.1.2
## [21] marray_1.40.0
## [22] gplots_2.13.0
## [23] GSA_1.03
## [24] limma_3.18.13
## [25] xtable_1.7-3
## [26] cummeRbund_2.7.2
## [27] Gviz_1.6.0
## [28] rtracklayer_1.22.7
## [29] GenomicRanges_1.14.4
## [30] XVector_0.2.0
## [31] IRanges_1.20.7
## [32] fastcluster_1.1.13
## [33] reshape2_1.4
## [34] ggplot2_1.0.0
## [35] RSQLite_0.11.4
## [36] DBI_0.2-7
## [37] BiocGenerics_0.8.0
## [38] knitr_1.6
##
## loaded via a namespace (and not attached):
## [1] biomaRt_2.18.0      biovizBase_1.10.8   bitops_1.0-6
## [4] caTools_1.17        cluster_1.15.2      colorspace_1.2-4
## [7] dichromat_2.0-0     digest_0.6.4        DO.db_2.7
## [10] evaluate_0.5.5      formatR_0.10        Formula_1.1-1
## [13] GenomicFeatures_1.14.5 GOSemSim_1.20.3     graph_1.40.1
## [16] graphite_1.8.1      gtools_3.4.1        Hmisc_3.14-4
## [19] igraph_0.7.1        KEGG.db_2.10.1      KernSmooth_2.23-12
## [22] labeling_0.2        lattice_0.20-29     latticeExtra_0.6-26
## [25] MASS_7.3-33         Matrix_1.1-3        munsell_0.4.2
## [28] org.Hs.eg.db_2.10.1 proto_0.3-10        qvalue_1.36.0
## [31] Rcpp_0.11.2         RCurl_1.95-4.1      reactome.db_1.46.1
## [34] Rsamtools_1.14.3    scales_0.2.4        splines_3.0.2
## [37] stats4_3.0.2        survival_2.37-7     tcltk_3.0.2
## [40] tools_3.0.2         XML_3.98-1.1        zlibbioc_1.8.0

```

## Run Info

```
##          param
## 1      cmd_line
## 2          version
## 3  SVN_revision
## 4  boost_version
## 5          genome
##
## 1 cuffdiff -p 10 -L WT,linc-Enc1 -o /n/rinn_data1/seq/lgoff/Projects/BrainMap/data/diffs/linc-Enc1_vs_WT_Embryonic /n/rinn_data1/seq/lgoff/Projects/Brai
## 2
## 3
## 4
## 5
```



# Manr KO vs WT (Adult)

This file shows the wt-v-ko comparison for Manr.

Cuff overview:

```
## CuffSet instance with:  
## 2 samples  
## 26754 genes  
## 77524 isoforms  
## 0 TSS  
## 23066 CDS  
## 0 promoters  
## 0 splicing  
## 19954 relCDS
```

## QC

### Dispersion

Dispersion plot for genes in cuff: (Overdispersion can lead to innacurate quants)

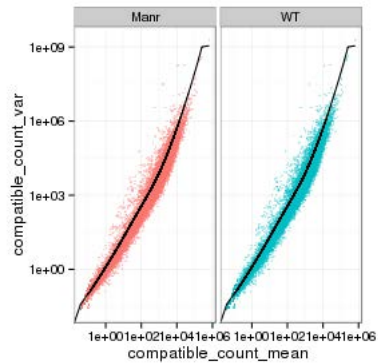

### Cross-replicate variability (fpkmSCVplot)

Differences in CV 2 can result in lower numbers of differentially expressed genes due to a higher degree of variability between replicate fpkm estimates.

Genes:

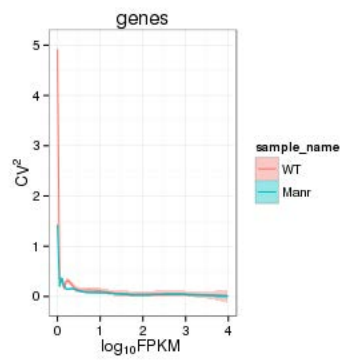

Isoforms:

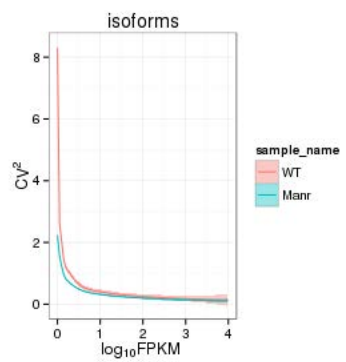

## MvA plot

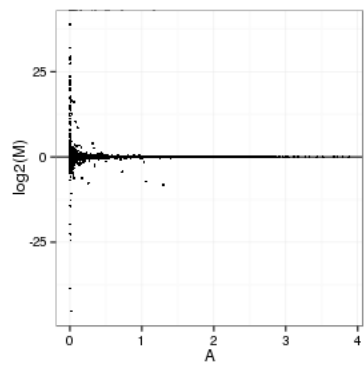

## MvA plot counts

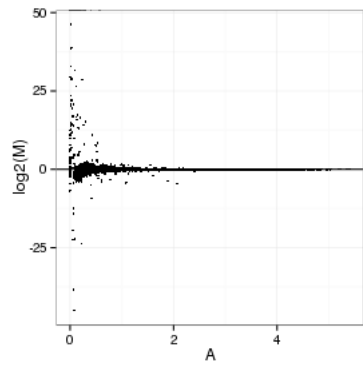

## Scatterplot matrix

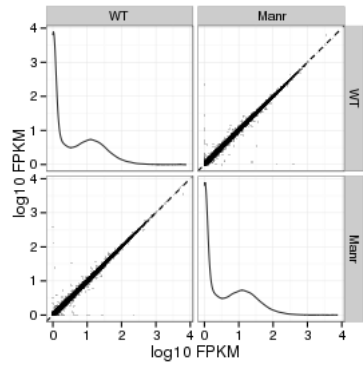

## Distributions

### Boxplots

Boxplot (genes)

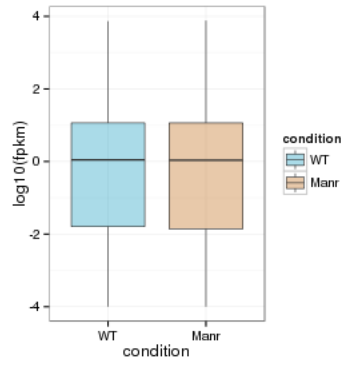

Boxplot (genes, replicates)

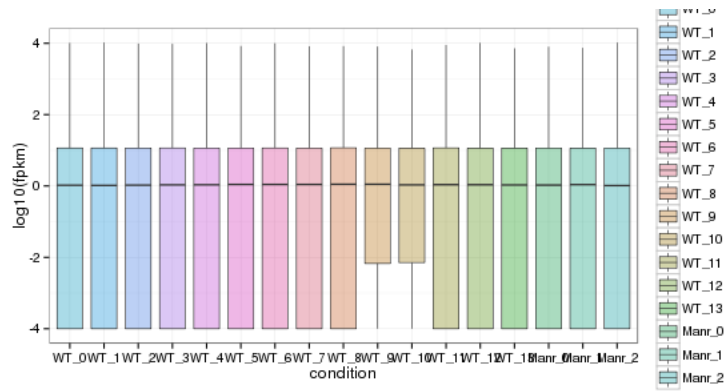

Boxplot (isoforms)

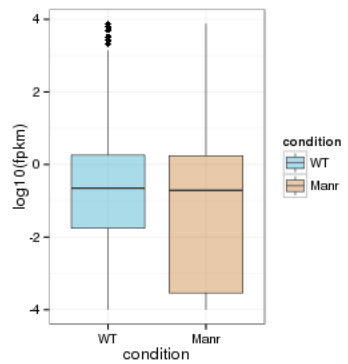

Boxplot (isoforms, replicates)

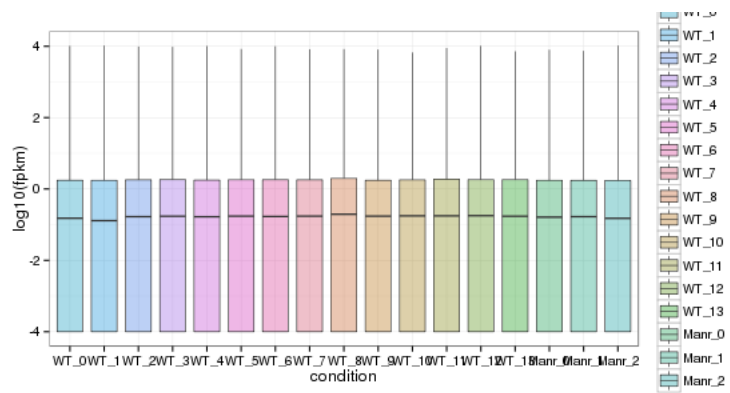

## Density

Density (genes)

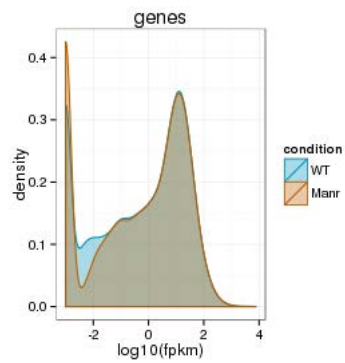

Density (genes, replicates)

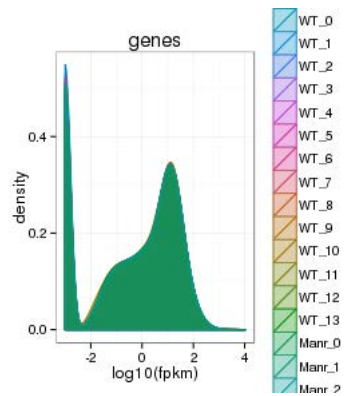

# Clustering

## Replicate Clusters

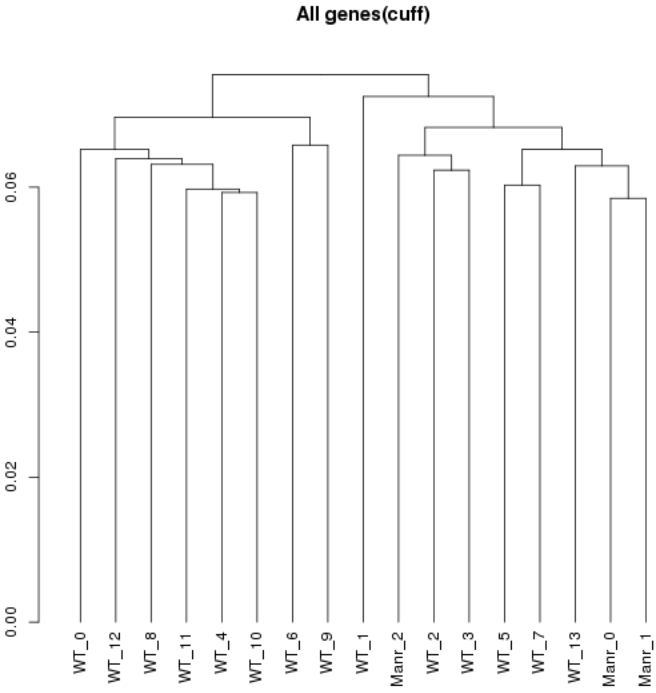

## NULL

## PCA (genes)



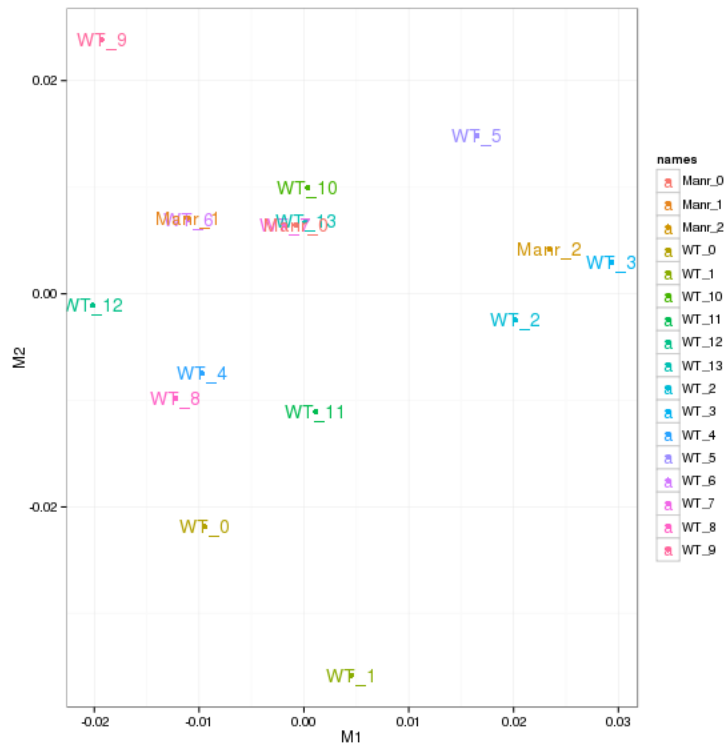

**KO assessment**  
**Endogenous lncRNA expression**



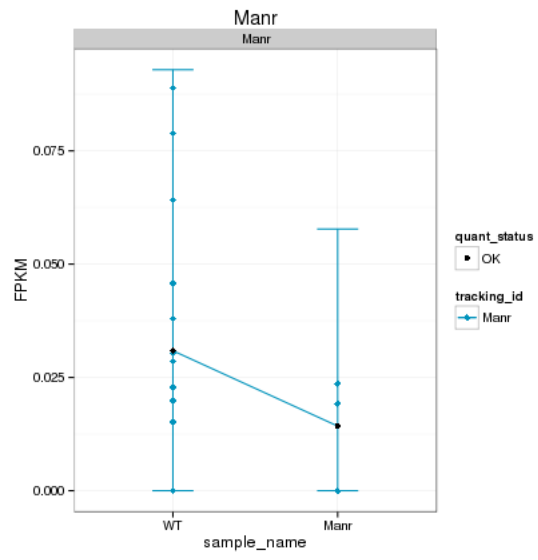

Endogenous expression of Manr isoforms:

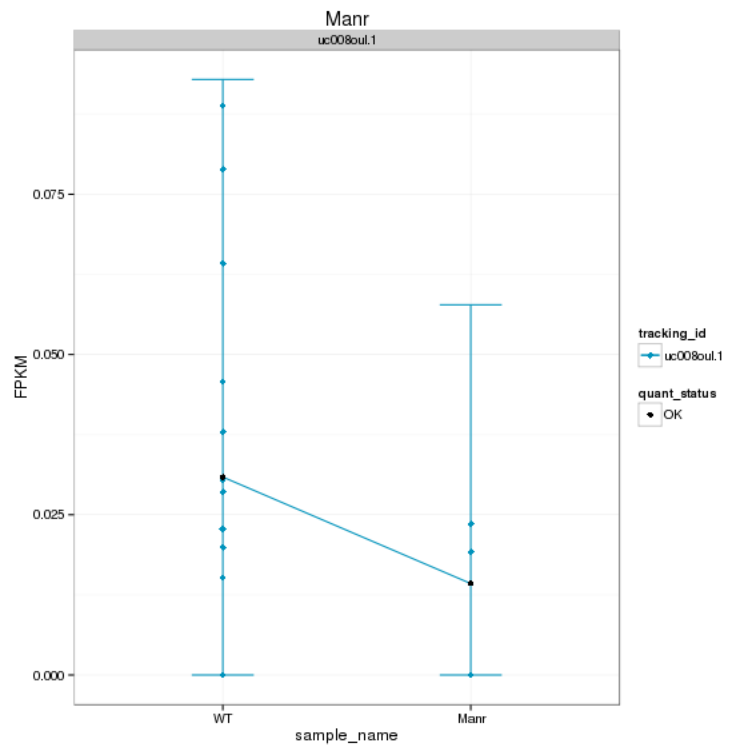

Barplot of gene expression:

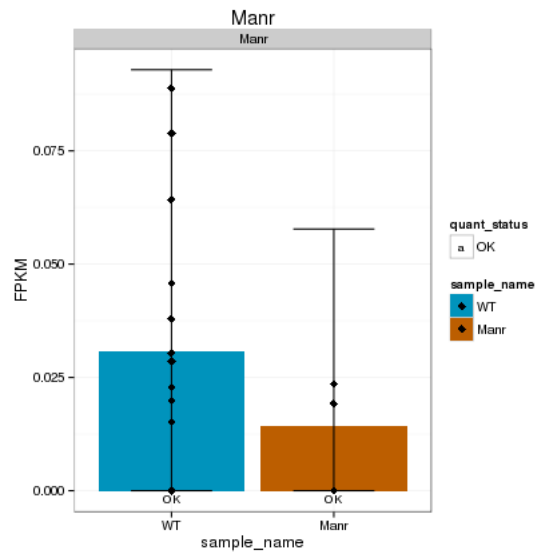

Barplot of isoform expression:

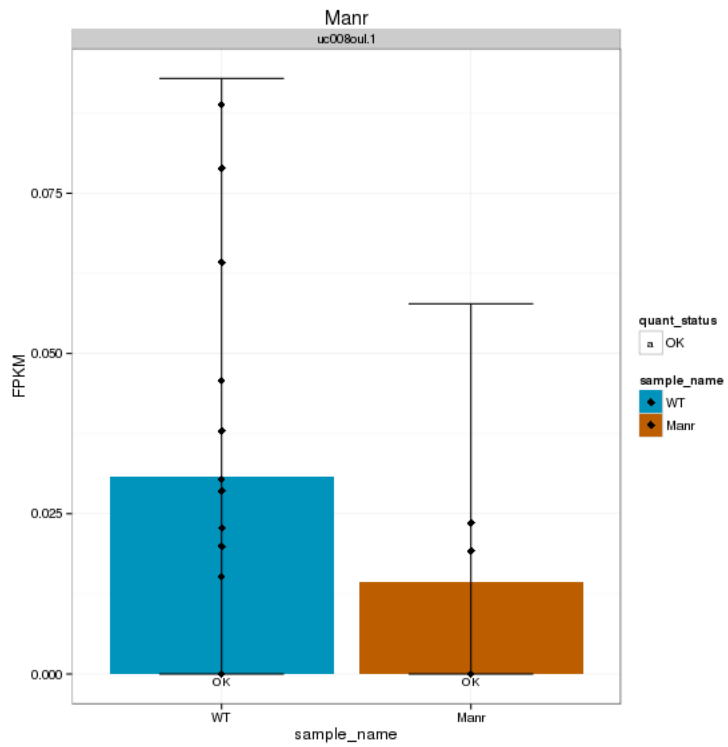

## LacZ expression

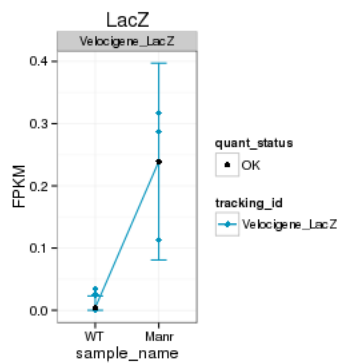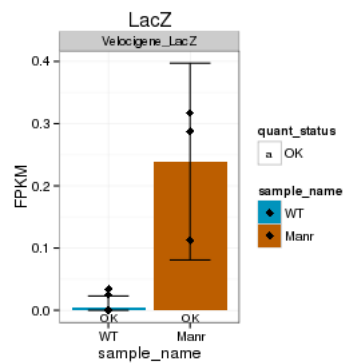

## Digital Genotyping (LacZ vs Endogenous lincRNA and Sex)

Eif2s3y is a y-expressed gene, Xist is an x-expressed gene Expression plot (endogenous linc, lacZ, Y-expressed gene):

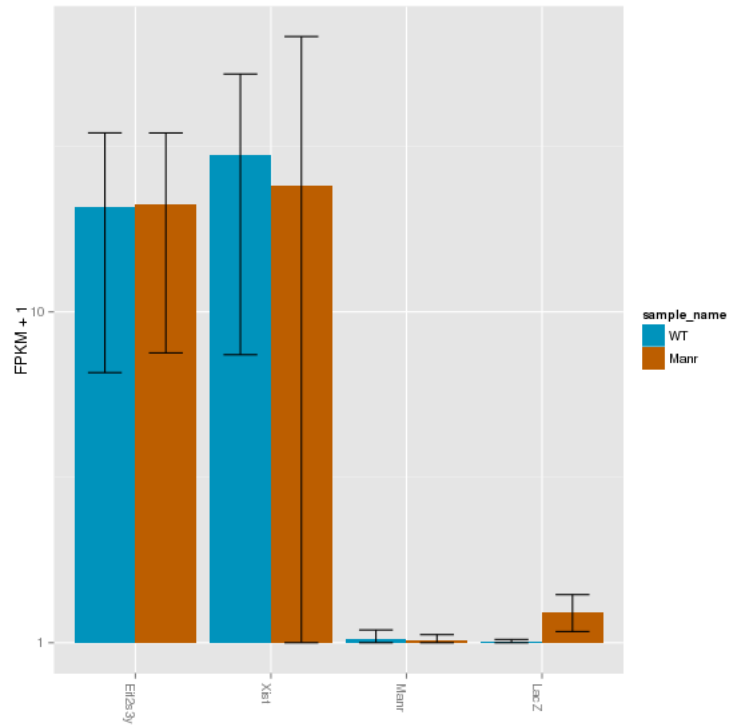

Expression heatmap:

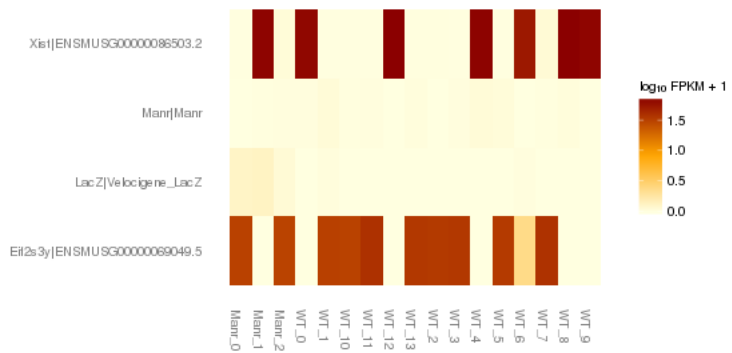

Track visualization

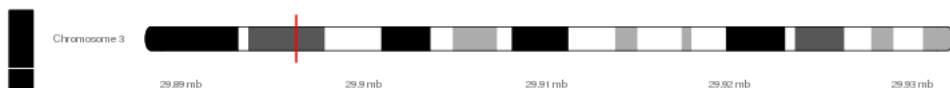

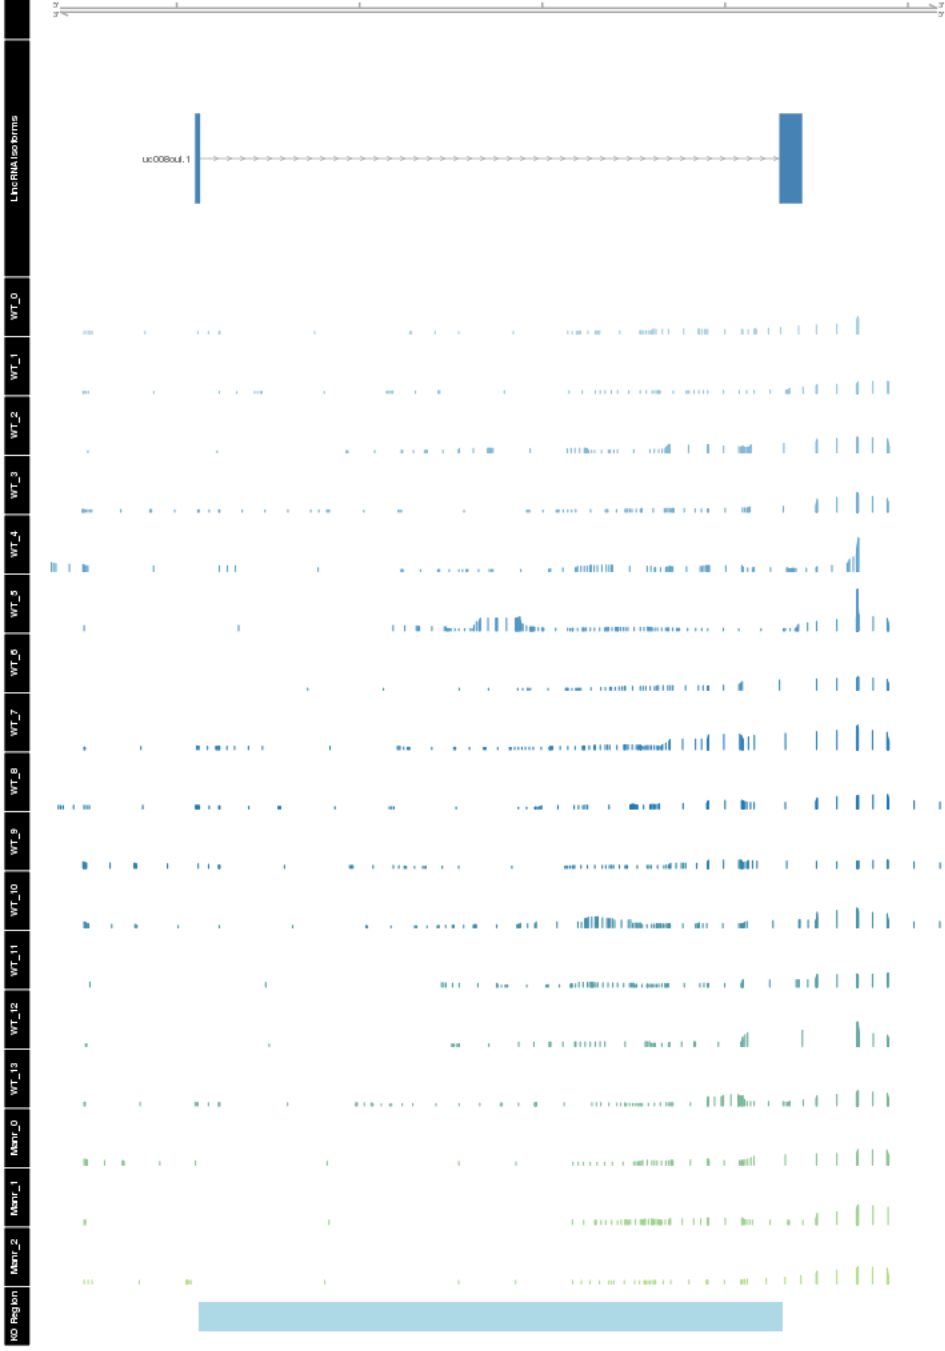

# Differential Analysis

## Differential Genes

There are 49 significantly differentially expressed genes. They are:

|    | <b>geneAnnot\$gene_short_name</b> |
|----|-----------------------------------|
| 1  | Slc5a5                            |
| 2  | Col6a1                            |
| 3  | Arrdc2                            |
| 4  | Nes                               |
| 5  | Lpl                               |
| 6  | Pdk4                              |
| 7  | Pttg1                             |
| 8  | Adi1                              |
| 9  | Pomc                              |
| 10 | Serpina3n                         |
| 11 | Fos                               |
| 12 | Arc                               |
| 13 | Nr4a1                             |
| 14 | Podxl                             |
| 15 | Lcn2                              |
| 16 | Fabp5                             |
| 17 | Anxa5                             |
| 18 | Tshb                              |
| 19 | Tmem144                           |
| 20 | Rps3a1                            |
| 21 | Nr4a3                             |
| 22 | Tinagl1                           |
| 23 | Hddc3                             |
| 24 | Dis3l                             |
| 25 | Arhgap27                          |
| 26 | Pla2g3                            |
| 27 | Plvap                             |
| 28 | Lars2                             |
| 29 | Tmem59l                           |
| 30 | Egr2                              |
| 31 | Egr1                              |
| 32 | Sgsm1                             |
| 33 | Tuba1c                            |
| 34 | Snhg11                            |
| 35 | Acp1                              |
| 36 | Epcam                             |
| 37 | Junb                              |

- 38 Tpm3-rs7
- 39 Trank1
- 40 Gm4
- 41 Rps15
- 42 Bpifb3
- 43 Gm9008
  
- 44 Gm7292
- 45 Srp54a
- 46 Wdfy1
- 47 Scnm1
- 48 AA465934
- 49 Gm26924

### Matrix of gene significant differences between conditions

(skip for Brainmap wt-v-ko comparisons)

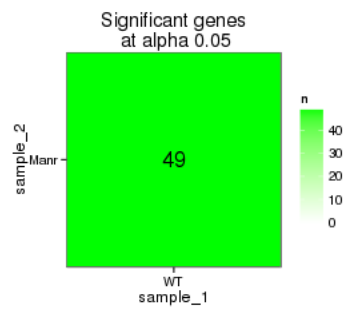

### Significant gene expression differences between conditions

Expression plot (genes):(turned off)



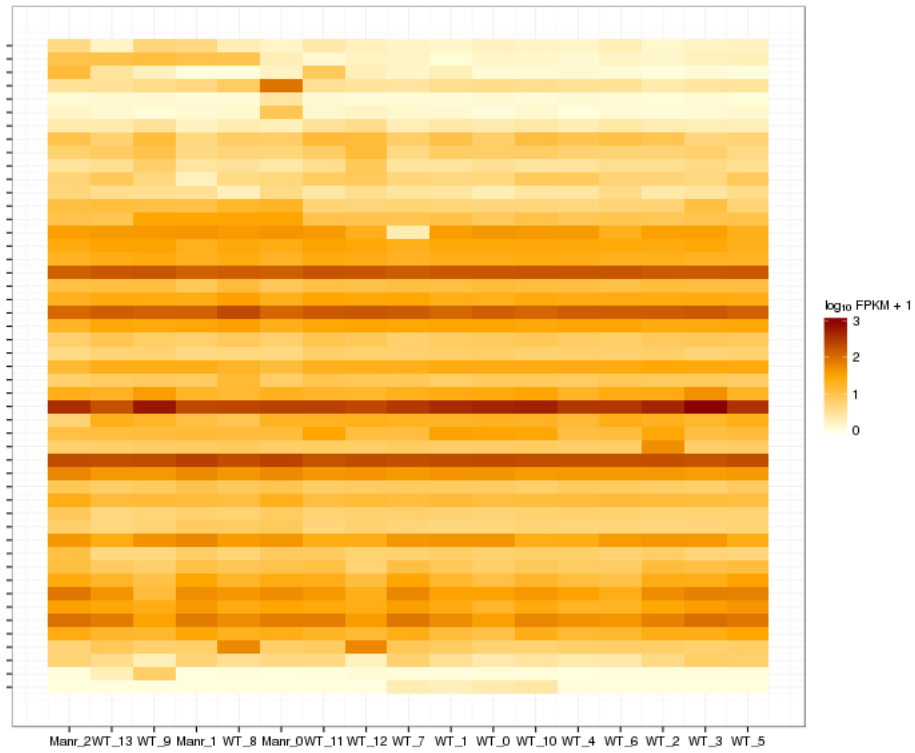

Significant genes with expression >50fpkm (any condition):(turned off)

An individual look at each of the highly expressed significantly differentially regulated genes: (eval=false for first pass)

### Expression-level/significance relationship

Scatter plot of significant genes only:

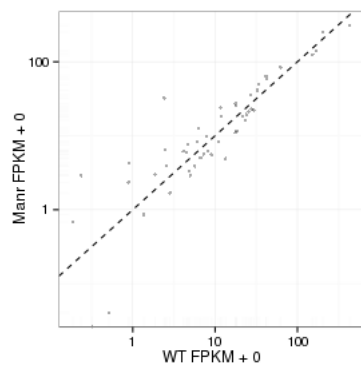

### Volcano Plot

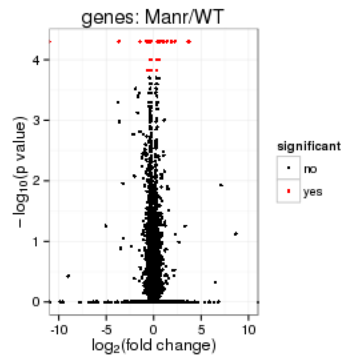

### Volcano plot with significant genes only:

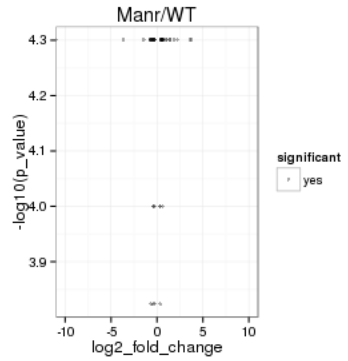

### FoldChange Heatmap

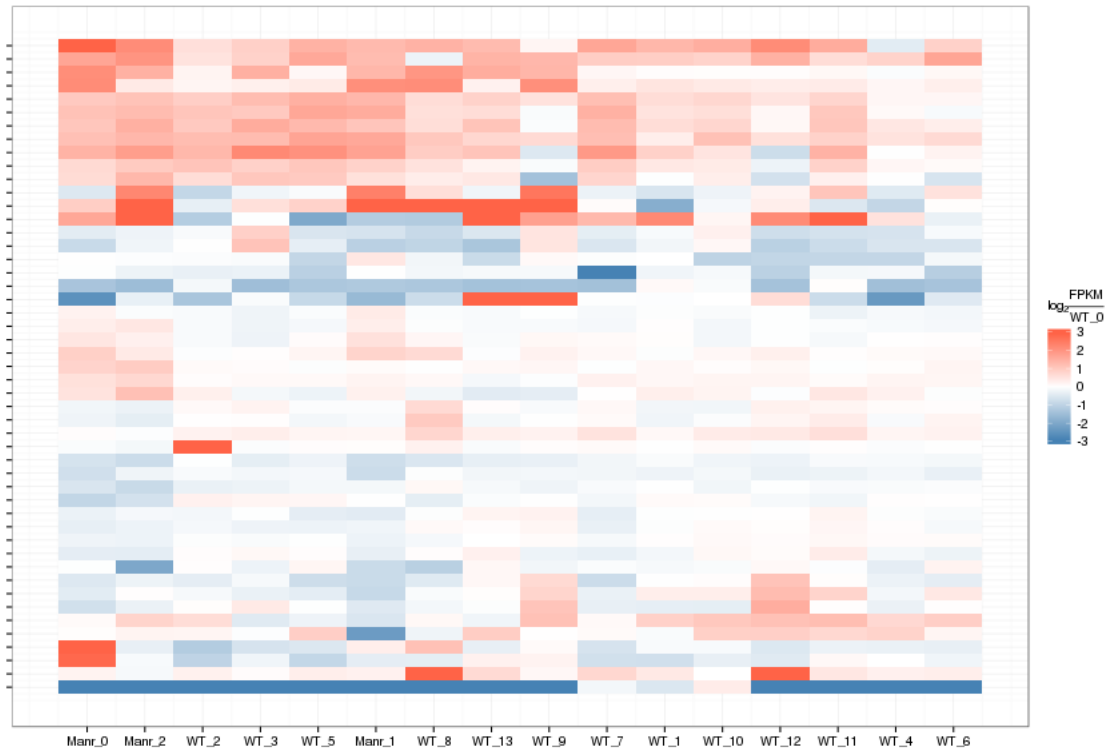

## Differential Splicing

### Differential Isoforms between conditions

Per isoform difference between conditions:

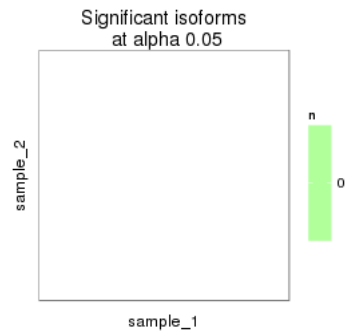

These isoforms are:

[1] "no sig isoforms"

Gene-level DE isoform heatmap

```
## [1] "no sig isoforms"
```

Isoform foldchange heatmap by isoform:

```
## [1] "no sig isoforms"
```

## Differential Splicing between conditions

(eval false for first pass)

Per condition differences in isoforms (Does gene have diff piechart between conditions?)

These genes are:

Splicing heatmap by isoform:

Splicing heatmap by gene

The following are significantly differentially spliced genes (relative portion of isoform per condition):

# Gene/Pathway Analysis

## GSEA

Enrichment and zscores are calculated based on expression in KO vs WT ( $\text{fpkmKO}/\text{fpkmWT}$ ), so genes that are down regulated in KO are shown in blue, while upregulation is shown in red.

KOWT Blue = down in KO Red = Up in KO

Biocarta enrichment:

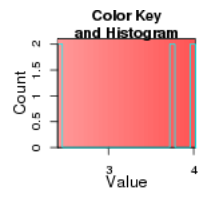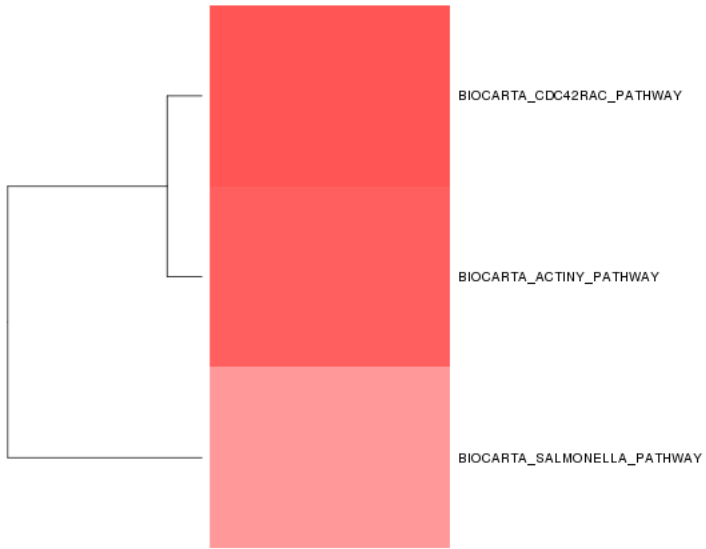

Biocarta zscore:

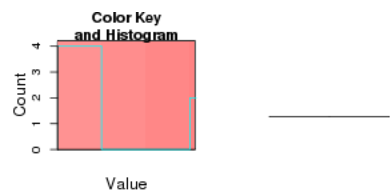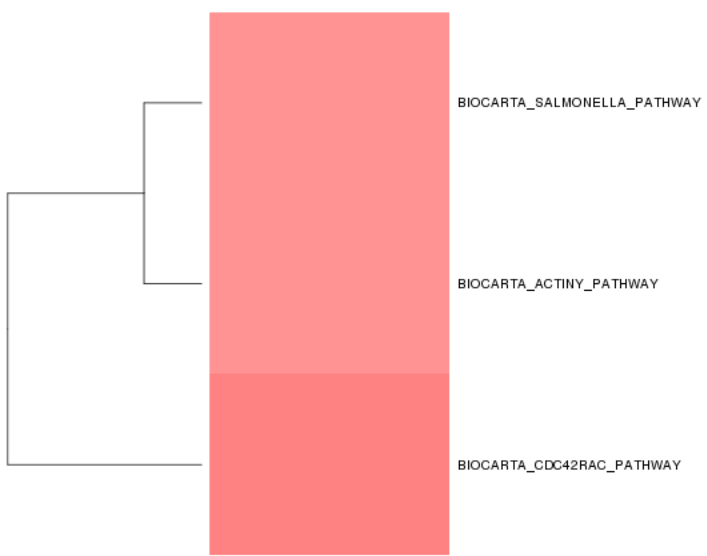

Reactome enrichment:

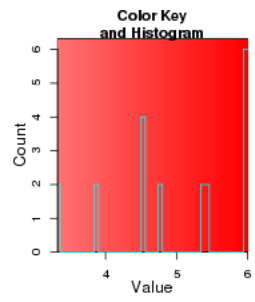

\_\_\_\_\_

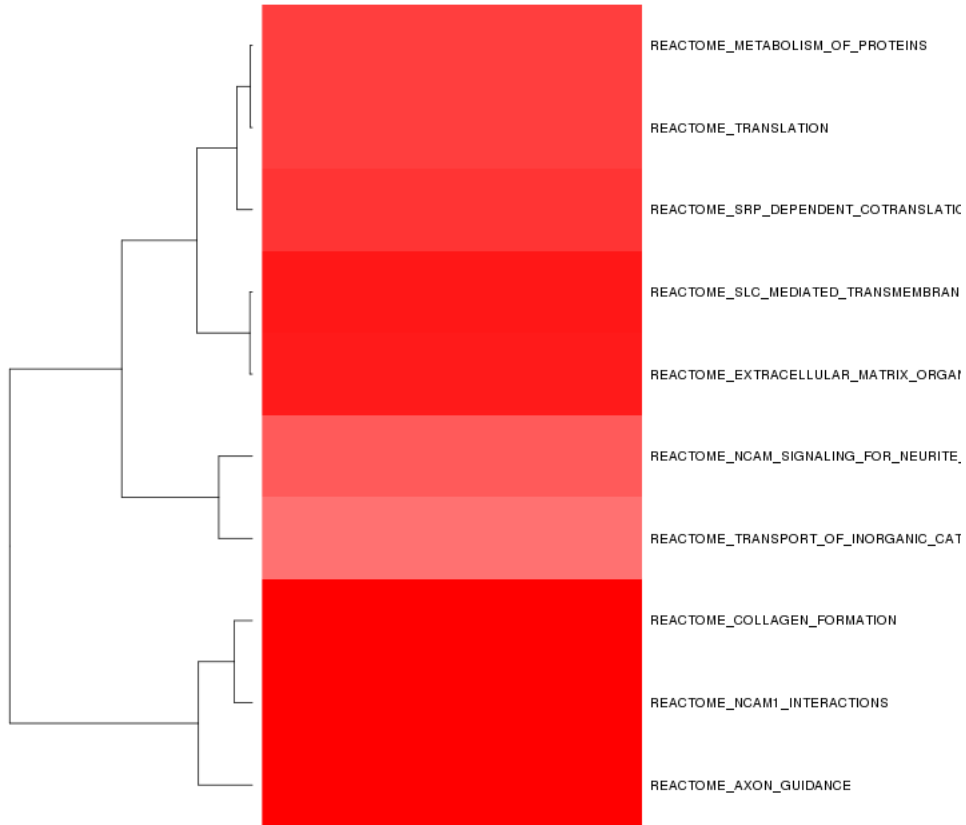

Reactome zscore:

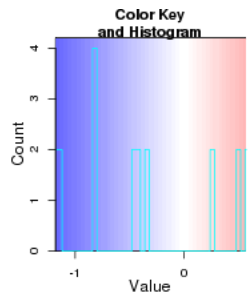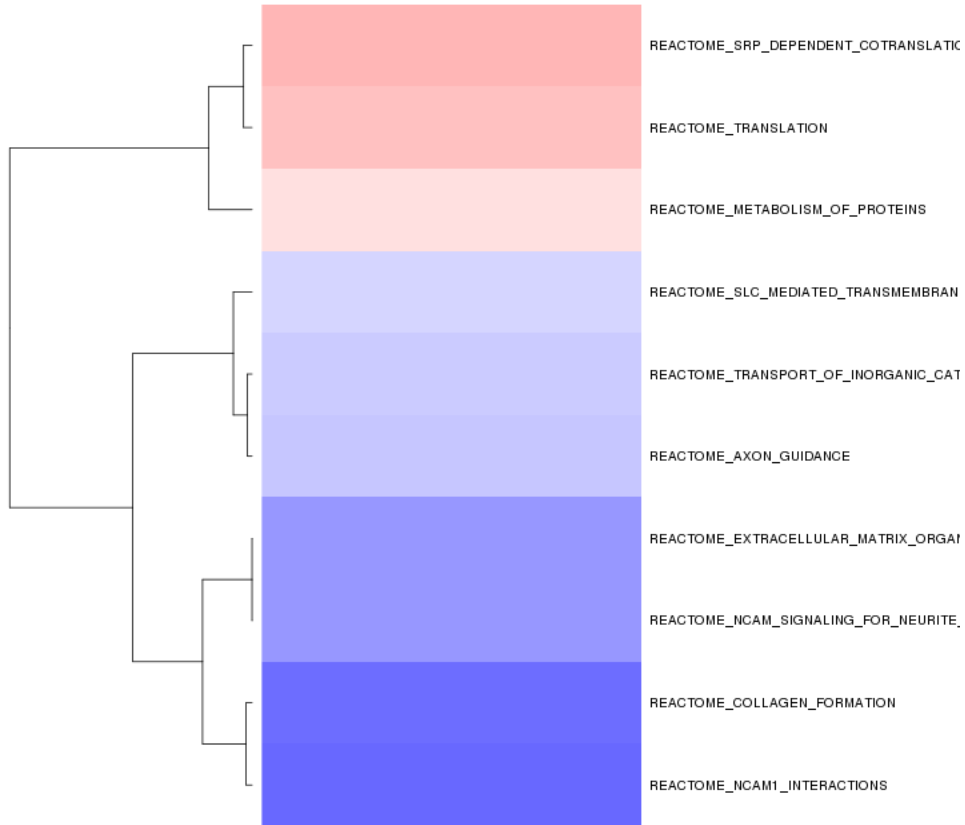

Kegg enrichment:

## Error: argument is of length zero

Kegg zscore:

## Error: incorrect number of dimensions



```
## Error: object 'x_ordered' not found
```

```
## Error: error in evaluating the argument 'x' in selecting a method for function 'as.matrix': Error: object 'x_ordered' not found
```

```
## Error: object 'x_ordered' not found
```

Interneuron enrichment:

```
## [1] "Not enough significant categories to print a heatmap!"
```

Interneuron zscore:

```
## [1] "Not enough significant categories to print a heatmap!"
```

Oncogene enrichment:

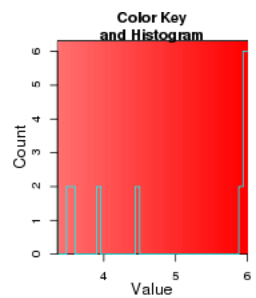

\_\_\_\_\_

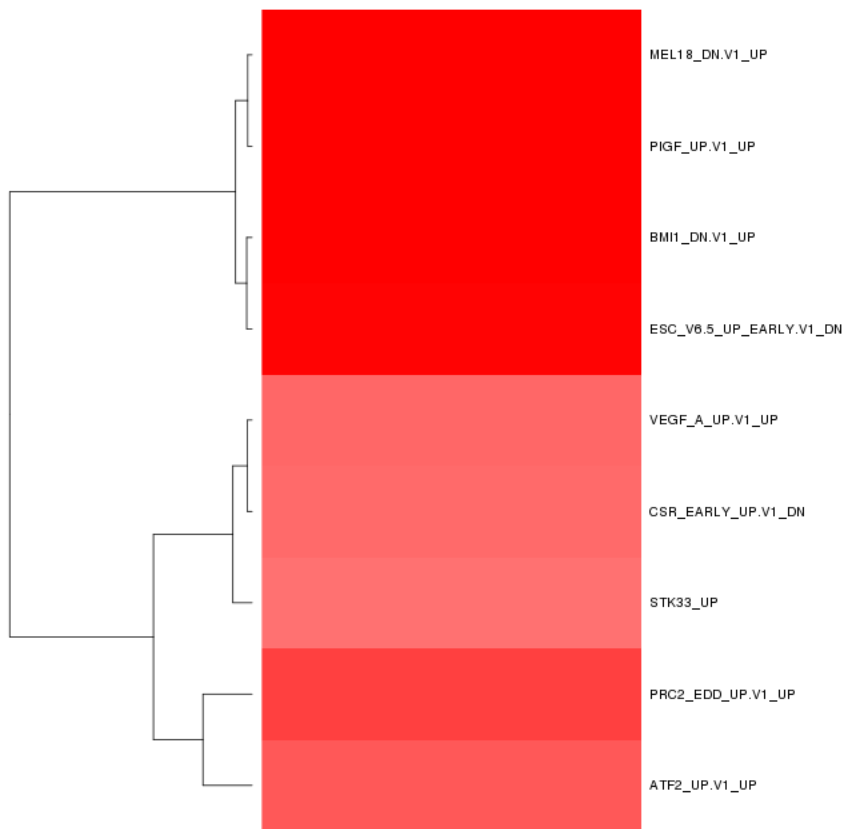

Oncogene zscore:

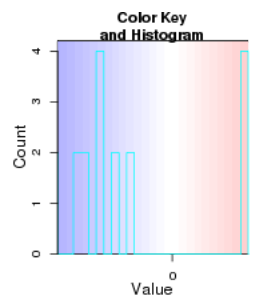

\_\_\_\_\_

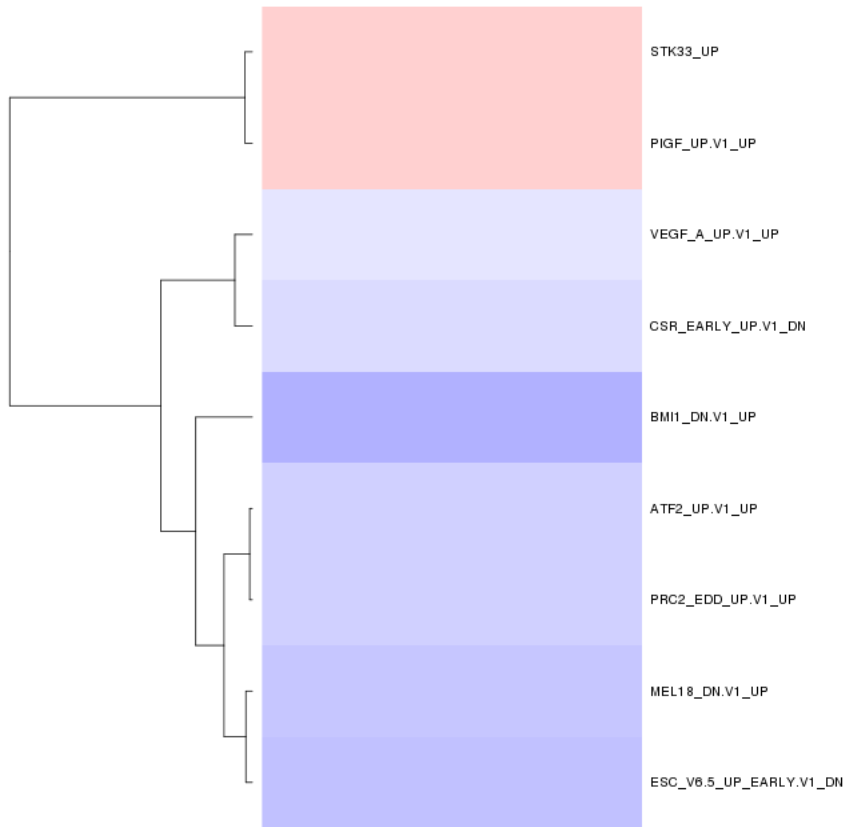

Immuno enrichment:

## Error: subscript out of bounds

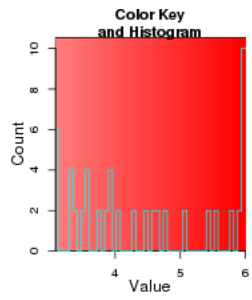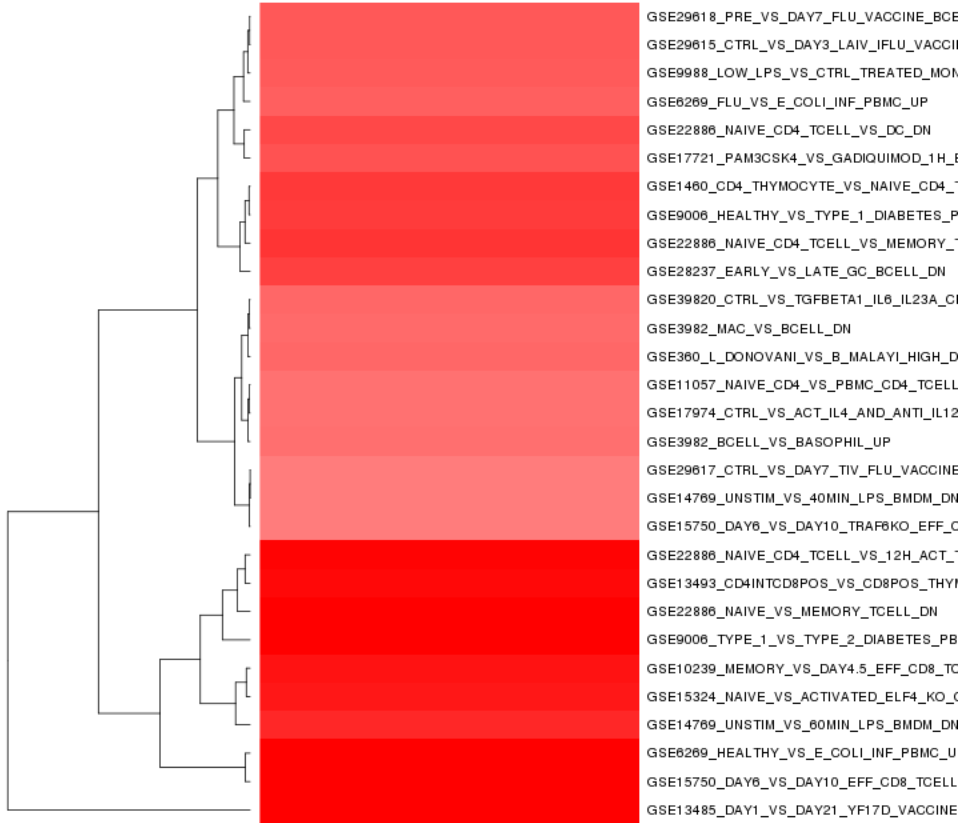

Immuno zscore:

## Error: subscript out of bounds

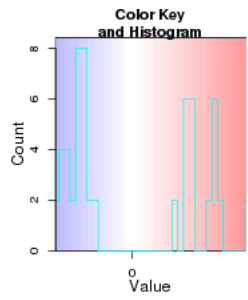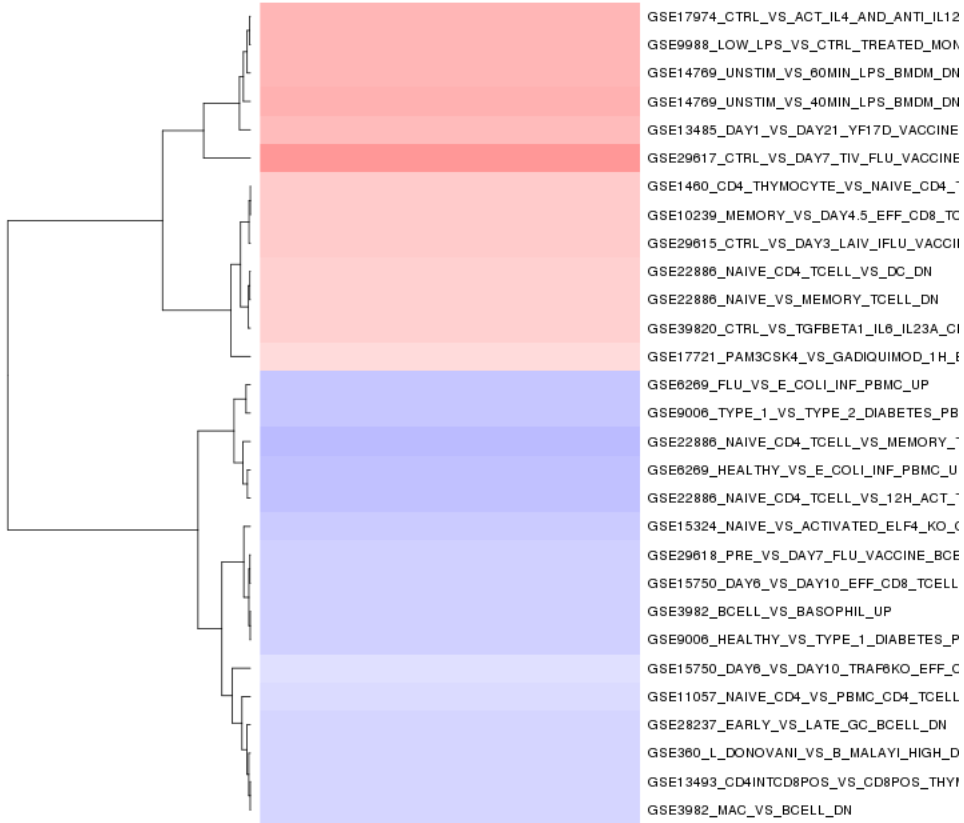

TF enrichment:

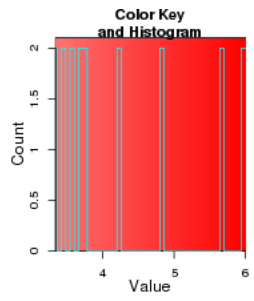

\_\_\_\_\_

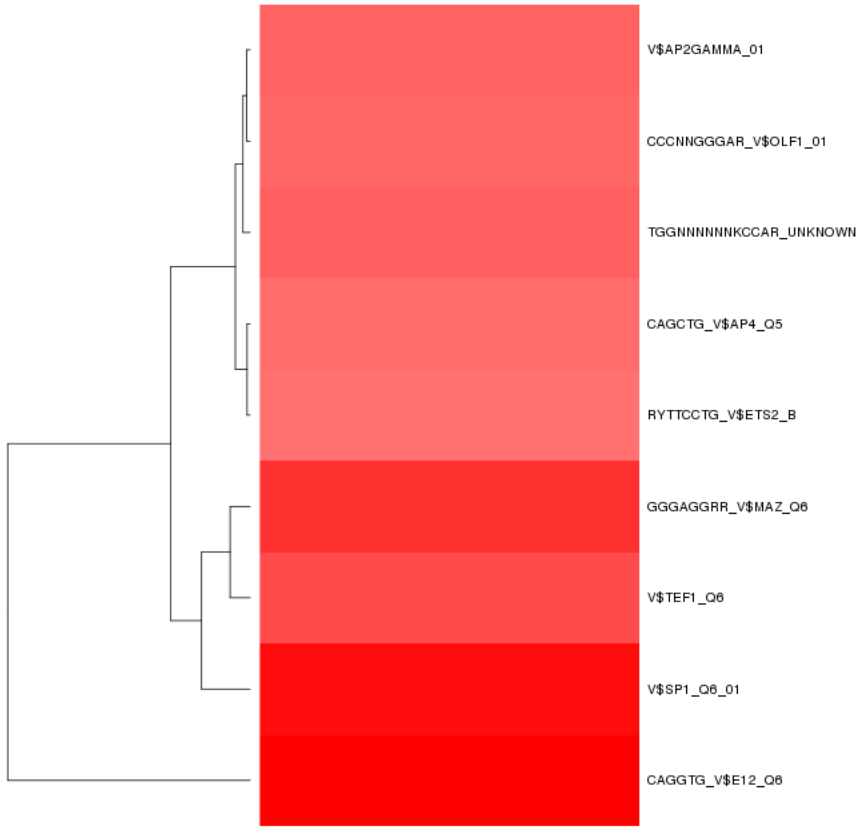

TF zscore:

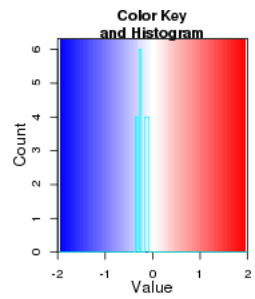

\_\_\_\_\_

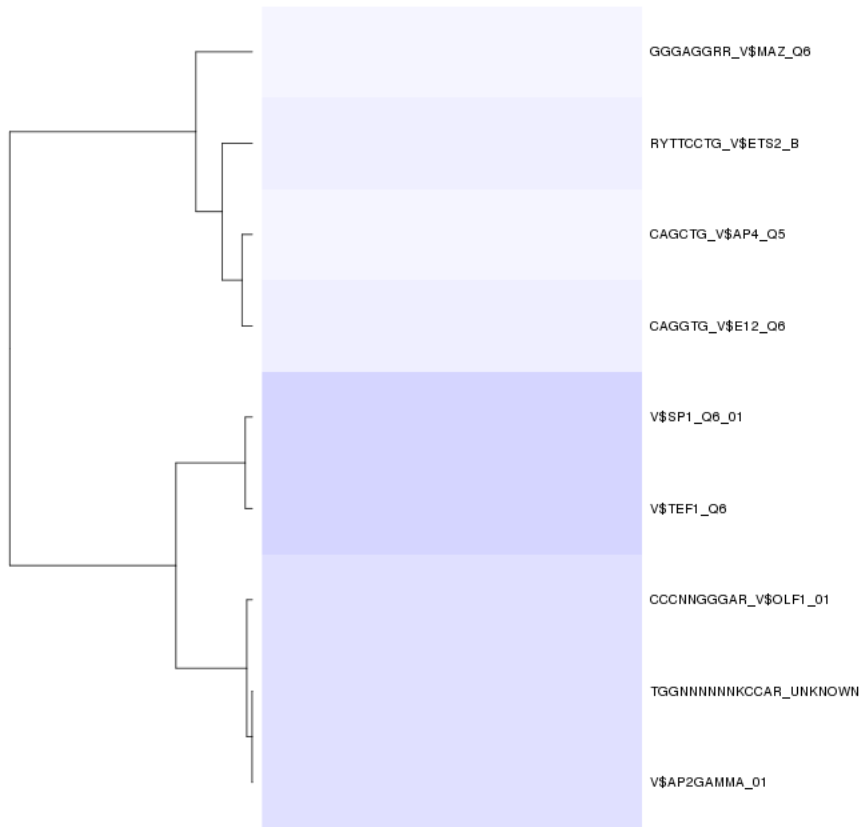

## GO enrichment

Cluster profiler used to call enrichments of significantly differentially regulated genes that map to Entrez IDs.

```
## [1] "ERROR: The estimated pi0 <= 0. Check that you have valid p-values or use another lambda method."
```

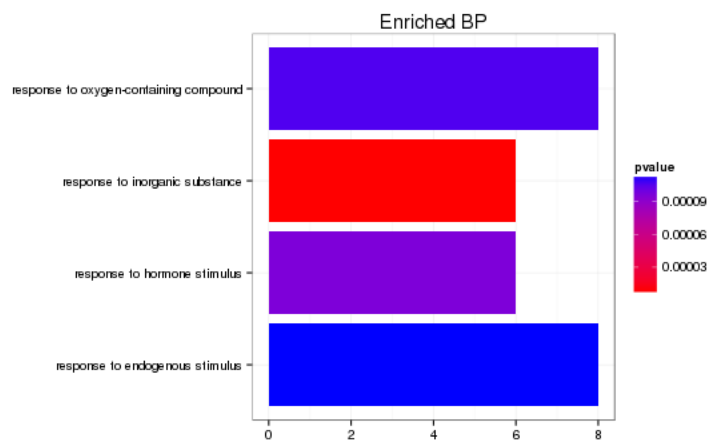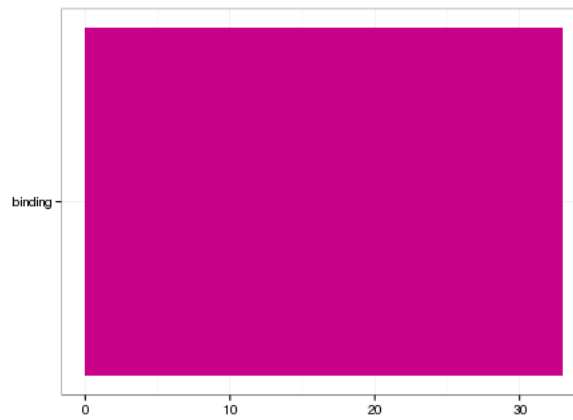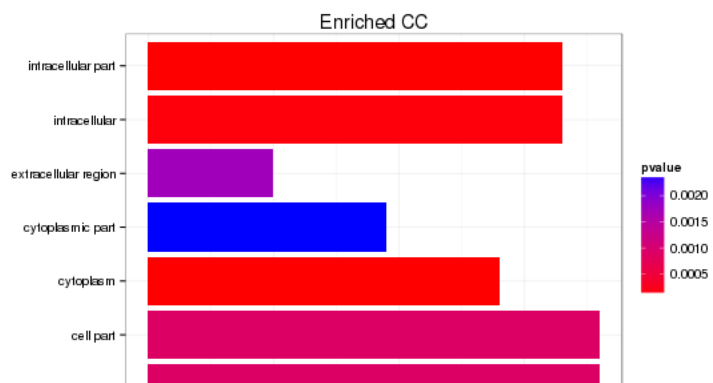



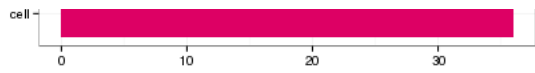

```
## Error: need finite 'xlim' values
```

**Enrichment or depletion for stage-specific cell cycle markers**

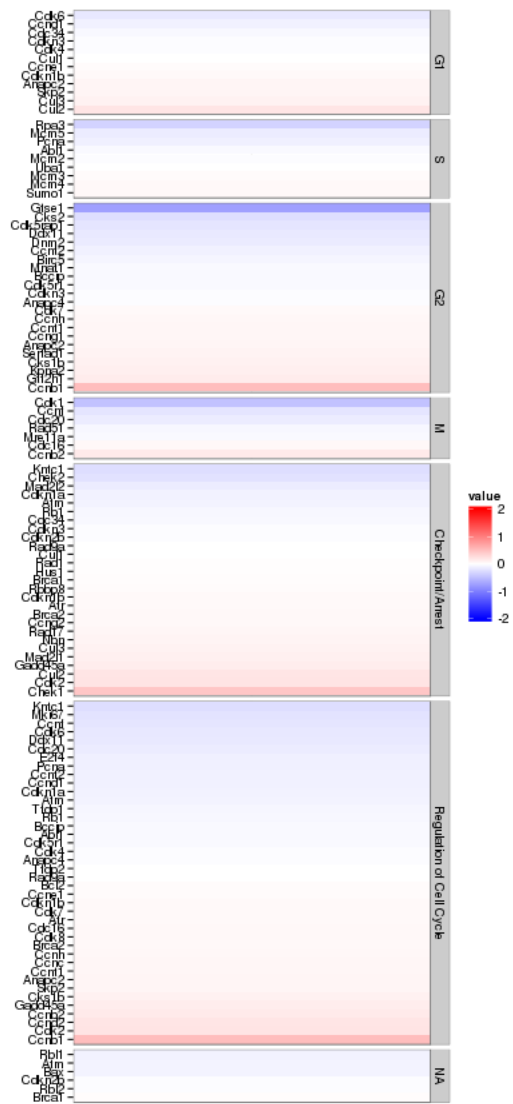

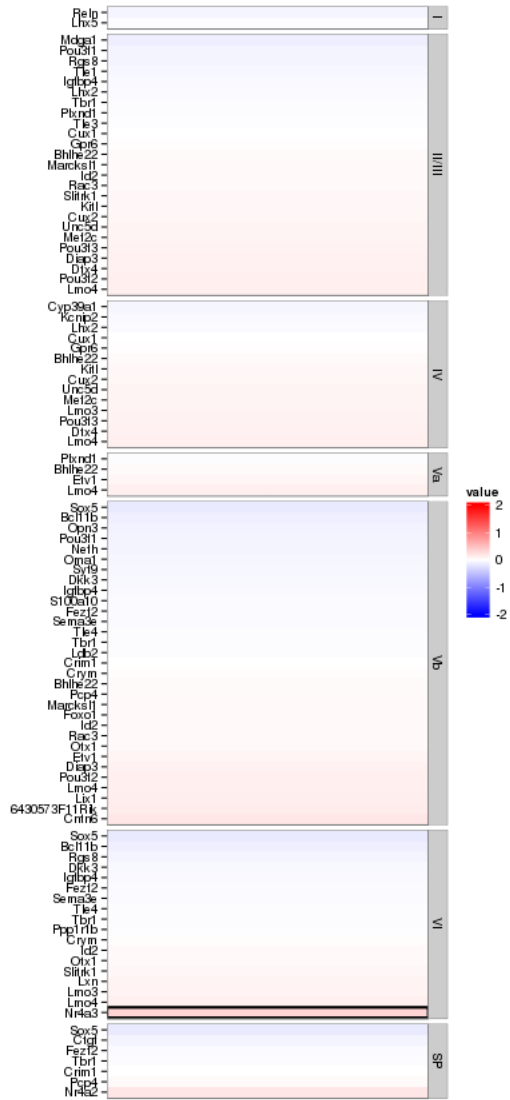

Enrichment or depletion for specific neural cell types

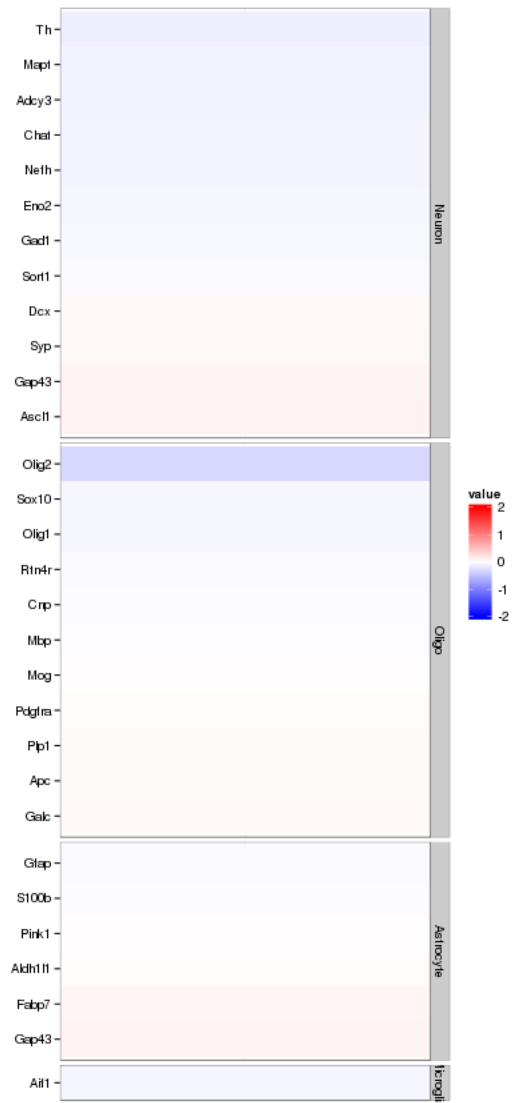

**Enrichment or Depletion of neural differentiation markers**

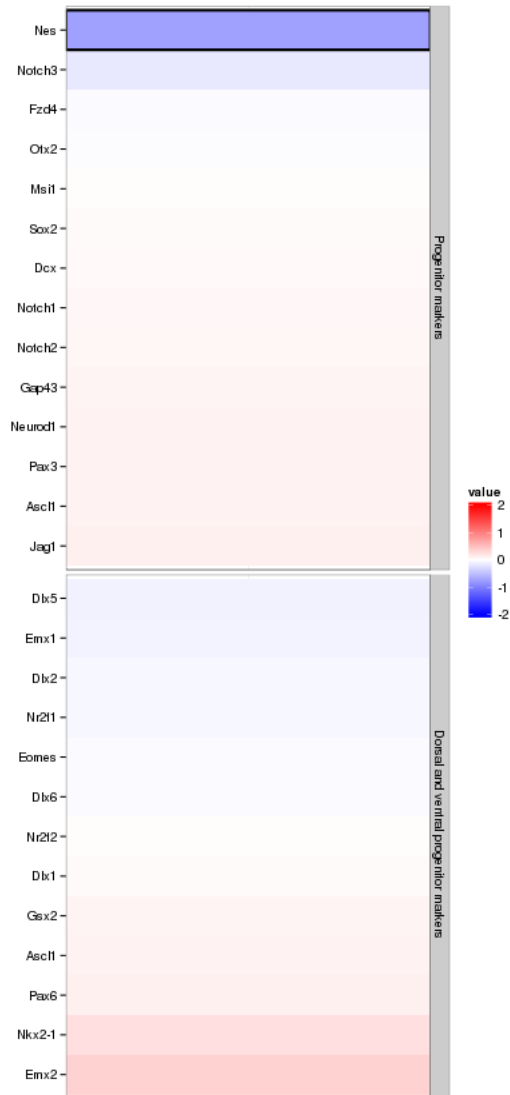

## Cis vs Trans (locally)

$\log_2$  Foldchange and test statistic are calculated with the ratio of  $\text{fpm(KO)}/\text{fpm(WT)}$ , thus the test\_stat is positive if a gene is higher in the KO and negative if a gene has lower expression in the KO

The pvalue for 0 genes significantly regulated in a region this size is: 1

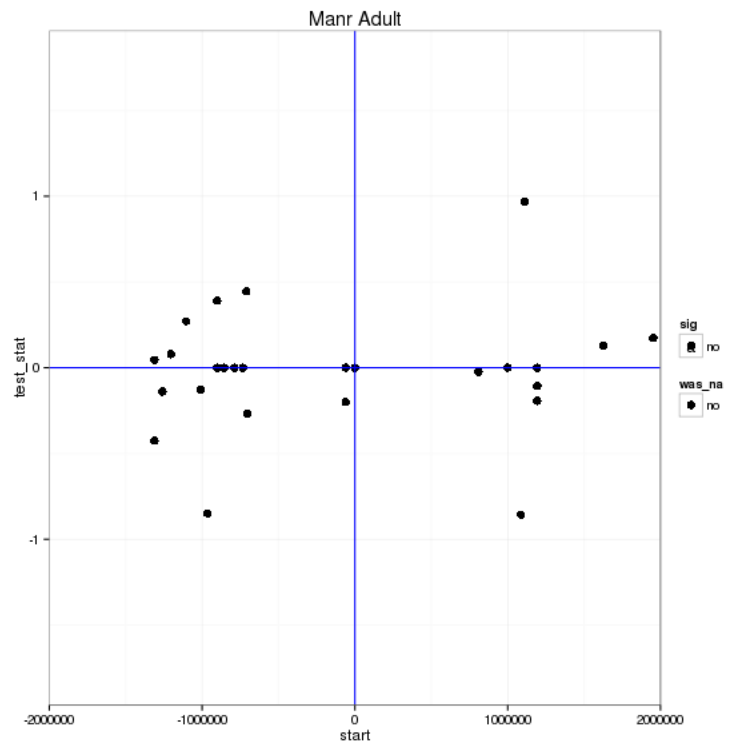

## Notes

Samples used are:

10

- 1 JR729
- 2 JR728
- 3 JR796
- 4 JR797
- 5 JR740
- 6 JR800
- 7 JR827
- 8 JR778
- 9 JR734
- 10 JR802
- 11 JR803
- 12 JR735
- 13 JR785
- 14 JR781

15 JR780  
16 JR737  
17 JR801

## Replicates

| file                                                                          | sample_name | replicate | rep_name | total_mass  | norm_mass   | internal_scale | external_scale |
|-------------------------------------------------------------------------------|-------------|-----------|----------|-------------|-------------|----------------|----------------|
| 1 /n/rinn_data1/seq/fgoff/Projects/BrainMap/data/quants/JR729/abundances.cxb  | WT          | 0         | WT_0     | 26334400.00 | 34899700.00 | 0.75           | 1.00           |
| 2 /n/rinn_data1/seq/fgoff/Projects/BrainMap/data/quants/JR728/abundances.cxb  | WT          | 1         | WT_1     | 20329200.00 | 34899700.00 | 0.58           | 1.00           |
| 3 /n/rinn_data1/seq/fgoff/Projects/BrainMap/data/quants/JR796/abundances.cxb  | WT          | 2         | WT_2     | 34089000.00 | 34899700.00 | 0.97           | 1.00           |
| 4 /n/rinn_data1/seq/fgoff/Projects/BrainMap/data/quants/JR797/abundances.cxb  | WT          | 3         | WT_3     | 28103300.00 | 34899700.00 | 0.80           | 1.00           |
| 5 /n/rinn_data1/seq/fgoff/Projects/BrainMap/data/quants/JR740/abundances.cxb  | WT          | 4         | WT_4     | 35808200.00 | 34899700.00 | 1.03           | 1.00           |
| 6 /n/rinn_data1/seq/fgoff/Projects/BrainMap/data/quants/JR800/abundances.cxb  | WT          | 5         | WT_5     | 37012200.00 | 34899700.00 | 1.06           | 1.00           |
| 7 /n/rinn_data1/seq/fgoff/Projects/BrainMap/data/quants/JR827/abundances.cxb  | WT          | 6         | WT_6     | 27786600.00 | 34899700.00 | 0.80           | 1.00           |
| 8 /n/rinn_data1/seq/fgoff/Projects/BrainMap/data/quants/JR778/abundances.cxb  | WT          | 7         | WT_7     | 39541900.00 | 34899700.00 | 1.15           | 1.00           |
| 9 /n/rinn_data1/seq/fgoff/Projects/BrainMap/data/quants/JR734/abundances.cxb  | WT          | 8         | WT_8     | 34480600.00 | 34899700.00 | 1.00           | 1.00           |
| 10 /n/rinn_data1/seq/fgoff/Projects/BrainMap/data/quants/JR802/abundances.cxb | WT          | 9         | WT_9     | 45467400.00 | 34899700.00 | 1.29           | 1.00           |
| 11 /n/rinn_data1/seq/fgoff/Projects/BrainMap/data/quants/JR803/abundances.cxb | WT          | 10        | WT_10    | 52130400.00 | 34899700.00 | 1.49           | 1.00           |
| 12 /n/rinn_data1/seq/fgoff/Projects/BrainMap/data/quants/JR735/abundances.cxb | WT          | 11        | WT_11    | 34994400.00 | 34899700.00 | 1.01           | 1.00           |
| 13 /n/rinn_data1/seq/fgoff/Projects/BrainMap/data/quants/JR785/abundances.cxb | WT          | 12        | WT_12    | 34173600.00 | 34899700.00 | 0.97           | 1.00           |
| 14 /n/rinn_data1/seq/fgoff/Projects/BrainMap/data/quants/JR781/abundances.cxb | WT          | 13        | WT_13    | 41538900.00 | 34899700.00 | 1.20           | 1.00           |
| 15 /n/rinn_data1/seq/fgoff/Projects/BrainMap/data/quants/JR780/abundances.cxb | Manr        | 0         | Manr_0   | 40782700.00 | 34899700.00 | 1.17           | 1.00           |
| 16 /n/rinn_data1/seq/fgoff/Projects/BrainMap/data/quants/JR737/abundances.cxb | Manr        | 1         | Manr_1   | 40835900.00 | 34899700.00 | 1.19           | 1.00           |
| 17 /n/rinn_data1/seq/fgoff/Projects/BrainMap/data/quants/JR801/abundances.cxb | Manr        | 2         | Manr_2   | 34495500.00 | 34899700.00 | 0.96           | 1.00           |

## Session Info

```
## R version 3.0.2 (2013-09-25)
## Platform: x86_64-unknown-linux-gnu (64-bit)
##
## locale:
## [1] LC_CTYPE=en_US.UTF-8      LC_NUMERIC=C
## [3] LC_TIME=en_US.UTF-8      LC_COLLATE=en_US.UTF-8
## [5] LC_MONETARY=en_US.UTF-8  LC_MESSAGES=en_US.UTF-8
## [7] LC_PAPER=en_US.UTF-8     LC_NAME=C
## [9] LC_ADDRESS=C             LC_TELEPHONE=C
## [11] LC_MEASUREMENT=en_US.UTF-8 LC_IDENTIFICATION=C
##
## attached base packages:
## [1] grid      parallel  methods  stats    graphics  grDevices  utils
## [8] datasets  base
##
## other attached packages:
## [1] plyr_1.8.1
## [2] stringr_0.6.2
## [3] seqbias_1.10.0
```

```

## [4] BSgenome.Mmusculus.UCSC.mm10_1.3.19
## [5] BSgenome_1.30.0
## [6] Biostrings_2.30.1
## [7] gdata_2.13.3
## [8] GO.db_2.10.1
## [9] org.Mm.eg.db_2.10.1
## [10] clusterProfiler_1.13.1
## [11] DOSE_2.0.0
## [12] ReactomePA_1.6.1
## [13] AnnotationDbi_1.24.0
## [14] Biobase_2.22.0
## [15] mgcv_1.7-29
## [16] nlme_3.1-117
## [17] RMySQL_0.9-3
## [18] RColorBrewer_1.0-5
## [19] gridExtra_0.9.1
## [20] gtable_0.1.2
## [21] marray_1.40.0
## [22] gplots_2.13.0
## [23] GSA_1.03
## [24] limma_3.18.13
## [25] xtable_1.7-3
## [26] cummeRbund_2.7.2
## [27] Gviz_1.6.0
## [28] rtracklayer_1.22.7
## [29] GenomicRanges_1.14.4
## [30] XVector_0.2.0
## [31] IRanges_1.20.7
## [32] fastcluster_1.1.13
## [33] reshape2_1.4
## [34] ggplot2_1.0.0
## [35] RSQLite_0.11.4
## [36] DBI_0.2-7
## [37] BiocGenerics_0.8.0
## [38] knitr_1.6
##
## loaded via a namespace (and not attached):
## [1] biomaRt_2.18.0      biovizBase_1.10.8   bitops_1.0-6
## [4] caTools_1.17        cluster_1.15.2      colorspace_1.2-4
## [7] dichromat_2.0-0     digest_0.6.4        DO.db_2.7
## [10] evaluate_0.5.5      formatR_0.10        Formula_1.1-1
## [13] GenomicFeatures_1.14.5 GOSemSim_1.20.3     graph_1.40.1
## [16] graphite_1.8.1      gtools_3.4.1        Hmisc_3.14-4
## [19] igraph_0.7.1        KEGG.db_2.10.1     KernSmooth_2.23-12
## [22] labeling_0.2        lattice_0.20-29     latticeExtra_0.6-26
## [25] MASS_7.3-33         Matrix_1.1-3        munsell_0.4.2
## [28] org.Hs.eg.db_2.10.1 proto_0.3-10        qvalue_1.36.0
## [31] Rcpp_0.11.2         RCurl_1.95-4.1      reactome.db_1.46.1
## [34] Rsamtools_1.14.3    scales_0.2.4        splines_3.0.2
## [37] stats4_3.0.2        survival_2.37-7     tcltk_3.0.2
## [40] tools_3.0.2         XML_3.98-1.1        zlibbioc_1.8.0

```



## Run Info

```
##          param
## 1      cmd_line
## 2          version
## 3  SVN_revision
## 4  boost_version
## 5          genome
##
## 1 cuffdiff -p 10 -L WT,Manr -o /n/rinn_data1/seq/lgoff/Projects/BrainMap/data/diffs/Manr_vs_WT_Adult /n/rinn_data1/seq/lgoff/Projects/BrainMap/data/ann
## 2
## 3
## 4
## 5
```

# Manr KO vs WT (Embryonic)

This file shows the wt-v-ko comparison for Manr.

Cuff overview:

```
## CuffSet instance with:  
## 2 samples  
## 26754 genes  
## 77524 isoforms  
## 0 TSS  
## 23066 CDS  
## 0 promoters  
## 0 splicing  
## 19954 relCDS
```

## QC

### Dispersion

Dispersion plot for genes in cuff: (Overdispersion can lead to innacurate quants)

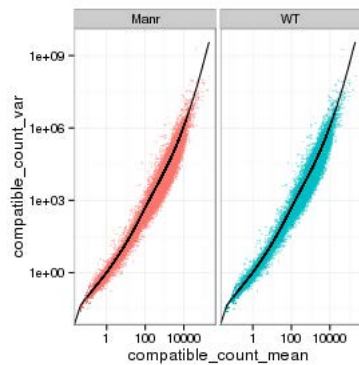

### Cross-replicate variability (fpkmSCVplot)

Differences in CV 2 can result in lower numbers of differentially expressed genes due to a higher degree of variability between replicate fpkm estimates.

Genes:

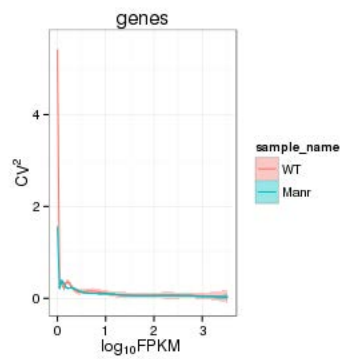

Isoforms:

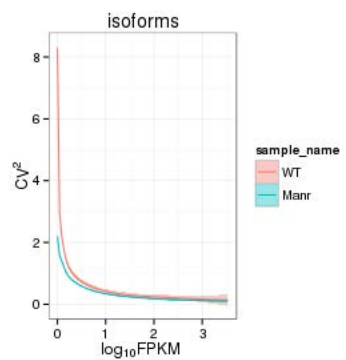

## MvA plot

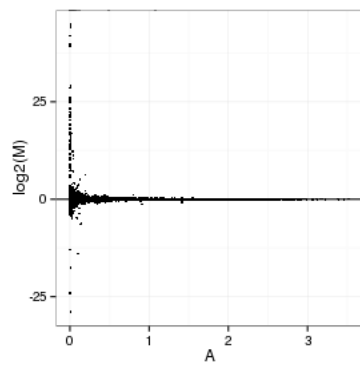

MvA plot counts

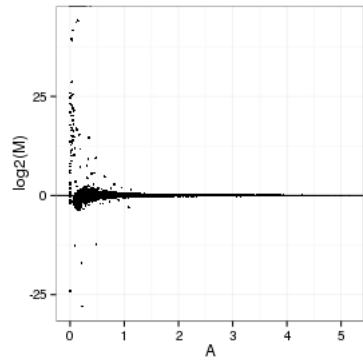

## Scatterplot matrix

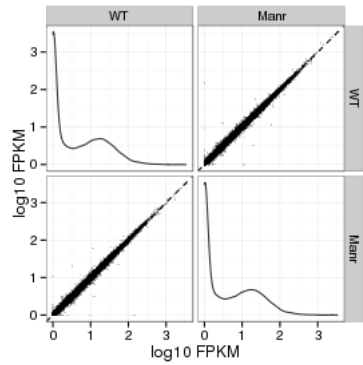

## Distributions

### Boxplots

Boxplot (genes)

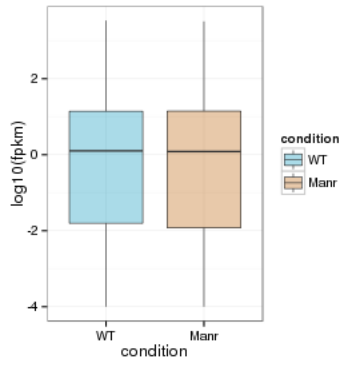

Boxplot (genes, replicates)

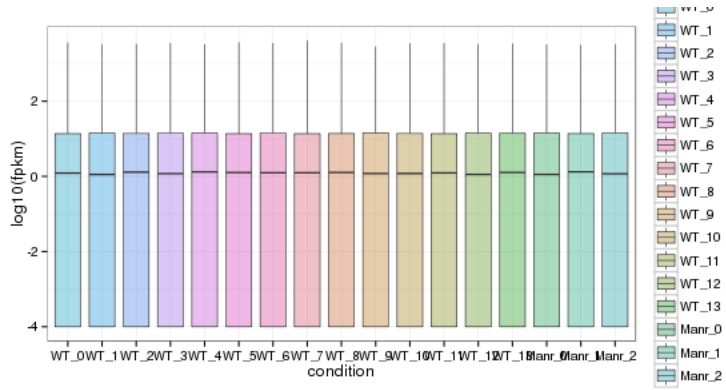

Boxplot (isoforms)

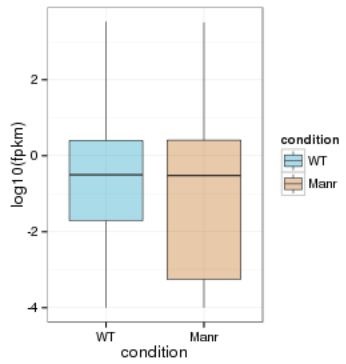

Boxplot (isoforms, replicates)

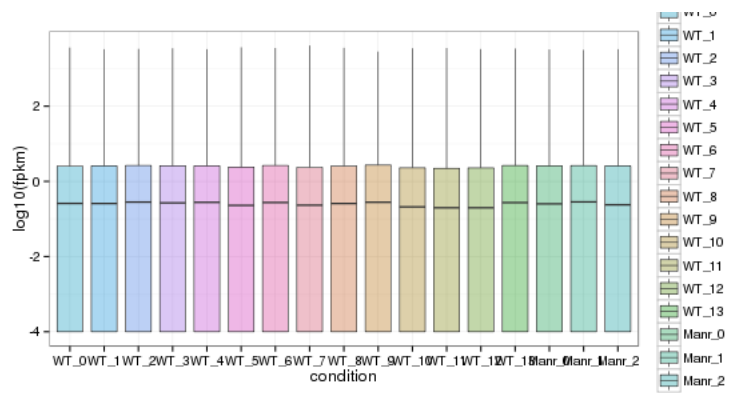

## Density

Density (genes)

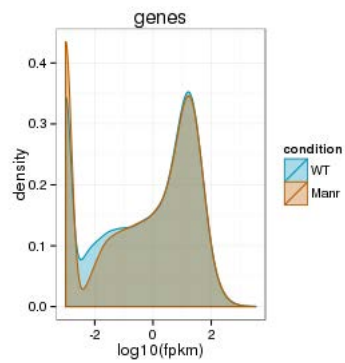

Density (genes, replicates)

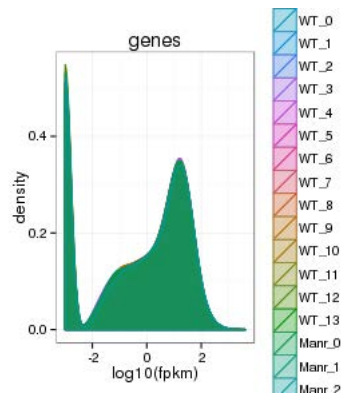

# Clustering

## Replicate Clusters

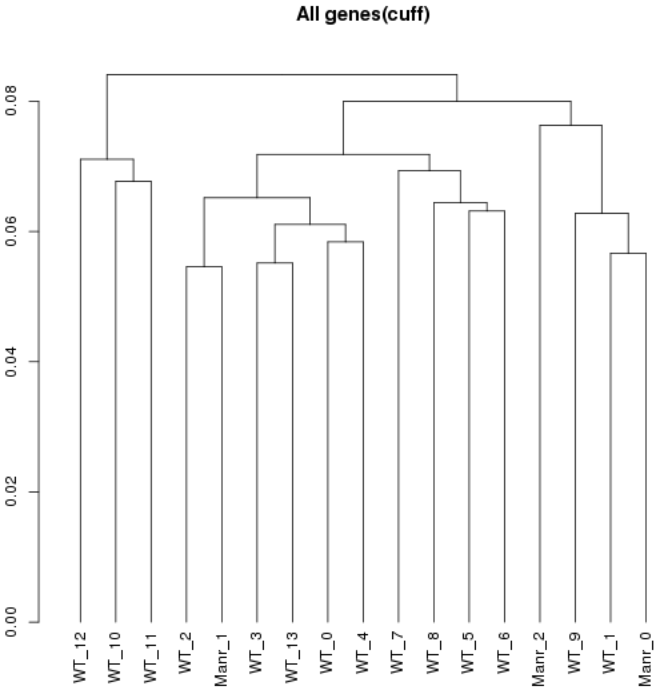

## NULL

## PCA (genes)

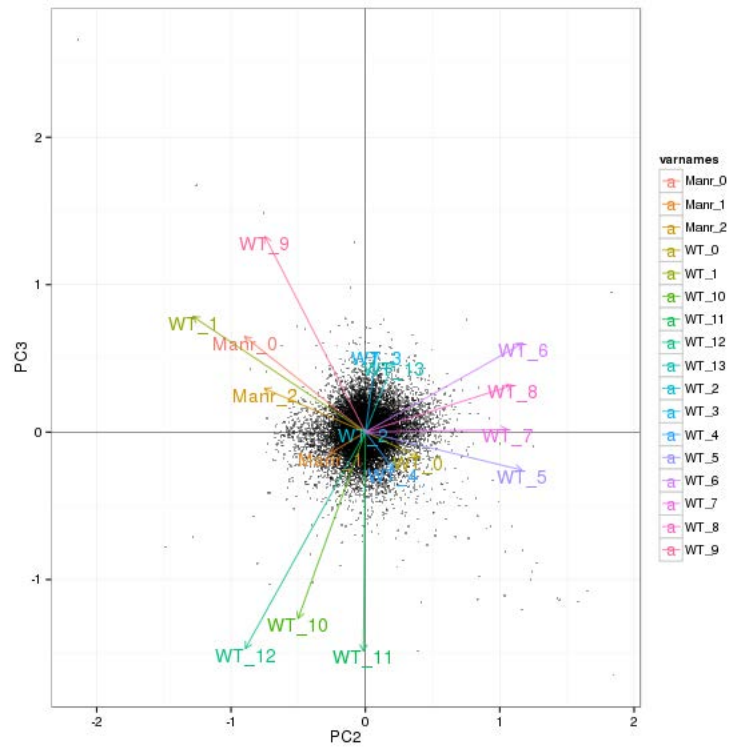

**MDS (genes)**



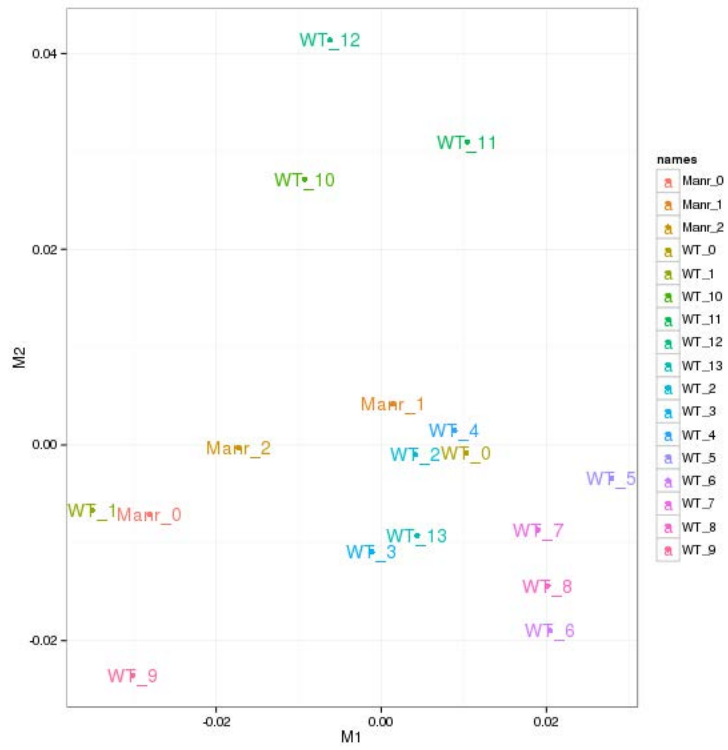

**KO assessment**  
**Endogenous lncRNA expression**

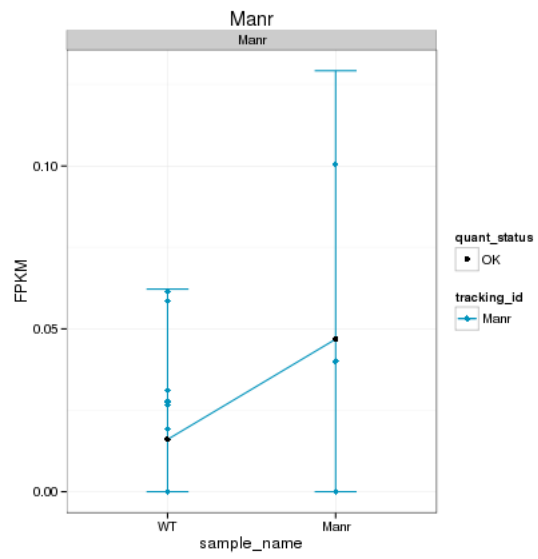

Endogenous expression of Manr isoforms:

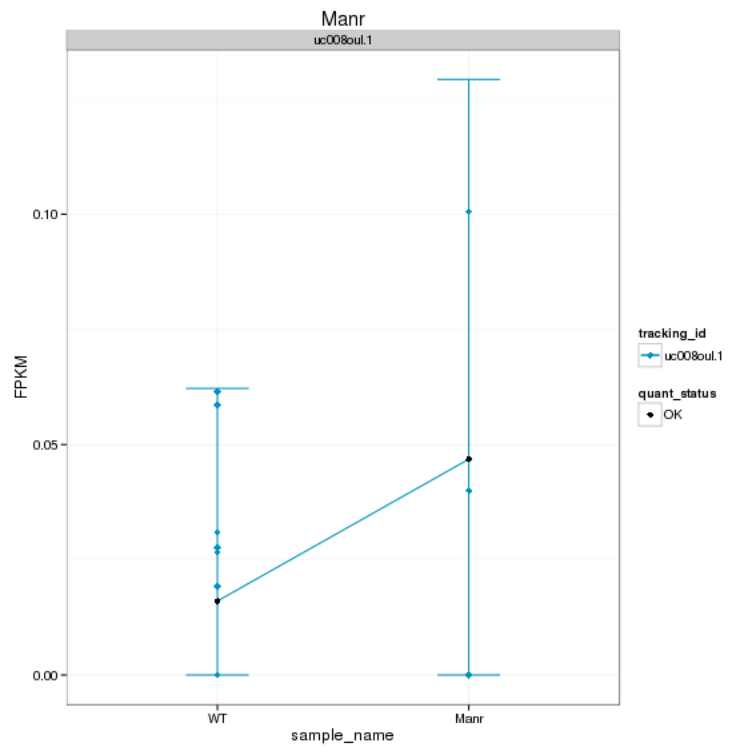

Barplot of gene expression:

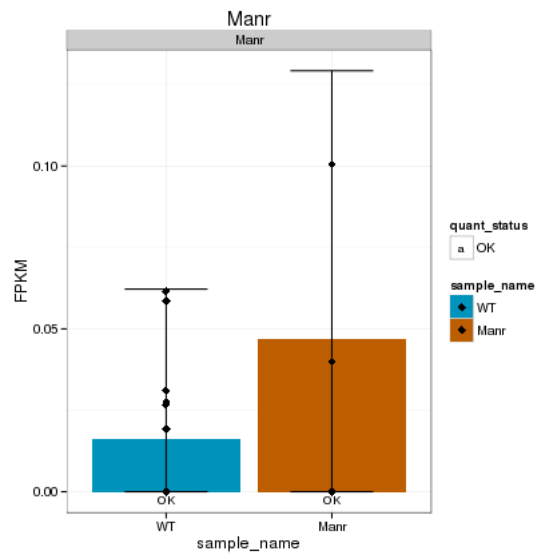

Barplot of isoform expression:

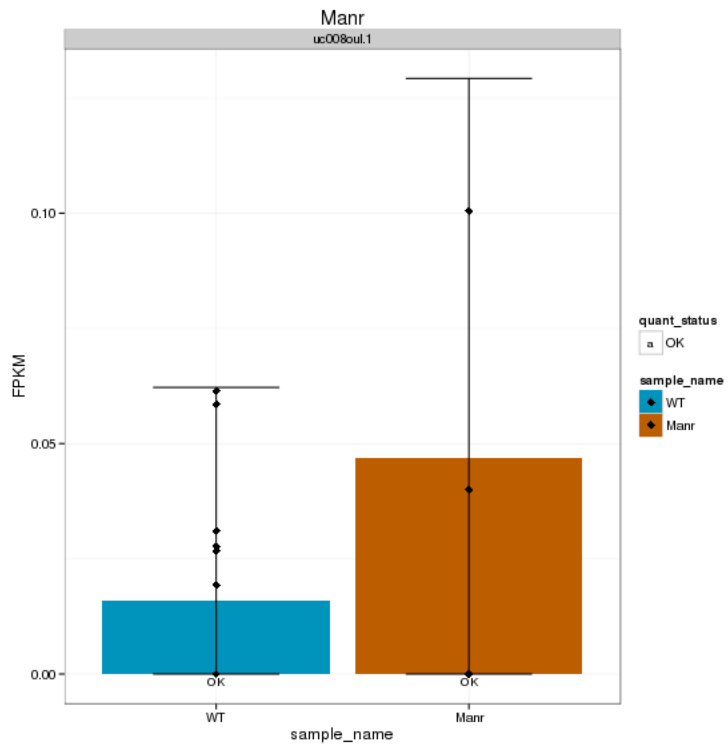

## LacZ expression

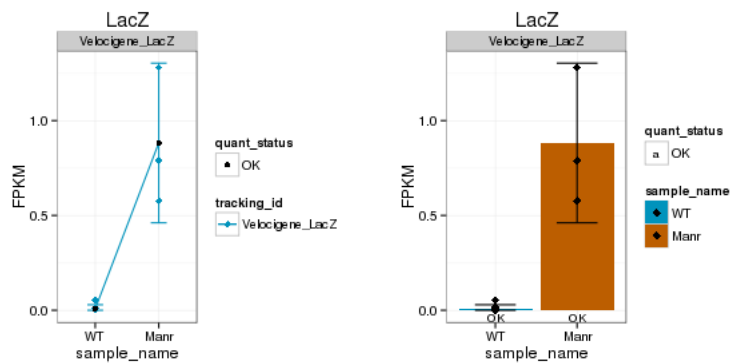

## Digital Genotyping (LacZ vs Endogenous lincRNA and Sex)

Eif2s3y is a y-expressed gene, Xist is an x-expressed gene Expression plot (endogenous linc, lacZ, Y-expressed gene):

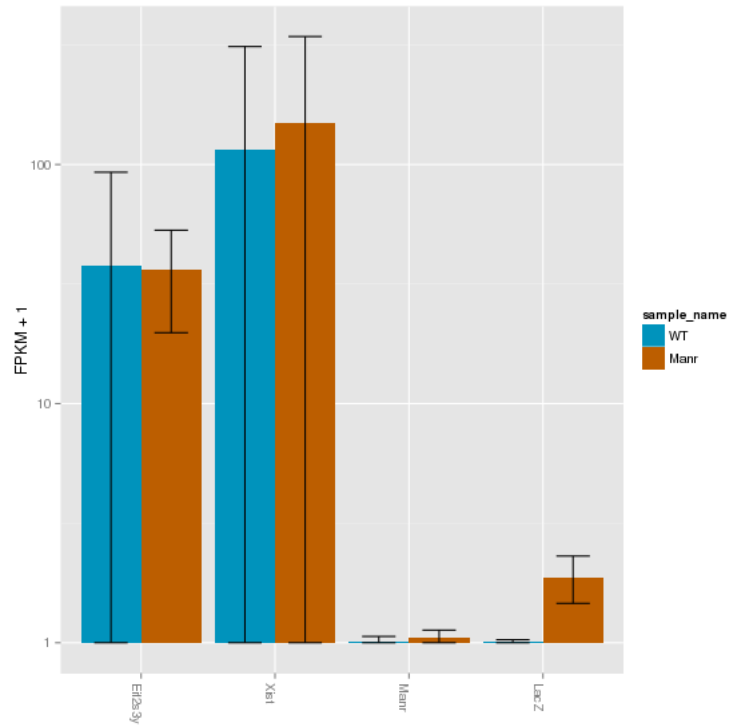

Expression heatmap:

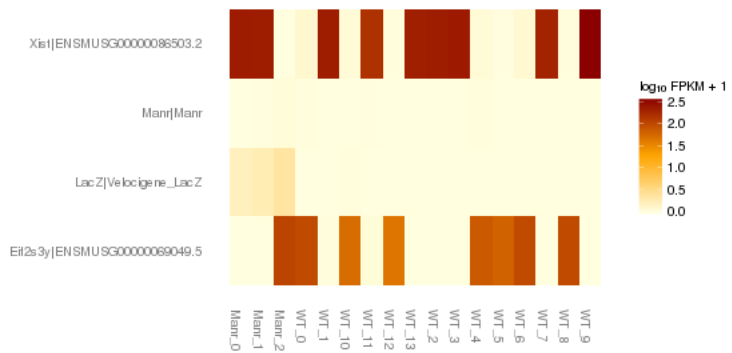

Track visualization

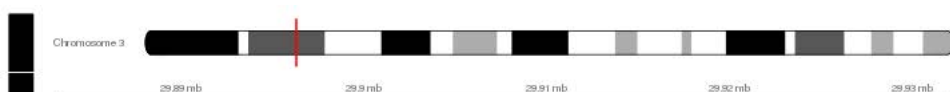

KO Region Manti\_2 Manti\_3 Manti\_0 Manti\_1 WT\_13 WT\_12 WT\_11 WT\_10 WT\_9 WT\_8 WT\_7 WT\_6 WT\_5 WT\_4 WT\_3 WT\_2 WT\_1 WT\_0 LncRNA Isoforms

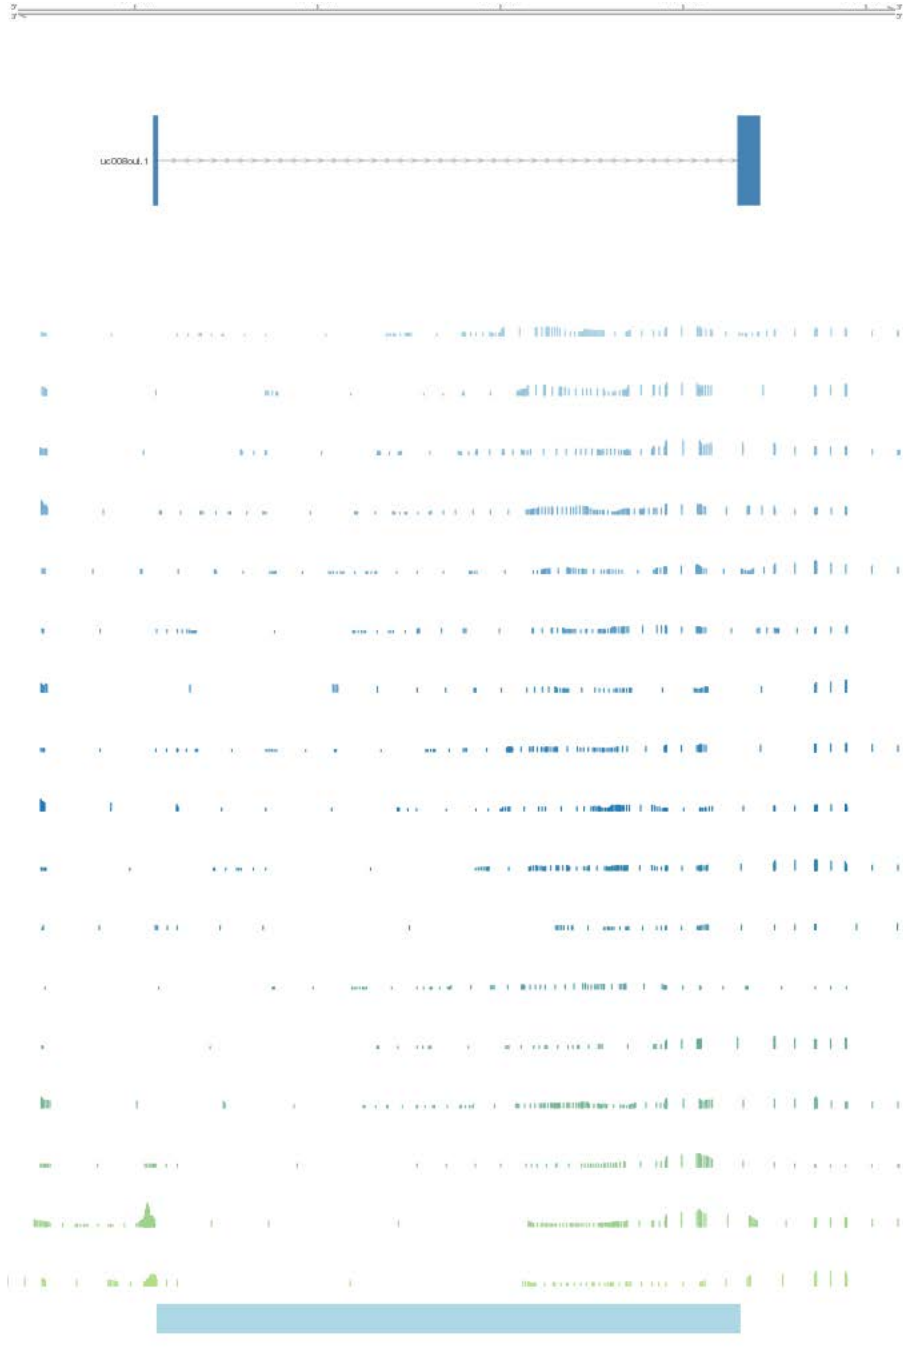

# Differential Analysis

## Differential Genes

There are 86 significantly differentially expressed genes. They are:

```
geneAnnot$gene_short_name
1 Gabra2
2 Col1a1
3 Nfix
4 Phyhip
5 Cacna1e
6 Mef2c
7 Fam131c
8 Ptgds
9 Hivep2
10 Eef1a2
11 Ascl1
12 Adcy1
13 Doc2b
14 Clu
15 Sla
16 Shisa9
17 Lynx1
18 Mal2
19 Gnal
20 Snca
21 Sphkap
22 Cybrd1
23 Fabp5
24 Slc7a11
25 Hmgcs2
26 Rps3a1
27 Nr4a3
28 Tnc
29 Tal2
30 Hpca
31 Ppp2r2c
32 Fosl2
33 Rph3a
34 Eln
35 Dync1i1
36 Slc6a11
37 Dbx1
```



38 Hddc3  
39 Mfge8  
40 Thy1  
41 Robo3  
42 Cspg5  
43 Ablim3  
  
44 Rims3  
45 Camkv  
46 Mgl1  
47 Arhgap27  
48 Sncb  
49 Mid1  
50 Nov  
51 Vgf  
52 Camk4  
53 Pcsk1n  
54 Grin3a  
55 Gabbr2  
56 Necab1  
57 Abcb1a  
58 Mpped1  
59 Bend6  
60 Hebp1  
61 Tuba1c  
62 Cnpy1  
63 Prkce  
64 Olig1  
65 Nxph3  
66 Mc4r  
67 Tmem72  
68 Grm5  
69 Slc6a7  
70 Gpr17  
  
71 Hbb-bs  
72 Aldh1a1  
73 AI854703  
74 6330403A02Rik  
75 Vsnl1  
76 Gabra5  
77 Adap1  
78 Hmga2  
79 Rps12  
80 Pcna-ps2

- 81 Rpl23
- 82 Wdfy1
- 83 Hbb-bt
- 84 A1593442
- 85 Hs3st4
- 86 AA465934

### Matrix of gene significant differences between conditions

(skip for Brainmap wt-v-ko comparisons)

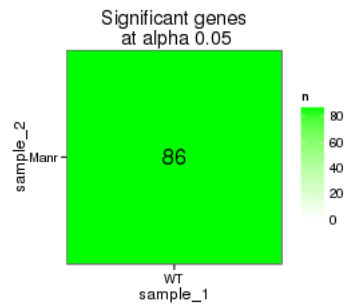

### Significant gene expression differences between conditions

Expression plot (genes):(turned off)

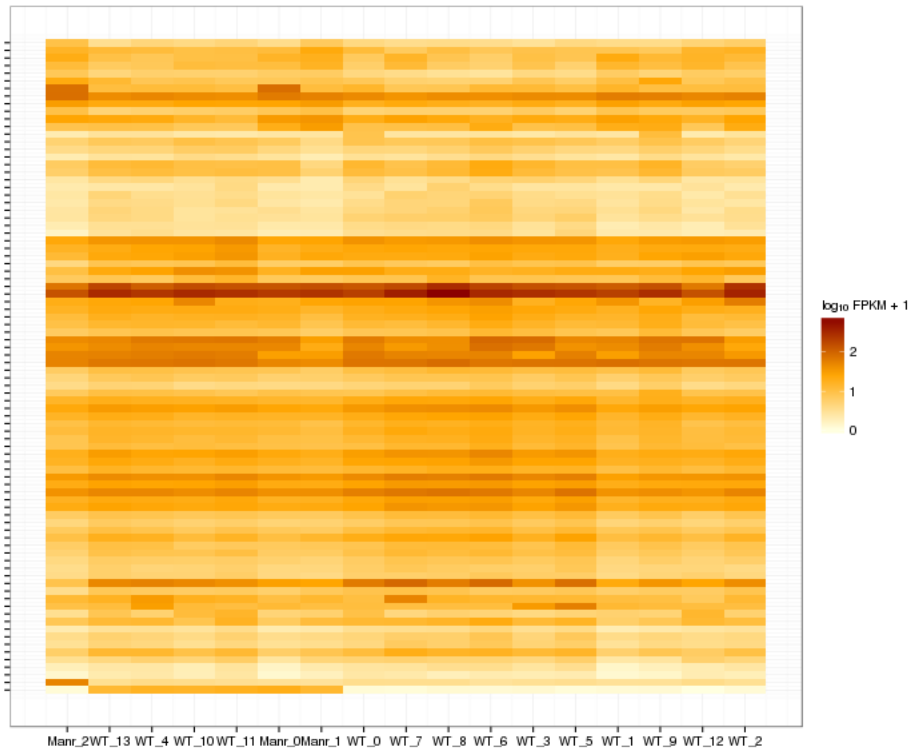

Significant genes with expression >50fpm (any condition):(turned off)

An individual look at each of the highly expressed significantly differentially regulated genes: (eval=false for first pass)

## Expression-level/significance relationship

Scatter plot of significant genes only:

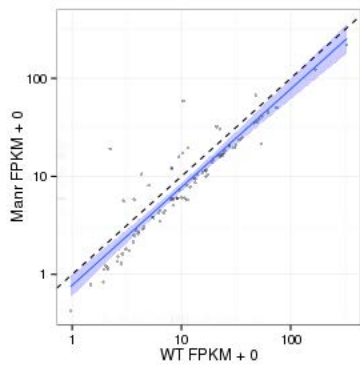

Volcano Plot

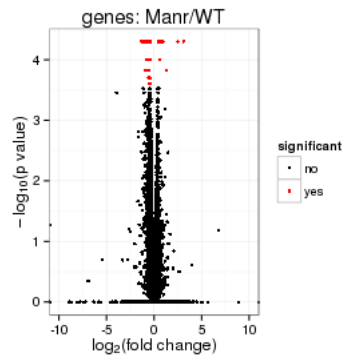

Volcano plot with significant genes only:

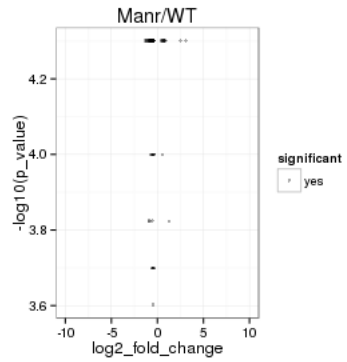

FoldChange Heatmap

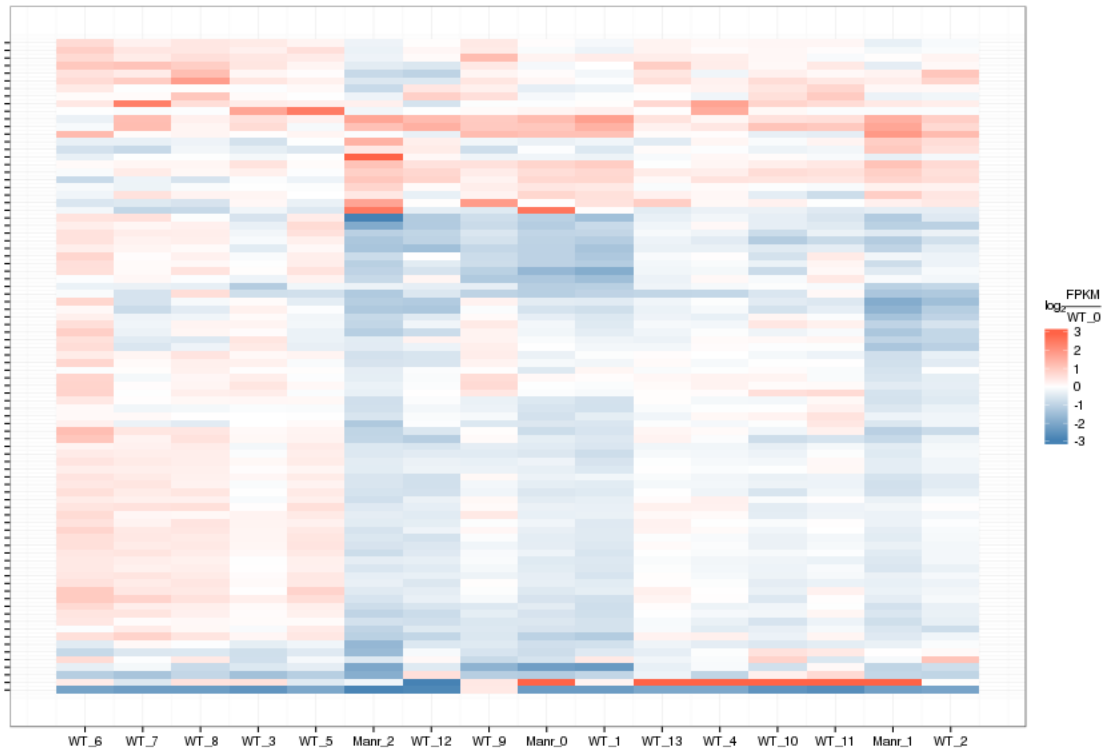

## Differential Splicing

### Differential Isoforms between conditions

Per isoform difference between conditions:

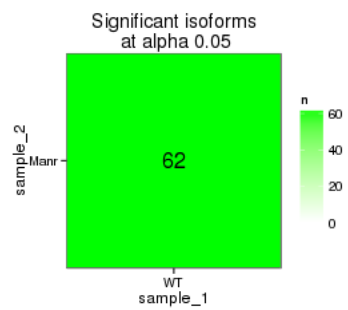

These isoforms are:

| isoAnnot | gene_short_name |
|----------|-----------------|
| 1        | Gabra2          |
| 2        | Col1a1          |
| 3        | Nfix            |
| 4        | Cacna1e         |
| 5        | Ndrg1           |
| 6        | Fam131c         |
| 7        | Ptgds           |
| 8        | Hivep2          |
| 9        | Eef1a2          |
| 10       | Kitl            |
| 11       | Ascl1           |
| 12       | Adcy1           |
| 13       | Doc2b           |
| 14       | Gng4            |
| 15       | Clu             |
| 16       | Sla             |
| 17       | Lynx1           |
| 18       | Mal2            |
| 19       | Fabp5           |
| 20       | Slc7a11         |
| 21       | Tnc             |
| 22       | Tal2            |
| 23       | Ppp2r2c         |
| 24       | Fosl2           |
| 25       | Ein             |
| 26       | Slc6a11         |
| 27       | Dbx1            |
| 28       | Hddc3           |
| 29       | Mfge8           |
| 30       | Thy1            |
| 31       | Cspg5           |
| 32       | Camkv           |
| 33       | Gas7            |
| 34       | Sncb            |
| 35       | Vgf             |
| 36       | Pcsk1n          |
| 37       | Gabbr2          |
| 38       | Necab1          |
| 39       | Mpped1          |
| 40       | Bend6           |

41 Reln  
42 Hebp1  
43 Prkce  
44 Hpcal4  
45 Olig1  
46 Nxph3  
47 Mc4r  
48 Tmem72  
49 Grm5  
50 Slc6a7  
51 Gpr17  
52 Aldh1a1  
53 AI854703  
54 6330403A02Rik  
55 Vsnl1  
56 Gabra5  
57 Slc4a4  
58 Opcml  
59 Pcna-ps2  
60 Hbb-bt  
61 AI593442  
62 Hs3st4

Gene-level DE isoform heatmap

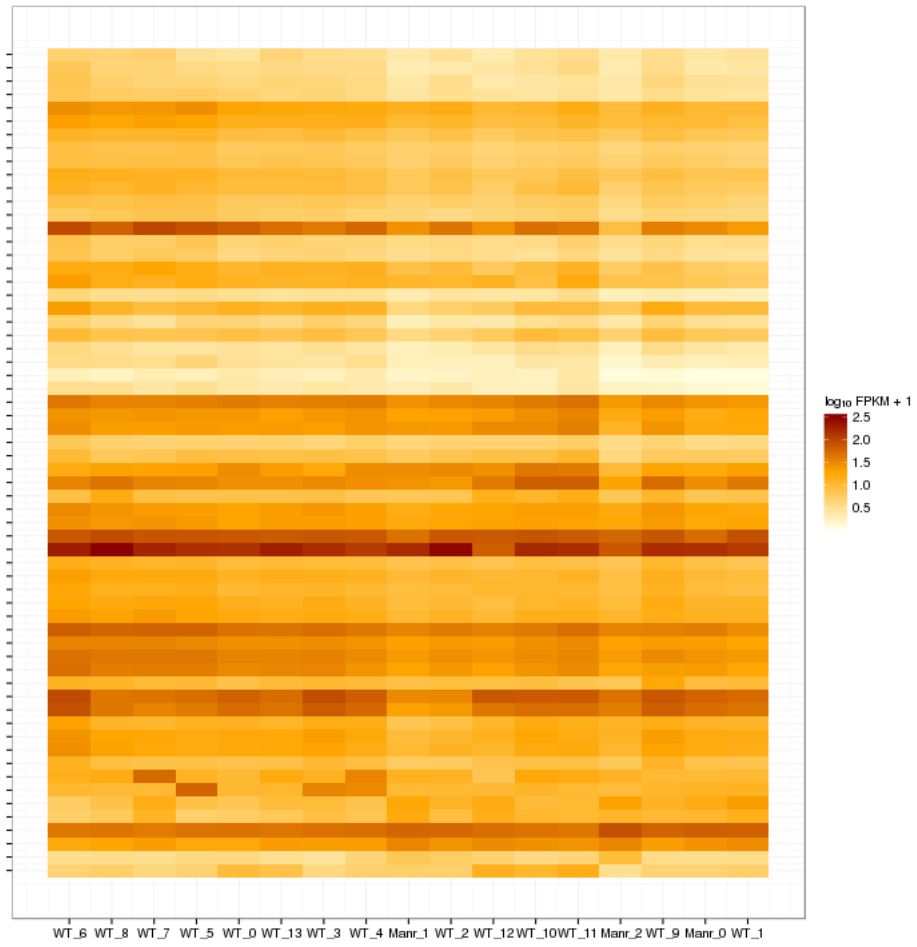

Isoform foldchange heatmap by isoform:



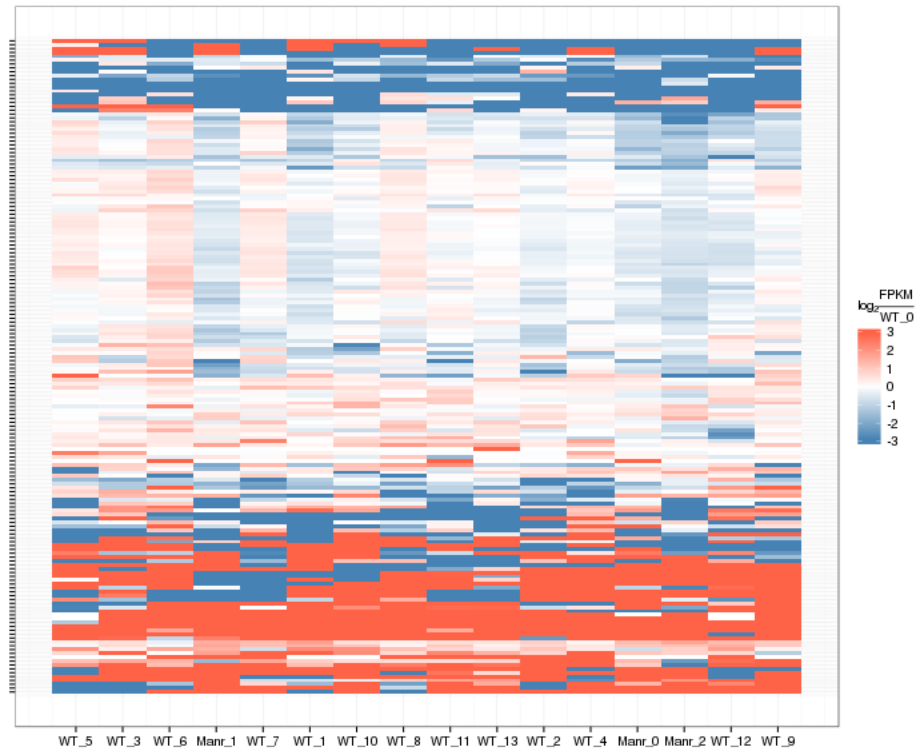

## Differential Splicing between conditions

(eval false for first pass)

Per condition differences in isoforms (Does gene have diff piechart between conditions?)

These genes are:

Splicing heatmap by isoform:

Splicing heatmap by gene

The following are significantly differentially spliced genes (relative portion of isoform per condition):

## Gene/Pathway Analysis

### GSEA

Enrichment and zscores are calculated based on expression in KO vs WT ( $\text{fpkmKO}/\text{fpkmWT}$ ), so genes that are down regulated in KO are shown in blue, while upregulation is shown in red.

KOWT Blue = down in KO Red = Up in KO

Biocarta enrichment:

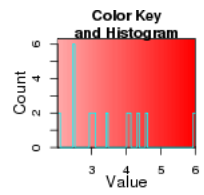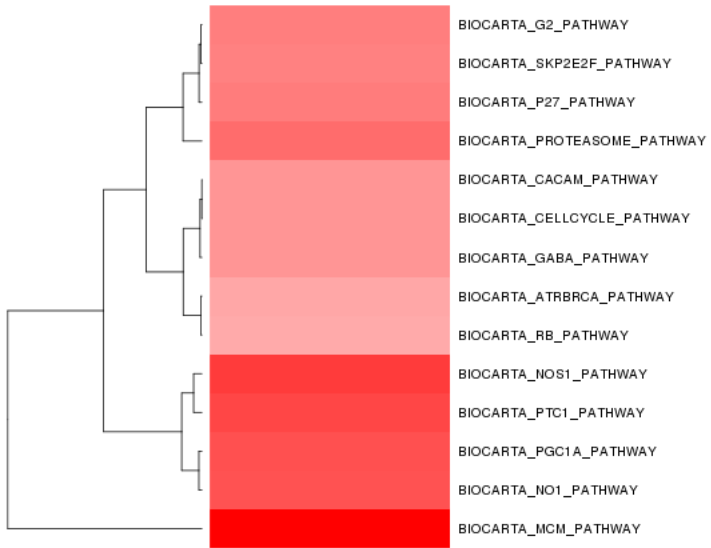

Biocarta zscore:

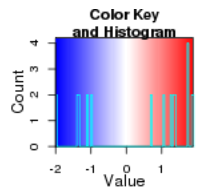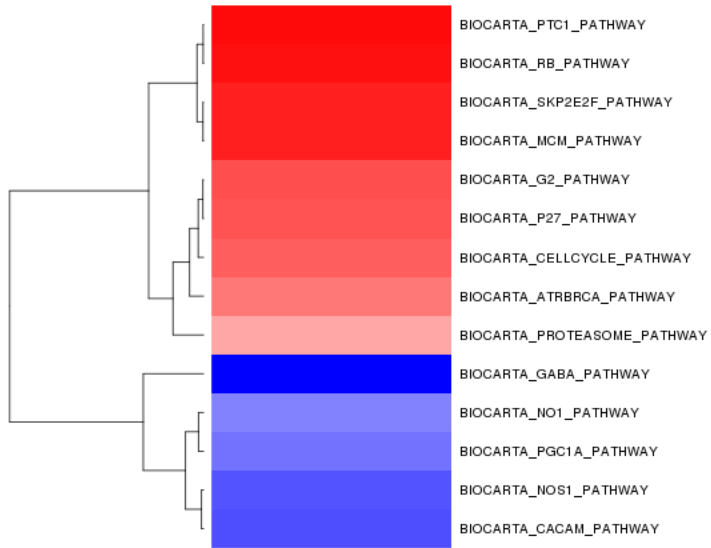

Reactome enrichment:

## Error: no locations are finite

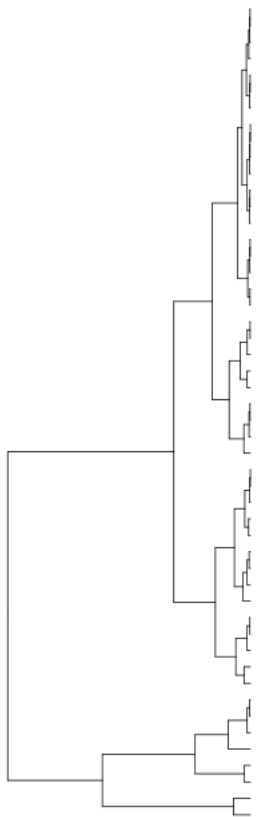

REACTOME\_NUCLEOTIDE\_EXCISION\_REPAIR  
REACTOME\_MITOTIC\_G2\_G2\_M\_PHASES  
REACTOME\_E2F\_MEDIATED\_REGULATION\_OF  
REACTOME\_ASSEMBLY\_OF\_THE\_PRE\_REPLIC  
REACTOME\_CLEAVAGE\_OF\_GROWING\_TRANS  
REACTOME\_RNA\_POL\_II\_PRE\_TRANSCRIPTIO  
REACTOME\_DNA\_STRAND\_ELONGATION  
REACTOME\_ORC1\_REMOVAL\_FROM\_CHROMA  
REACTOME\_PLATELET\_ACTIVATION\_SIGNALIN  
REACTOME\_POTASSIUM\_CHANNELS  
REACTOME\_GPCR\_LIGAND\_BINDING  
REACTOME\_TRANSCRIPTION\_COUPLED\_NER\_  
REACTOME\_METABOLISM\_OF\_NON\_CODING\_F  
REACTOME\_AXON\_GUIDANCE  
REACTOME\_MRNA\_3\_END\_PROCESSING  
REACTOME\_METABOLISM\_OF\_MRNA  
REACTOME\_REGULATION\_OF\_MITOTIC\_CELL\_  
REACTOME\_NEUROTRANSMITTER\_RECEPTOR  
REACTOME\_HEMOSTASIS  
REACTOME\_LATE\_PHASE\_OF\_HIV\_LIFE\_CYCLE  
REACTOME\_HIV\_INFECTION  
REACTOME\_M\_G1\_TRANSITION  
REACTOME\_G2\_M\_CHECKPOINTS  
REACTOME\_TRANSPORT\_OF\_MATURE\_TRANS  
REACTOME\_TRANSMEMBRANE\_TRANSPORT\_C  
REACTOME\_ACTIVATION\_OF\_ATR\_IN\_RESPON  
REACTOME\_CHROMOSOME\_MAINTENANCE  
REACTOME\_ACTIVATION\_OF\_THE\_PRE\_REPLI  
REACTOME\_GPCR\_DOWNSTREAM\_SIGNALING  
REACTOME\_METABOLISM\_OF\_RNA  
REACTOME\_HIV\_LIFE\_CYCLE  
REACTOME\_SYNTHESIS\_OF\_DNA  
REACTOME\_MITOTIC\_PROMETAPHASE  
REACTOME\_DNA\_REPAIR  
REACTOME\_TRANSMISSION\_ACROSS\_CHEMIC  
REACTOME\_SIGNALING\_BY\_GPCR  
REACTOME\_CELL\_CYCLE\_CHECKPOINTS  
REACTOME\_RNA\_POL\_II\_TRANSCRIPTION  
REACTOME\_G1\_S\_TRANSITION  
REACTOME\_S\_PHASE  
REACTOME\_MITOTIC\_G1\_G1\_S\_PHASES  
REACTOME\_TRANSCRIPTION  
REACTOME\_PROCESSING\_OF\_CAPPED\_INTRC  
REACTOME\_MRNA\_PROCESSING  
REACTOME\_MITOTIC\_M\_M\_G1\_PHASES  
REACTOME\_DNA\_REPLICATION  
REACTOME\_NEURONAL\_SYSTEM  
REACTOME\_MRNA\_SPLICING  
REACTOME\_CELL\_CYCLE  
REACTOME\_CELL\_CYCLE\_MITOTIC

Reactome zscore:

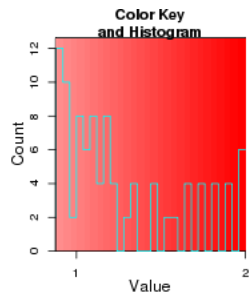

\_\_\_\_\_

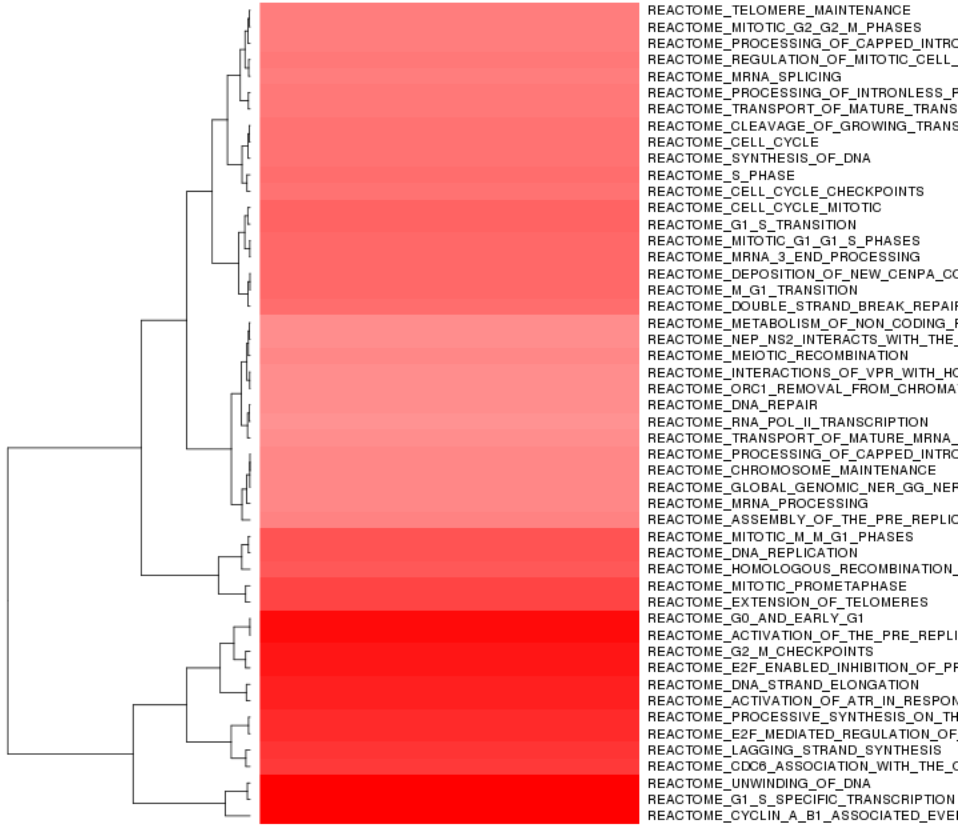

Kegg enrichment:

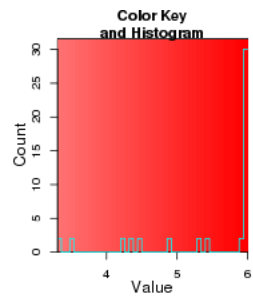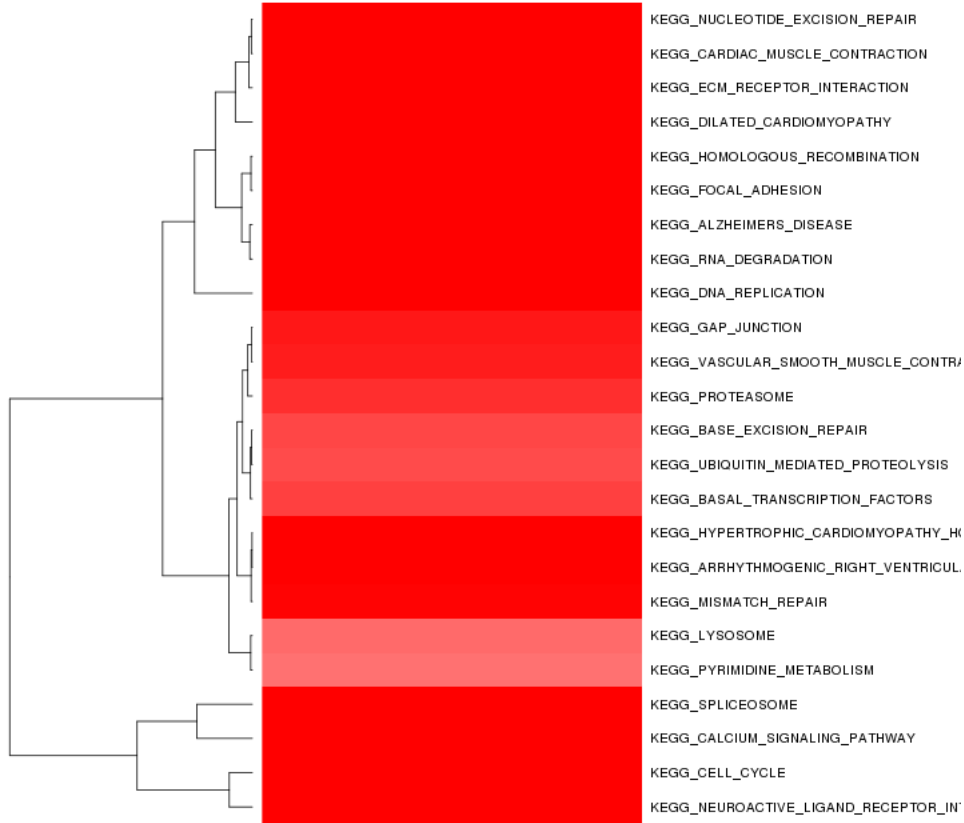

Kegg zscore:

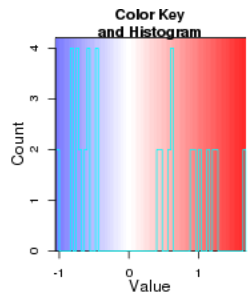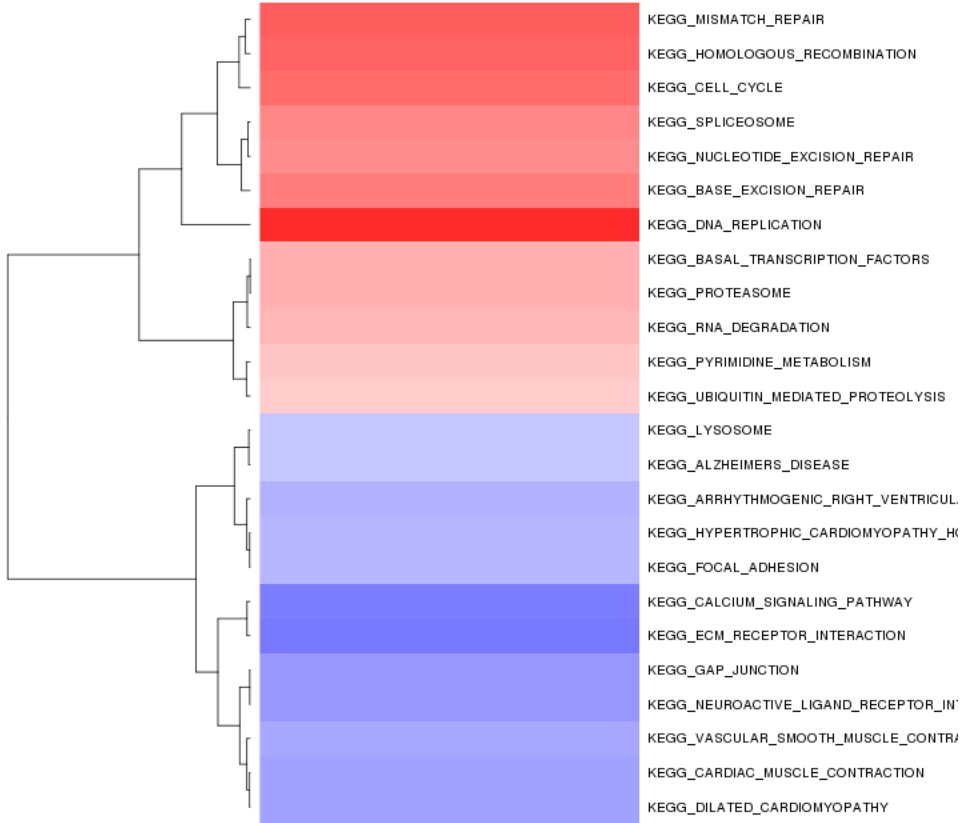

Interneuron enrichment:

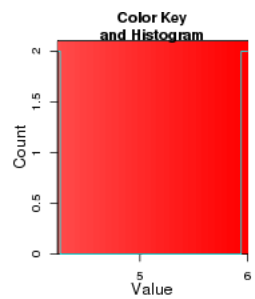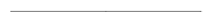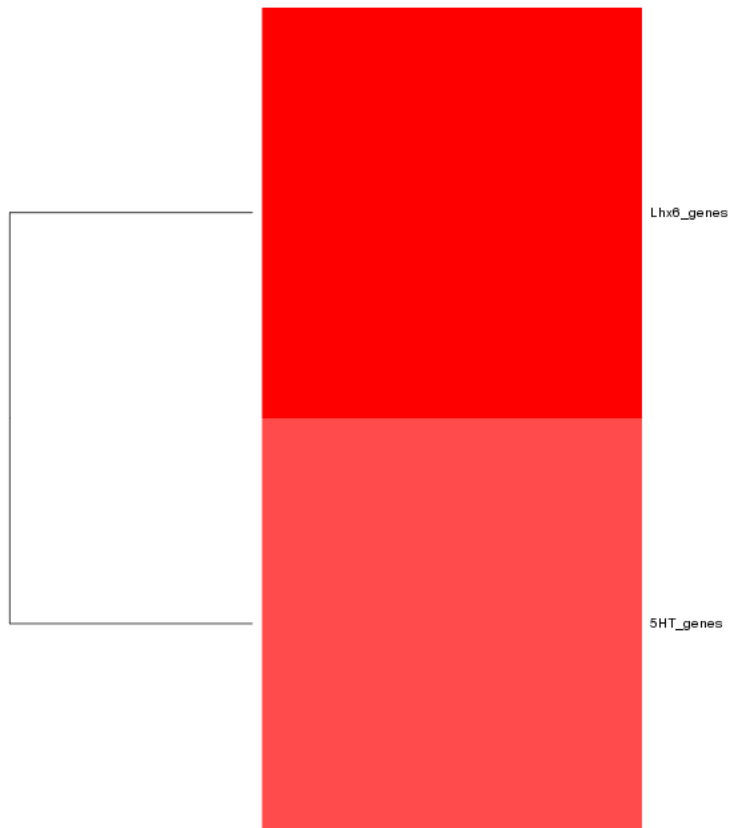

Interneuron zscore:



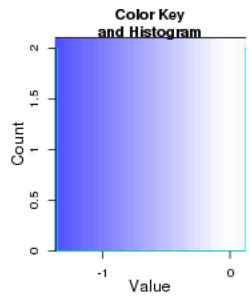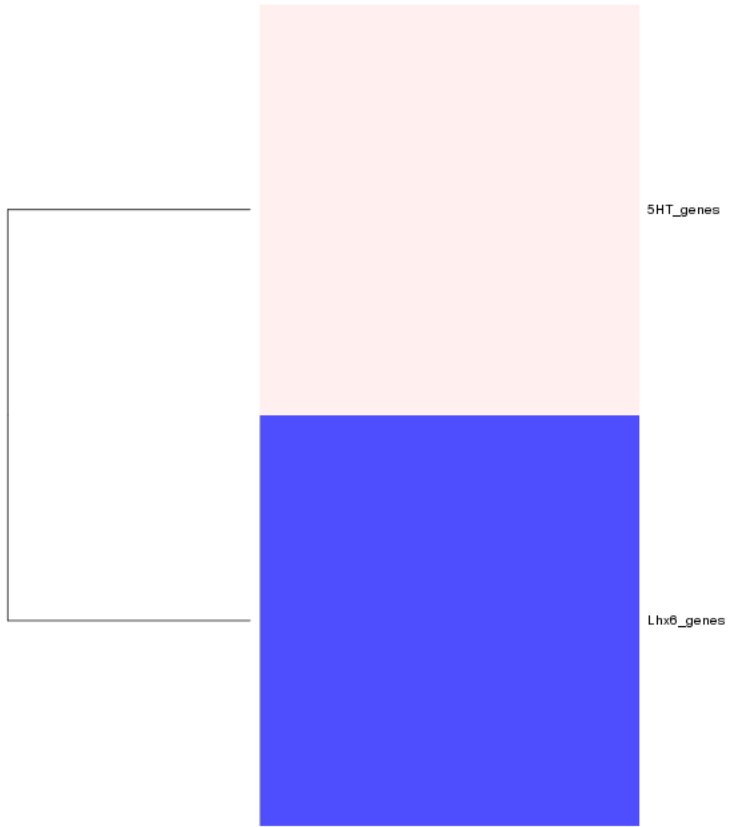

Oncogene enrichment:

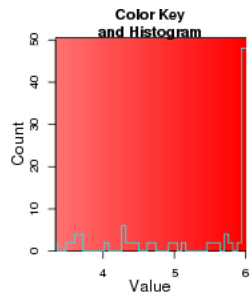

\_\_\_\_\_

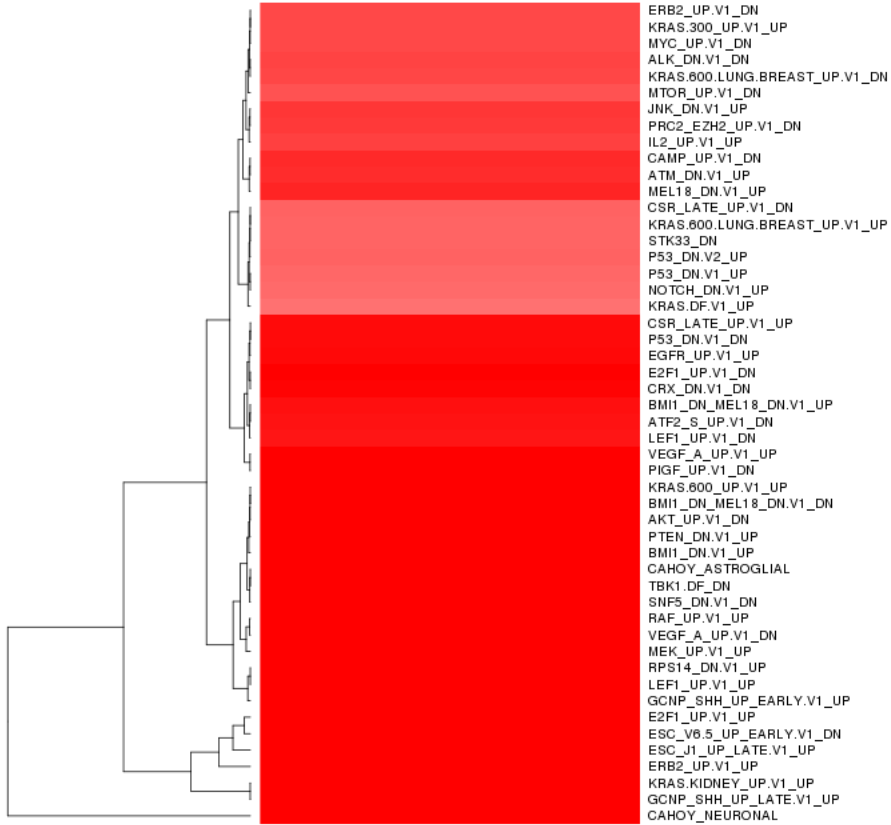

Oncogene zscore:

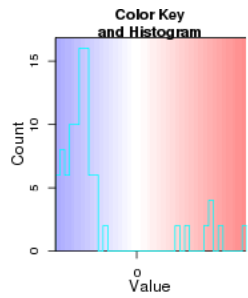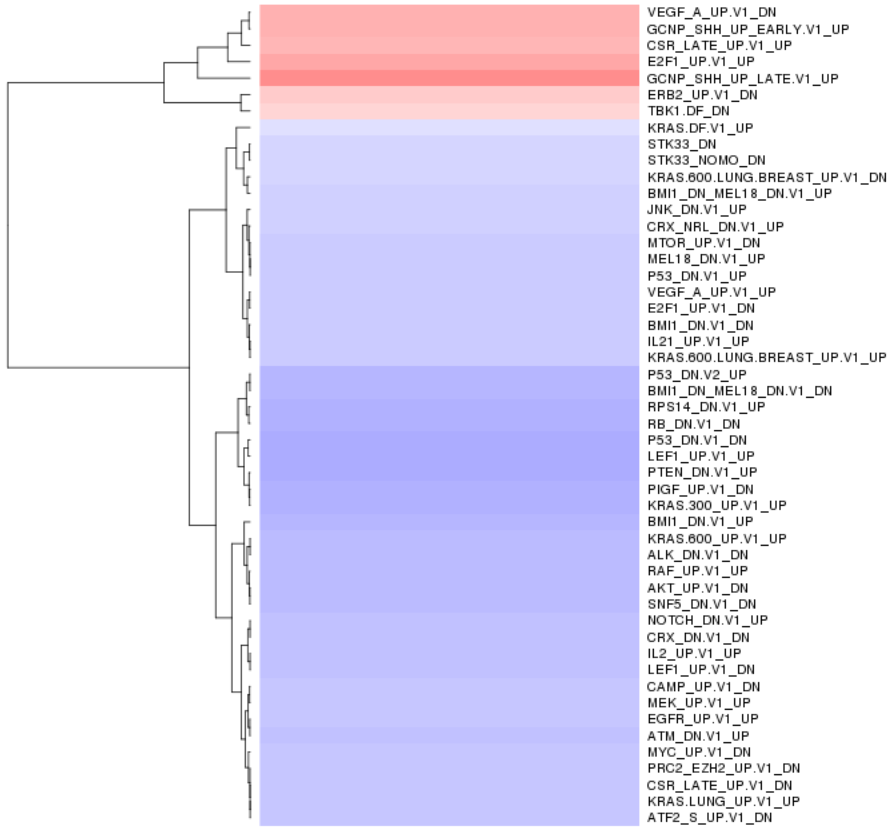

Immuno enrichment:

## Error: no locations are finite



\_\_\_\_\_

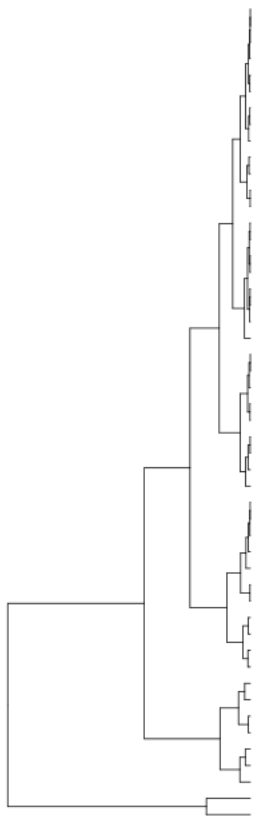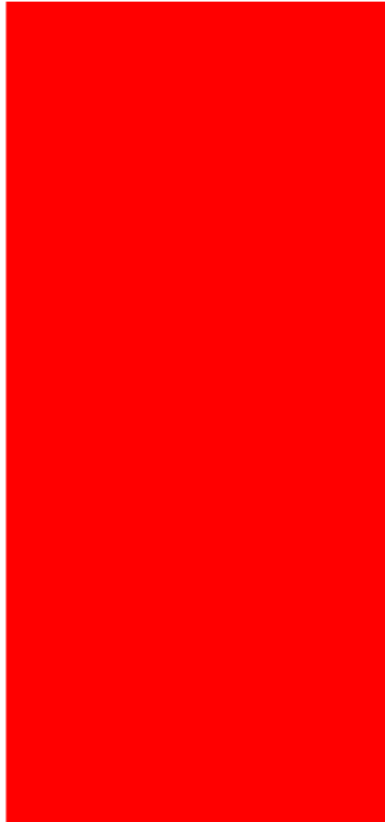

GSE30962\_PRIMARY\_VS\_SECONDARY\_CHRO  
GSE9050\_GP33\_VS\_GP276\_LCMV\_SPECIFIC\_I  
GSE15767\_MED\_VS\_SCS\_MAC\_LN\_UP  
GSE24634\_TEFF\_VS\_TCONV\_DAY3\_IN\_CULTU  
GSE10239\_MEMORY\_VS\_KLRG1HIGH\_EFF\_CD  
GSE12845\_IGD\_POS\_BLOOD\_VS\_PRE\_GC\_TO  
GSE19825\_CD24LOW\_VS\_IL2RA\_HIGH\_DAY3\_  
GSE31082\_DP\_VS\_CD4\_SP\_THYMOCYTE\_UP  
GSE27786\_LIN\_NEG\_VS\_MONO\_MAC\_UP  
GSE10325\_LUPUS\_BCELL\_VS\_LUPUS\_MYELO  
GSE22886\_NAIVE\_BCELL\_VS\_MONOCYTE\_DN  
GSE31082\_DN\_VS\_CD4\_SP\_THYMOCYTE\_UP  
GSE24634\_TEFF\_VS\_TCONV\_DAY10\_IN\_CULTI  
GSE15930\_NAIVE\_VS\_24H\_IN\_VITRO\_STIM\_IN  
GOLDRATH\_EFF\_VS\_MEMORY\_CD8\_TCELL\_UF  
GSE10325\_BCELL\_VS\_MYELOID\_DN  
GSE10325\_LUPUS\_CD4\_TCELL\_VS\_LUPUS\_M'  
GSE24026\_PD1\_LIGATION\_VS\_CTRL\_IN\_ACT\_  
GSE24634\_TREG\_VS\_TCONV\_POST\_DAY10\_IL  
GSE15930\_NAIVE\_VS\_24H\_IN\_VITRO\_STIM\_IL  
GSE15930\_NAIVE\_VS\_48H\_IN\_VITRO\_STIM\_IL  
GSE12366\_GC\_VS\_NAIVE\_BCELL\_UP  
GSE24634\_TREG\_VS\_TCONV\_POST\_DAY7\_IL4  
GSE15930\_NAIVE\_VS\_48H\_IN\_VITRO\_STIM\_IF  
GSE1480\_INTRATHYMIC\_T\_PROGENITOR\_VS\_  
GSE31082\_DP\_VS\_CD8\_SP\_THYMOCYTE\_UP  
GSE15930\_NAIVE\_VS\_24H\_IN\_VITRO\_STIM\_CI  
GSE10239\_NAIVE\_VS\_DAY4\_5\_EFF\_CD8\_TCEL  
GSE1480\_INTRATHYMIC\_T\_PROGENITOR\_VS\_  
GSE22886\_UNSTIM\_VS\_STIM\_MEMORY\_TCELL  
GSE10239\_MEMORY\_VS\_KLRG1INT\_EFF\_CD8  
GSE24634\_TREG\_VS\_TCONV\_POST\_DAY3\_IL4  
GSE24634\_TEFF\_VS\_TCONV\_DAY7\_IN\_CULTU  
GSE7460\_CD8\_TCELL\_VS\_TREG\_ACT\_DN  
GSE15930\_NAIVE\_VS\_48H\_IN\_VITRO\_STIM\_CI  
GSE36476\_CTRL\_VS\_TSST\_ACT\_72H\_MEMOR  
GSE39820\_CTRL\_VS\_TGFBETA3\_IL6\_IL23A\_CI  
GSE24634\_TREG\_VS\_TCONV\_POST\_DAYS\_IL4  
GSE10239\_MEMORY\_VS\_DAY4\_5\_EFF\_CD8\_TC  
GSE36476\_CTRL\_VS\_TSST\_ACT\_40H\_MEMOR  
GSE22886\_UNSTIM\_VS\_IL2\_STIM\_NKCELL\_DN  
GSE7764\_IL15\_TREATED\_VS\_CTRL\_NK\_CELL  
GSE36476\_CTRL\_VS\_TSST\_ACT\_40H\_MEMOR  
GSE14000\_TRANSLATED\_RNA\_VS\_MRNA\_4H\_  
GSE30962\_PRIMARY\_VS\_SECONDARY\_ACUTE  
GSE24634\_TEFF\_VS\_TCONV\_DAYS\_IN\_CULTU  
GSE22886\_UNSTIM\_VS\_IL15\_STIM\_NKCELL\_D  
GSE36476\_CTRL\_VS\_TSST\_ACT\_72H\_MEMOR  
GSE15750\_DAY6\_VS\_DAY10\_TRAFKO\_EFF\_C  
GSE15750\_DAY6\_VS\_DAY10\_EFF\_CD8\_TCELL

Immuno zscore:

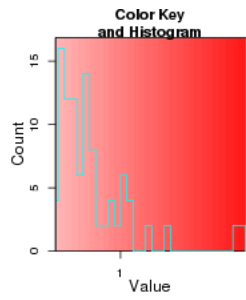

\_\_\_\_\_

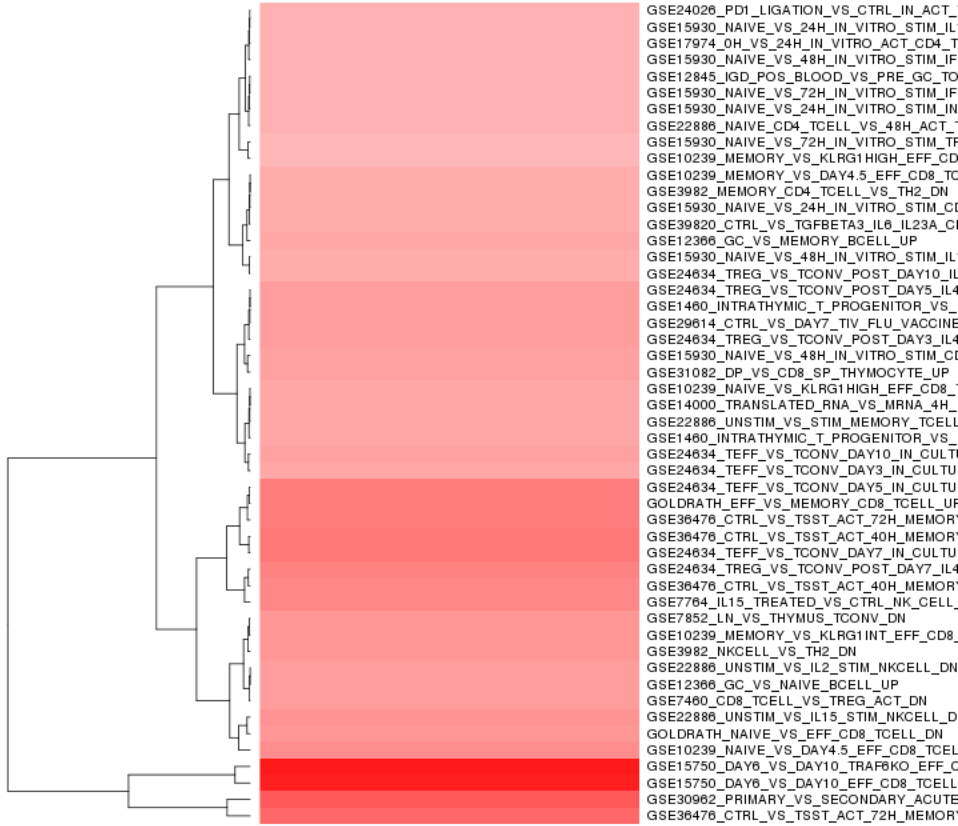

TF enrichment:

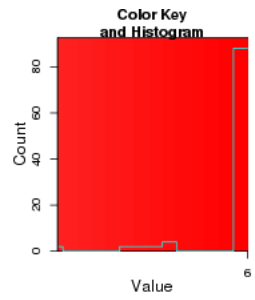

\_\_\_\_\_

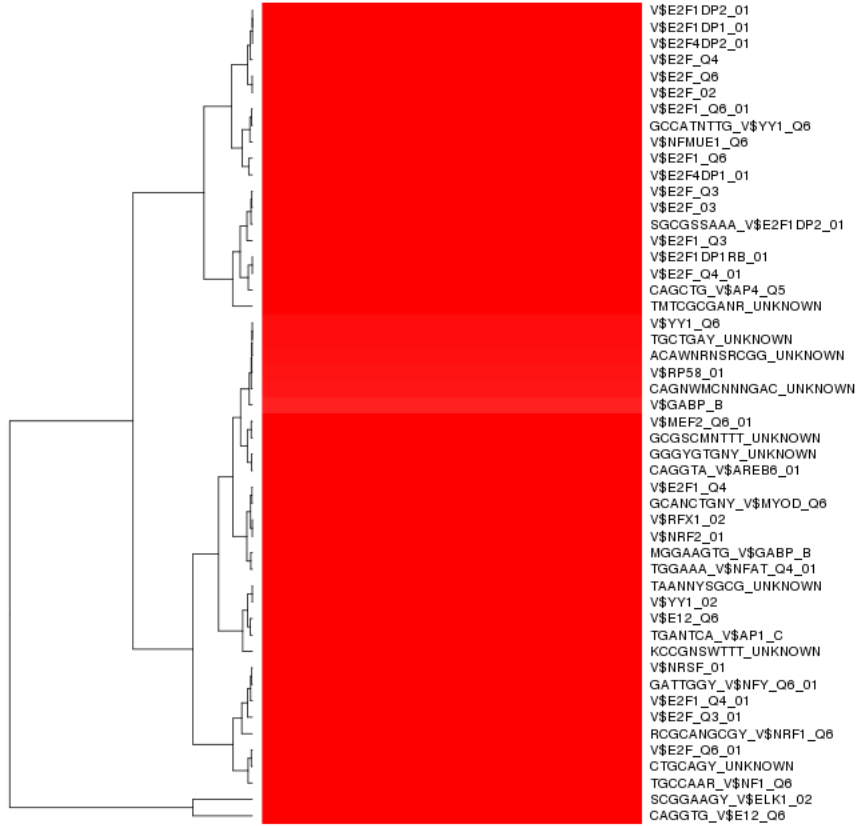

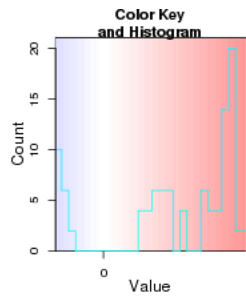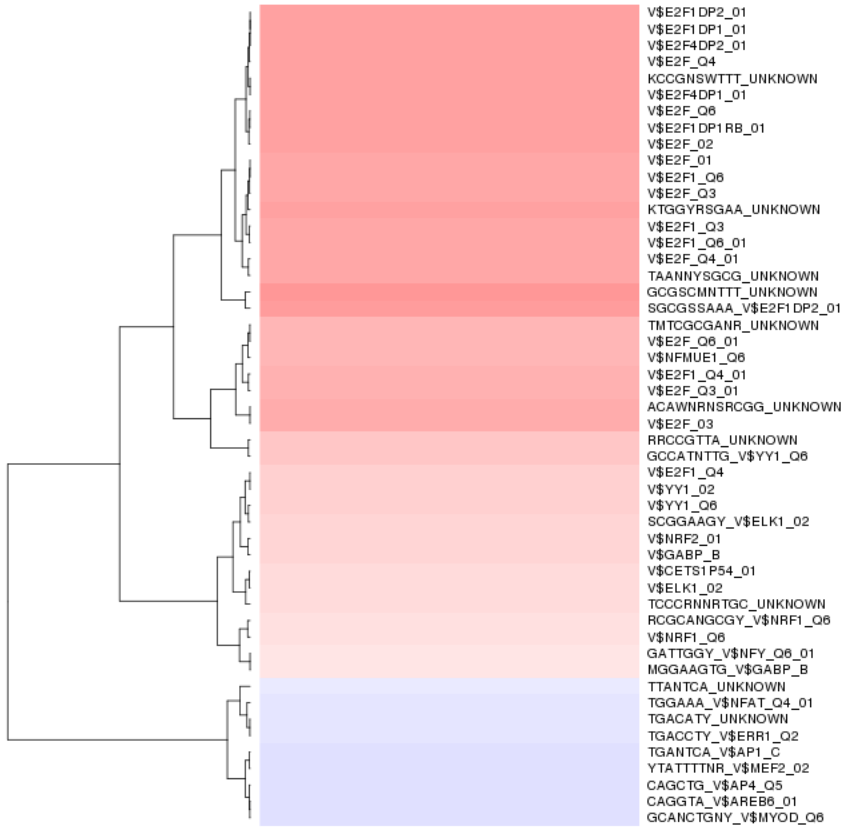

## GO enrichment

Cluster profiler used to call enrichments of significantly differentially regulated genes that map to Entrez IDs.

```
## [1] "ERROR: The estimated pi0 <= 0. Check that you have valid p-values or use another lambda method."
```

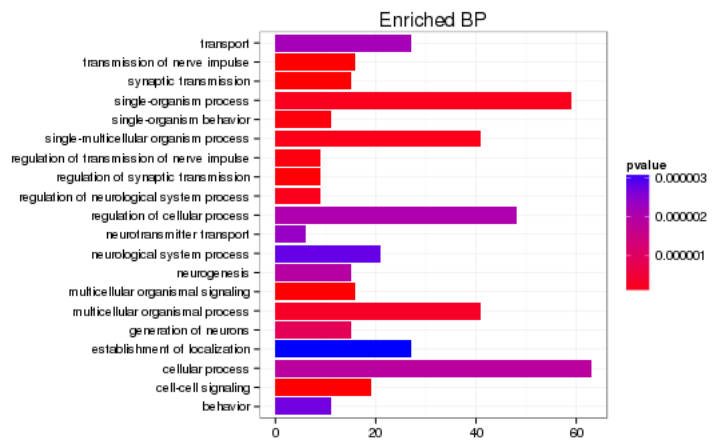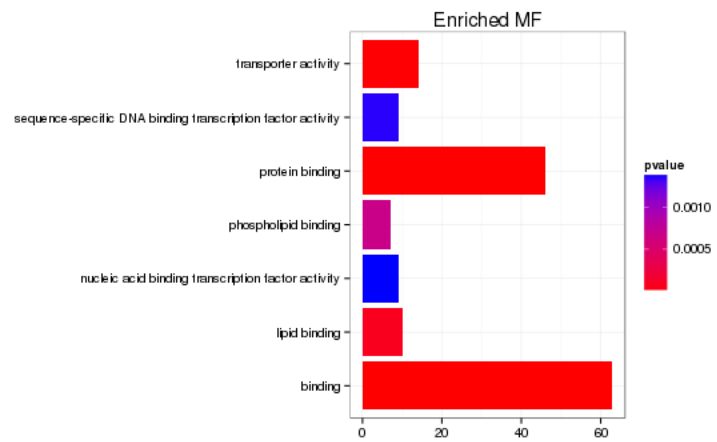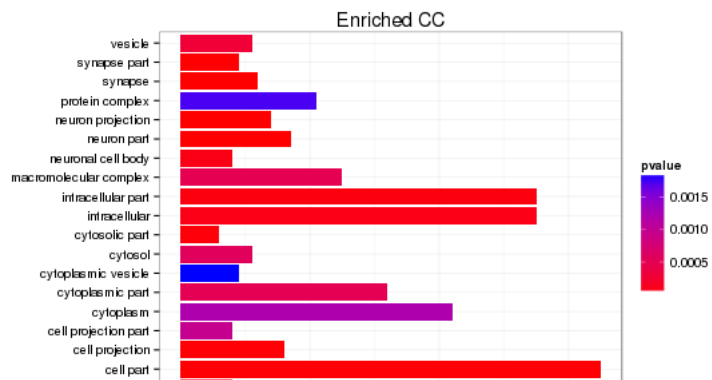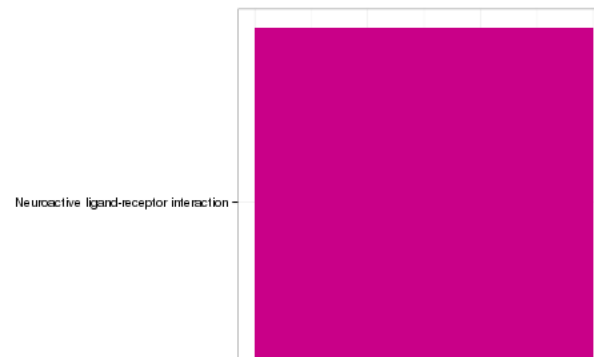



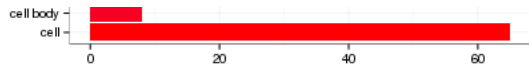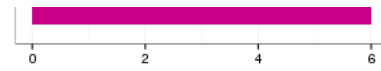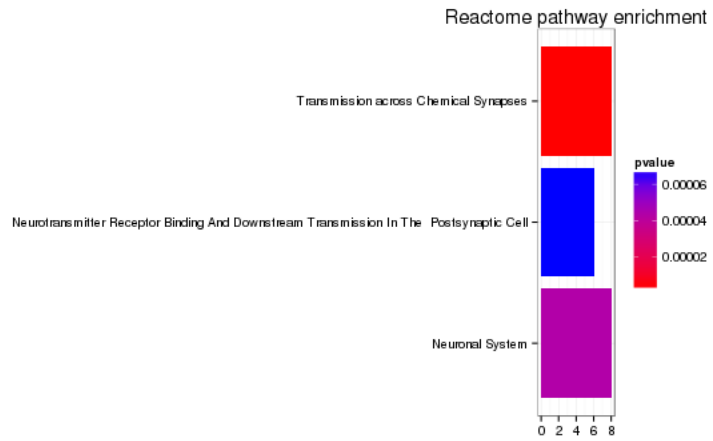

**Enrichment or depletion for stage-specific cell cycle markers**



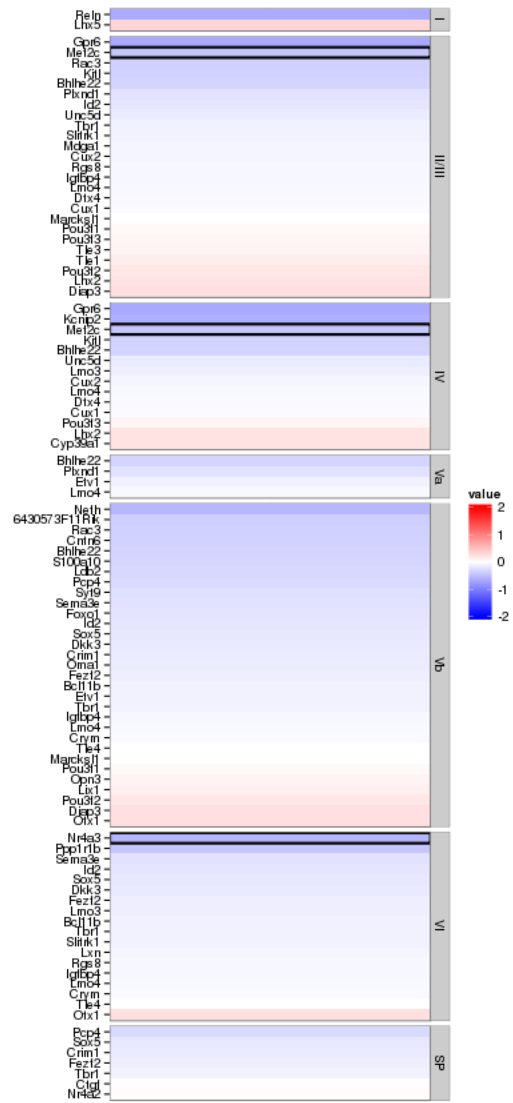

Enrichment or depletion for specific neural cell types

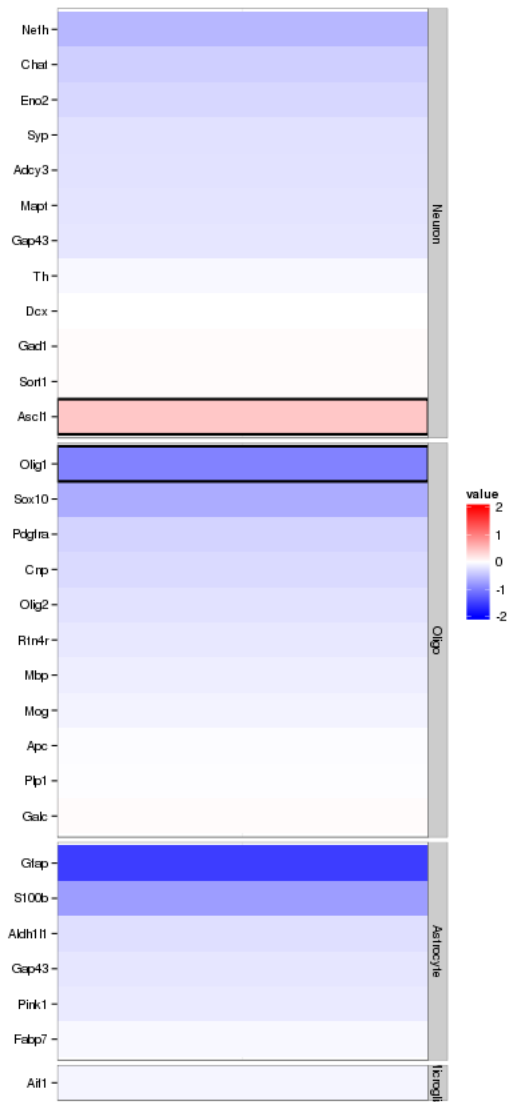

**Enrichment or Depletion of neural differentiation markers**

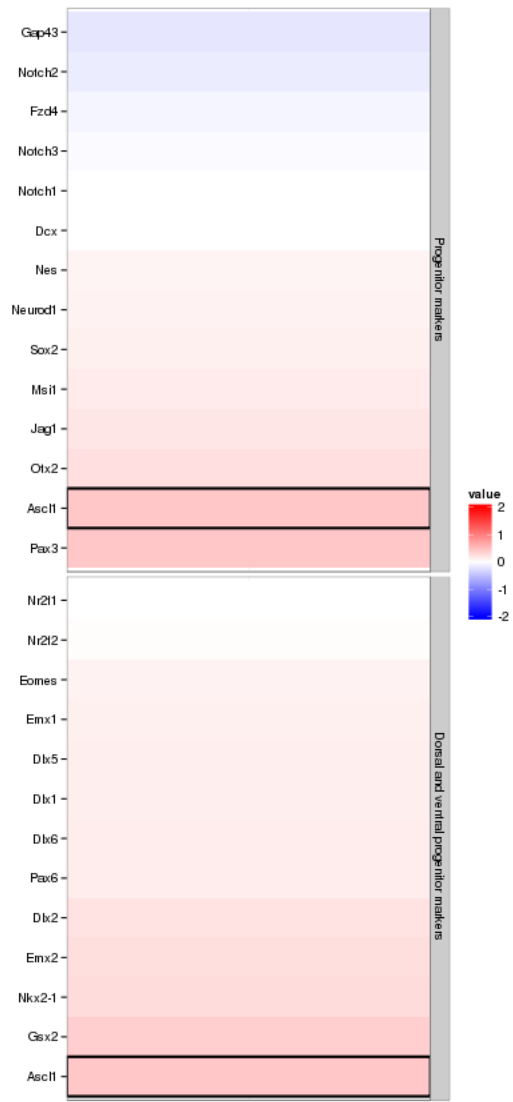

## Cis vs Trans (locally)

$\log_2$  Foldchange and test statistic are calculated with the ratio of  $\text{fpkm(KO)}/\text{fpkm(WT)}$ , thus the  $\text{test\_stat}$  is positive if a gene is higher in the KO and negative if a gene has lower expression in the KO

The pvalue for 0 genes significantly regulated in a region this size is: 1

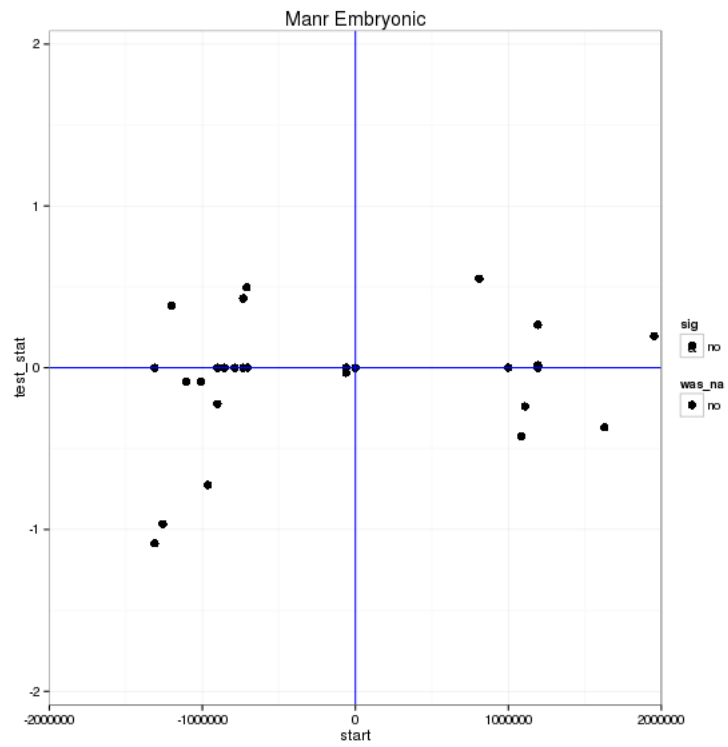

## Notes

Samples used are:

10

- 1 JR753
- 2 JR750
- 3 JR771
- 4 JR755
- 5 JR811
- 6 JR768
- 7 JR761
- 8 JR815
- 9 JR789
- 10 JR748
- 11 JR716
- 12 JR717
- 13 JR719
- 14 JR756

15 JR751  
16 JR772  
17 JR788

## Replicates

| file                                                                               | sample_name | replicate | rep_name | total_mass  | norm_mass   | internal_scale | external_scale |
|------------------------------------------------------------------------------------|-------------|-----------|----------|-------------|-------------|----------------|----------------|
| 1 /n/rinn_data1/seq/Igoff/Projects/BrainMap/data/quants/JR753/abundances.cxb WT    | 0           | WT_0      |          | 39331900.00 | 31913100.00 | 1.28           | 1.00           |
| 2 /n/rinn_data1/seq/Igoff/Projects/BrainMap/data/quants/JR750/abundances.cxb WT    | 1           | WT_1      |          | 36031100.00 | 31913100.00 | 1.11           | 1.00           |
| 3 /n/rinn_data1/seq/Igoff/Projects/BrainMap/data/quants/JR771/abundances.cxb WT    | 2           | WT_2      |          | 38857100.00 | 31913100.00 | 1.24           | 1.00           |
| 4 /n/rinn_data1/seq/Igoff/Projects/BrainMap/data/quants/JR755/abundances.cxb WT    | 3           | WT_3      |          | 41811300.00 | 31913100.00 | 1.30           | 1.00           |
| 5 /n/rinn_data1/seq/Igoff/Projects/BrainMap/data/quants/JR811/abundances.cxb WT    | 4           | WT_4      |          | 38172800.00 | 31913100.00 | 1.21           | 1.00           |
| 6 /n/rinn_data1/seq/Igoff/Projects/BrainMap/data/quants/JR768/abundances.cxb WT    | 5           | WT_5      |          | 28375200.00 | 31913100.00 | 0.90           | 1.00           |
| 7 /n/rinn_data1/seq/Igoff/Projects/BrainMap/data/quants/JR761/abundances.cxb WT    | 6           | WT_6      |          | 31706200.00 | 31913100.00 | 0.98           | 1.00           |
| 8 /n/rinn_data1/seq/Igoff/Projects/BrainMap/data/quants/JR815/abundances.cxb WT    | 7           | WT_7      |          | 29733100.00 | 31913100.00 | 0.93           | 1.00           |
| 9 /n/rinn_data1/seq/Igoff/Projects/BrainMap/data/quants/JR789/abundances.cxb WT    | 8           | WT_8      |          | 27681500.00 | 31913100.00 | 0.87           | 1.00           |
| 10 /n/rinn_data1/seq/Igoff/Projects/BrainMap/data/quants/JR748/abundances.cxb WT   | 9           | WT_9      |          | 32367000.00 | 31913100.00 | 0.97           | 1.00           |
| 11 /n/rinn_data1/seq/Igoff/Projects/BrainMap/data/quants/JR716/abundances.cxb WT   | 10          | WT_10     |          | 26144700.00 | 31913100.00 | 0.82           | 1.00           |
| 12 /n/rinn_data1/seq/Igoff/Projects/BrainMap/data/quants/JR717/abundances.cxb WT   | 11          | WT_11     |          | 25565400.00 | 31913100.00 | 0.81           | 1.00           |
| 13 /n/rinn_data1/seq/Igoff/Projects/BrainMap/data/quants/JR719/abundances.cxb WT   | 12          | WT_12     |          | 22697800.00 | 31913100.00 | 0.69           | 1.00           |
| 14 /n/rinn_data1/seq/Igoff/Projects/BrainMap/data/quants/JR756/abundances.cxb WT   | 13          | WT_13     |          | 38948900.00 | 31913100.00 | 1.23           | 1.00           |
| 15 /n/rinn_data1/seq/Igoff/Projects/BrainMap/data/quants/JR751/abundances.cxb Manr | 0           | Manr_0    |          | 33259800.00 | 31913100.00 | 1.03           | 1.00           |
| 16 /n/rinn_data1/seq/Igoff/Projects/BrainMap/data/quants/JR772/abundances.cxb Manr | 1           | Manr_1    |          | 39063700.00 | 31913100.00 | 1.25           | 1.00           |
| 17 /n/rinn_data1/seq/Igoff/Projects/BrainMap/data/quants/JR788/abundances.cxb Manr | 2           | Manr_2    |          | 23795600.00 | 31913100.00 | 0.74           | 1.00           |

## Session Info

```
## R version 3.0.2 (2013-09-25)
## Platform: x86_64-unknown-linux-gnu (64-bit)
##
## locale:
## [1] LC_CTYPE=en_US.UTF-8      LC_NUMERIC=C
## [3] LC_TIME=en_US.UTF-8      LC_COLLATE=en_US.UTF-8
## [5] LC_MONETARY=en_US.UTF-8  LC_MESSAGES=en_US.UTF-8
## [7] LC_PAPER=en_US.UTF-8     LC_NAME=C
## [9] LC_ADDRESS=C             LC_TELEPHONE=C
## [11] LC_MEASUREMENT=en_US.UTF-8 LC_IDENTIFICATION=C
##
## attached base packages:
## [1] grid      parallel  methods  stats    graphics grDevices utils
## [8] datasets base
##
## other attached packages:
## [1] plyr_1.8.1
## [2] stringr_0.6.2
## [3] seqbias_1.10.0
```

```

## [4] BSgenome.Mmusculus.UCSC.mm10_1.3.19
## [5] BSgenome_1.30.0
## [6] Biostrings_2.30.1
## [7] gdata_2.13.3
## [8] GO.db_2.10.1
## [9] org.Mm.eg.db_2.10.1
## [10] clusterProfiler_1.13.1
## [11] DOSE_2.0.0
## [12] ReactomePA_1.6.1
## [13] AnnotationDbi_1.24.0
## [14] Biobase_2.22.0
## [15] mgcv_1.7-29
## [16] nlme_3.1-117
## [17] RMySQL_0.9-3
## [18] RColorBrewer_1.0-5
## [19] gridExtra_0.9.1
## [20] gtable_0.1.2
## [21] marray_1.40.0
## [22] gplots_2.13.0
## [23] GSA_1.03
## [24] limma_3.18.13
## [25] xtable_1.7-3
## [26] cummeRbund_2.7.2
## [27] Gviz_1.6.0
## [28] rtracklayer_1.22.7
## [29] GenomicRanges_1.14.4
## [30] XVector_0.2.0
## [31] IRanges_1.20.7
## [32] fastcluster_1.1.13
## [33] reshape2_1.4
## [34] ggplot2_1.0.0
## [35] RSQLite_0.11.4
## [36] DBI_0.2-7
## [37] BiocGenerics_0.8.0
## [38] knitr_1.6
##
## loaded via a namespace (and not attached):
## [1] biomaRt_2.18.0      biovizBase_1.10.8   bitops_1.0-6
## [4] caTools_1.17        cluster_1.15.2      colorspace_1.2-4
## [7] dichromat_2.0-0     digest_0.6.4        DO.db_2.7
## [10] evaluate_0.5.5      formatR_0.10        Formula_1.1-1
## [13] GenomicFeatures_1.14.5 GOsemSim_1.20.3     graph_1.40.1
## [16] graphite_1.8.1      gtools_3.4.1        Hmisc_3.14-4
## [19] igrph_0.7.1         KEGG.db_2.10.1     KernSmooth_2.23-12
## [22] labeling_0.2        lattice_0.20-29     latticeExtra_0.6-26
## [25] MASS_7.3-33         Matrix_1.1-3        munsell_0.4.2
## [28] org.Hs.eg.db_2.10.1 proto_0.3-10        qvalue_1.36.0
## [31] Rcpp_0.11.2         RCurl_1.95-4.1     reactome.db_1.46.1
## [34] Rsamtools_1.14.3    scales_0.2.4        splines_3.0.2
## [37] stats4_3.0.2        survival_2.37-7     tcltk_3.0.2
## [40] tools_3.0.2         XML_3.98-1.1       zlibbioc_1.8.0

```



## Run Info

```
##          param
## 1      cmd_line
## 2          version
## 3  SVN_revision
## 4  boost_version
## 5          genome
##
## 1 cuffdiff -p 10 -L WT,Manr -o /n/rinn_data1/seq/lgoff/Projects/BrainMap/data/diffs/Manr_vs_WT_Embryonic /n/rinn_data1/seq/lgoff/Projects/BrainMap/data/
## 2
## 3
## 4
## 5
```

# Peril KO vs WT (Adult)

This file shows the wt-v-ko comparison for Peril.

Cuff overview:

```
## CuffSet instance with:  
## 2 samples  
## 26754 genes  
## 77524 isoforms  
## 0 TSS  
## 23066 CDS  
## 0 promoters  
## 0 splicing  
## 19954 relCDS
```

## QC

### Dispersion

Dispersion plot for genes in cuff: (Overdispersion can lead to innacurate quants)

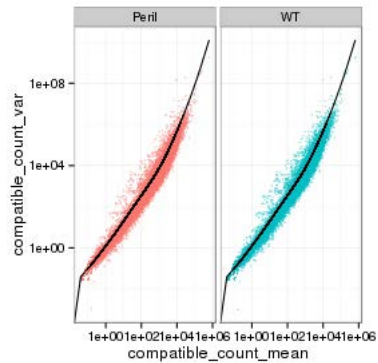

### Cross-replicate variability (fpkmSCVplot)

Differences in CV 2 can result in lower numbers of differentially expressed genes due to a higher degree of variability between replicate fpkm estimates.

Genes:

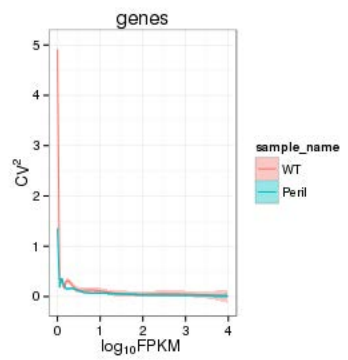

Isoforms:

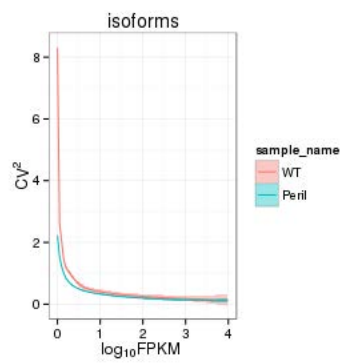

## MvA plot

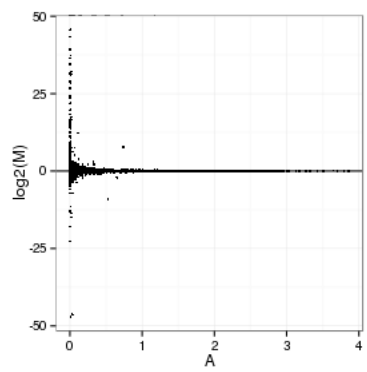

MvA plot counts

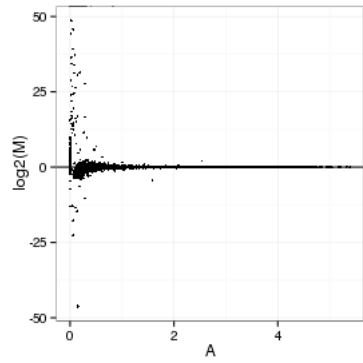

## Scatterplot matrix

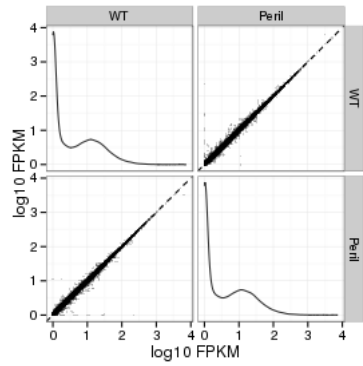

## Distributions

### Boxplots

Boxplot (genes)

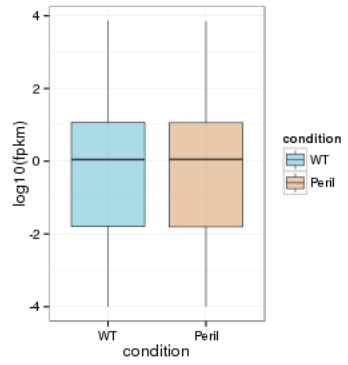

Boxplot (genes, replicates)

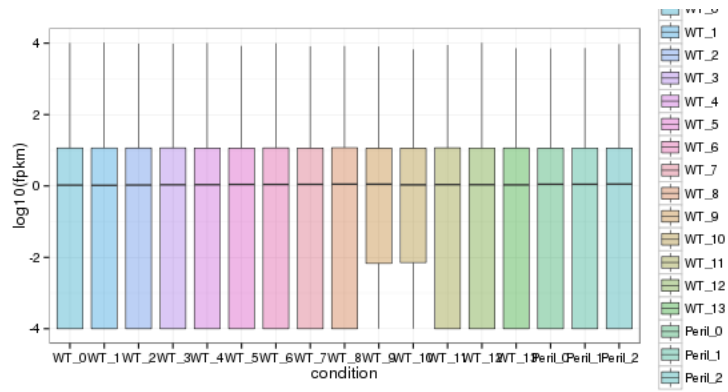

Boxplot (isoforms)

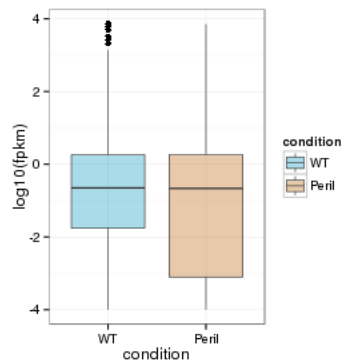

Boxplot (isoforms, replicates)

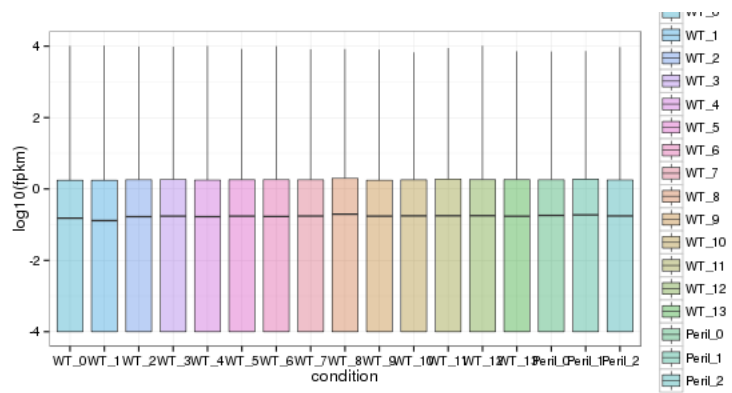

## Density

Density (genes)

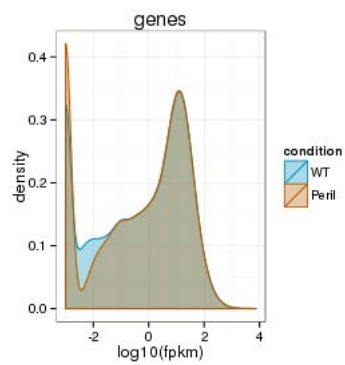

Density (genes, replicates)

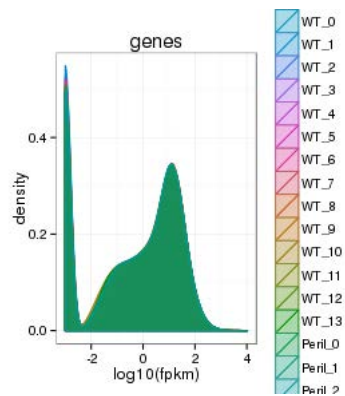

# Clustering

## Replicate Clusters

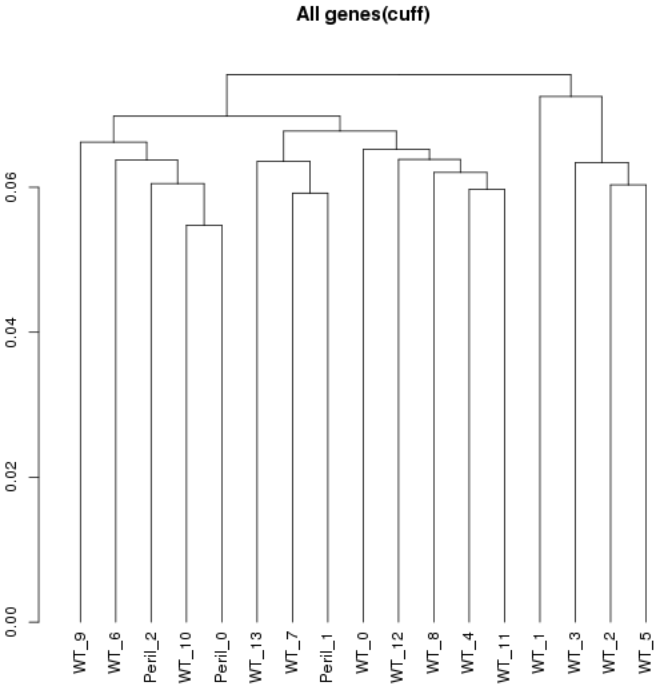

## NULL

## PCA (genes)

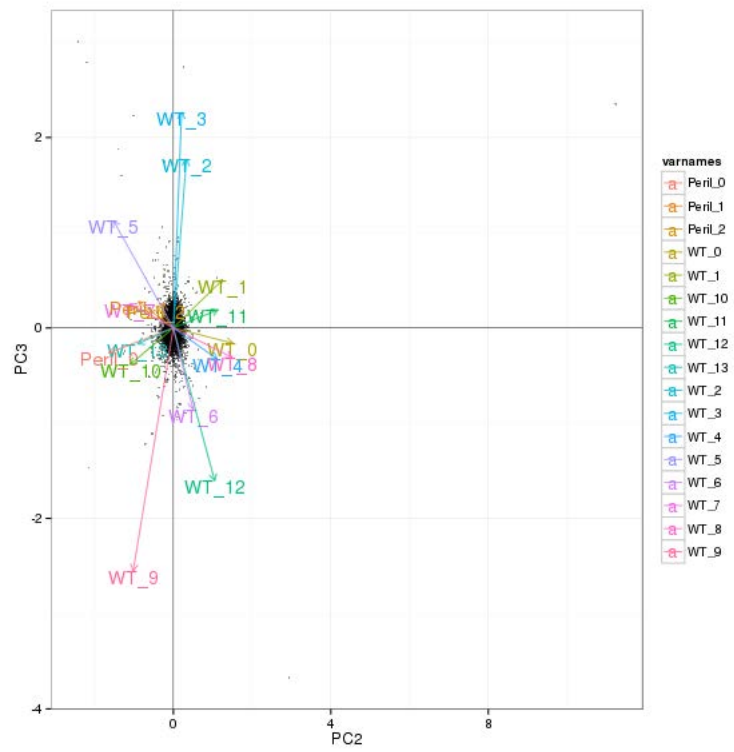

**MDS (genes)**



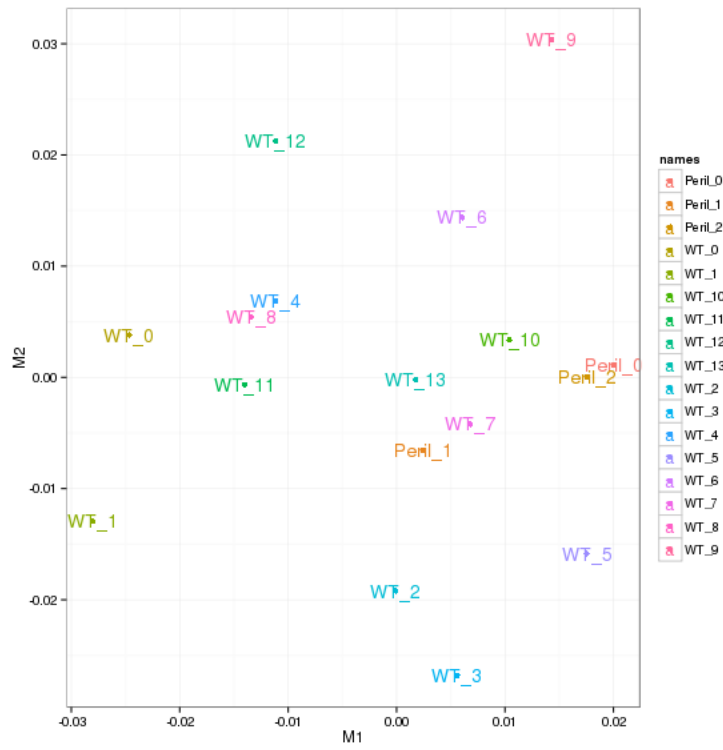

**KO assessment**  
**Endogenous IncRNA expression**

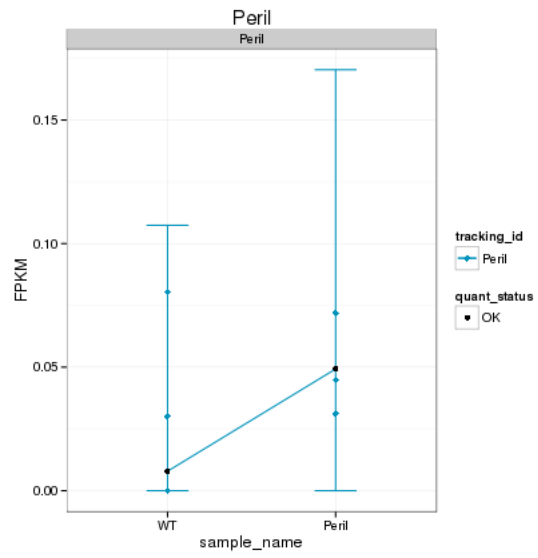

Endogenous expression of Peril isoforms:

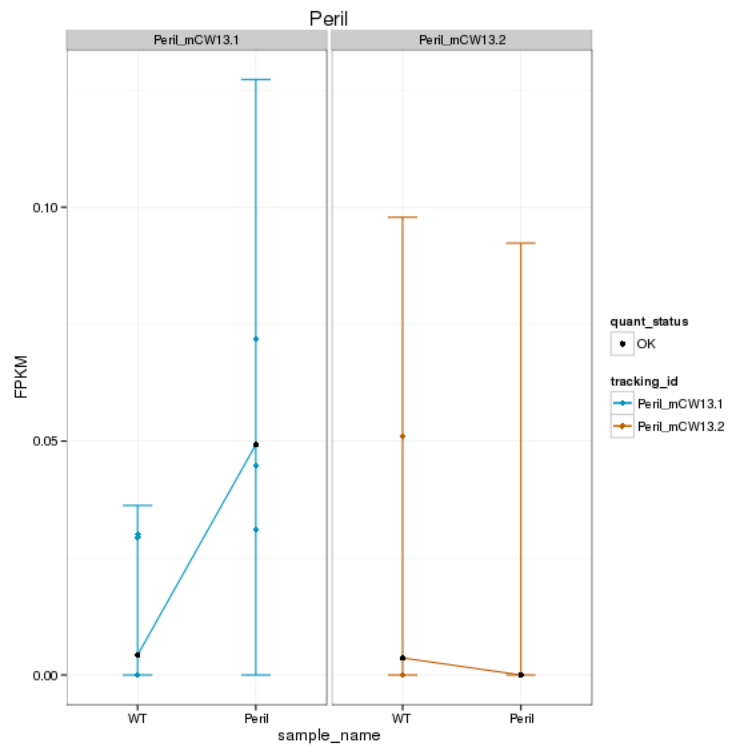

Barplot of gene expression:

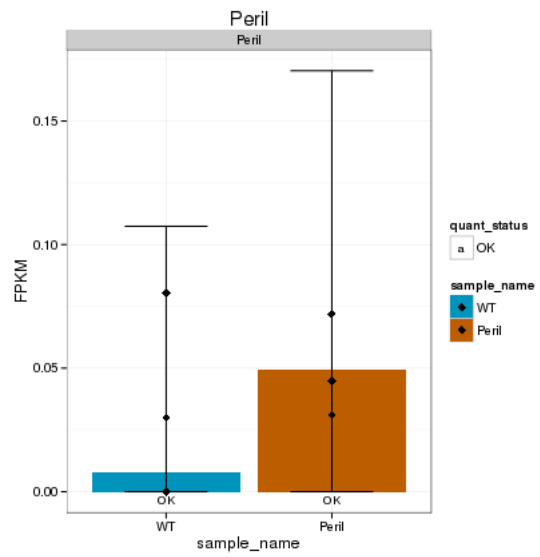

Barplot of isoform expression:

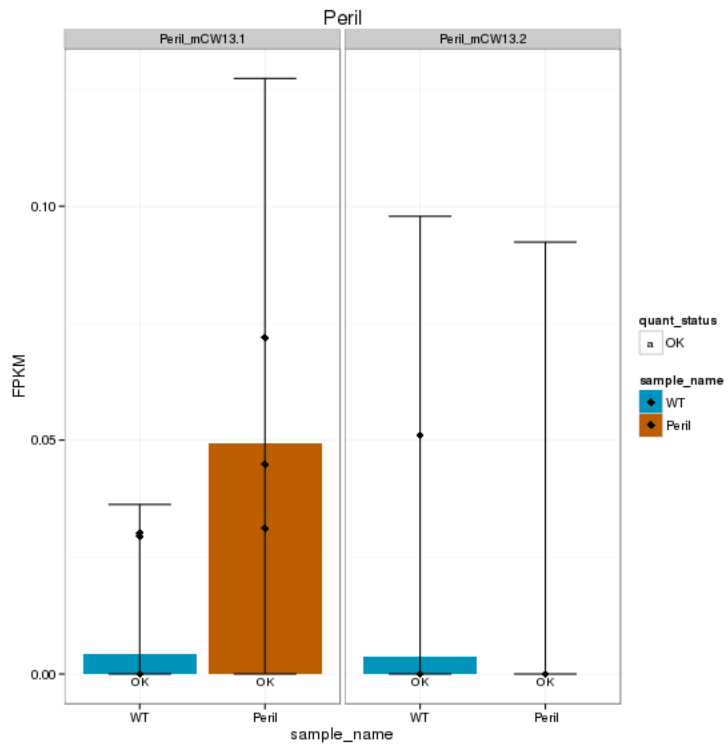

## LacZ expression

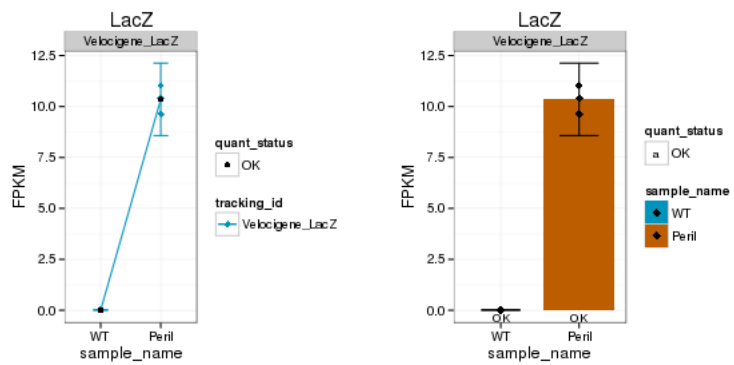

## Digital Genotyping (LacZ vs Endogenous lincRNA and Sex)

Eif2s3y is a y-expressed gene, Xist is an x-expressed gene Expression plot (endogenous linc, lacZ, Y-expressed gene):

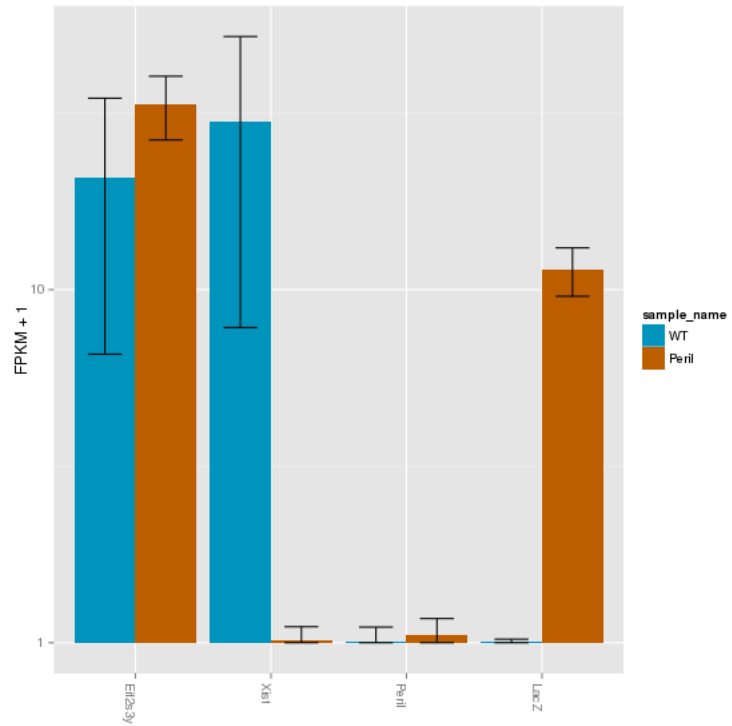

Expression heatmap:

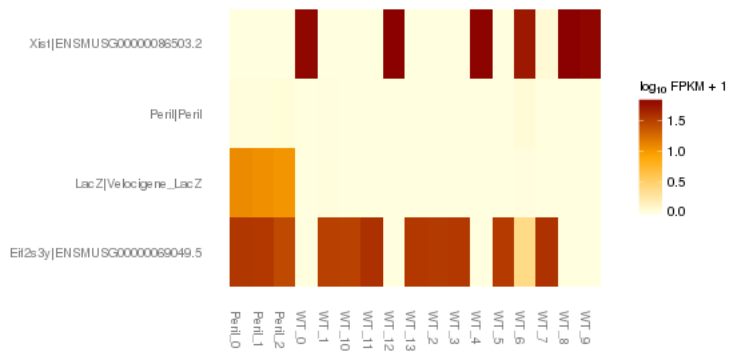

Track visualization

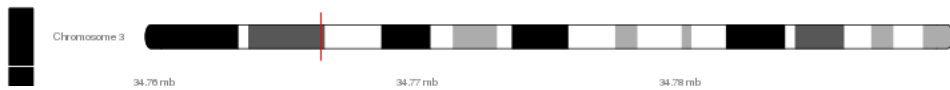

KO Region Per1\_Q2 Per1\_Q3 Per1\_Q0 WT\_Q13 WT\_Q12 WT\_Q11 WT\_Q10 WT\_Q9 WT\_Q8 WT\_Q7 WT\_Q6 WT\_Q5 WT\_Q4 WT\_Q3 WT\_Q2 WT\_Q1 WT\_Q0 LncRNA Isoforms

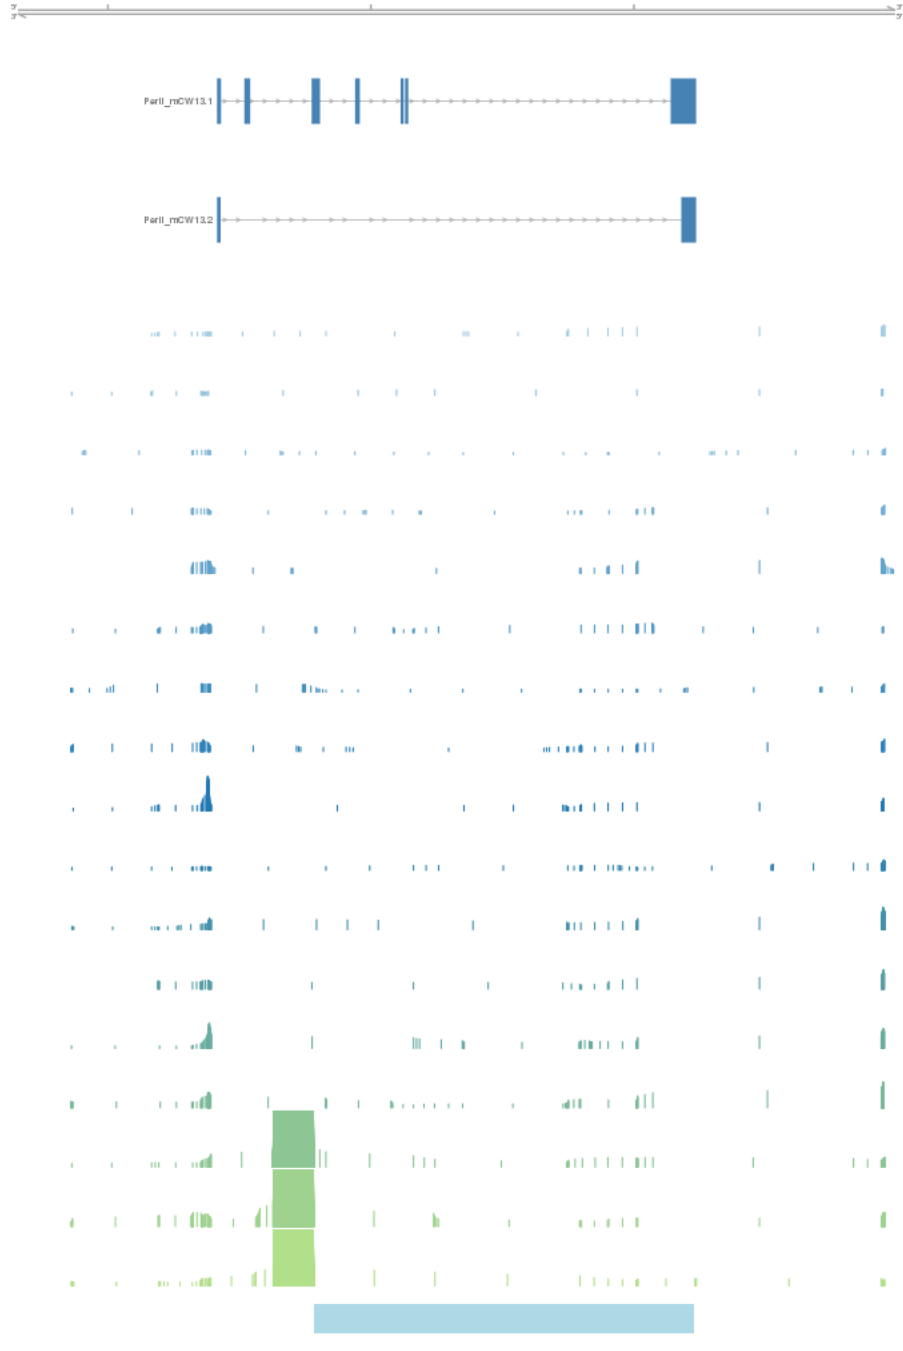

# Differential Analysis

## Differential Genes

There are 215 significantly differentially expressed genes. They are:

|    | geneAnnot\$gene_short_name |
|----|----------------------------|
| 1  | Wnt9a                      |
| 2  | Gabra2                     |
| 3  | Sox9                       |
| 4  | Mmp14                      |
| 5  | Chordc1                    |
| 6  | Plin4                      |
| 7  | Arrdc2                     |
| 8  | Klf4                       |
| 9  | Calr                       |
| 10 | Hif3a                      |
| 11 | 9330159F19Rik              |
| 12 | Nes                        |
| 13 | Epha2                      |
| 14 | Lrrc8a                     |
| 15 | Homer1                     |
| 16 | Bcl2l1                     |
| 17 | Dio2                       |
| 18 | Mertk                      |
| 19 | Camk1g                     |
| 20 | Sdc4                       |
| 21 | Ada                        |
| 22 | Etnppl                     |
| 23 | P4ha1                      |
| 24 | Arid5b                     |
| 25 | Sgk1                       |
| 26 | Gm872                      |
| 27 | Ndufa12                    |
| 28 | Timp3                      |
| 29 | Pttg1                      |
| 30 | Btg2                       |
| 31 | Gatsl3                     |
| 32 | Xbp1                       |
| 33 | Pdia6                      |
| 34 | Fam20a                     |
| 35 | Adi1                       |
| 36 | Camkk1                     |
| 37 | Per1                       |



38 Nfkbia  
39 Serpina3n  
40 Zfp361l  
41 Fos  
42 Pcsk1  
43 Fam107a  
  
44 Dnajc3  
45 Fzd6  
46 Myh9  
47 Slc38a2  
48 Bcl6  
49 Arc  
50 Sdf2l1  
51 Arhgap31  
52 Ifnar1  
53 Cdkn1a  
54 Creld2  
55 Tnfrsf12a  
56 Xdh  
57 Tekt4  
58 Dusp1  
59 Fkbp5  
60 Spry4  
61 Pdgfrb  
62 Atp10a  
63 Kdm5c  
64 D3Ert751e  
65 Pdia4  
66 Paqr8  
67 Slc40a1  
68 Pfkfb3  
69 Lcn2  
70 Hspa5  
  
71 Spred1  
72 Fam83d  
73 Anxa5  
74 Exosc9  
75 Schip1  
76 F3  
77 Trp53inp1  
78 Nr4a3  
79 Slc2a1  
80 Mfsd2a

81 Tinagl1  
82 Errfi1  
83 Fosl2  
84 Aff1  
85 Rasgef1b  
86 Lfng  
87 Hsph1  
88 Klf15  
89 Slc6a6  
90 Bhlhe40  
91 Adipor2  
92 Emp1  
93 Pglyrp1  
94 Rhpn2  
95 Hdcd3  
96 Sult1a1  
97 Lyve1  
98 Polr3e  
99 Tsc22d3  
100 Dusp4  
101 Plat  
102 Galnt7  
103 Gpt2  
104 Mt2  
105 Herpud1  
106 Ldlr  
107 Eomes  
108 Slc16a1  
109 Tbc1d4  
110 Galnt9  
111 Egr3  
112 Tlr13  
113 Klf9  
114 Trim36  
115 Trim59  
116 Pla2g3  
117 Prr7  
118 Nostrin  
119 Dusp5  
120 Arl4d  
121 Lars2  
122 Adrb1  
123 Dnajb5

124 Micall2  
125 Anln  
126 Psenen  
127 Mxd4  
128 Tob1  
129 Avp  
130 Smim3  
131 Bend3  
132 Txnip  
133 Irs2  
134 Eltd1  
135 Pcsk1n  
136 Tnfsf10  
137 C1qtnf4  
138 Rps19  
139 Cables1  
140 Nkx6-2  
141 Mup4  
142 Cldn5  
143 Pkp2  
144 Sgsm1  
145 Jhdm1d  
146 Maff  
147 Id1  
148 Tuba1c  
149 Gjc2  
150 1700048O20Rik  
151 Nxpe4  
152 Ctla2a  
153 Cirbp  
  
154 Zfp36l2  
155 Npas4  
156 Plaur  
157 Fat4  
158 Marcks11  
159 Stbd1  
160 Hes5  
161 Bdnf  
162 Mex3d  
163 Dact2  
164 Pdp1  
165 Cdc42ep1  
166 Rasd1

167 Opalin  
168 Ppp1r3g  
169 Plekho2  
170 Islr2  
171 Klf13  
172 Jun  
173 Junb  
174 Tnfaip6  
175 Ier2  
176 Mat2a  
177 1810037117Rik  
178 A930005H10Rik  
179 Mettl7a1  
180 Per2  
181 1810011O10Rik  
182 Kdm5d  
183 Mex3b  
184 Tpm3-rs7  
185 Rpl30  
186 Gm5506  
187 Sclt1  
188 Alox5ap  
189 Zbtb40  
190 Rps7  
191 Cox5b  
192 Rpl34  
193 Kdr  
194 Aldoart2  
195 mt-Co1  
196 Zbtb16  
197 Zfp810  
198 Ddx3y  
199 Jund  
200 Egr4  
201 Gm7292  
202 Plekhf1  
203 B3galt5  
204 Fjx1  
205 Rprm  
206 Ly6a  
207 Ly6c1  
208 Gm11273  
209 Xist

- 210 Slc5a3
- 211 A930033H14Rik
- 212 Apold1
- 213 Hspa1b
- 214 AA465934
- 215 Gm7094

### Matrix of gene significant differences between conditions

(skip for Brainmap wt-v-ko comparisons)

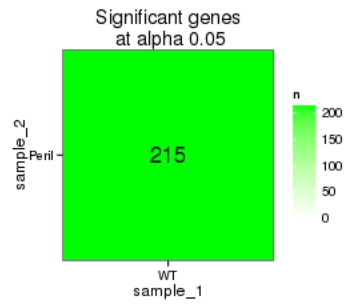

### Significant gene expression differences between conditions

Expression plot (genes):(turned off)

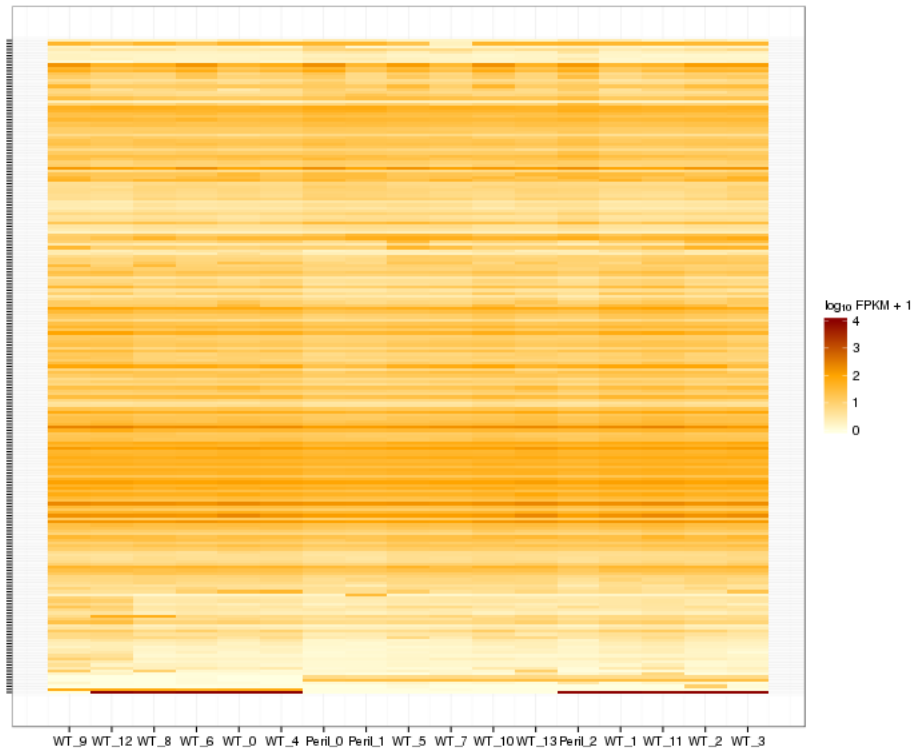

Significant genes with expression >50fpm (any condition):(turned off)

An individual look at each of the highly expressed significantly differentially regulated genes: (eval=false for first pass)

## Expression-level/significance relationship

Scatter plot of significant genes only:

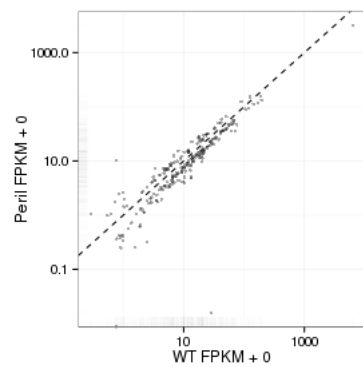

### Volcano Plot

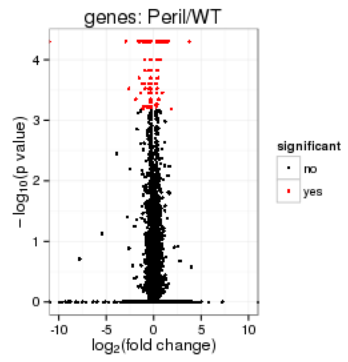

### Volcano plot with significant genes only:

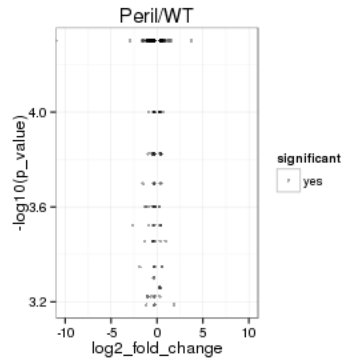

### FoldChange Heatmap

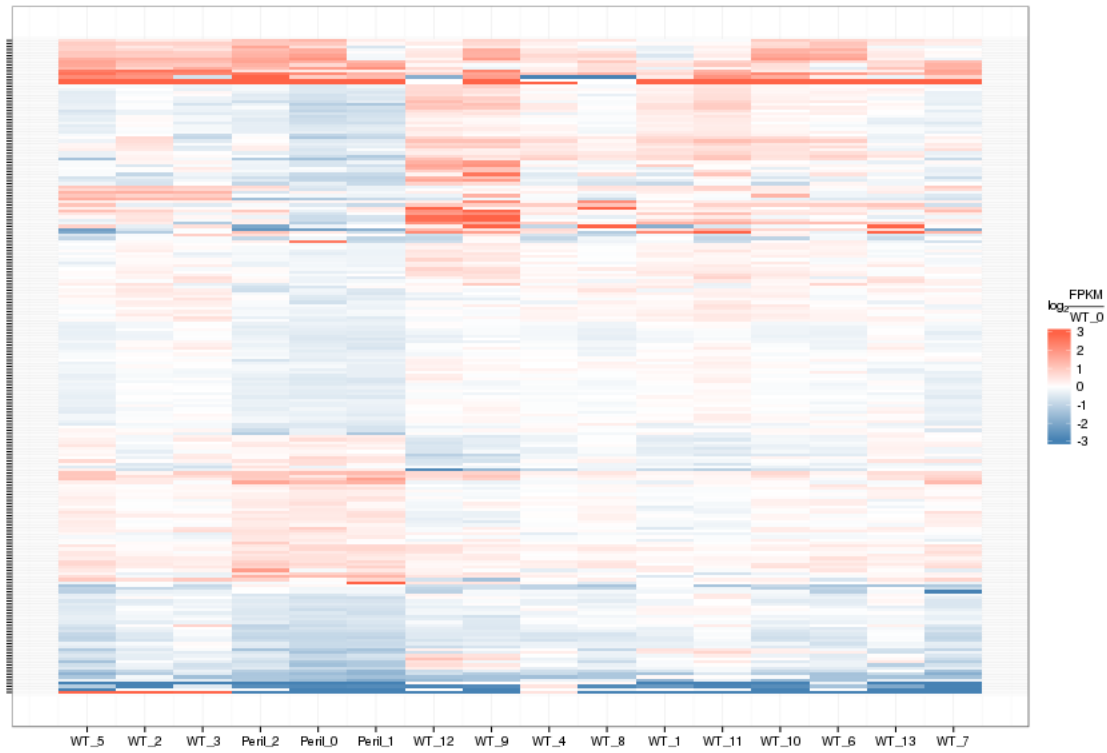

## Differential Splicing

### Differential Isoforms between conditions

Per isoform difference between conditions:

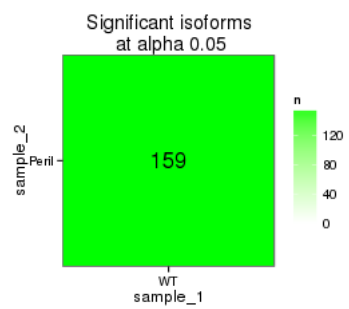



These isoforms are:

|    | <b>isoAnnot\$gene_short_name</b> |
|----|----------------------------------|
| 1  | Gabra2                           |
| 2  | Sox9                             |
| 3  | Mmp14                            |
| 4  | Arrdc2                           |
| 5  | Klf4                             |
| 6  | Hif3a                            |
| 7  | 9330159F19Rik                    |
| 8  | Nes                              |
| 9  | Prir                             |
| 10 | Epha2                            |
| 11 | Lrrc8a                           |
| 12 | Homer1                           |
| 13 | Dio2                             |
| 14 | Mertk                            |
| 15 | Camk1g                           |
| 16 | Sdc4                             |
| 17 | Ada                              |
| 18 | Arid5b                           |
| 19 | Sgk1                             |
| 20 | Gm872                            |
| 21 | Ntn4                             |
| 22 | Fgd6                             |
| 23 | Timp3                            |
| 24 | Cpm                              |
| 25 | Tns3                             |
| 26 | Btg2                             |
| 27 | Xbp1                             |
| 28 | Pdia6                            |
| 29 | Fam20a                           |
| 30 | Nfkbia                           |
| 31 | Serpina3n                        |
| 32 | Zfp36l1                          |
| 33 | Otub2                            |
| 34 | Fos                              |
| 35 | Pcsk1                            |
| 36 | Fam107a                          |
| 37 | Dnajc3                           |
| 38 | Myh9                             |
| 39 | Slc38a2                          |
| 40 | Bcl6                             |

41 Sdf2l1  
42 Arhgap31  
43 Ap2m1  
44 Cdkn1a  
45 Tnfrsf12a  
46 Xdh  
47 Fkbp5  
48 Pdgfrb  
49 Kdm5c  
50 D3Erttd751e  
51 Pdia4  
52 Paqr8  
53 Slc40a1  
54 Hspa5  
55 Fam83d  
56 Mccc1  
57 Anxa5  
58 Exosc9  
59 Trpc3  
60 F3  
61 Slc2a1  
62 Mfsd2a  
63 Tinagl1  
64 Map3k6  
  
65 Errfi1  
66 Fosl2  
67 Lfng  
68 Bhlhe40  
69 Adipor2  
70 Emp1  
71 Pglyrp1  
72 Hddc3  
73 Sult1a1  
74 Lyve1  
75 Tsc22d3  
76 Dusp4  
77 Plat  
78 Gpt2  
79 Mt2  
80 Ldlr  
81 Paqr5  
82 Smad3  
83 Heyl

84 Slc16a1  
85 Egr3  
86 Klf9  
87 Trim59  
88 Nostrin  
89 Dusp5  
90 Lars2  
91 Uba6  
92 Dnajb5  
93 Anln  
94 Psenen  
95 Mxd4  
96 Tob1  
97 Acer2  
98 Smim3  
99 Irs2  
100 Eltd1  
101 Pcsk1n  
102 Tnfsf10  
103 Spsb1  
104 Gjb6  
105 Fmo2  
106 C1qtnf4  
107 Nkx6-2  
108 Cldn5  
109 Sgsm1  
110 Hps4  
111 Jhdm1d  
112 Id1  
113 Gjc2  
114 Nxpe4  
115 Ctla2a  
116 Cirbp  
117 Zfp36l2  
118 Npas4  
119 Plaur  
  
120 Stbd1  
121 Hes5  
122 Mex3d  
123 Rasd1  
124 Opalin  
125 Ppp1r3g  
126 Plekho2

127 Klf13  
128 Junb  
129 Tnfrsf6  
130 Irf2  
131 Mat2a  
132 1810037117Rik  
133 Mettl7a1  
134 Per2  
135 Kdm5d  
136 Mex3b  
137 Tpm3-rs7  
138 Gm5506  
139 Zbtb40  
140 Rps7  
141 Cox5b  
142 Kdr  
143 Aldoat2  
144 Zbtb16  
145 Ddx3y  
146 Ahnak  
147 Jund  
148 Egr4  
149 Gm7292  
150 Plekhf1  
151 B3galt5  
152 Fjx1  
153 Rpm  
154 Ly6a  
155 Xist  
156 Slc5a3  
157 A930033H14Rik  
158 Apold1  
159 Hspa1b

Gene-level DE isoform heatmap

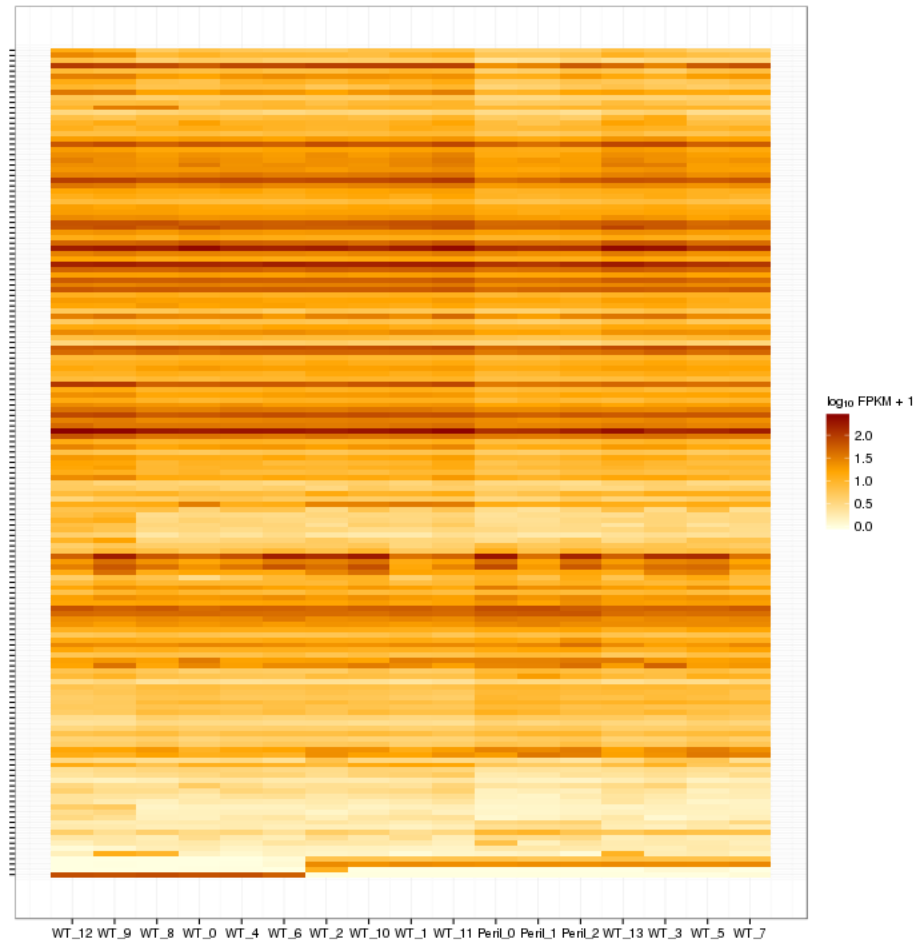

Isoform foldchange heatmap by isoform:

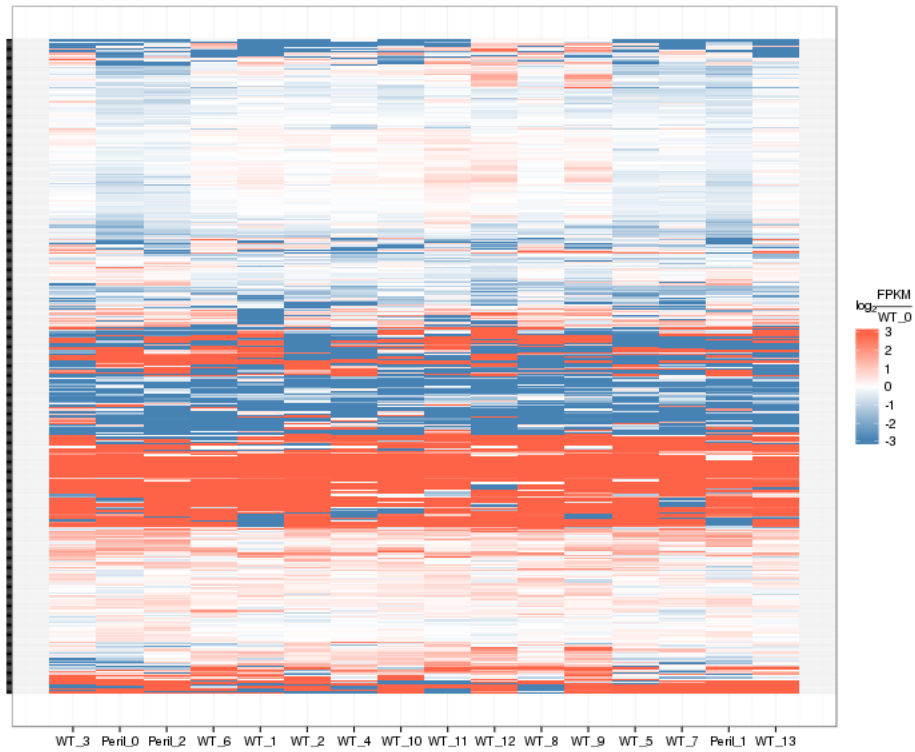

## Differential Splicing between conditions

(eval false for first pass)

Per condition differences in isoforms (Does gene have diff piechart between conditions?)

These genes are:

Splicing heatmap by isoform:

Splicing heatmap by gene

The following are significantly differentially spliced genes (relative portion of isoform per condition):

## Gene/Pathway Analysis

### GSEA

Enrichment and zscores are calculated based on expression in KO vs WT ( $\text{fpkm}_{\text{KO}}/\text{fpkm}_{\text{WT}}$ ), so genes that are down regulated in KO are shown in blue, while upregulation is shown in red.

KO/WT Blue = down in KO Red = Up in KO

Biocarta enrichment:

```
## [1] "Not enough significant categories to print a heatmap!"
```

Biocarta zscore:

```
## [1] "Not enough significant categories to print a heatmap!"
```

Reactome enrichment:

```
## Error: argument is of length zero
```

Reactome zscore:

```
## Error: incorrect number of dimensions
```

```
## Error: object 'x_ordered' not found
```

```
## Error: error in evaluating the argument 'x' in selecting a method for function 'as.matrix': Error: object 'x_ordered' not found
```

```
## Error: object 'x_ordered' not found
```

Kegg enrichment:

```
## Error: argument is of length zero
```

Kegg zscore:

```
## Error: incorrect number of dimensions
```

```
## Error: object 'x_ordered' not found
```

```
## Error: error in evaluating the argument 'x' in selecting a method for function 'as.matrix': Error: object 'x_ordered' not found
```

```
## Error: object 'x_ordered' not found
```

Interneuron enrichment:

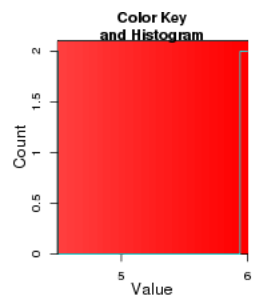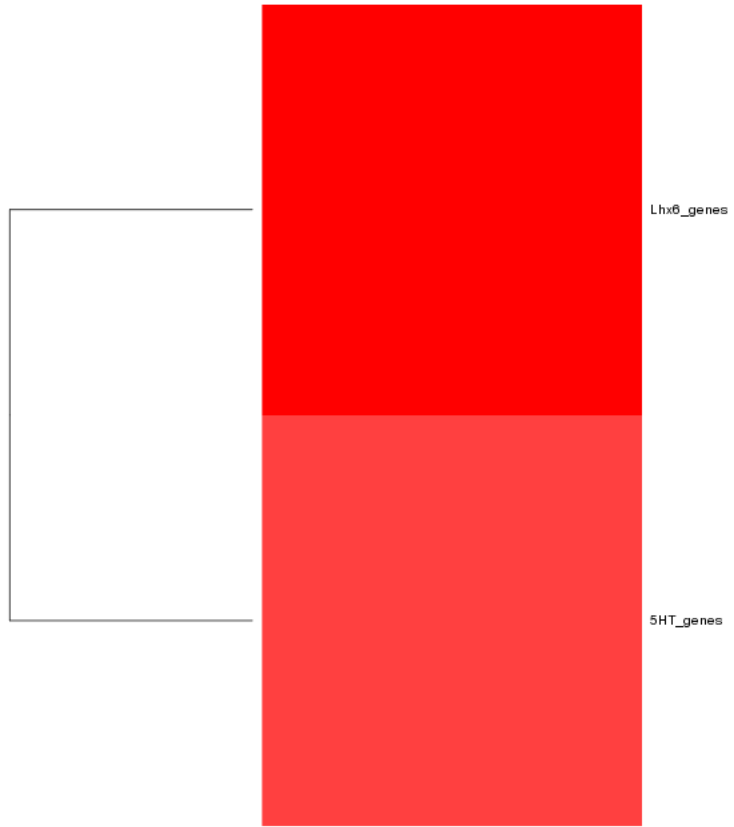

Interneuron zscore:



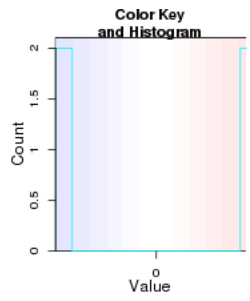

\_\_\_\_\_

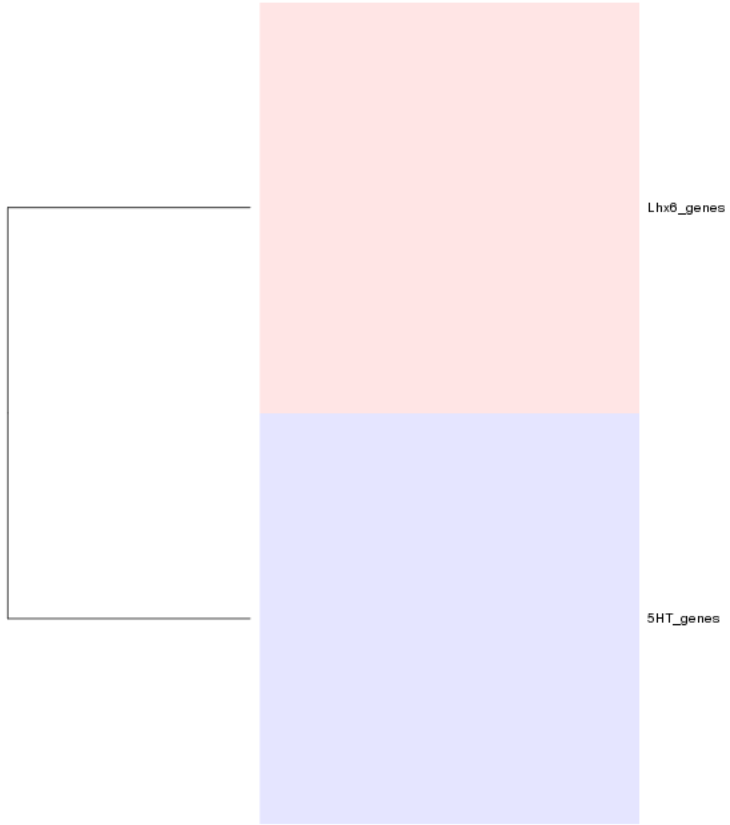

Oncogene enrichment:

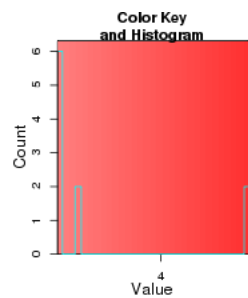

\_\_\_\_\_

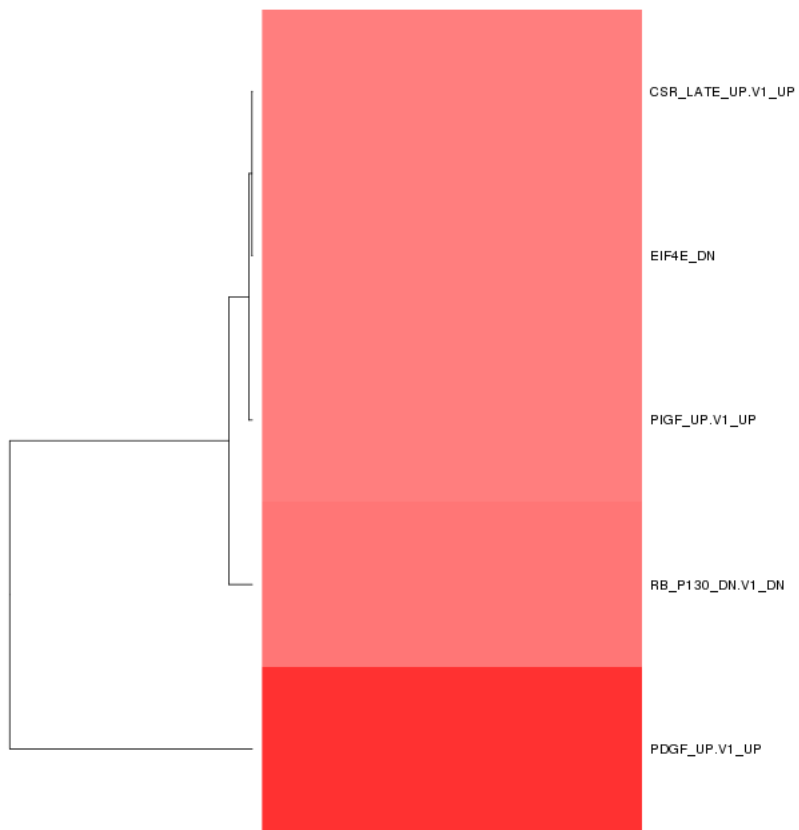

Oncogene zscore:

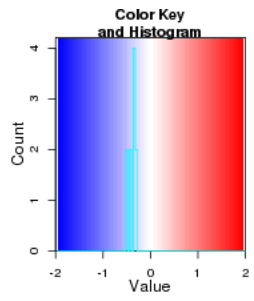

\_\_\_\_\_

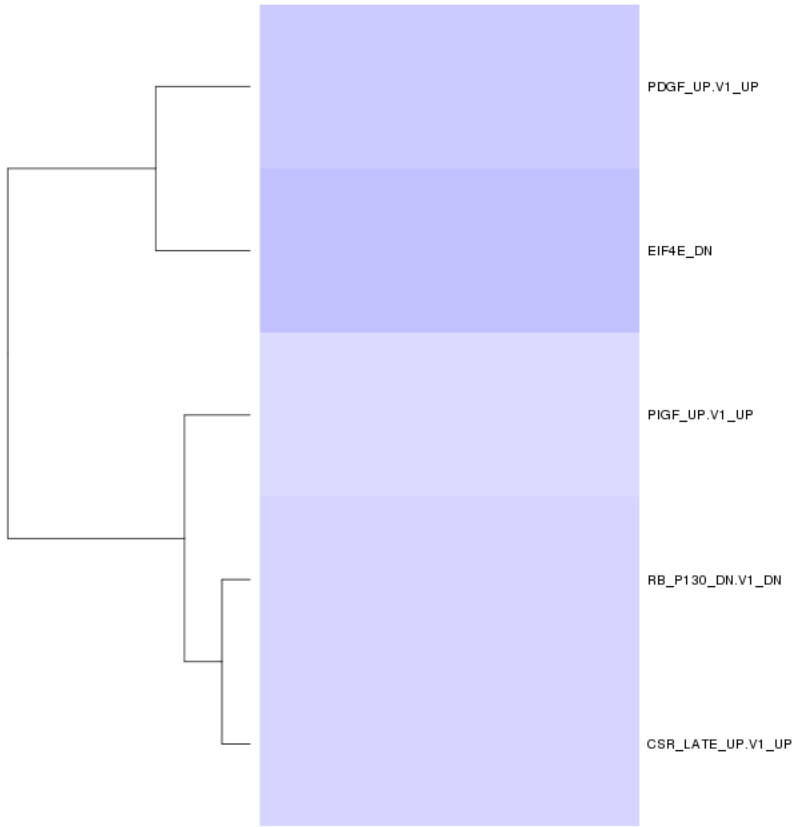

Immuno enrichment:

## Error: subscript out of bounds

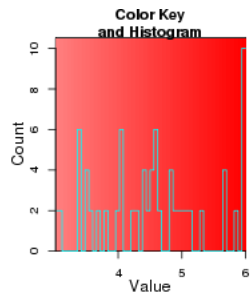

\_\_\_\_\_

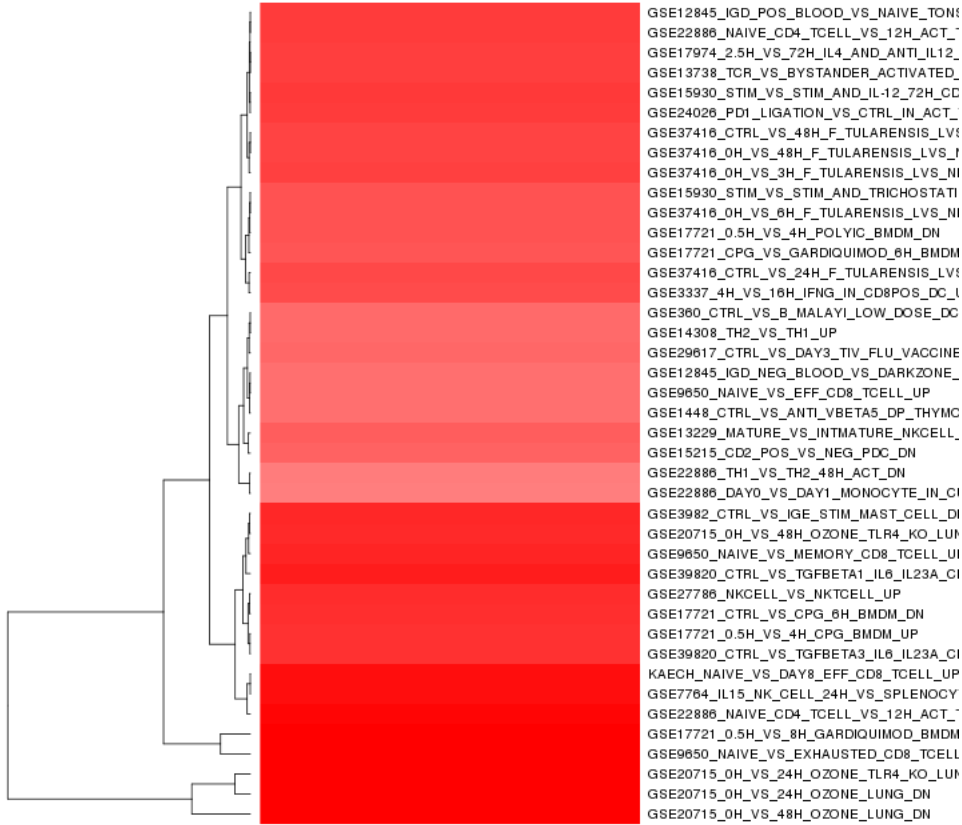

Immuno zscore:

## Error: subscript out of bounds

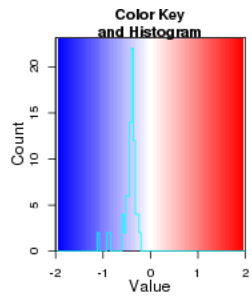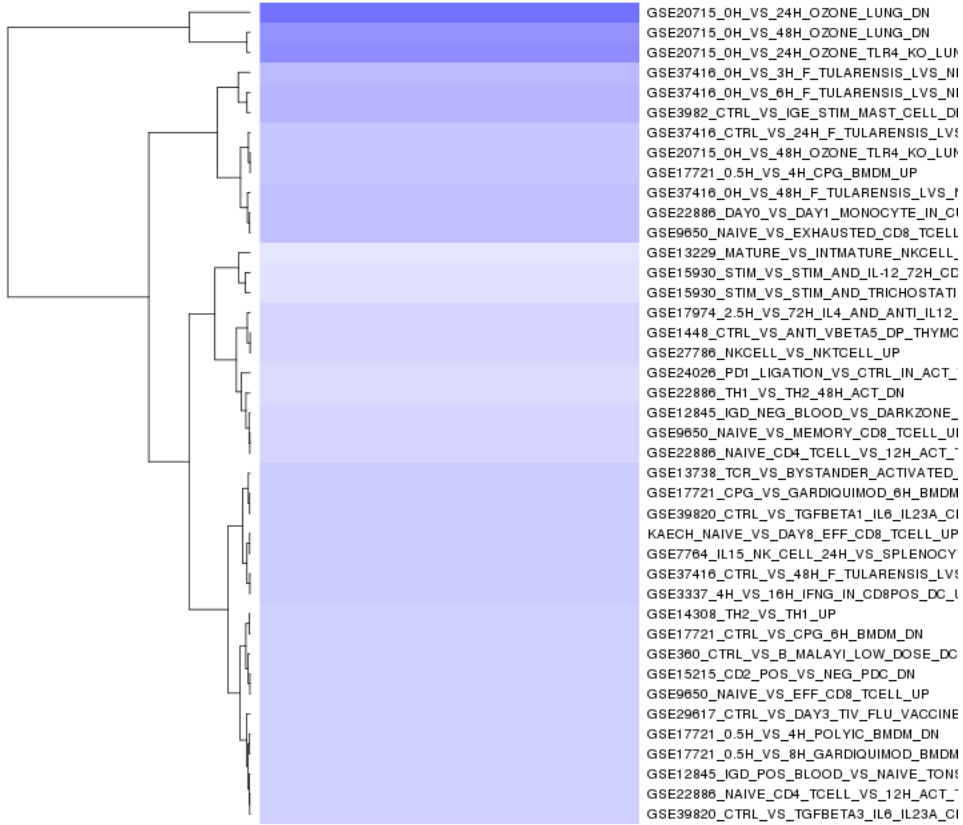

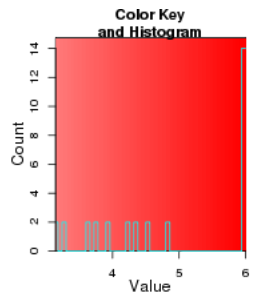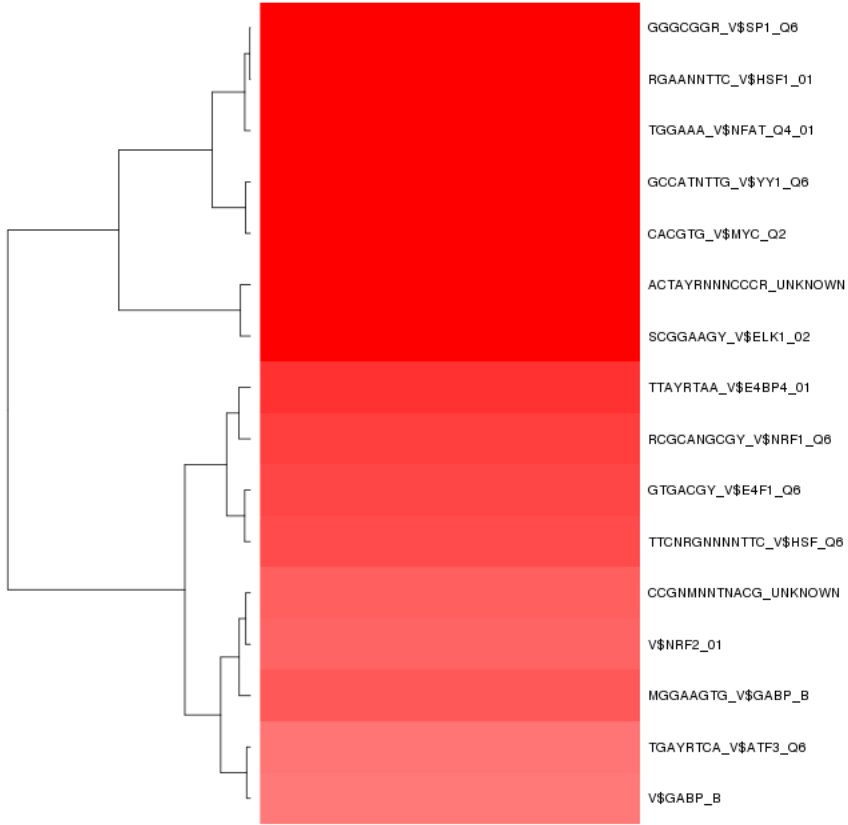

TF zscore:

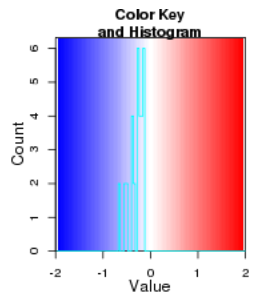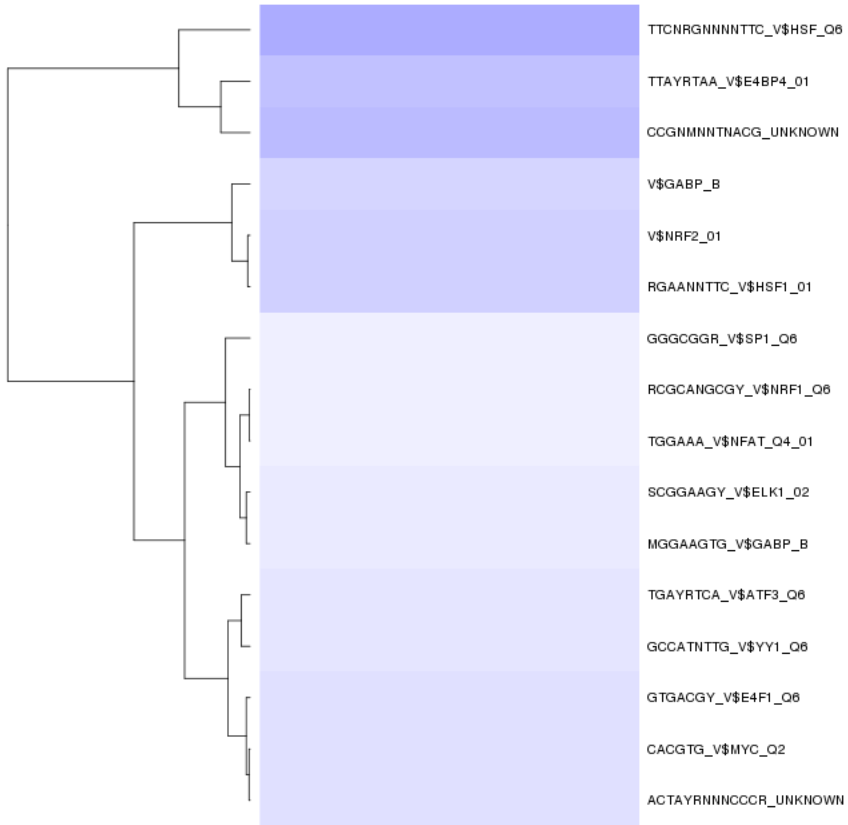

## GO enrichment

Cluster profiler used to call enrichments of significantly differentially regulated genes that map to Entrez IDs.

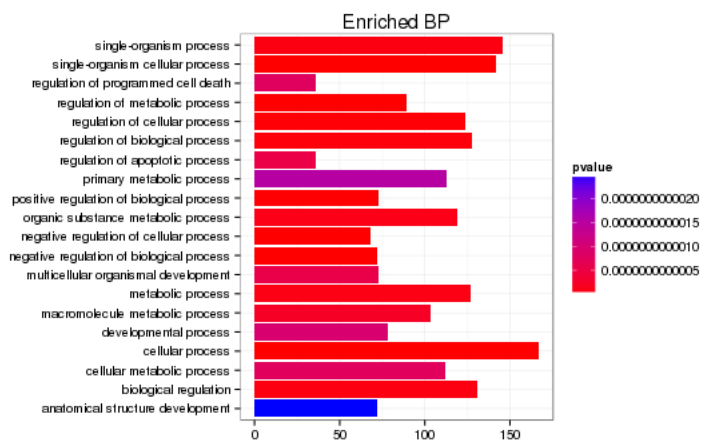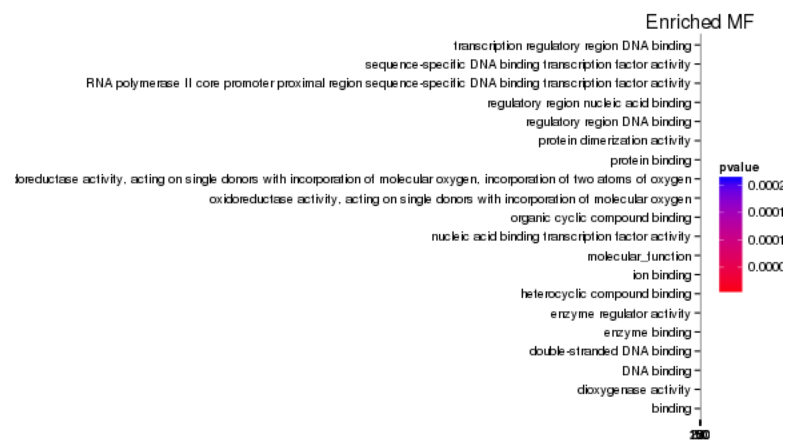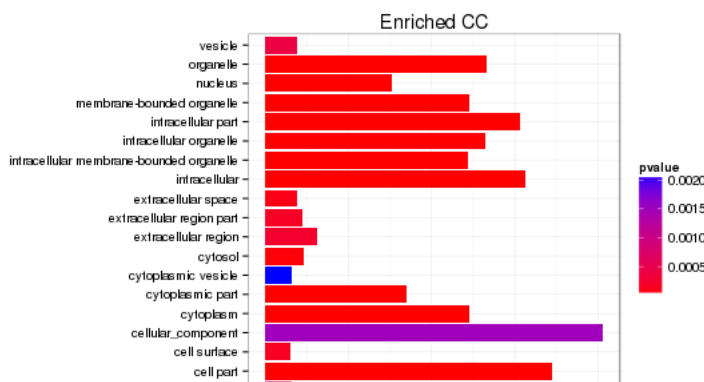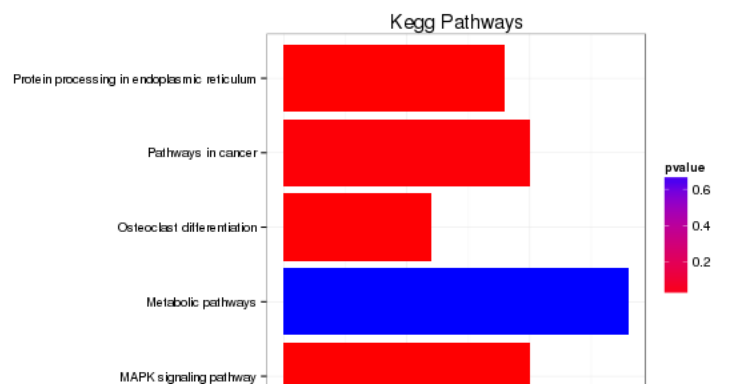



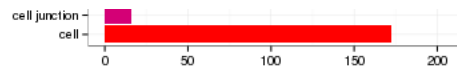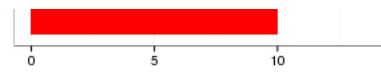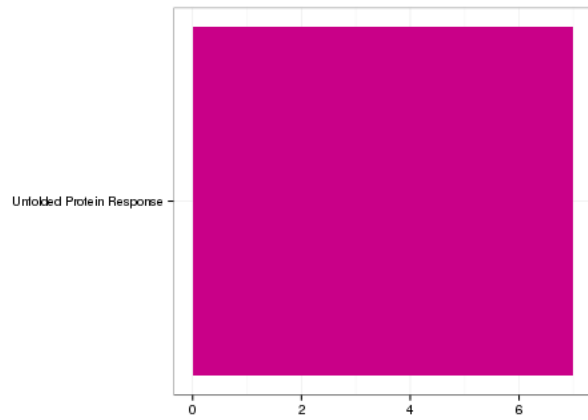

**Enrichment or depletion for stage-specific cell cycle markers**



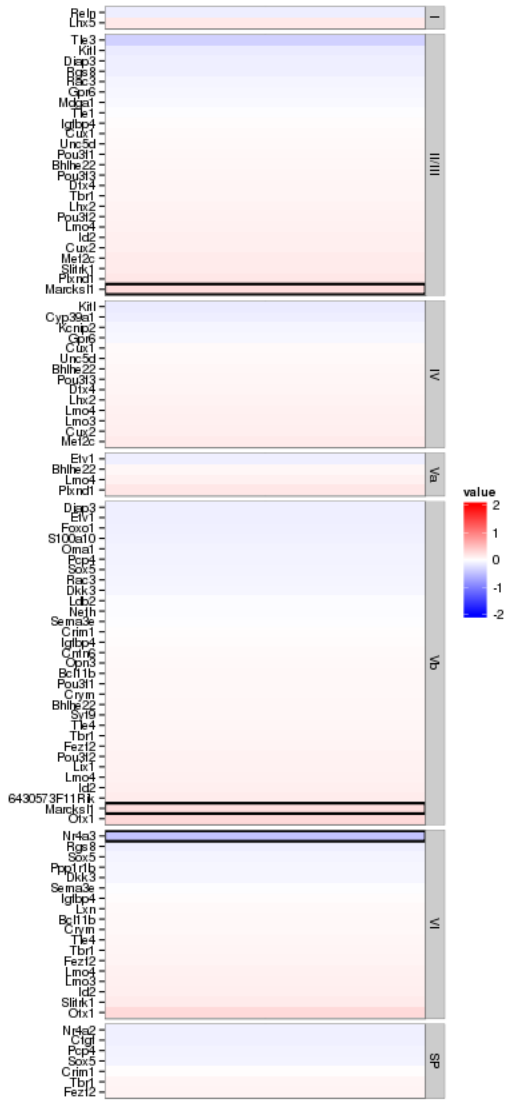

Enrichment or depletion for specific neural cell types

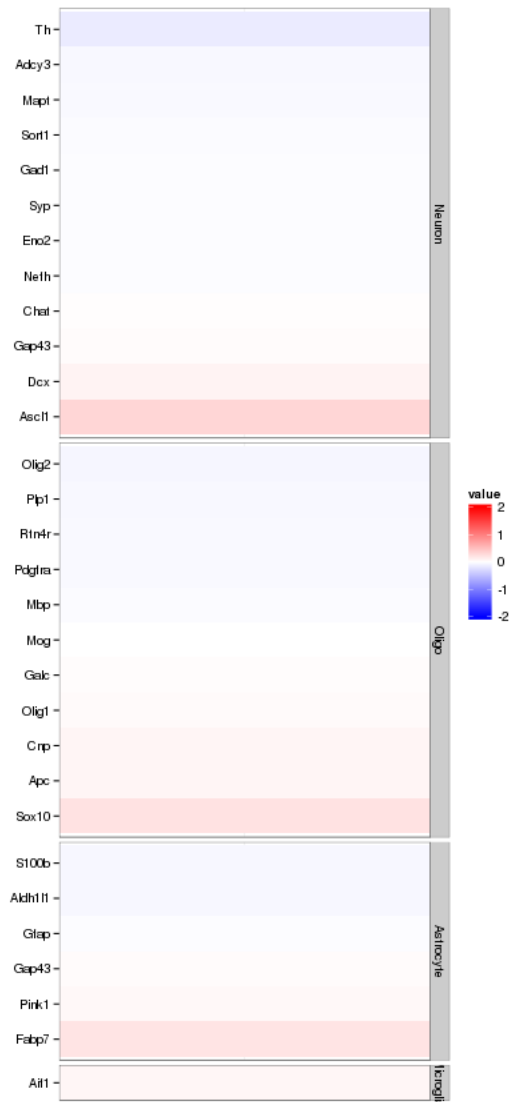

**Enrichment or Depletion of neural differentiation markers**

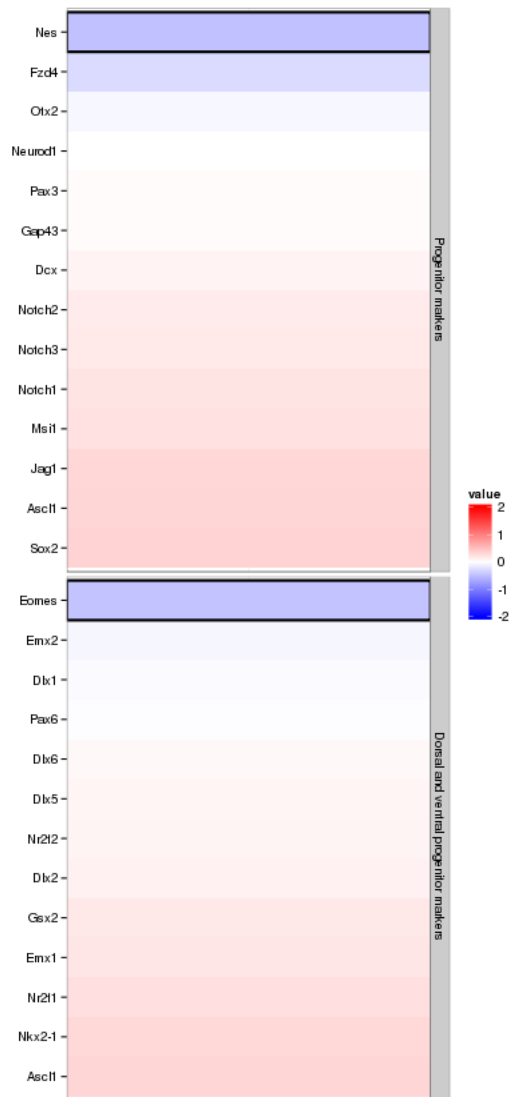

## Cis vs Trans (locally)

log2 Foldchange and test statistic are calculated with the ratio of fpkm(KO)/fpkm(WT), thus the test\_stat is positive if a gene is higher in the KO and negative if a gene has lower expression in the KO

The pvalue for 2 genes significantly regulated in a region this size is: 0.1516

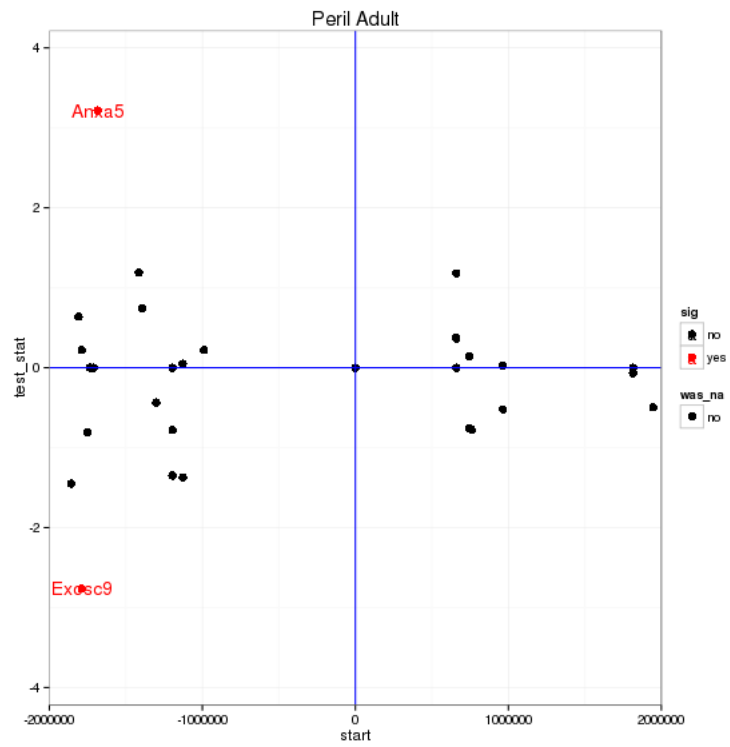

## Notes

Samples used are:

10

- 1 JR729
- 2 JR728
- 3 JR796
- 4 JR797
- 5 JR740
- 6 JR800
- 7 JR827
- 8 JR778
- 9 JR734
- 10 JR802
- 11 JR803
- 12 JR735
- 13 JR785
- 14 JR781

15 JR806  
16 JR744  
17 JR822

## Replicates

| file                                                                          | sample_name | replicate | rep_name | total_mass  | norm_mass   | internal_scale | external_scale |
|-------------------------------------------------------------------------------|-------------|-----------|----------|-------------|-------------|----------------|----------------|
| 1 /n/rinn_data1/seq/Igoff/Projects/BrainMap/data/quants/JR729/abundances.cxb  | WT          | 0         | WT_0     | 26334400.00 | 34714900.00 | 0.76           | 1.00           |
| 2 /n/rinn_data1/seq/Igoff/Projects/BrainMap/data/quants/JR728/abundances.cxb  | WT          | 1         | WT_1     | 20329200.00 | 34714900.00 | 0.58           | 1.00           |
| 3 /n/rinn_data1/seq/Igoff/Projects/BrainMap/data/quants/JR796/abundances.cxb  | WT          | 2         | WT_2     | 34089000.00 | 34714900.00 | 0.98           | 1.00           |
| 4 /n/rinn_data1/seq/Igoff/Projects/BrainMap/data/quants/JR797/abundances.cxb  | WT          | 3         | WT_3     | 28103300.00 | 34714900.00 | 0.80           | 1.00           |
| 5 /n/rinn_data1/seq/Igoff/Projects/BrainMap/data/quants/JR740/abundances.cxb  | WT          | 4         | WT_4     | 35808200.00 | 34714900.00 | 1.03           | 1.00           |
| 6 /n/rinn_data1/seq/Igoff/Projects/BrainMap/data/quants/JR800/abundances.cxb  | WT          | 5         | WT_5     | 37012200.00 | 34714900.00 | 1.07           | 1.00           |
| 7 /n/rinn_data1/seq/Igoff/Projects/BrainMap/data/quants/JR827/abundances.cxb  | WT          | 6         | WT_6     | 27786600.00 | 34714900.00 | 0.80           | 1.00           |
| 8 /n/rinn_data1/seq/Igoff/Projects/BrainMap/data/quants/JR778/abundances.cxb  | WT          | 7         | WT_7     | 39541900.00 | 34714900.00 | 1.15           | 1.00           |
| 9 /n/rinn_data1/seq/Igoff/Projects/BrainMap/data/quants/JR734/abundances.cxb  | WT          | 8         | WT_8     | 34480600.00 | 34714900.00 | 1.01           | 1.00           |
| 10 /n/rinn_data1/seq/Igoff/Projects/BrainMap/data/quants/JR802/abundances.cxb | WT          | 9         | WT_9     | 45467400.00 | 34714900.00 | 1.30           | 1.00           |
| 11 /n/rinn_data1/seq/Igoff/Projects/BrainMap/data/quants/JR803/abundances.cxb | WT          | 10        | WT_10    | 52130400.00 | 34714900.00 | 1.50           | 1.00           |
| 12 /n/rinn_data1/seq/Igoff/Projects/BrainMap/data/quants/JR735/abundances.cxb | WT          | 11        | WT_11    | 34994400.00 | 34714900.00 | 1.01           | 1.00           |
| 13 /n/rinn_data1/seq/Igoff/Projects/BrainMap/data/quants/JR785/abundances.cxb | WT          | 12        | WT_12    | 34173600.00 | 34714900.00 | 0.97           | 1.00           |
| 14 /n/rinn_data1/seq/Igoff/Projects/BrainMap/data/quants/JR781/abundances.cxb | WT          | 13        | WT_13    | 41538900.00 | 34714900.00 | 1.20           | 1.00           |
| 15 /n/rinn_data1/seq/Igoff/Projects/BrainMap/data/quants/JR806/abundances.cxb | Peril       | 0         | Peril_0  | 40528700.00 | 34714900.00 | 1.17           | 1.00           |
| 16 /n/rinn_data1/seq/Igoff/Projects/BrainMap/data/quants/JR744/abundances.cxb | Peril       | 1         | Peril_1  | 38767500.00 | 34714900.00 | 1.13           | 1.00           |
| 17 /n/rinn_data1/seq/Igoff/Projects/BrainMap/data/quants/JR822/abundances.cxb | Peril       | 2         | Peril_2  | 33329500.00 | 34714900.00 | 0.97           | 1.00           |

## Session Info

```
## R version 3.0.2 (2013-09-25)
## Platform: x86_64-unknown-linux-gnu (64-bit)
##
## locale:
## [1] LC_CTYPE=en_US.UTF-8      LC_NUMERIC=C
## [3] LC_TIME=en_US.UTF-8      LC_COLLATE=en_US.UTF-8
## [5] LC_MONETARY=en_US.UTF-8  LC_MESSAGES=en_US.UTF-8
## [7] LC_PAPER=en_US.UTF-8     LC_NAME=C
## [9] LC_ADDRESS=C             LC_TELEPHONE=C
## [11] LC_MEASUREMENT=en_US.UTF-8 LC_IDENTIFICATION=C
##
## attached base packages:
## [1] grid      parallel  methods  stats    graphics grDevices utils
## [8] datasets base
##
## other attached packages:
## [1] plyr_1.8.1
## [2] stringr_0.6.2
## [3] seqbias_1.10.0
```

```

## [4] BSgenome.Mmusculus.UCSC.mm10_1.3.19
## [5] BSgenome_1.30.0
## [6] Biostrings_2.30.1
## [7] gdata_2.13.3
## [8] GO.db_2.10.1
## [9] org.Mm.eg.db_2.10.1
## [10] clusterProfiler_1.13.1
## [11] DOSE_2.0.0
## [12] ReactomePA_1.6.1
## [13] AnnotationDbi_1.24.0
## [14] Biobase_2.22.0
## [15] mgcv_1.7-29
## [16] nlme_3.1-117
## [17] RMySQL_0.9-3
## [18] RColorBrewer_1.0-5
## [19] gridExtra_0.9.1
## [20] gtable_0.1.2
## [21] marray_1.40.0
## [22] gplots_2.13.0
## [23] GSA_1.03
## [24] limma_3.18.13
## [25] xtable_1.7-3
## [26] cummeRbund_2.7.2
## [27] Gviz_1.6.0
## [28] rtracklayer_1.22.7
## [29] GenomicRanges_1.14.4
## [30] XVector_0.2.0
## [31] IRanges_1.20.7
## [32] fastcluster_1.1.13
## [33] reshape2_1.4
## [34] ggplot2_1.0.0
## [35] RSQLite_0.11.4
## [36] DBI_0.2-7
## [37] BiocGenerics_0.8.0
## [38] knitr_1.6
##
## loaded via a namespace (and not attached):
## [1] biomaRt_2.18.0      biovizBase_1.10.8   bitops_1.0-6
## [4] caTools_1.17        cluster_1.15.2      colorspace_1.2-4
## [7] dichromat_2.0-0     digest_0.6.4        DO.db_2.7
## [10] evaluate_0.5.5      formatR_0.10        Formula_1.1-1
## [13] GenomicFeatures_1.14.5 GOsemSim_1.20.3     graph_1.40.1
## [16] graphite_1.8.1      gtools_3.4.1        Hmisc_3.14-4
## [19] igrph_0.7.1         KEGG.db_2.10.1     KernSmooth_2.23-12
## [22] labeling_0.2        lattice_0.20-29     latticeExtra_0.6-26
## [25] MASS_7.3-33         Matrix_1.1-3        munsell_0.4.2
## [28] org.Hs.eg.db_2.10.1 proto_0.3-10        qvalue_1.36.0
## [31] Rcpp_0.11.2         RCurl_1.95-4.1     reactome.db_1.46.1
## [34] Rsamtools_1.14.3    scales_0.2.4        splines_3.0.2
## [37] stats4_3.0.2        survival_2.37-7     tcltk_3.0.2
## [40] tools_3.0.2         XML_3.98-1.1       zlibbioc_1.8.0

```



## Run Info

```
##          param
## 1      cmd_line
## 2          version
## 3  SVN_revision
## 4  boost_version
## 5          genome
##
## 1 cuffdiff -p 10 -L WT,Peril -o /n/rinn_data1/seq/lgoff/Projects/BrainMap/data/diffs/Peril_vs_WT_Adult /n/rinn_data1/seq/lgoff/Projects/BrainMap/data/ar
## 2
## 3
## 4
## 5
```

# Peril KO vs WT (Embryonic)

This file shows the wt-v-ko comparison for Peril.

Cuff overview:

```
## CuffSet instance with:  
## 2 samples  
## 26754 genes  
## 77524 isoforms  
## 0 TSS  
## 23066 CDS  
## 0 promoters  
## 0 splicing  
## 19954 relCDS
```

## QC

### Dispersion

Dispersion plot for genes in cuff: (Overdispersion can lead to innacurate quants)

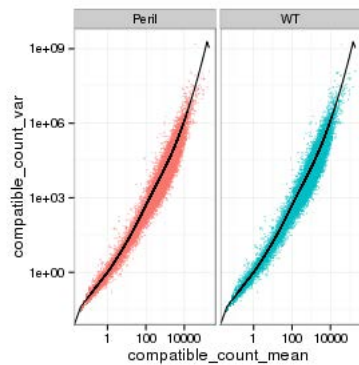

### Cross-replicate variability (fpkmSCVplot)

Differences in CV 2 can result in lower numbers of differentially expressed genes due to a higher degree of variability between replicate fpkm estimates.

Genes:

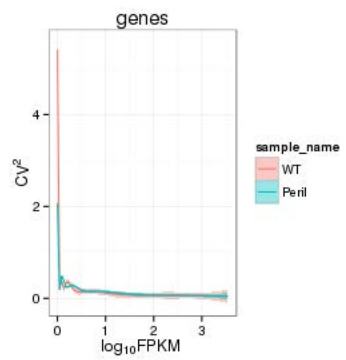

Isoforms:

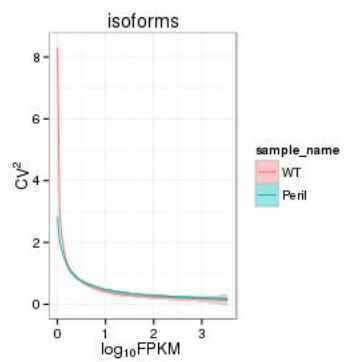

## MvA plot

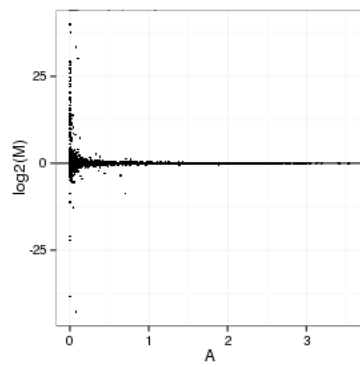

MvA plot counts

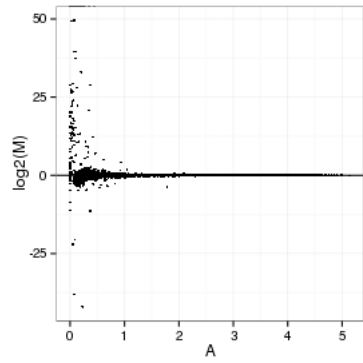

## Scatterplot matrix

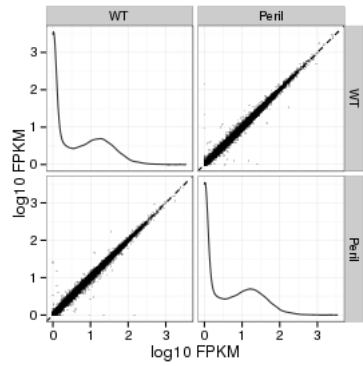

## Distributions

### Boxplots

Boxplot (genes)

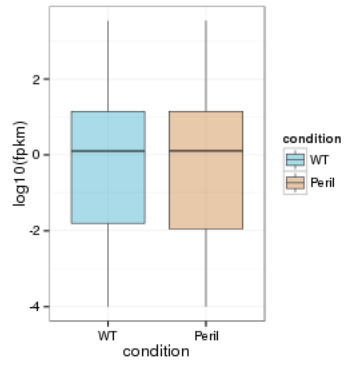

Boxplot (genes, replicates)

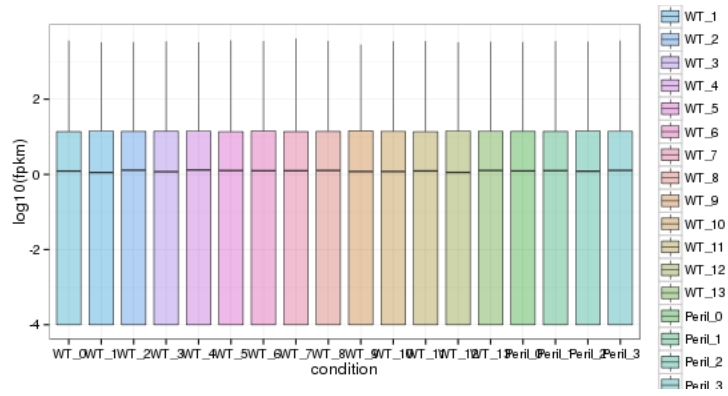

Boxplot (isoforms)

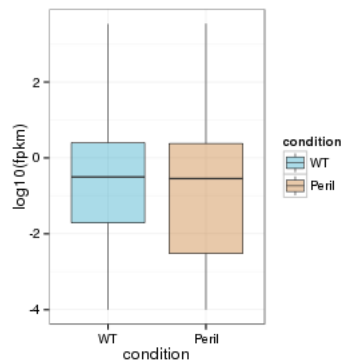

Boxplot (isoforms, replicates)

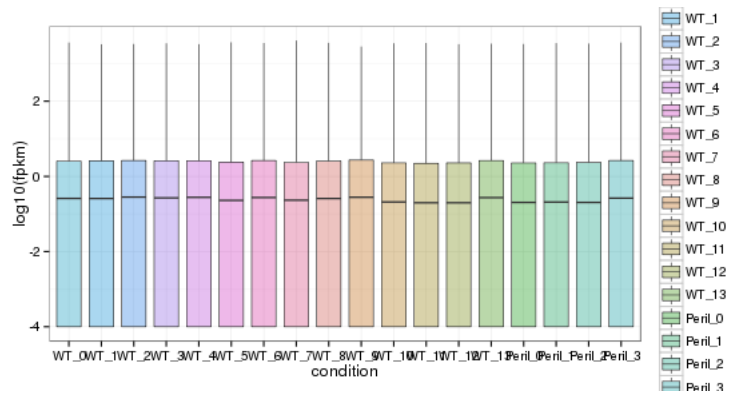

## Density

Density (genes)

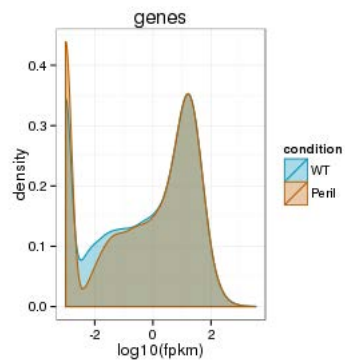

Density (genes, replicates)

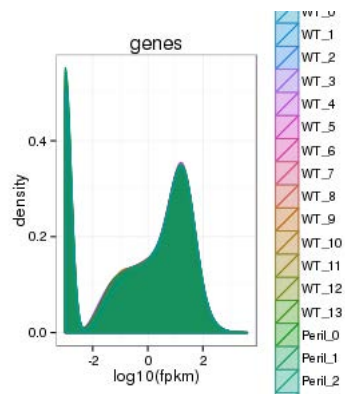

# Clustering

## Replicate Clusters

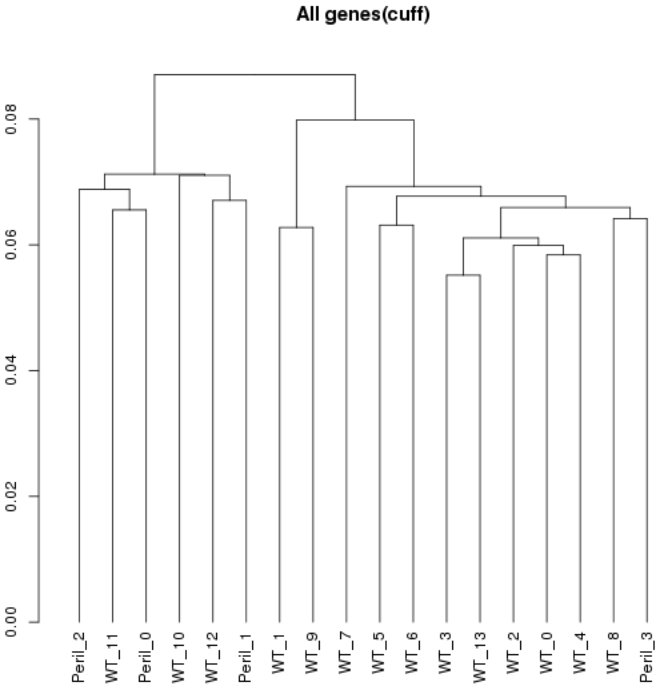

## NULL

## PCA (genes)





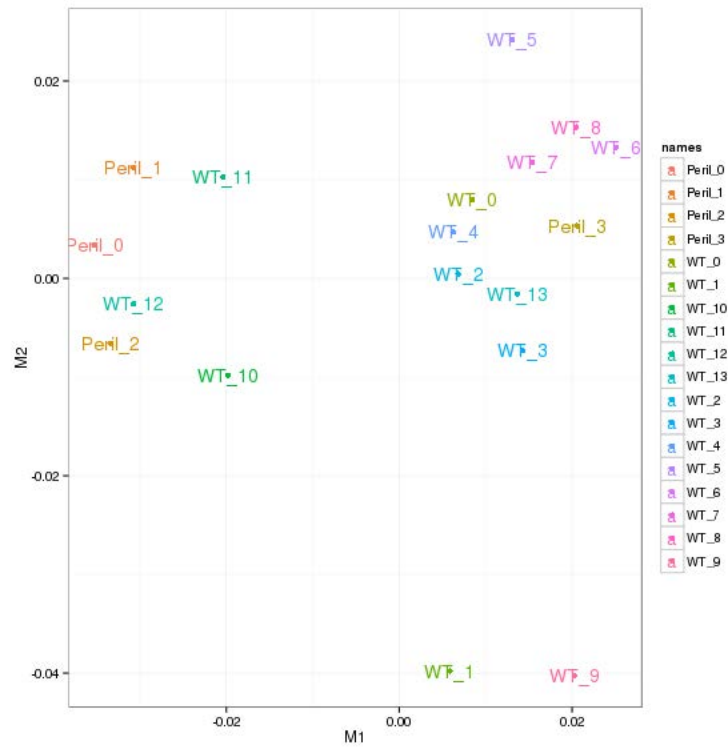

## KO assessment

Endogenous IncRNA expression

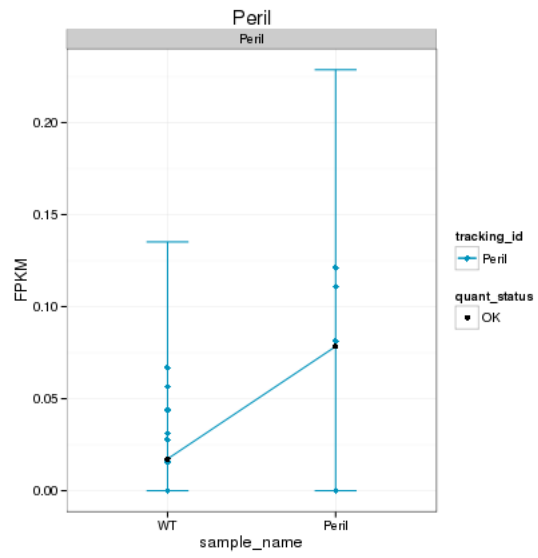

Endogenous expression of Peril isoforms:

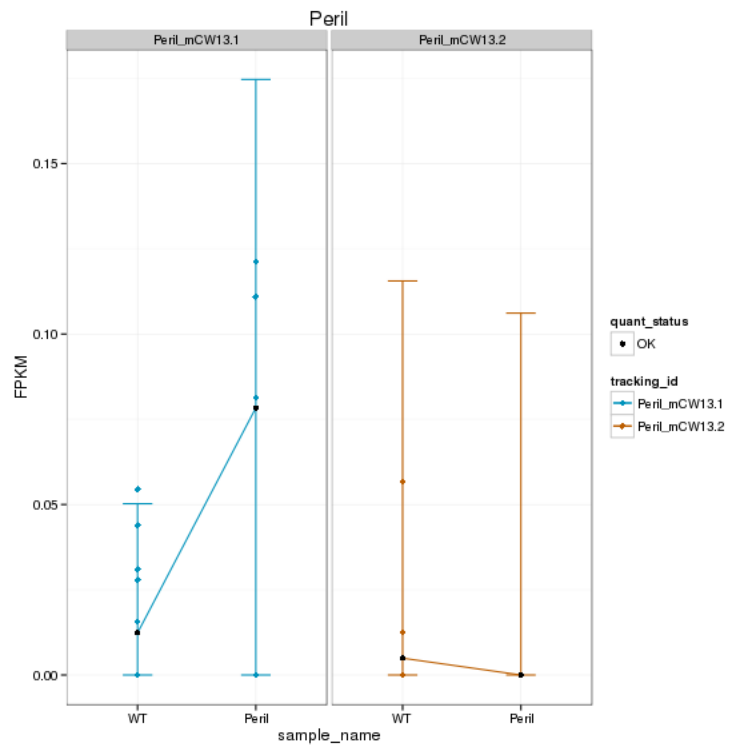

Barplot of gene expression:

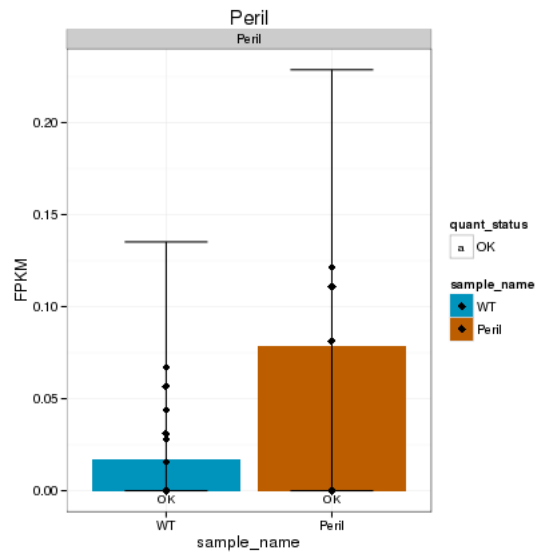

Barplot of isoform expression:

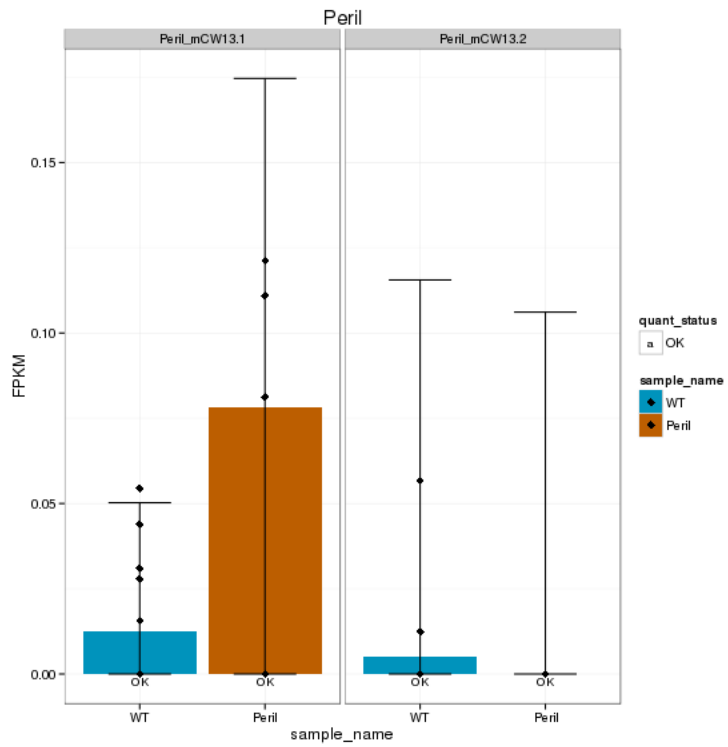

## LacZ expression

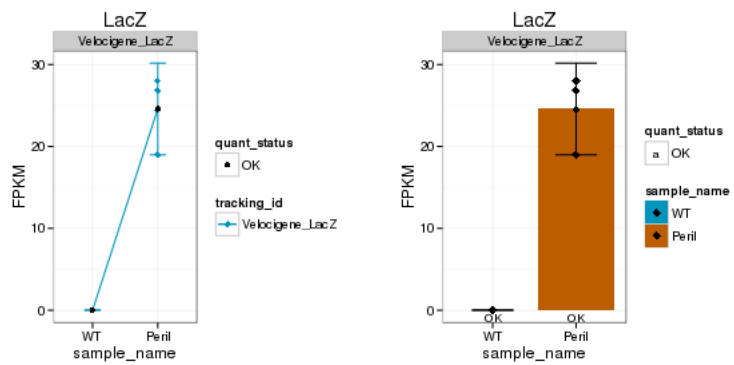

## Digital Genotyping (LacZ vs Endogenous lincRNA and Sex)

Eif2s3y is a y-expressed gene, Xist is an x-expressed gene Expression plot (endogenous linc, lacZ, Y-expressed gene):

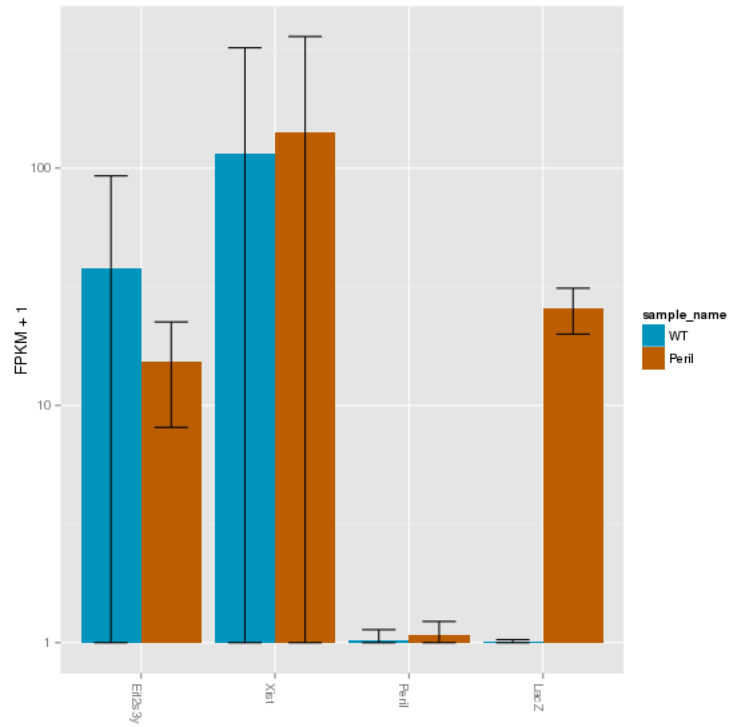

Expression heatmap:

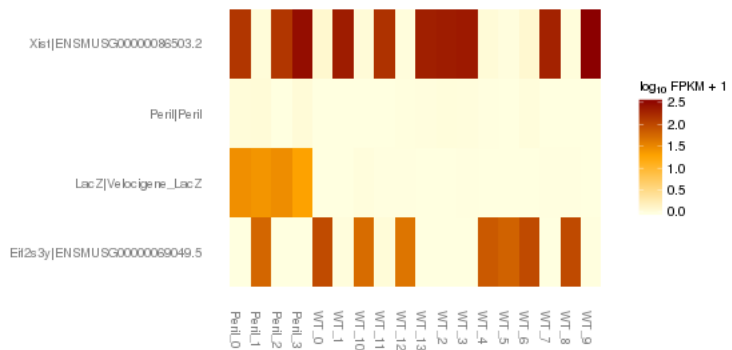

Track visualization

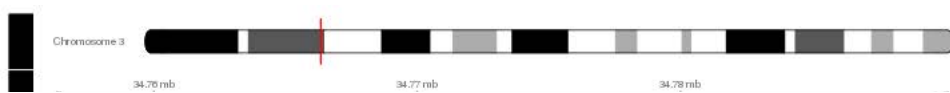

NO Region | Peri0 | Peri1 | Peri2 | Peri3 | Peri4 | Peri5 | Peri6 | Peri7 | Peri8 | Peri9 | Peri10 | Peri11 | Peri12 | Peri13 | Peri14 | Peri15 | Peri16 | Peri17 | Peri18 | Peri19 | Peri20 | Peri21 | Peri22 | Peri23 | Peri24 | Peri25 | Peri26 | Peri27 | Peri28 | Peri29 | Peri30 | Peri31 | Peri32 | Peri33 | Peri34 | Peri35 | Peri36 | Peri37 | Peri38 | Peri39 | Peri40 | Peri41 | Peri42 | Peri43 | Peri44 | Peri45 | Peri46 | Peri47 | Peri48 | Peri49 | Peri50 | Peri51 | Peri52 | Peri53 | Peri54 | Peri55 | Peri56 | Peri57 | Peri58 | Peri59 | Peri60 | Peri61 | Peri62 | Peri63 | Peri64 | Peri65 | Peri66 | Peri67 | Peri68 | Peri69 | Peri70 | Peri71 | Peri72 | Peri73 | Peri74 | Peri75 | Peri76 | Peri77 | Peri78 | Peri79 | Peri80 | Peri81 | Peri82 | Peri83 | Peri84 | Peri85 | Peri86 | Peri87 | Peri88 | Peri89 | Peri90 | Peri91 | Peri92 | Peri93 | Peri94 | Peri95 | Peri96 | Peri97 | Peri98 | Peri99

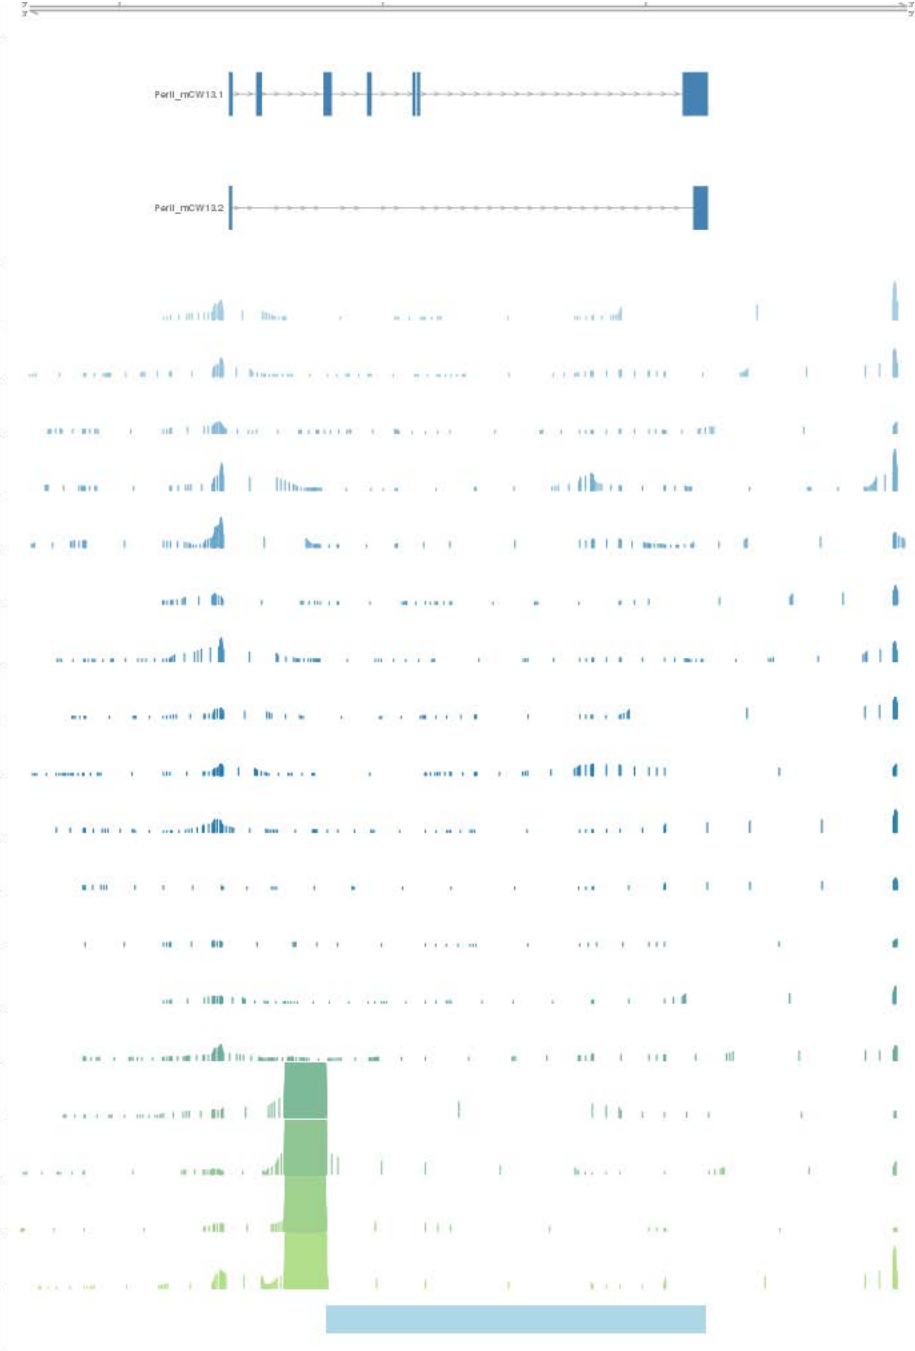

# Differential Analysis

## Differential Genes

There are 254 significantly differentially expressed genes. They are:

|    | geneAnnot\$gene_short_name |
|----|----------------------------|
| 1  | Ccnd2                      |
| 2  | Itga5                      |
| 3  | Gabra2                     |
| 4  | Col18a1                    |
| 5  | Col1a1                     |
| 6  | Phyhip                     |
| 7  | Ddr1                       |
| 8  | Aqp1                       |
| 9  | Pax3                       |
| 10 | Nes                        |
| 11 | Nid1                       |
| 12 | Hmox1                      |
| 13 | Osgep                      |
| 14 | Rplp1                      |
| 15 | Wnt3a                      |
| 16 | Odc1                       |
| 17 | Aldh1a2                    |
| 18 | Dennd6b                    |
| 19 | Celsr1                     |
| 20 | Sulf1                      |
| 21 | Anxa6                      |
| 22 | Slc16a10                   |
| 23 | Lrr1q1                     |
| 24 | Lama2                      |
| 25 | Ndufa12                    |
| 26 | Rfx4                       |
| 27 | Col6a2                     |
| 28 | Aebp1                      |
| 29 | Pomc                       |
| 30 | Galk1                      |
| 31 | Nxn                        |
| 32 | Ntn1                       |
| 33 | Amn                        |
| 34 | Nid2                       |
| 35 | Gdf10                      |
| 36 | Esd                        |
| 37 | Tnfrsf10b                  |



38 Psmb5  
39 Npr3  
40 Col14a1  
41 Wnt7b  
42 Myh9  
43 Plec  
  
44 Arhgap31  
45 Clic6  
46 Wnt1  
47 Krt18  
48 Dlx2  
49 Igf2r  
50 Gfra3  
51 H2-M5  
52 Pou4f3  
53 Lox  
54 Megf10  
55 Fbn2  
56 Pdgfrb  
57 Glc3c  
58 Cpt1a  
59 Slc18a2  
60 Rps24  
61 Podxl  
62 Col5a2  
63 Col3a1  
64 Igfbp5  
65 Fn1  
66 Ptma  
67 Lamc1  
68 Ptpn14  
69 Ddr2  
70 Lmx1a  
  
71 Gad2  
72 Col5a1  
73 Lamc3  
74 Hspa5  
75 Lhx6  
76 Notch1  
77 Lrp2  
78 Fbn1  
79 Cd82  
80 Tspan18

81 Syt13  
82 Mccc1  
83 Slc7a11  
84 Hsd3b6  
85 Notch2  
86 Vcam1  
87 Hadh  
88 Wls  
89 Tnc  
90 Svep1  
91 Stmn1  
92 Trp73  
93 Pdgfra  
94 Gm996  
95 Col1a2  
96 Ephb4  
97 Dlx5  
98 Lrig1  
99 Aldh111  
100 Plxnd1  
101 Emp1  
102 Dbx1  
103 Trpm1  
104 Hddc3  
105 Zkscan2  
106 Lyve1  
107 Heph  
108 Col4a5  
109 Plat  
110 Slit2  
111 Hsd11b2  
112 Itga11  
113 Gsta4  
114 Car12  
115 Smad3  
116 Lama1  
117 Tlr13  
118 Gria2  
119 Foxj1  
120 Tmem132c  
121 Scn10a  
122 Ptpn13  
123 Tdg

124 Prr7  
125 Fras1  
126 Arl4d  
127 Arx  
128 Ror1  
129 Ccl2  
130 Ccdc11  
131 Tgfb  
132 Cox8a  
133 Colec12  
134 Lum  
135 C1ql2  
136 Wnt8b  
137 Frem2  
138 Atp11b  
139 Vstm2l  
140 Notch3  
141 Spon1  
142 Satb2  
143 Akap12  
144 Atp5l  
145 Itpkb  
146 Anpep  
147 Rbpj  
148 Pcsk1n  
149 Igfbp2  
150 Kcne2  
151 Bmf  
  
152 Thbs1  
153 Abcb1a  
  
154 Ildr2  
155 C1qtnf4  
156 Abhd4  
157 Npnt  
158 Fzd7  
159 Ccdc8  
160 Arhgap11a  
161 Htr2c  
162 Prepl  
163 Nlrp5-ps  
164 Dlx1  
165 Rassf4  
166 Dmrt3

167 Lor  
168 A030009H04Rik  
169 Tmem145  
170 Wfikkn2  
171 Snhg11  
172 Gm9493  
173 Acp1  
174 Cnpy1  
175 Basp1  
176 Olig1  
177 Scand1  
178 Fat4  
179 Tmem164  
180 Adamts12  
181 Rps8  
182 Pirt  
183 Shisa3  
184 Pla2g4e  
185 Gja1  
186 Rspo2  
187 Pfdn4  
188 Hbb-y  
189 Hbb-bh1  
190 Dnah6  
191 Lamb2  
192 Yap1  
193 Sh3pxd2a  
194 Hba-x  
195 Dach1  
196 Myh8  
197 Col8a2  
198 Pgpep1  
199 Slit3  
200 Cd248  
201 Kdm5d  
202 Gulp1  
203 Hist3h2ba  
204 Gm5148  
205 Capn11  
206 Sclt1  
207 Hydin  
208 Dcc  
209 Cdh3

210 Trank1  
211 Otof  
212 Ldha  
213 Cyp26b1  
214 Col23a1  
215 Scn1a  
216 Cldn9  
217 Lgals1  
218 Slc4a5  
219 Flnc  
220 Sp9  
221 Ddx3y  
222 Ahnak  
223 Hba-a2  
224 Fat1  
225 Ccnd1  
226 Serpinh1  
227 Gm10282  
228 Gm1673  
229 Gad1  
230 Jund  
231 Ppia  
232 Fam84b  
233 Gm7292  
234 Drc1  
235 2410018L13Rik  
236 Wdfy1  
237 Hbb-bt  
238 Nynrin  
239 Ywhaq  
240 Fzd10  
241 Pisd-ps1  
242 Gm14204  
243 Ier5l  
244 Dlx6os1  
245 Pou3f1  
246 Ccdc85b  
247 Gm21781  
248 Gm6472  
249 Dynl1f  
250 Lhx8  
251 A330076H08Rik  
252 4930480K23Rik

253 A930011O12Rik

254 Gm27000

## Matrix of gene significant differences between conditions

(skip for Brainmap wt-v-ko comparisons)

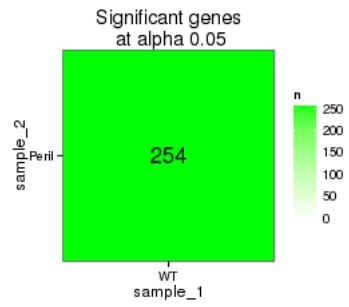

## Significant gene expression differences between conditions

Expression plot (genes):(turned off)

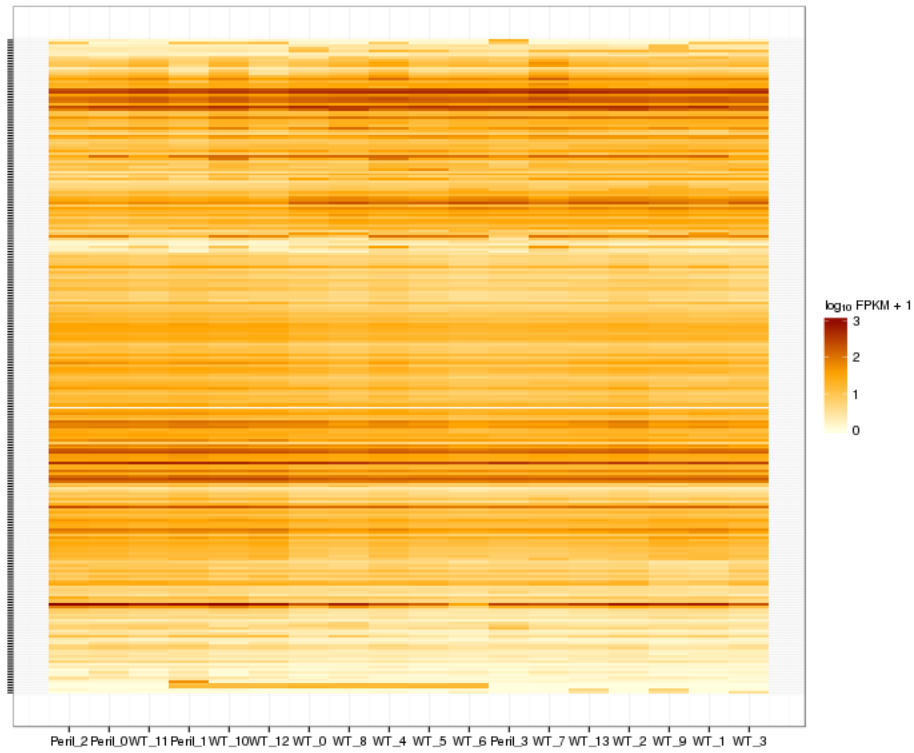

Significant genes with expression >50fpm (any condition):(turned off)

An individual look at each of the highly expressed significantly differentially regulated genes: (eval=false for first pass)

### Expression-level/significance relationship

Scatter plot of significant genes only:

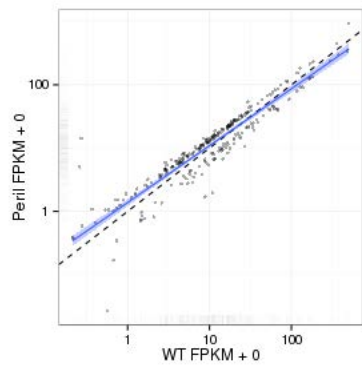

Volcano Plot

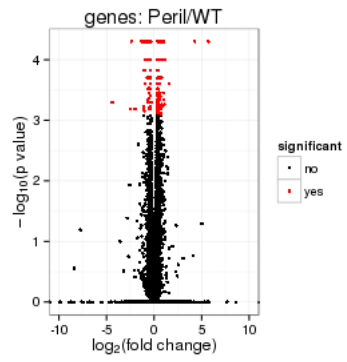

Volcano plot with significant genes only:

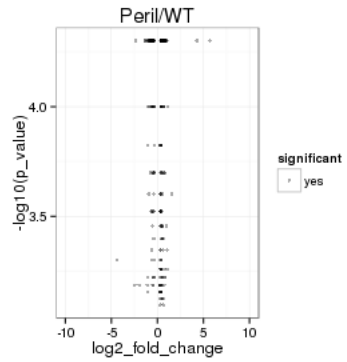

FoldChange Heatmap



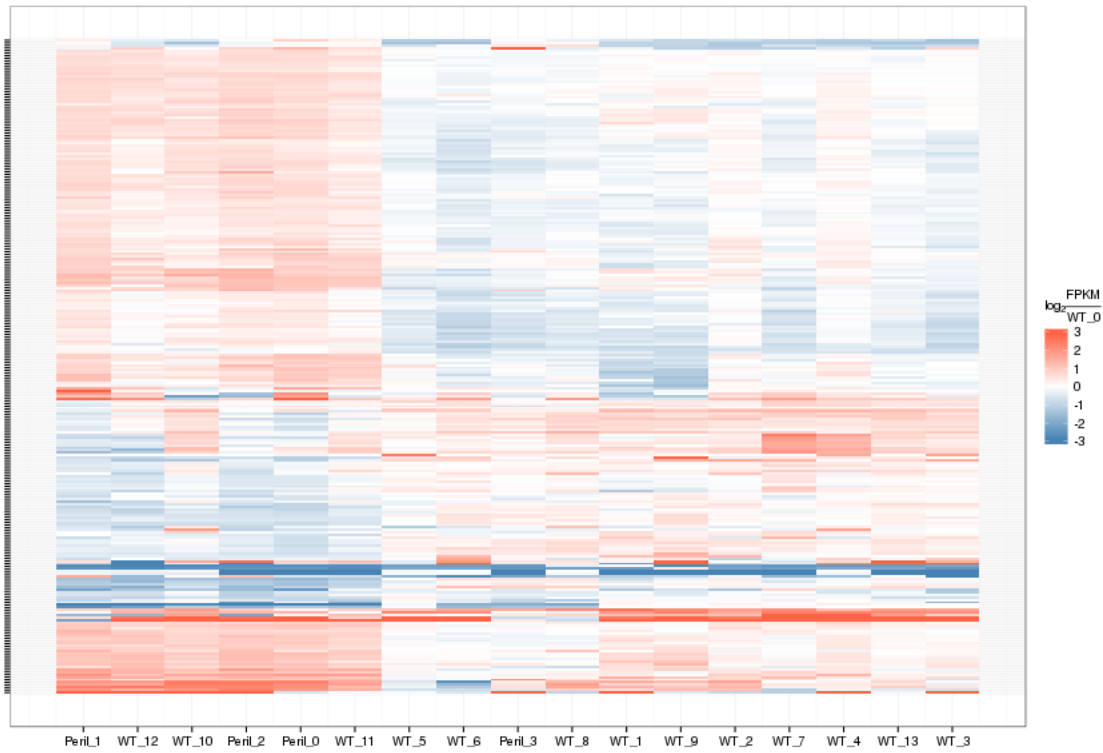

## Differential Splicing

### Differential Isoforms between conditions

Per isoform difference between conditions:

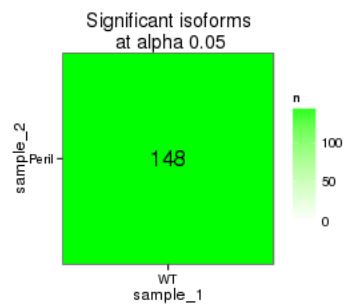

These isoforms are:

**isoAnnot\$gene\_short\_name**

- 1 Ccnd2
- 2 Gabra2
- 3 Col18a1
- 4 Col1a1
- 5 Aqp1
- 6 Nes
- 7 Nid1
- 8 Hmox1
- 9 Rplp1
  
- 10 Odc1
- 11 Cad
- 12 Lama5
- 13 Sulf1
- 14 Slc16a10
- 15 Lrriq1
- 16 Lama2
- 17 Gm872
- 18 Ndufa12
- 19 Pomc
- 20 Mrc2
- 21 Galk1
- 22 Nxn
- 23 Ntn1
- 24 Tnfrsf10b
- 25 Psm5
- 26 Npr3
- 27 Col14a1
- 28 Zbtb20
- 29 Arhgap31
- 30 Adamts1
- 31 Clic6
- 32 Dlx2
- 33 Igf2r
- 34 Svil
- 35 H2-M5
- 36 Pou4f3
  
- 37 Fbn2
- 38 Pdgfra
- 39 Gldc
- 40 Slc18a2

41 Podxl  
42 Col5a2  
43 Col3a1  
44 Igfbp5  
45 Fn1  
46 Ptma  
47 Lamc1  
48 Lmx1a  
49 Gad2  
50 Col5a1  
51 Notch1  
52 Lrp2  
53 Fbn1  
54 Tspan18  
55 Syt13  
56 Rrbp1  
57 Mccc1  
58 Notch2  
59 Vcam1  
60 Svep1  
61 Hspg2  
62 Rspo1  
63 Trp73  
64 Col1a2  
  
65 Dlx5  
66 Aldh1l1  
67 Smad3  
68 Lama1  
69 Foxj1  
70 Tmem132c  
71 Ptpn13  
72 Prr7  
73 Fras1  
74 Atr4d  
75 Arx  
76 Cox8a  
77 Colec12  
78 Lum  
79 Wnt8b  
80 Frem2  
81 D4Wsu53e  
82 Notch3  
83 Spon1

84 Akap12  
85 Pcsk1n  
86 Kcne2  
87 Thbs1  
88 C1qtnf4  
89 Ccdc8  
90 Arhgap11a  
91 Prelp  
92 Nlrp5-ps  
93 Dix1  
94 Rassf4  
95 Dmrt3  
96 Reln  
97 Lor  
98 Wfikkn2  
99 Snhg11  
100 Gm9493  
101 Basp1  
102 Olig1  
103 Fat4  
104 Adamts12  
105 Rps8  
106 Col6a3  
107 Pla2g4e  
108 Rspo2  
109 Hbb-y  
110 Hbb-bs  
111 Ezr  
112 Lamb2  
113 Glis3  
114 Yap1  
115 Zfp771  
116 Hba-x  
117 Myh8  
  
118 Col8a2  
119 Pgpep1  
  
120 Ncoa4  
121 Kdm5d  
122 Hist3h2ba  
123 Hydin  
124 Trank1  
125 Finc  
126 Sp9

127 Ddx3y  
128 Gpr98  
129 Ahnak  
130 Fat1  
131 Serpinh1  
132 Gm10282  
133 Jund  
134 Fam84b  
135 Drc1  
136 Hbb-bt  
137 Col22a1  
138 Fzd10  
139 Ier5l  
140 Dlx6os1  
141 Pou3f1  
142 Ccdc85b  
143 Gm6472  
144 4930480K23Rik  
145 Rmst  
146 A930011O12Rik  
147 Gm27000

Gene-level DE isoform heatmap

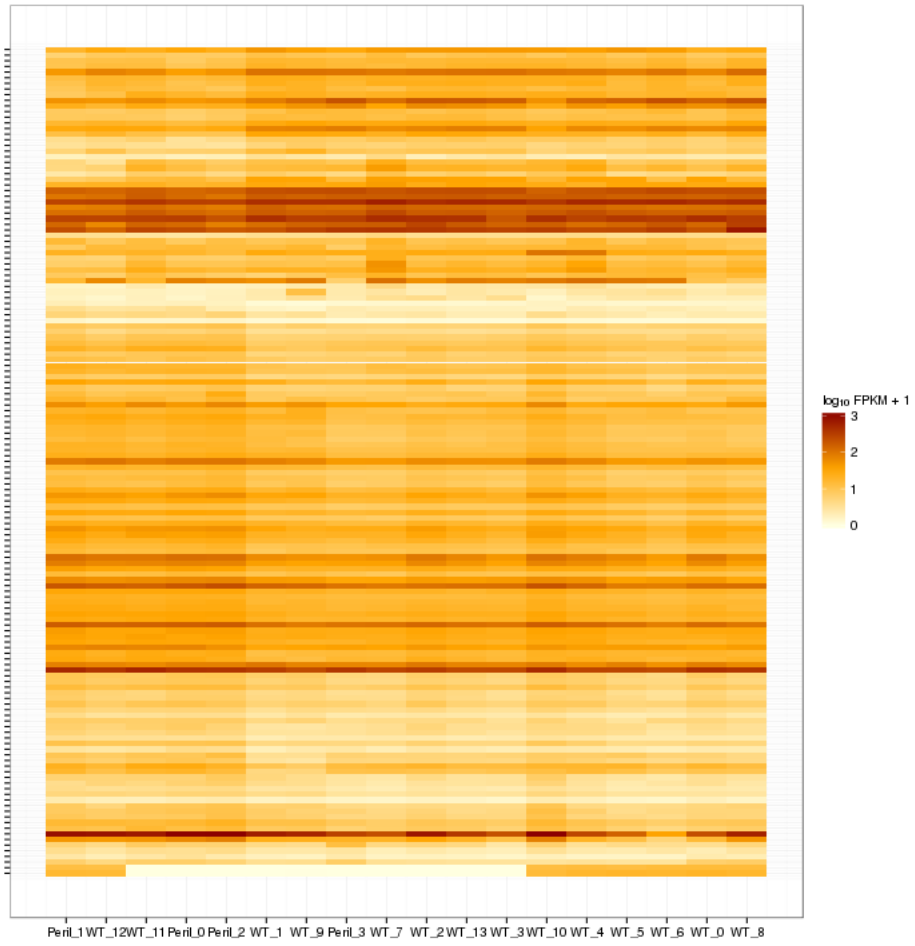

Isoform foldchange heatmap by isoform:

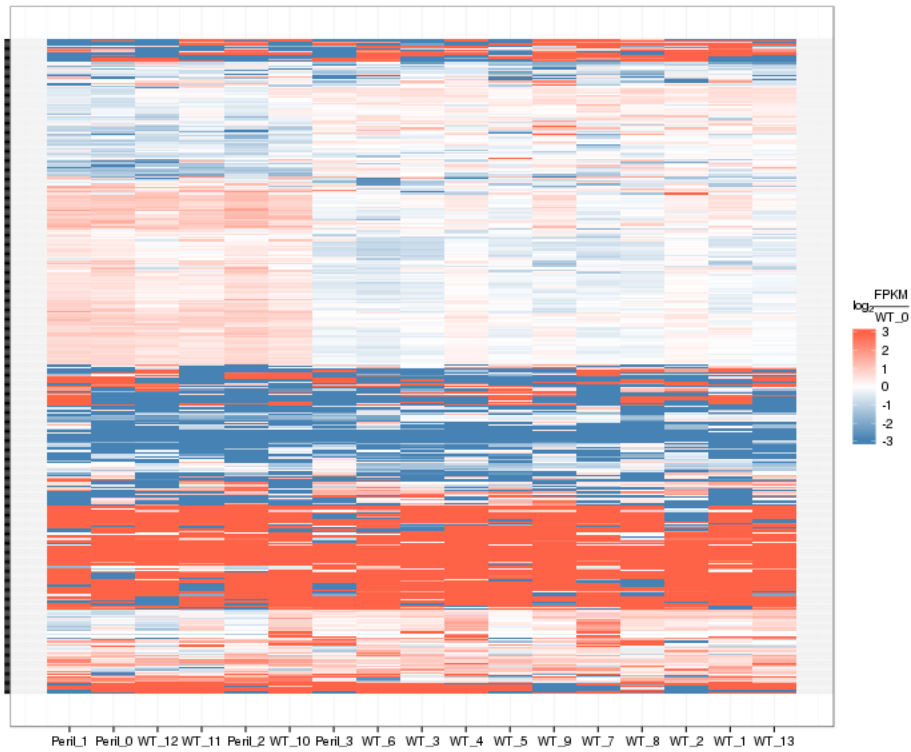

## Differential Splicing between conditions

(eval false for first pass)

Per condition differences in isoforms (Does gene have diff piechart between conditions?)

These genes are:

Splicing heatmap by isoform:

Splicing heatmap by gene

The following are significantly differentially spliced genes (relative portion of isoform per condition):

## Gene/Pathway Analysis

### GSEA

Enrichment and zscores are calculated based on expression in KO vs WT (fpkmKO/fpkmWT), so genes that are down regulated in KO are shown in blue, while upregulation is shown in red.

KOWT Blue = down in KO Red = Up in KO

Biocarta enrichment:

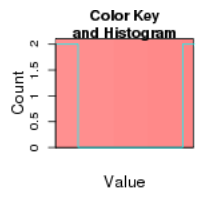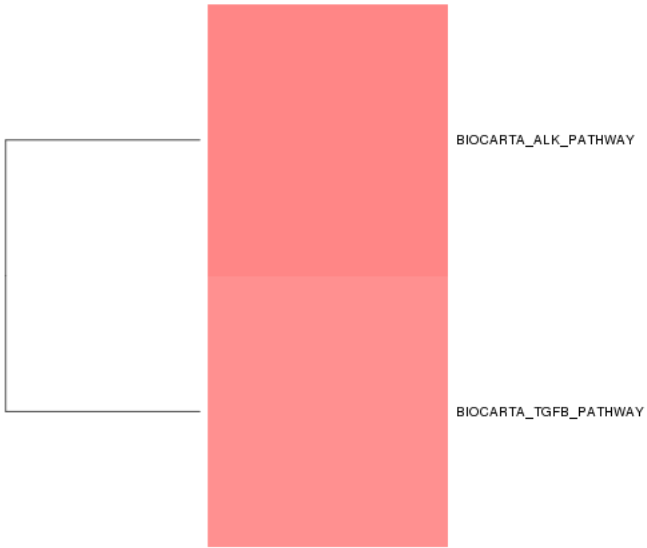

Biocarta zscore:



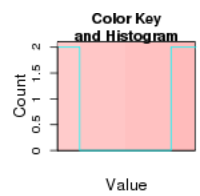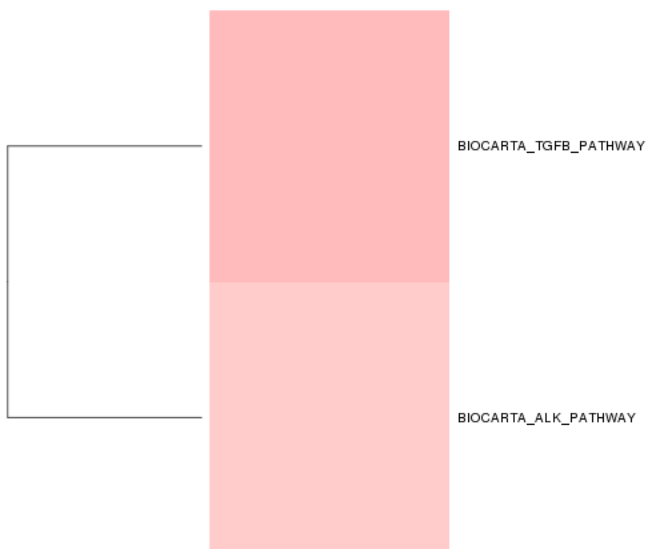

Reactome enrichment:

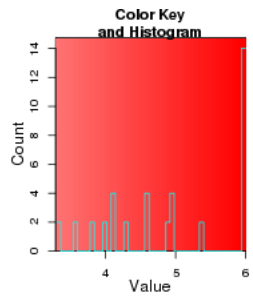

\_\_\_\_\_

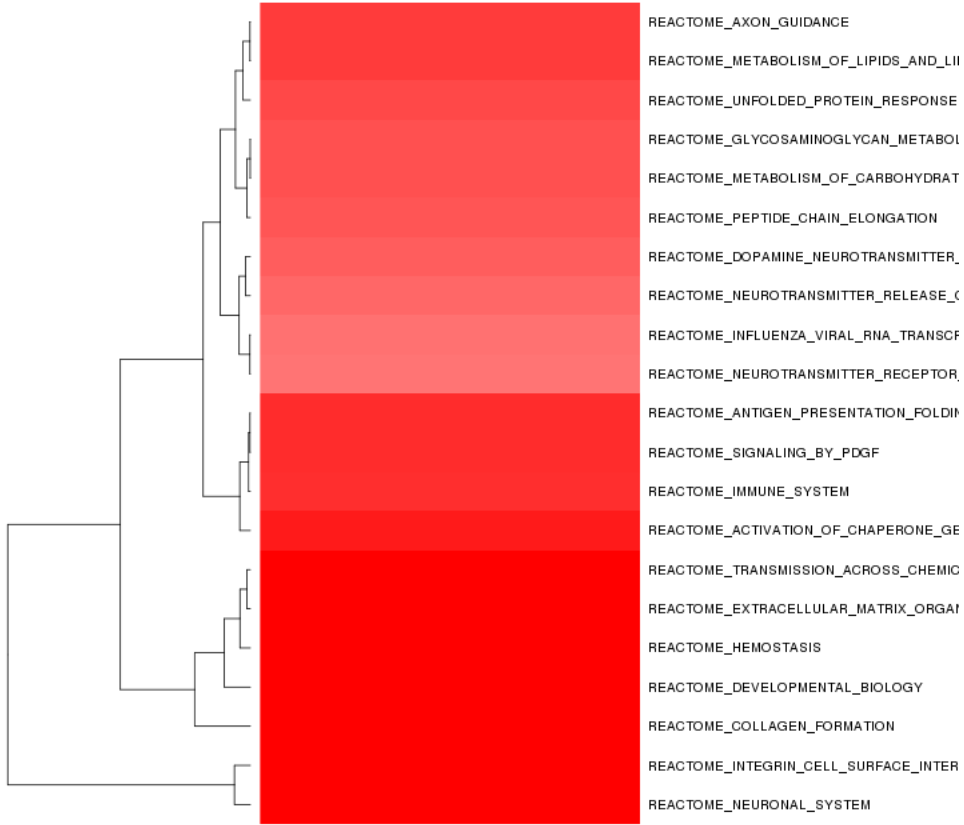

Reactome zscore:

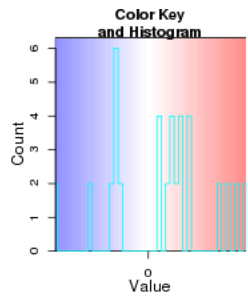

\_\_\_\_\_

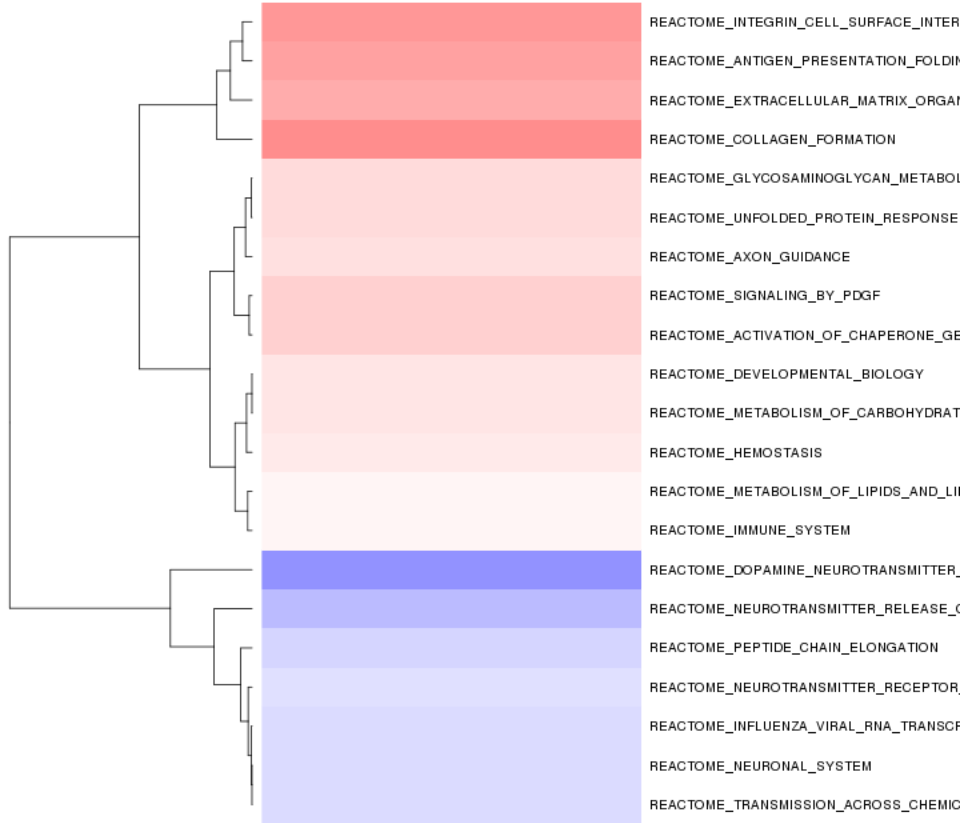

Kegg enrichment:

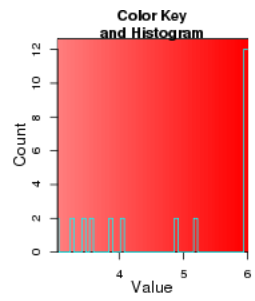

\_\_\_\_\_

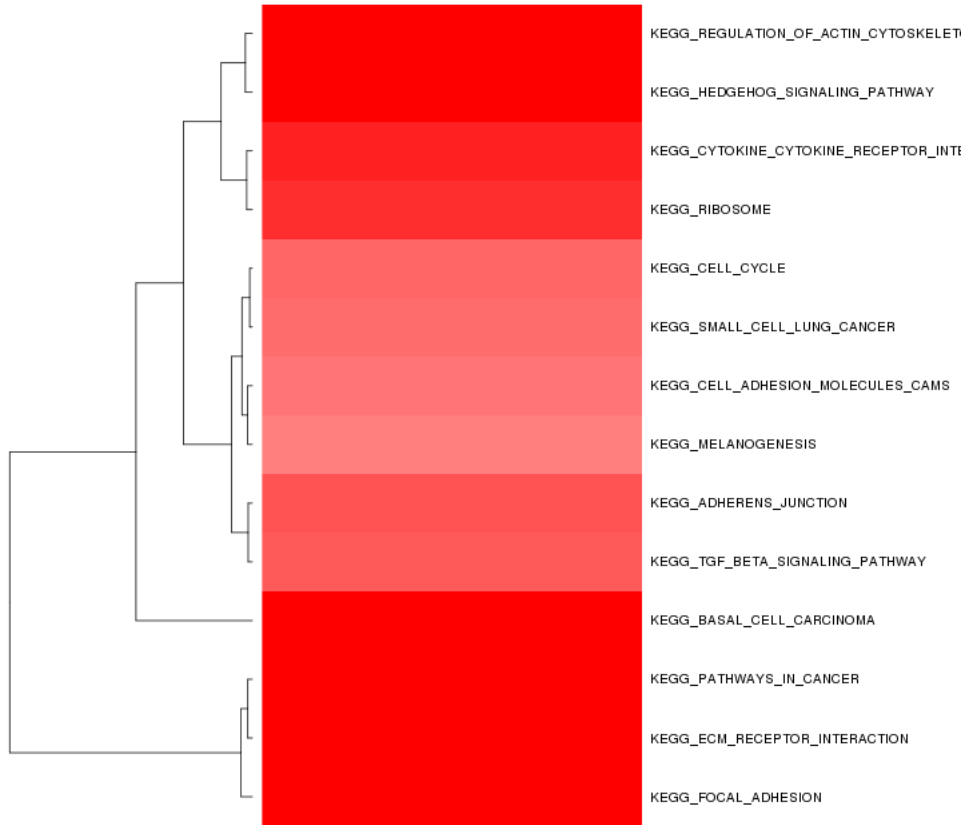

Kegg zscore:

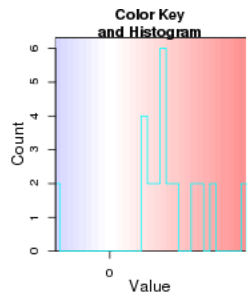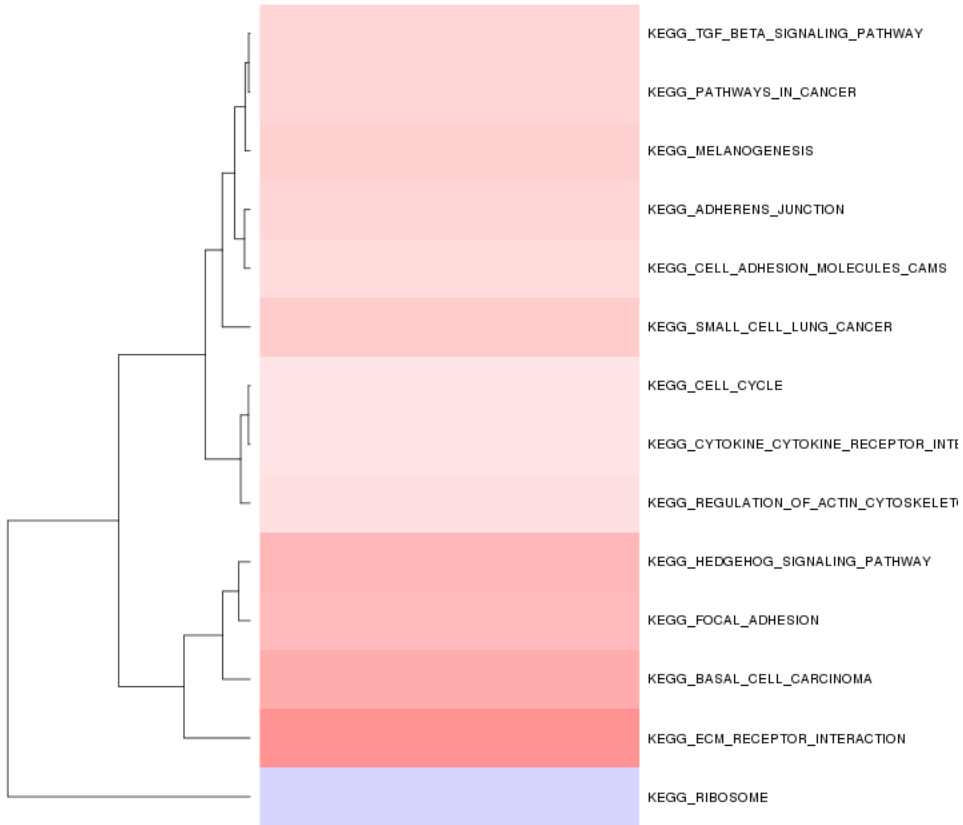

Interneuron enrichment:

## Error: argument is of length zero

Interneuron zscore:

## Error: incorrect number of dimensions

```
## Error: object 'x_ordered' not found
```

```
## Error: error in evaluating the argument 'x' in selecting a method for function 'as.matrix': Error: object 'x_ordered' not found
```

```
## Error: object 'x_ordered' not found
```

Oncogene enrichment:

```
## Error: subscript out of bounds
```

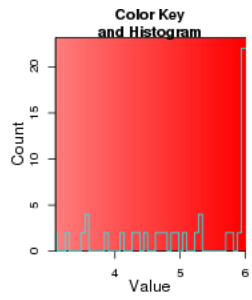

\_\_\_\_\_

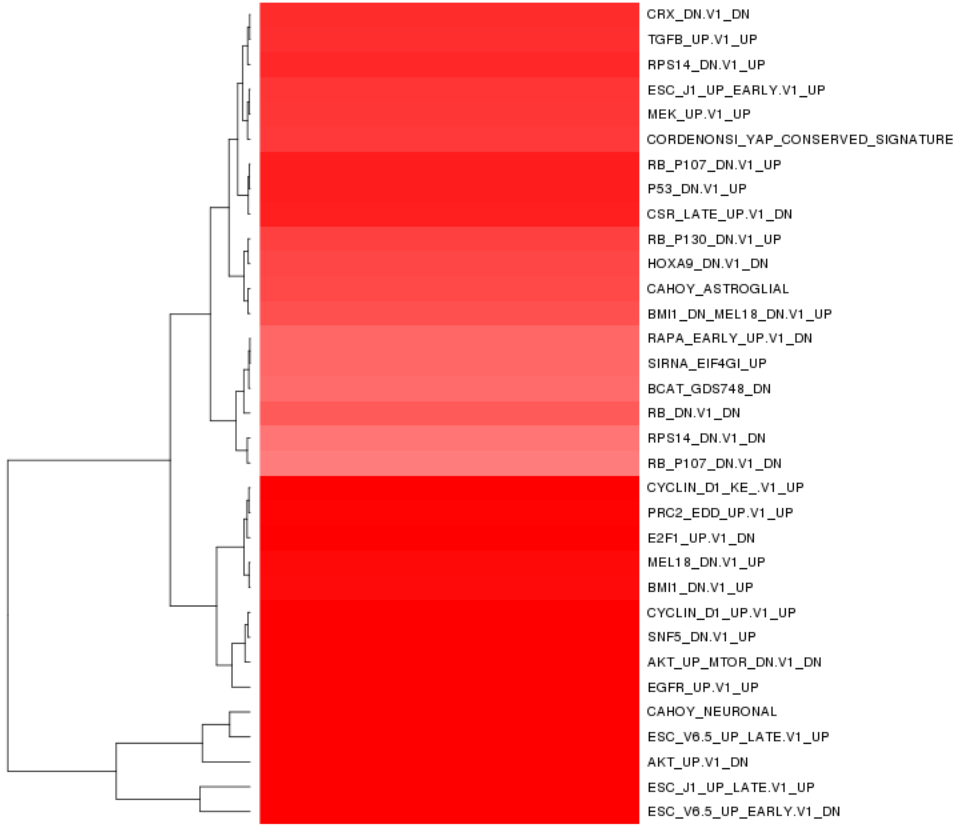

Oncogene zscore:

## Error: subscript out of bounds

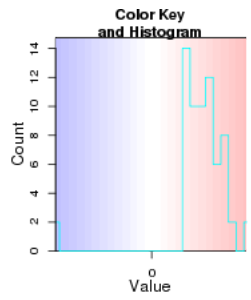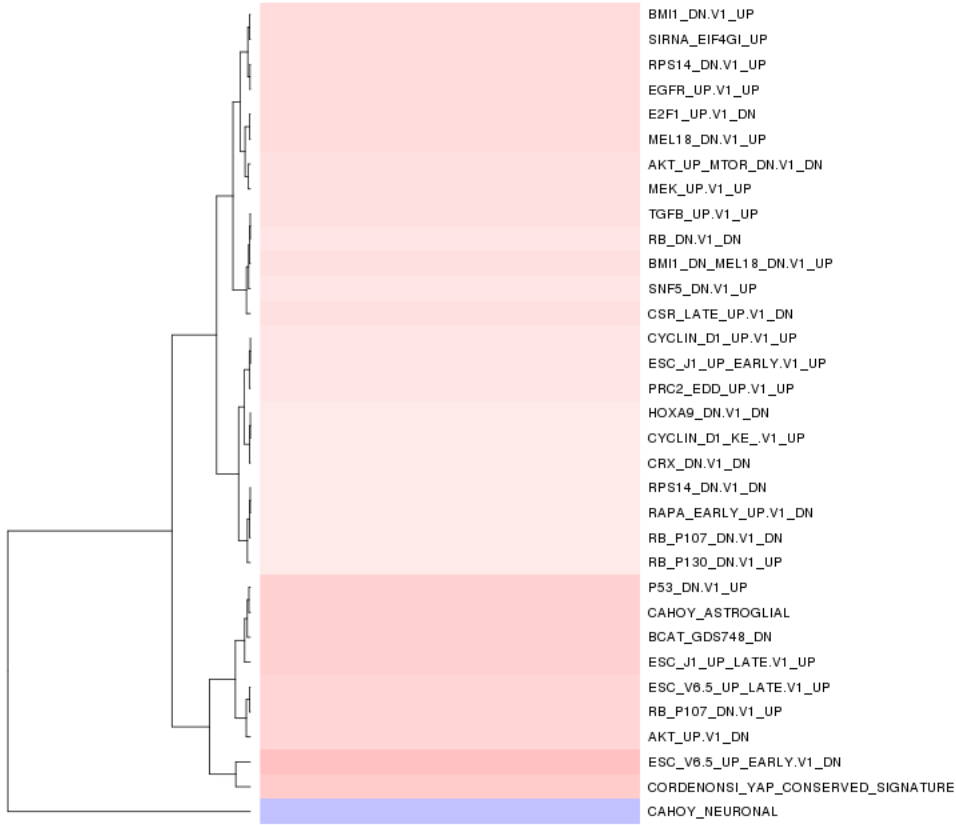

Immuno enrichment:



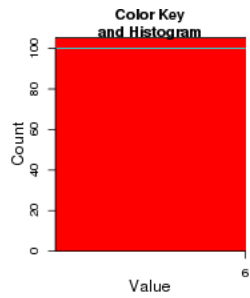

\_\_\_\_\_

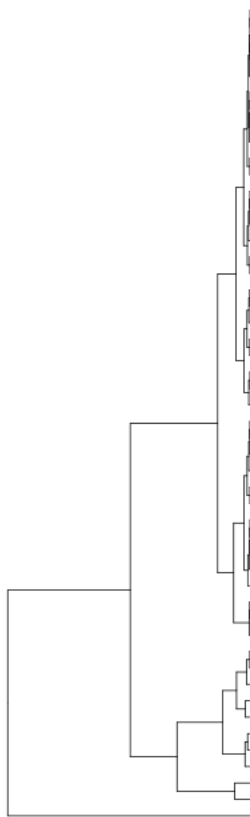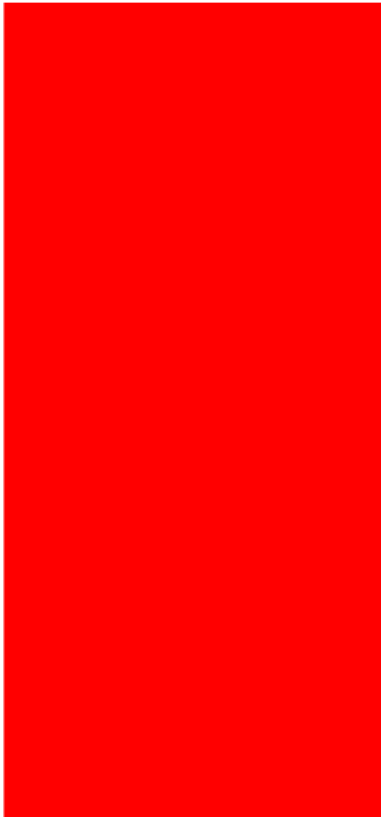

GSE27786\_BCELL\_VS\_NKCELL\_DN  
 GSE20715\_0H\_VS\_24H\_OZONE\_TLR4\_KO\_LUN  
 GSE24142\_DN2\_VS\_DN3\_THYMOCYTE\_FETAL  
 GSE24142\_EARLY\_THYMIC\_PROGENITOR\_VS\_  
 GSE3337\_4H\_VS\_16H\_IFNG\_IN\_CD8POS\_DC\_I  
 GSE20715\_0H\_VS\_48H\_OZONE\_LUNG\_DN  
 KAECH\_NAIVE\_VS\_DAY8\_EFF\_CD8\_TCELL\_DN  
 GSE6269\_E\_COLI\_VS\_STREP\_AUREUS\_INF\_P  
 GSE2706\_2H\_VS\_8H\_R848\_STIM\_DC\_UP  
 GSE22886\_NAIVE\_TCELL\_VS\_DC\_DN  
 GSE300\_L\_DONOVANI\_VS\_B\_MALAYI\_HIGH\_D  
 GSE30962\_PRIMARY\_VS\_SECONDARY\_ACUTE  
 GSE17721\_CPG\_VS\_GARDIQUIMOD\_8H\_BMDM  
 GSE1460\_INTRATHYMIC\_T\_PROGENITOR\_VS\_  
 GSE15930\_NAIVE\_VS\_72H\_IN\_VITRO\_STIM\_IL  
 GSE29618\_MONOCYTE\_VS\_PDC\_UP  
 GSE24634\_TREG\_VS\_TCONV\_POST\_DAY10\_IL  
 GSE3982\_DC\_VS\_EFF\_MEMORY\_CD4\_TCELL\_  
 GSE1460\_CD4\_THYMOCYTE\_VS\_THYMIC\_STR  
 GSE24026\_PDI\_LIGATION\_VS\_CTRL\_IN\_ACT\_  
 GSE22886\_NAIVE\_BCELL\_VS\_MONOCYTE\_DN  
 KAECH\_NAIVE\_VS\_MEMORY\_CD8\_TCELL\_DN  
 GSE22886\_NAIVE\_BCELL\_VS\_BLOOD\_PLASM  
 GSE9988\_LPS\_VS\_VEHICLE\_TREATED\_MONO  
 GSE14000\_4H\_VS\_16H\_LPS\_DC\_TRANSLATEC  
 GSE17721\_CTRL\_VS\_LPS\_12H\_BMDM\_UP  
 GSE24634\_IL4\_VS\_CTRL\_TREATED\_NAIVE\_CF  
 GSE9988\_ANTI\_TREM1\_VS\_VEHICLE\_TREATEI  
 GSE300\_HIGH\_DOSE\_B\_MALAYI\_VS\_M\_TUBEI  
 GSE9650\_EFFECTOR\_VS\_MEMORY\_CD8\_TCEL  
 GSE10325\_CD4\_TCELL\_VS\_MYELOID\_DN  
 GOLDRATH\_NAIVE\_VS\_EFF\_CD8\_TCELL\_DN  
 GSE9650\_NAIVE\_VS\_EFF\_CD8\_TCELL\_DN  
 GSE24142\_EARLY\_THYMIC\_PROGENITOR\_VS\_  
 GSE6269\_HEALTHY\_VS\_STREP\_PNEUMO\_INF  
 GSE29618\_BCELL\_VS\_MONOCYTE\_DAY7\_FLU  
 GSE15750\_DAY8\_VS\_DAY10\_TRAF6KO\_EFF\_C  
 GSE24634\_IL4\_VS\_CTRL\_TREATED\_NAIVE\_CF  
 GSE24634\_TREG\_VS\_TCONV\_POST\_DAY7\_IL4  
 GSE24142\_DN2\_VS\_DN3\_THYMOCYTE\_UP  
 GSE10325\_LUPUS\_CD4\_TCELL\_VS\_LUPUS\_M  
 GSE15767\_MED\_VS\_SCS\_MAC\_LN\_UP  
 GSE9988\_ANTI\_TREM1\_AND\_LPS\_VS\_VEHICLI  
 GSE24142\_EARLY\_THYMIC\_PROGENITOR\_VS\_  
 GSE24634\_TEFF\_VS\_TCONV\_DAY7\_IN\_CULTU  
 GSE29614\_CTRL\_VS\_DAY7\_TIV\_FLU\_VACCINE  
 GSE24142\_EARLY\_THYMIC\_PROGENITOR\_VS\_  
 GSE10325\_LUPUS\_BCELL\_VS\_LUPUS\_MYELO  
 GSE24634\_TEFF\_VS\_TCONV\_DAY10\_IN\_CULTI  
 GSE24634\_TREG\_VS\_TCONV\_POST\_DAY10\_IL

Immuno zscore:

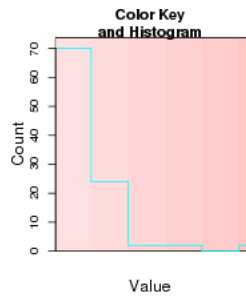

\_\_\_\_\_

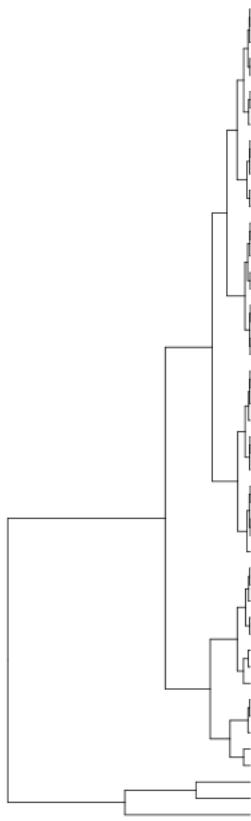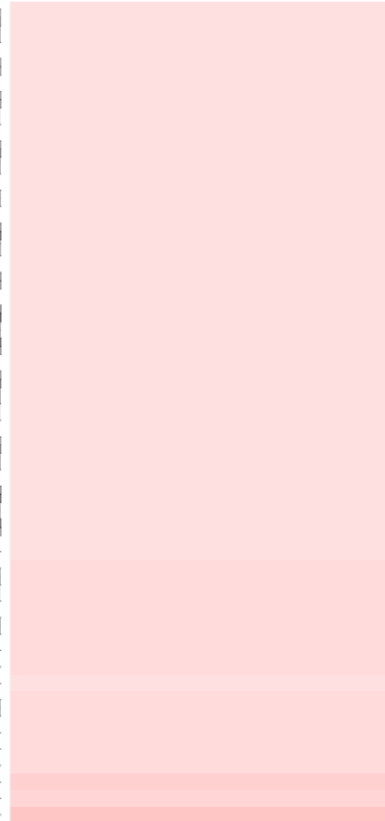

GSE13485\_DAY7\_VS\_DAY21\_YF17D\_VACCINE  
 GSE20715\_WT\_VS\_TLR4\_KO\_24H\_OZONE\_LUI  
 GSE24034\_IL4\_VS\_CTRL\_TREATED\_NAIVE\_CC  
 GSE24142\_DN2\_VS\_DN3\_THYMOCYTE\_UP  
 GSE22880\_DC\_VS\_MONOCYTE\_UP  
 GSE2706\_UNSTIM\_VS\_8H\_R848\_DC\_UP  
 GSE0209\_HEALTY\_VS\_STREP\_PNEUMO\_INF  
 GSE24142\_EARLY\_THYMIC\_PROGENITOR\_VS\_  
 GSE3982\_DC\_VS\_BCELL\_UP  
 GSE7852\_THYMUS\_VS\_FAT\_TCONV\_DN  
 GSE24034\_IL4\_VS\_CTRL\_TREATED\_NAIVE\_CC  
 GSE3337\_4H\_VS\_16H\_IFNG\_IN\_CD8POS\_DC\_I  
 GSE20715\_0H\_VS\_24H\_OZONE\_TLR4\_KO\_LUI  
 GSE22880\_NAIVE\_BCELL\_VS\_MONOCYTE\_DN  
 GSE29018\_MONOCYTE\_VS\_MDC\_DAY7\_FLU\_V  
 GSE29018\_BCELL\_VS\_MONOCYTE\_DAY7\_FLU  
 GSE24034\_TREG\_VS\_TCONV\_POST\_DAY7\_IL4  
 GSE10325\_BCELL\_VS\_MYELOID\_DN  
 GSE9050\_NAIVE\_VS\_EFF\_CD8\_TCELL\_DN  
 GSE3982\_DC\_VS\_CENT\_MEMORY\_CD4\_TCELL  
 GSE29014\_CTRL\_VS\_DAY7\_TIV\_FLU\_VACCINE  
 GSE15767\_MED\_VS\_SCS\_MAC\_LN\_UP  
 GSE9988\_ANTI\_TREM1\_VS\_VEHICLE\_TREATEI  
 GSE24142\_ADULT\_VS\_FETAL\_DN2\_THYMOCY  
 GSE360\_L\_DONOVANL\_VS\_B\_MALAYL\_HIGH\_D  
 GSE20715\_0H\_VS\_48H\_OZONE\_LUNG\_DN  
 GSE17721\_0.5H\_VS\_24H\_CPG\_BMDM\_DN  
 KAECH\_NAIVE\_VS\_DAY8\_EFF\_CD8\_TCELL\_DN  
 GSE24034\_IL4\_VS\_CTRL\_TREATED\_NAIVE\_CC  
 GOLDRATH\_NAIVE\_VS\_MEMORY\_CD8\_TCELL  
 KAECH\_NAIVE\_VS\_DAY15\_EFF\_CD8\_TCELL\_D  
 GSE24142\_EARLY\_THYMIC\_PROGENITOR\_VS\_  
 GSE1480\_DP\_THYMOCYTE\_VS\_THYMIC\_STRO  
 GSE9988\_ANTI\_TREM1\_AND\_LPS\_VS\_VEHICLI  
 GSE29018\_MONOCYTE\_VS\_MDC\_UP  
 GSE2706\_2H\_VS\_8H\_R848\_STIM\_DC\_UP  
 GSE3982\_DC\_VS\_EFF\_MEMORY\_CD4\_TCELL  
 GSE10325\_LUPUS\_CD4\_TCELL\_VS\_LUPUS\_M  
 GSE1480\_CD4\_THYMOCYTE\_VS\_THYMIC\_STR  
 GSE29018\_MONOCYTE\_VS\_PDC\_DAY7\_FLU\_V  
 GSE0209\_E\_COLI\_VS\_STREP\_AUREUS\_INF\_P  
 GSE3337\_CTRL\_VS\_16H\_IFNG\_IN\_CD8POS\_DX  
 GSE1480\_INTRATHYMIC\_T\_PROGENITOR\_VS\_  
 GSE24142\_EARLY\_THYMIC\_PROGENITOR\_VS\_  
 GSE24034\_TEFF\_VS\_TCONV\_DAY10\_IN\_CULTI  
 GSE29018\_MONOCYTE\_VS\_PDC\_UP  
 GSE14000\_4H\_VS\_16H\_LPS\_DC\_TRANSLATEE  
 GSE10325\_LUPUS\_BCELL\_VS\_LUPUS\_MYELO  
 GSE24034\_TEFF\_VS\_TCONV\_DAY7\_IN\_CULTU  
 GSE24034\_TREG\_VS\_TCONV\_POST\_DAY10\_IL

TF enrichment:

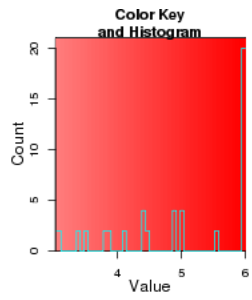

\_\_\_\_\_

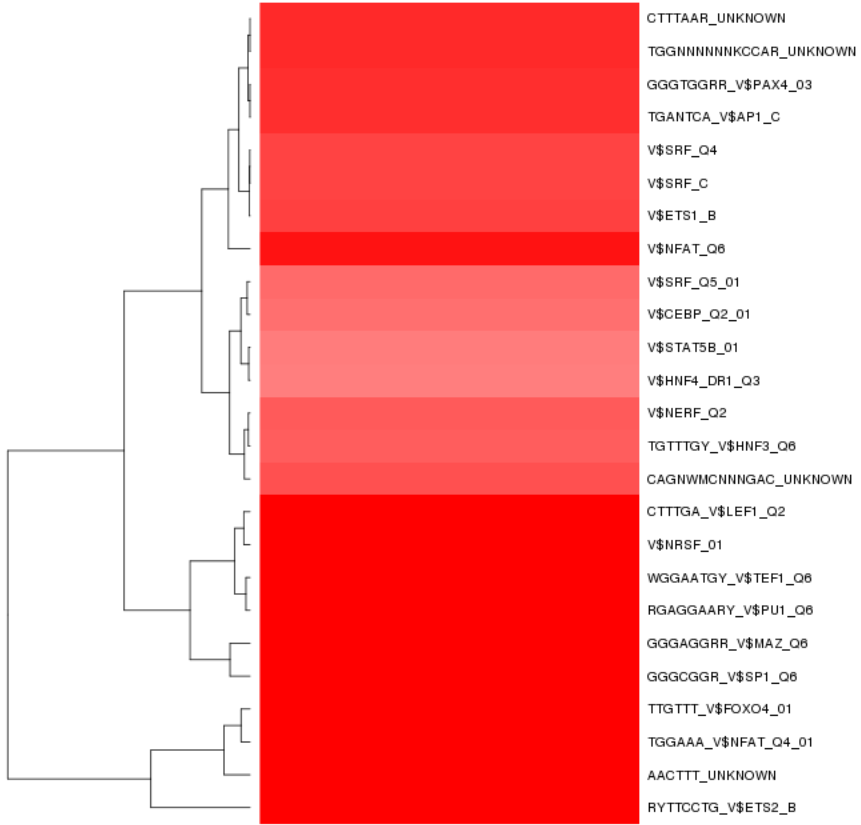

TF zscore:

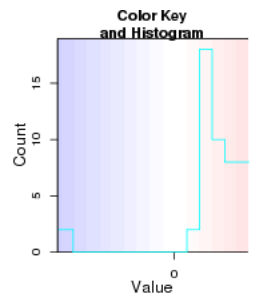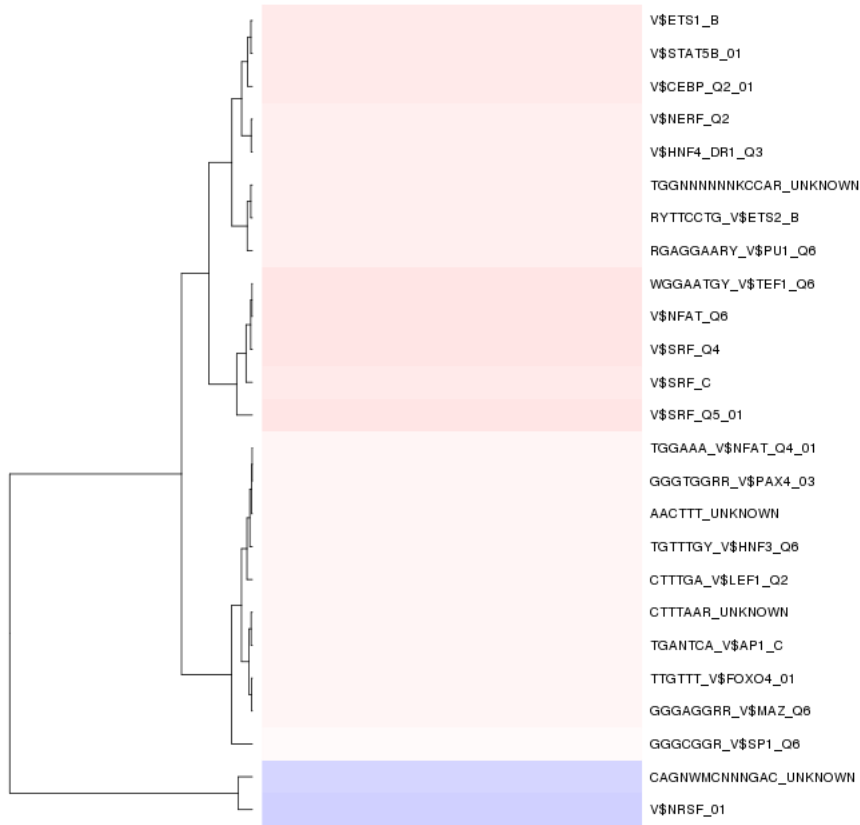

## GO enrichment

Cluster profiler used to call enrichments of significantly differentially regulated genes that map to Entrez IDs.



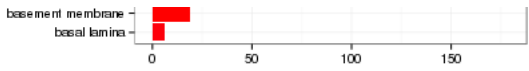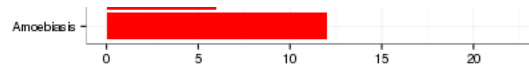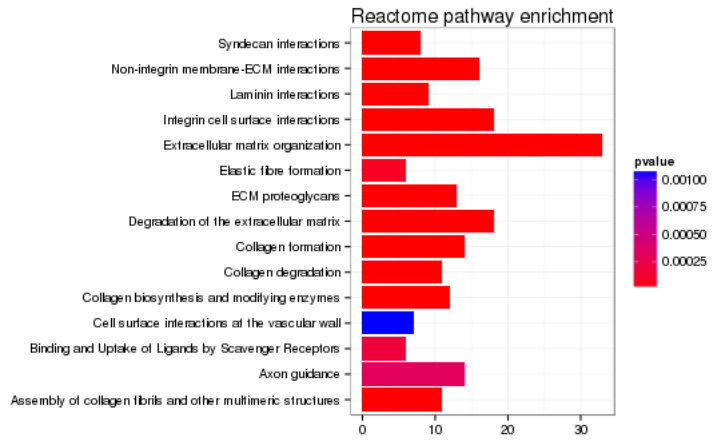

## Enrichment or depletion for stage-specific cell cycle markers

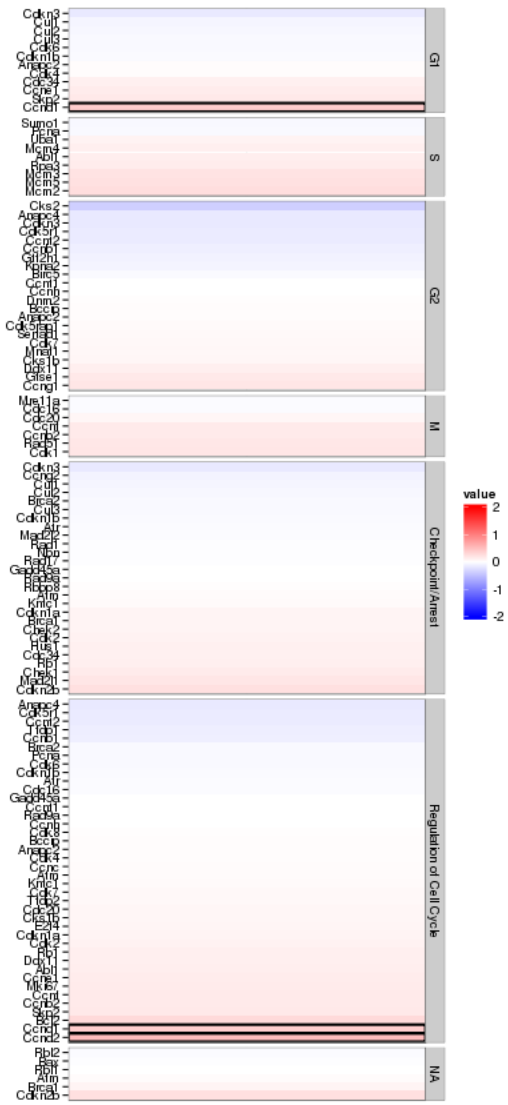

Enrichment or depletion for markers of specific cortical layers

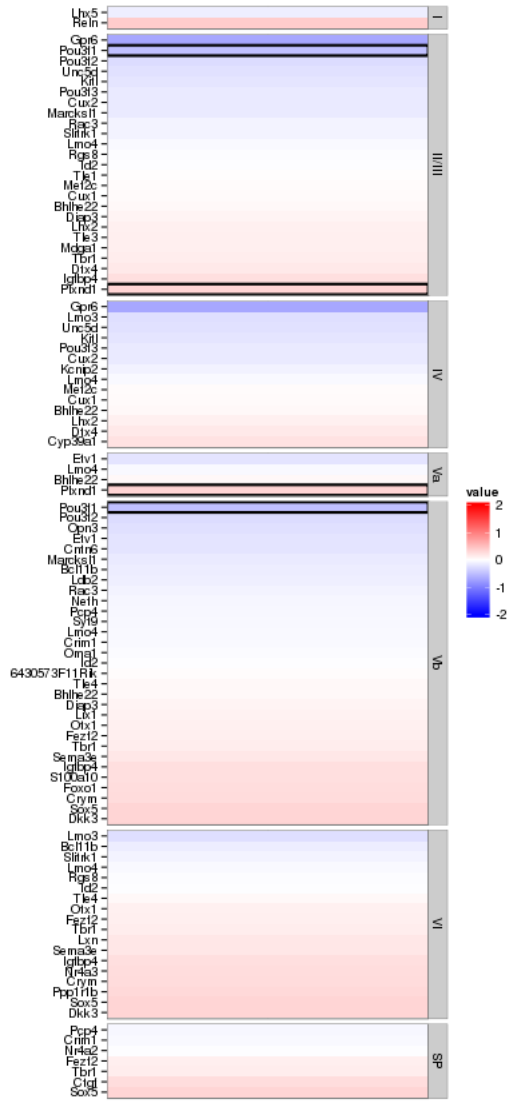

Enrichment or depletion for specific neural cell types



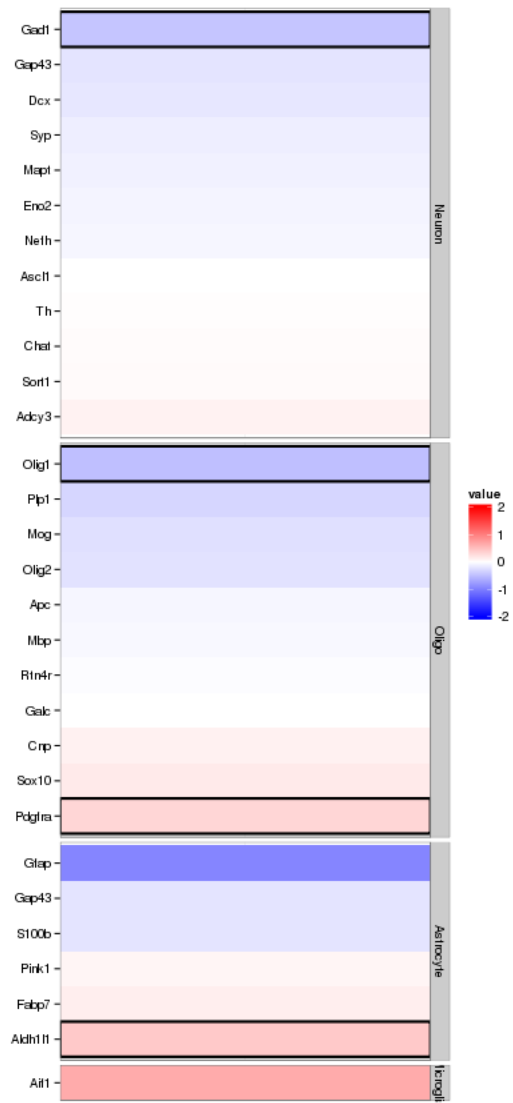

**Enrichment or Depletion of neural differentiation markers**

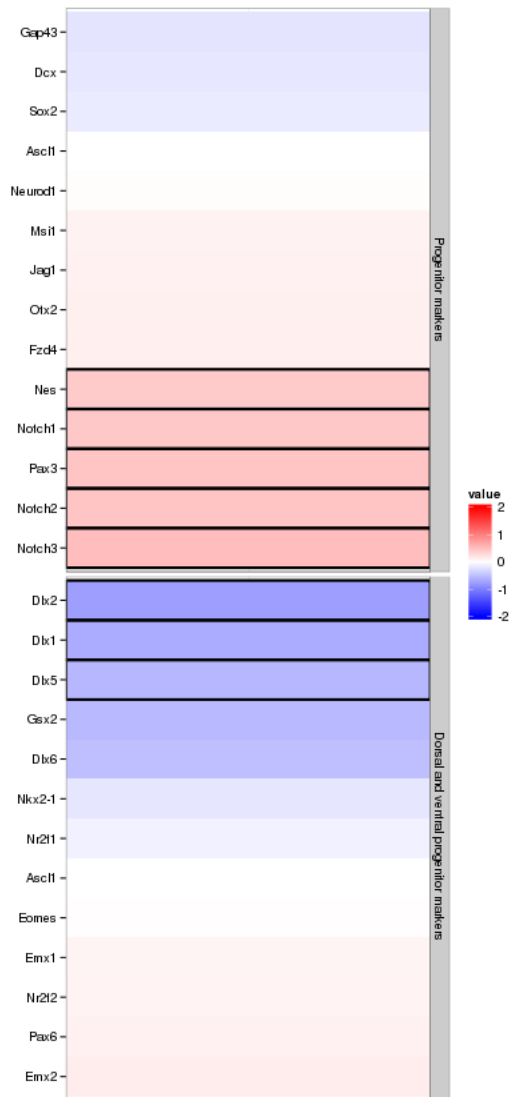

## Cis vs Trans (locally)

$\log_2$  Foldchange and test statistic are calculated with the ratio of  $\text{fpm(KO)}/\text{fpm(WT)}$ , thus the  $\text{test\_stat}$  is positive if a gene is higher in the KO and negative if a gene has lower expression in the KO

The pvalue for 2 genes significantly regulated in a region this size is: 0.1906

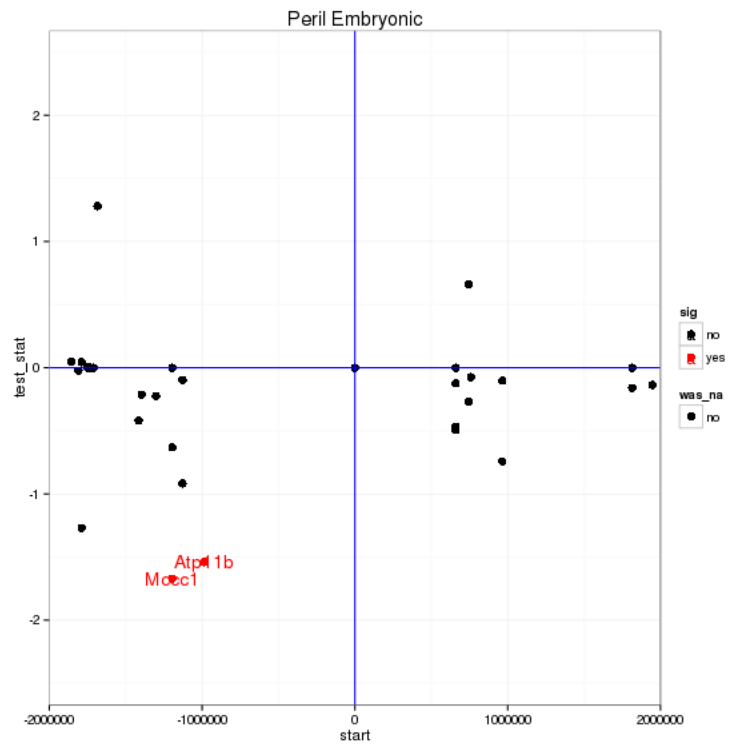

## Notes

Samples used are:

10

- 1 JR753
- 2 JR750
- 3 JR771
- 4 JR755
- 5 JR811
- 6 JR768
- 7 JR761
- 8 JR815
- 9 JR789
- 10 JR748
- 11 JR716
- 12 JR717
- 13 JR719
- 14 JR756

15 JR721  
16 JR718  
17 JR720  
18 JR792

## Replicates

| file                                                                           | sample_name | replicate | rep_name | total_mass  | norm_mass   | internal_scale | external_scale |
|--------------------------------------------------------------------------------|-------------|-----------|----------|-------------|-------------|----------------|----------------|
| 1 /n/rinn_data1/seq/lgooff/Projects/BrainMap/data/quants/JR753/abundances.cxb  | WT          | 0         | WT_0     | 39331900.00 | 30202700.00 | 1.35           | 1.00           |
| 2 /n/rinn_data1/seq/lgooff/Projects/BrainMap/data/quants/JR750/abundances.cxb  | WT          | 1         | WT_1     | 36031100.00 | 30202700.00 | 1.18           | 1.00           |
| 3 /n/rinn_data1/seq/lgooff/Projects/BrainMap/data/quants/JR771/abundances.cxb  | WT          | 2         | WT_2     | 38857100.00 | 30202700.00 | 1.31           | 1.00           |
| 4 /n/rinn_data1/seq/lgooff/Projects/BrainMap/data/quants/JR755/abundances.cxb  | WT          | 3         | WT_3     | 41811300.00 | 30202700.00 | 1.38           | 1.00           |
| 5 /n/rinn_data1/seq/lgooff/Projects/BrainMap/data/quants/JR811/abundances.cxb  | WT          | 4         | WT_4     | 38172800.00 | 30202700.00 | 1.28           | 1.00           |
| 6 /n/rinn_data1/seq/lgooff/Projects/BrainMap/data/quants/JR768/abundances.cxb  | WT          | 5         | WT_5     | 28375200.00 | 30202700.00 | 0.95           | 1.00           |
| 7 /n/rinn_data1/seq/lgooff/Projects/BrainMap/data/quants/JR761/abundances.cxb  | WT          | 6         | WT_6     | 31706200.00 | 30202700.00 | 1.04           | 1.00           |
| 8 /n/rinn_data1/seq/lgooff/Projects/BrainMap/data/quants/JR815/abundances.cxb  | WT          | 7         | WT_7     | 29733100.00 | 30202700.00 | 0.98           | 1.00           |
| 9 /n/rinn_data1/seq/lgooff/Projects/BrainMap/data/quants/JR789/abundances.cxb  | WT          | 8         | WT_8     | 27681500.00 | 30202700.00 | 0.92           | 1.00           |
| 10 /n/rinn_data1/seq/lgooff/Projects/BrainMap/data/quants/JR748/abundances.cxb | WT          | 9         | WT_9     | 32367000.00 | 30202700.00 | 1.03           | 1.00           |
| 11 /n/rinn_data1/seq/lgooff/Projects/BrainMap/data/quants/JR716/abundances.cxb | WT          | 10        | WT_10    | 26144700.00 | 30202700.00 | 0.87           | 1.00           |
| 12 /n/rinn_data1/seq/lgooff/Projects/BrainMap/data/quants/JR717/abundances.cxb | WT          | 11        | WT_11    | 25565400.00 | 30202700.00 | 0.85           | 1.00           |
| 13 /n/rinn_data1/seq/lgooff/Projects/BrainMap/data/quants/JR719/abundances.cxb | WT          | 12        | WT_12    | 22697800.00 | 30202700.00 | 0.73           | 1.00           |
| 14 /n/rinn_data1/seq/lgooff/Projects/BrainMap/data/quants/JR756/abundances.cxb | WT          | 13        | WT_13    | 38948900.00 | 30202700.00 | 1.30           | 1.00           |
| 15 /n/rinn_data1/seq/lgooff/Projects/BrainMap/data/quants/JR721/abundances.cxb | Peril       | 0         | Peril_0  | 22593200.00 | 30202700.00 | 0.75           | 1.00           |
| 16 /n/rinn_data1/seq/lgooff/Projects/BrainMap/data/quants/JR718/abundances.cxb | Peril       | 1         | Peril_1  | 27635500.00 | 30202700.00 | 0.92           | 1.00           |
| 17 /n/rinn_data1/seq/lgooff/Projects/BrainMap/data/quants/JR720/abundances.cxb | Peril       | 2         | Peril_2  | 19589600.00 | 30202700.00 | 0.64           | 1.00           |
| 18 /n/rinn_data1/seq/lgooff/Projects/BrainMap/data/quants/JR792/abundances.cxb | Peril       | 3         | Peril_3  | 29654500.00 | 30202700.00 | 0.99           | 1.00           |

## Session Info

```
## R version 3.0.2 (2013-09-25)
## Platform: x86_64-unknown-linux-gnu (64-bit)
##
## locale:
## [1] LC_CTYPE=en_US.UTF-8      LC_NUMERIC=C
## [3] LC_TIME=en_US.UTF-8      LC_COLLATE=en_US.UTF-8
## [5] LC_MONETARY=en_US.UTF-8  LC_MESSAGES=en_US.UTF-8
## [7] LC_PAPER=en_US.UTF-8     LC_NAME=C
## [9] LC_ADDRESS=C             LC_TELEPHONE=C
## [11] LC_MEASUREMENT=en_US.UTF-8 LC_IDENTIFICATION=C
##
## attached base packages:
## [1] grid      parallel  methods  stats    graphics  grDevices  utils
## [8] datasets  base
##
## other attached packages:
## [1] plyr_1.8.1
```

```

## [2] stringr_0.6.2
## [3] seqbias_1.10.0
## [4] BSgenome.Mmusculus.UCSC.mm10_1.3.19
## [5] BSgenome_1.30.0
## [6] Biostrings_2.30.1
## [7] gdata_2.13.3
## [8] GO.db_2.10.1
## [9] org.Mm.eg.db_2.10.1
## [10] clusterProfiler_1.13.1
## [11] DOSE_2.0.0
## [12] ReactomePA_1.6.1
## [13] AnnotationDbi_1.24.0
## [14] Biobase_2.22.0
## [15] mgcv_1.7-29
## [16] nlme_3.1-117
## [17] RMySQL_0.9-3
## [18] RColorBrewer_1.0-5
## [19] gridExtra_0.9.1
## [20] gtable_0.1.2
## [21] marray_1.40.0
## [22] ggplots_2.13.0
## [23] GSA_1.03
## [24] limma_3.18.13
## [25] xtable_1.7-3
## [26] cummeRbund_2.7.2
## [27] gviz_1.6.0
## [28] rtracklayer_1.22.7
## [29] GenomicRanges_1.14.4
## [30] XVector_0.2.0
## [31] IRanges_1.20.7
## [32] fastcluster_1.1.13
## [33] reshape2_1.4
## [34] ggplot2_1.0.0
## [35] RSQLite_0.11.4
## [36] DBI_0.2-7
## [37] BiocGenerics_0.8.0
## [38] knitr_1.6
##
## loaded via a namespace (and not attached):
## [1] biomaRt_2.18.0      biovizBase_1.10.8  bitops_1.0-6
## [4] caTools_1.17        cluster_1.15.2     colorspace_1.2-4
## [7] dichromat_2.0-0     digest_0.6.4       DO.db_2.7
## [10] evaluate_0.5.5      formatR_0.10       Formula_1.1-1
## [13] GenomicFeatures_1.14.5 GOSeqSim_1.20.3    graph_1.40.1
## [16] graphite_1.8.1      gtools_3.4.1       Hmisc_3.14-4
## [19] igraph_0.7.1        KEGG.db_2.10.1     KernSmooth_2.23-12
## [22] labeling_0.2        lattice_0.20-29    latticeExtra_0.6-26
## [25] MASS_7.3-33         Matrix_1.1-3       munsell_0.4.2
## [28] org.Hs.eg.db_2.10.1 proto_0.3-10       qvalue_1.36.0
## [31] Rcpp_0.11.2         RCurl_1.95-4.1     reactome.db_1.46.1
## [34] Rsamtools_1.14.3    scales_0.2.4       splines_3.0.2
## [37] stats4_3.0.2        survival_2.37-7    tcltk_3.0.2

```

```
## [40] tools_3.0.2
```

```
XML_3.98-1.1
```

```
zlibbioc_1.8.0
```

## Run Info

```
##      param
## 1    cmd_line
## 2      version
## 3  SVN_revision
## 4 boost_version
## 5      genome
##
## 1 cuffdiff -p 10 -L WT,Peril -o /n/rinn_data1/seq/lgoff/Projects/BrainMap/data/diffs/Peril_vs_WT_Embryonic /n/rinn_data1/seq/lgoff/Projects/BrainMap/dat
## 2
## 3
## 4
## 5
```

# Trp53cor1 KO vs WT (Adult)

This file shows the wt-v-ko comparison for Trp53cor1.

Cuff overview:

```
## CuffSet instance with:  
## 2 samples  
## 26754 genes  
## 77524 isoforms  
## 0 TSS  
## 23066 CDS  
## 0 promoters  
## 0 splicing  
## 19954 relCDS
```

## QC

### Dispersion

Dispersion plot for genes in cuff: (Overdispersion can lead to innacurate quants)

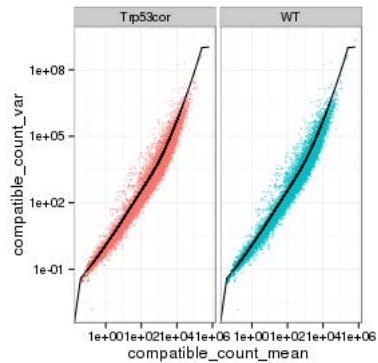

### Cross-replicate variability (fpkmSCVplot)

Differences in CV 2 can result in lower numbers of differentially expressed genes due to a higher degree of variability between replicate fpkm estimates.

Genes:

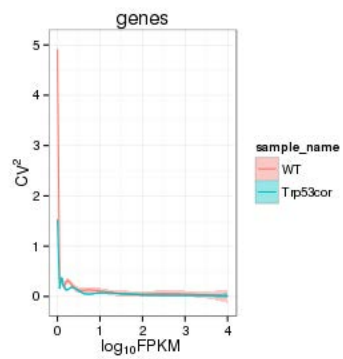

Isoforms:

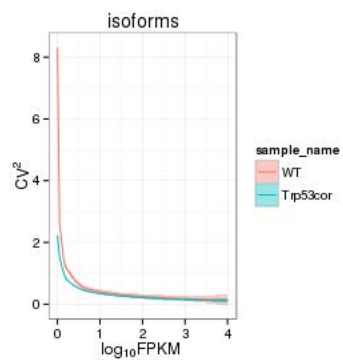

## MvA plot

```
## Error: non-numeric argument to binary operator
```

## MvA plot counts

```
## Error: non-numeric argument to binary operator
```

## Scatterplot matrix



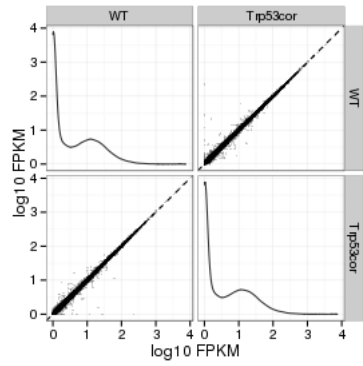

## Distributions

### Boxplots

Boxplot (genes)

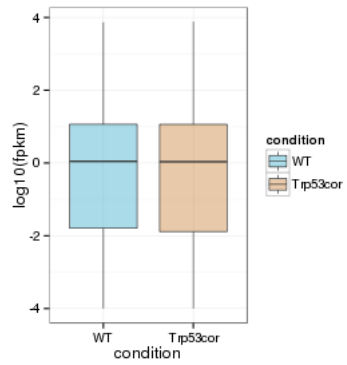

Boxplot (genes, replicates)

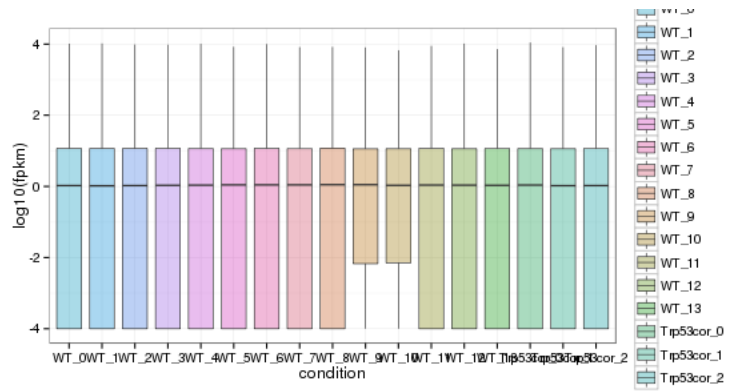

Boxplot (isoforms)

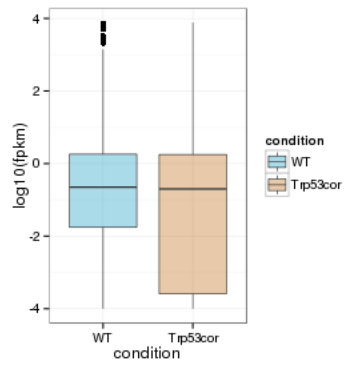

Boxplot (isoforms, replicates)

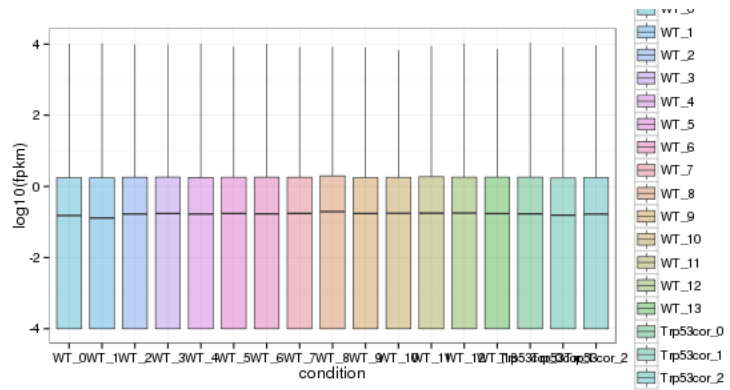

Density

Density (genes)

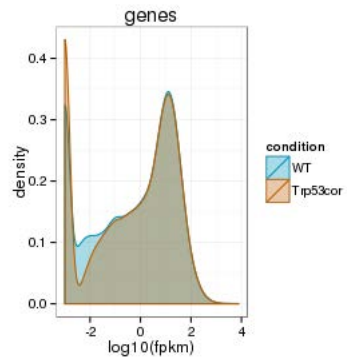

Density (genes, replicates)

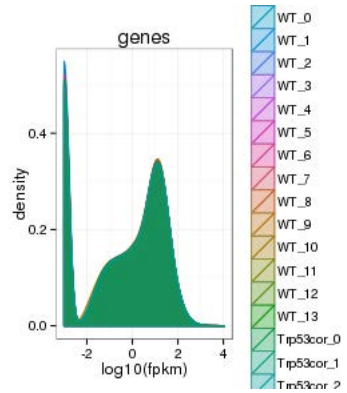

## Clustering

### Replicate Clusters

All genes(cuff)

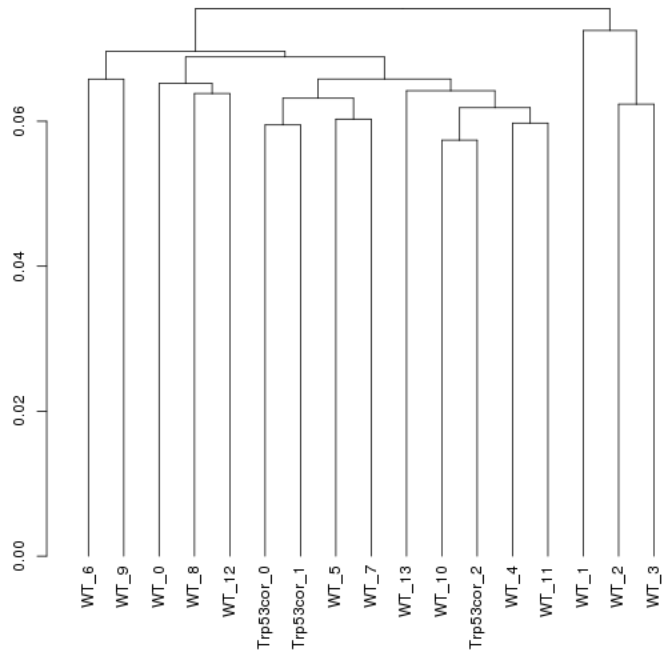

## NULL

PCA (genes)

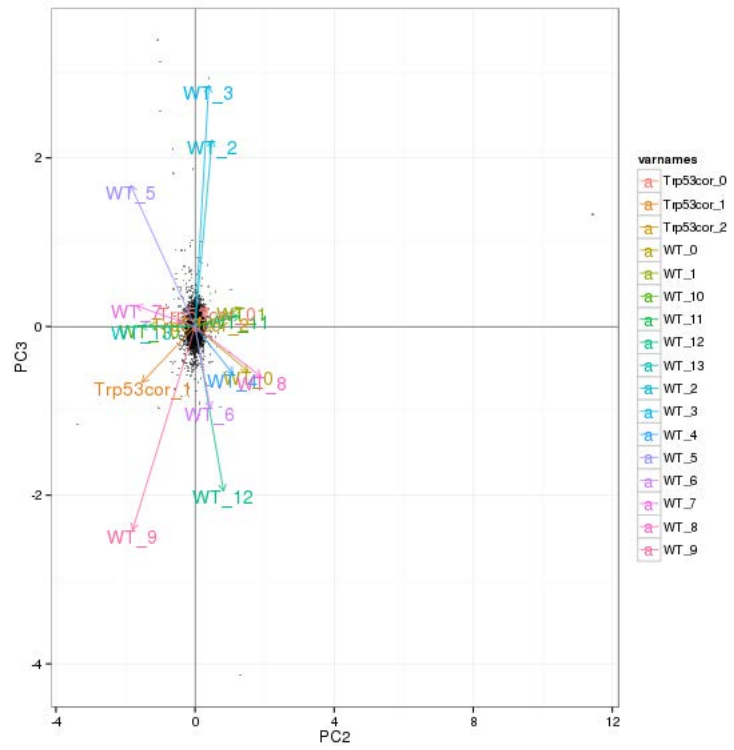

**MDS (genes)**

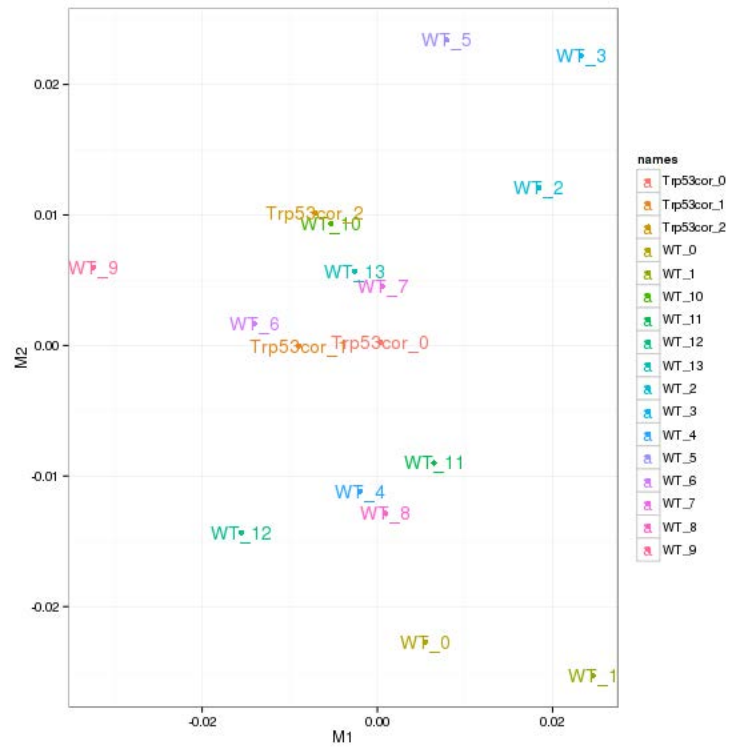

## KO assessment

Endogenous lncRNA expression

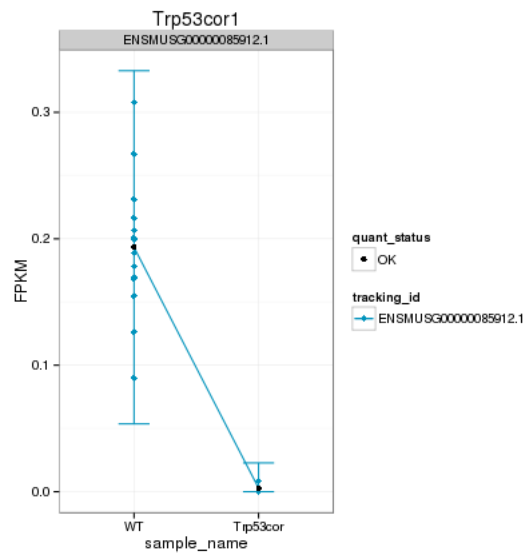

Endogenous expression of Trp53cor1 isoforms:

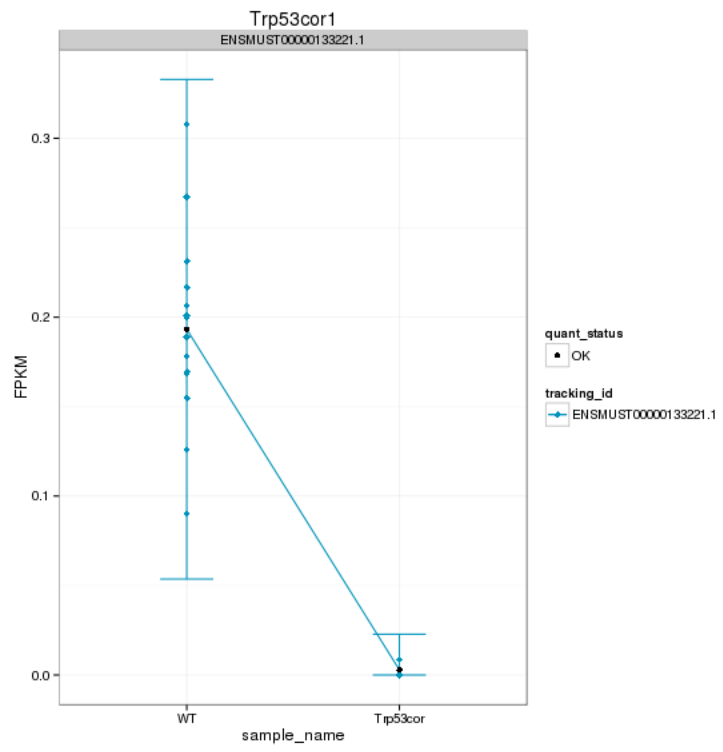

Barplot of gene expression:



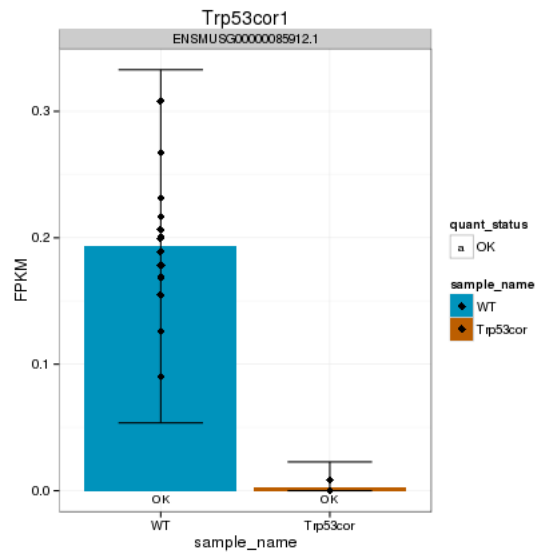

Barplot of isoform expression:

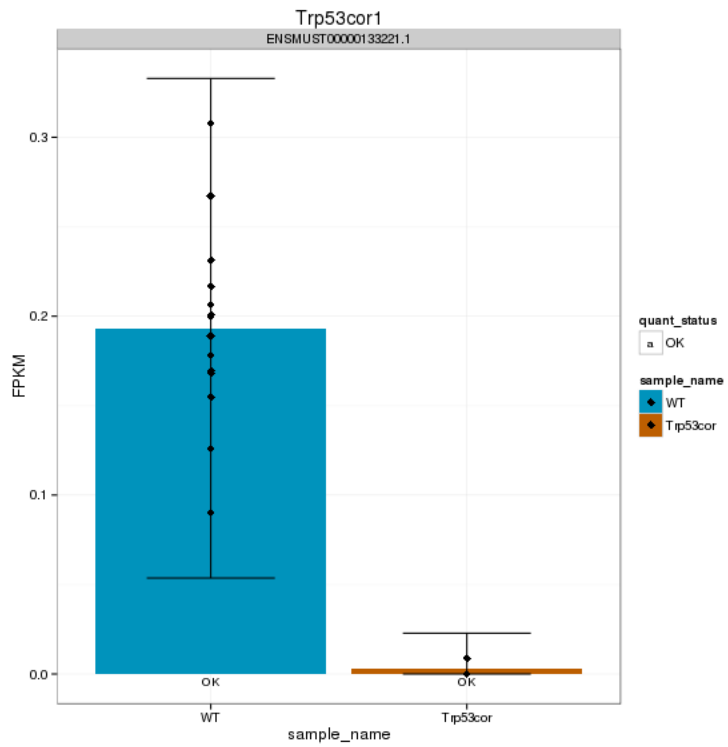

## LacZ expression

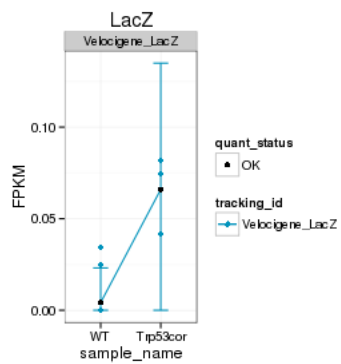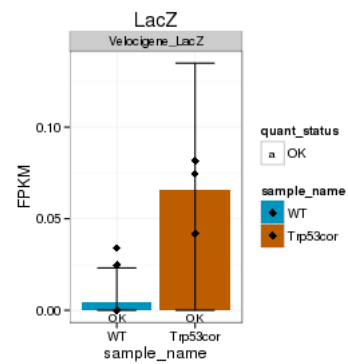

## Digital Genotyping (LacZ vs Endogenous lincRNA and Sex)

Eif2s3y is a y-expressed gene, Xist is an x-expressed gene Expression plot (endogenous linc, lacZ, Y-expressed gene):

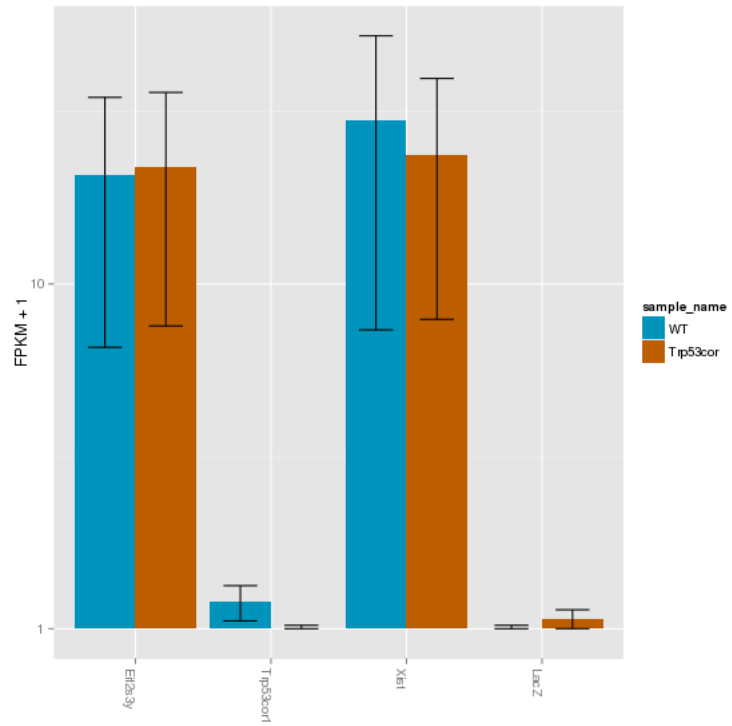

Expression heatmap:

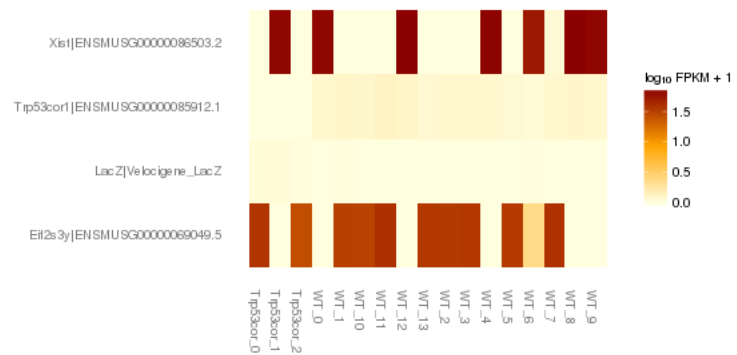

Track visualization

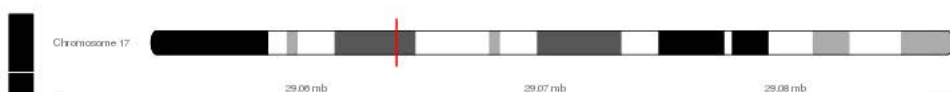

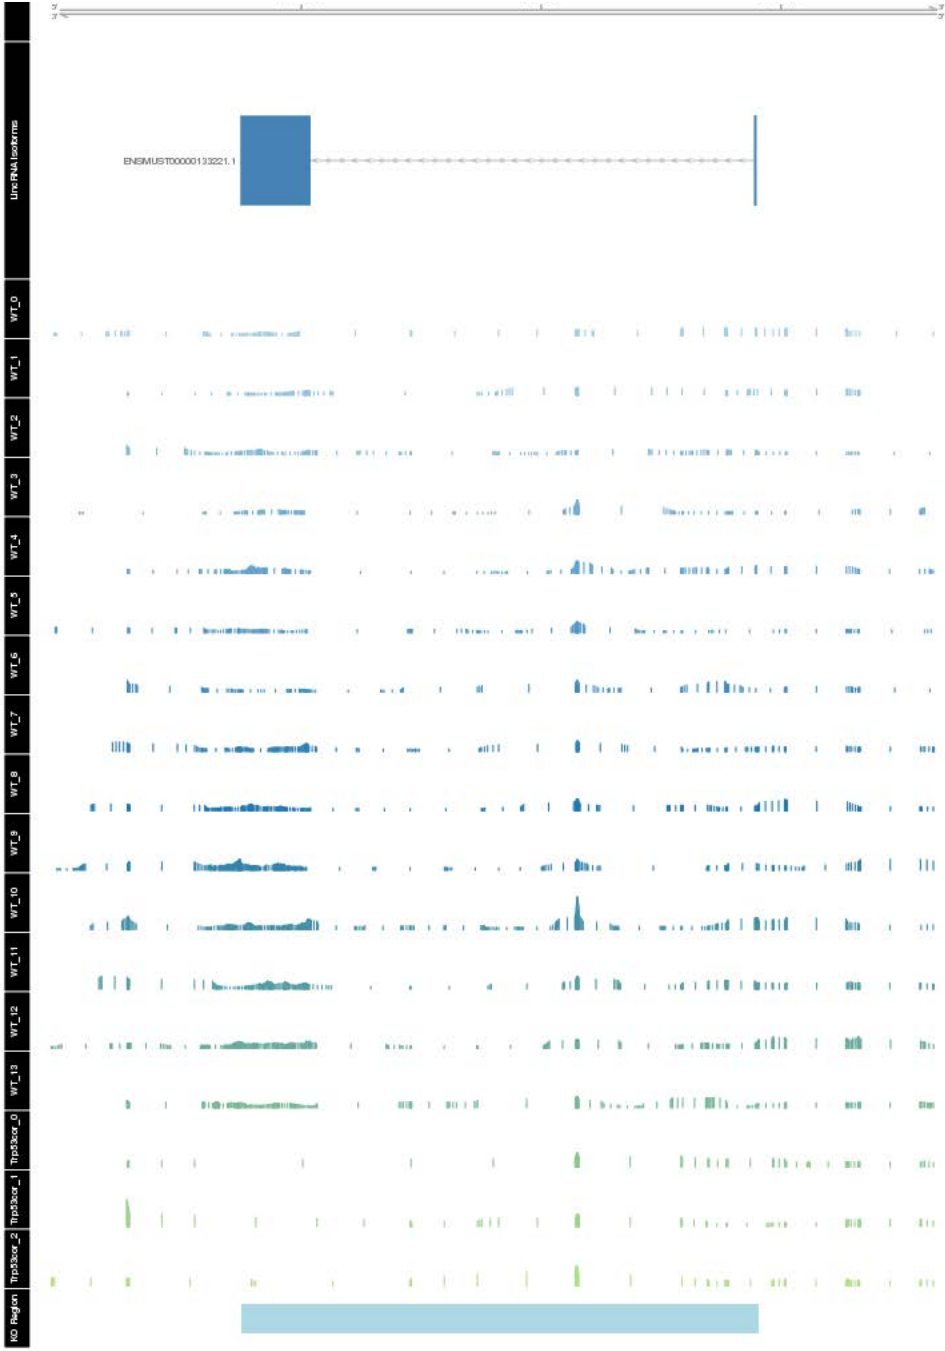

# Differential Analysis

## Differential Genes

There are 69 significantly differentially expressed genes. They are:

**geneAnnot\$gene\_short\_name**

- 1 Gabra2
- 2 Arrdc2
- 3 Nes
- 4 Epha2
- 5 Khgrp
- 6 Odc1
- 7 Tjap1
- 8 Etnppl
- 9 Fabp7
- 10 Sgk1
- 11 Adi1
- 12 Serpina3n
- 13 Kcnv1
- 14 Cdkn1a
- 15 Park2
- 16 Mpc1
- 17 Flywch2
- 18 Mut
- 19 Enpp4
- 20 Ppil1
- 21 Cpne5
- 22 Pi16
- 23 Glo1
- 24 Prss41
- 25 Atp6v0c
- 26 Spsb3
- 27 Adamts10
- 28 Rps24
- 29 Rps6
- 30 Adamts9
- 31 Gkn3
- 32 A2m
- 33 Hddc3
- 34 Tlr13
- 35 Arhgap27
- 36 Rnps1
- 37 Lars2

38 3110052M02Rik  
39 Decr2  
40 Cramp1l  
41 Gm129  
42 Akap12  
43 Itpkb  
  
44 Lyp1a1  
45 Fmo2  
46 Rps19  
47 Maff  
48 Gm9493  
49 Zfp758  
50 Acp1  
51 Hmga1  
52 Tmem252  
53 Pla2g4e  
54 Tagap1  
55 Amtl  
56 Per2  
57 H2-T22  
58 Ide  
59 Cox5b  
60 H2-T23  
61 Zfp760  
62 H2-BI  
63 9030025P20Rik  
64 Hmga1-rs1  
65 Apold1  
66 AA465934  
67 Rpl41  
68 Gm9825  
69 Tmem181b-ps

## **Matrix of gene significant differences between conditions**

(skip for Brainmap wt-v-ko comparisons)

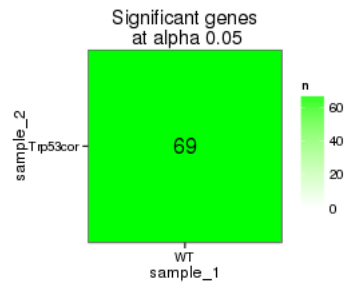

## Significant gene expression differences between conditions

Expression plot (genes):(turned off)

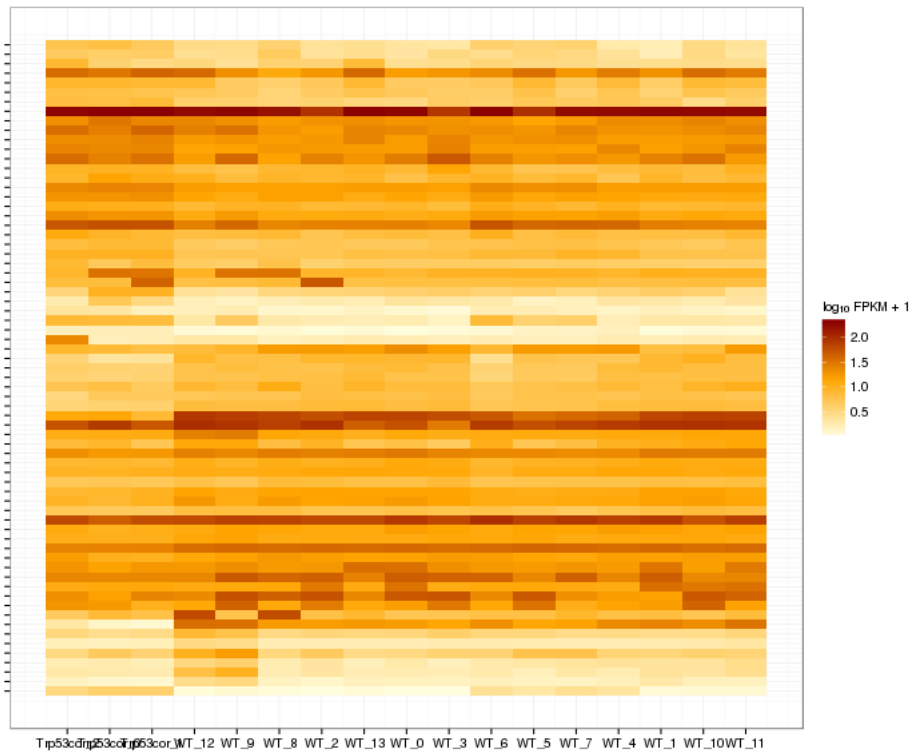

Significant genes with expression >50fpkm (any condition):(turned off)

An individual look at each of the highly expressed significantly differentially regulated genes: (eval=false for first pass)

## Expression-level/significance relationship

Scatter plot of significant genes only:

```
## Error: One or more values of 'x' or 'y' are not valid sample names!
```

Volcano Plot

```
## Error: One or more values of 'x' or 'y' are not valid sample names!
```

Volcano plot with significant genes only:

```
## Error: One or more values of 'x' or 'y' are not valid sample names!
```

FoldChange Heatmap

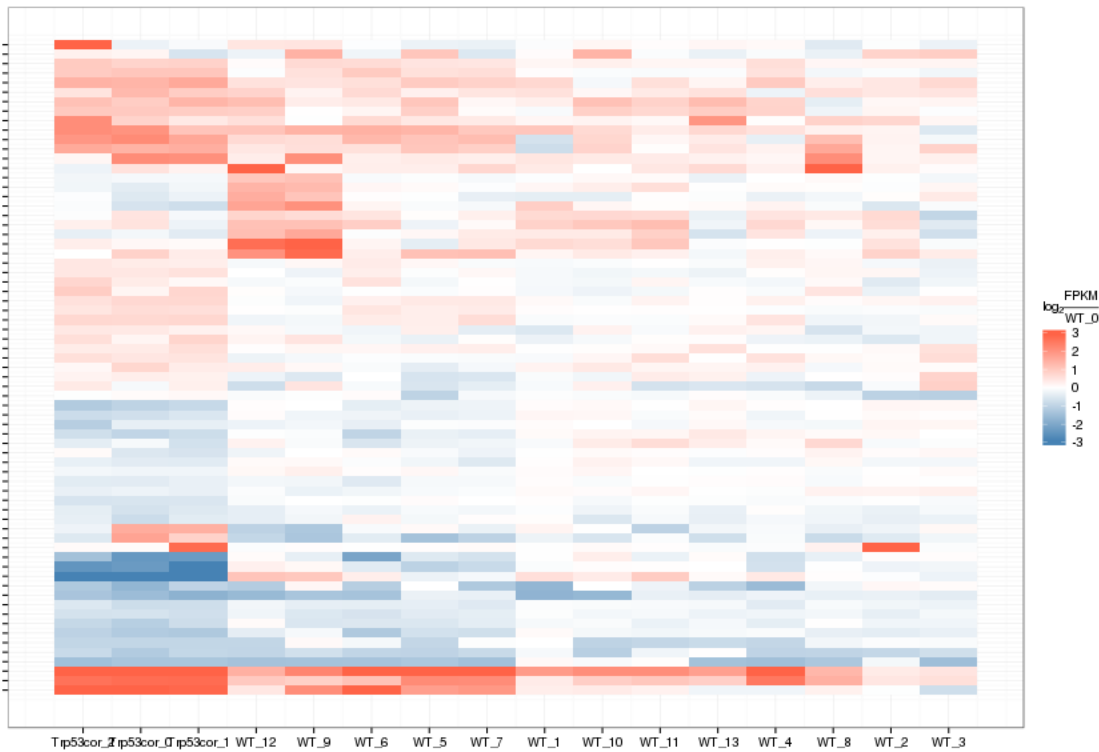

## Differential Splicing

Differential Isoforms between conditions



Per isoform difference between conditions:

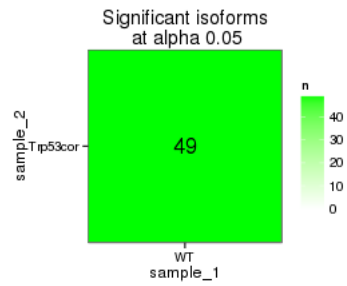

These isoforms are:

| isoAnnot | gene_short_name |
|----------|-----------------|
| 1        | Gabra2          |
| 2        | Rec8            |
| 3        | Klf4            |
| 4        | Nes             |
| 5        | Prlr            |
| 6        | Epha2           |
| 7        | Khsrp           |
| 8        | Etnppl          |
| 9        | Fabp7           |
| 10       | Serpina3n       |
| 11       | Tfrc            |
| 12       | Cdkn1a          |
| 13       | Hcfc1r1         |
| 14       | Mut             |
| 15       | Ppil1           |
| 16       | Cpne5           |
| 17       | Glo1            |
| 18       | Atp6v0c         |
| 19       | Adamts10        |
| 20       | Rps24           |
| 21       | Gng13           |
| 22       | Gkn3            |
| 23       | A2m             |
| 24       | Hddc3           |
| 25       | Vps8            |
| 26       | Rnps1           |

27 Lars2  
28 3110052M02Rik  
29 Decr2  
30 Cramp11  
31 Ano2  
32 Akap12  
33 Itpkb  
34 Lyplal1  
35 Fmo2  
36 Bcor  
  
37 Gm9493  
38 Pla2g4e  
39 Tagap1  
40 Amtl  
41 Ide  
42 Zfp945  
43 Zfp760  
44 Fndc1  
45 H2-BI  
46 9030025P20Rik  
47 Mog  
48 Apold1  
49 Gm9825

Gene-level DE isoform heatmap

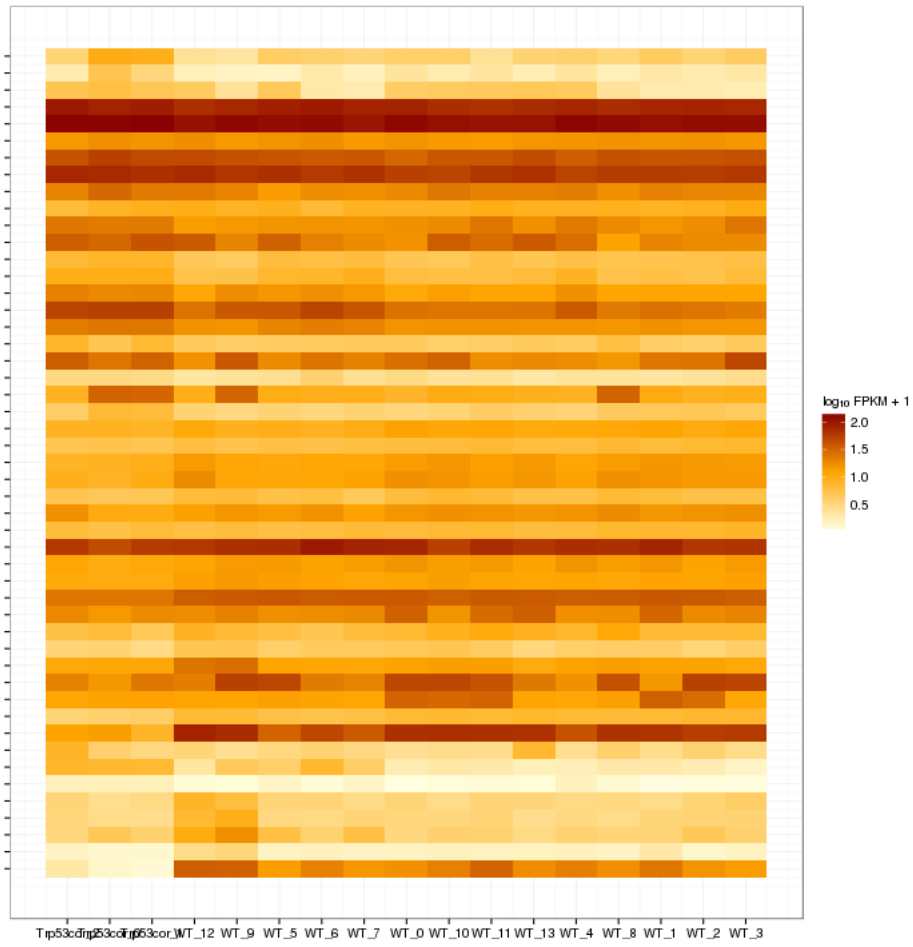

Isoform foldchange heatmap by isoform:

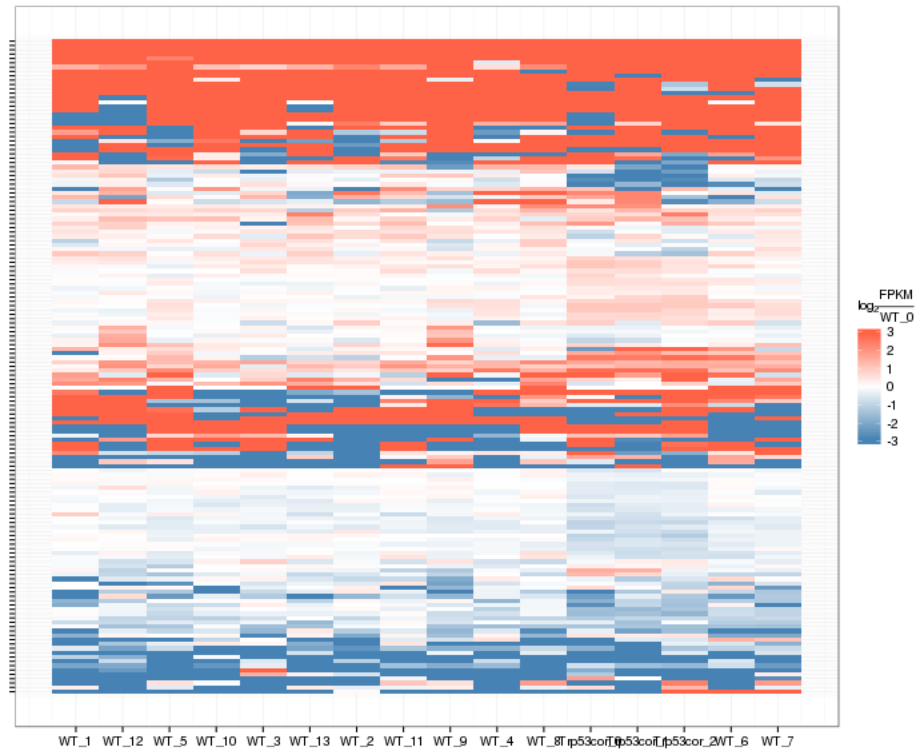

## Differential Splicing between conditions

(eval false for first pass)

Per condition differences in isoforms (Does gene have diff piechart between conditions?)

These genes are:

Splicing heatmap by isoform:

Splicing heatmap by gene

The following are significantly differentially spliced genes (relative portion of isoform per condition):

## Gene/Pathway Analysis

### GSEA

Enrichment and zscores are calculated based on expression in KO vs WT ( $\text{fpkmKO}/\text{fpkmWT}$ ), so genes that are down regulated in KO are shown in blue, while upregulation is shown in red.

KOWT Blue = down in KO Red = Up in KO

Biocarta enrichment:

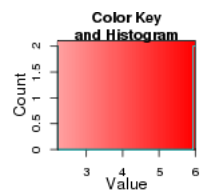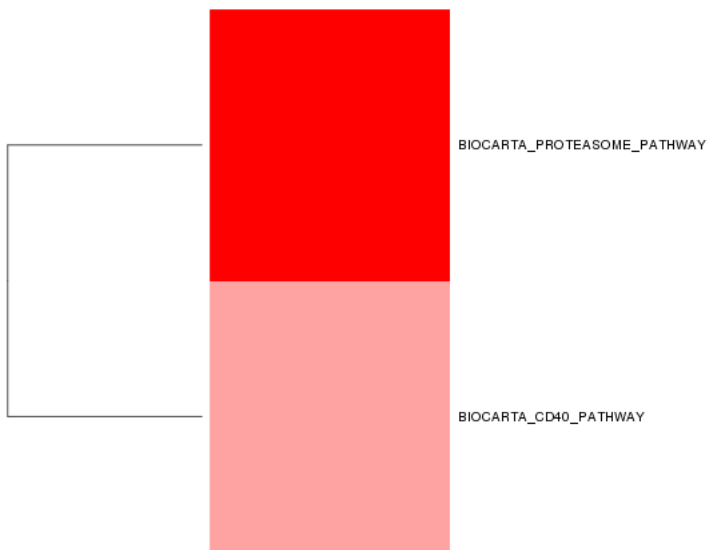

Biocarta zscore:

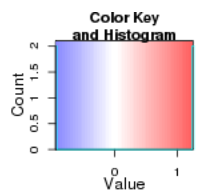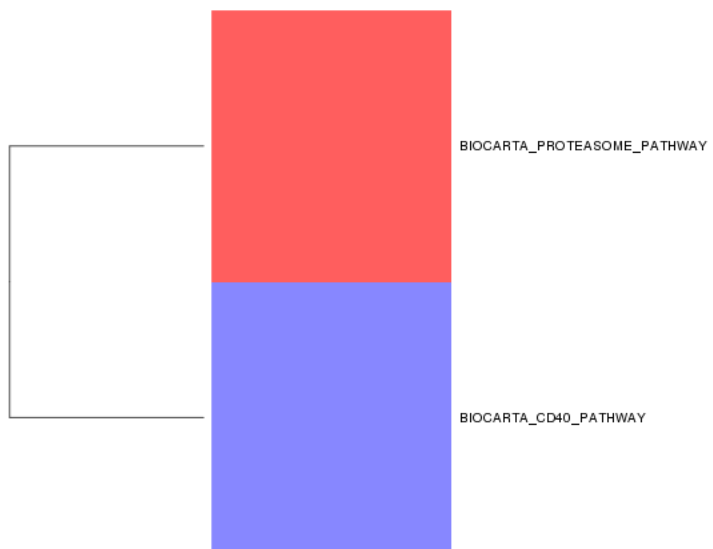

Reactome enrichment:

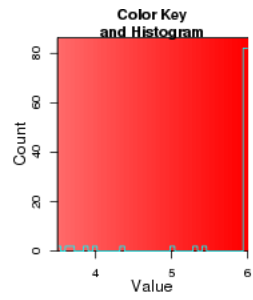

\_\_\_\_\_

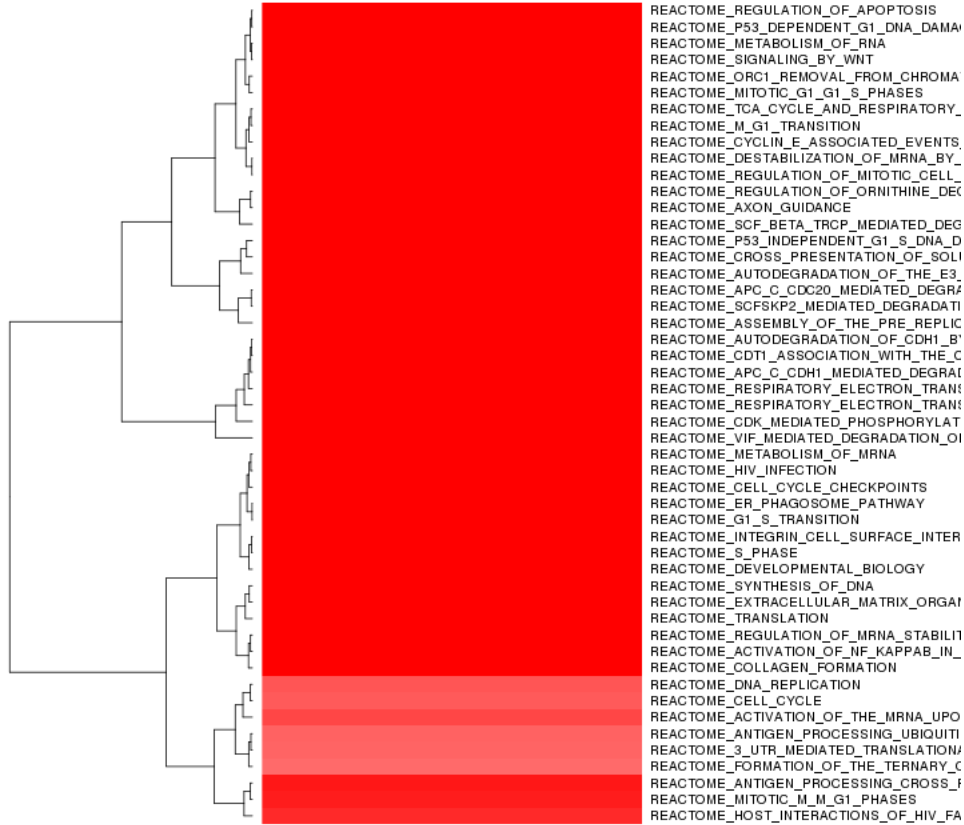

Reactome zscore:

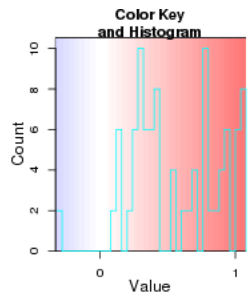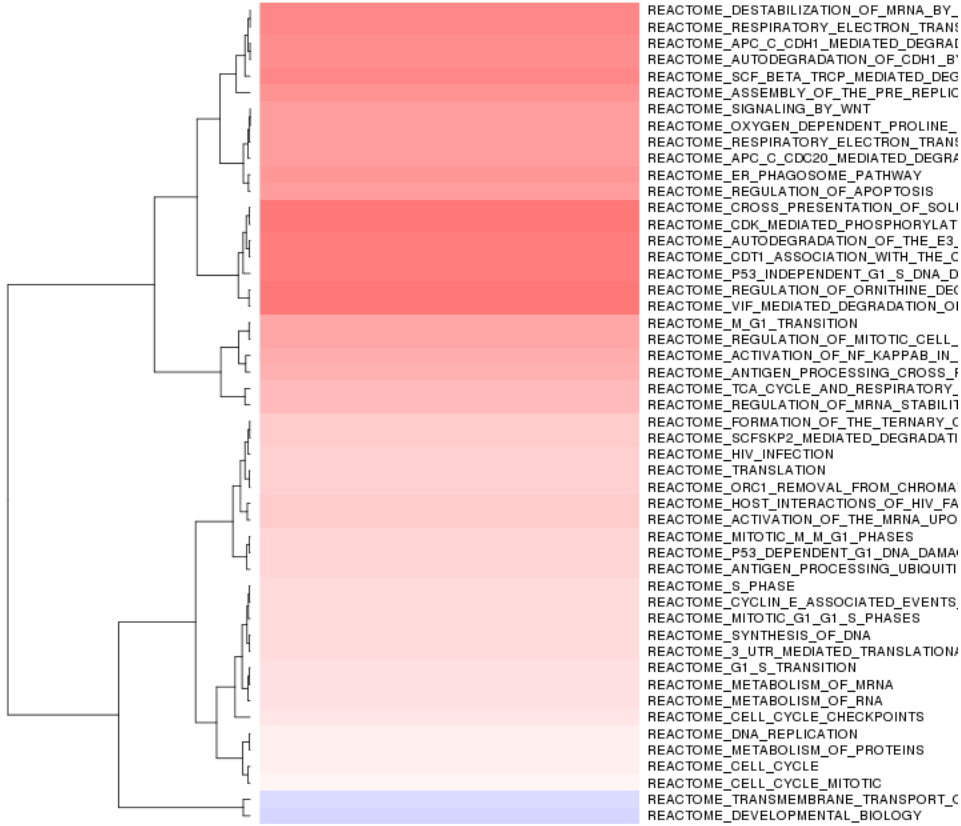

Kegg enrichment:



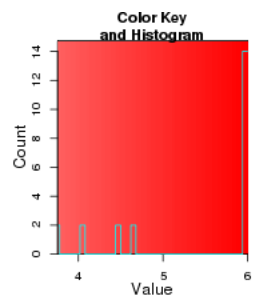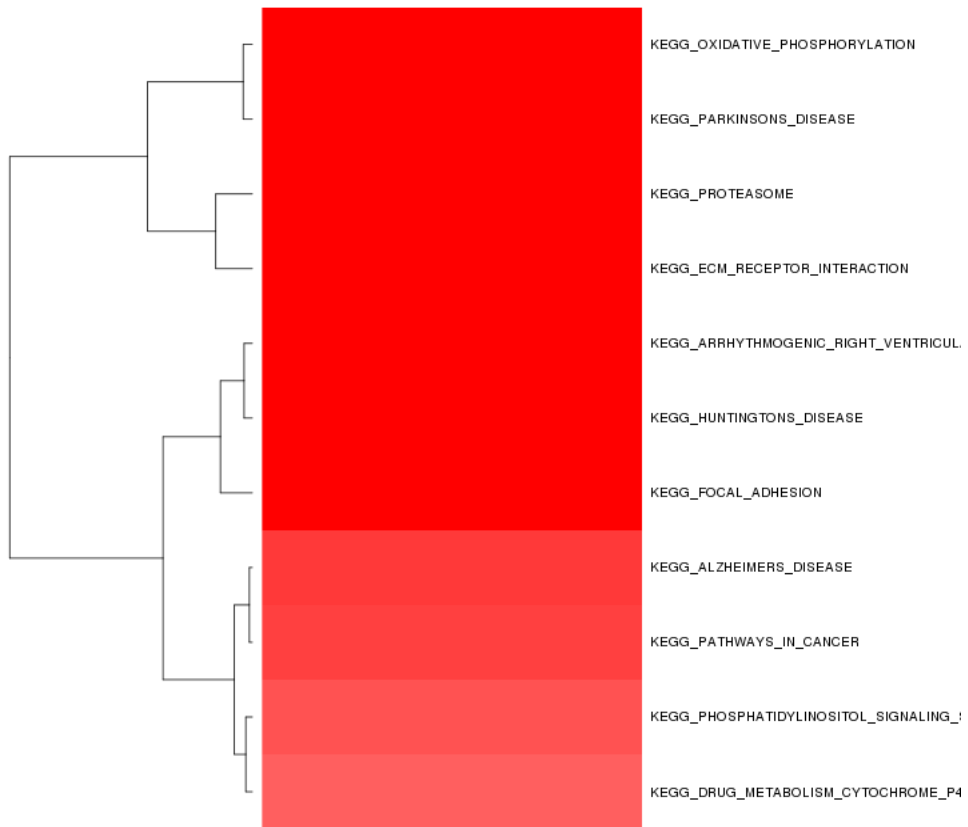

Kegg zscore:

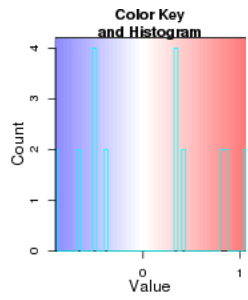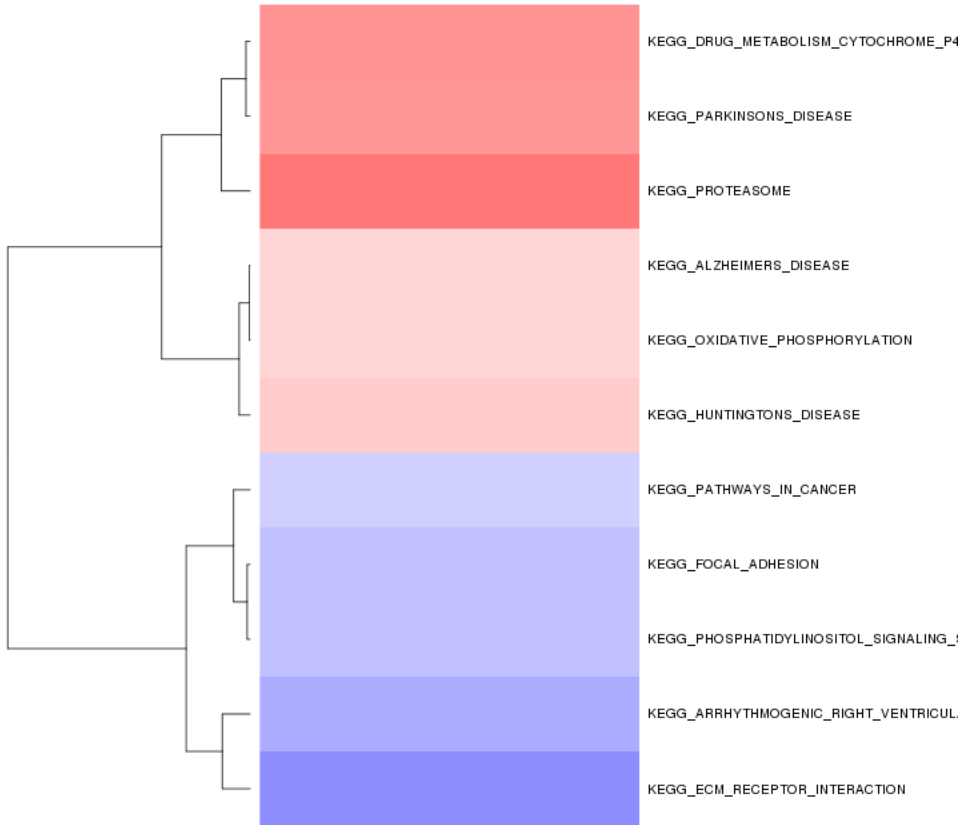

Interneuron enrichment:

## Error: no locations are finite



5HT\_genes

Lhx0\_genes

Interneuron zscore:

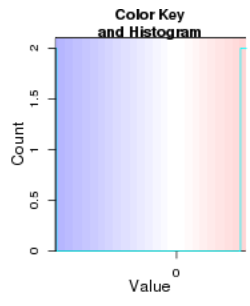

\_\_\_\_\_

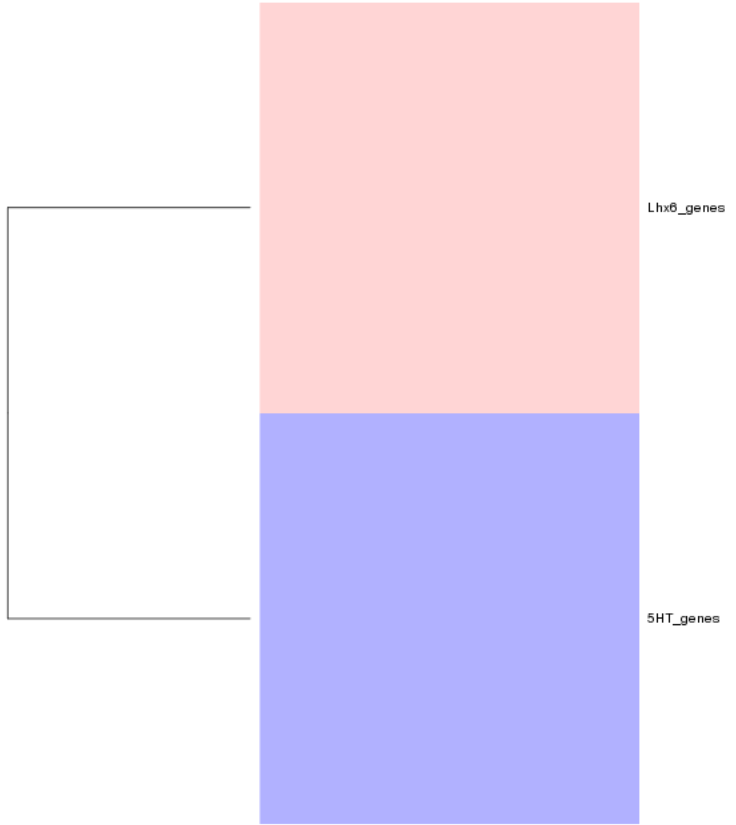

Oncogene enrichment:

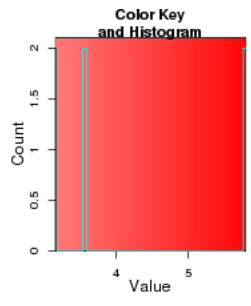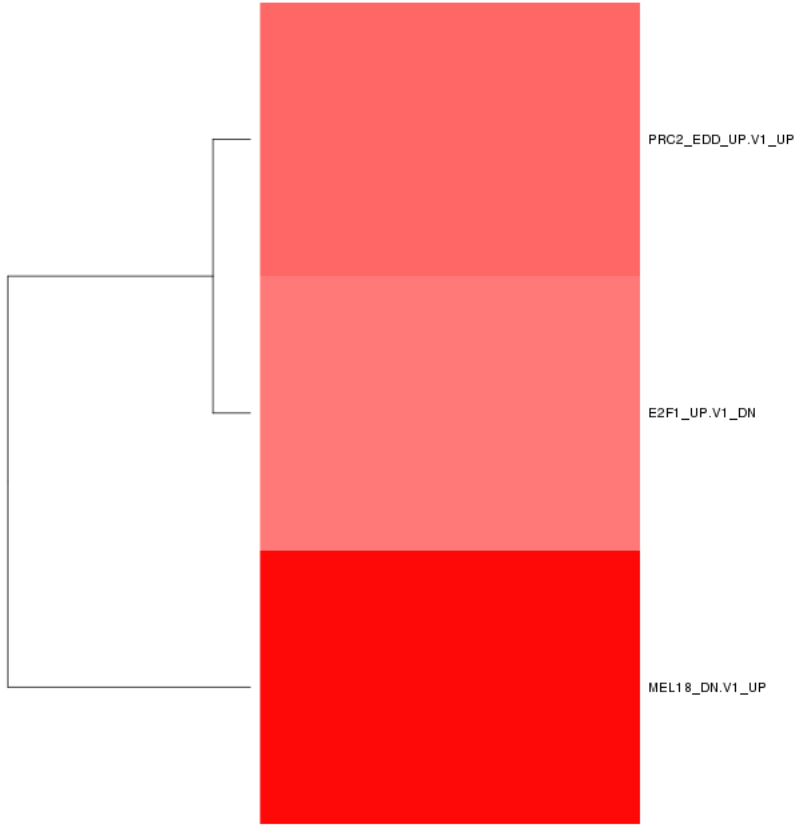

Oncogene zscore:

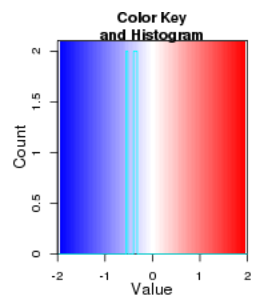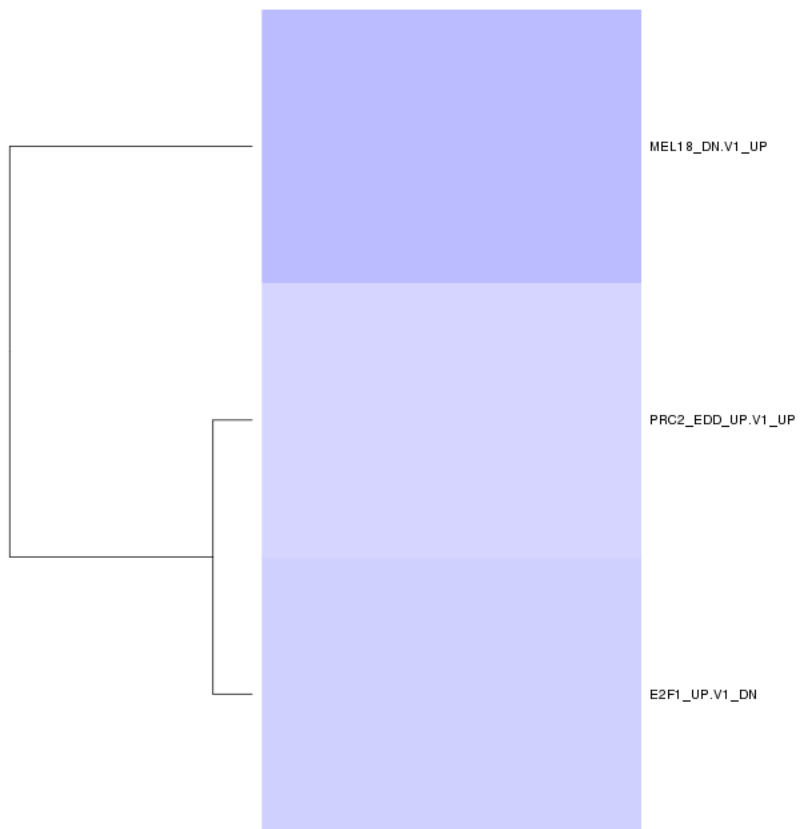

Immuno enrichment:

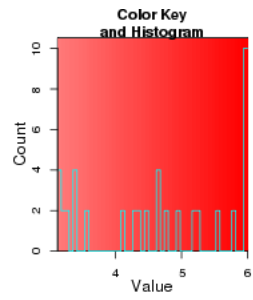

\_\_\_\_\_

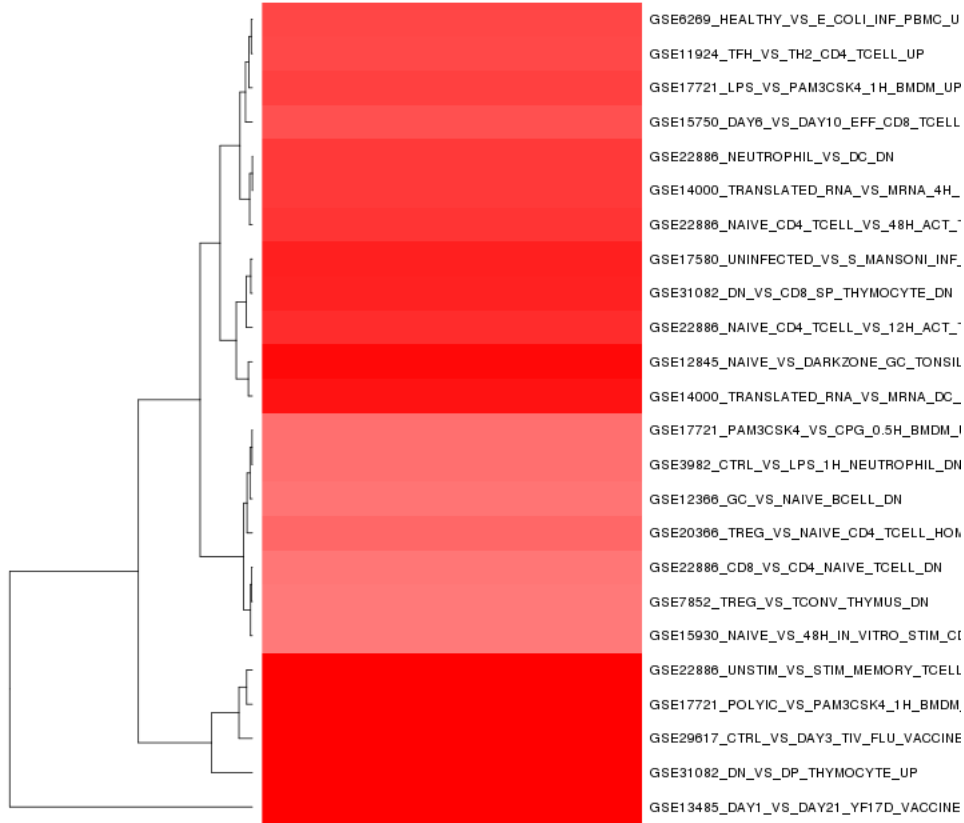

Immuno zscore:

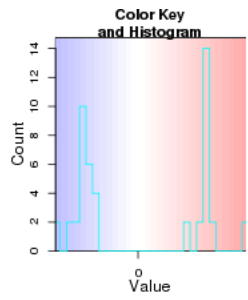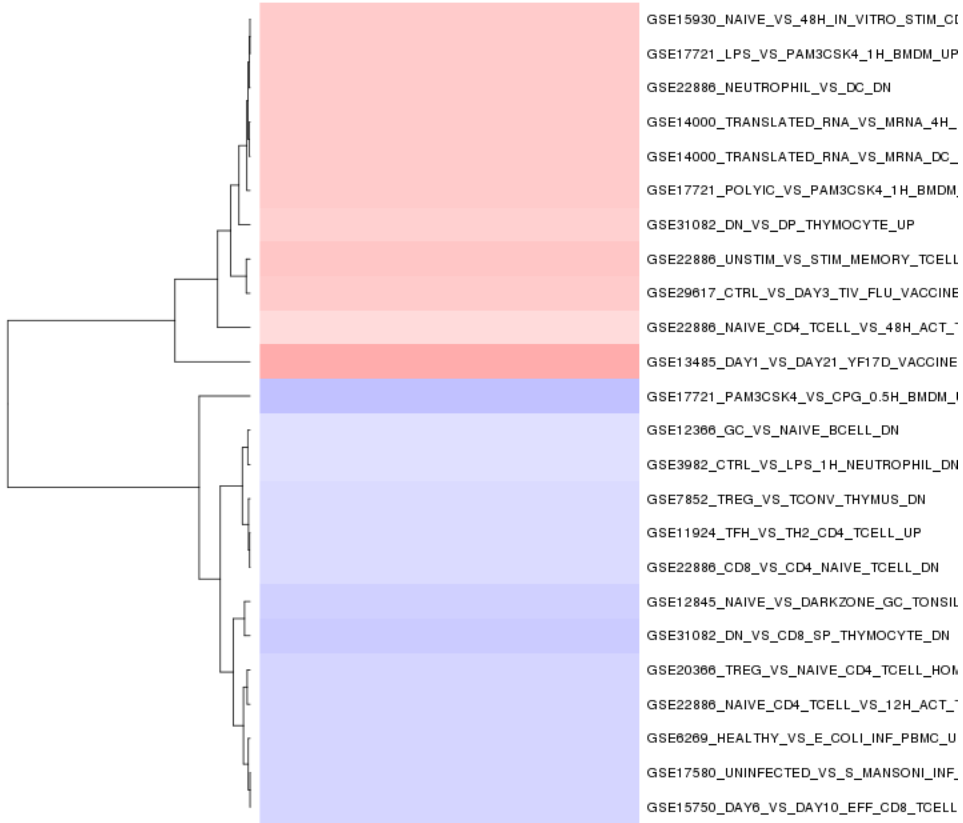

TF enrichment:

## Error: subscript out of bounds



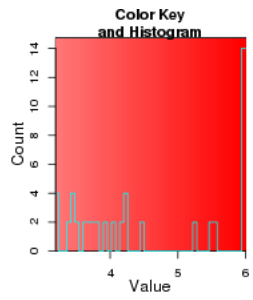

\_\_\_\_\_

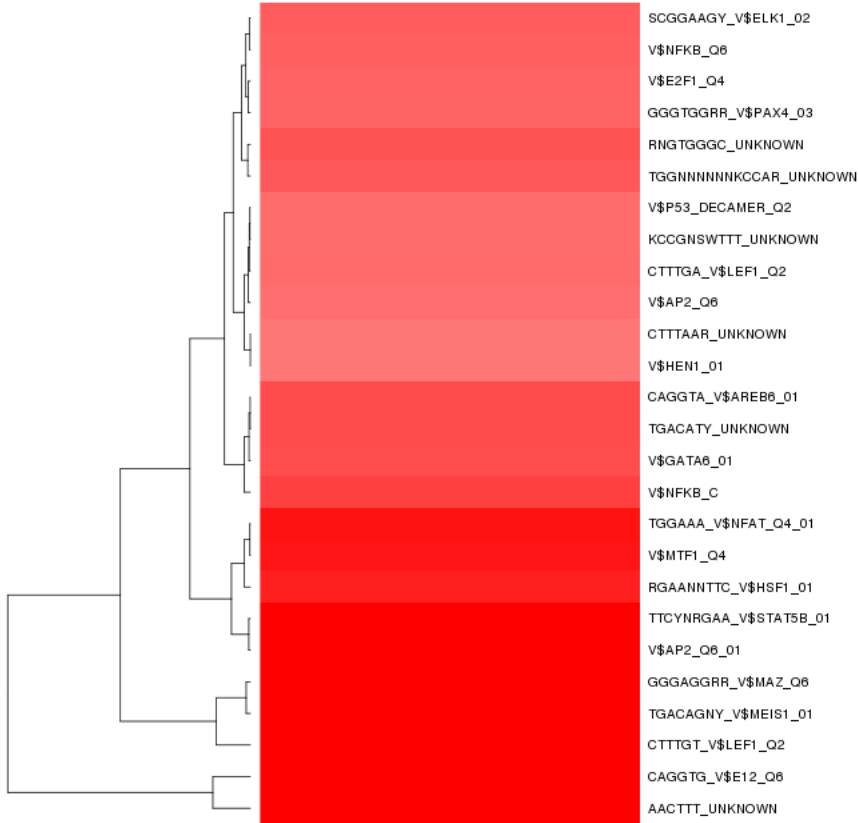

TF zscore:

## Error: subscript out of bounds

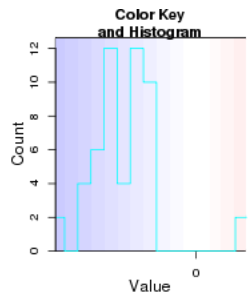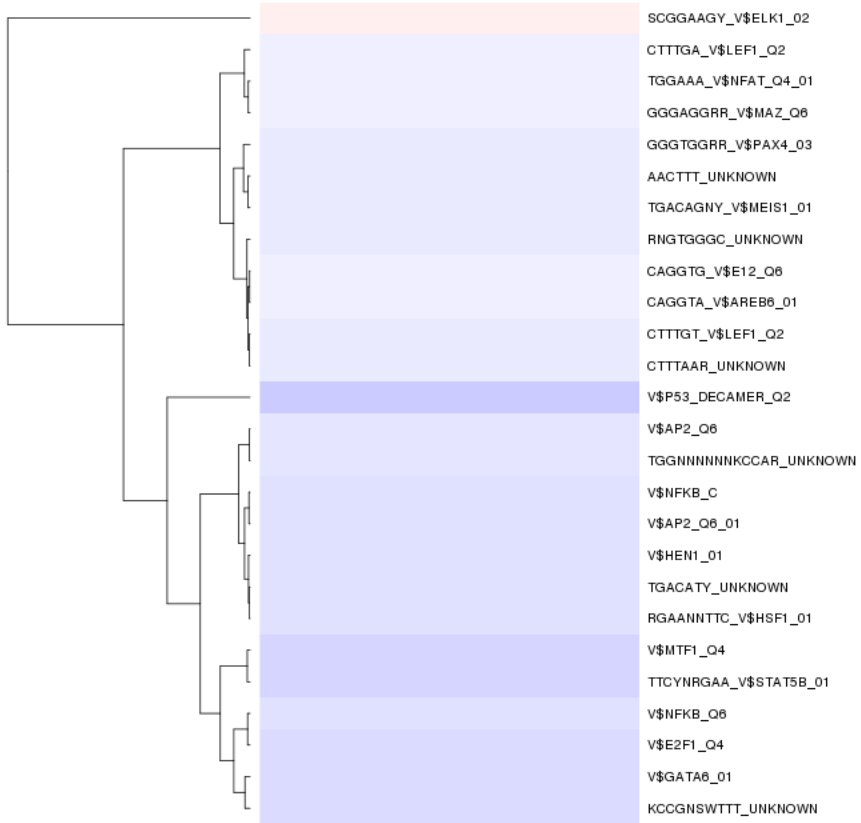

## GO enrichment

Cluster profiler used to call enrichments of significantly differentially regulated genes that map to Entrez IDs.

```
## Error: 'x' and 'units' must have length > 0
```

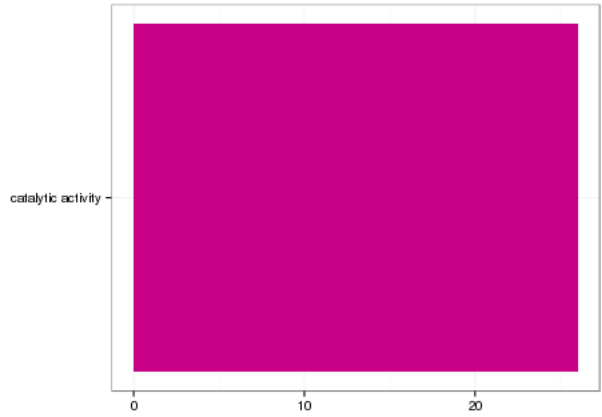

```
## Error: 'x' and 'units' must have length > 0
```

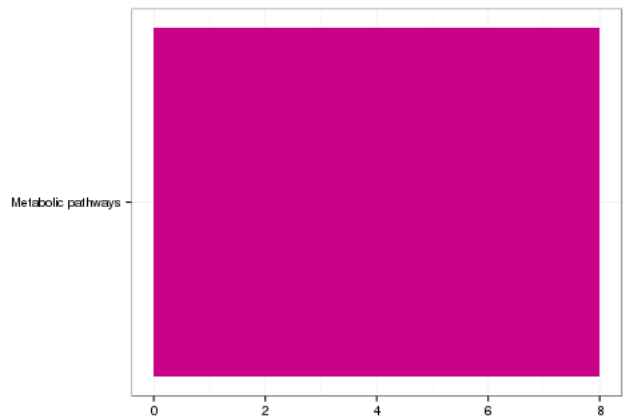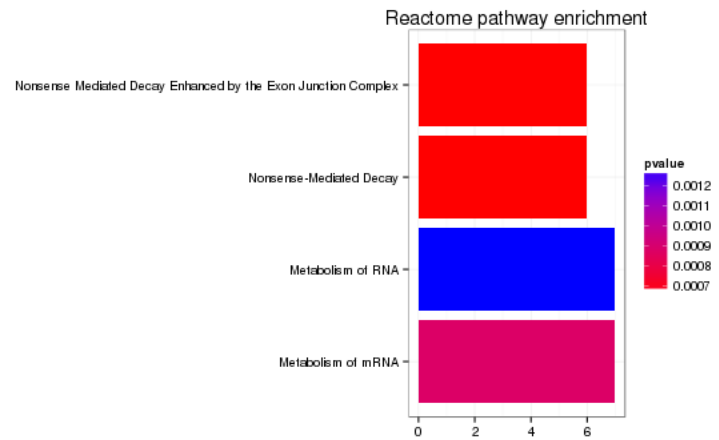

**Enrichment or depletion for stage-specific cell cycle markers**



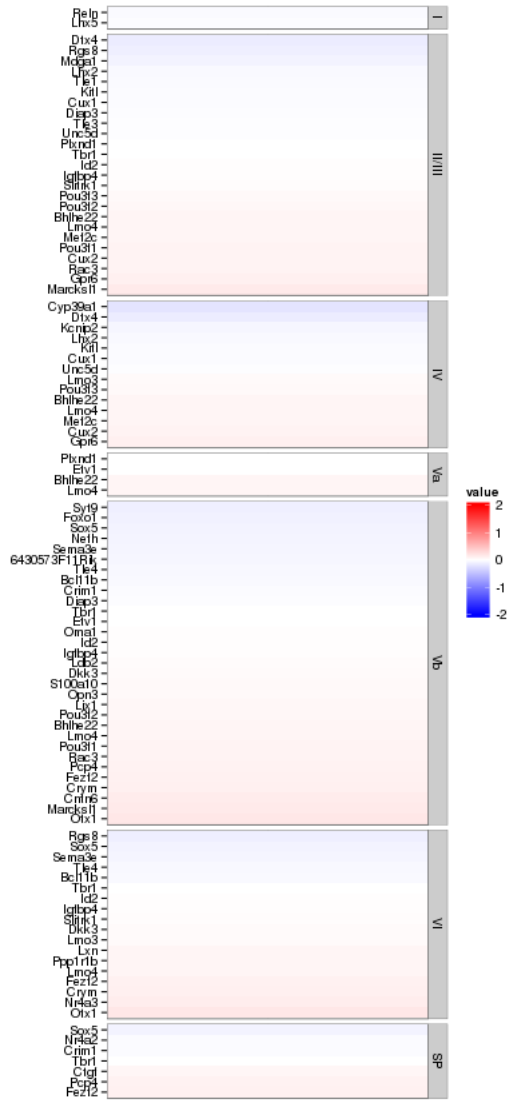

Enrichment or depletion for specific neural cell types

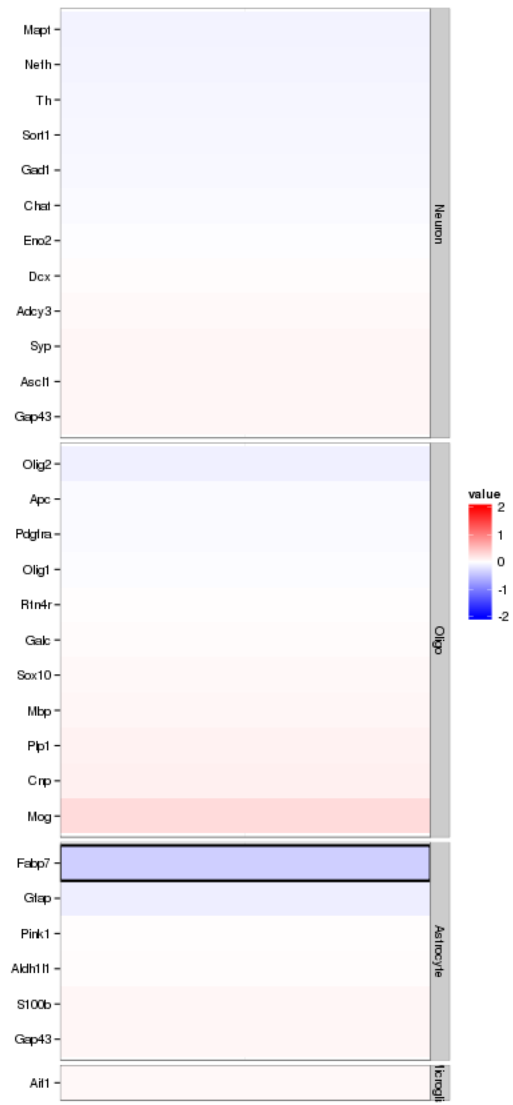

**Enrichment or Depletion of neural differentiation markers**

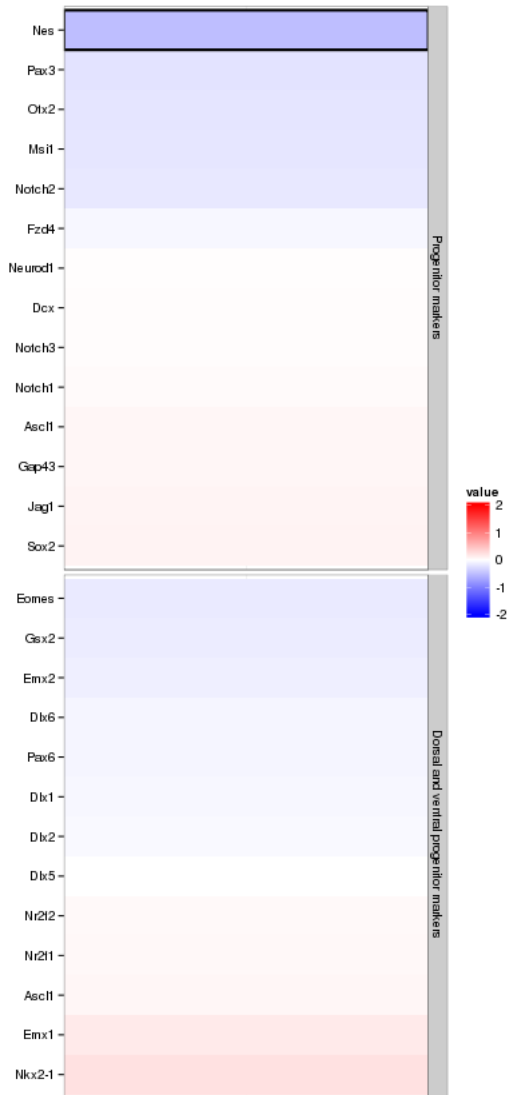

## Cis vs Trans (locally)

$\log_2$  Foldchange and test statistic are calculated with the ratio of  $\text{fpm(KO)}/\text{fpm(WT)}$ , thus the test\_stat is positive if a gene is higher in the KO and negative if a gene has lower expression in the KO

The pvalue for 6 genes significantly regulated in a region this size is: 0.0038

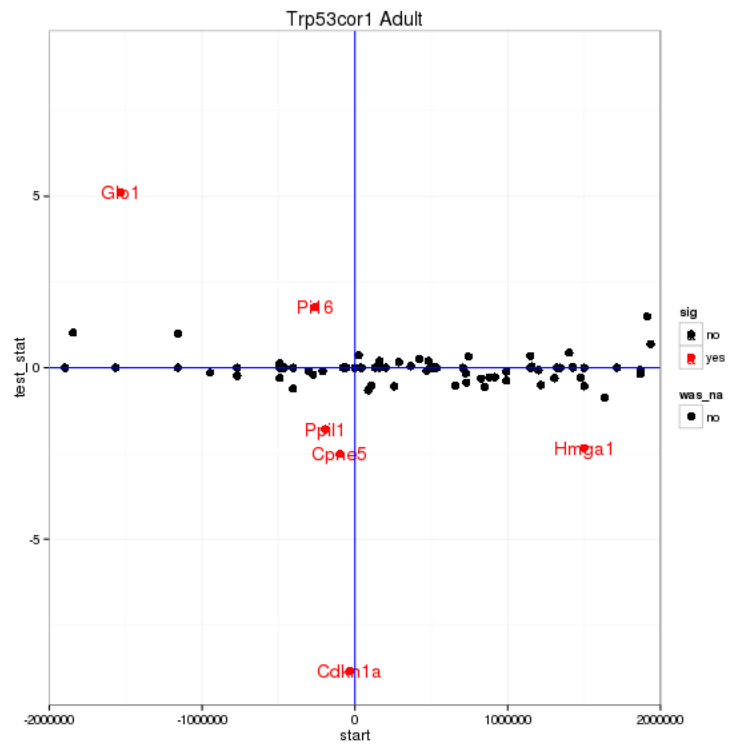

## Notes

Samples used are:

10

- 1 JR729
- 2 JR728
- 3 JR796
- 4 JR797
- 5 JR740
- 6 JR800
- 7 JR827
- 8 JR778
- 9 JR734
- 10 JR802
- 11 JR803
- 12 JR735
- 13 JR785
- 14 JR781



15 JR743  
16 JR786  
17 JR805

## Replicates

| file                                                                          | sample_name | replicate | rep_name   | total_mass  | norm_mass   | internal_scale | external_scale |
|-------------------------------------------------------------------------------|-------------|-----------|------------|-------------|-------------|----------------|----------------|
| 1 /n/rinn_data1/seq/fgoff/Projects/BrainMap/data/quants/JR729/abundances.cxb  | WT          | 0         | WT_0       | 26334400.00 | 34671700.00 | 0.76           | 1.00           |
| 2 /n/rinn_data1/seq/fgoff/Projects/BrainMap/data/quants/JR728/abundances.cxb  | WT          | 1         | WT_1       | 20329200.00 | 34671700.00 | 0.58           | 1.00           |
| 3 /n/rinn_data1/seq/fgoff/Projects/BrainMap/data/quants/JR796/abundances.cxb  | WT          | 2         | WT_2       | 34089000.00 | 34671700.00 | 0.98           | 1.00           |
| 4 /n/rinn_data1/seq/fgoff/Projects/BrainMap/data/quants/JR797/abundances.cxb  | WT          | 3         | WT_3       | 28103300.00 | 34671700.00 | 0.80           | 1.00           |
| 5 /n/rinn_data1/seq/fgoff/Projects/BrainMap/data/quants/JR740/abundances.cxb  | WT          | 4         | WT_4       | 35808200.00 | 34671700.00 | 1.03           | 1.00           |
| 6 /n/rinn_data1/seq/fgoff/Projects/BrainMap/data/quants/JR800/abundances.cxb  | WT          | 5         | WT_5       | 37012200.00 | 34671700.00 | 1.07           | 1.00           |
| 7 /n/rinn_data1/seq/fgoff/Projects/BrainMap/data/quants/JR827/abundances.cxb  | WT          | 6         | WT_6       | 27786600.00 | 34671700.00 | 0.81           | 1.00           |
| 8 /n/rinn_data1/seq/fgoff/Projects/BrainMap/data/quants/JR778/abundances.cxb  | WT          | 7         | WT_7       | 39541900.00 | 34671700.00 | 1.15           | 1.00           |
| 9 /n/rinn_data1/seq/fgoff/Projects/BrainMap/data/quants/JR734/abundances.cxb  | WT          | 8         | WT_8       | 34480600.00 | 34671700.00 | 1.01           | 1.00           |
| 10 /n/rinn_data1/seq/fgoff/Projects/BrainMap/data/quants/JR802/abundances.cxb | WT          | 9         | WT_9       | 45467400.00 | 34671700.00 | 1.30           | 1.00           |
| 11 /n/rinn_data1/seq/fgoff/Projects/BrainMap/data/quants/JR803/abundances.cxb | WT          | 10        | WT_10      | 52130400.00 | 34671700.00 | 1.50           | 1.00           |
| 12 /n/rinn_data1/seq/fgoff/Projects/BrainMap/data/quants/JR735/abundances.cxb | WT          | 11        | WT_11      | 34994400.00 | 34671700.00 | 1.02           | 1.00           |
| 13 /n/rinn_data1/seq/fgoff/Projects/BrainMap/data/quants/JR785/abundances.cxb | WT          | 12        | WT_12      | 34173600.00 | 34671700.00 | 0.97           | 1.00           |
| 14 /n/rinn_data1/seq/fgoff/Projects/BrainMap/data/quants/JR781/abundances.cxb | WT          | 13        | WT_13      | 41538900.00 | 34671700.00 | 1.21           | 1.00           |
| 15 /n/rinn_data1/seq/fgoff/Projects/BrainMap/data/quants/JR743/abundances.cxb | Trp53cor    | 0         | Trp53cor_0 | 32358500.00 | 34671700.00 | 0.94           | 1.00           |
| 16 /n/rinn_data1/seq/fgoff/Projects/BrainMap/data/quants/JR786/abundances.cxb | Trp53cor    | 1         | Trp53cor_1 | 38185400.00 | 34671700.00 | 1.10           | 1.00           |
| 17 /n/rinn_data1/seq/fgoff/Projects/BrainMap/data/quants/JR805/abundances.cxb | Trp53cor    | 2         | Trp53cor_2 | 41355100.00 | 34671700.00 | 1.19           | 1.00           |

## Session Info

```
## R version 3.0.2 (2013-09-25)
## Platform: x86_64-unknown-linux-gnu (64-bit)
##
## locale:
## [1] LC_CTYPE=en_US.UTF-8      LC_NUMERIC=C
## [3] LC_TIME=en_US.UTF-8      LC_COLLATE=en_US.UTF-8
## [5] LC_MONETARY=en_US.UTF-8  LC_MESSAGES=en_US.UTF-8
## [7] LC_PAPER=en_US.UTF-8     LC_NAME=C
## [9] LC_ADDRESS=C             LC_TELEPHONE=C
## [11] LC_MEASUREMENT=en_US.UTF-8 LC_IDENTIFICATION=C
##
## attached base packages:
## [1] grid      parallel  methods  stats    graphics grDevices utils
## [8] datasets base
##
## other attached packages:
## [1] plyr_1.8.1
## [2] stringr_0.6.2
## [3] seqbias_1.10.0
```

```

## [4] BSgenome.Mmusculus.UCSC.mm10_1.3.19
## [5] BSgenome_1.30.0
## [6] Biostrings_2.30.1
## [7] gdata_2.13.3
## [8] GO.db_2.10.1
## [9] org.Mm.eg.db_2.10.1
## [10] clusterProfiler_1.13.1
## [11] DOSE_2.0.0
## [12] ReactomePA_1.6.1
## [13] AnnotationDbi_1.24.0
## [14] Biobase_2.22.0
## [15] mgcv_1.7-29
## [16] nlme_3.1-117
## [17] RMySQL_0.9-3
## [18] RColorBrewer_1.0-5
## [19] gridExtra_0.9.1
## [20] gtable_0.1.2
## [21] marray_1.40.0
## [22] gplots_2.13.0
## [23] GSA_1.03
## [24] limma_3.18.13
## [25] xtable_1.7-3
## [26] cummeRbund_2.7.2
## [27] Gviz_1.6.0
## [28] rtracklayer_1.22.7
## [29] GenomicRanges_1.14.4
## [30] XVector_0.2.0
## [31] IRanges_1.20.7
## [32] fastcluster_1.1.13
## [33] reshape2_1.4
## [34] ggplot2_1.0.0
## [35] RSQLite_0.11.4
## [36] DBI_0.2-7
## [37] BiocGenerics_0.8.0
## [38] knitr_1.6
##
## loaded via a namespace (and not attached):
## [1] biomaRt_2.18.0      biovizBase_1.10.8   bitops_1.0-6
## [4] caTools_1.17        cluster_1.15.2      colorspace_1.2-4
## [7] dichromat_2.0-0     digest_0.6.4        DO.db_2.7
## [10] evaluate_0.5.5      formatR_0.10        Formula_1.1-1
## [13] GenomicFeatures_1.14.5 GOSemSim_1.20.3     graph_1.40.1
## [16] graphite_1.8.1      gtools_3.4.1        Hmisc_3.14-4
## [19] igraph_0.7.1        KEGG.db_2.10.1      KernSmooth_2.23-12
## [22] labeling_0.2        lattice_0.20-29     latticeExtra_0.6-26
## [25] MASS_7.3-33         Matrix_1.1-3        munsell_0.4.2
## [28] org.Hs.eg.db_2.10.1 proto_0.3-10        qvalue_1.36.0
## [31] Rcpp_0.11.2         RCurl_1.95-4.1      reactome.db_1.46.1
## [34] Rsamtools_1.14.3    scales_0.2.4        splines_3.0.2
## [37] stats4_3.0.2        survival_2.37-7     tcltk_3.0.2
## [40] tools_3.0.2         XML_3.98-1.1        zlibbioc_1.8.0

```

## Run Info

```
##          param
## 1      cmd_line
## 2          version
## 3  SVN_revision
## 4  boost_version
## 5          genome
##
## 1 cuffdiff -p 10 -L WT,Trp53cor -o /n/rinn_data1/seq/lgoff/Projects/BrainMap/data/diffs/Trp53cor_vs_WT_Adult /n/rinn_data1/seq/lgoff/Projects/BrainMap/c
## 2
## 3
## 4
## 5
```

# Trp53cor1 KO vs WT (Embryonic)

This file shows the wt-v-ko comparison for Trp53cor1.

Cuff overview:

```
## CuffSet instance with:  
## 2 samples  
## 26754 genes  
## 77524 isoforms  
## 0 TSS  
## 23066 CDS  
## 0 promoters  
## 0 splicing  
## 19954 relCDS
```

## QC

### Dispersion

Dispersion plot for genes in cuff: (Overdispersion can lead to innacurate quants)

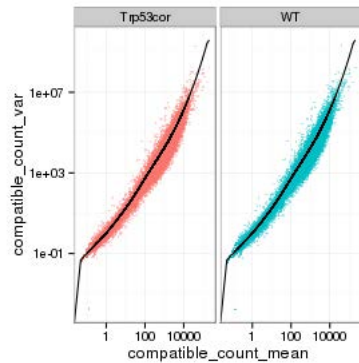

### Cross-replicate variability (fpkmSCVplot)

Differences in CV 2 can result in lower numbers of differentially expressed genes due to a higher degree of variability between replicate fpkm estimates.

Genes:

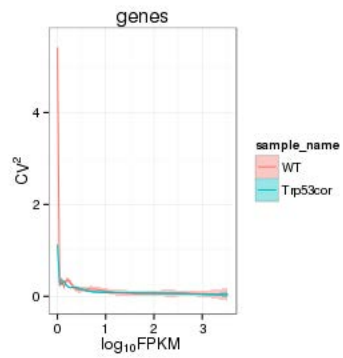

Isoforms:

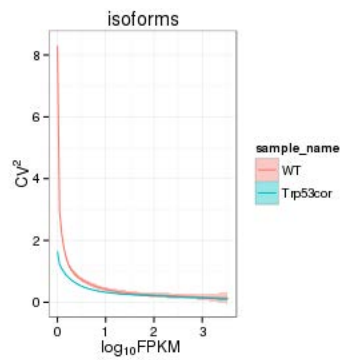

## MvA plot

```
## Error: non-numeric argument to binary operator
```

## MvA plot counts

```
## Error: non-numeric argument to binary operator
```

## Scatterplot matrix

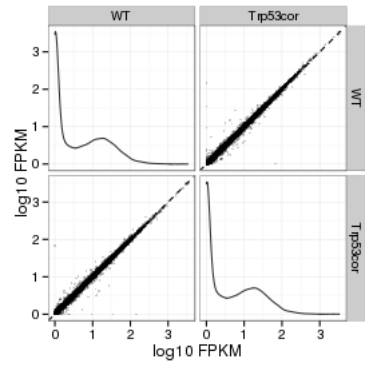

## Distributions

### Boxplots

Boxplot (genes)

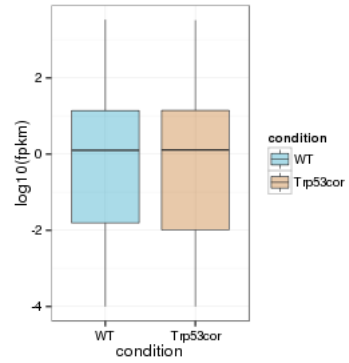

Boxplot (genes, replicates)

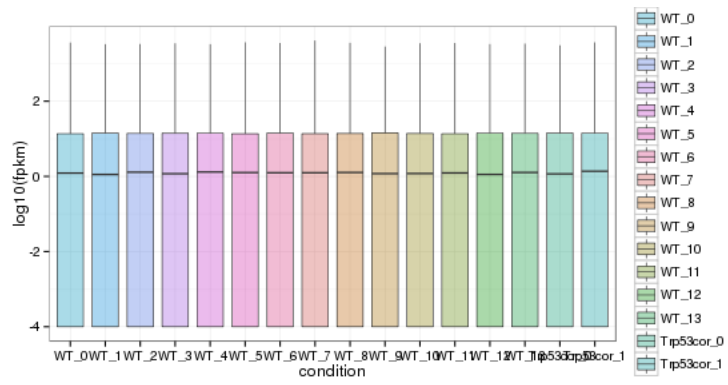

Boxplot (isoforms)

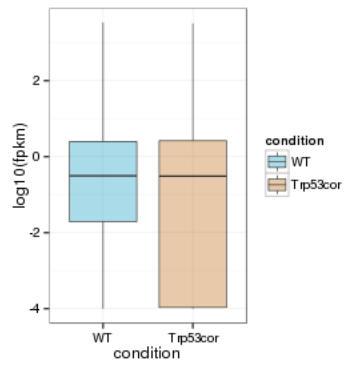

Boxplot (isoforms, replicates)

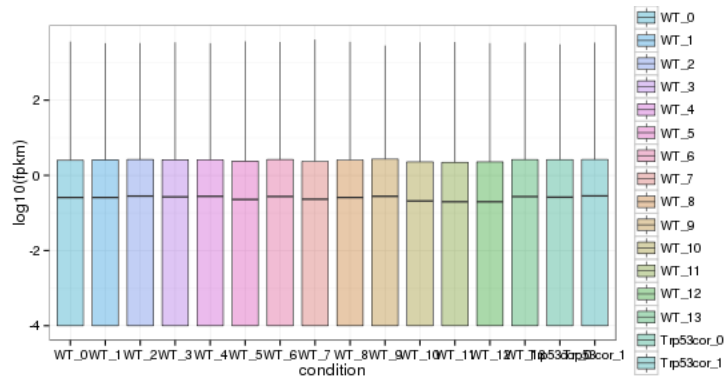

Density

Density (genes)

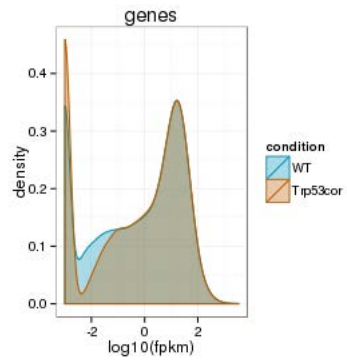

Density (genes, replicates)

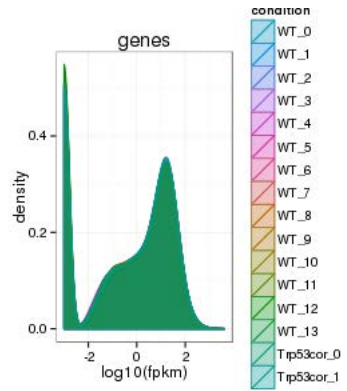

## Clustering

### Replicate Clusters



All genes(cuff)

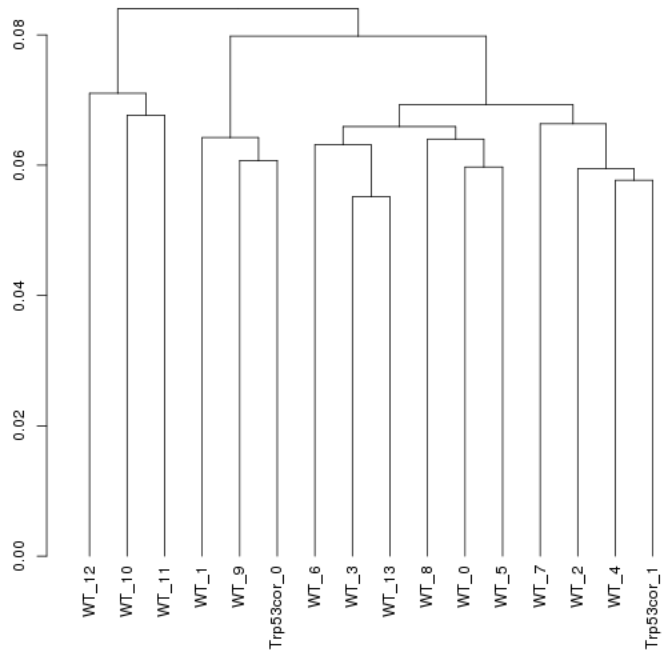

## NULL

PCA (genes)

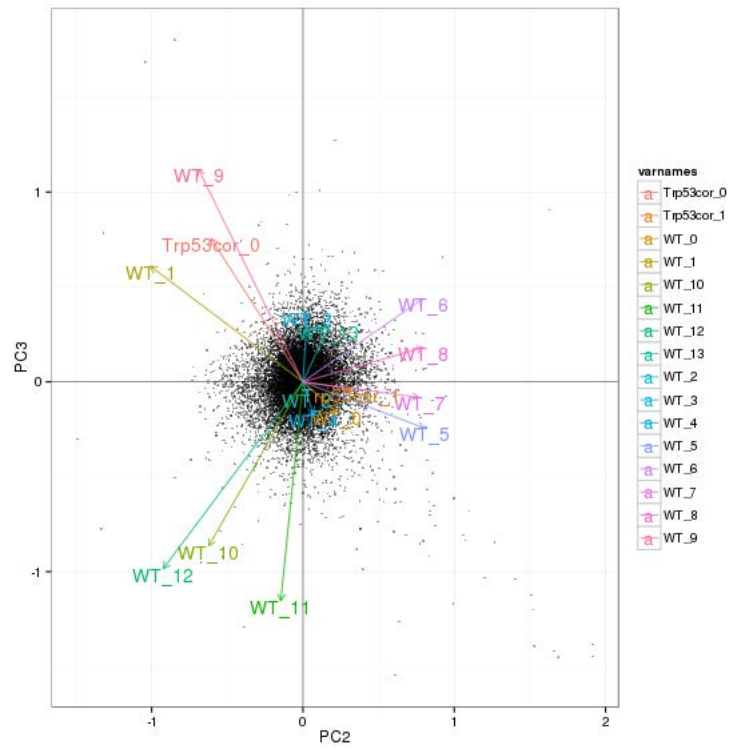

**MDS (genes)**

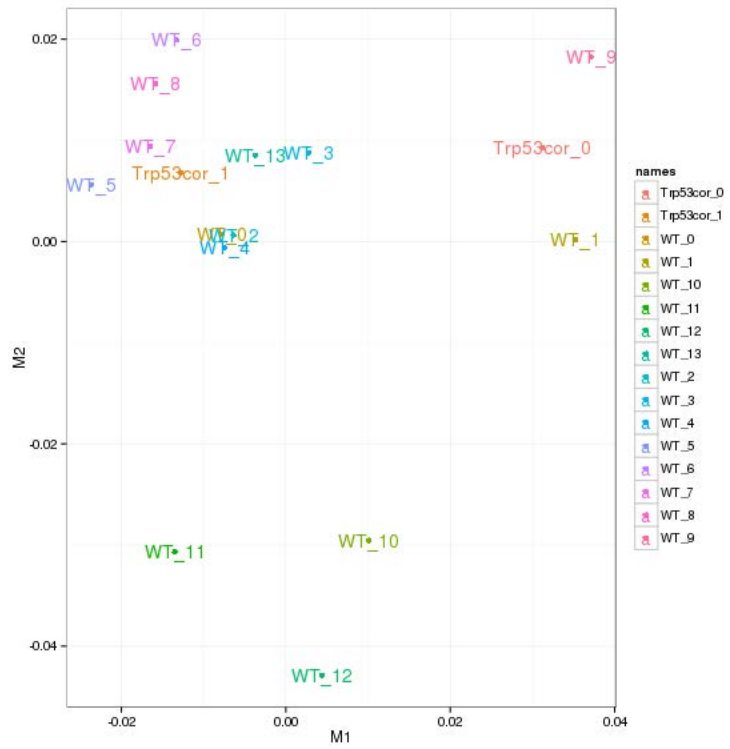

**KO assessment**  
**Endogenous IncRNA expression**

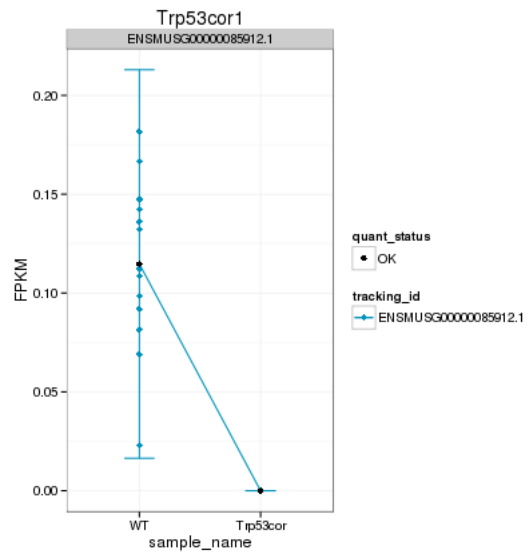

Endogenous expression of Trp53cor1 isoforms:

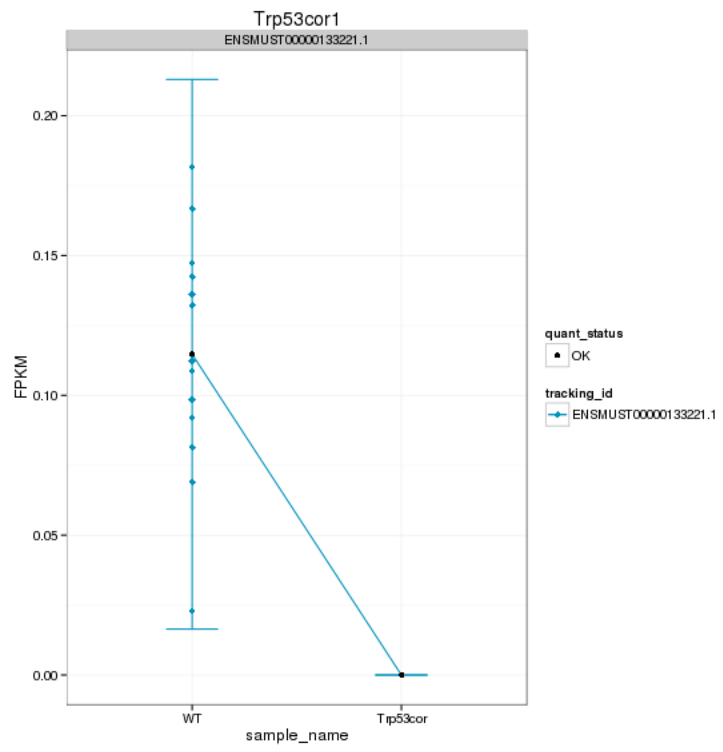

Barplot of gene expression:

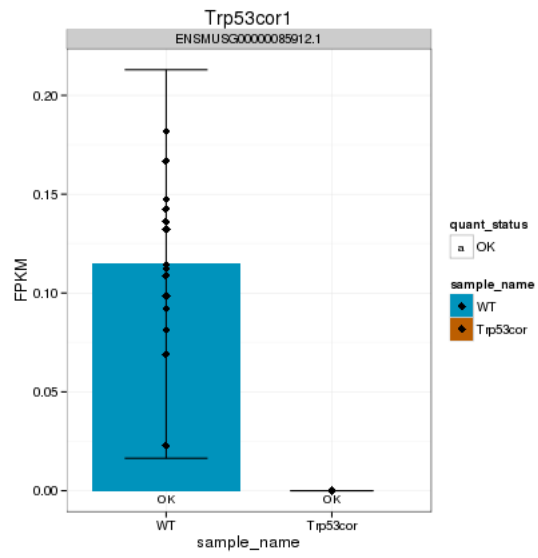

Barplot of isoform expression:

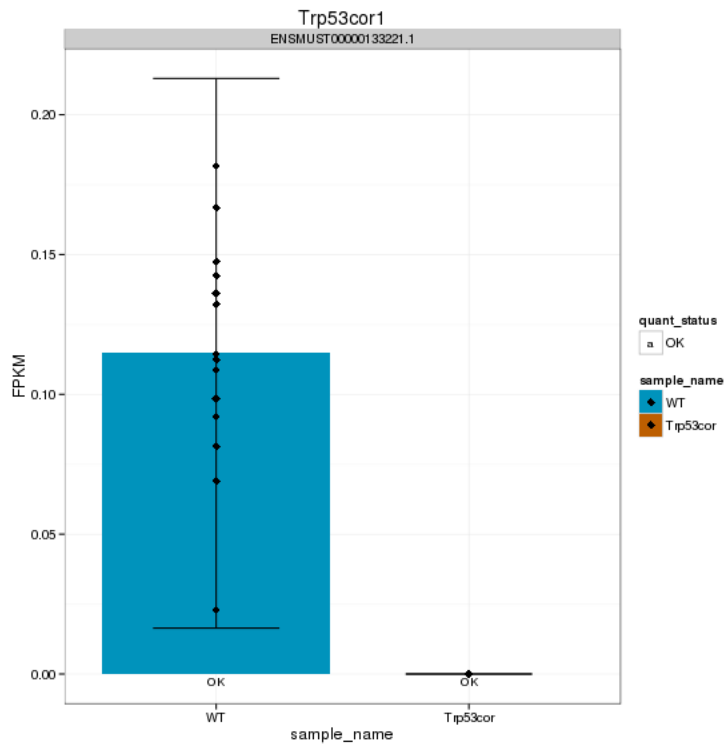

## LacZ expression

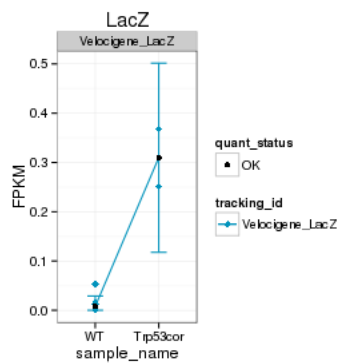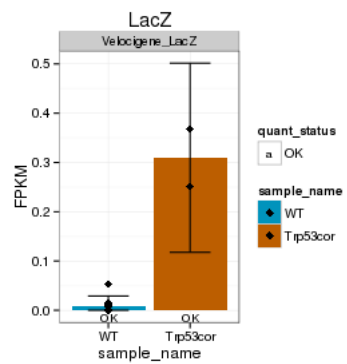

## Digital Genotyping (LacZ vs Endogenous lincRNA and Sex)

Eif2s3y is a y-expressed gene, Xist is an x-expressed gene Expression plot (endogenous linc, lacZ, Y-expressed gene):

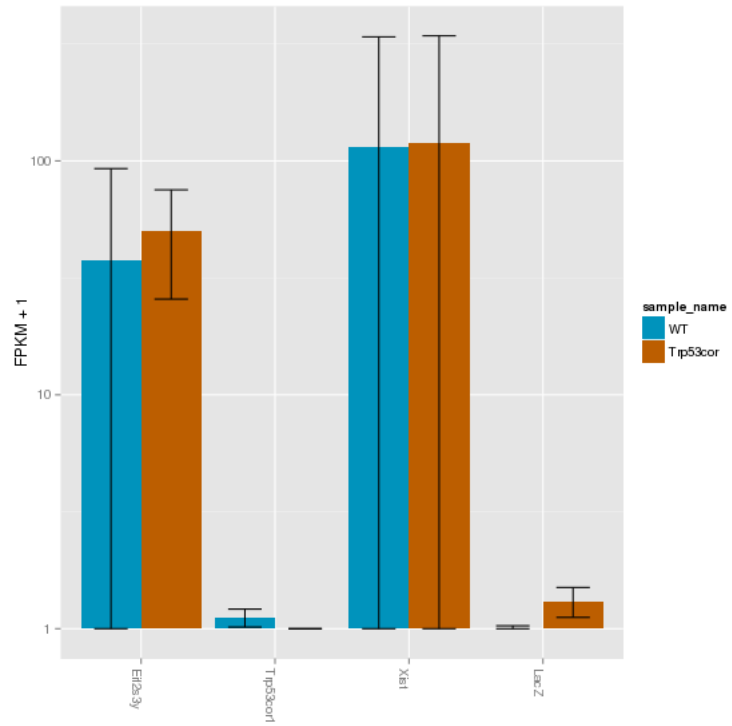

Expression heatmap:

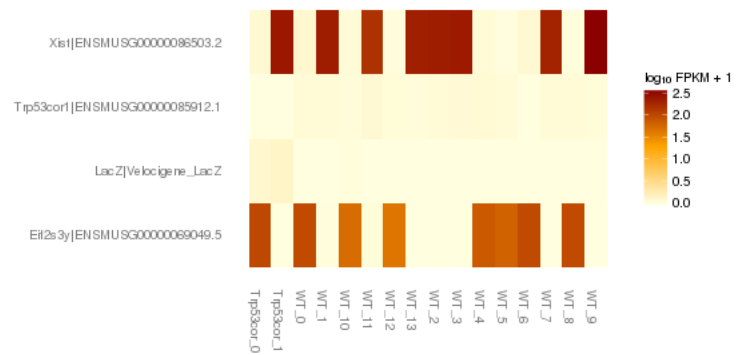

Track visualization

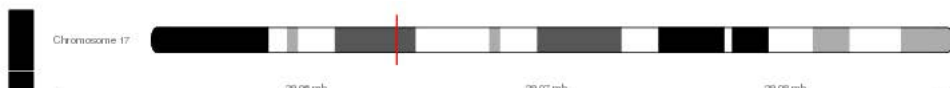



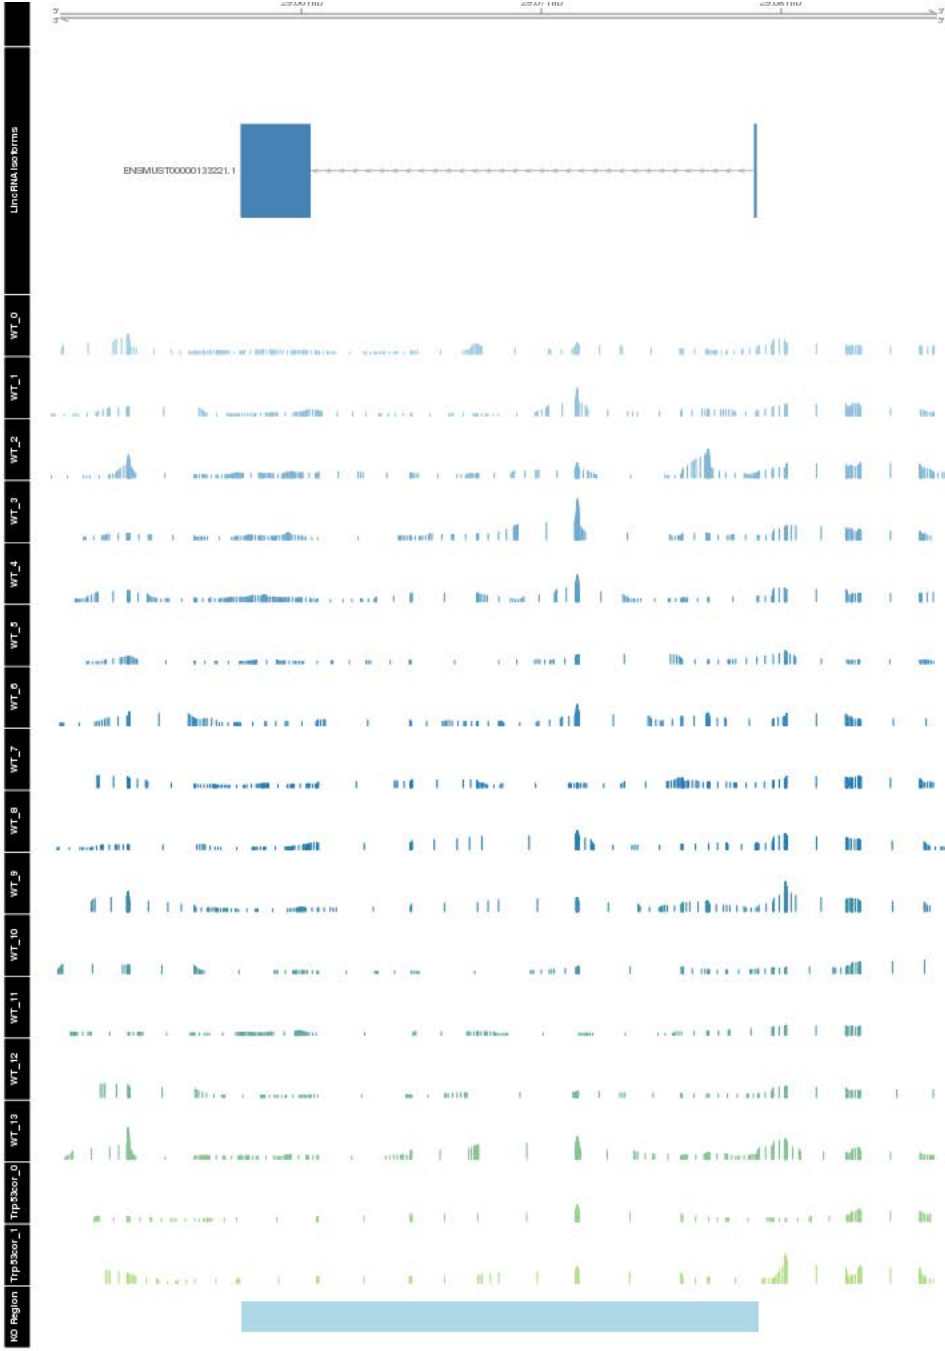

# Differential Analysis

## Differential Genes

```
## Error: RS-DBI driver: (error in statement: near ")": syntax error)
```

```
## Error: error in evaluating the argument 'object' in selecting a method for function 'annotation': Error: object 'sigGenes' not found
```

There are 0 significantly differentially expressed genes. They are:

```
[1] "No sig genes!"
```

### Matrix of gene significant differences between conditions

(skip for Brainmap wt-v-ko comparisons)

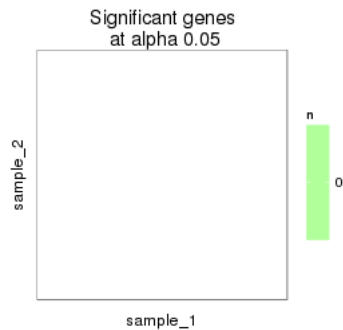

### Significant gene expression differences between conditions

Expression plot (genes):(turned off)

```
## Error: error in evaluating the argument 'object' in selecting a method for function 'csHeatmap': Error: object 'sigGenes' not found
```

Significant genes with expression >50fpkm (any condition):(turned off)

An individual look at each of the highly expressed significantly differentially regulated genes: (eval=false for first pass)

### Expression-level/significance relationship

Scatter plot of significant genes only:

```
## Error: error in evaluating the argument 'object' in selecting a method for function 'csScatter': Error: object 'sigGenes' not found
```

Volcano Plot

```
## Error: One or more values of 'x' or 'y' are not valid sample names!
```

Volcano plot with significant genes only:

```
## Error: error in evaluating the argument 'object' in selecting a method for function 'csvolcano': Error: object 'sigGenes' not found
```

FoldChange Heatmap

```
## Error: error in evaluating the argument 'object' in selecting a method for function 'csFoldChangeHeatmap': Error: object 'sigGenes' not found
```

## Differential Splicing

### Differential Isoforms between conditions

Per isoform difference between conditions:

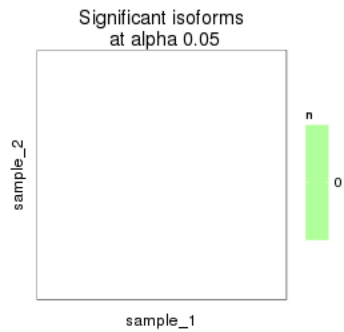

These isoforms are:

```
[1] "no sig isoforms"
```

Gene-level DE isoform heatmap

```
## [1] "no sig isoforms"
```

Isoform foldchange heatmap by isoform:

```
## [1] "no sig isoforms"
```

### Differential Splicing between conditions

(eval false for first pass)

Per condition differences in isoforms (Does gene have diff piechart between conditions?)

These genes are:

Splicing heatmap by isoform:

Splicing heatmap by gene

The following are significantly differentially spliced genes (relative portion of isoform per condition):

## Gene/Pathway Analysis

### GSEA

Enrichment and zscores are calculated based on expression in KO vs WT (fpkmKO/fpkmWT), so genes that are down regulated in KO are shown in blue, while upregulation is shown in red.

KO/WT Blue = down in KO Red = Up in KO

Biocarta enrichment:

```
## Error: `x` must have at least 2 rows and 2 columns
```

Biocarta zscore:

```
## Error: incorrect number of dimensions
```

```
## Error: object 'x_ordered' not found
```

```
## Error: error in evaluating the argument 'x' in selecting a method for function 'as.matrix': Error: object 'x_ordered' not found
```

```
## Error: object 'x_ordered' not found
```

Reactome enrichment:

```
## Error: subscript out of bounds
```

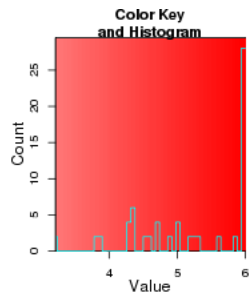

\_\_\_\_\_

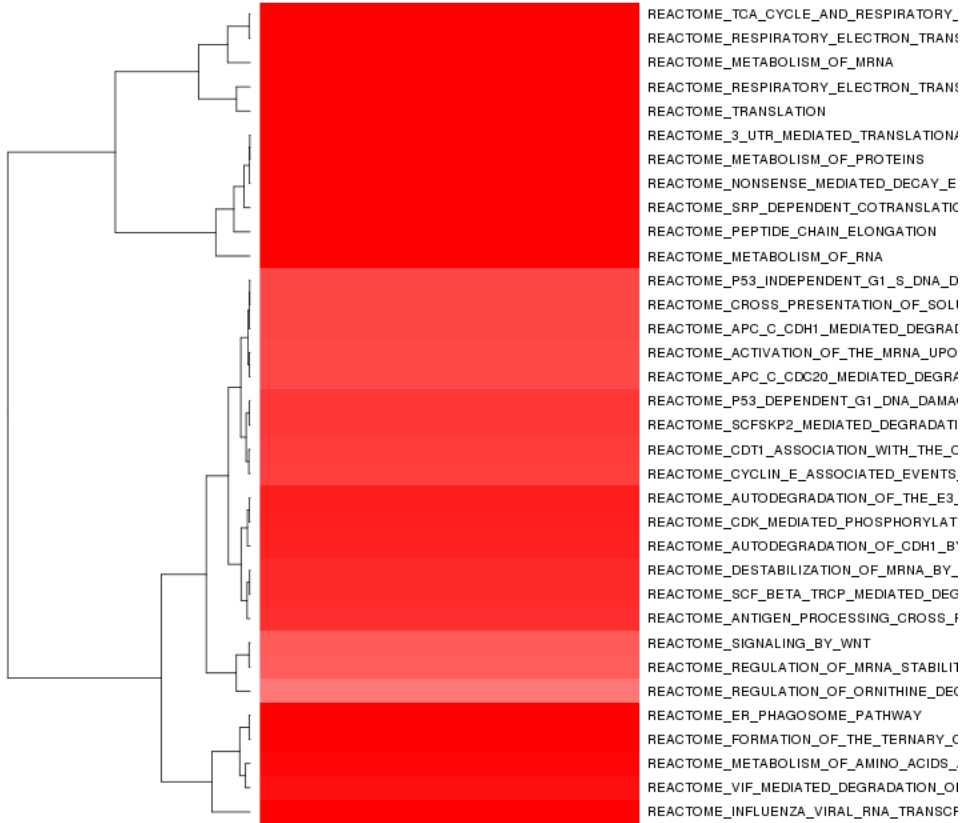

Reactome zscore:

## Error: subscript out of bounds

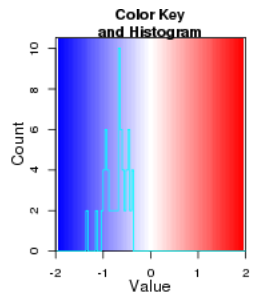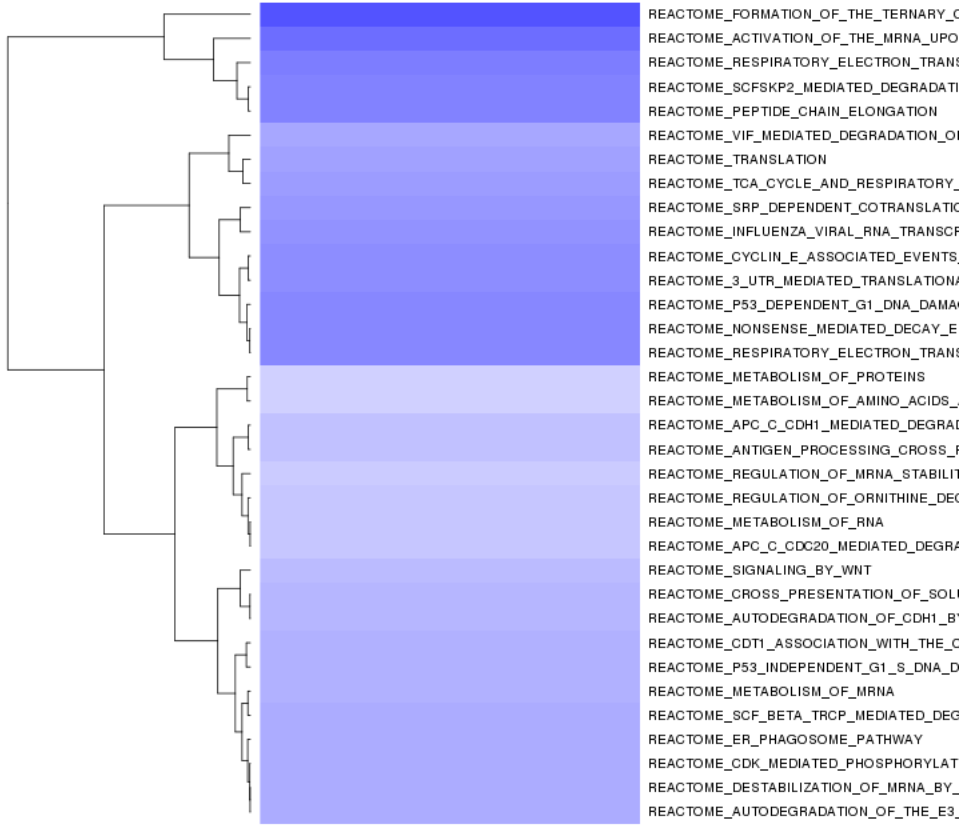

Kegg enrichment:

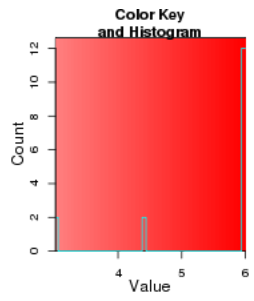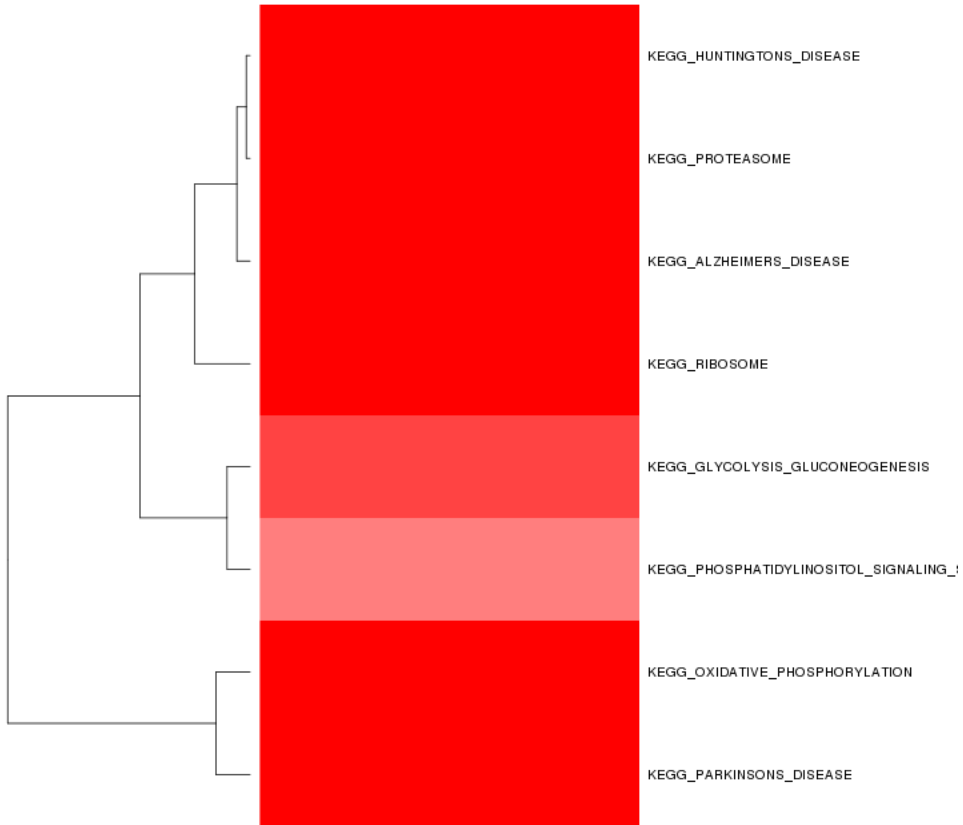

Kegg zscore:

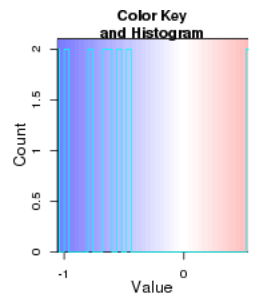

\_\_\_\_\_

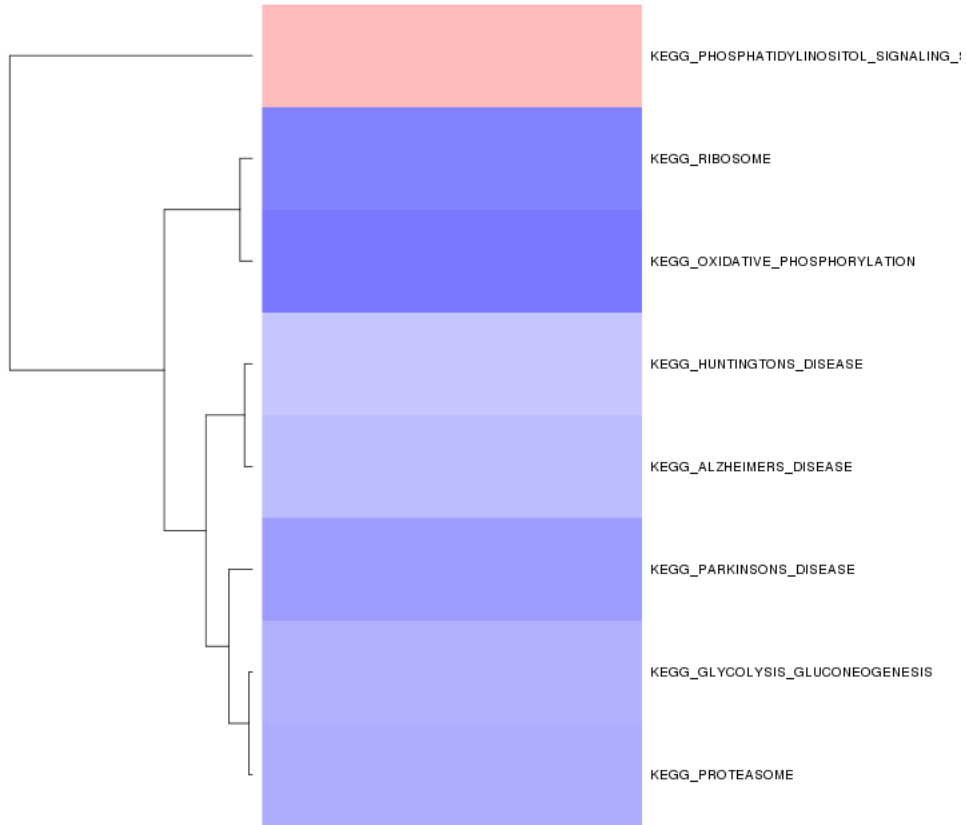

Interneuron enrichment:

## Error: no locations are finite





5HT\_genes

Lhx6\_genes

Interneuron zscore:

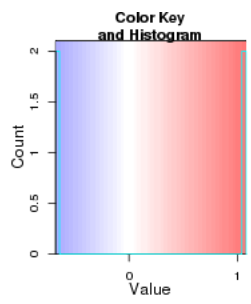

\_\_\_\_\_

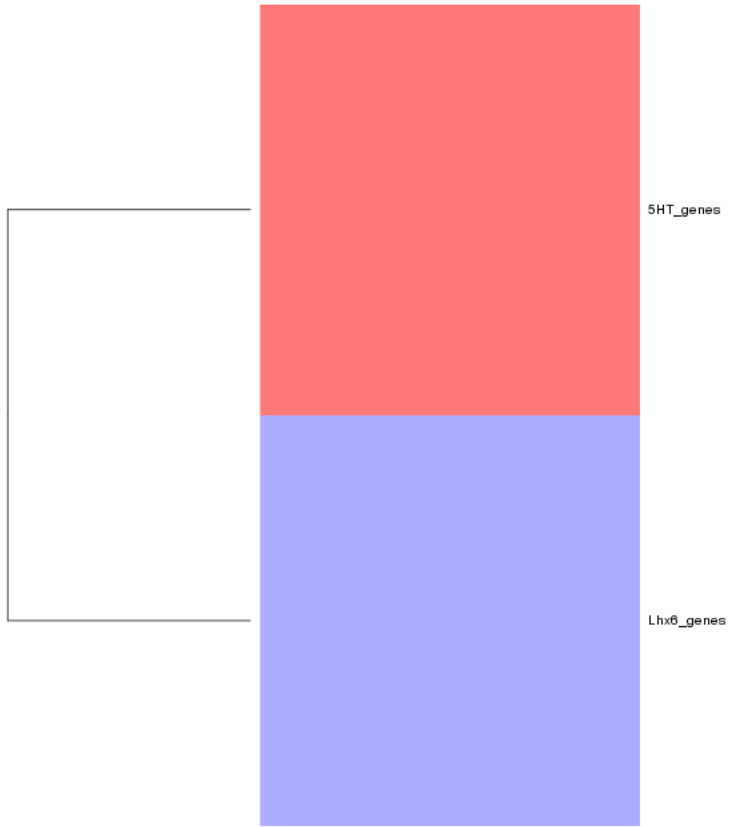

Oncogene enrichment:

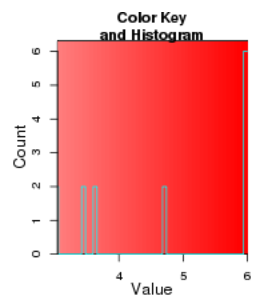

\_\_\_\_\_

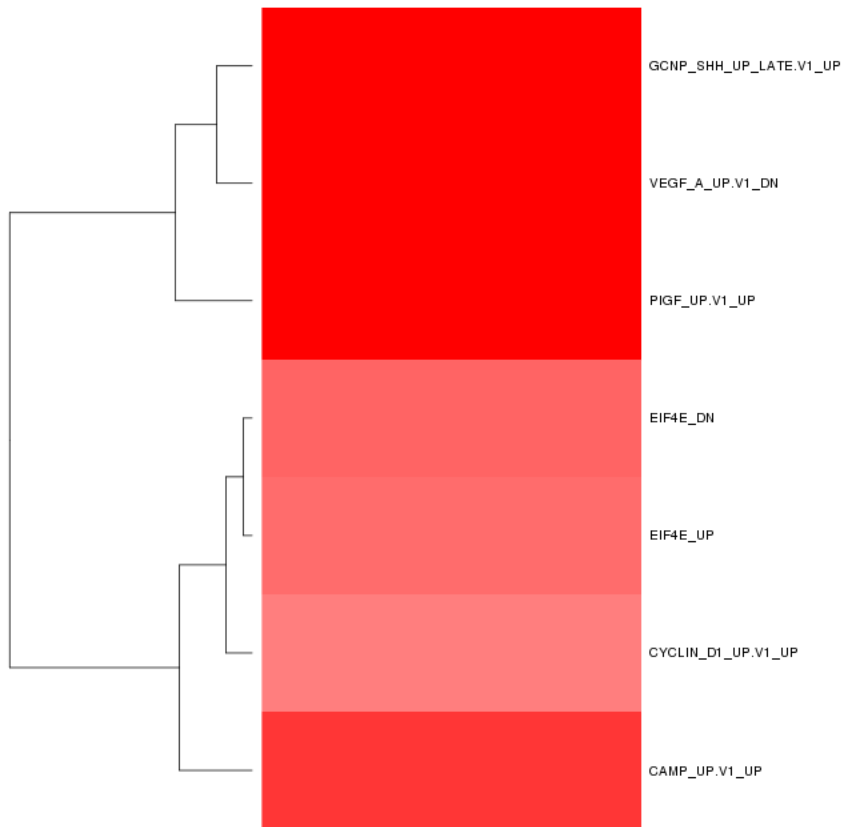

Oncogene zscore:

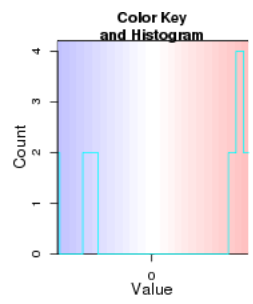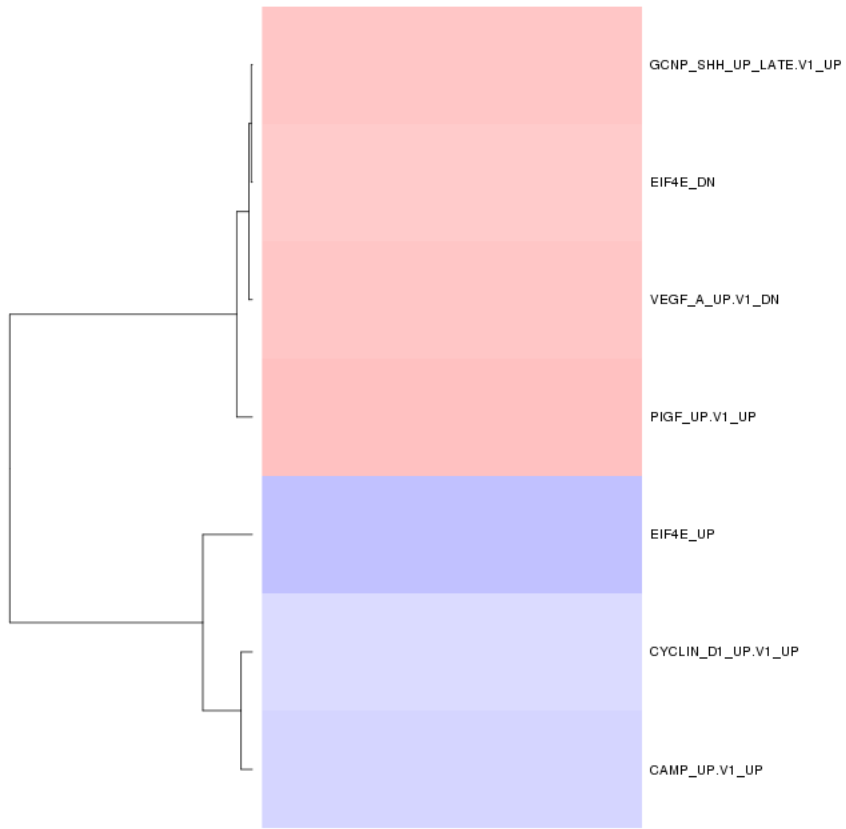

Immuno enrichment:

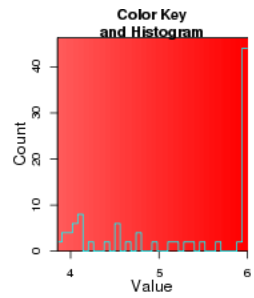

\_\_\_\_\_

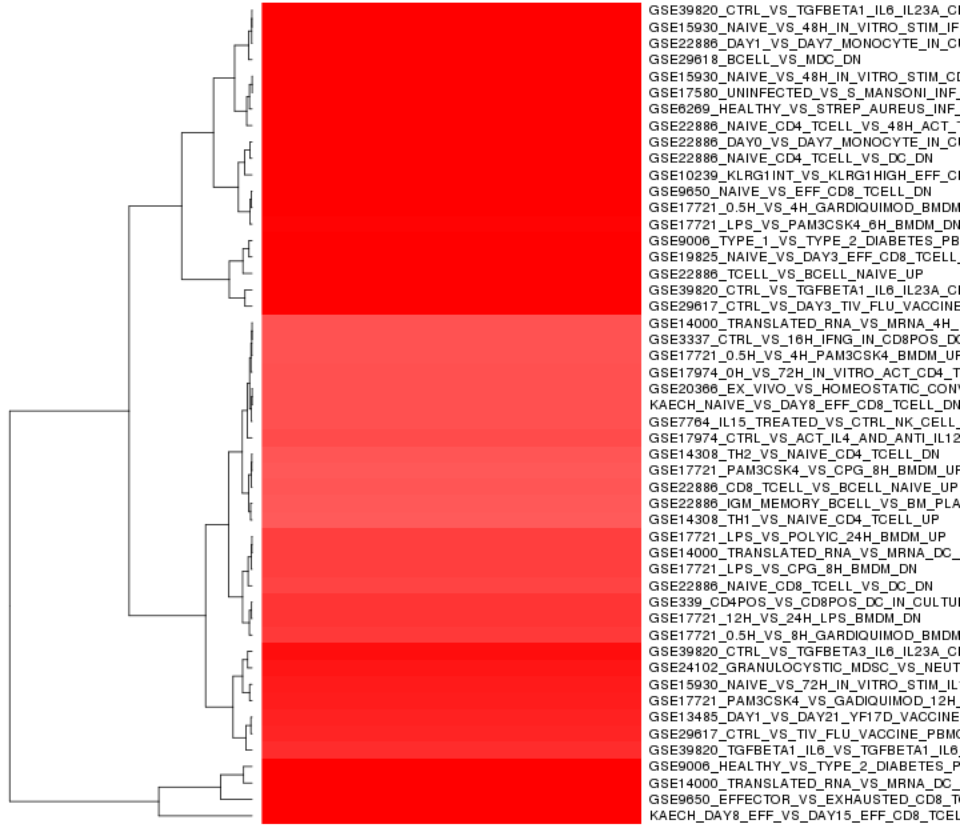

Immuno zscore:

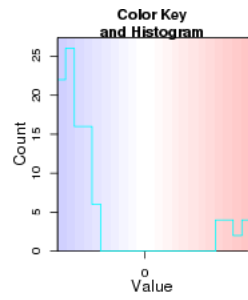

\_\_\_\_\_

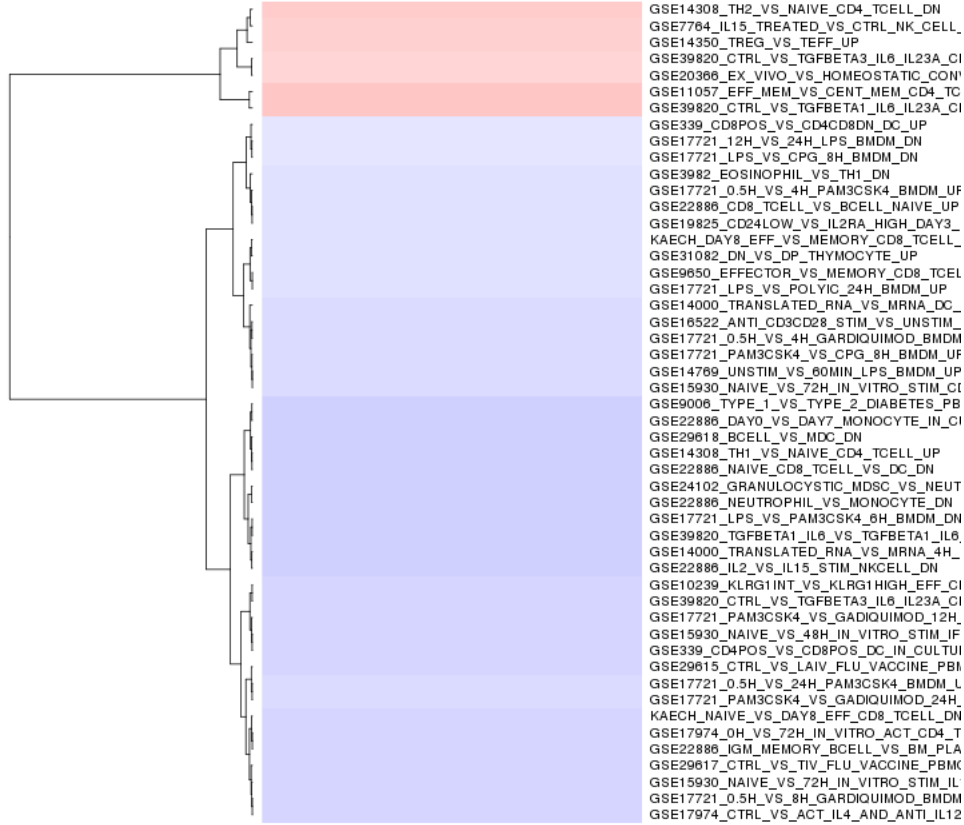

TF enrichment:

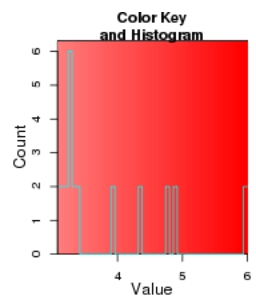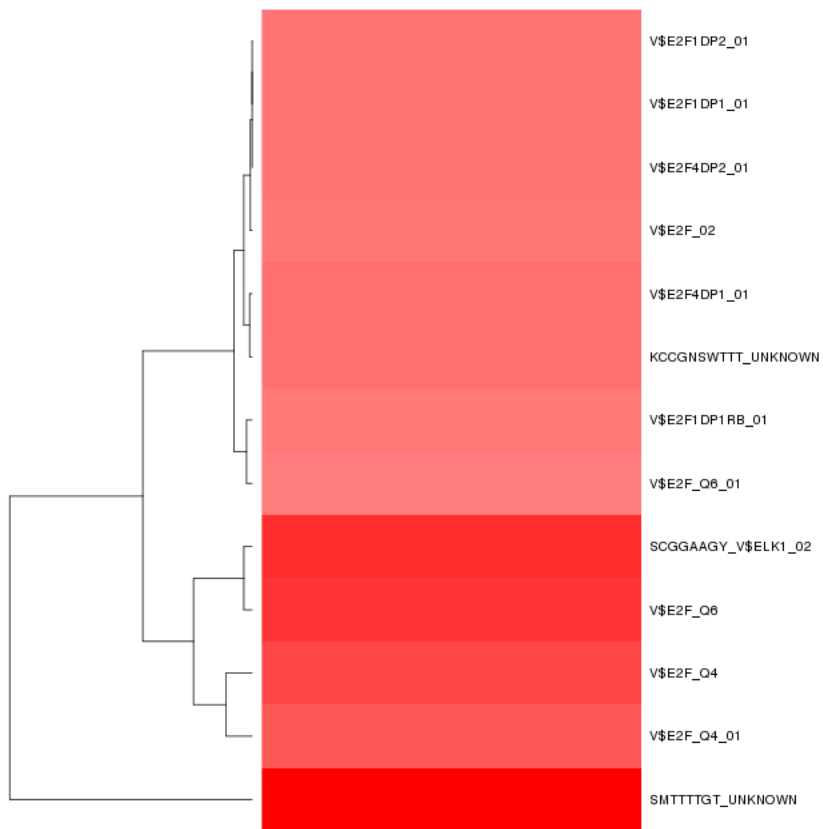

TF zscore:

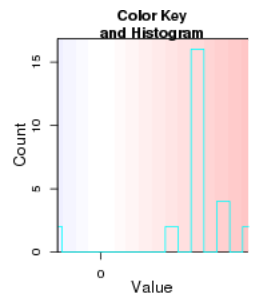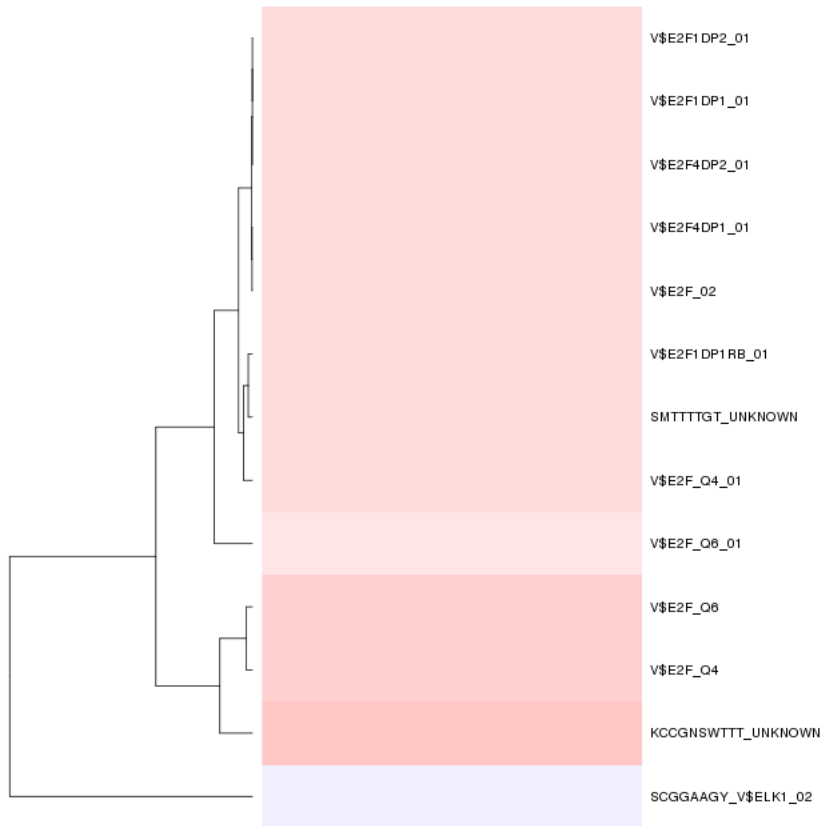

## GO enrichment

Cluster profiler used to call enrichments of significantly differentially regulated genes that map to Entrez IDs.

```
## Error: RS-DBI driver: (error in statement: near ")": syntax error)
```



## Error: error in evaluating the argument 'object' in selecting a method for function 'annotation': Error: object 'sigGenes' not found

## Error: object 'geneAnnot' not found

## Error: error in evaluating the argument 'object' in selecting a method for function 'diffData': Error: object 'sigGenes' not found

## Error: object 'sigDiff' not found

## Error: object 'geneNames' not found

## Error: object 'sigEntrez' not found

## Error: error in evaluating the argument 'x' in selecting a method for function 'unlist': Error: object 'sigEZ' not found

## Error: error in evaluating the argument 'x' in selecting a method for function 'plot': Error: object 'goBP' not found

## Error: error in evaluating the argument 'x' in selecting a method for function 'plot': Error: object 'goMF' not found

## Error: error in evaluating the argument 'x' in selecting a method for function 'plot': Error: object 'goCC' not found

## Error: error in evaluating the argument 'x' in selecting a method for function 'plot': Error: object 'kegg' not found

## Error: error in evaluating the argument 'x' in selecting a method for function 'plot': Error: object 'pathway' not found

## Enrichment or depletion for stage-specific cell cycle markers

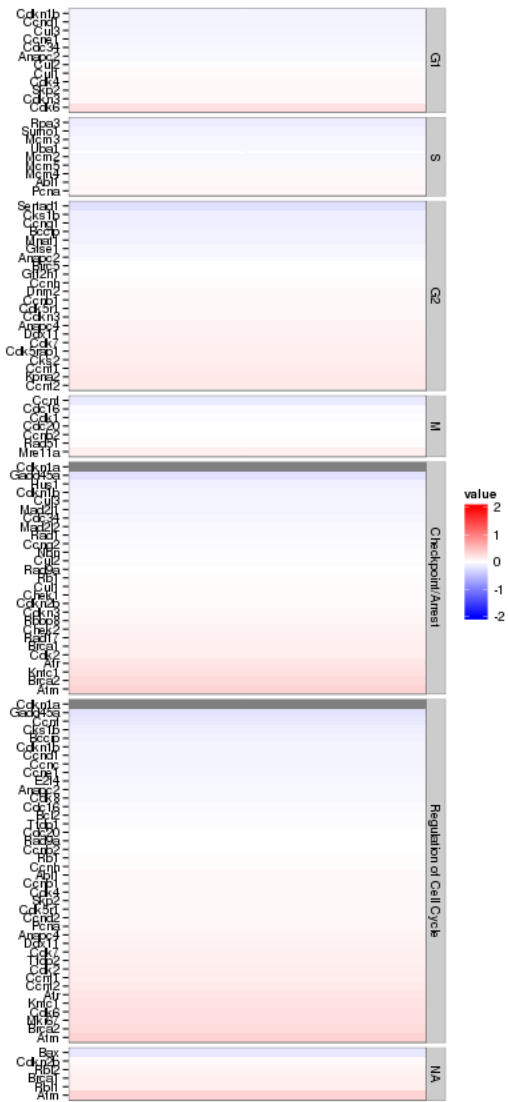

Enrichment or depletion for markers of specific cortical layers

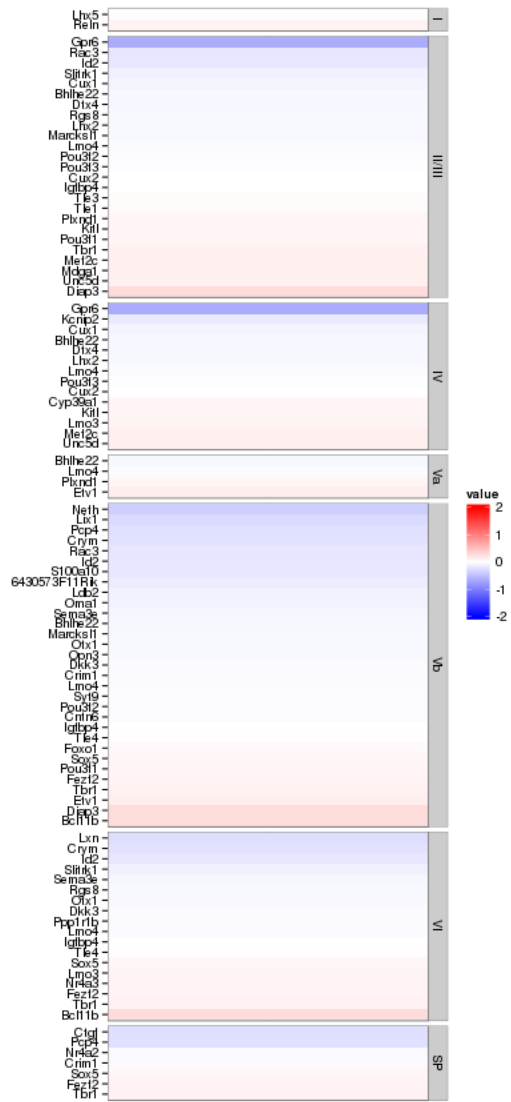

Enrichment or depletion for specific neural cell types

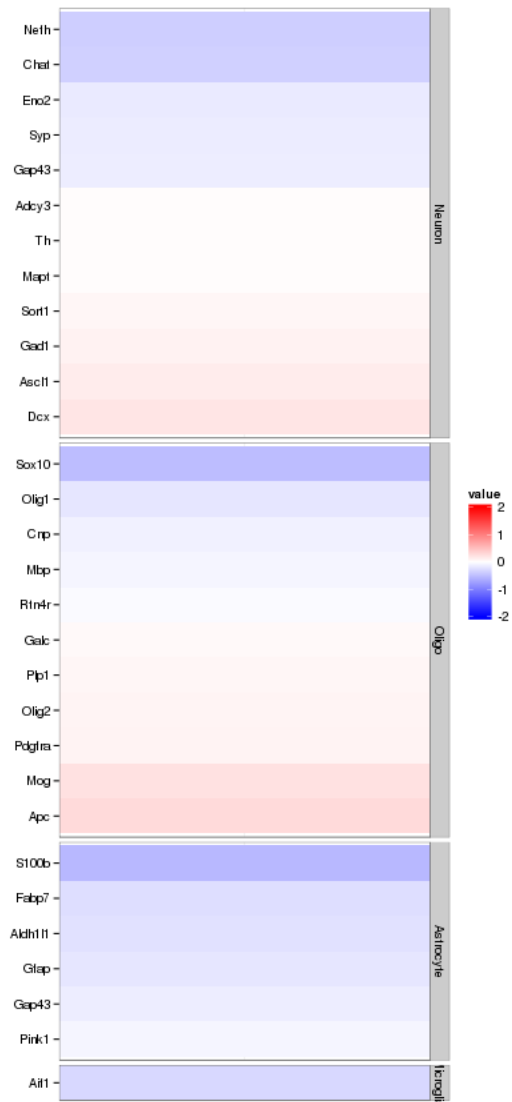

**Enrichment or Depletion of neural differentiation markers**

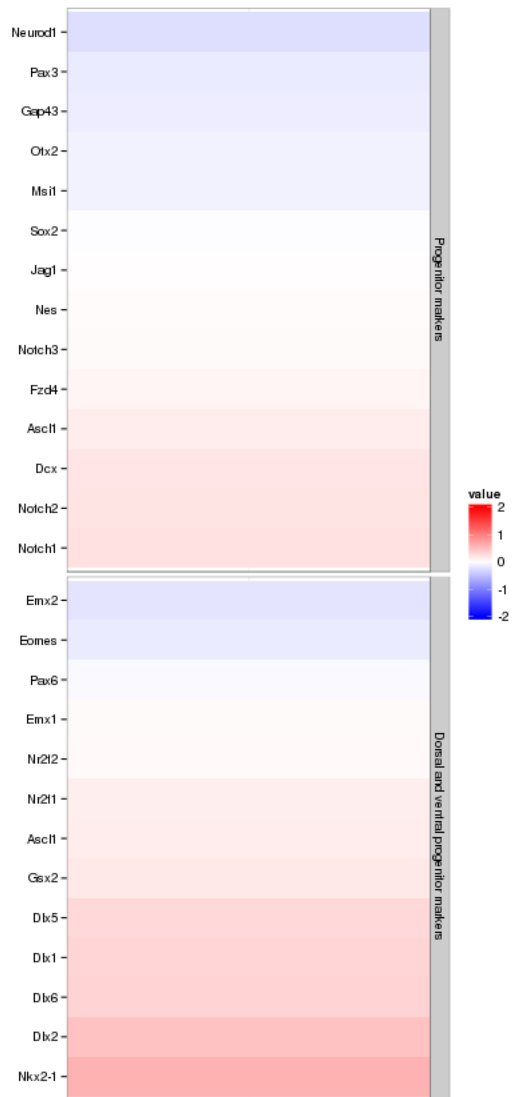

## Cis vs Trans (locally)

$\log_2$  Foldchange and test statistic are calculated with the ratio of  $\text{fpkm(KO)}/\text{fpkm(WT)}$ , thus the  $\text{test\_stat}$  is positive if a gene is higher in the KO and negative if a gene has lower expression in the KO

The pvalue for 0 genes significantly regulated in a region this size is: 1

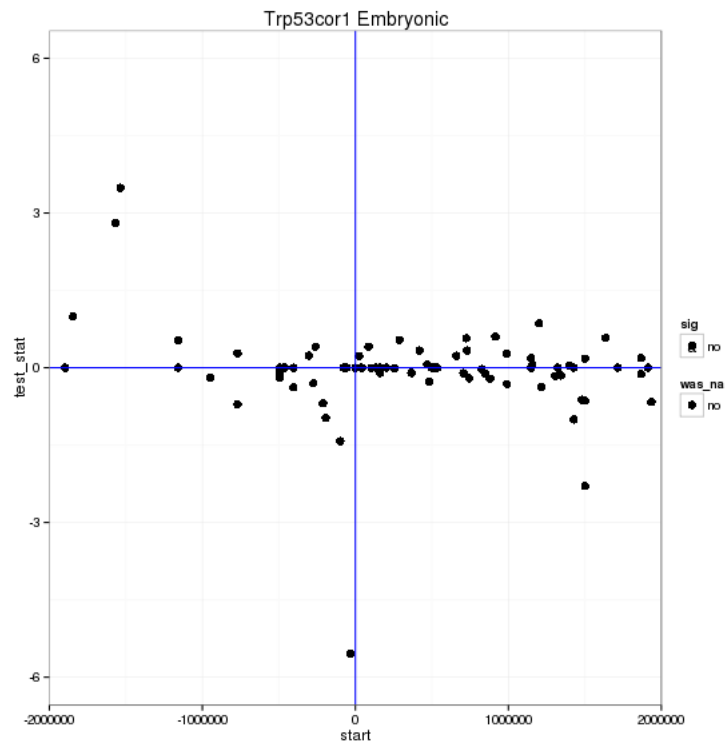

## Notes

Samples used are:

10

- 1 JR753
- 2 JR750
- 3 JR771
- 4 JR755
- 5 JR811
- 6 JR768
- 7 JR761
- 8 JR815
- 9 JR789
- 10 JR748
- 11 JR716
- 12 JR717
- 13 JR719
- 14 JR756

15 JR749

16 JR814

## Replicates

| file                                                                          | sample_name | replicate | rep_name   | total_mass  | norm_mass   | internal_scale | external_scale |
|-------------------------------------------------------------------------------|-------------|-----------|------------|-------------|-------------|----------------|----------------|
| 1 /n/rinn_data1/seq/Igoff/Projects/BrainMap/data/quants/JR753/abundances.cxb  | WT          | 0         | WT_0       | 39331900.00 | 31980100.00 | 1.28           | 1.00           |
| 2 /n/rinn_data1/seq/Igoff/Projects/BrainMap/data/quants/JR750/abundances.cxb  | WT          | 1         | WT_1       | 36031100.00 | 31980100.00 | 1.11           | 1.00           |
| 3 /n/rinn_data1/seq/Igoff/Projects/BrainMap/data/quants/JR771/abundances.cxb  | WT          | 2         | WT_2       | 38857100.00 | 31980100.00 | 1.24           | 1.00           |
| 4 /n/rinn_data1/seq/Igoff/Projects/BrainMap/data/quants/JR755/abundances.cxb  | WT          | 3         | WT_3       | 41811300.00 | 31980100.00 | 1.30           | 1.00           |
| 5 /n/rinn_data1/seq/Igoff/Projects/BrainMap/data/quants/JR811/abundances.cxb  | WT          | 4         | WT_4       | 38172800.00 | 31980100.00 | 1.21           | 1.00           |
| 6 /n/rinn_data1/seq/Igoff/Projects/BrainMap/data/quants/JR768/abundances.cxb  | WT          | 5         | WT_5       | 28375200.00 | 31980100.00 | 0.90           | 1.00           |
| 7 /n/rinn_data1/seq/Igoff/Projects/BrainMap/data/quants/JR761/abundances.cxb  | WT          | 6         | WT_6       | 31706200.00 | 31980100.00 | 0.98           | 1.00           |
| 8 /n/rinn_data1/seq/Igoff/Projects/BrainMap/data/quants/JR815/abundances.cxb  | WT          | 7         | WT_7       | 29733100.00 | 31980100.00 | 0.93           | 1.00           |
| 9 /n/rinn_data1/seq/Igoff/Projects/BrainMap/data/quants/JR789/abundances.cxb  | WT          | 8         | WT_8       | 27681500.00 | 31980100.00 | 0.87           | 1.00           |
| 10 /n/rinn_data1/seq/Igoff/Projects/BrainMap/data/quants/JR748/abundances.cxb | WT          | 9         | WT_9       | 32367000.00 | 31980100.00 | 0.97           | 1.00           |
| 11 /n/rinn_data1/seq/Igoff/Projects/BrainMap/data/quants/JR716/abundances.cxb | WT          | 10        | WT_10      | 26144700.00 | 31980100.00 | 0.82           | 1.00           |
| 12 /n/rinn_data1/seq/Igoff/Projects/BrainMap/data/quants/JR717/abundances.cxb | WT          | 11        | WT_11      | 25565400.00 | 31980100.00 | 0.81           | 1.00           |
| 13 /n/rinn_data1/seq/Igoff/Projects/BrainMap/data/quants/JR719/abundances.cxb | WT          | 12        | WT_12      | 22697800.00 | 31980100.00 | 0.69           | 1.00           |
| 14 /n/rinn_data1/seq/Igoff/Projects/BrainMap/data/quants/JR756/abundances.cxb | WT          | 13        | WT_13      | 38948900.00 | 31980100.00 | 1.23           | 1.00           |
| 15 /n/rinn_data1/seq/Igoff/Projects/BrainMap/data/quants/JR749/abundances.cxb | Trp53cor    | 0         | Trp53cor_0 | 31241000.00 | 31980100.00 | 0.95           | 1.00           |
| 16 /n/rinn_data1/seq/Igoff/Projects/BrainMap/data/quants/JR814/abundances.cxb | Trp53cor    | 1         | Trp53cor_1 | 31403400.00 | 31980100.00 | 1.00           | 1.00           |

## Session Info

```
## R version 3.0.2 (2013-09-25)
## Platform: x86_64-unknown-linux-gnu (64-bit)
##
## locale:
## [1] LC_CTYPE=en_US.UTF-8      LC_NUMERIC=C
## [3] LC_TIME=en_US.UTF-8      LC_COLLATE=en_US.UTF-8
## [5] LC_MONETARY=en_US.UTF-8  LC_MESSAGES=en_US.UTF-8
## [7] LC_PAPER=en_US.UTF-8     LC_NAME=C
## [9] LC_ADDRESS=C             LC_TELEPHONE=C
## [11] LC_MEASUREMENT=en_US.UTF-8 LC_IDENTIFICATION=C
##
## attached base packages:
## [1] grid      parallel  methods  stats    graphics grDevices utils
## [8] datasets base
##
## other attached packages:
## [1] plyr_1.8.1
## [2] stringr_0.6.2
## [3] seqbias_1.10.0
## [4] BSgenome.Mmusculus.UCSC.mm10_1.3.19
## [5] BSgenome_1.30.0
## [6] Biostrings_2.30.1
```

```

## [7] gdata_2.13.3
## [8] org.Mm.eg.db_2.10.1
## [9] clusterProfiler_1.13.1
## [10] DOSE_2.0.0
## [11] ReactomePA_1.6.1
## [12] AnnotationDbi_1.24.0
## [13] Biobase_2.22.0
## [14] mgcv_1.7-29
## [15] nlme_3.1-117
## [16] RMySQL_0.9-3
## [17] RColorBrewer_1.0-5
## [18] gridExtra_0.9.1
## [19] gtable_0.1.2
## [20] marray_1.40.0
## [21] gplots_2.13.0
## [22] GSA_1.03
## [23] limma_3.18.13
## [24] xtable_1.7-3
## [25] cummerbund_2.7.2
## [26] Gviz_1.6.0
## [27] rtracklayer_1.22.7
## [28] GenomicRanges_1.14.4
## [29] XVector_0.2.0
## [30] IRanges_1.20.7
## [31] fastcluster_1.1.13
## [32] reshape2_1.4
## [33] ggplot2_1.0.0
## [34] RSQLite_0.11.4
## [35] DBI_0.2-7
## [36] BiocGenerics_0.8.0
## [37] knitr_1.6
##
## loaded via a namespace (and not attached):
## [1] biomaRt_2.18.0      biovizBase_1.10.8   bitops_1.0-6
## [4] caTools_1.17        cluster_1.15.2      colorspace_1.2-4
## [7] dichromat_2.0-0     digest_0.6.4        DO.db_2.7
## [10] evaluate_0.5.5      formatR_0.10        Formula_1.1-1
## [13] GenomicFeatures_1.14.5 GO.db_2.10.1        GOsemSim_1.20.3
## [16] graph_1.40.1        graphite_1.8.1      gtools_3.4.1
## [19] Hmisc_3.14-4        igraph_0.7.1        KEGG.db_2.10.1
## [22] kernSmooth_2.23-12 labeling_0.2         lattice_0.20-29
## [25] latticeExtra_0.6-26 MASS_7.3-33         Matrix_1.1-3
## [28] munsell_0.4.2       org.Hs.eg.db_2.10.1 proto_0.3-10
## [31] qvalue_1.36.0       Rcpp_0.11.2         RCurl_1.95-4.1
## [34] reactome.db_1.46.1  Rsamtools_1.14.3    scales_0.2.4
## [37] splines_3.0.2       stats4_3.0.2        survival_2.37-7
## [40] tcltk_3.0.2         tools_3.0.2         XML_3.98-1.1
## [43] zlibbioc_1.8.0

```

## Run Info



```
##          param
## 1      cmd_line
## 2          version
## 3  SVN_revision
## 4  boost_version
## 5          genome
##
## 1 cuffdiff -p 10 -L WT,Trp53cor -o /n/rinn_data1/seq/lgoff/Projects/BrainMap/data/diffs/Trp53cor_vs_WT_Embryonic /n/rinn_data1/seq/lgoff/Projects/BrainM
## 2
## 3
## 4
## 5
```

# Tug1 KO vs WT (Adult)

This file shows the wt-v-ko comparison for Tug1.

Cuff overview:

```
## CuffSet instance with:  
## 2 samples  
## 26754 genes  
## 77524 isoforms  
## 0 TSS  
## 23066 CDS  
## 0 promoters  
## 0 splicing  
## 19954 relCDS
```

## QC

### Dispersion

Dispersion plot for genes in cuff: (Overdispersion can lead to innacurate quants)

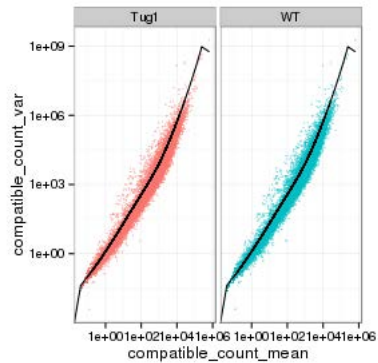

### Cross-replicate variability (fpkmSCVplot)

Differences in CV 2 can result in lower numbers of differentially expressed genes due to a higher degree of variability between replicate fpkm estimates.

Genes:

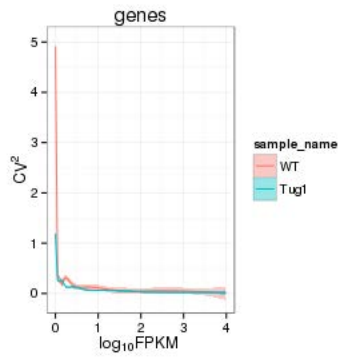

Isoforms:

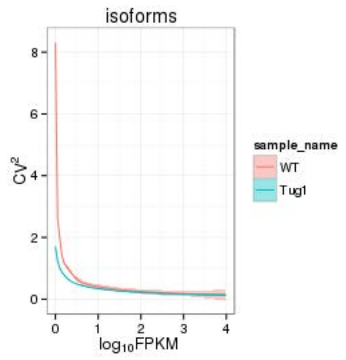

## MvA plot

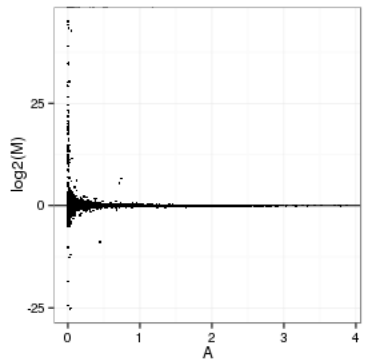

MvA plot counts

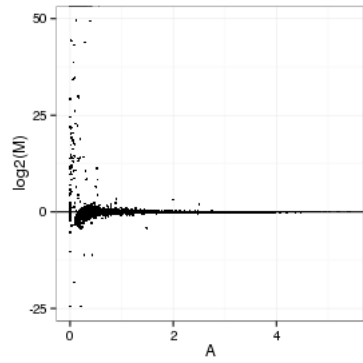

## Scatterplot matrix

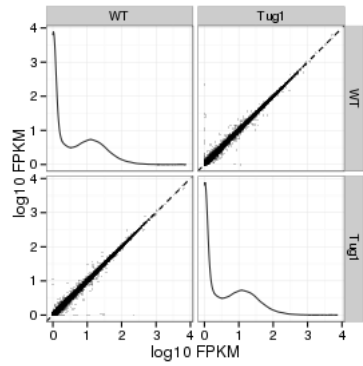

## Distributions

### Boxplots

Boxplot (genes)

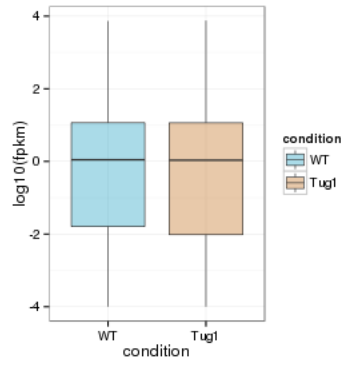

Boxplot (genes, replicates)

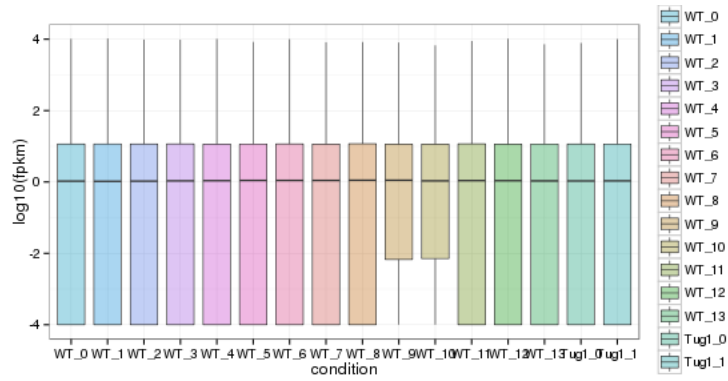

Boxplot (isoforms)

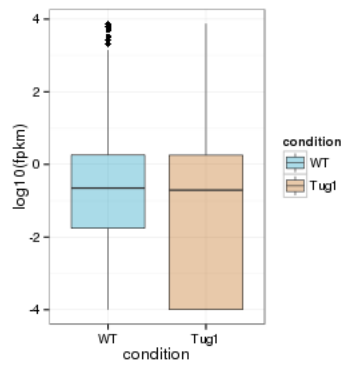

Boxplot (isoforms, replicates)

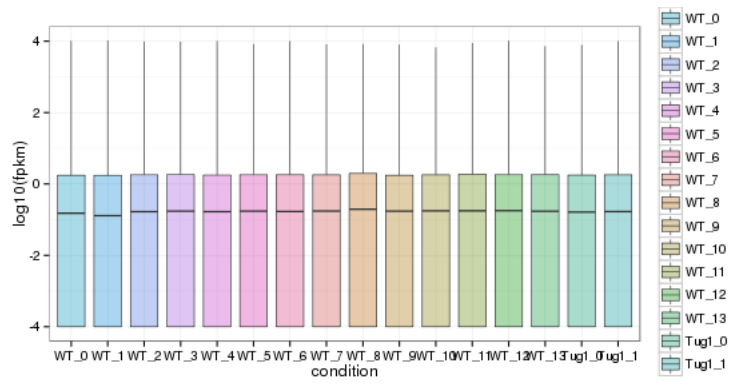

## Density

Density (genes)

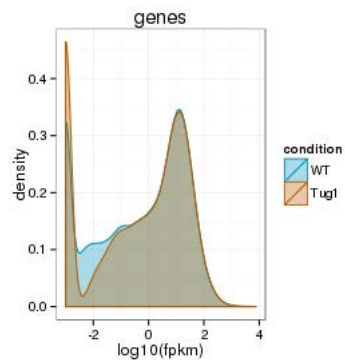

Density (genes, replicates)

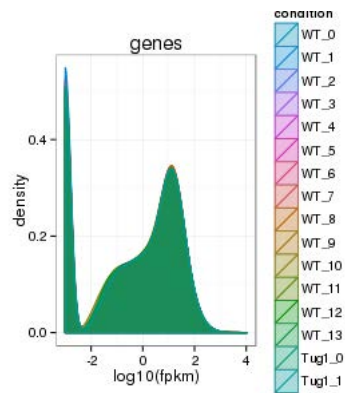

# Clustering

## Replicate Clusters

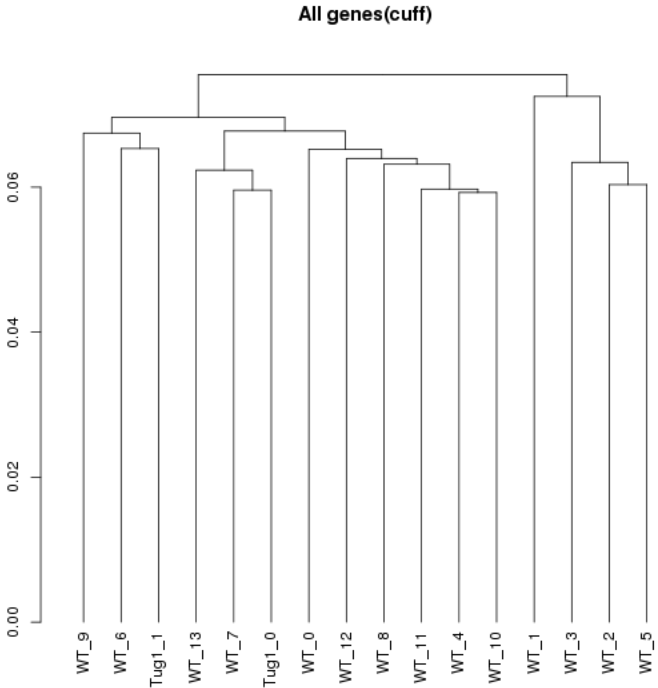

## NULL

## PCA (genes)

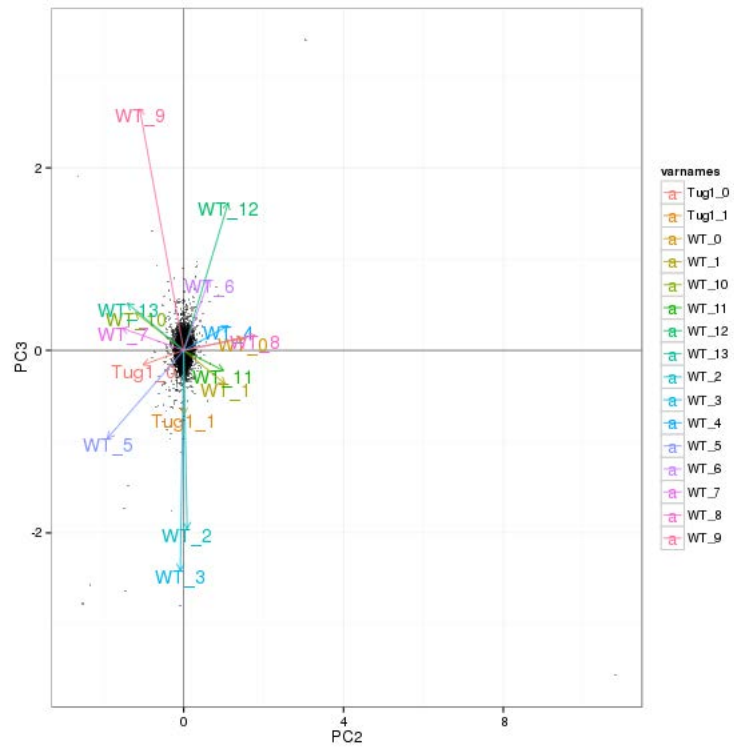

**MDS (genes)**



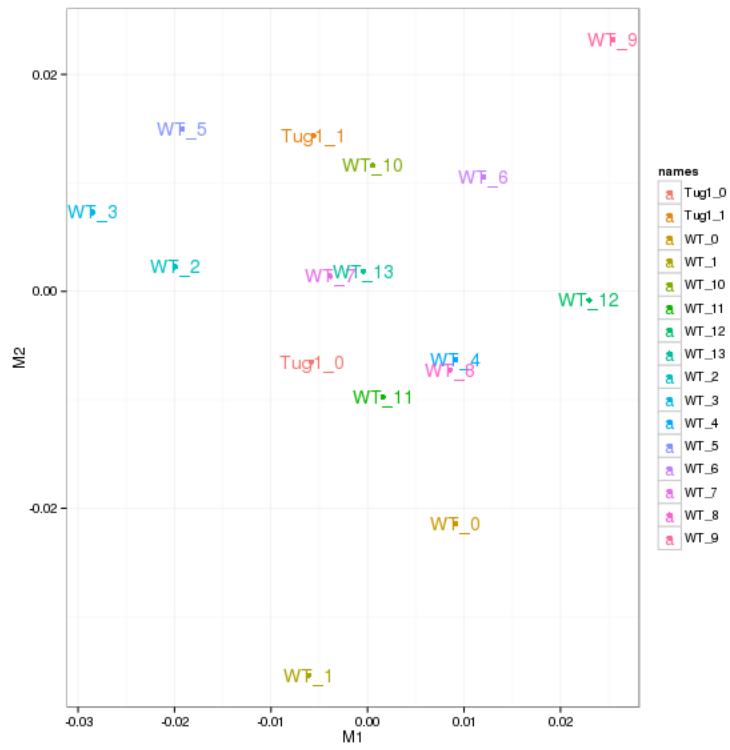

**KO assessment**  
**Endogenous IncRNA expression**

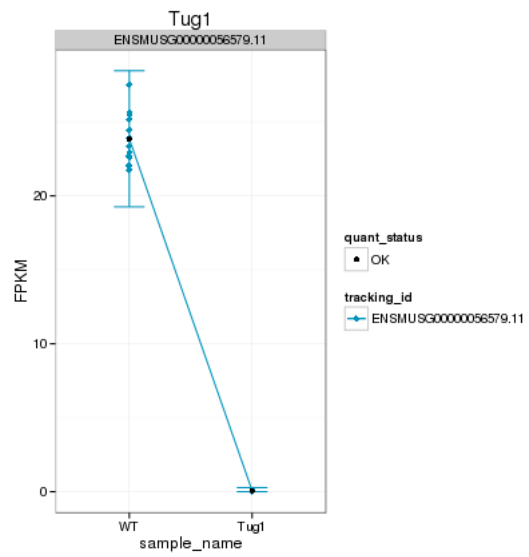

Endogenous expression of Tug1 isoforms:

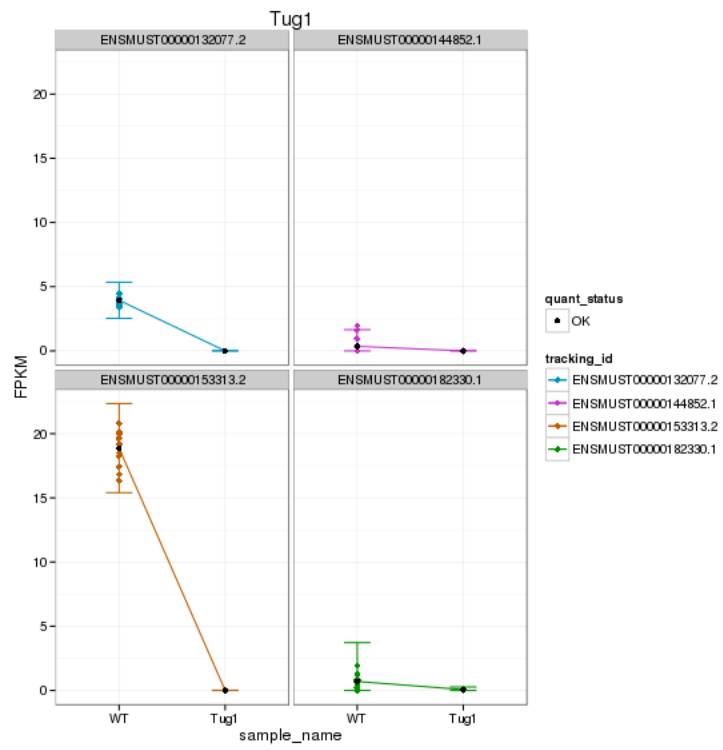

Barplot of gene expression:

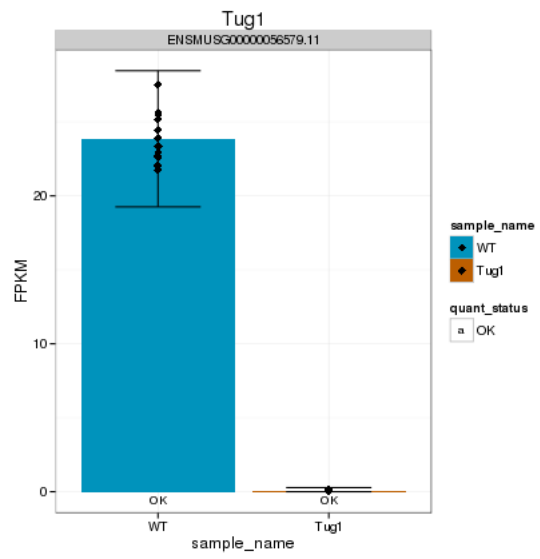

Barplot of isoform expression:

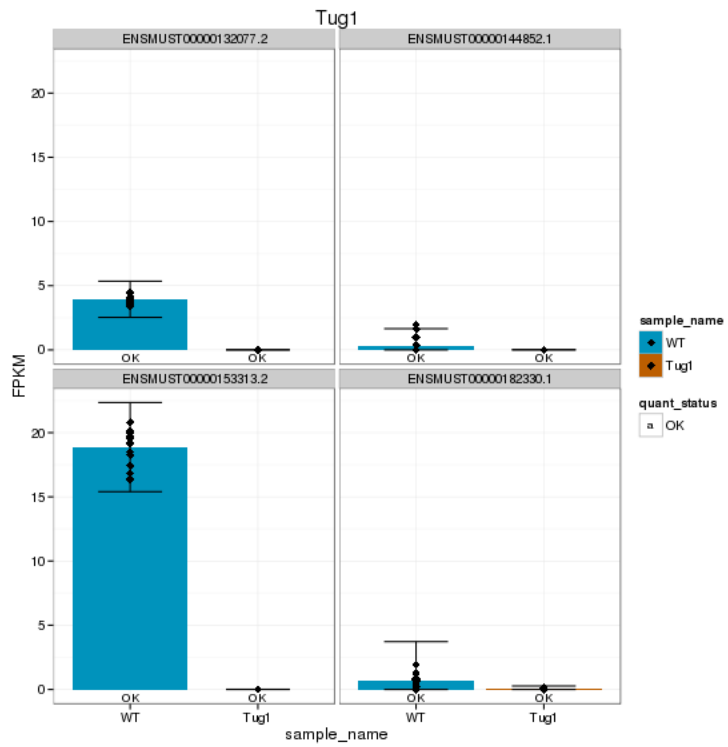

## LacZ expression

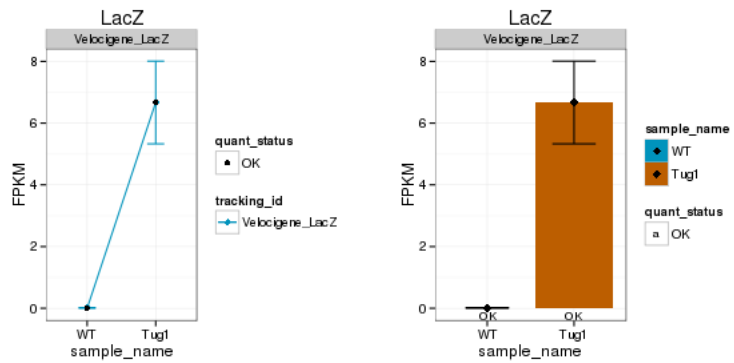

## Digital Genotyping (LacZ vs Endogenous lincRNA and Sex)

Eif2s3y is a y-expressed gene, Xist is an x-expressed gene Expression plot (endogenous linc, lacZ, Y-expressed gene):

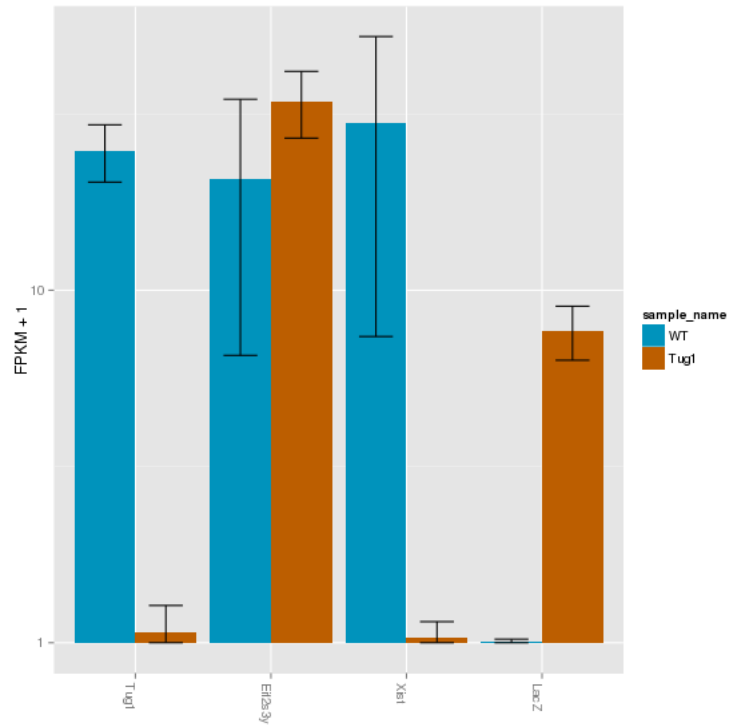

Expression heatmap:

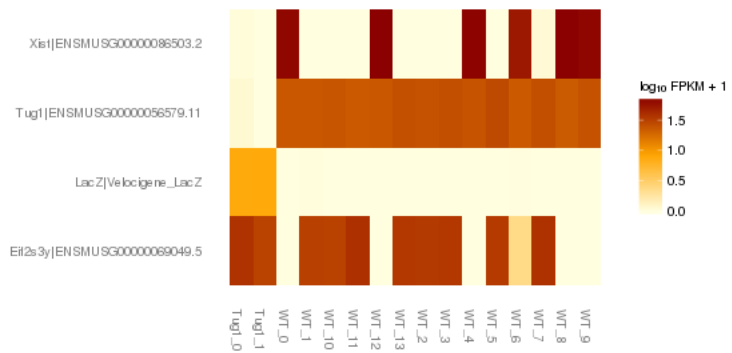

Track visualization

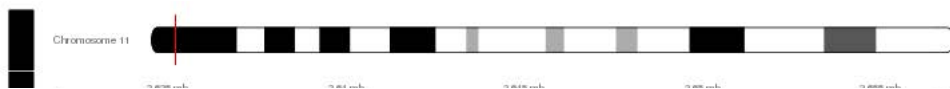

KO Region Tug\_1 Tug\_0 WT\_13 WT\_12 WT\_11 WT\_10 WT\_9 WT\_8 WT\_7 WT\_6 WT\_5 WT\_4 WT\_3 WT\_2 WT\_1 WT\_0 LncRNA isoforms

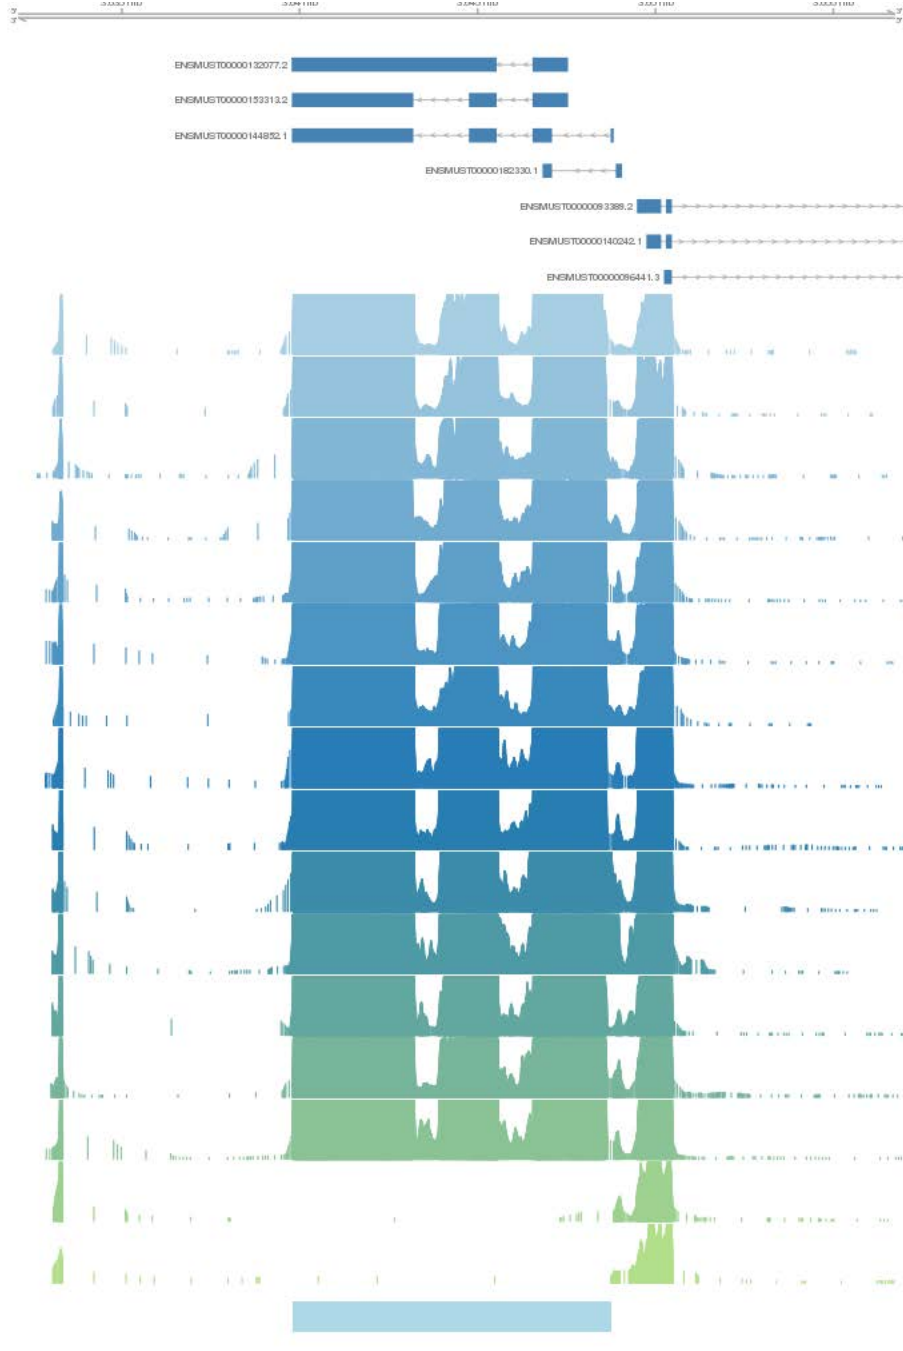

# Differential Analysis

## Differential Genes

There are 39 significantly differentially expressed genes. They are:

```
geneAnnot$gene_short_name
1 Gabra2
2 Pde1c
3 Nes
4 Plxdc1
5 Ubb
6 Pdk4
7 Mybpc1
8 Rnf185
9 Adi1
10 Serpina3n
11 Esco1
12 Rps24
13 Myoc
14 Herc6
15 Hddc3
16 Dis3l
17 Ndn
18 Arhgap27
19 Morc2a
20 Inpp5j
21 8430429K09Rik
22 Anln
23 Akap12
24 Pyurf
25 Nhirc1
26 Fat2
27 Kdm5d
28 Cox5b
29 Zbtb16
30 Ddx3y
31 Egr4
32 Gm9008
33 3222401L13Rik
34 Selm
35 Gm14418
36 Xist
37 AA465934
```



38 Gm14403

39 Gm26924

## Matrix of gene significant differences between conditions

(skip for Brainmap wt-v-ko comparisons)

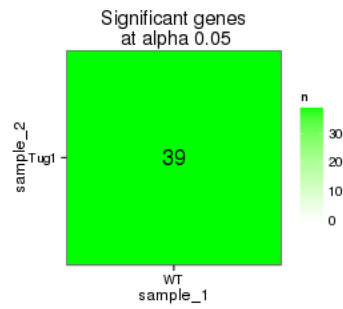

## Significant gene expression differences between conditions

Expression plot (genes):(turned off)

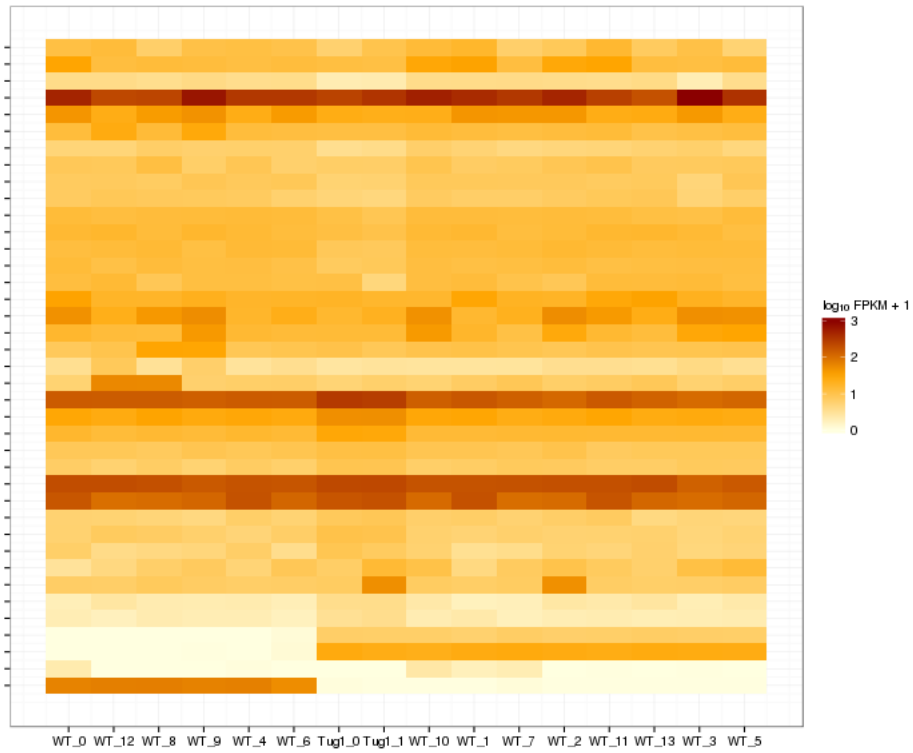

Significant genes with expression >50fpkm (any condition):(turned off)

An individual look at each of the highly expressed significantly differentially regulated genes: (eval=false for first pass)

### Expression-level/significance relationship

Scatter plot of significant genes only:

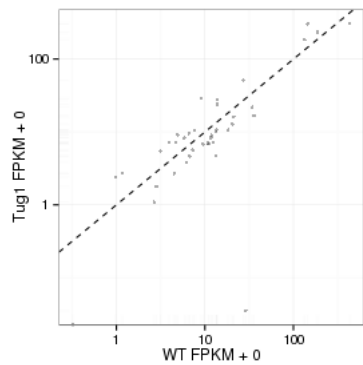

### Volcano Plot

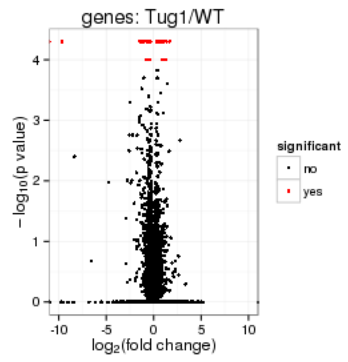

### Volcano plot with significant genes only:

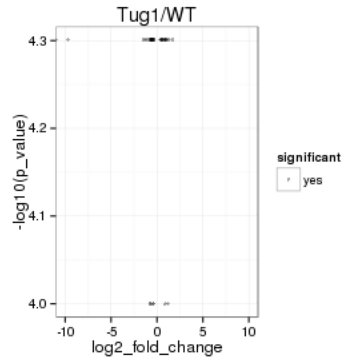

### FoldChange Heatmap

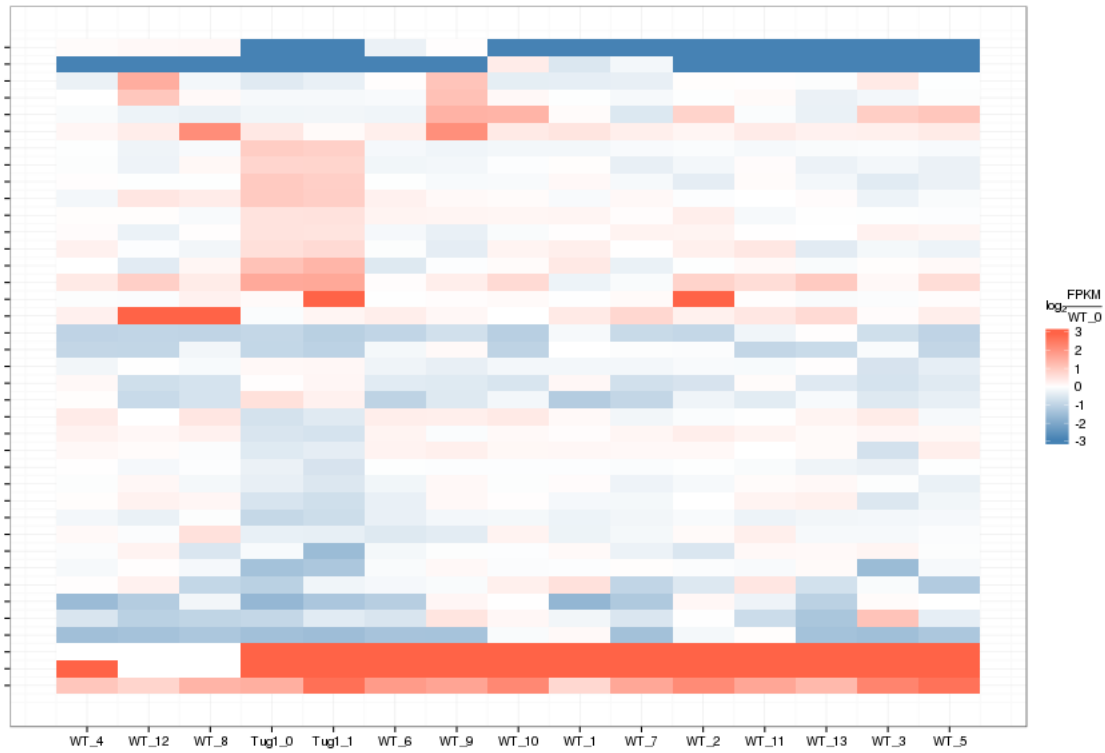

## Differential Splicing

### Differential Isoforms between conditions

Per isoform difference between conditions:



These isoforms are:

[1] "no sig isoforms"

Gene-level DE isoform heatmap

```
## [1] "no sig isoforms"
```

Isoform foldchange heatmap by isoform:

```
## [1] "no sig isoforms"
```

## Differential Splicing between conditions

(eval false for first pass)

Per condition differences in isoforms (Does gene have diff piechart between conditions?)

These genes are:

Splicing heatmap by isoform:

Splicing heatmap by gene

The following are significantly differentially spliced genes (relative portion of isoform per condition):

# Gene/Pathway Analysis

## GSEA

Enrichment and zscores are calculated based on expression in KO vs WT (fpkmKO/fpkmWT), so genes that are down regulated in KO are shown in blue, while upregulation is shown in red.

KOWT Blue = down in KO Red = Up in KO

Biocarta enrichment:

```
## [1] "Not enough significant categories to print a heatmap!"
```

Biocarta zscore:

```
## [1] "Not enough significant categories to print a heatmap!"
```

Reactome enrichment:

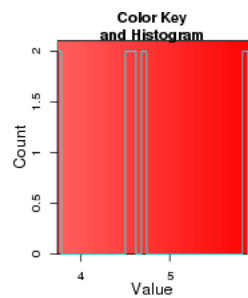

\_\_\_\_\_

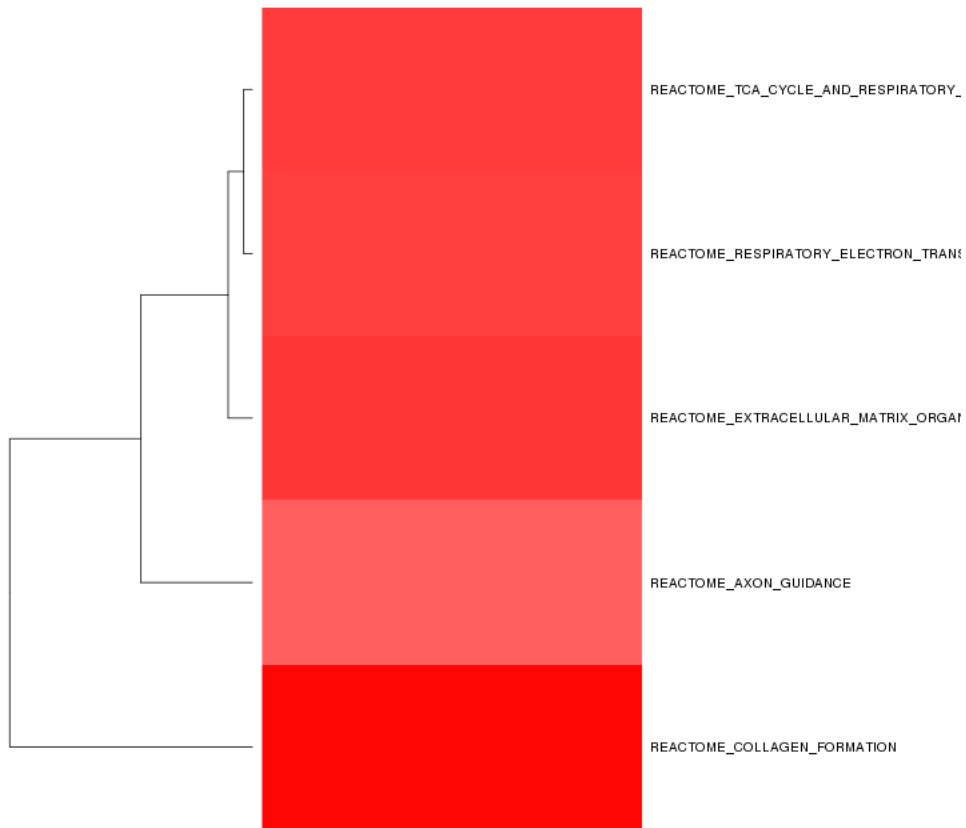

Reactome zscore:

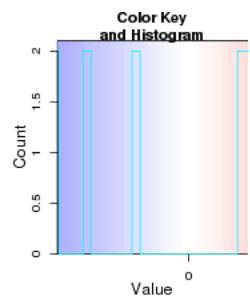

\_\_\_\_\_

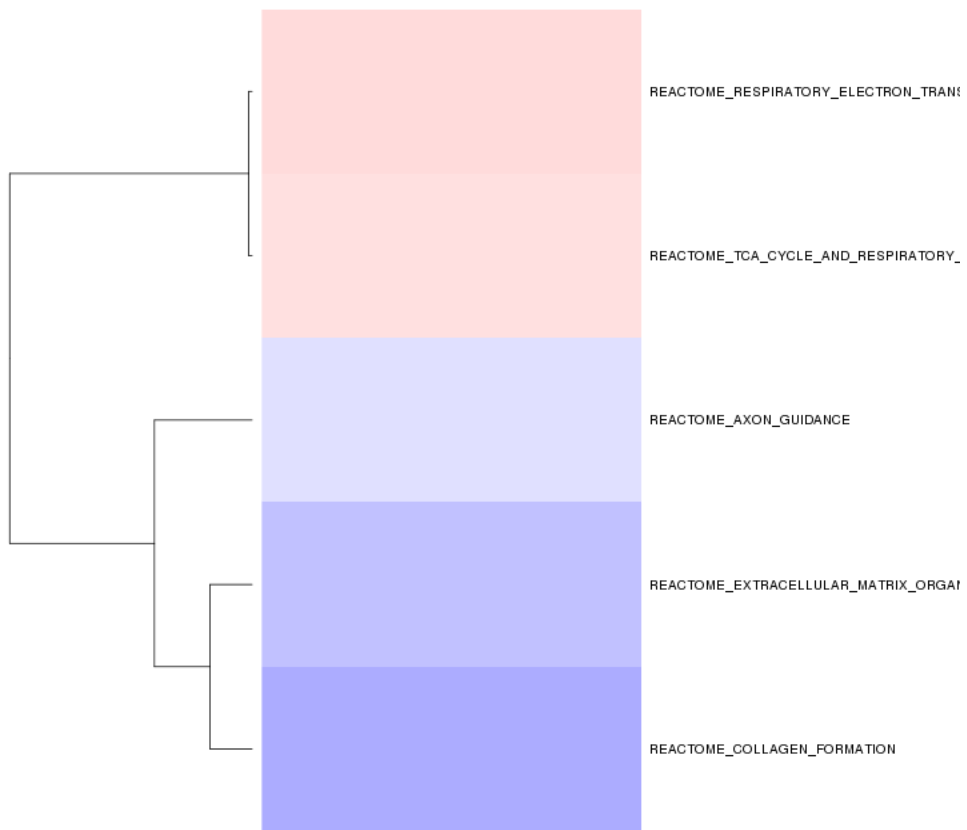

Kegg enrichment:

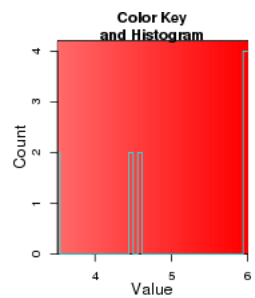

\_\_\_\_\_

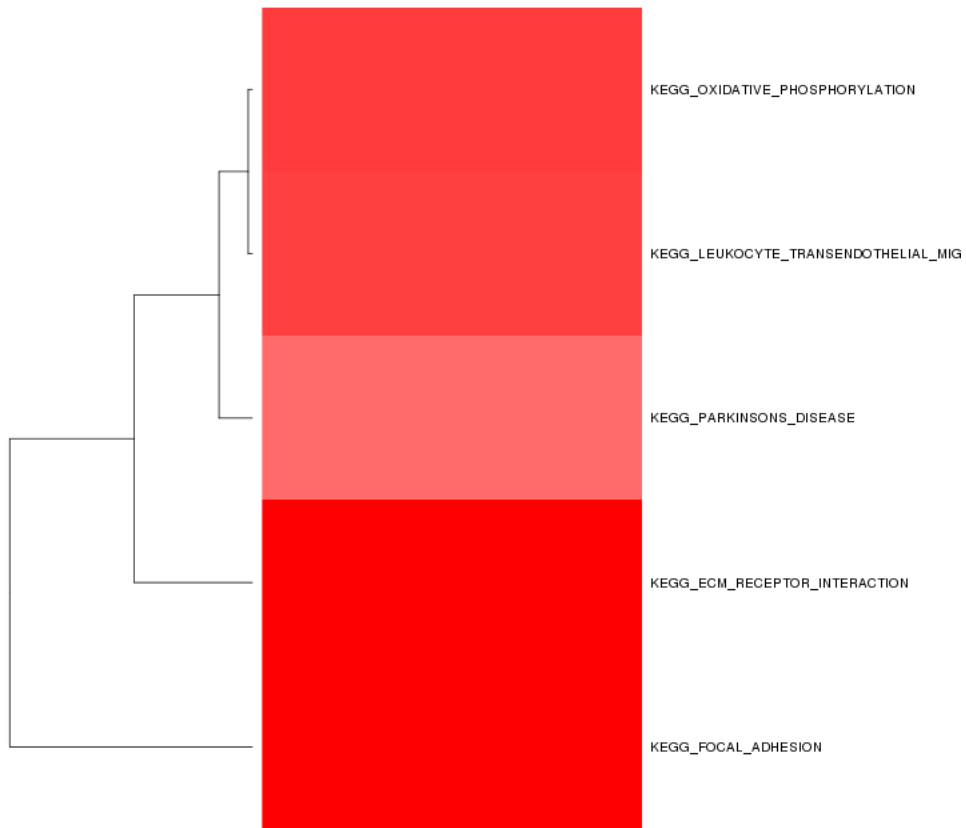

Kegg zscore:



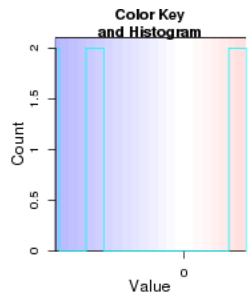

\_\_\_\_\_

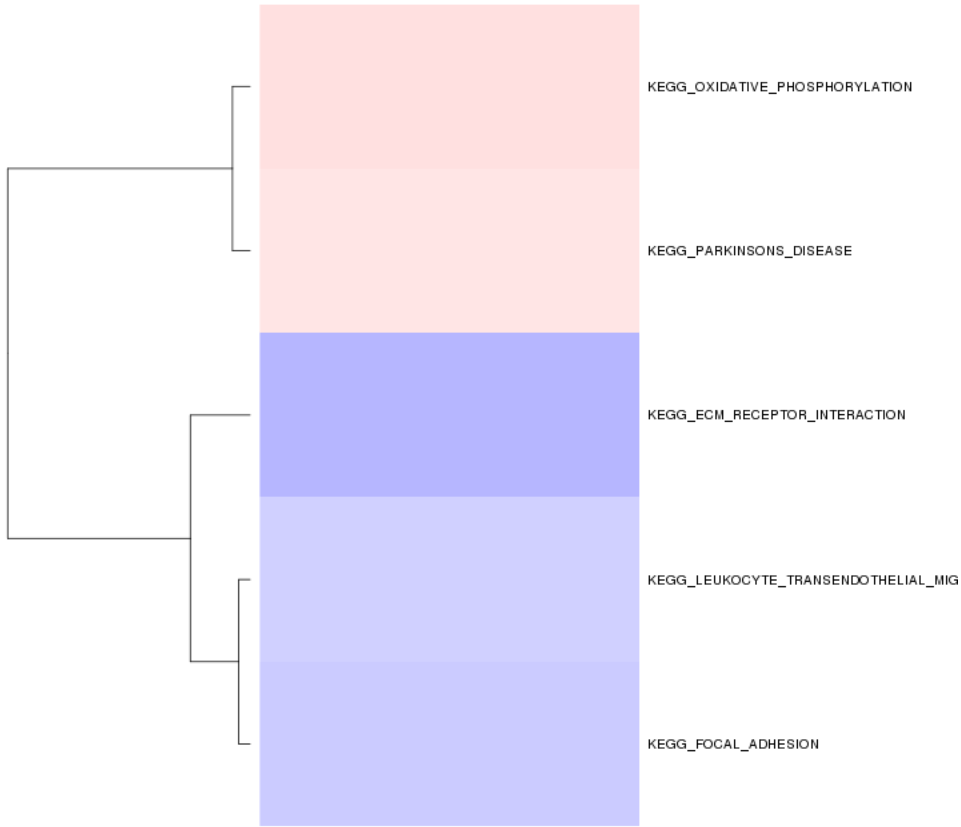

Interneuron enrichment:

## Error: no locations are finite



5HT\_genes

Lhx0\_genes

Interneuron zscore:

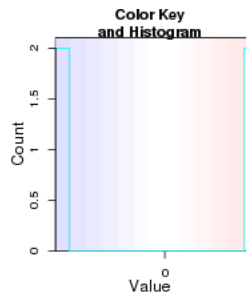

\_\_\_\_\_

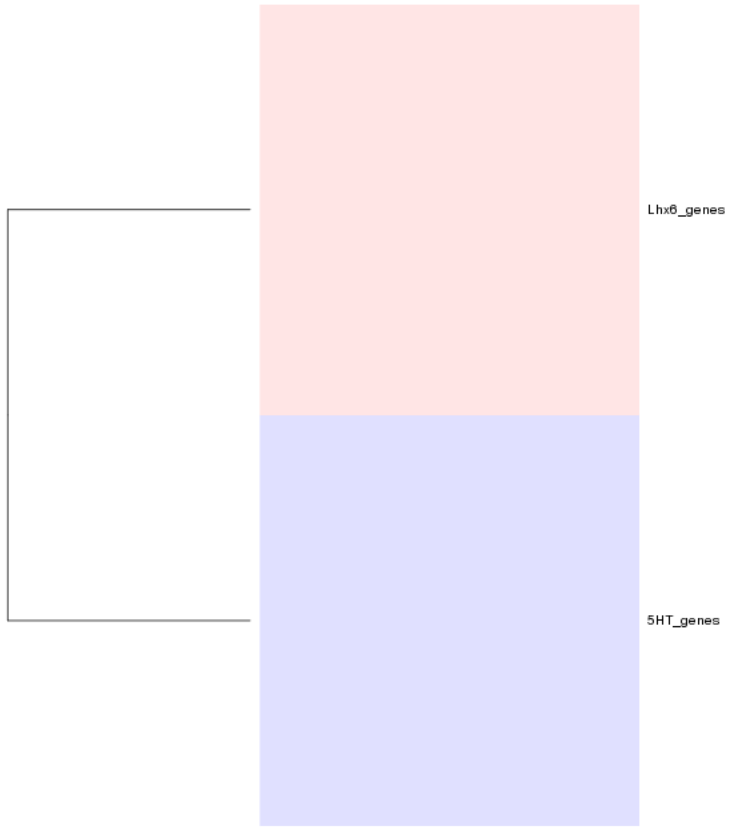

Oncogene enrichment:

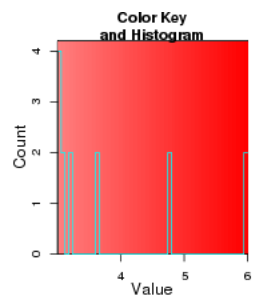

\_\_\_\_\_

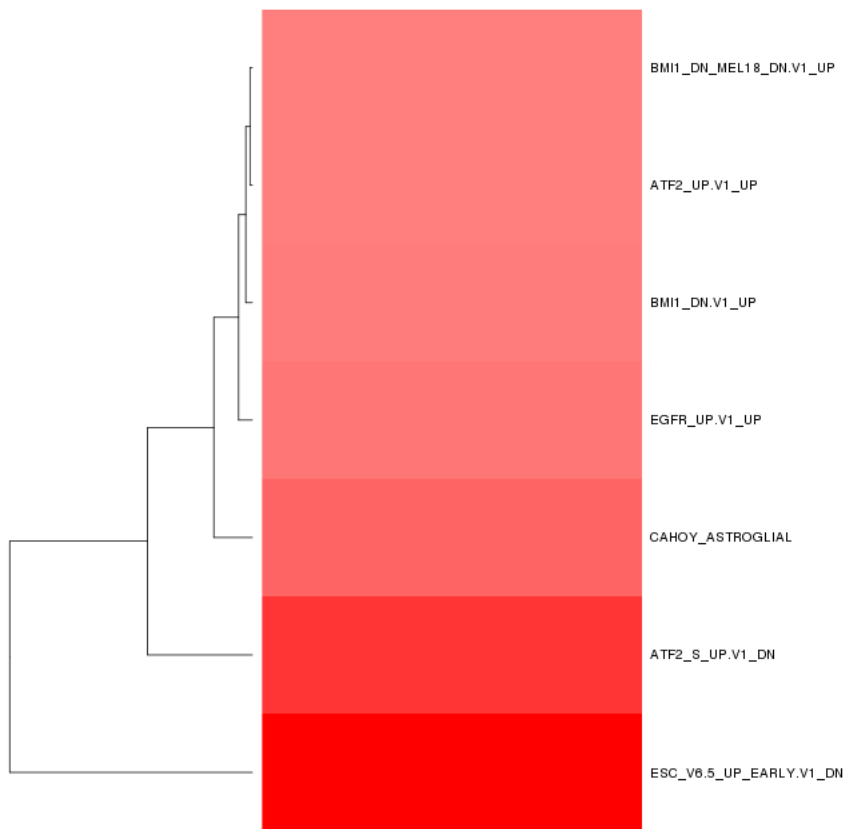

Oncogene zscore:

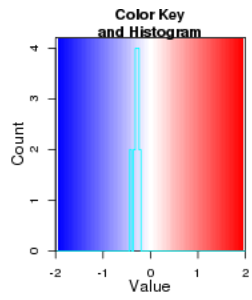

\_\_\_\_\_

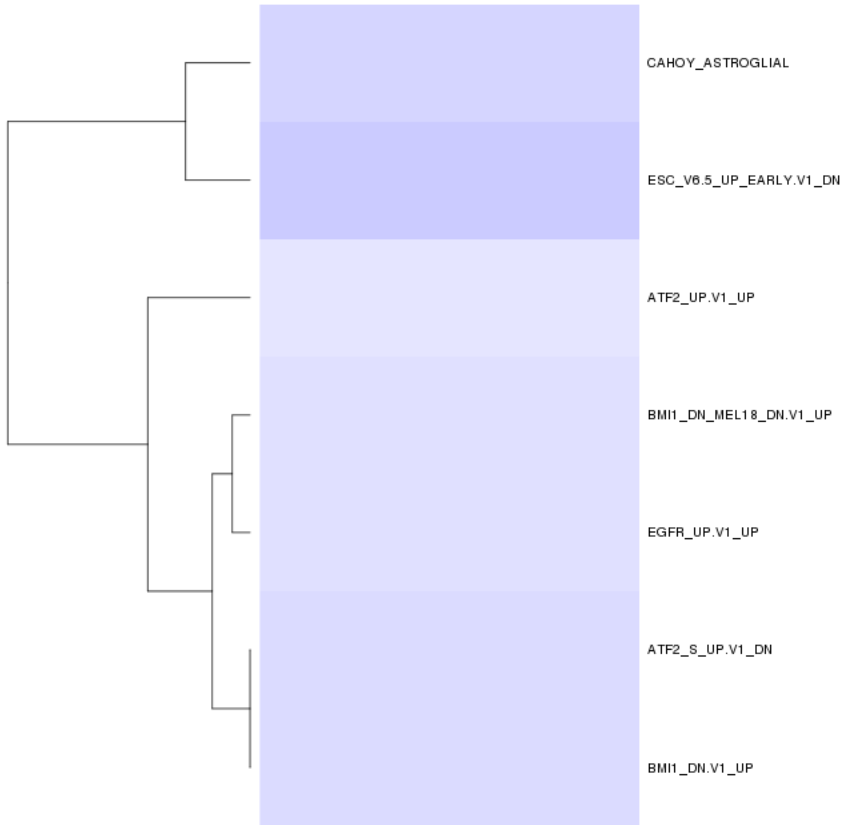

Immuno enrichment:

```
## Error: argument is of length zero
```

Immuno zscore:

```
## Error: incorrect number of dimensions
```

```
## Error: object 'x_ordered' not found
```

```
## Error: error in evaluating the argument 'x' in selecting a method for function 'as.matrix': Error: object 'x_ordered' not found
```

```
## Error: object 'x_ordered' not found
```

TF enrichment:

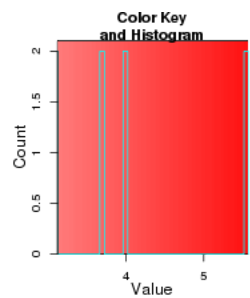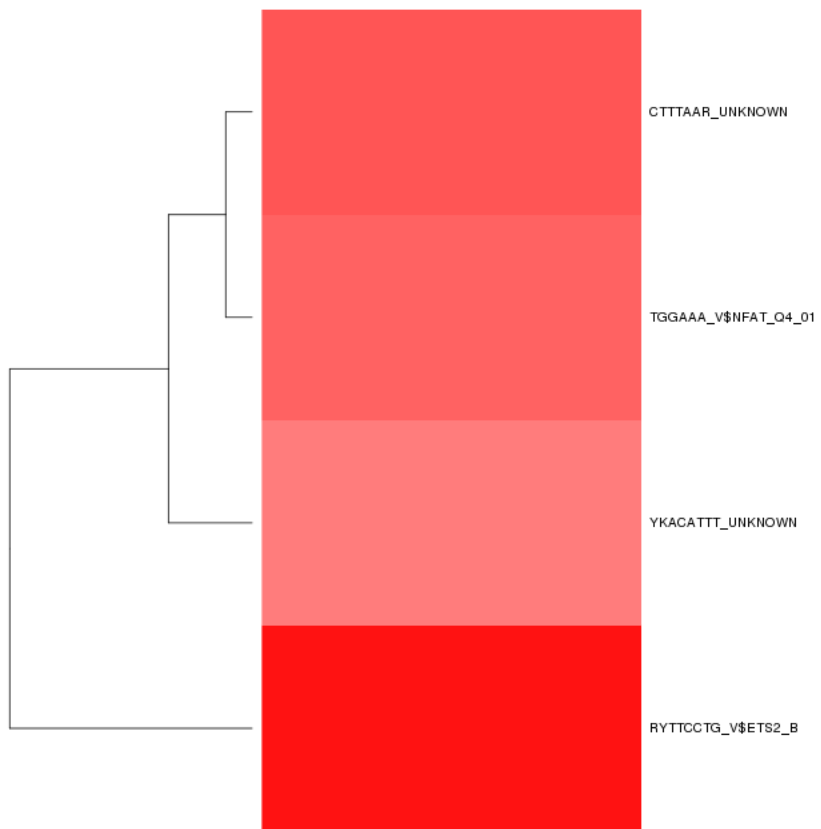

TF zscore:

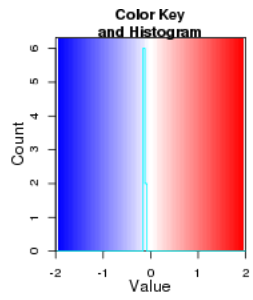

\_\_\_\_\_

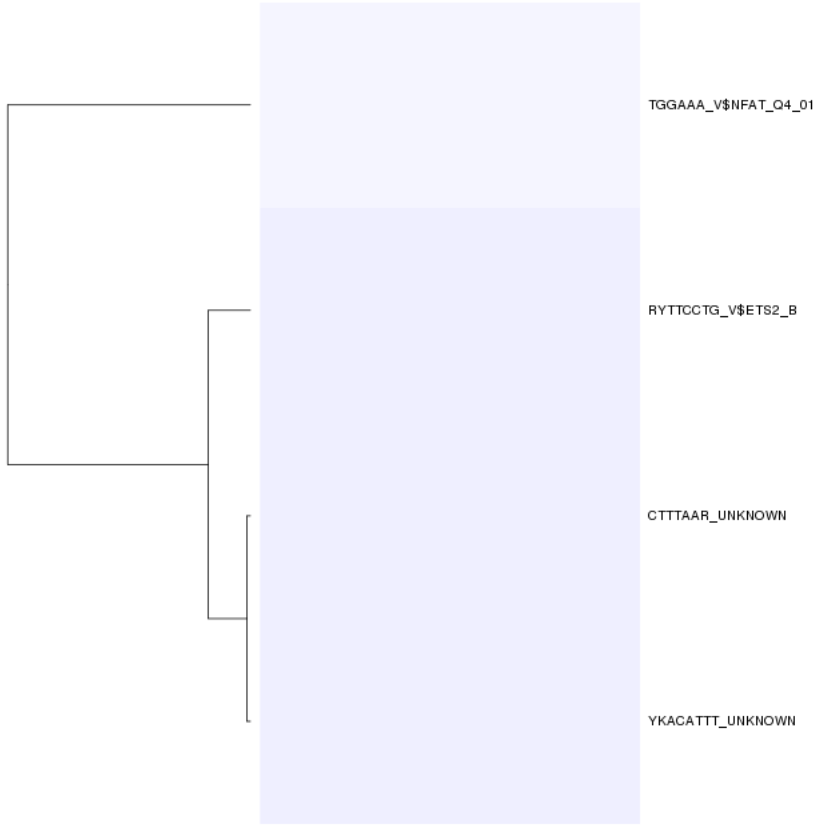

## GO enrichment

Cluster profiler used to call enrichments of significantly differentially regulated genes that map to Entrez IDs.

```
## Error: 'x' and 'units' must have length > 0
```



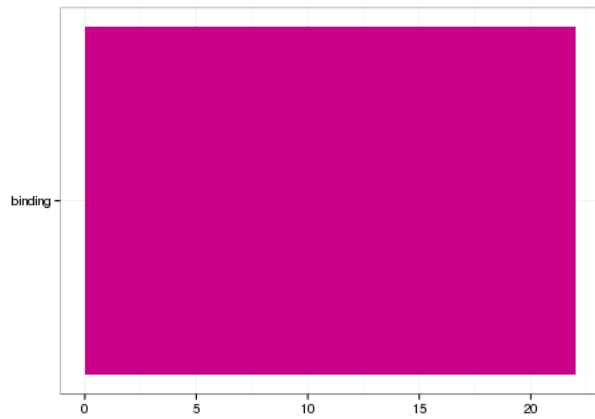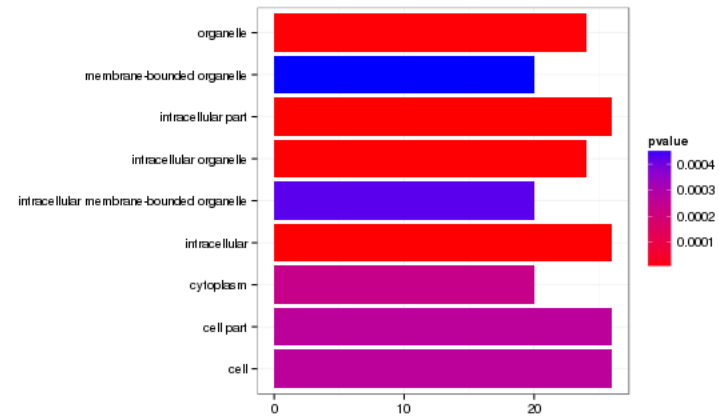

```
## Error: need finite 'xlim' values
```

```
## Error: need finite 'xlim' values
```

**Enrichment or depletion for stage-specific cell cycle markers**

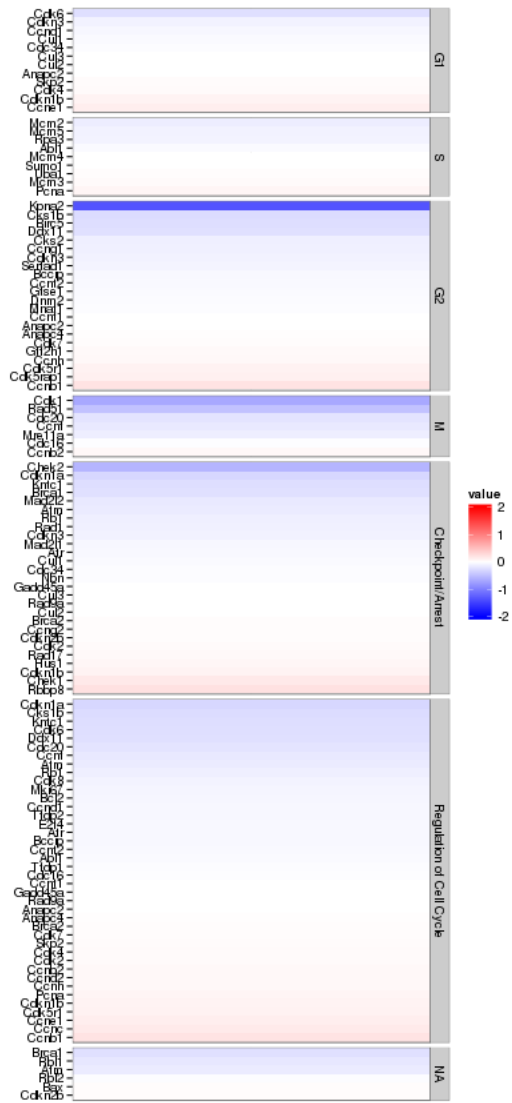

Enrichment or depletion for markers of specific cortical layers

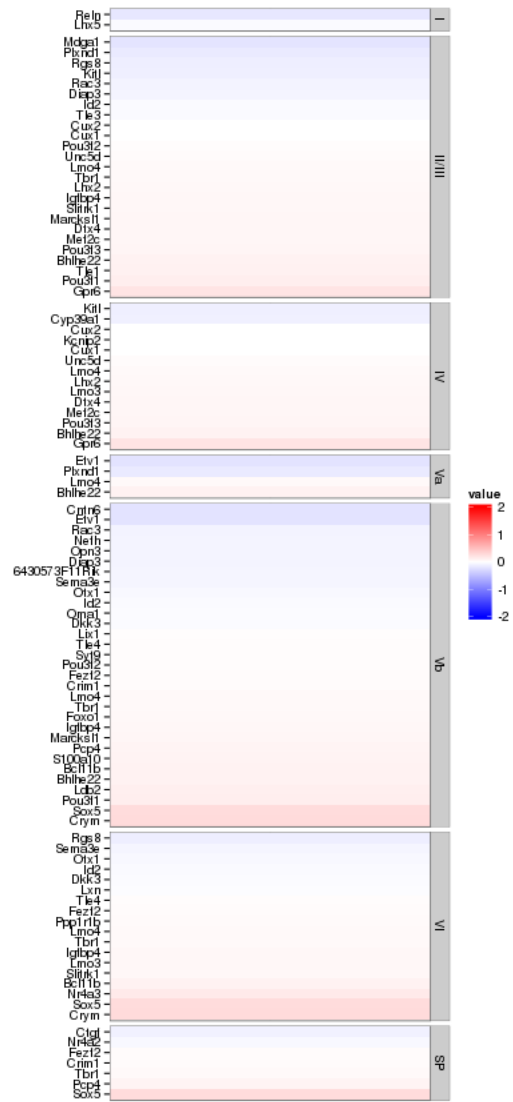

Enrichment or depletion for specific neural cell types

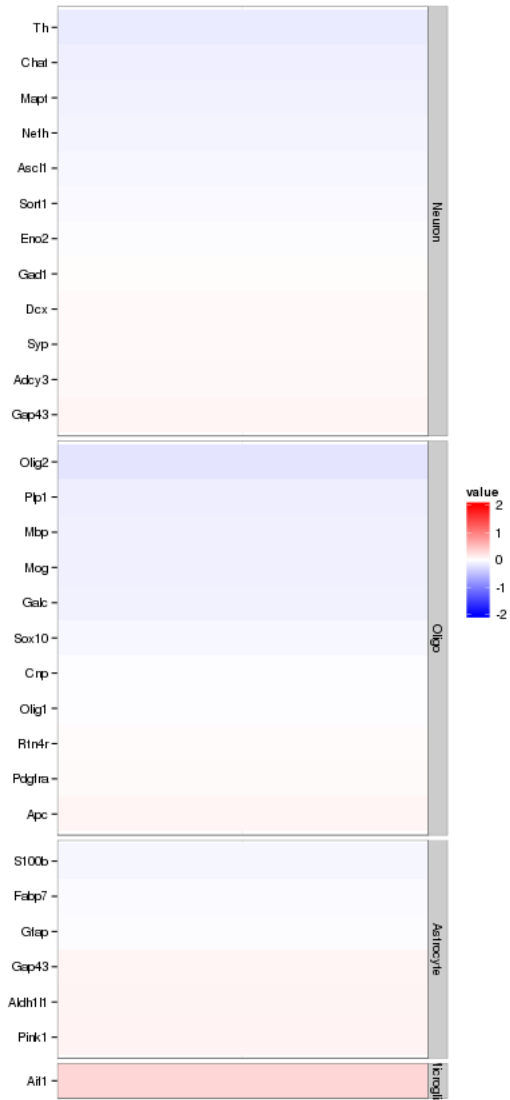

**Enrichment or Depletion of neural differentiation markers**

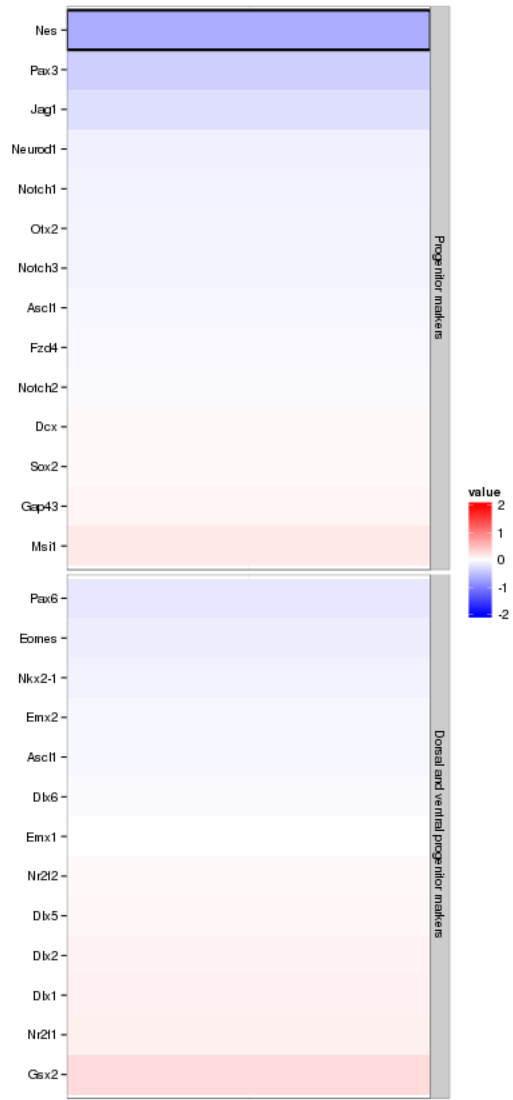

## Cis vs Trans (locally)

$\log_2$  Foldchange and test statistic are calculated with the ratio of  $\text{fpkm(KO)}/\text{fpkm(WT)}$ , thus the  $\text{test\_stat}$  is positive if a gene is higher in the KO and negative if a gene has lower expression in the KO

The pvalue for 5 genes significantly regulated in a region this size is: 0.0023

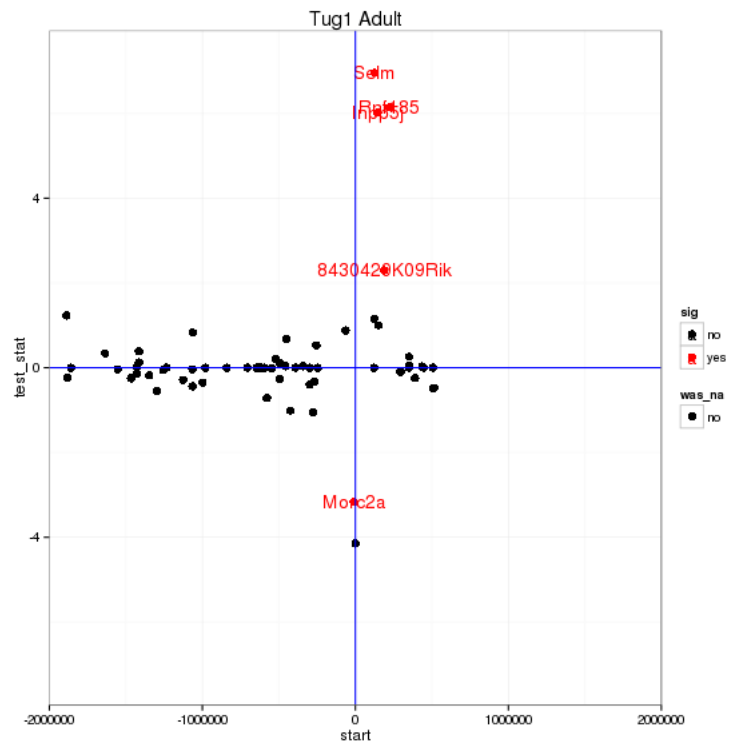

## Notes

Samples used are:

10

- 1 JR729
- 2 JR728
- 3 JR796
- 4 JR797
- 5 JR740
- 6 JR800
- 7 JR827
- 8 JR778
- 9 JR734
- 10 JR802
- 11 JR803
- 12 JR735
- 13 JR785
- 14 JR781

15 JR745

16 JR807

## Replicates

| file                                                                               | sample_name | replicate | rep_name | total_mass  | norm_mass   | internal_scale | external_scale |
|------------------------------------------------------------------------------------|-------------|-----------|----------|-------------|-------------|----------------|----------------|
| 1 /n/rinn_data1/seq/Igoff/Projects/BrainMap/data/quants/JR729/abundances.cxb WT    | 0           | WT_0      |          | 26334400.00 | 34125900.00 | 0.77           | 1.00           |
| 2 /n/rinn_data1/seq/Igoff/Projects/BrainMap/data/quants/JR728/abundances.cxb WT    | 1           | WT_1      |          | 20329200.00 | 34125900.00 | 0.59           | 1.00           |
| 3 /n/rinn_data1/seq/Igoff/Projects/BrainMap/data/quants/JR796/abundances.cxb WT    | 2           | WT_2      |          | 34089000.00 | 34125900.00 | 1.00           | 1.00           |
| 4 /n/rinn_data1/seq/Igoff/Projects/BrainMap/data/quants/JR797/abundances.cxb WT    | 3           | WT_3      |          | 28103300.00 | 34125900.00 | 0.81           | 1.00           |
| 5 /n/rinn_data1/seq/Igoff/Projects/BrainMap/data/quants/JR740/abundances.cxb WT    | 4           | WT_4      |          | 35808200.00 | 34125900.00 | 1.05           | 1.00           |
| 6 /n/rinn_data1/seq/Igoff/Projects/BrainMap/data/quants/JR800/abundances.cxb WT    | 5           | WT_5      |          | 37012200.00 | 34125900.00 | 1.09           | 1.00           |
| 7 /n/rinn_data1/seq/Igoff/Projects/BrainMap/data/quants/JR827/abundances.cxb WT    | 6           | WT_6      |          | 27786600.00 | 34125900.00 | 0.82           | 1.00           |
| 8 /n/rinn_data1/seq/Igoff/Projects/BrainMap/data/quants/JR778/abundances.cxb WT    | 7           | WT_7      |          | 39541900.00 | 34125900.00 | 1.17           | 1.00           |
| 9 /n/rinn_data1/seq/Igoff/Projects/BrainMap/data/quants/JR734/abundances.cxb WT    | 8           | WT_8      |          | 34480600.00 | 34125900.00 | 1.03           | 1.00           |
| 10 /n/rinn_data1/seq/Igoff/Projects/BrainMap/data/quants/JR802/abundances.cxb WT   | 9           | WT_9      |          | 45467400.00 | 34125900.00 | 1.32           | 1.00           |
| 11 /n/rinn_data1/seq/Igoff/Projects/BrainMap/data/quants/JR803/abundances.cxb WT   | 10          | WT_10     |          | 52130400.00 | 34125900.00 | 1.53           | 1.00           |
| 12 /n/rinn_data1/seq/Igoff/Projects/BrainMap/data/quants/JR735/abundances.cxb WT   | 11          | WT_11     |          | 34994400.00 | 34125900.00 | 1.03           | 1.00           |
| 13 /n/rinn_data1/seq/Igoff/Projects/BrainMap/data/quants/JR785/abundances.cxb WT   | 12          | WT_12     |          | 34173600.00 | 34125900.00 | 0.99           | 1.00           |
| 14 /n/rinn_data1/seq/Igoff/Projects/BrainMap/data/quants/JR781/abundances.cxb WT   | 13          | WT_13     |          | 41538900.00 | 34125900.00 | 1.23           | 1.00           |
| 15 /n/rinn_data1/seq/Igoff/Projects/BrainMap/data/quants/JR745/abundances.cxb Tug1 | 0           | Tug1_0    |          | 38091200.00 | 34125900.00 | 1.12           | 1.00           |
| 16 /n/rinn_data1/seq/Igoff/Projects/BrainMap/data/quants/JR807/abundances.cxb Tug1 | 1           | Tug1_1    |          | 29979900.00 | 34125900.00 | 0.87           | 1.00           |

## Session Info

```
## R version 3.0.2 (2013-09-25)
## Platform: x86_64-unknown-linux-gnu (64-bit)
##
## locale:
## [1] LC_CTYPE=en_US.UTF-8      LC_NUMERIC=C
## [3] LC_TIME=en_US.UTF-8      LC_COLLATE=en_US.UTF-8
## [5] LC_MONETARY=en_US.UTF-8  LC_MESSAGES=en_US.UTF-8
## [7] LC_PAPER=en_US.UTF-8     LC_NAME=C
## [9] LC_ADDRESS=C             LC_TELEPHONE=C
## [11] LC_MEASUREMENT=en_US.UTF-8 LC_IDENTIFICATION=C
##
## attached base packages:
## [1] grid      parallel  methods  stats     graphics grDevices utils
## [8] datasets base
##
## other attached packages:
## [1] plyr_1.8.1
## [2] stringr_0.6.2
## [3] seqbias_1.10.0
## [4] BSgenome.Mmusculus.UCSC.mm10_1.3.19
## [5] BSgenome_1.30.0
## [6] Biostrings_2.30.1
```

```

## [7] gdata_2.13.3
## [8] GO.db_2.10.1
## [9] org.Mm.eg.db_2.10.1
## [10] clusterProfiler_1.13.1
## [11] DOSE_2.0.0
## [12] ReactomePA_1.6.1
## [13] AnnotationDbi_1.24.0
## [14] Biobase_2.22.0
## [15] mgcv_1.7-29
## [16] nlme_3.1-117
## [17] RMySQL_0.9-3
## [18] RColorBrewer_1.0-5
## [19] gridExtra_0.9.1
## [20] gtable_0.1.2
## [21] marray_1.40.0
## [22] gplots_2.13.0
## [23] GSA_1.03
## [24] limma_3.18.13
## [25] xtable_1.7-3
## [26] cummeRbund_2.7.2
## [27] Gviz_1.6.0
## [28] rtracklayer_1.22.7
## [29] GenomicRanges_1.14.4
## [30] XVector_0.2.0
## [31] IRanges_1.20.7
## [32] fastcluster_1.1.13
## [33] reshape2_1.4
## [34] ggplot2_1.0.0
## [35] RSQLite_0.11.4
## [36] DBI_0.2-7
## [37] BiocGenerics_0.8.0
## [38] knitr_1.6
##
## loaded via a namespace (and not attached):
## [1] biomaRt_2.18.0      biovizBase_1.10.8  bitops_1.0-6
## [4] caTools_1.17        cluster_1.15.2     colorspace_1.2-4
## [7] dichromat_2.0-0     digest_0.6.4       DO.db_2.7
## [10] evaluate_0.5.5      formatR_0.10       Formula_1.1-1
## [13] GenomicFeatures_1.14.5 GOsemSim_1.20.3    graph_1.40.1
## [16] graphite_1.8.1      gtools_3.4.1       Hmisc_3.14-4
## [19] igraph_0.7.1        KEGG.db_2.10.1     KernSmooth_2.23-12
## [22] labeling_0.2        lattice_0.20-29    latticeExtra_0.6-26
## [25] MASS_7.3-33        Matrix_1.1-3       munSELL_0.4.2
## [28] org.Hs.eg.db_2.10.1 proto_0.3-10       qvalue_1.36.0
## [31] Rcpp_0.11.2         RCurl_1.95-4.1     reactome.db_1.46.1
## [34] Rsamtools_1.14.3   scales_0.2.4       splines_3.0.2
## [37] stats4_3.0.2       survival_2.37-7    tcltk_3.0.2
## [40] tools_3.0.2        XML_3.98-1.1       zlibbioc_1.8.0

```

## Run Info



```
##          param
## 1      cmd_line
## 2          version
## 3  SVN_revision
## 4  boost_version
## 5          genome
##
## 1 cuffdiff -p 10 -L WT,Tug1 -o /n/rinn_data1/seq/lgoft/Projects/BrainMap/data/diffs/Tug1_vs_WT_Adult /n/rinn_data1/seq/lgoft/Projects/BrainMap/data/ann
## 2
## 3
## 4
## 5
```

# Tug1 KO vs WT (Embryonic)

This file shows the wt-v-ko comparison for Tug1.

Cuff overview:

```
## CuffSet instance with:  
## 2 samples  
## 26754 genes  
## 77524 isoforms  
## 0 TSS  
## 23066 CDS  
## 0 promoters  
## 0 splicing  
## 19954 relCDS
```

## QC

### Dispersion

Dispersion plot for genes in cuff: (Overdispersion can lead to innacurate quants)

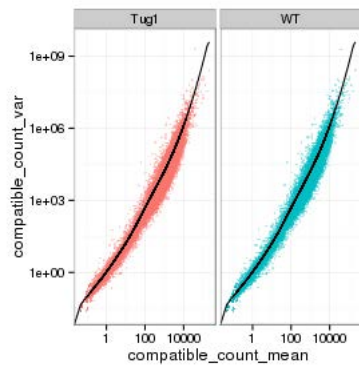

### Cross-replicate variability (fpkmSCVplot)

Differences in CV 2 can result in lower numbers of differentially expressed genes due to a higher degree of variability between replicate fpkm estimates.

Genes:

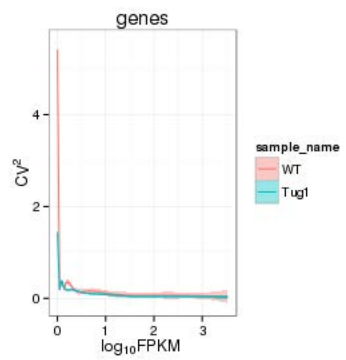

Isoforms:

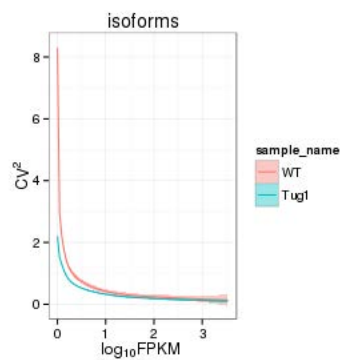

## MvA plot

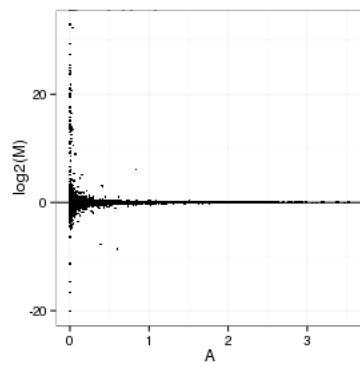

## MvA plot counts

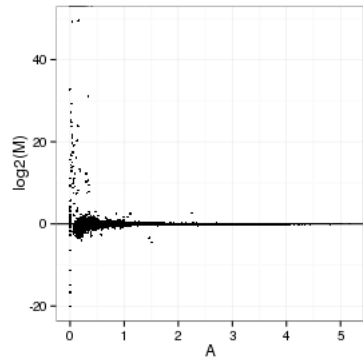

## Scatterplot matrix

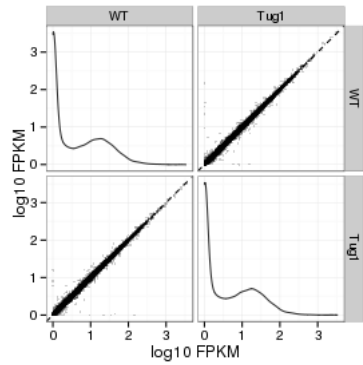

## Distributions

### Boxplots

Boxplot (genes)

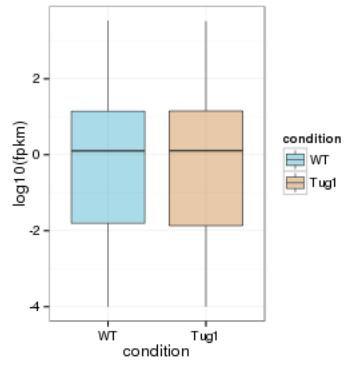

Boxplot (genes, replicates)

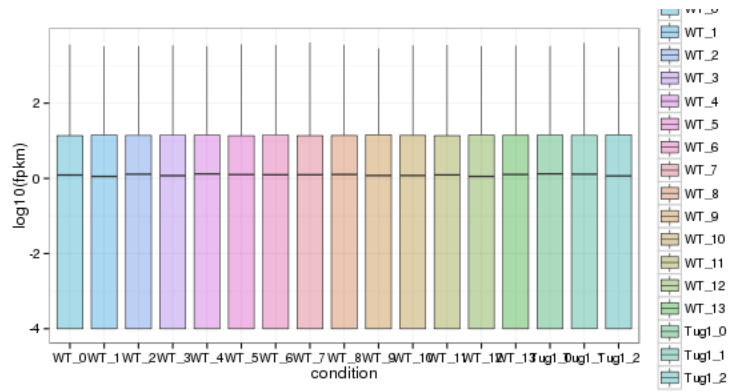

Boxplot (isoforms)

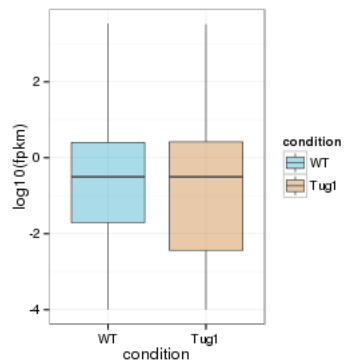

Boxplot (isoforms, replicates)

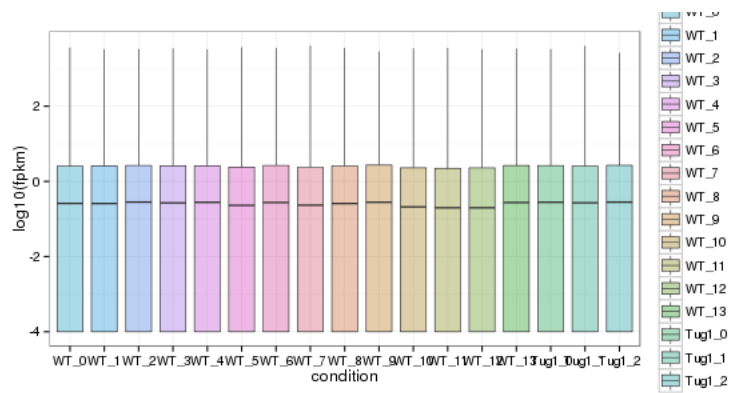

## Density

Density (genes)

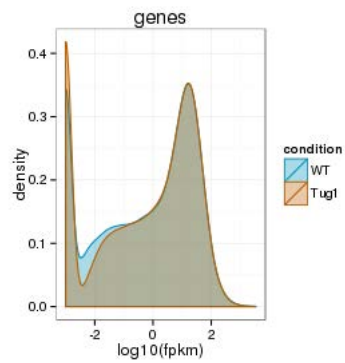

Density (genes, replicates)

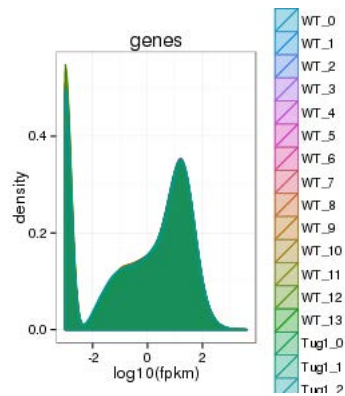

# Clustering

## Replicate Clusters

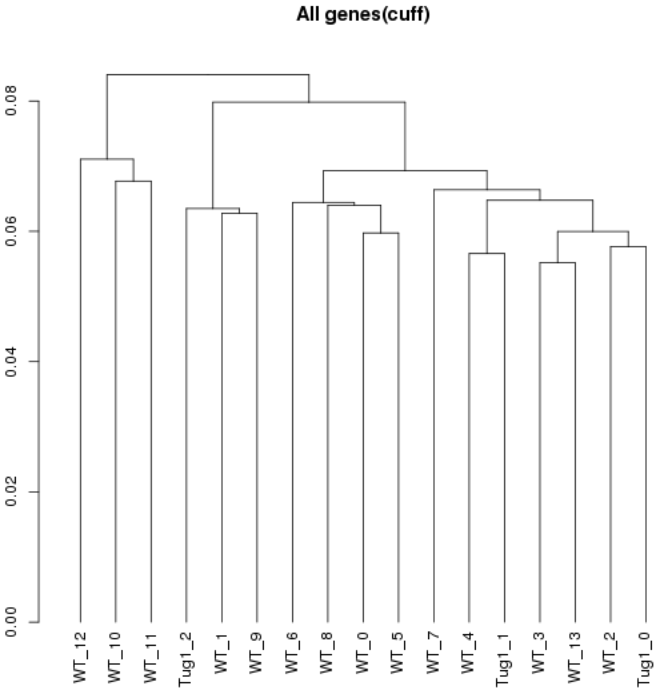

## NULL

## PCA (genes)

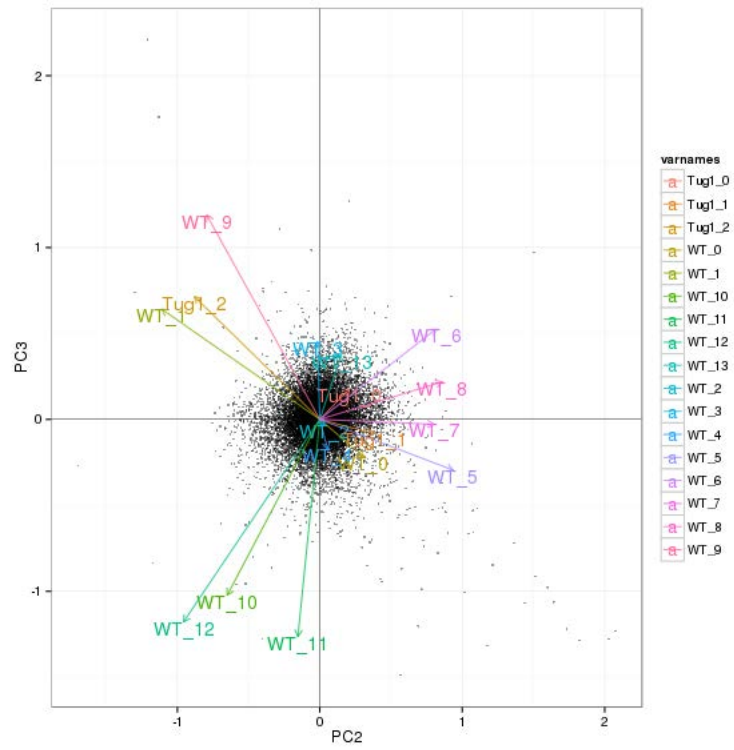

**MDS (genes)**



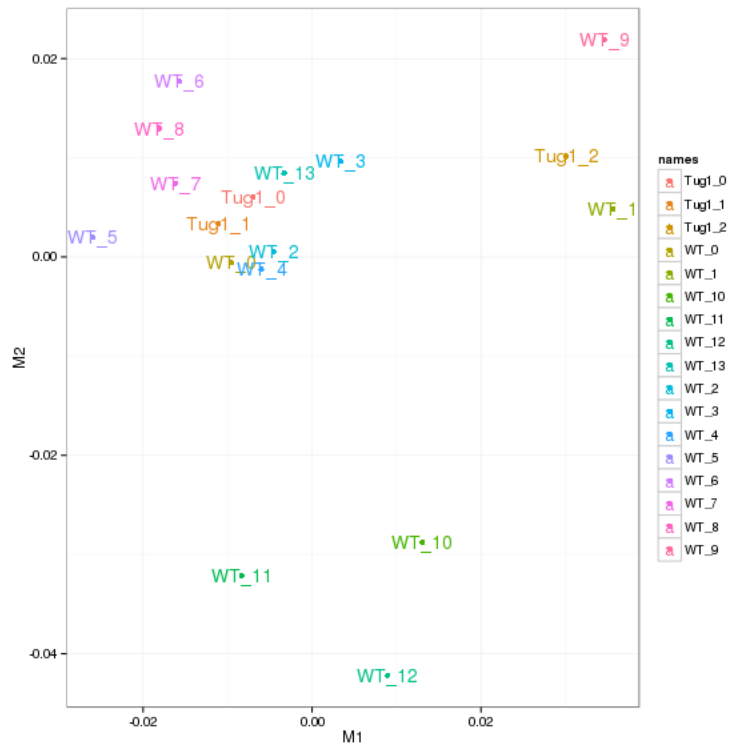

**KO assessment**  
**Endogenous IncRNA expression**

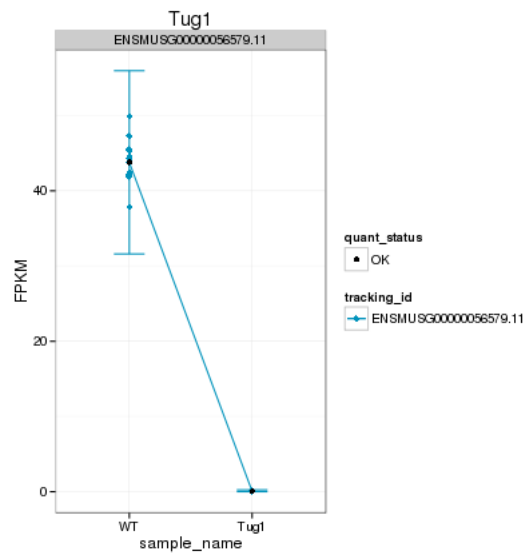

Endogenous expression of Tug1 isoforms:

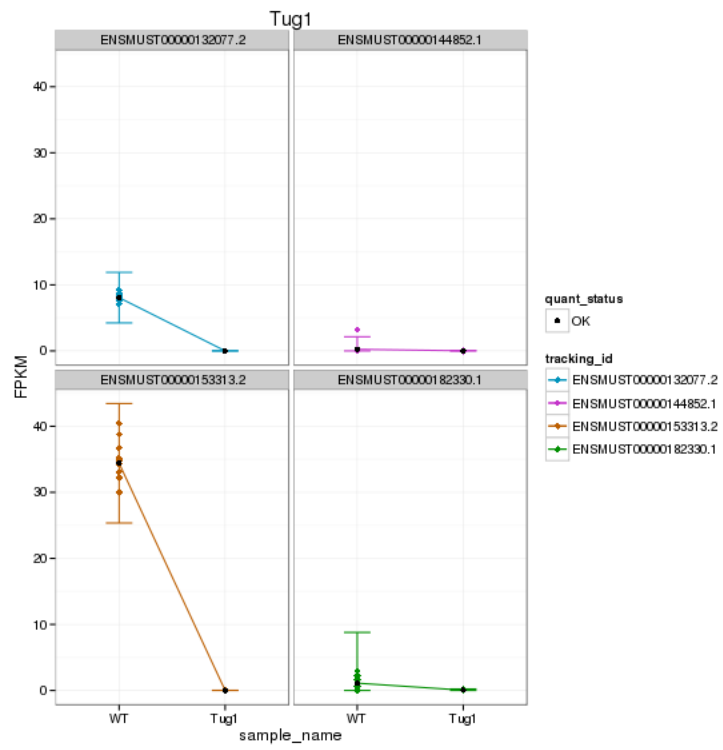

Barplot of gene expression:

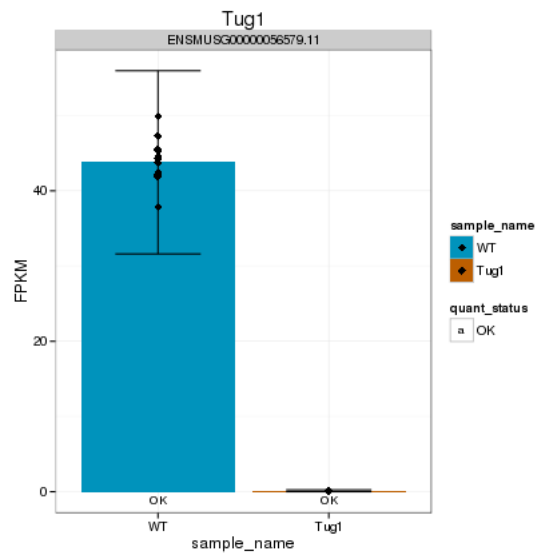

Barplot of isoform expression:

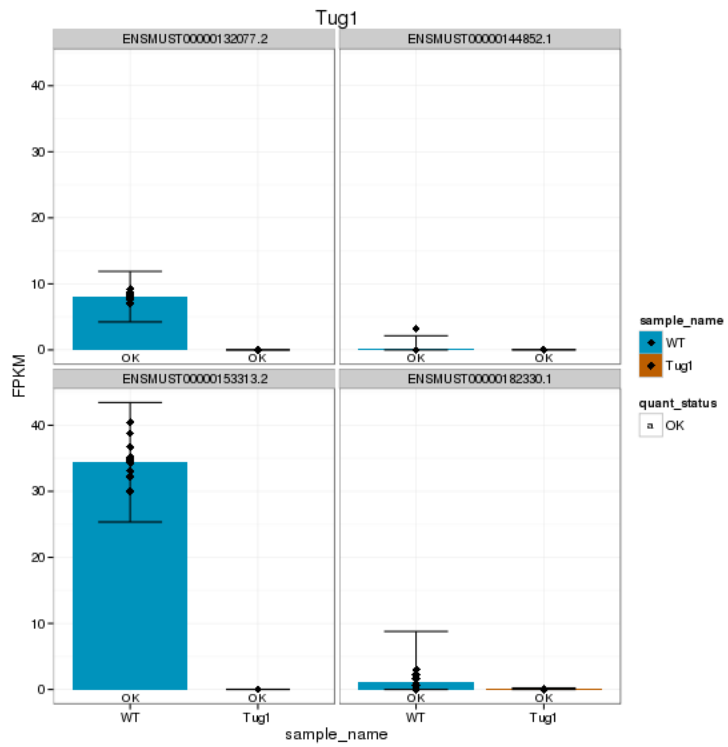

## LacZ expression

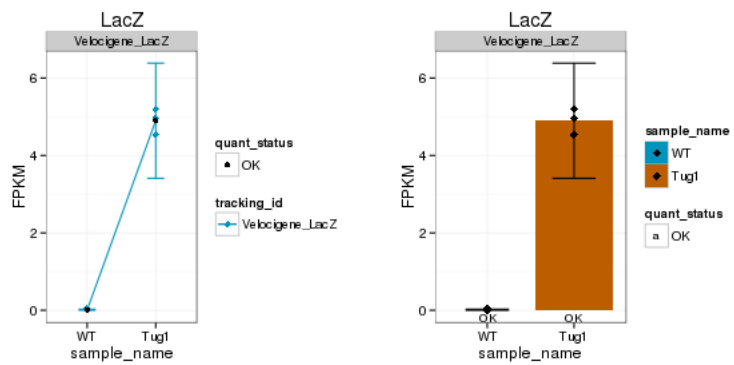

## Digital Genotyping (LacZ vs Endogenous lincRNA and Sex)

Eif2s3y is a y-expressed gene, Xist is an x-expressed gene Expression plot (endogenous linc, lacZ, Y-expressed gene):

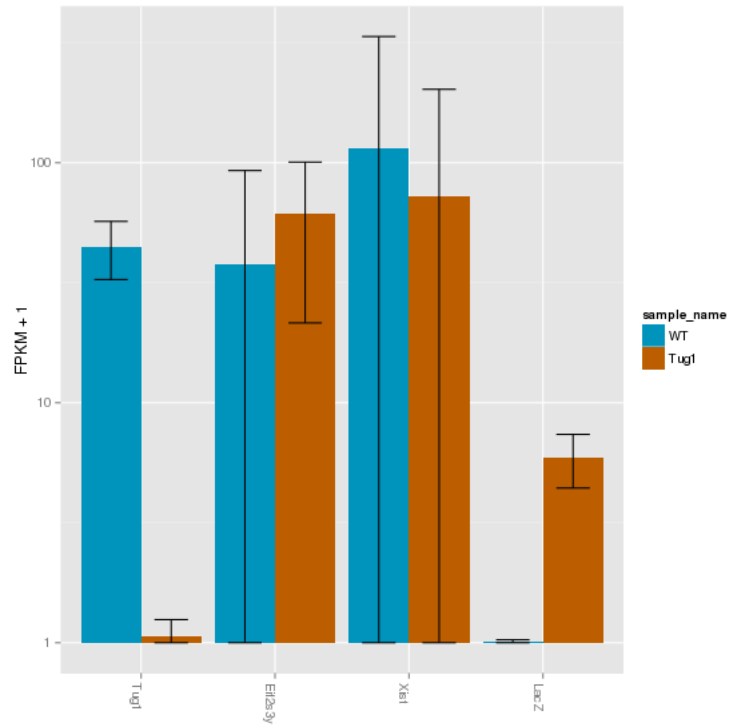

Expression heatmap:

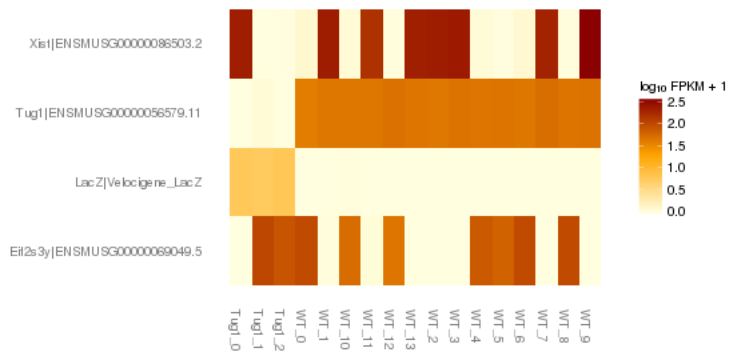

Track visualization

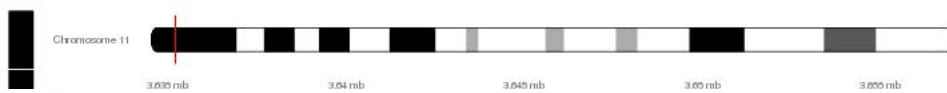

KO Region WT\_0 WT\_1 WT\_2 WT\_3 WT\_4 WT\_5 WT\_6 WT\_7 WT\_8 WT\_9 WT\_10 WT\_11 WT\_12 WT\_13 Tug\_0 Tug\_1 Tug\_2 LncRNA isoforms

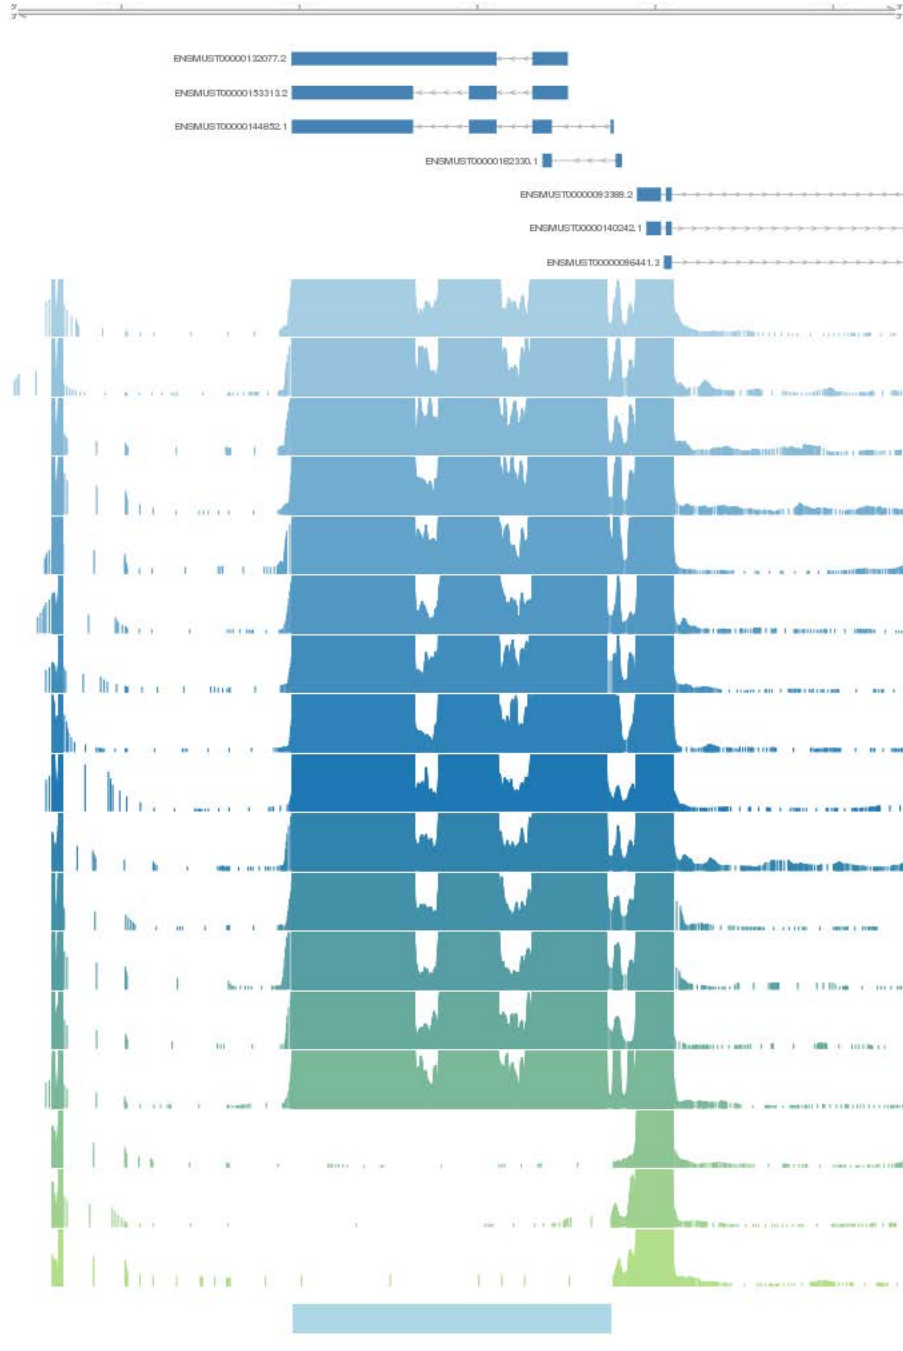

# Differential Analysis

## Differential Genes

There are 20 significantly differentially expressed genes. They are:

**geneAnnot\$gene\_short\_name**

- 1 Rec8
- 2 Rnf185
- 3 Rps14
- 4 Morc2a
- 5 Inpp5j
- 6 8430429K09Rik
- 7 Fmod
- 8 Map10
- 9 Hbb-bs
- 10 Tug1
- 11 Kdm5d
- 12 Cox5b
- 13 Rps4y2
- 14 Eno1
- 15 Lyz2
- 16 Slfn9
- 17 3222401L13Rik
- 18 Hbb-bt
- 19 Selm
- 20 Gm26809

### Matrix of gene significant differences between conditions

(skip for Brainmap wt-v-ko comparisons)

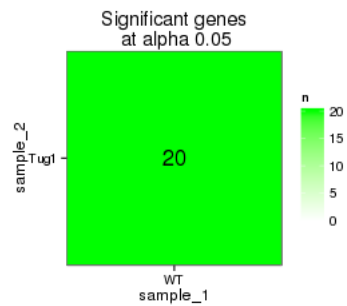



## Significant gene expression differences between conditions

Expression plot (genes):(turned off)

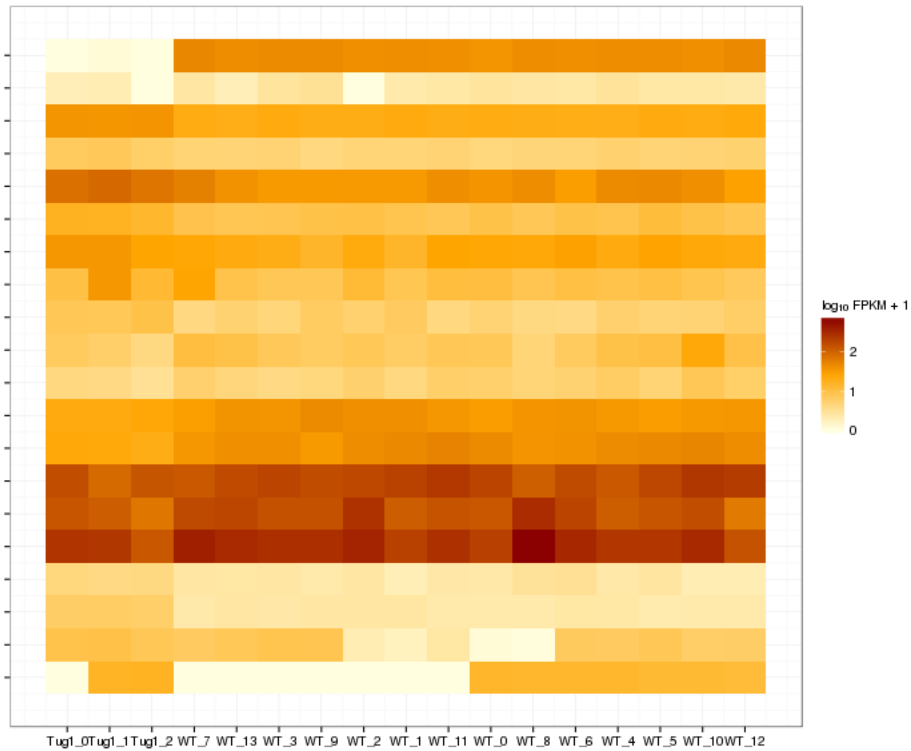

Significant genes with expression >50fpm (any condition):(turned off)

An individual look at each of the highly expressed significantly differentially regulated genes: (eval=false for first pass)

## Expression-level/significance relationship

Scatter plot of significant genes only:

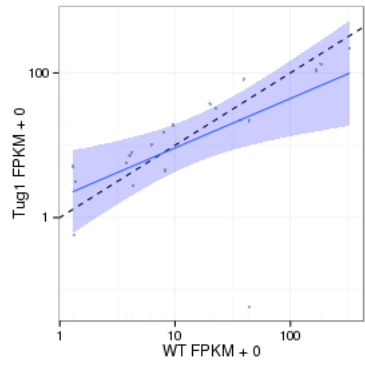

Volcano Plot

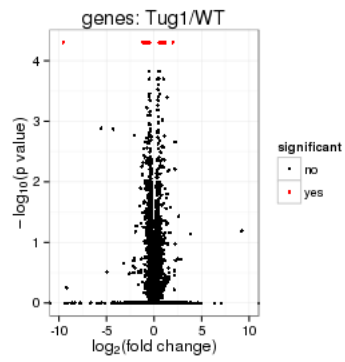

Volcano plot with significant genes only:

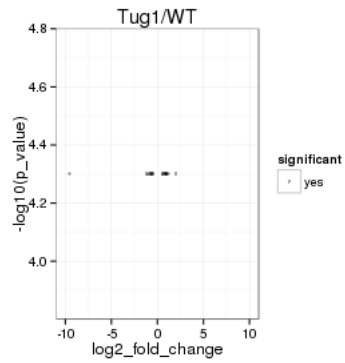

FoldChange Heatmap

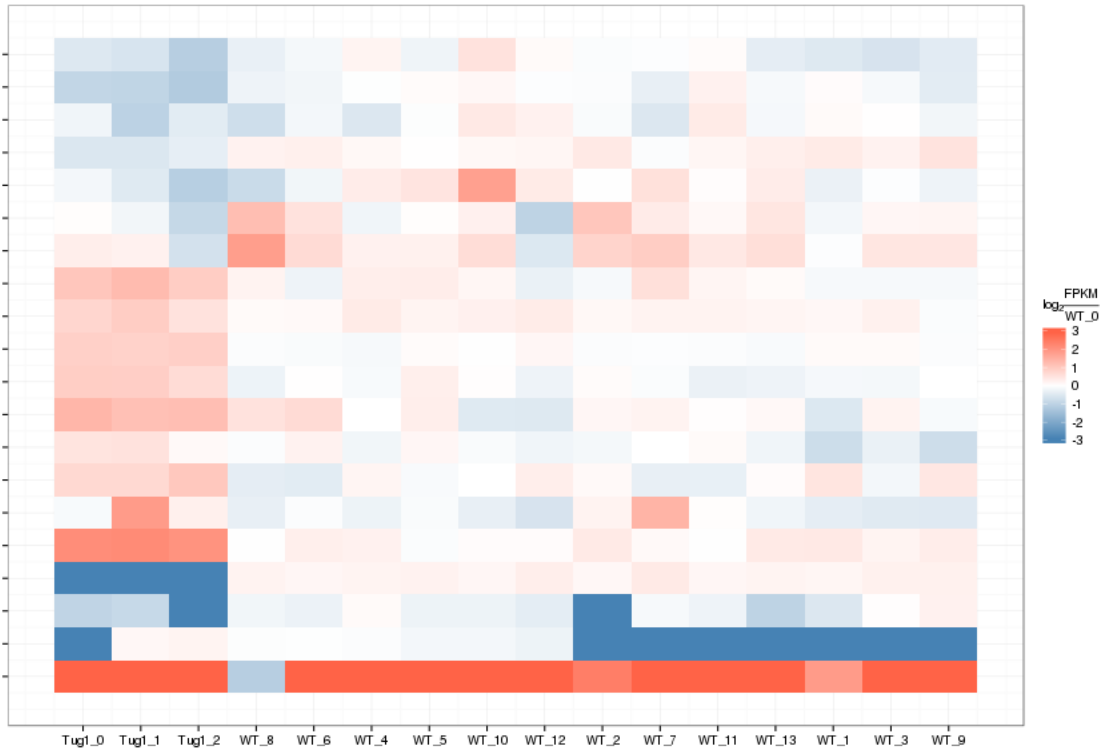

## Differential Splicing

### Differential Isoforms between conditions

Per isoform difference between conditions:

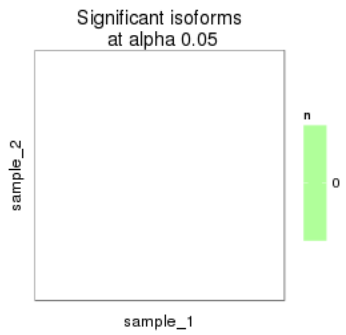

These isoforms are:

[1] "no sig isoforms"

Gene-level DE isoform heatmap

```
## [1] "no sig isoforms"
```

Isoform foldchange heatmap by isoform:

```
## [1] "no sig isoforms"
```

## Differential Splicing between conditions

(eval false for first pass)

Per condition differences in isoforms (Does gene have diff piechart between conditions?)

These genes are:

Splicing heatmap by isoform:

Splicing heatmap by gene

The following are significantly differentially spliced genes (relative portion of isoform per condition):

# Gene/Pathway Analysis

## GSEA

Enrichment and zscores are calculated based on expression in KO vs WT ( $\text{fpkmKO}/\text{fpkmWT}$ ), so genes that are down regulated in KO are shown in blue, while upregulation is shown in red.

KO/WT Blue = down in KO Red = Up in KO

Biocarta enrichment:

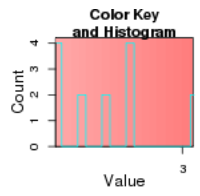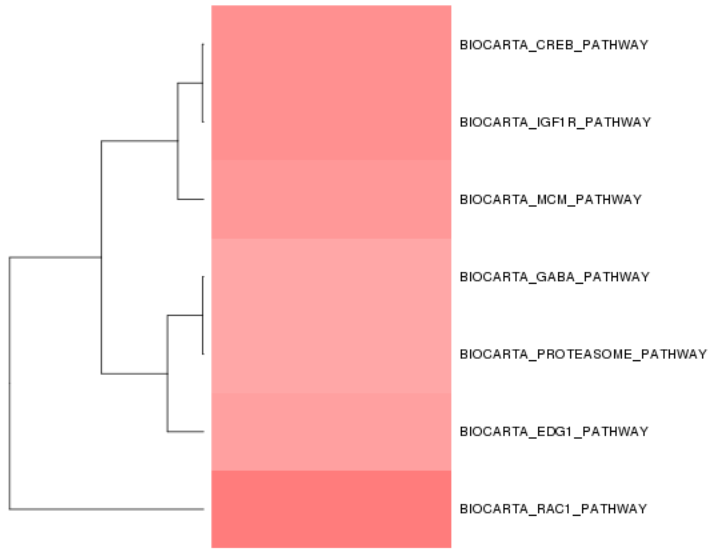

Biocarta zscore:

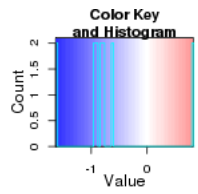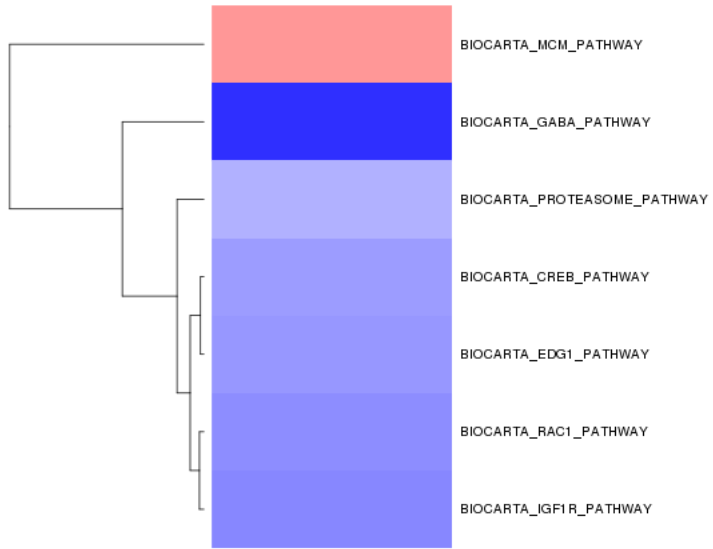

Reactome enrichment:

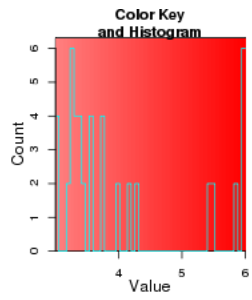

\_\_\_\_\_

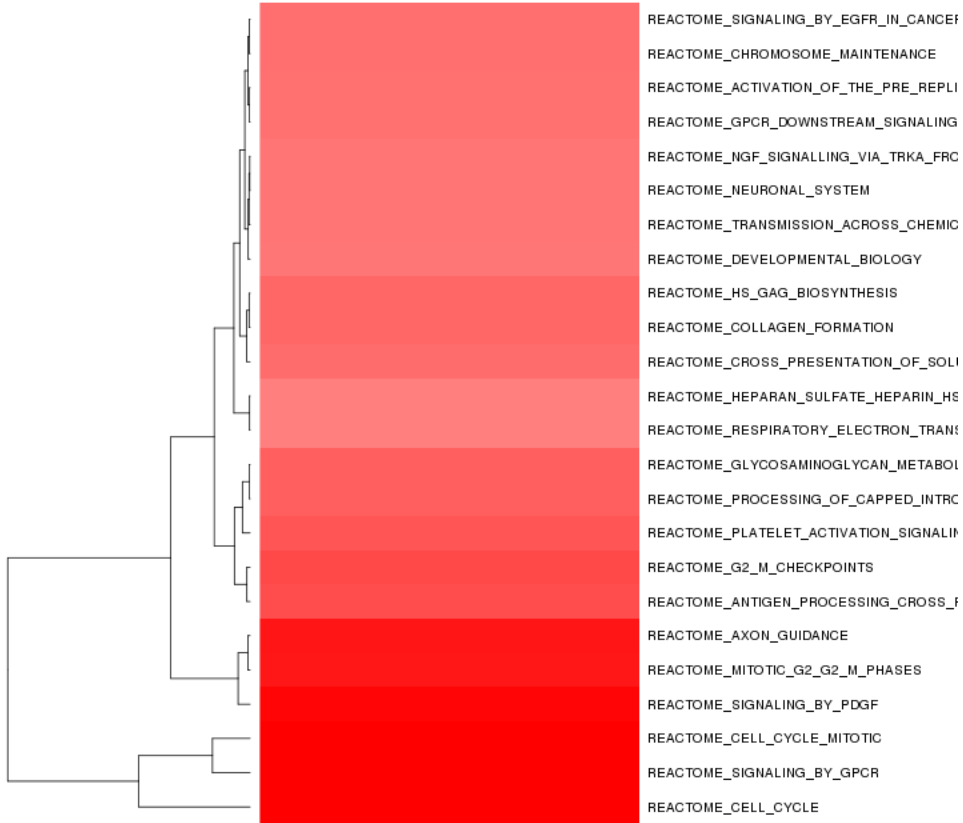

Reactome zscore:

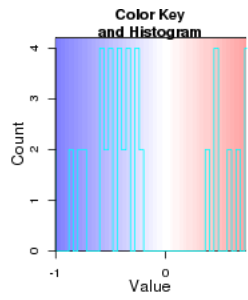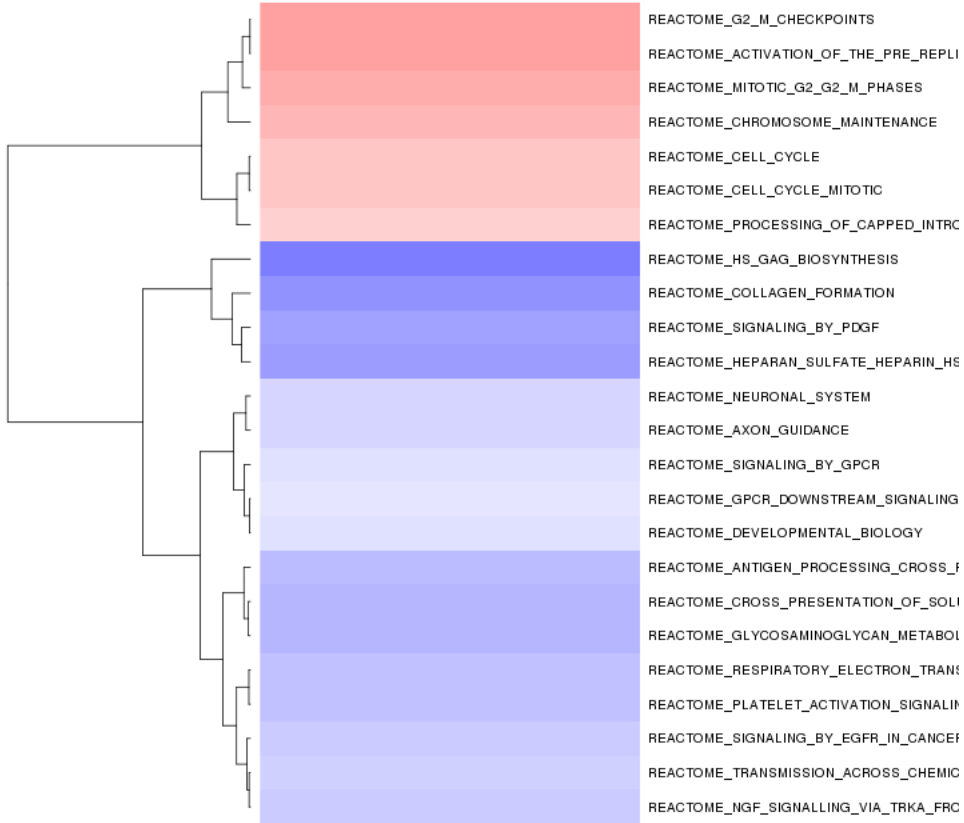

Kegg enrichment:



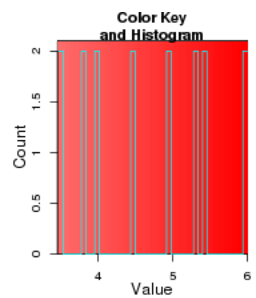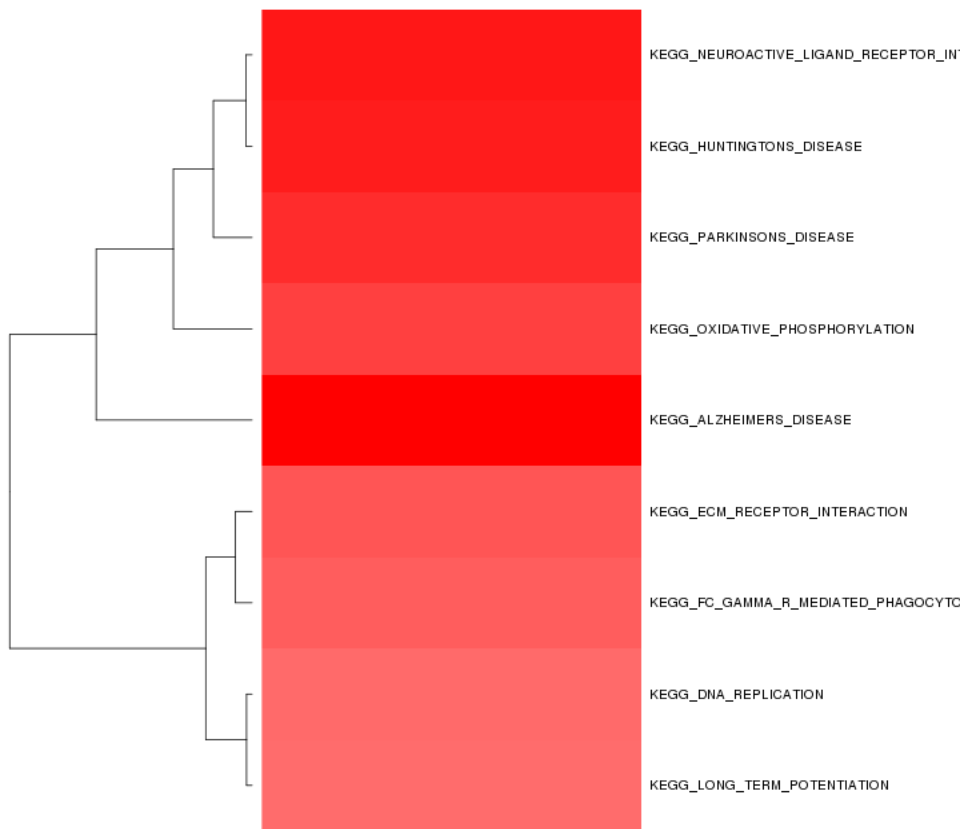

Kegg zscore:

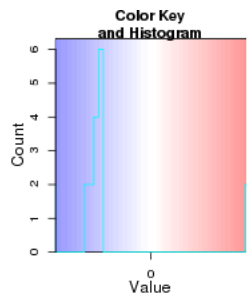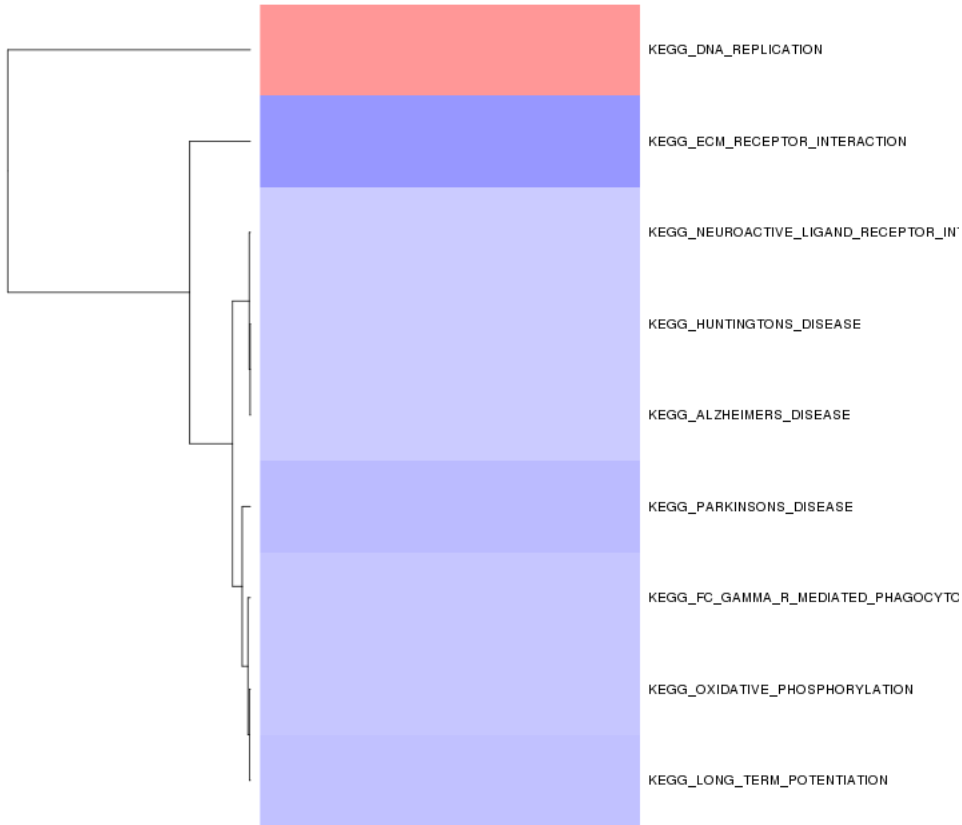

Interneuron enrichment:

```
## Error: argument is of length zero
```

Interneuron zscore:

```
## Error: incorrect number of dimensions
```

```
## Error: object 'x_ordered' not found
```

```
## Error: error in evaluating the argument 'x' in selecting a method for function 'as.matrix': Error: object 'x_ordered' not found
```

```
## Error: object 'x_ordered' not found
```

Oncogene enrichment:

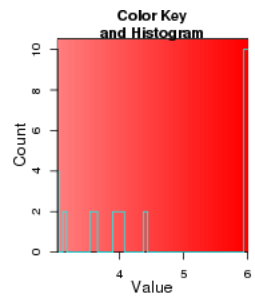

\_\_\_\_\_

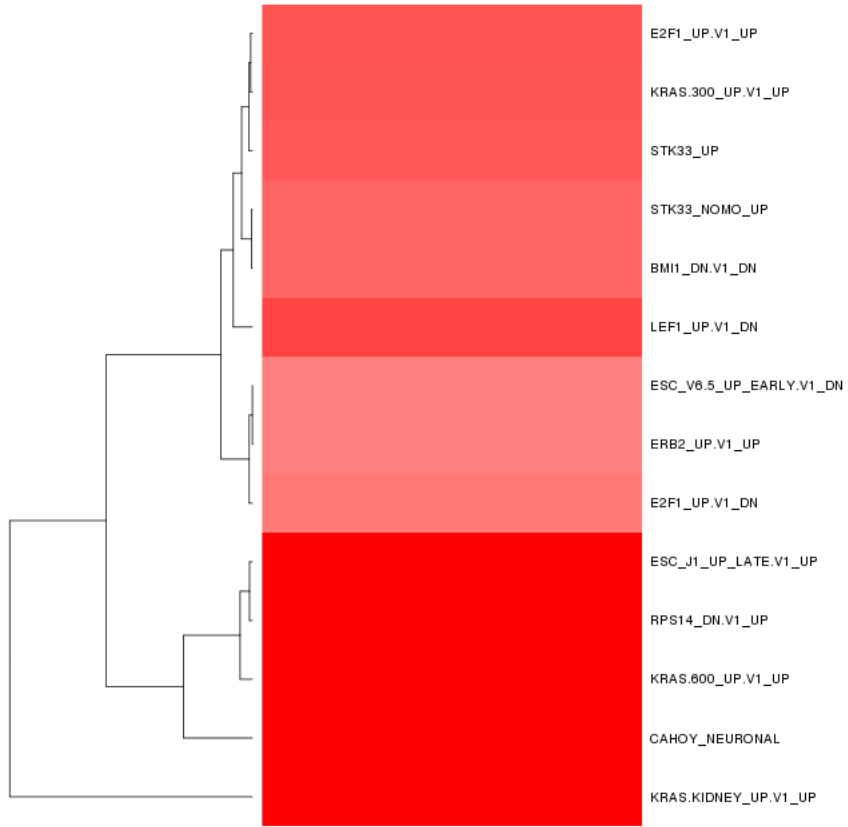

Oncogene zscore:

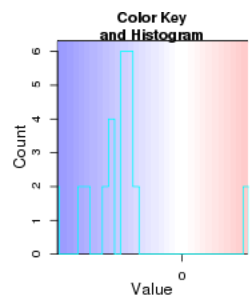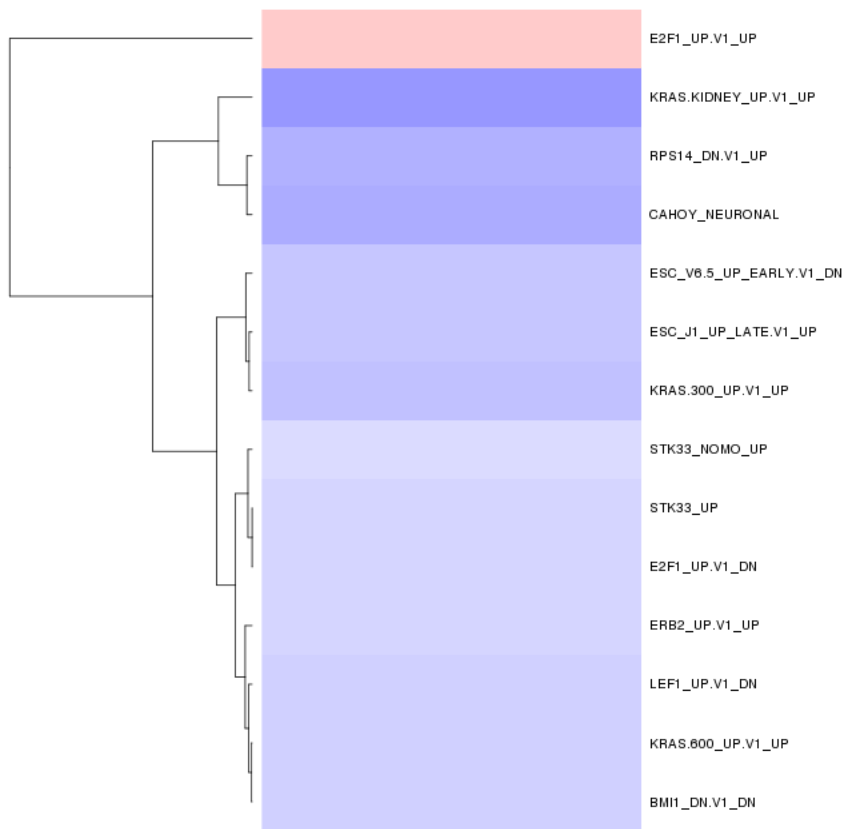

Immuno enrichment:

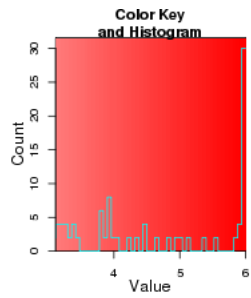

\_\_\_\_\_

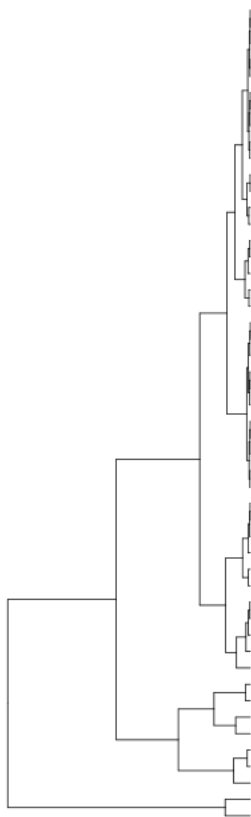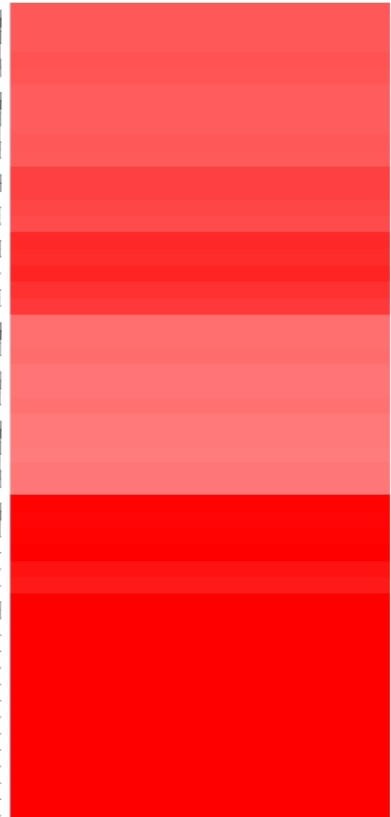

GSE22886\_UNSTIM\_VS\_IL15\_STIM\_NKCELL\_D  
 GSE22886\_NAIVE\_CD4\_TCELL\_VS\_MONOCYTE  
 GSE29618\_PDC\_VS\_MDC\_DAY7\_FLU\_VACCINE  
 GSE29618\_PRE\_VS\_DAY7\_POST\_TIV\_FLU\_VA  
 GSE9650\_EFFECTOR\_VS\_EXHAUSTED\_CD8\_T  
 GSE11057\_PBMC\_VS\_MEM\_CD4\_TCELL\_UP  
 GSE22886\_UNSTIM\_VS\_IL2\_STIM\_NKCELL\_DN  
 GSE29617\_CTRL\_VS\_DAY3\_TIV\_FLU\_VACCINE  
 GSE24634\_TREG\_VS\_TCONV\_POST\_DAY3\_IL4  
 GSE29618\_BCELL\_VS\_PDC\_DN  
 GSE11924\_TH2\_VS\_TH17\_CD4\_TCELL\_UP  
 GOLDRATH\_EFF\_VS\_MEMORY\_CD8\_TCELL\_UF  
 GSE15767\_MED\_VS\_SCS\_MAC\_LN\_UP  
 GSE17580\_UNINFECTED\_VS\_S\_MANSONI\_INF  
 GSE7852\_LN\_VS\_THYMUS\_TCONV\_DN  
 GSE1460\_INTRATHYMIC\_T\_PROGENITOR\_VS\_  
 GSE29618\_BCELL\_VS\_MONOCYTE\_DN  
 GSE11924\_TH1\_VS\_TH2\_CD4\_TCELL\_DN  
 GSE24634\_TREG\_VS\_TCONV\_POST\_DAY7\_IL4  
 GOLDRATH\_NAIVE\_VS\_EFF\_CD8\_TCELL\_DN  
 GSE7460\_CTRL\_VS\_TGFB\_TREATED\_ACT\_CD4  
 GSE22886\_NAIVE\_TCELL\_VS\_DC\_DN  
 GSE29618\_PDC\_VS\_MDC\_DN  
 GSE360\_DC\_VS\_MAC\_T\_GONDII\_DN  
 GSE9988\_ANTI\_TREM1\_VS\_LPS\_MONOCYTE\_I  
 GSE22886\_NAIVE\_BCELL\_VS\_DC\_DN  
 GSE1432\_IH\_VS\_24H\_IFNG\_MICROGLIA\_UP  
 GSE29618\_PDC\_VS\_MDC\_DAY7\_FLU\_VACCINE  
 GSE24634\_IL4\_VS\_CTRL\_TREATED\_NAIVE\_CI  
 GSE29617\_DAY3\_VS\_DAY7\_TIV\_FLU\_VACCINE  
 GSE10239\_NAIVE\_VS\_MEMORY\_CD8\_TCELL\_I  
 GSE7764\_IL15\_TREATED\_VS\_CTRL\_NK\_CELL  
 GSE1460\_CD4\_THYMOCYTE\_VS\_THYMIC\_STR  
 GSE29618\_BCELL\_VS\_MDC\_DN  
 GSE29618\_MONOCYTE\_VS\_MDC\_DAY7\_FLU\_V  
 GSE10325\_LUPUS\_BCELL\_VS\_LUPUS\_MYELO  
 GSE36476\_CTRL\_VS\_TSST\_ACT\_40H\_MEMOR  
 GSE10325\_LUPUS\_CD4\_TCELL\_VS\_LUPUS\_M  
 GSE29618\_MONOCYTE\_VS\_MDC\_UP  
 GSE12845\_IGD\_POS\_BLOOD\_VS\_PRE\_GC\_TO  
 GSE24634\_TREG\_VS\_TCONV\_POST\_DAY7\_IL4  
 GSE30962\_PRIMARY\_VS\_SECONDARY\_ACUTE  
 GSE36476\_CTRL\_VS\_TSST\_ACT\_40H\_MEMOR  
 GSE36476\_CTRL\_VS\_TSST\_ACT\_72H\_MEMOR  
 GSE36476\_CTRL\_VS\_TSST\_ACT\_72H\_MEMOR  
 GSE24634\_TEFF\_VS\_TCONV\_DAY7\_IN\_CULTU  
 GSE24634\_TREG\_VS\_TCONV\_POST\_DAY10\_IL  
 GSE29618\_MONOCYTE\_VS\_PDC\_UP  
 GSE15750\_DAY6\_VS\_DAY10\_EFF\_CD8\_TCELL  
 GSE15750\_DAY6\_VS\_DAY10\_TRAF6KO\_EFF\_C

Immuno zscore:

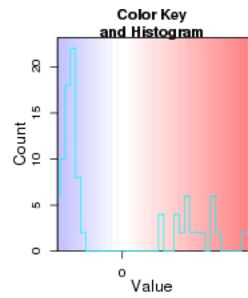

\_\_\_\_\_

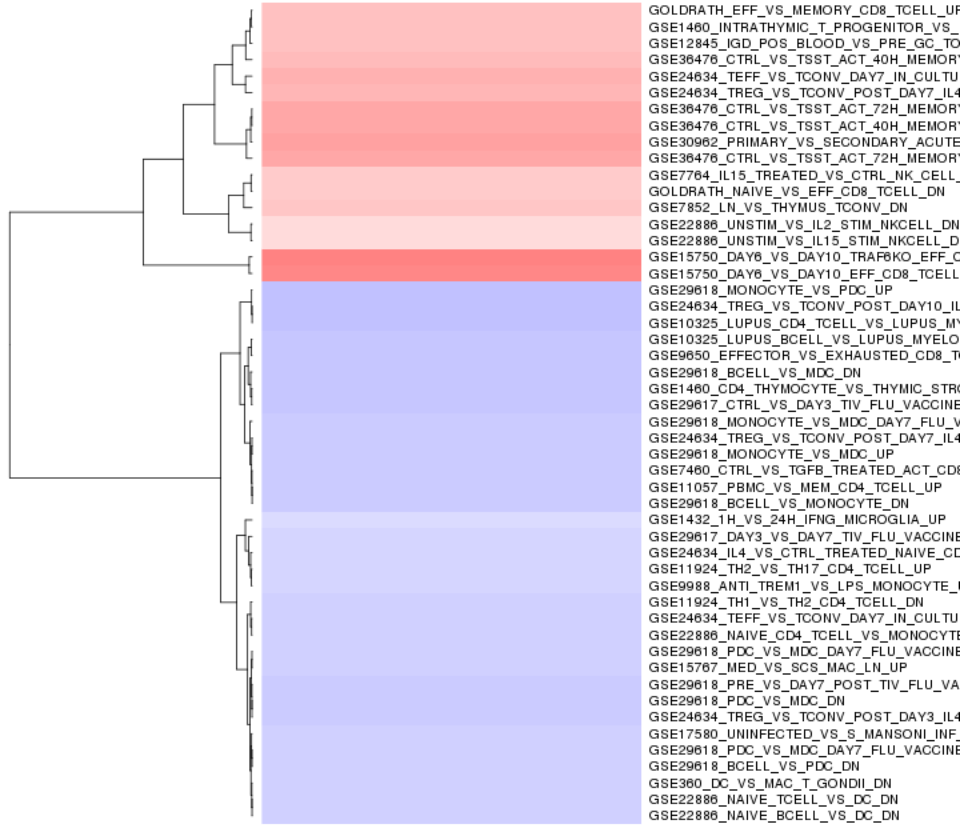

TF enrichment:

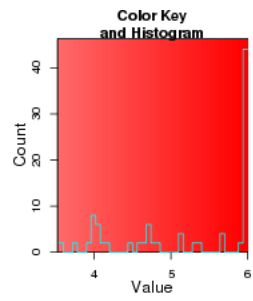

\_\_\_\_\_

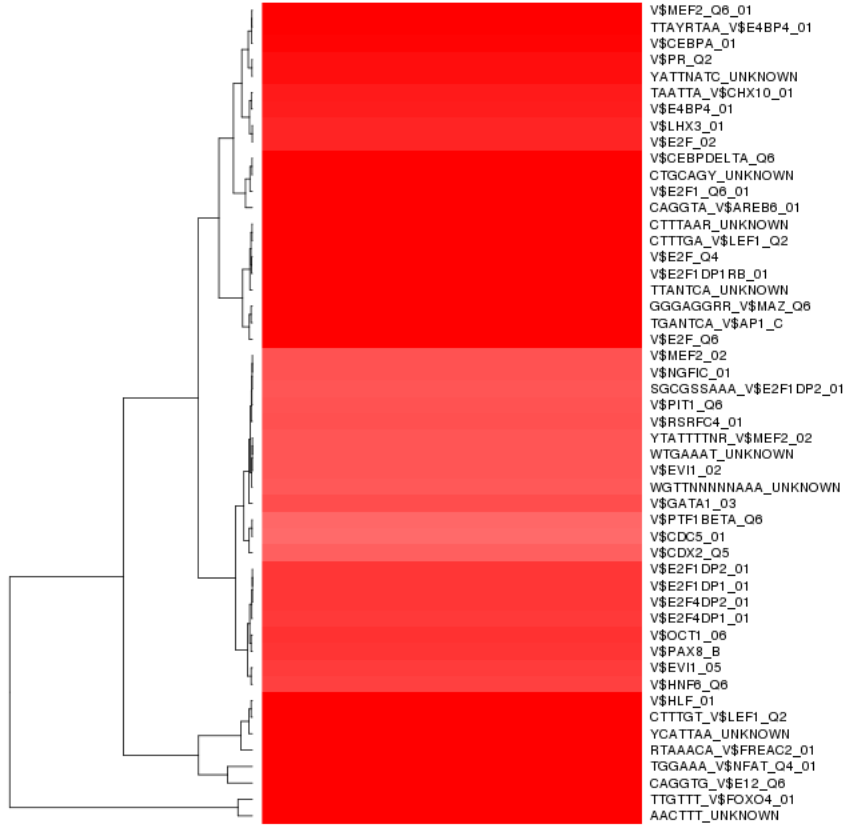

V\$MEF2\_Q6\_01  
 TTAYRTAA\_V\$E4BP4\_01  
 V\$CEBPA\_01  
 V\$PR\_Q2  
 YATTNATC\_UNKNOWN  
 TAATTA\_V\$CHX10\_01  
 V\$E4BP4\_01  
 V\$LHX3\_01  
 V\$E2F\_02  
 V\$CEBPDELTA\_Q6  
 CTGCAGY\_UNKNOWN  
 V\$E2F1\_Q6\_01  
 CAGGTA\_V\$AREB6\_01  
 CTTTAAR\_UNKNOWN  
 CTTTGA\_V\$LEF1\_Q2  
 V\$E2F\_Q4  
 V\$E2F1DP1RB\_01  
 TTANTCA\_UNKNOWN  
 GGGAGGRR\_V\$MAZ\_Q6  
 TGANTCA\_V\$AP1\_C  
 V\$E2F\_Q6  
 V\$MEF2\_Q2  
 V\$NGFIC\_01  
 SGGSSAAA\_V\$E2F1DP2\_01  
 V\$PIT1\_Q6  
 V\$RSRRC4\_01  
 YATTTTTNR\_V\$MEF2\_Q2  
 WTGAAAT\_UNKNOWN  
 V\$EV11\_Q2  
 WGTNNNNHAAA\_UNKNOWN  
 V\$GATA1\_Q3  
 V\$PTF1BETA\_Q6  
 V\$CDC5\_Q1  
 V\$CDX2\_Q5  
 V\$E2F1DP2\_01  
 V\$E2F1DP1\_01  
 V\$E2F4DP2\_01  
 V\$E2F4DP1\_01  
 V\$OCT1\_Q6  
 V\$PAX8\_B  
 V\$EV11\_Q5  
 V\$HNF8\_Q6  
 V\$HLF\_Q1  
 CTTTGT\_V\$LEF1\_Q2  
 YCAATTA\_UNKNOWN  
 RTAAACA\_V\$FREAC2\_01  
 TGGAAA\_V\$NFAT\_Q4\_01  
 CAGGTG\_V\$E12\_Q6  
 TTGTTT\_V\$FOXO4\_01  
 AACTTT\_UNKNOWN

TF zscore:



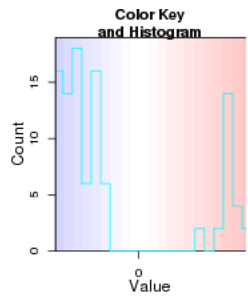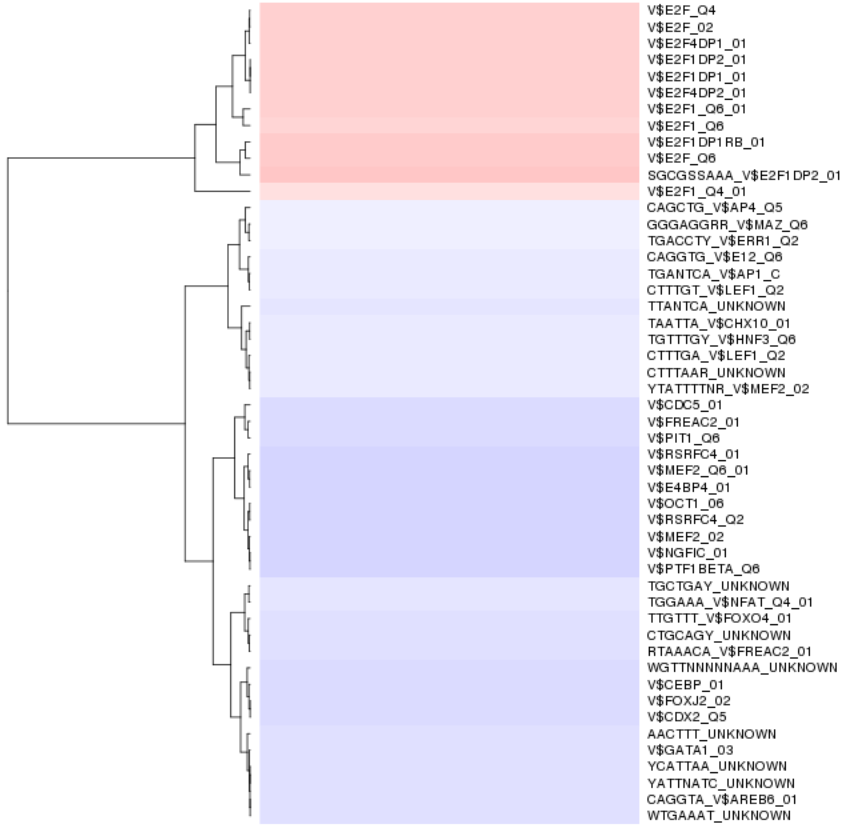

## GO enrichment

Cluster profiler used to call enrichments of significantly differentially regulated genes that map to Entrez IDs.

```
## Error: 'x' and 'units' must have length > 0
```

```
## Error: 'x' and 'units' must have length > 0
```

```
## Error: 'x' and 'units' must have length > 0
```

```
## Error: need finite 'xlim' values
```

```
## Error: need finite 'xlim' values
```

**Enrichment or depletion for stage-specific cell cycle markers**

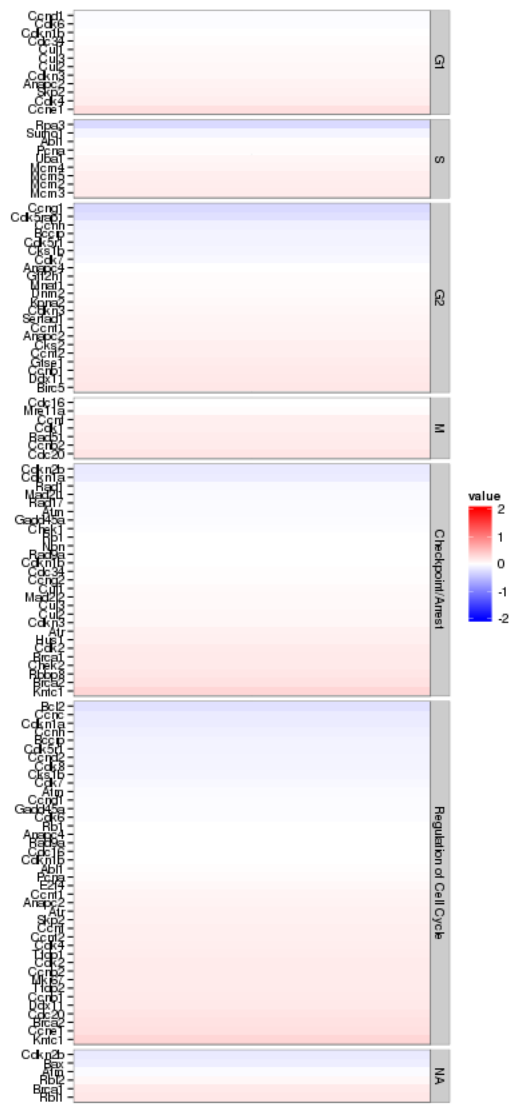

Enrichment or depletion for markers of specific cortical layers

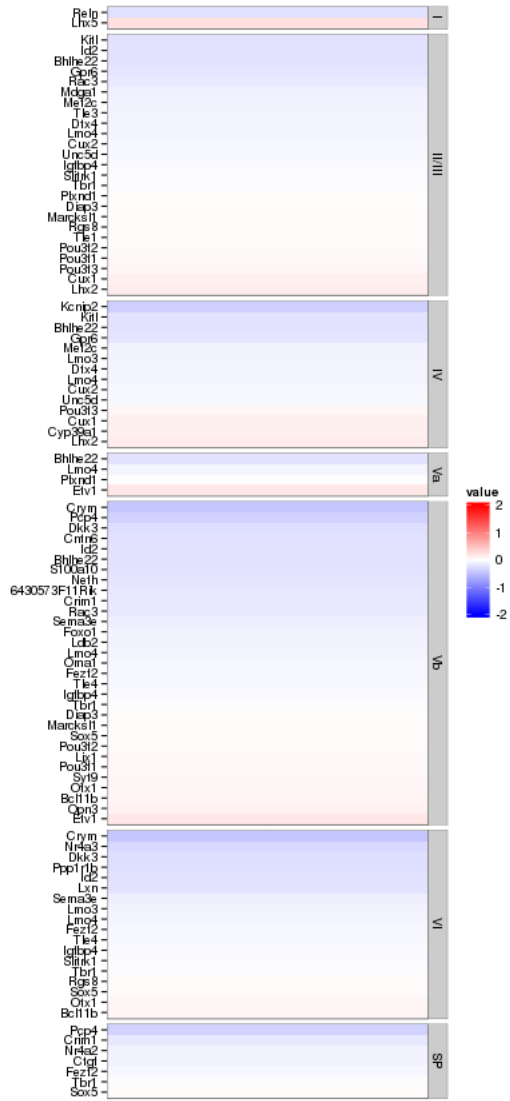

Enrichment or depletion for specific neural cell types

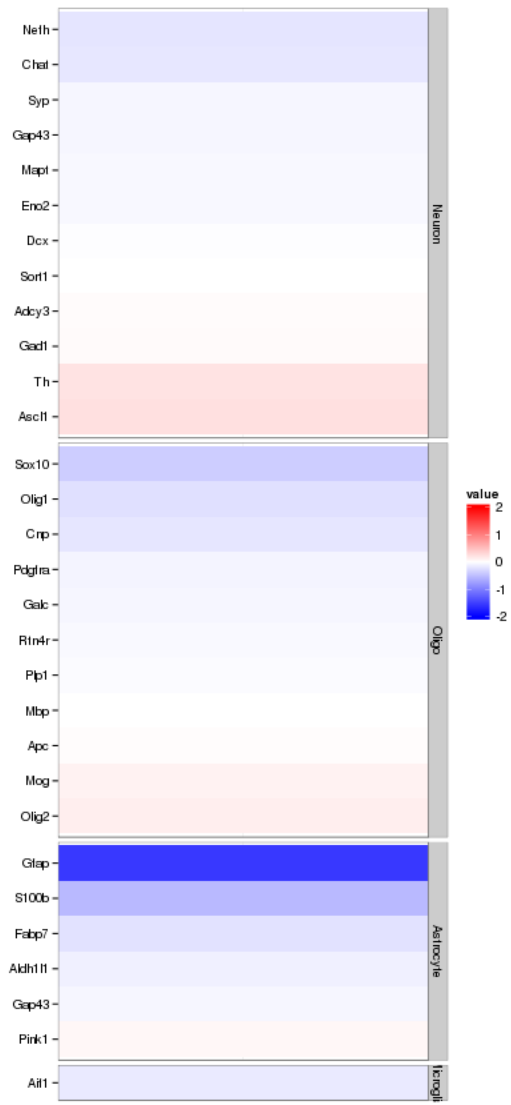

Enrichment or Depletion of neural differentiation markers

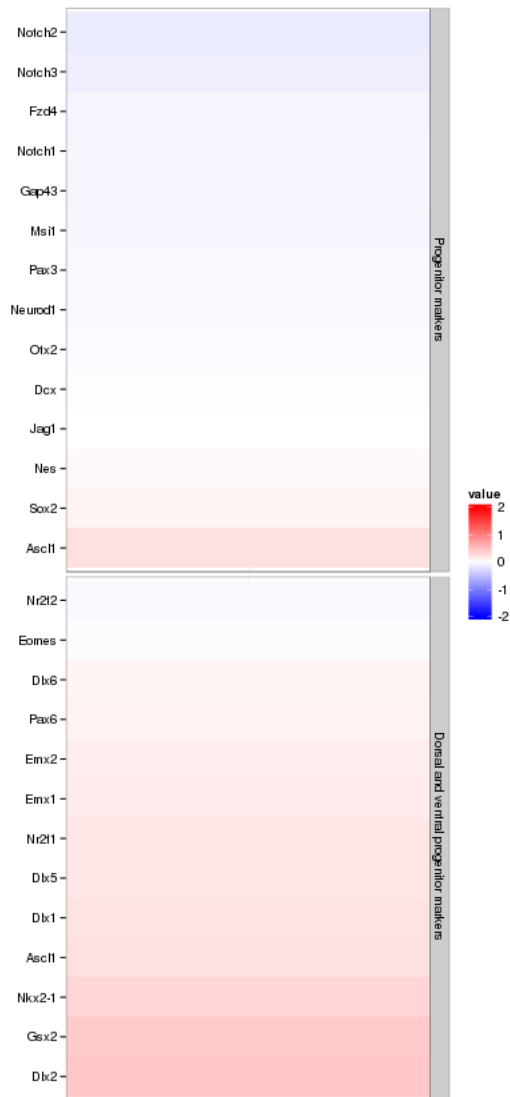

## Cis vs Trans (locally)

log2 Foldchange and test statistic are calculated with the ratio of fpkm(KO)/fpkm(WT), thus the test\_stat is positive if a gene is higher in the KO and negative if a gene has lower expression in the KO

The pvalue for 5 genes significantly regulated in a region this size is: 0.0023

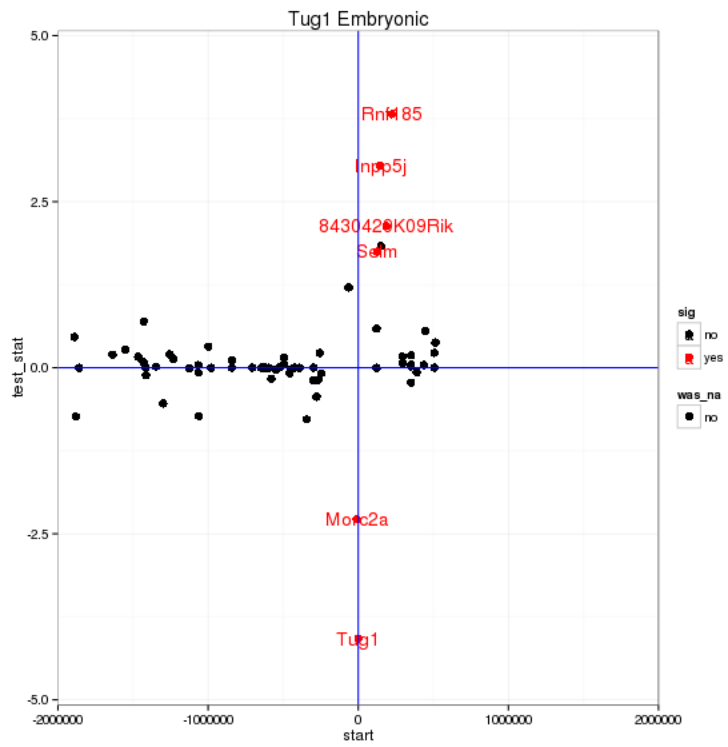

## Notes

Samples used are:

10

- 1 JR753
- 2 JR750
- 3 JR771
- 4 JR755
- 5 JR811
- 6 JR768
- 7 JR761
- 8 JR815
- 9 JR789
- 10 JR748
- 11 JR716
- 12 JR717
- 13 JR719
- 14 JR756

15 JR757  
16 JR857  
17 JR861

## Replicates

| file                                                                          | sample_name | replicate | rep_name | total_mass  | norm_mass   | internal_scale | external_scale |
|-------------------------------------------------------------------------------|-------------|-----------|----------|-------------|-------------|----------------|----------------|
| 1 /n/rinn_data1/seq/fgoff/Projects/BrainMap/data/quants/JR753/abundances.cxb  | WT          | 0         | WT_0     | 39331900.00 | 33091500.00 | 1.23           | 1.00           |
| 2 /n/rinn_data1/seq/fgoff/Projects/BrainMap/data/quants/JR750/abundances.cxb  | WT          | 1         | WT_1     | 36031100.00 | 33091500.00 | 1.07           | 1.00           |
| 3 /n/rinn_data1/seq/fgoff/Projects/BrainMap/data/quants/JR771/abundances.cxb  | WT          | 2         | WT_2     | 38857100.00 | 33091500.00 | 1.20           | 1.00           |
| 4 /n/rinn_data1/seq/fgoff/Projects/BrainMap/data/quants/JR755/abundances.cxb  | WT          | 3         | WT_3     | 41811300.00 | 33091500.00 | 1.25           | 1.00           |
| 5 /n/rinn_data1/seq/fgoff/Projects/BrainMap/data/quants/JR811/abundances.cxb  | WT          | 4         | WT_4     | 38172800.00 | 33091500.00 | 1.17           | 1.00           |
| 6 /n/rinn_data1/seq/fgoff/Projects/BrainMap/data/quants/JR768/abundances.cxb  | WT          | 5         | WT_5     | 28375200.00 | 33091500.00 | 0.87           | 1.00           |
| 7 /n/rinn_data1/seq/fgoff/Projects/BrainMap/data/quants/JR761/abundances.cxb  | WT          | 6         | WT_6     | 31706200.00 | 33091500.00 | 0.95           | 1.00           |
| 8 /n/rinn_data1/seq/fgoff/Projects/BrainMap/data/quants/JR815/abundances.cxb  | WT          | 7         | WT_7     | 29733100.00 | 33091500.00 | 0.90           | 1.00           |
| 9 /n/rinn_data1/seq/fgoff/Projects/BrainMap/data/quants/JR789/abundances.cxb  | WT          | 8         | WT_8     | 27681500.00 | 33091500.00 | 0.84           | 1.00           |
| 10 /n/rinn_data1/seq/fgoff/Projects/BrainMap/data/quants/JR748/abundances.cxb | WT          | 9         | WT_9     | 32367000.00 | 33091500.00 | 0.94           | 1.00           |
| 11 /n/rinn_data1/seq/fgoff/Projects/BrainMap/data/quants/JR716/abundances.cxb | WT          | 10        | WT_10    | 26144700.00 | 33091500.00 | 0.79           | 1.00           |
| 12 /n/rinn_data1/seq/fgoff/Projects/BrainMap/data/quants/JR717/abundances.cxb | WT          | 11        | WT_11    | 25565400.00 | 33091500.00 | 0.78           | 1.00           |
| 13 /n/rinn_data1/seq/fgoff/Projects/BrainMap/data/quants/JR719/abundances.cxb | WT          | 12        | WT_12    | 22697800.00 | 33091500.00 | 0.67           | 1.00           |
| 14 /n/rinn_data1/seq/fgoff/Projects/BrainMap/data/quants/JR756/abundances.cxb | WT          | 13        | WT_13    | 38948900.00 | 33091500.00 | 1.18           | 1.00           |
| 15 /n/rinn_data1/seq/fgoff/Projects/BrainMap/data/quants/JR757/abundances.cxb | Tug1        | 0         | Tug1_0   | 33398300.00 | 33091500.00 | 1.02           | 1.00           |
| 16 /n/rinn_data1/seq/fgoff/Projects/BrainMap/data/quants/JR857/abundances.cxb | Tug1        | 1         | Tug1_1   | 39157600.00 | 33091500.00 | 1.22           | 1.00           |
| 17 /n/rinn_data1/seq/fgoff/Projects/BrainMap/data/quants/JR861/abundances.cxb | Tug1        | 2         | Tug1_2   | 43124000.00 | 33091500.00 | 1.27           | 1.00           |

## Session Info

```
## R version 3.0.2 (2013-09-25)
## Platform: x86_64-unknown-linux-gnu (64-bit)
##
## locale:
## [1] LC_CTYPE=en_US.UTF-8      LC_NUMERIC=C
## [3] LC_TIME=en_US.UTF-8      LC_COLLATE=en_US.UTF-8
## [5] LC_MONETARY=en_US.UTF-8  LC_MESSAGES=en_US.UTF-8
## [7] LC_PAPER=en_US.UTF-8     LC_NAME=C
## [9] LC_ADDRESS=C             LC_TELEPHONE=C
## [11] LC_MEASUREMENT=en_US.UTF-8 LC_IDENTIFICATION=C
##
## attached base packages:
## [1] grid      parallel  methods  stats    graphics  grDevices  utils
## [8] datasets  base
##
## other attached packages:
## [1] plyr_1.8.1
## [2] stringr_0.6.2
## [3] seqbias_1.10.0
```



```

## [4] BSgenome.Mmusculus.UCSC.mm10_1.3.19
## [5] BSgenome_1.30.0
## [6] Biostrings_2.30.1
## [7] gdata_2.13.3
## [8] GO.db_2.10.1
## [9] org.Mm.eg.db_2.10.1
## [10] clusterProfiler_1.13.1
## [11] DOSE_2.0.0
## [12] ReactomePA_1.6.1
## [13] AnnotationDbi_1.24.0
## [14] Biobase_2.22.0
## [15] mgcv_1.7-29
## [16] nlme_3.1-117
## [17] RMySQL_0.9-3
## [18] RColorBrewer_1.0-5
## [19] gridExtra_0.9.1
## [20] gtable_0.1.2
## [21] marray_1.40.0
## [22] gplots_2.13.0
## [23] GSA_1.03
## [24] limma_3.18.13
## [25] xtable_1.7-3
## [26] cummeRbund_2.7.2
## [27] Gviz_1.6.0
## [28] rtracklayer_1.22.7
## [29] GenomicRanges_1.14.4
## [30] XVector_0.2.0
## [31] IRanges_1.20.7
## [32] fastcluster_1.1.13
## [33] reshape2_1.4
## [34] ggplot2_1.0.0
## [35] RSQLite_0.11.4
## [36] DBI_0.2-7
## [37] BiocGenerics_0.8.0
## [38] knitr_1.6
##
## loaded via a namespace (and not attached):
## [1] biomaRt_2.18.0      biovizBase_1.10.8   bitops_1.0-6
## [4] caTools_1.17        cluster_1.15.2      colorspace_1.2-4
## [7] dichromat_2.0-0     digest_0.6.4        DO.db_2.7
## [10] evaluate_0.5.5      formatR_0.10        Formula_1.1-1
## [13] GenomicFeatures_1.14.5 GOSemSim_1.20.3     graph_1.40.1
## [16] graphite_1.8.1      gtools_3.4.1        Hmisc_3.14-4
## [19] igraph_0.7.1        KEGG.db_2.10.1      KernSmooth_2.23-12
## [22] labeling_0.2        lattice_0.20-29     latticeExtra_0.6-26
## [25] MASS_7.3-33         Matrix_1.1-3        munsell_0.4.2
## [28] org.Hs.eg.db_2.10.1 proto_0.3-10        qvalue_1.36.0
## [31] Rcpp_0.11.2         RCurl_1.95-4.1      reactome.db_1.46.1
## [34] Rsamtools_1.14.3    scales_0.2.4        splines_3.0.2
## [37] stats4_3.0.2        survival_2.37-7     tcltk_3.0.2
## [40] tools_3.0.2         XML_3.98-1.1        zlibbioc_1.8.0

```

## Run Info

```
##          param
## 1      cmd_line
## 2          version
## 3  SVN_revision
## 4  boost_version
## 5          genome
##
## 1 cuffdiff -p 10 -L WT,Tug1 -o /n/rinn_data1/seq/lgoff/Projects/BrainMap/data/diffs/Tug1_vs_WT_Embryonic /n/rinn_data1/seq/lgoff/Projects/BrainMap/data/
## 2
## 3
## 4
## 5
```
